# Supplementary material
Source: PubMed Central journal article supplement (PMC3086450)
Supplement: NIHMS283894-supplement-Supplementary_Table_1.pdf [file NIHMS283894-supplement-Supplementary_Table_1.pdf]

Supplementary Table 1. The complete list of proteins identified in iTRAQ based quantitative proteomic comparison of ESCs and ECCs. The table shows the number of peptides with >95% confidence among all the peptide identified per protein with p value; EF, The error factor is a measure of the certainty of the average ratio. Proteinpilot calculates Error factor, =  $10^{0.95 \times \text{Confidence error}}$ . (Technical duplicate values are shown). Data from three different experiments are shown in separate rows with specific sample name.

**False Discovery Rates: Number of Proteins Identified at Critical False Discovery Rates**

| Experiment    | Local FDR (1%) | Global FDR(1%) | Local FDR (5%) | Global FDR(5%) |
|---------------|----------------|----------------|----------------|----------------|
| Whole cell    | 622            | 847            | 859            | 1172           |
| Cytosolic     | 918            | 918            | 945            |                |
| Non-cytosolic | 445            | 729            |                |                |

**False Discovery Rates: Number of peptides Identified at Critical False Discovery Rates**

| Experiment    | Local FDR (1%) | Global FDR(1%) | Local FDR (5%) | Global FDR(5%) |
|---------------|----------------|----------------|----------------|----------------|
| Whole cell    | 4618           | 6106           | 5781           | 7736           |
| Cytosolic     | 3501           | 4300           | 3966           | 5189           |
| Non-cytosolic | 2313           | 3022           | 2811           | 3682           |

| Unused score | Gene Symbol | gi Accession | Experiment                                                             | Local FDR (1%) | Global FDR | Samples   | >95% conf Peptides | Ratio ESC/ECC | PVal ESC/ECC | EF ESC/ECC | ratio ESC/ECC | PVal ESC/ECC | EF ESC/ECC |
|--------------|-------------|--------------|------------------------------------------------------------------------|----------------|------------|-----------|--------------------|---------------|--------------|------------|---------------|--------------|------------|
| 82.69        | FASN        | 41872631     | fatty acid synthase                                                    |                |            | Cytosolic | 41                 | 0.65          | 0.08         | 1.26       | 0.78          | 0.29         | 1.18       |
| 82.68        | HSP90AB1    | 20149594     | heat shock 90kDa protein 1, beta                                       |                |            | Cytosolic | 66                 | 1.77          | 0.01         | 1.19       | 1.79          | 0.01         | 1.20       |
| 61.38        | EEF2        | 4503483      | eukaryotic translation elongation factor 2                             |                |            | Cytosolic | 39                 | 2.11          | 0.00         | 1.29       | 2.01          | 0.00         | 1.28       |
| 59.49        | HSPA8       | 5729877      | heat shock 70kDa protein 8 isoform 1                                   |                |            | Cytosolic | 36                 | 1.96          | 0.00         | 1.29       | 1.94          | 0.00         | 1.29       |
| 59.38        | TUBB2C      | 5174735      | tubulin, beta, 2                                                       |                |            | Cytosolic | 42                 | 0.68          | 0.41         | 1.38       |               | 0.57         | 1.38       |
| 58.87        | ACTG1       | 4501887      | actin, gamma 1 propeptide                                              |                |            | Cytosolic | 55                 | 0.95          | 0.22         | 1.04       | 0.95          | 0.32         | 1.04       |
| 51.12        | GAPDH       | 7669492      | glyceraldehyde-3-phosphate dehydrogenase                               |                |            | Cytosolic | 66                 | 0.47          | 0.00         | 1.19       | 0.48          | 0.00         | 1.19       |
| 50.95        | FLNA        | 116063573    | filamin A, alpha                                                       |                |            | Cytosolic | 23                 | 3.63          | 0.00         | 1.46       | 3.56          | 0.00         | 1.43       |
| 49.92        | VCP         | 6005942      | valosin-containing protein                                             |                |            | Cytosolic | 26                 | 1.28          | 0.19         | 1.24       | 1.46          | 0.03         | 1.26       |
| 47.57        | PKM2        | 33286418     | pyruvate kinase 3 isoform 1                                            |                |            | Cytosolic | 29                 | 0.95          | 0.94         | 2.09       | 1.10          | 0.84         | 2.09       |
| 40.03        | EEF1A1      | 4503471      | eukaryotic translation elongation factor 1 alpha 1                     |                |            | Cytosolic | 23                 | 1.72          | 0.05         | 1.22       | 1.72          | 0.05         | 1.22       |
| 37.81        | VIM         | 62414289     | vimentin                                                               |                |            | Cytosolic | 24                 | 0.61          | 0.00         | 1.14       | 0.60          | 0.00         | 1.15       |
| 36.52        | TKT         | 4507521      | transketolase                                                          |                |            | Cytosolic | 21                 | 1.92          | 0.02         | 1.38       | 1.75          | 0.06         | 1.33       |
| 35.34        | LDHB        | 4557032      | lactate dehydrogenase B                                                |                |            | Cytosolic | 21                 | 0.18          | 0.00         | 1.89       | 0.13          | 0.00         | 2.17       |
| 33.91        | CLTC        | 4758012      | clathrin heavy chain 1                                                 |                |            | Cytosolic | 17                 | 0.71          | 0.12         | 1.19       | 0.69          | 0.07         | 1.21       |
| 32.39        | TUBA1B      | 57013276     | tubulin, alpha, ubiquitous                                             |                |            | Cytosolic | 25                 | 0.90          | 0.75         | 1.25       | 0.94          | 0.86         | 1.25       |
| 32.28        | CCT8        | 48762932     | chaperonin containing TCP1, subunit 8 (theta)                          |                |            | Cytosolic | 16                 | 0.72          | 0.10         | 1.21       | 0.65          | 0.03         | 1.20       |
| 31.97        | ACTN4       | 12025678     | actinin, alpha 4                                                       |                |            | Cytosolic | 15                 | 1.75          | 0.03         | 1.50       | 2.05          | 0.02         | 1.53       |
| 30.81        | VCL         | 7669550      | vinculin isoform meta-VCL                                              |                |            | Cytosolic | 17                 | 5.15          | 0.00         | 1.80       | 5.81          | 0.00         | 1.84       |
| 30.17        | HSP90AA1    | 40254816     | heat shock protein 90kDa alpha (cytosolic), class A member 1 isoform 2 |                |            | Cytosolic | 48                 | 0.97          | 0.86         | 1.13       | 0.81          | 0.78         | 1.17       |
| 29.93        | FKBP4       | 4503729      | FK506-binding protein 4                                                |                |            | Cytosolic | 17                 | 0.35          | 0.00         | 1.41       | 0.34          | 0.00         | 1.42       |
| 29.74        | TPI1        | 4507645      | triosephosphate isomerase 1                                            |                |            | Cytosolic | 19                 | 0.33          | 0.00         | 1.39       | 0.25          | 0.00         | 1.56       |
| 29.25        | PRDX6       | 4758638      | peroxiredoxin 6                                                        |                |            | Cytosolic | 18                 | 2.21          | 0.00         | 1.38       | 2.13          | 0.00         | 1.37       |
| 29.12        | ENO1        | 4503571      | enolase 1                                                              |                |            | Cytosolic | 20                 | 1.67          | 0.07         | 1.31       | 1.63          | 0.25         | 1.29       |
| 28.93        | PHGDH       | 23308577     | phosphoglycerate dehydrogenase                                         |                |            | Cytosolic | 16                 | 0.66          | 0.08         | 1.20       | 0.66          | 0.14         | 1.22       |
| 28.43        | AHCY        | 9951915      | S-adenosylhomocysteine hydrolase                                       |                |            | Cytosolic | 15                 | 1.77          | 0.00         | 1.26       | 1.91          | 0.00         | 1.26       |
| 27.57        | PGK1        | 4505763      | phosphoglycerate kinase 1                                              |                |            | Cytosolic | 17                 | 0.55          | 0.03         | 1.24       | 0.58          | 0.06         | 1.21       |
| 27.48        | UBA1        | 23510340     | ubiquitin-activating enzyme E1                                         |                |            | Cytosolic | 13                 | 0.67          | 0.11         | 1.15       | 0.73          | 0.44         | 1.15       |
| 27.17        | HSPD1       | 41399285     | chaperonin                                                             |                |            | Cytosolic | 16                 | 0.66          | 0.13         | 1.24       | 0.57          | 0.08         | 1.32       |
| 26.63        | CCT5        | 24307939     | chaperonin containing TCP1, subunit 5 (epsilon)                        |                |            | Cytosolic | 12                 | 0.90          | 0.43         | 1.07       | 0.86          | 0.46         | 1.10       |
| 26.19        | PRDX1       | 4505591      | peroxiredoxin 1                                                        |                |            | Cytosolic | 13                 | 0.64          | 0.08         | 1.18       | 0.65          | 0.06         | 1.17       |
| 26.19        | HNRNPU      | 74136883     | heterogeneous nuclear ribonucleoprotein U isoform a                    |                |            | Cytosolic | 11                 | 0.63          | 0.02         | 1.16       | 0.51          | 0.01         | 1.24       |
| 25.93        | IPO5        | 24797086     | RAN binding protein 5                                                  |                |            | Cytosolic | 14                 | 1.32          | 0.18         | 1.16       | 1.34          | 0.14         | 1.17       |
| 25.92        | ANXA6       | 71773329     | annexin VI isoform 1                                                   |                |            | Cytosolic | 12                 | 1.50          | 0.01         | 1.14       | 1.47          | 0.01         | 1.13       |
| 25.44        | FLNC        | 116805322    | gamma filamin                                                          |                |            | Cytosolic | 15                 | 0.32          | 0.00         | 1.67       | 0.35          | 0.00         | 1.50       |
| 24.9         | DHX9        | 100913206    | DEAH (Asp-Glu-Ala-His) box polypeptide 9                               |                |            | Cytosolic | 12                 | 0.45          | 0.00         | 1.38       | 0.39          | 0.00         | 1.46       |
| 24.89        | NASP        | 27262634     | nuclear autoantigenic sperm protein isoform 1                          |                |            | Cytosolic | 16                 | 0.60          | 0.90         | 1.26       | 0.59          | 0.60         | 1.24       |
| 24.46        | EIF4A1      | 4503529      | eukaryotic translation initiation factor 4A isoform 1                  |                |            | Cytosolic | 17                 | 1.80          | 0.18         | 1.31       | 1.66          | 0.19         | 1.29       |
| 24.09        | CCT2        | 5453603      | chaperonin containing TCP1, subunit 2                                  |                |            | Cytosolic | 12                 | 1.00          | 0.86         | 1.04       | 0.98          | 0.85         | 1.04       |
| 23.84        | HSPA5       | 16507237     | heat shock 70kDa protein 5                                             |                |            | Cytosolic | 14                 | 1.41          | 0.06         | 1.27       | 1.50          | 0.06         | 1.26       |
| 23.62        | HSP90B1     | 4507677      | tumor rejection antigen (gp96) 1                                       |                |            | Cytosolic | 15                 | 1.46          | 0.22         | 1.22       | 1.45          | 0.22         | 1.22       |

|       |           |           |                                                                                    |           |    |      |      |      |      |      |      |
|-------|-----------|-----------|------------------------------------------------------------------------------------|-----------|----|------|------|------|------|------|------|
| 23.29 | CCT3      | 63162572  | chaperonin containing TCP1, subunit 3 isoform a                                    | Cytosolic | 11 | 0.63 | 0.60 | 1.42 | 0.72 | 0.54 | 1.33 |
| 22.58 | EPRS      | 62241042  | glutamyl-prolyl tRNA synthetase                                                    | Cytosolic | 11 | 0.89 | 0.34 | 1.07 | 0.90 | 0.40 | 1.07 |
| 22.47 | IDH1      | 28178825  | isocitrate dehydrogenase 1 (NADP+), soluble                                        | Cytosolic | 12 | 1.38 | 0.18 | 1.18 | 1.37 | 0.29 | 1.20 |
| 22.32 | STIP1     | 5803181   | stress-induced-phosphoprotein 1 (Hsp70/Hsp90-organizing protein)                   | Cytosolic | 11 | 0.80 | 0.38 | 1.22 | 0.69 | 0.13 | 1.25 |
| 22.28 | KRT8      | 4504919   | keratin 8                                                                          | Cytosolic | 9  | 0.42 | 0.00 | 1.37 | 0.42 | 0.00 | 1.37 |
| 22.11 | YWHAE     | 5803225   | tyrosine 3/tryptophan 5 -monooxygenase activation protein, epsilon                 | Cytosolic | 15 | 0.95 | 0.54 | 1.05 | 0.95 | 0.39 | 1.05 |
| 22.11 | GANAB     | 38202257  | alpha glucosidase II alpha subunit isoform 2                                       | Cytosolic | 10 | 0.58 | 0.03 | 1.36 | 0.61 | 0.03 | 1.31 |
| 22    | NCL       | 55956788  | nucleolin                                                                          | Cytosolic | 13 | 0.68 | 0.34 | 1.27 | 0.51 | 0.11 | 1.41 |
| 21.97 | DDX17     | 38201710  | DEAD box polypeptide 17 isoform p82                                                | Cytosolic | 11 | 0.57 | 0.02 | 1.41 | 0.52 | 0.01 | 1.38 |
| 21.8  | LOC643576 | 89036292  | PREDICTED: similar to Phosphoglycerate mutase 1                                    | Cytosolic | 12 | 1.82 | 0.03 | 1.21 | 1.67 | 0.07 | 1.20 |
| 21.72 | FSCN1     | 4507115   | fascin 1                                                                           | Cytosolic | 14 | 1.53 | 0.06 | 1.22 | 1.56 | 0.04 | 1.24 |
| 21.63 | PSMD2     | 25777602  | proteasome 26S non-ATPase subunit 2                                                | Cytosolic | 11 | 0.52 | 0.31 | 1.57 | 0.61 | 0.36 | 1.46 |
| 21.23 | TPM1      | 63252900  | tropomyosin 1 alpha chain isoform 4                                                | Cytosolic | 10 | 0.52 | 0.07 | 1.27 | 0.52 | 0.05 | 1.29 |
| 21.17 | XRCC5     | 10863945  | ATP-dependent DNA helicase II                                                      | Cytosolic | 12 | 0.98 | 0.84 | 1.05 | 0.97 | 0.91 | 1.05 |
| 21.11 | TLN1      | 16753233  | talín 1                                                                            | Cytosolic | 10 | 0.73 | 0.17 | 1.38 | 0.90 | 0.50 | 1.26 |
| 21.07 | NME1-NME2 | 66392203  | NME1-NME2 protein                                                                  | Cytosolic | 12 | 1.67 | 0.31 | 1.26 | 1.84 | 0.28 | 1.27 |
| 20.47 | PSAT1     | 17402893  | phosphoserine aminotransferase isoform 1                                           | Cytosolic | 10 | 1.24 | 0.14 | 1.14 | 1.27 | 0.21 | 1.14 |
| 20.44 | RPS3      | 15718687  | ribosomal protein S3                                                               | Cytosolic | 10 | 1.06 | 0.75 | 1.16 | 1.17 | 0.42 | 1.16 |
| 20.38 | XRCC6     | 4503841   | ATP-dependent DNA helicase II, 70 kDa subunit                                      | Cytosolic | 12 | 0.99 | 0.90 | 1.04 | 0.98 | 0.80 | 1.04 |
| 20.31 | FLNB      | 105990514 | filamin B, beta (actin binding protein 278)                                        | Cytosolic | 13 | 2.27 | 0.00 | 1.25 | 2.07 | 0.00 | 1.27 |
| 20.05 | ANXA5     | 4502107   | annexin 5                                                                          | Cytosolic | 11 | 1.92 | 0.00 | 1.14 | 2.05 | 0.00 | 1.11 |
| 19.75 | PABPC1    | 46367787  | poly(A) binding protein, cytoplasmic 1                                             | Cytosolic | 11 | 1.02 | 0.73 | 1.06 | 1.04 | 0.70 | 1.06 |
| 19.68 | ATIC      | 20127454  | 5-aminoimidazole-4-carboxamide ribonucleotide formyltransferase/IMP cyclohydrolase | Cytosolic | 9  | 0.84 | 0.50 | 1.19 | 0.73 | 0.18 | 1.19 |
| 19.64 | KPNB1     | 19923142  | karyopherin beta 1                                                                 | Cytosolic | 9  | 1.02 | 0.66 | 1.07 | 1.01 | 0.64 | 1.07 |
| 19.47 | RPL4      | 16579885  | ribosomal protein L4                                                               | Cytosolic | 9  | 1.38 | 0.11 | 1.17 | 1.13 | 0.28 | 1.17 |
| 19.19 | CAND1     | 21361794  | TIP120 protein                                                                     | Cytosolic | 8  | 0.72 | 0.13 | 1.25 | 0.70 | 0.18 | 1.21 |
| 19.18 | GART      | 4503915   | phosphoribosylglycinamide formyltransferase,                                       | Cytosolic | 11 | 0.97 | 0.88 | 1.05 | 0.97 | 0.92 | 1.05 |
| 19.17 | XPO1      | 4507943   | exportin 1                                                                         | Cytosolic | 9  | 0.98 | 0.94 | 1.05 | 1.02 | 0.66 | 1.05 |
| 19.12 | HNRNPA1   | 14043070  | heterogeneous nuclear ribonucleoprotein A1 isoform b                               | Cytosolic | 10 | 0.56 | 0.25 | 1.41 | 0.54 | 0.39 | 1.36 |
| 19.1  | LOC654188 | 113429184 | PREDICTED: similar to peptidylprolyl isomerase A isoform 1                         | Cytosolic | 9  | 0.90 | 0.65 | 1.13 | 0.77 | 0.50 | 1.18 |
| 19.06 | NAP1L1    | 4758756   | nucleosome assembly protein 1-like 1                                               | Cytosolic | 20 | 0.59 | 0.18 | 1.26 | 0.60 | 0.20 | 1.26 |
| 19.06 | ANXA2     | 50845388  | annexin A2 isoform 1                                                               | Cytosolic | 10 | 0.58 | 0.13 | 1.28 | 0.59 | 0.23 | 1.28 |
| 18.95 | ILF3      | 24234756  | interleukin enhancer binding factor 3 isoform c                                    | Cytosolic | 9  | 0.66 | 0.08 | 1.24 | 0.67 | 0.08 | 1.20 |
| 18.82 | MSN       | 4505257   | moesin                                                                             | Cytosolic | 9  | 0.77 | 0.40 | 1.27 | 0.77 | 0.40 | 1.27 |
| 18.62 | PLS3      | 7549809   | plastin 3                                                                          | Cytosolic | 9  | 1.46 | 0.25 | 1.27 | 1.69 | 0.10 | 1.32 |
| 18.33 | PDIA3     | 21361657  | protein disulfide isomerase-associated 3 precursor                                 | Cytosolic | 10 | 1.58 | 0.01 | 1.31 | 1.46 | 0.05 | 1.26 |
| 17.88 | GDI2      | 6598323   | GDP dissociation inhibitor 2                                                       | Cytosolic | 9  | 1.71 | 0.13 | 1.32 | 1.79 | 0.11 | 1.27 |
| 17.77 | CFL1      | 5031635   | cofilin 1 (non-muscle)                                                             | Cytosolic | 11 | 0.67 | 0.75 | 1.32 | 0.59 | 0.62 | 1.38 |
| 17.73 | BAT1      | 4758112   | HLA-B associated transcript 1                                                      | Cytosolic | 10 | 1.11 | 0.66 | 1.38 | 1.03 | 0.82 | 1.38 |
| 17.53 | HSPA1A    | 5123454   | heat shock 70kDa protein 1A                                                        | Cytosolic | 13 | 2.21 | 0.03 | 1.43 | 2.49 | 0.01 | 1.60 |
| 17.44 | GMPS      | 4504035   | guanine monophosphate synthetase                                                   | Cytosolic | 9  | 0.44 | 0.05 | 1.43 | 0.48 | 0.09 | 1.45 |
| 17.4  | PFN1      | 4826898   | profilin 1                                                                         | Cytosolic | 12 | 1.96 | 0.02 | 1.25 | 1.91 | 0.03 | 1.22 |
| 17.35 | CSE1L     | 29029559  | CSE1 chromosome segregation 1-like protein                                         | Cytosolic | 10 | 1.03 | 0.62 | 1.06 | 1.01 | 0.76 | 1.06 |
| 17.17 | HSPA4     | 38327039  | heat shock 70kDa protein 4 isoform a                                               | Cytosolic | 9  | 1.69 | 0.11 | 1.32 | 2.13 | 0.02 | 1.36 |
| 17.13 | AARS      | 109148542 | alanyl-tRNA synthetase                                                             | Cytosolic | 8  | 1.39 | 0.42 | 1.32 | 1.58 | 0.16 | 1.36 |
| 17.1  | UCHL1     | 21361091  | ubiquitin carboxyl-terminal esterase L1 (ubiquitin thiolesterase)                  | Cytosolic | 11 | 2.78 | 0.01 | 1.22 | 2.56 | 0.01 | 1.21 |
| 16.98 | RAN       | 5453555   | ras-related nuclear protein                                                        | Cytosolic | 10 | 0.82 | 0.95 | 1.19 | 0.90 | 0.92 | 1.15 |
| 16.92 | STRAP     | 20149592  | serine/threonine kinase receptor associated protein                                | Cytosolic | 9  | 0.35 | 0.00 | 1.49 | 0.33 | 0.00 | 1.51 |
| 16.91 | GSTP1     | 4504183   | glutathione transferase                                                            | Cytosolic | 14 | 1.29 | 0.40 | 1.31 | 1.08 | 0.61 | 1.25 |
| 16.85 | YARS      | 4507947   | tyrosyl-tRNA synthetase                                                            | Cytosolic | 7  | 0.92 | 0.42 | 1.08 | 0.93 | 0.31 | 1.09 |
| 16.81 | SSB       | 10835067  | autoantigen La                                                                     | Cytosolic | 9  | 1.02 | 0.97 | 1.05 | 1.02 | 0.86 | 1.05 |
| 16.63 | KRT18     | 4557888   | keratin 18                                                                         | Cytosolic | 9  | 0.38 | 0.03 | 1.72 | 0.47 | 0.03 | 1.53 |
| 16.51 | AKR1B1    | 4502049   | aldo-keto reductase family 1, member B1                                            | Cytosolic | 9  | 0.62 | 0.10 | 1.22 | 0.61 | 0.14 | 1.25 |
| 16.42 | PAICS     | 5453539   | phosphoribosylaminoimidazole carboxylase, 2                                        | Cytosolic | 9  | 1.57 | 0.55 | 1.29 | 1.29 | 0.84 | 1.27 |
| 16.4  | CAD       | 18105007  | carbamoylphosphate synthetase 2/aspartate transcarbamylase/dihydroorotase          | Cytosolic | 8  | 0.96 | 0.63 | 1.07 | 0.94 | 0.38 | 1.07 |
| 16.15 | HSPH1     | 42544159  | heat shock 105kd                                                                   | Cytosolic | 8  | 0.56 | 0.03 | 1.31 | 0.55 | 0.06 | 1.36 |
| 16.13 | TCP1      | 57863257  | T-complex protein 1 isoform a                                                      | Cytosolic | 8  | 0.95 | 0.54 | 1.07 | 0.95 | 0.72 | 1.07 |
| 16.06 | RPSA      | 9845502   | ribosomal protein SA                                                               | Cytosolic | 9  | 1.75 | 0.09 | 1.33 | 1.82 | 0.09 | 1.33 |
| 15.81 | EIF3M     | 23397429  | B5 receptor                                                                        | Cytosolic | 9  | 1.27 | 0.16 | 1.16 | 1.34 | 0.22 | 1.14 |
| 15.61 | LARS      | 108773810 | leucyl-tRNA synthetase                                                             | Cytosolic | 6  | 1.06 | 0.45 | 1.11 | 0.99 | 0.99 | 1.12 |
| 15.6  | HNRNPC    | 117190254 | heterogeneous nuclear ribonucleoprotein C isoform b                                | Cytosolic | 8  | 0.55 | 0.08 | 1.32 | 0.63 | 0.09 | 1.28 |

|       |           |           |                                                                             |           |    |      |      |      |      |      |      |
|-------|-----------|-----------|-----------------------------------------------------------------------------|-----------|----|------|------|------|------|------|------|
| 15.54 | MDH2      | 21735621  | mitochondrial malate dehydrogenase precursor                                | Cytosolic | 9  | 0.56 | 0.03 | 1.28 | 0.45 | 0.01 | 1.41 |
| 15.36 | HNRNPK    | 14165435  | heterogeneous nuclear ribonucleoprotein K isoform b                         | Cytosolic | 10 | 0.71 | 0.13 | 1.17 | 0.77 | 0.23 | 1.13 |
| 15.34 | DDB1      | 113422923 | PREDICTED: similar to DNA damage-binding protein 1                          | Cytosolic | 8  | 0.61 | 0.15 | 1.32 | 0.56 | 0.10 | 1.33 |
| 15.16 | CAP1      | 5453595   | adenylyl cyclase-associated protein                                         | Cytosolic | 8  | 0.90 | 0.49 | 1.09 | 0.90 | 0.53 | 1.09 |
| 15.14 | MCM7      | 33469968  | minichromosome maintenance protein 7 isoform 1                              | Cytosolic | 8  | 0.74 | 0.84 | 1.22 | 0.74 | 0.46 | 1.24 |
| 15.02 | DYNC1H1   | 33350932  | dynein, cytoplasmic, heavy polypeptide 1                                    | Cytosolic | 7  | 2.40 | 0.00 | 1.53 | 1.74 | 0.01 | 1.51 |
| 14.92 | NES       | 38176300  | nestin                                                                      | Cytosolic | 7  | 0.96 | 0.78 | 1.07 | 0.98 | 0.63 | 1.07 |
| 14.82 | SERPINH1  | 32454741  | serine (or cysteine) proteinase inhibitor, clade H, member 1 precursor      | Cytosolic | 8  | 0.99 | 0.91 | 1.07 | 0.99 | 0.96 | 1.07 |
| 14.49 | LDHA      | 5031857   | lactate dehydrogenase A                                                     | Cytosolic | 8  | 7.45 | 0.00 | 2.17 | 7.73 | 0.00 | 2.15 |
| 14.42 | SET       | 4506891   | SET translocation (myeloid leukemia-associated)                             | Cytosolic | 8  | 1.03 | 0.70 | 1.09 | 1.02 | 0.76 | 1.09 |
| 14.34 | CCT6A     | 4502643   | chaperonin containing TCP1, subunit 6A isoform a                            | Cytosolic | 7  | 0.71 | 0.44 | 1.21 | 0.78 | 0.50 | 1.20 |
| 14.29 | ACTN1     | 4501891   | actinin, alpha 1                                                            | Cytosolic | 13 | 2.13 | 0.04 | 1.31 | 2.13 | 0.04 | 1.28 |
| 14.09 | ANXA1     | 4502101   | annexin I                                                                   | Cytosolic | 6  | 2.33 | 0.01 | 1.19 | 2.25 | 0.02 | 1.24 |
| 14.09 | TRIM28    | 5032179   | tripartite motif-containing 28 protein                                      | Cytosolic | 8  | 2.99 | 0.00 | 1.46 | 2.96 | 0.00 | 1.47 |
| 14    | TALDO1    | 5803187   | transaldolase 1                                                             | Cytosolic | 6  | 1.92 | 0.03 | 1.33 | 1.91 | 0.04 | 1.34 |
| 13.93 | YWHAZ     | 4507953   | tyrosine 3/tryptophan 5 -monooxygenase activation protein, zeta polypeptide | Cytosolic | 14 | 1.85 | 0.09 | 1.33 | 1.82 | 0.17 | 1.33 |
| 13.8  | RPS9      | 14141193  | ribosomal protein S9                                                        | Cytosolic | 6  | 1.22 | 0.33 | 1.14 | 1.19 | 0.33 | 1.11 |
| 13.75 | P4HB      | 20070125  | prolyl 4-hydroxylase, beta subunit precursor                                | Cytosolic | 7  | 2.33 | 0.06 | 1.41 | 2.68 | 0.02 | 1.46 |
| 13.56 | TARS      | 38202255  | threonyl-tRNA synthetase                                                    | Cytosolic | 6  | 2.47 | 0.00 | 1.39 | 2.61 | 0.00 | 1.39 |
| 13.4  | HNRNPA2B1 | 4504447   | heterogeneous nuclear ribonucleoprotein A2/B1 isoform A2                    | Cytosolic | 11 | 0.47 | 0.05 | 1.27 | 0.44 | 0.03 | 1.37 |
| 13.4  | IGF2BP1   | 56237027  | insulin-like growth factor 2 mRNA binding protein 1                         | Cytosolic | 7  | 0.67 | 0.30 | 1.46 | 0.72 | 0.63 | 1.50 |
| 13.29 | TAGLN2    | 4507357   | transgelin 2                                                                | Cytosolic | 7  | 0.72 | 0.21 | 1.25 | 0.60 | 0.17 | 1.31 |
| 13.23 | CCT4      | 38455427  | chaperonin containing TCP1, subunit 4 (delta)                               | Cytosolic | 8  | 1.03 | 0.99 | 1.06 | 1.01 | 0.92 | 1.06 |
| 12.98 | PSMD11    | 28872725  | proteasome 26S non-ATPase subunit 11                                        | Cytosolic | 8  | 0.99 | 0.99 | 1.11 | 1.02 | 0.91 | 1.11 |
| 12.75 | ALDOA     | 4557305   | aldolase A                                                                  | Cytosolic | 5  | 1.07 | 0.50 | 1.08 | 1.07 | 0.62 | 1.08 |
| 12.74 | PGD       | 40068518  | phosphogluconate dehydrogenase                                              | Cytosolic | 7  | 2.31 | 0.02 | 1.49 | 2.03 | 0.04 | 1.42 |
| 12.74 | EIF3B     | 83367072  | eukaryotic translation initiation factor 3, subunit 9 eta, 116kDa           | Cytosolic | 6  | 0.94 | 0.56 | 1.09 | 0.93 | 0.50 | 1.09 |
| 12.71 | RPS3A     | 4506723   | ribosomal protein S3a                                                       | Cytosolic | 10 | 1.02 | 0.72 | 1.06 | 1.02 | 0.69 | 1.06 |
| 12.67 | G3BP1     | 5031703   | Ras-GTPase-activating protein SH3-domain-binding protein                    | Cytosolic | 6  | 1.16 | 0.54 | 1.16 | 1.34 | 0.36 | 1.13 |
| 12.64 | BCAT1     | 38176287  | branched chain aminotransferase 1, cytosolic                                | Cytosolic | 8  | 0.26 | 0.03 | 1.66 | 0.21 | 0.03 | 1.91 |
| 12.62 | YBX1      | 34098946  | nuclease sensitive element binding protein 1                                | Cytosolic | 7  | 1.00 | 0.94 | 1.10 | 1.06 | 0.52 | 1.10 |
| 12.6  | KIAA0368  | 122937211 | KIAA0368 protein                                                            | Cytosolic | 6  | 1.45 | 0.28 | 1.27 | 1.60 | 0.16 | 1.22 |
| 12.57 | GNB2L1    | 5174447   | guanine nucleotide binding protein (G protein), beta polypeptide 2-like 1   | Cytosolic | 5  | 2.01 | 0.04 | 1.29 | 2.01 | 0.04 | 1.29 |
| 12.51 | MCM2      | 33356547  | minichromosome maintenance protein 2                                        | Cytosolic | 6  | 1.05 | 0.39 | 1.09 | 0.98 | 0.97 | 1.09 |
| 12.47 | PPP2R1A   | 21361399  | alpha isoform of regulatory subunit A, protein phosphatase 2                | Cytosolic | 8  | 0.99 | 1.00 | 1.06 | 0.99 | 0.99 | 1.06 |
| 12.37 | IMPDH2    | 66933016  | inosine monophosphate dehydrogenase 2                                       | Cytosolic | 6  | 0.67 | 0.42 | 1.32 | 0.63 | 0.53 | 1.34 |
| 12.32 | LOC731751 | 113430845 | PREDICTED: similar to protein kinase, DNA-activated, catalytic polypeptide  | Cytosolic | 5  | 0.64 | 0.08 | 1.39 | 0.56 | 0.06 | 1.36 |
| 12.3  | HNRNPH1   | 5031753   | heterogeneous nuclear ribonucleoprotein H1                                  | Cytosolic | 6  | 0.64 | 0.30 | 1.34 | 0.61 | 0.30 | 1.36 |
| 12.14 | LIN28     | 13375938  | lin-28 homolog                                                              | Cytosolic | 8  | 0.58 | 0.17 | 1.27 | 0.63 | 0.19 | 1.25 |
| 12.04 | ADSS      | 34577063  | adenylosuccinate synthase                                                   | Cytosolic | 7  | 1.06 | 0.58 | 1.13 | 0.97 | 0.89 | 1.12 |
| 12.03 | LTA4H     | 4505029   | leukotriene A4 hydrolase                                                    | Cytosolic | 6  | 1.19 | 0.47 | 1.53 | 1.34 | 0.25 | 1.57 |
| 12.01 | EIF4G1    | 38201623  | eukaryotic translation initiation factor 4 gamma, 1 isoform 1               | Cytosolic | 5  | 0.97 | 0.51 | 1.16 | 0.97 | 0.62 | 1.12 |
| 12    | TUBB2A    | 4507729   | tubulin, beta 2                                                             | Cytosolic | 42 | 1.56 | 0.44 | 1.38 | 1.51 | 0.46 | 1.38 |
| 11.98 | DPYSL2    | 4503377   | dihydropyrimidinase-like 2                                                  | Cytosolic | 6  | 0.65 | 0.13 | 1.31 | 0.63 | 0.12 | 1.36 |
| 11.96 | WDR1      | 9257257   | WD repeat-containing protein 1 isoform 1                                    | Cytosolic | 8  | 1.14 | 0.50 | 1.10 | 1.25 | 0.17 | 1.11 |
| 11.91 | EIF3C     | 83700233  | eukaryotic translation initiation factor 3, subunit 8, 110kDa               | Cytosolic | 6  | 1.09 | 0.53 | 1.09 | 1.13 | 0.29 | 1.09 |
| 11.89 | PGM1      | 21361621  | phosphoglucomutase 1                                                        | Cytosolic | 4  | 0.53 | 0.09 | 1.71 | 0.46 | 0.13 | 1.98 |
| 11.88 | DNM1L     | 6996005   | dynamin 1-like protein isoform 1                                            | Cytosolic | 6  | 0.67 | 0.41 | 1.53 | 0.50 | 0.13 | 1.64 |
| 11.79 | PFKM      | 4505749   | phosphofructokinase, muscle                                                 | Cytosolic | 6  | 0.55 | 0.19 | 1.28 | 0.50 | 0.09 | 1.45 |
| 11.66 | PSMD1     | 25777600  | proteasome 26S non-ATPase subunit 1                                         | Cytosolic | 5  | 0.97 | 0.79 | 1.11 | 1.02 | 0.86 | 1.11 |
| 11.54 | EIF3I     | 4503513   | eukaryotic translation initiation factor 3, subunit 2 beta, 36kDa           | Cytosolic | 6  | 0.78 | 0.54 | 1.18 | 0.82 | 0.78 | 1.26 |
| 11.52 | LOC143244 | 89031353  | PREDICTED: similar to eukaryotic translation initiation factor 5A           | Cytosolic | 8  | 1.25 | 0.58 | 1.11 | 1.25 | 0.67 | 1.11 |
| 11.46 | RPS7      | 4506741   | ribosomal protein S7                                                        | Cytosolic | 6  | 1.41 | 0.40 | 1.22 | 1.37 | 0.24 | 1.25 |
| 11.27 | PDIA4     | 4758304   | protein disulfide isomerase-associated 4                                    | Cytosolic | 5  | 0.54 | 0.19 | 1.41 | 0.59 | 0.32 | 1.37 |
| 10.95 | GARS      | 116805340 | glycyl-tRNA synthetase                                                      | Cytosolic | 5  | 1.02 | 0.48 | 1.07 | 0.98 | 0.79 | 1.07 |
| 10.9  | IPO7      | 5453998   | importin 7                                                                  | Cytosolic | 6  | 0.67 | 0.34 | 1.33 | 0.58 | 0.25 | 1.38 |
| 10.7  | PYGB      | 21361370  | brain glycogen phosphorylase                                                | Cytosolic | 5  | 0.95 | 0.60 | 1.15 | 0.98 | 0.97 | 1.15 |
| 10.58 | MCM6      | 7427519   | minichromosome maintenance deficient 6                                      | Cytosolic | 6  | 0.77 | 0.51 | 1.28 | 0.72 | 0.53 | 1.27 |
| 10.54 | SF3B1     | 54112117  | splicing factor 3b, subunit 1 isoform 1                                     | Cytosolic | 5  | 0.63 | 0.13 | 1.39 | 0.54 | 0.11 | 1.46 |
| 10.54 | UBC       | 113423966 | PREDICTED: similar to Ubiquitin-63E CG11624-PA, isoform A                   | Cytosolic | 7  | 1.77 | 0.16 | 1.34 | 1.41 | 0.53 | 1.27 |
| 10.49 | MATR3     | 62750354  | matrin 3                                                                    | Cytosolic | 5  | 0.65 | 0.20 | 1.20 | 0.61 | 0.16 | 1.25 |

|       |           |           |                                                                          |           |    |      |      |      |      |      |      |
|-------|-----------|-----------|--------------------------------------------------------------------------|-----------|----|------|------|------|------|------|------|
| 10.48 | RPS16     | 4506691   | ribosomal protein S16                                                    | Cytosolic | 6  | 1.04 | 0.60 | 1.09 | 1.03 | 0.67 | 1.09 |
| 10.37 | OLA1      | 58761500  | GTP-binding protein PTD004 isoform 1                                     | Cytosolic | 5  | 0.96 | 0.99 | 1.13 | 0.96 | 0.80 | 1.12 |
| 10.23 | TPM3      | 24119203  | tropomyosin 3 isoform 2                                                  | Cytosolic | 7  | 0.92 | 0.58 | 1.10 | 0.92 | 0.66 | 1.10 |
| 10.22 | USO1      | 4505541   | vesicle docking protein p115                                             | Cytosolic | 6  | 1.33 | 0.17 | 1.18 | 1.24 | 0.24 | 1.24 |
| 10.22 | HNRNPA3   | 34740329  | heterogeneous nuclear ribonucleoprotein A3                               | Cytosolic | 7  | 0.74 | 0.59 | 2.09 | 0.68 | 0.51 | 2.09 |
| 10.18 | NARS      | 4758762   | asparaginyl-tRNA synthetase                                              | Cytosolic | 4  | 1.75 | 0.07 | 1.29 | 1.67 | 0.11 | 1.31 |
| 10.08 | CNDP2     | 8922699   | CNDP dipeptidase 2 (metallopeptidase M20 family)                         | Cytosolic | 5  | 1.61 | 0.13 | 1.34 | 1.74 | 0.13 | 1.33 |
| 10.05 | MCM4      | 33469919  | minichromosome maintenance protein 4                                     | Cytosolic | 5  | 1.01 | 0.91 | 1.25 | 0.95 | 0.57 | 1.25 |
| 10.04 | RUVBL1    | 4506753   | RuvB-like 1                                                              | Cytosolic | 5  | 1.16 | 0.48 | 1.10 | 1.17 | 0.35 | 1.10 |
| 10.04 | ILF2      | 24234747  | interleukin enhancer binding factor 2                                    | Cytosolic | 5  | 0.54 | 0.17 | 1.29 | 0.59 | 0.18 | 1.29 |
| 10.01 | RPL3      | 4506649   | ribosomal protein L3 isoform a                                           | Cytosolic | 5  | 1.25 | 0.27 | 1.14 | 1.29 | 0.23 | 1.14 |
| 10    | PTMA      | 21359860  | prothymosin, alpha (gene sequence 28)                                    | Cytosolic | 6  | 0.94 | 0.82 | 1.25 | 0.90 | 0.25 | 1.24 |
| 9.98  | DDX21     | 50659095  | DEAD (Asp-Glu-Ala-Asp) box polypeptide 21                                | Cytosolic | 4  | 1.10 | 0.46 | 1.27 | 1.16 | 0.22 | 1.21 |
| 9.95  | NPM1      | 10835063  | nucleophosmin 1 isoform 1                                                | Cytosolic | 11 | 0.59 | 0.73 | 1.53 | 0.82 | 0.76 | 1.24 |
| 9.88  | CLIC1     | 14251209  | chloride intracellular channel 1                                         | Cytosolic | 4  | 1.03 | 0.82 | 1.09 | 1.03 | 0.84 | 1.09 |
| 9.82  | PTGES3    | 23308579  | unactive progesterone receptor, 23 kD                                    | Cytosolic | 11 | 0.98 | 0.84 | 1.04 | 0.98 | 0.85 | 1.04 |
| 9.74  | PRDX2     | 32189392  | peroxiredoxin 2 isoform a                                                | Cytosolic | 4  | 0.39 | 0.03 | 1.39 | 0.44 | 0.03 | 1.39 |
| 9.72  | RPS8      | 4506743   | ribosomal protein S8                                                     | Cytosolic | 5  | 1.02 | 0.90 | 1.07 | 1.03 | 0.69 | 1.07 |
| 9.72  | RSL1D1    | 118498359 | ribosomal L1 domain containing 1                                         | Cytosolic | 5  | 0.69 | 0.26 | 1.24 | 0.67 | 0.17 | 1.16 |
| 9.7   | CRABP1    | 4758052   | cellular retinoic acid binding protein 1                                 | Cytosolic | 5  | 0.95 | 0.59 | 1.09 | 0.95 | 0.56 | 1.09 |
| 9.7   | DDX1      | 4826686   | DEAD (Asp-Glu-Ala-Asp) box polypeptide 1                                 | Cytosolic | 6  | 1.06 | 0.87 | 1.17 | 1.24 | 0.22 | 1.14 |
| 9.66  | HNRNPR    | 5031755   | heterogeneous nuclear ribonucleoprotein R                                | Cytosolic | 5  | 0.88 | 0.70 | 1.53 | 0.81 | 0.50 | 1.25 |
| 9.63  | DHX15     | 68509926  | DEAH (Asp-Glu-Ala-His) box polypeptide 15                                | Cytosolic | 5  | 0.86 | 0.29 | 1.11 | 0.87 | 0.51 | 1.11 |
| 9.6   | HNRNPM    | 14141152  | heterogeneous nuclear ribonucleoprotein M isoform a                      | Cytosolic | 4  | 0.92 | 0.55 | 1.10 | 0.90 | 0.36 | 1.09 |
| 9.47  | UGP2      | 48255968  | UDP-glucose pyrophosphorylase 2 isoform b                                | Cytosolic | 4  | 2.47 | 0.09 | 1.67 | 2.83 | 0.02 | 1.31 |
| 9.42  | CCT7      | 5453607   | chaperonin containing TCP1, subunit 7 isoform a                          | Cytosolic | 4  | 0.43 | 0.23 | 1.77 | 0.45 | 0.34 | 1.77 |
| 9.4   | YWHAQ     | 5803227   | tyrosine 3/tryptophan 5 -monooxygenase activation protein, theta         | Cytosolic | 10 | 0.61 | 0.37 | 1.28 | 0.50 | 0.27 | 1.37 |
| 9.35  | RPS4X     | 4506725   | ribosomal protein S4, X-linked X isoform                                 | Cytosolic | 5  | 0.98 | 0.99 | 1.08 | 0.96 | 0.85 | 1.08 |
| 9.33  | STMN1     | 5031851   | stathmin 1                                                               | Cytosolic | 5  | 0.50 | 0.14 | 1.58 | 0.52 | 0.17 | 1.64 |
| 9.28  | EIF3A     | 4503509   | eukaryotic translation initiation factor 3, subunit 10 theta, 150/170kDa | Cytosolic | 4  | 1.05 | 0.59 | 1.09 | 1.04 | 0.56 | 1.09 |
| 9.25  | TUBB3     | 50592996  | tubulin, beta, 4                                                         | Cytosolic | 26 | 0.71 | 0.57 | 1.20 | 0.57 | 0.47 | 1.28 |
| 9.24  | NSUN2     | 39995082  | NOL1/NOP2/Sun domain family 2 protein                                    | Cytosolic | 4  | 1.04 | 0.62 | 1.25 | 1.05 | 0.58 | 1.25 |
| 9.22  | RPL7A     | 4506661   | ribosomal protein L7a                                                    | Cytosolic | 5  | 1.09 | 0.41 | 1.12 | 1.05 | 0.50 | 1.13 |
| 9.22  | NONO      | 34932414  | non-POU domain containing, octamer-binding                               | Cytosolic | 5  | 0.95 | 0.79 | 1.16 | 1.05 | 0.79 | 1.20 |
| 9.21  | GFPT1     | 4503981   | glucosamine-fructose-6-phosphate aminotransferase                        | Cytosolic | 3  | 1.29 | 0.28 | 1.14 | 1.16 | 0.54 | 1.13 |
| 9.16  | PLEC1     | 47607492  | plectin 1 isoform 1                                                      | Cytosolic | 4  | 1.10 | 0.55 | 1.32 | 1.12 | 0.47 | 1.36 |
| 9.13  | ACLY      | 38569423  | ATP citrate lyase isoform 2                                              | Cytosolic | 4  | 1.29 | 0.17 | 1.24 | 1.34 | 0.14 | 1.25 |
| 9.08  | RPS13     | 4506685   | ribosomal protein S13                                                    | Cytosolic | 5  | 1.05 | 0.67 | 1.05 | 1.05 | 0.58 | 1.05 |
| 9.05  | IDH2      | 28178832  | isocitrate dehydrogenase 2 (NADP+), mitochondrial precursor              | Cytosolic | 5  | 0.33 | 0.01 | 1.58 | 0.32 | 0.00 | 1.61 |
| 9.04  | SFRS1     | 5902076   | splicing factor, arginine/serine-rich 1 isoform 1                        | Cytosolic | 5  | 0.56 | 0.18 | 1.38 | 0.61 | 0.27 | 1.41 |
| 9     | RPL23A    | 17105394  | ribosomal protein L23a                                                   | Cytosolic | 5  | 1.64 | 0.18 | 1.38 | 1.42 | 0.31 | 1.29 |
| 8.99  | HUWE1     | 61676188  | HECT, UBA and WWE domain containing 1                                    | Cytosolic | 4  | 0.90 | 0.22 | 1.15 | 0.91 | 0.20 | 1.15 |
| 8.94  | KARS      | 5031815   | lysyl-tRNA synthetase                                                    | Cytosolic | 3  | 1.06 | 0.47 | 1.10 | 1.05 | 0.63 | 1.09 |
| 8.88  | DARS      | 45439306  | aspartyl-tRNA synthetase                                                 | Cytosolic | 4  | 0.93 | 0.53 | 1.10 | 0.99 | 0.96 | 1.10 |
| 8.84  | CALR      | 4757900   | calreticulin precursor                                                   | Cytosolic | 4  | 1.47 | 0.38 | 1.33 | 1.91 | 0.47 | 1.39 |
| 8.77  | LOC650327 | 89039064  | PREDICTED: similar to 60S ribosomal protein L17 (L23) isoform 4          | Cytosolic | 5  | 1.29 | 0.58 | 1.32 | 1.46 | 0.59 | 1.28 |
| 8.75  | RARS      | 15149476  | arginyl-tRNA synthetase                                                  | Cytosolic | 4  | 1.06 | 0.40 | 1.14 | 1.03 | 0.54 | 1.14 |
| 8.74  | RPS10     | 4506679   | ribosomal protein S10                                                    | Cytosolic | 7  | 0.97 | 1.00 | 1.04 | 0.99 | 0.99 | 1.04 |
| 8.74  | MAGOHB    | 8922331   | mago-nashi homolog 2                                                     | Cytosolic | 5  | 0.26 | 0.03 | 1.72 | 0.25 | 0.04 | 1.72 |
| 8.63  | MDN1      | 24415404  | MDN1, midasin homolog                                                    | Cytosolic | 4  | 0.99 | 0.91 | 1.15 | 1.02 | 0.98 | 1.19 |
| 8.59  | PPP2R2A   | 4506019   | alpha isoform of regulatory subunit B55, protein phosphatase 2           | Cytosolic | 4  | 0.96 | 0.81 | 1.09 | 0.95 | 0.63 | 1.09 |
| 8.58  | PFAS      | 31657129  | phosphoribosylformylglycinamide synthase                                 | Cytosolic | 4  | 2.21 | 0.06 | 1.54 | 2.29 | 0.05 | 1.42 |
| 8.57  | CBS       | 4557415   | cystathionine-beta-synthase                                              | Cytosolic | 4  | 1.45 | 0.21 | 1.15 | 1.47 | 0.20 | 1.16 |
| 8.57  | NPEPPS    | 15451907  | aminopeptidase puromycin sensitive                                       | Cytosolic | 4  | 1.01 | 0.90 | 1.14 | 0.99 | 0.96 | 1.14 |
| 8.51  | HSPA9     | 24234688  | heat shock 70kDa protein 9B precursor                                    | Cytosolic | 4  | 1.01 | 0.77 | 1.16 | 1.03 | 0.64 | 1.15 |
| 8.47  | USP7      | 4507857   | ubiquitin specific protease 7 (herpes virus-associated)                  | Cytosolic | 3  | 1.17 | 0.74 | 2.09 | 0.93 | 0.90 | 2.09 |
| 8.47  | ACAT2     | 5174389   | acetyl-Coenzyme A acetyltransferase 2                                    | Cytosolic | 4  | 0.84 | 0.65 | 1.31 | 0.72 | 0.45 | 1.33 |
| 8.47  | ASNA1     | 50428938  | arsA arsenite transporter, ATP-binding, homolog 1                        | Cytosolic | 4  | 0.94 | 0.88 | 1.18 | 0.92 | 0.64 | 1.12 |
| 8.44  | SNRNP200  | 40217847  | activating signal cointegrator 1 complex subunit 3-like 1                | Cytosolic | 4  | 0.63 | 0.18 | 1.64 | 0.41 | 0.06 | 1.84 |
| 8.44  | RPL6      | 67189747  | ribosomal protein L6                                                     | Cytosolic | 6  | 1.46 | 0.48 | 1.57 | 1.29 | 0.64 | 1.47 |
| 8.42  | RPS15A    | 71772415  | ribosomal protein S15a                                                   | Cytosolic | 4  | 1.33 | 0.69 | 1.21 | 1.39 | 0.63 | 1.20 |

|      |           |           |                                                                  |           |    |      |      |      |      |      |      |
|------|-----------|-----------|------------------------------------------------------------------|-----------|----|------|------|------|------|------|------|
| 8.34 | PRPS1     | 4506127   | phosphoribosyl pyrophosphate synthetase 1                        | Cytosolic | 3  | 0.33 | 0.62 | 1.74 | 0.36 | 0.63 | 1.61 |
| 8.29 | ANP32B    | 5454088   | acidic (leucine-rich) nuclear phosphoprotein 32 family, member B | Cytosolic | 4  | 0.64 | 0.20 | 1.75 | 0.50 | 0.13 | 1.60 |
| 8.29 | HIST2H4B  | 77539758  | histone cluster 2, H4b                                           | Cytosolic | 4  | 1.50 | 0.31 | 1.17 | 1.54 | 0.28 | 1.18 |
| 8.22 | FARSB     | 124028525 | phenylalanyl-tRNA synthetase, beta subunit                       | Cytosolic | 4  | 0.94 | 0.67 | 1.08 | 0.94 | 0.57 | 1.08 |
| 8.17 | PSMD13    | 28872728  | proteasome 26S non-ATPase subunit 13 isoform 1                   | Cytosolic | 4  | 0.91 | 0.56 | 1.11 | 1.01 | 0.93 | 1.11 |
| 8.17 | ASNS      | 34452703  | asparagine synthetase                                            | Cytosolic | 4  | 2.51 | 0.03 | 1.51 | 2.40 | 0.04 | 1.53 |
| 8.16 | QPRT      | 45269149  | quinolinate phosphoribosyltransferase                            | Cytosolic | 4  | 0.75 | 0.19 | 1.94 | 0.44 | 0.32 | 2.31 |
| 8.16 | IARS      | 94721241  | isoleucine-tRNA synthetase                                       | Cytosolic | 4  | 0.97 | 0.72 | 1.12 | 1.02 | 0.81 | 1.12 |
| 8.15 | MCM3      | 6631095   | minichromosome maintenance protein 3                             | Cytosolic | 4  | 0.95 | 0.78 | 1.12 | 1.00 | 0.89 | 1.12 |
| 8.14 | PPP2CA    | 4506017   | protein phosphatase 2, catalytic subunit, alpha isoform          | Cytosolic | 4  | 1.00 | 0.80 | 1.10 | 1.02 | 0.74 | 1.10 |
| 8.14 | ACTC1     | 4885049   | cardiac muscle alpha actin 1 proprotein                          | Cytosolic | 29 | 9.20 | 0.00 | 1.56 | 9.82 | 0.00 | 1.56 |
| 8.1  | PPIB      | 4758950   | peptidylprolyl isomerase B precursor                             | Cytosolic | 4  | 1.03 | 0.60 | 1.12 | 1.01 | 0.75 | 1.12 |
| 8.09 | TUFM      | 34147630  | Tu translation elongation factor, mitochondrial                  | Cytosolic | 4  | 0.63 | 0.20 | 1.61 | 0.46 | 0.16 | 1.58 |
| 8.08 | RBBP7     | 4506439   | retinoblastoma binding protein 7                                 | Cytosolic | 4  | 0.50 | 0.08 | 1.37 | 0.41 | 0.07 | 1.43 |
| 8.06 | EEF1G     | 4503481   | eukaryotic translation elongation factor 1 gamma                 | Cytosolic | 4  | 2.13 | 0.14 | 1.33 | 2.17 | 0.14 | 1.37 |
| 8.06 | TAGLN     | 48255907  | transgelin                                                       | Cytosolic | 4  | 3.66 | 0.01 | 1.42 | 3.56 | 0.01 | 1.42 |
| 8.03 | LOC652826 | 89064750  | PREDICTED: similar to 26S protease regulatory subunit 6B         | Cytosolic | 3  | 1.05 | 0.71 | 1.14 | 1.05 | 0.66 | 1.14 |
| 8.02 | CSNK2A1   | 4503095   | casein kinase II alpha 1 subunit isoform a                       | Cytosolic | 4  | 0.63 | 0.64 | 1.58 | 0.40 | 0.33 | 1.87 |
| 8.02 | PDIA6     | 5031973   | protein disulfide isomerase-associated 6                         | Cytosolic | 4  | 0.93 | 0.83 | 1.11 | 1.02 | 0.73 | 1.13 |
| 8.02 | LOC440055 | 89034991  | PREDICTED: similar to ribosomal protein S12                      | Cytosolic | 5  | 1.38 | 0.45 | 1.13 | 1.22 | 0.51 | 1.12 |
| 8.01 | PSMC6     | 24430160  | proteasome 26S ATPase subunit 6                                  | Cytosolic | 5  | 1.01 | 0.76 | 1.10 | 1.01 | 0.68 | 1.10 |
| 7.99 | MARS      | 14043022  | methionine-tRNA synthetase                                       | Cytosolic | 3  | 1.04 | 0.86 | 1.25 | 1.04 | 0.96 | 1.27 |
| 7.97 | PYGL      | 71037379  | glycogen phosphorylase, liver                                    | Cytosolic | 3  | 1.00 | 0.78 | 1.11 | 1.02 | 0.66 | 1.12 |
| 7.77 | CKB       | 21536286  | brain creatine kinase                                            | Cytosolic | 3  | 2.25 | 0.08 | 1.36 | 2.33 | 0.05 | 1.37 |
| 7.72 | RPL5      | 14591909  | ribosomal protein L5                                             | Cytosolic | 4  | 1.06 | 0.56 | 1.18 | 1.01 | 0.87 | 1.18 |
| 7.7  | PRPSAP2   | 4506133   | phosphoribosyl pyrophosphate synthetase-associated protein 2     | Cytosolic | 4  | 0.90 | 0.60 | 1.12 | 0.90 | 0.69 | 1.11 |
| 7.7  | RPL24     | 4506619   | ribosomal protein L24                                            | Cytosolic | 4  | 1.05 | 0.87 | 1.09 | 1.03 | 0.91 | 1.09 |
| 7.69 | AASS      | 13027640  | aminoadipate-semialdehyde synthase                               | Cytosolic | 4  | 2.96 | 0.17 | 2.03 | 2.58 | 0.10 | 2.03 |
| 7.67 | ADAR      | 70166852  | adenosine deaminase, RNA-specific isoform a                      | Cytosolic | 4  | 0.86 | 0.41 | 1.32 | 0.81 | 0.23 | 1.24 |
| 7.64 | GOT1      | 4504067   | aspartate aminotransferase 1                                     | Cytosolic | 4  | 1.25 | 0.24 | 1.18 | 1.17 | 0.28 | 1.28 |
| 7.64 | NUDC      | 5729953   | nuclear distribution gene C homolog                              | Cytosolic | 4  | 0.66 | 0.28 | 1.18 | 0.63 | 0.28 | 1.19 |
| 7.63 | RPS19     | 4506695   | ribosomal protein S19                                            | Cytosolic | 3  | 1.01 | 0.99 | 1.08 | 1.04 | 0.88 | 1.08 |
| 7.63 | CALM1     | 5901912   | calmodulin 1                                                     | Cytosolic | 4  | 1.06 | 0.53 | 1.18 | 1.00 | 0.63 | 1.18 |
| 7.61 | GLO1      | 118402586 | glyoxalase I                                                     | Cytosolic | 3  | 1.24 | 0.46 | 1.24 | 1.33 | 0.36 | 1.18 |
| 7.59 | PSMD12    | 4506221   | proteasome 26S non-ATPase subunit 12                             | Cytosolic | 4  | 2.88 | 0.37 | 1.77 | 2.65 | 0.43 | 1.72 |
| 7.57 | ADH5      | 71565154  | class III alcohol dehydrogenase 5 chi subunit                    | Cytosolic | 3  | 1.45 | 0.13 | 1.46 | 1.41 | 0.14 | 1.39 |
| 7.53 | RPLP0     | 4506667   | ribosomal protein P0                                             | Cytosolic | 4  | 1.08 | 0.45 | 1.10 | 1.09 | 0.43 | 1.10 |
| 7.53 | CSDA      | 20070160  | cold shock domain protein A                                      | Cytosolic | 6  | 0.84 | 0.33 | 1.25 | 0.86 | 0.39 | 1.33 |
| 7.53 | SEPHS1    | 24797148  | selenophosphate synthetase                                       | Cytosolic | 4  | 2.05 | 0.37 | 1.32 | 2.11 | 0.36 | 1.27 |
| 7.52 | RPL10A    | 15431288  | ribosomal protein L10a                                           | Cytosolic | 5  | 1.46 | 0.43 | 1.20 | 1.51 | 0.24 | 1.18 |
| 7.48 | DDX5      | 4758138   | DEAD (Asp-Glu-Ala-Asp) box polypeptide 5                         | Cytosolic | 7  | 0.94 | 0.88 | 1.19 | 0.77 | 0.59 | 1.21 |
| 7.46 | RPL13     | 15431297  | ribosomal protein L13                                            | Cytosolic | 4  | 1.32 | 0.52 | 1.15 | 1.41 | 0.40 | 1.16 |
| 7.44 | RPL7      | 15431301  | ribosomal protein L7                                             | Cytosolic | 3  | 1.85 | 0.08 | 1.36 | 1.80 | 0.13 | 1.28 |
| 7.43 | PPP1CA    | 56790945  | protein phosphatase 1, catalytic subunit, alpha isoform 3        | Cytosolic | 3  | 0.95 | 0.62 | 1.14 | 0.95 | 0.58 | 1.14 |
| 7.42 | PFKP      | 11321601  | phosphofructokinase, platelet                                    | Cytosolic | 4  | 3.40 | 0.04 | 1.53 | 3.47 | 0.04 | 1.53 |
| 7.37 | PRPF8     | 91208426  | U5 snRNP-specific protein                                        | Cytosolic | 3  | 0.86 | 0.33 | 1.18 | 0.84 | 0.23 | 1.19 |
| 7.28 | KNPA2     | 4504897   | karyopherin alpha 2                                              | Cytosolic | 3  | 1.29 | 0.39 | 1.42 | 1.39 | 0.41 | 1.21 |
| 7.27 | SF3B3     | 54112121  | splicing factor 3b, subunit 3                                    | Cytosolic | 4  | 0.83 | 0.18 | 1.24 | 0.86 | 0.28 | 1.25 |
| 7.26 | PRPF19    | 7657381   | PRP19/PSO4 pre-mRNA processing factor 19 homolog                 | Cytosolic | 3  | 0.77 | 0.15 | 1.38 | 0.79 | 0.20 | 1.39 |
| 7.23 | HNRNPD    | 14110420  | heterogeneous nuclear ribonucleoprotein D isoform a              | Cytosolic | 3  | 0.72 | 0.42 | 1.17 | 0.72 | 0.39 | 1.16 |
| 7.15 | ARF4      | 4502205   | ADP-ribosylation factor 4                                        | Cytosolic | 4  | 1.03 | 0.85 | 1.14 | 0.99 | 0.97 | 1.14 |
| 7.15 | RPL10     | 5174431   | ribosomal protein L10                                            | Cytosolic | 3  | 1.80 | 0.17 | 1.28 | 1.72 | 0.22 | 1.27 |
| 7.13 | PCNA      | 4505641   | proliferating cell nuclear antigen                               | Cytosolic | 4  | 0.82 | 0.30 | 1.20 | 0.80 | 0.33 | 1.15 |
| 7.13 | GSTO1     | 4758484   | glutathione-S-transferase omega 1                                | Cytosolic | 3  | 0.89 | 0.74 | 1.18 | 0.90 | 0.66 | 1.18 |
| 7.09 | ST13      | 19923193  | heat shock 70kD protein binding protein                          | Cytosolic | 4  | 1.56 | 0.24 | 1.33 | 1.14 | 0.33 | 1.27 |
| 6.99 | MYH10     | 41406064  | myosin, heavy polypeptide 10, non-muscle                         | Cytosolic | 3  | 1.12 | 0.63 | 1.14 | 1.03 | 0.87 | 1.14 |
| 6.97 | LOC653232 | 88998868  | PREDICTED: similar to ribosomal protein L15 isoform 4            | Cytosolic | 3  | 1.49 | 0.36 | 1.17 | 1.36 | 0.34 | 1.21 |
| 6.96 | PARK7     | 31543380  | DJ-1 protein                                                     | Cytosolic | 3  | 1.82 | 0.36 | 1.29 | 1.87 | 0.39 | 1.29 |
| 6.94 | PSMC5     | 24497435  | proteasome 26S ATPase subunit 5                                  | Cytosolic | 3  | 0.92 | 0.32 | 1.16 | 1.01 | 0.83 | 1.15 |
| 6.93 | APEX1     | 18375505  | APEX nuclease                                                    | Cytosolic | 3  | 1.71 | 0.49 | 1.58 | 2.29 | 0.22 | 1.43 |
| 6.92 | TXN       | 50592994  | thioredoxin                                                      | Cytosolic | 3  | 1.77 | 0.28 | 1.31 | 1.69 | 0.50 | 1.31 |

|      |           |           |                                                                          |           |   |      |      |      |      |      |      |
|------|-----------|-----------|--------------------------------------------------------------------------|-----------|---|------|------|------|------|------|------|
| 6.89 | PA2G4     | 124494254 | ErbB3-binding protein 1                                                  | Cytosolic | 3 | 0.97 | 0.64 | 1.10 | 0.95 | 0.77 | 1.10 |
| 6.88 | RANGAP1   | 4506411   | Ran GTPase activating protein 1                                          | Cytosolic | 3 | 1.04 | 0.63 | 1.14 | 1.01 | 0.68 | 1.14 |
| 6.84 | RBMX      | 56699409  | RNA binding motif protein, X-linked                                      | Cytosolic | 3 | 0.90 | 0.45 | 1.18 | 0.95 | 0.85 | 1.21 |
| 6.83 | TCOF1     | 57164977  | Treacher Collins-Franceschetti syndrome 1 isoform a                      | Cytosolic | 4 | 0.47 | 0.48 | 1.87 | 1.14 | 0.94 | 1.41 |
| 6.83 | LOC653737 | 89040203  | PREDICTED: similar to ribosomal protein L21                              | Cytosolic | 4 | 1.14 | 0.65 | 1.15 | 1.20 | 0.55 | 1.15 |
| 6.81 | LRPPRC    | 31621305  | leucine-rich PPR motif-containing protein                                | Cytosolic | 3 | 0.92 | 0.49 | 1.11 | 0.91 | 0.47 | 1.12 |
| 6.81 | DDX3X     | 87196351  | DEAD/H (Asp-Glu-Ala-Asp/His) box polypeptide 3                           | Cytosolic | 4 | 1.00 | 0.98 | 1.09 | 0.95 | 0.40 | 1.08 |
| 6.8  | GSPT2     | 46094014  | peptide chain release factor 3                                           | Cytosolic | 2 | 1.08 | 0.53 | 1.18 | 1.02 | 0.86 | 1.18 |
| 6.77 | MAT2A     | 5174529   | methionine adenosyltransferase II, alpha                                 | Cytosolic | 3 | 1.09 | 0.61 | 1.14 | 1.11 | 0.46 | 1.14 |
| 6.76 | RPS2      | 15055539  | ribosomal protein S2                                                     | Cytosolic | 4 | 1.02 | 0.85 | 1.07 | 1.06 | 0.68 | 1.07 |
| 6.71 | SNRPB     | 4507125   | small nuclear ribonucleoprotein polypeptide B/B' isoform B               | Cytosolic | 3 | 0.77 | 0.85 | 1.32 | 0.71 | 0.41 | 1.24 |
| 6.71 | NT5C2     | 6912598   | 5'-nucleotidase, cytosolic II                                            | Cytosolic | 3 | 1.20 | 0.71 | 2.09 | 1.11 | 0.83 | 2.09 |
| 6.7  | CASP3     | 14790119  | caspase 3 preproprotein                                                  | Cytosolic | 3 | 5.40 | 0.03 | 1.72 | 5.06 | 0.04 | 1.51 |
| 6.69 | LAP3      | 41393561  | leucine aminopeptidase 3                                                 | Cytosolic | 3 | 0.98 | 0.95 | 1.50 | 0.94 | 0.76 | 1.82 |
| 6.68 | KHSRP     | 4504865   | KH-type splicing regulatory protein (FUSE binding protein 2)             | Cytosolic | 3 | 0.76 | 0.21 | 1.38 | 0.72 | 0.15 | 1.38 |
| 6.68 | LRRCA7    | 24308207  | leucine rich repeat containing 47                                        | Cytosolic | 4 | 1.08 | 0.33 | 1.26 | 1.11 | 0.31 | 1.18 |
| 6.63 | CACYBP    | 7656952   | calyculin binding protein isoform 1                                      | Cytosolic | 3 | 0.50 | 0.15 | 1.31 | 0.45 | 0.12 | 1.36 |
| 6.62 | FABP5     | 4557581   | fatty acid binding protein 5 (psoriasis-associated)                      | Cytosolic | 3 | 2.81 | 0.03 | 1.36 | 3.02 | 0.03 | 1.38 |
| 6.62 | MTHFD1    | 13699868  | methylenetetrahydrofolate dehydrogenase 1                                | Cytosolic | 2 | 2.25 | 0.04 | 1.32 | 2.29 | 0.03 | 1.32 |
| 6.59 | PSMD3     | 25777612  | proteasome 26S non-ATPase subunit 3                                      | Cytosolic | 3 | 0.95 | 0.55 | 1.09 | 0.96 | 0.74 | 1.09 |
| 6.57 | IQGAP1    | 4506787   | IQ motif containing GTPase activating protein 1                          | Cytosolic | 4 | 1.60 | 0.25 | 1.20 | 1.64 | 0.23 | 1.26 |
| 6.57 | EIF3L     | 7705433   | eukaryotic translation initiation factor 3 subunit 6 interacting protein | Cytosolic | 3 | 1.06 | 0.96 | 1.14 | 1.08 | 0.74 | 1.14 |
| 6.49 | PSMA3     | 4506183   | proteasome alpha 3 subunit isoform 1                                     | Cytosolic | 3 | 0.95 | 0.78 | 1.25 | 1.03 | 0.83 | 1.25 |
| 6.49 | KRT1      | 119395750 | keratin 1                                                                | Cytosolic | 3 | 2.27 | 0.15 | 1.41 | 1.46 | 0.35 | 1.56 |
| 6.48 | TNPO3     | 6912734   | transportin 3                                                            | Cytosolic | 3 | 0.75 | 0.57 | 2.51 | 0.66 | 0.45 | 2.09 |
| 6.47 | MCM5      | 23510448  | minichromosome maintenance deficient protein 5                           | Cytosolic | 3 | 0.95 | 0.78 | 1.25 | 0.93 | 0.67 | 1.31 |
| 6.45 | PCBP2     | 14141168  | poly(rC)-binding protein 2 isoform a                                     | Cytosolic | 3 | 0.99 | 0.94 | 1.18 | 0.95 | 0.90 | 1.18 |
| 6.42 | DPYSL3    | 4503379   | dihydropyrimidinase-like 3                                               | Cytosolic | 3 | 1.14 | 0.51 | 1.60 | 1.15 | 0.50 | 1.72 |
| 6.42 | HDLBP     | 4885409   | high density lipoprotein binding protein                                 | Cytosolic | 4 | 1.02 | 0.83 | 1.25 | 1.07 | 0.54 | 1.24 |
| 6.36 | SFPQ      | 4826998   | splicing factor proline/glutamine rich                                   | Cytosolic | 4 | 0.97 | 0.84 | 1.18 | 0.95 | 0.38 | 1.18 |
| 6.31 | CYCS      | 11128019  | cytochrome c                                                             | Cytosolic | 3 | 1.00 | 0.88 | 1.11 | 1.01 | 0.87 | 1.11 |
| 6.3  | EZR       | 21614499  | villin 2                                                                 | Cytosolic | 8 | 4.29 | 0.02 | 1.50 | 4.13 | 0.02 | 1.49 |
| 6.29 | CNN3      | 4502923   | calponin 3                                                               | Cytosolic | 3 | 0.90 | 0.72 | 1.15 | 0.94 | 0.90 | 1.20 |
| 6.29 | HMGBl     | 4504425   | high-mobility group box 1                                                | Cytosolic | 3 | 3.98 | 0.19 | 1.92 | 3.70 | 0.20 | 1.92 |
| 6.29 | SKIV2L2   | 39930353  | superkiller viralicidic activity 2-like 2                                | Cytosolic | 3 | 1.03 | 0.99 | 1.15 | 1.00 | 0.96 | 1.14 |
| 6.27 | PSMC2     | 4506209   | proteasome 26S ATPase subunit 2                                          | Cytosolic | 3 | 0.94 | 0.83 | 1.18 | 0.96 | 0.95 | 1.18 |
| 6.25 | LOC401206 | 88988836  | PREDICTED: similar to 40S ribosomal protein S25                          | Cytosolic | 3 | 0.98 | 0.85 | 1.14 | 0.99 | 0.86 | 1.14 |
| 6.23 | HSPB1     | 4504517   | heat shock 27kDa protein 1                                               | Cytosolic | 5 | 0.11 | 0.18 | 2.09 | 0.15 | 0.19 | 1.75 |
| 6.22 | CTPS      | 4503133   | CTP synthase                                                             | Cytosolic | 6 | 0.64 | 0.55 | 1.54 | 0.73 | 0.73 | 1.66 |
| 6.18 | TNPO1     | 23510381  | transportin 1                                                            | Cytosolic | 3 | 0.98 | 0.99 | 2.09 | 0.79 | 0.68 | 2.09 |
| 6.17 | LOC389435 | 88999528  | PREDICTED: similar to 60S ribosomal protein L27a                         | Cytosolic | 2 | 1.21 | 0.36 | 1.15 | 1.18 | 0.51 | 1.15 |
| 6.13 | ARPC2     | 5031599   | actin related protein 2/3 complex subunit 2                              | Cytosolic | 3 | 1.34 | 0.20 | 1.41 | 1.31 | 0.38 | 1.46 |
| 6.12 | TPM4      | 4507651   | tropomyosin 4                                                            | Cytosolic | 6 | 1.28 | 0.58 | 1.18 | 1.21 | 0.67 | 1.18 |
| 6.12 | SERPINB9  | 4758906   | serine (or cysteine) proteinase inhibitor, clade B (ovalbumin), member 9 | Cytosolic | 3 | 5.40 | 0.01 | 1.74 | 4.97 | 0.01 | 1.77 |
| 6.11 | KIAA1967  | 40548408  | p30 DBC protein                                                          | Cytosolic | 3 | 0.55 | 0.36 | 1.47 | 0.47 | 0.32 | 1.26 |
| 6.1  | CALU      | 4502551   | calumenin precursor                                                      | Cytosolic | 3 | 0.74 | 0.34 | 2.65 | 0.80 | 0.52 | 2.33 |
| 6.09 | PTBP1     | 4506243   | polypyrimidine tract-binding protein 1 isoform a                         | Cytosolic | 3 | 1.02 | 0.96 | 1.38 | 1.01 | 0.98 | 1.38 |
| 6.09 | PSMA5     | 23110942  | proteasome alpha 5 subunit                                               | Cytosolic | 3 | 1.11 | 0.62 | 1.10 | 1.08 | 0.65 | 1.11 |
| 6.08 | SND1      | 77404397  | staphylococcal nuclease domain containing 1                              | Cytosolic | 4 | 1.11 | 0.75 | 1.14 | 1.05 | 0.88 | 1.14 |
| 6.07 | GPX1      | 41406084  | glutathione peroxidase 1 isoform 1                                       | Cytosolic | 3 | 0.98 | 0.89 | 3.56 | 0.92 | 0.59 | 2.09 |
| 6.06 | FUS       | 4826734   | fusion (involved in t(12;16) in malignant liposarcoma) isoform a         | Cytosolic | 3 | 0.56 | 0.31 | 1.27 | 0.51 | 0.23 | 1.34 |
| 6.06 | PRDX5     | 6912238   | peroxiredoxin 5 precursor, isoform a                                     | Cytosolic | 3 | 0.98 | 0.90 | 1.15 | 0.97 | 0.92 | 1.17 |
| 6.06 | GPI       | 18201905  | glucose phosphate isomerase                                              | Cytosolic | 4 | 1.13 | 0.66 | 1.72 | 1.29 | 0.63 | 1.25 |
| 6.06 | XPO7      | 22095351  | exportin 7                                                               | Cytosolic | 3 | 0.92 | 0.63 | 1.31 | 0.90 | 0.70 | 1.26 |
| 6.05 | YWHAG     | 21464101  | 14-3-3, gamma                                                            | Cytosolic | 8 | 1.03 | 0.87 | 1.25 | 1.01 | 0.87 | 1.25 |
| 6.04 | G6PD      | 109389365 | glucose-6-phosphate dehydrogenase isoform a                              | Cytosolic | 3 | 1.61 | 0.24 | 1.27 | 1.57 | 0.31 | 1.26 |
| 6.03 | NACA      | 5031931   | nascent-polypeptide-associated complex alpha polypeptide                 | Cytosolic | 3 | 1.42 | 0.21 | 1.25 | 1.47 | 0.23 | 1.26 |
| 6.02 | ARL3      | 4757774   | ADP-ribosylation factor-like 3                                           | Cytosolic | 3 | 0.98 | 0.87 | 1.20 | 1.00 | 0.70 | 1.26 |
| 6.02 | ANP32E    | 13569879  | acidic (leucine-rich) nuclear phosphoprotein 32 family, member E         | Cytosolic | 3 | 0.54 | 0.40 | 1.54 | 0.67 | 0.55 | 1.64 |
| 6.01 | RPLP2     | 4506671   | ribosomal protein P2                                                     | Cytosolic | 3 | 1.09 | 0.58 | 1.09 | 1.07 | 0.69 | 1.09 |
| 6.01 | HEATR2    | 31377744  | HEAT repeat containing 2                                                 | Cytosolic | 3 | 0.99 | 0.98 | 1.25 | 0.94 | 0.66 | 1.27 |

|      |           |          |                                                                             |           |    |       |      |      |       |      |      |
|------|-----------|----------|-----------------------------------------------------------------------------|-----------|----|-------|------|------|-------|------|------|
| 6.01 | RPS14     | 68160922 | ribosomal protein S14                                                       | Cytosolic | 3  | 1.03  | 0.75 | 1.14 | 1.02  | 0.66 | 1.14 |
| 6.01 | SFRS7     | 72534660 | splicing factor, arginine/serine-rich 7                                     | Cytosolic | 3  | 0.67  | 0.50 | 2.11 | 0.78  | 0.65 | 2.11 |
| 6    | MIF       | 4505185  | macrophage migration inhibitory factor (glycosylation-inhibiting factor)    | Cytosolic | 3  | 1.49  | 0.24 | 1.20 | 1.50  | 0.26 | 1.21 |
| 6    | RPS24     | 4506703  | ribosomal protein S24 isoform c                                             | Cytosolic | 3  | 1.04  | 0.74 | 1.11 | 0.99  | 0.96 | 1.11 |
| 6    | PCBP1     | 5453854  | poly(rC) binding protein 1                                                  | Cytosolic | 3  | 1.39  | 0.51 | 1.25 | 1.53  | 0.44 | 1.25 |
| 6    | PSMD6     | 7661914  | proteasome (prosome, macropain) 26S subunit, non-ATPase, 6                  | Cytosolic | 3  | 0.95  | 0.87 | 1.08 | 0.99  | 0.95 | 1.07 |
| 6    | SARS      | 16306548 | seryl-tRNA synthetase                                                       | Cytosolic | 3  | 1.39  | 0.31 | 1.25 | 1.21  | 0.54 | 1.25 |
| 6    | TUBB      | 29788785 | tubulin, beta polypeptide                                                   | Cytosolic | 42 | 0.67  | 0.73 | 1.21 | 0.72  | 0.73 | 1.18 |
| 6    | IGF2BP3   | 30795212 | insulin-like growth factor 2 mRNA binding protein 3                         | Cytosolic | 4  | 0.85  | 0.54 | 1.18 | 0.87  | 0.69 | 1.20 |
| 6    | PTPN11    | 33356177 | protein tyrosine phosphatase, non-receptor type 11                          | Cytosolic | 3  | 1.00  | 0.99 | 1.19 | 0.97  | 0.95 | 1.16 |
| 6    | TXNDC5    | 42794771 | thioredoxin domain containing 5 isoform 1                                   | Cytosolic | 3  | 0.97  | 0.88 | 1.25 | 1.04  | 0.93 | 1.25 |
| 6    | LOC644166 | 88980535 | PREDICTED: similar to 40S ribosomal protein S26                             | Cytosolic | 4  | 1.03  | 0.81 | 1.13 | 0.94  | 0.80 | 1.12 |
| 5.96 | QARS      | 4826960  | glutamyl-tRNA synthetase                                                    | Cytosolic | 3  | 1.09  | 0.59 | 1.38 | 1.06  | 0.70 | 1.38 |
| 5.96 | PRMT1     | 38195089 | HMT1 hnRNP methyltransferase-like 2 isoform 1                               | Cytosolic | 3  | 1.06  | 0.84 | 1.18 | 1.04  | 0.88 | 1.18 |
| 5.85 | HNRNPH3   | 14141159 | heterogeneous nuclear ribonucleoprotein H3 isoform b                        | Cytosolic | 4  | 0.77  | 0.37 | 1.45 | 0.75  | 0.32 | 1.25 |
| 5.82 | EIF4A2    | 83700235 | eukaryotic translation initiation factor 4A2                                | Cytosolic | 11 | 0.42  | 0.17 | 1.39 | 0.30  | 0.13 | 1.60 |
| 5.8  | COPB1     | 7705369  | coatamer protein complex, subunit beta                                      | Cytosolic | 3  | 0.76  | 0.37 | 1.18 | 0.82  | 0.67 | 1.38 |
| 5.79 | RPL18A    | 11415026 | ribosomal protein L18a                                                      | Cytosolic | 2  | 1.75  | 0.23 | 1.36 | 2.05  | 0.19 | 1.41 |
| 5.75 | PARP1     | 4501955  | poly (ADP-ribose) polymerase family, member 1                               | Cytosolic | 3  | 0.93  | 0.87 | 1.20 | 1.00  | 0.96 | 1.18 |
| 5.75 | POLR2B    | 4505941  | DNA directed RNA polymerase II polypeptide B                                | Cytosolic | 3  | 0.84  | 0.44 | 1.38 | 0.93  | 0.74 | 1.69 |
| 5.75 | RPL14     | 78000183 | ribosomal protein L14                                                       | Cytosolic | 4  | 1.39  | 0.60 | 1.26 | 1.60  | 0.43 | 1.24 |
| 5.73 | PRDX3     | 5802974  | peroxiredoxin 3 isoform a precursor                                         | Cytosolic | 3  | 0.63  | 0.40 | 1.46 | 0.67  | 0.47 | 1.38 |
| 5.73 | AIMP1     | 45006986 | small inducible cytokine subfamily E, member 1                              | Cytosolic | 3  | 0.97  | 0.94 | 1.33 | 1.05  | 0.75 | 1.25 |
| 5.72 | TBCA      | 4759212  | tubulin-specific chaperone a                                                | Cytosolic | 3  | 1.61  | 0.32 | 1.67 | 1.18  | 0.70 | 1.72 |
| 5.7  | CDC2      | 4502709  | cell division cycle 2 protein isoform 1                                     | Cytosolic | 3  | 0.97  | 0.81 | 1.13 | 0.98  | 0.86 | 1.12 |
| 5.7  | PEA15     | 4505705  | phosphoprotein enriched in astrocytes 15                                    | Cytosolic | 3  | 0.55  | 0.67 | 1.36 | 0.56  | 0.78 | 1.32 |
| 5.7  | UBE2I     | 4507785  | ubiquitin-conjugating enzyme E2I                                            | Cytosolic | 3  | 0.92  | 0.67 | 1.18 | 0.92  | 0.58 | 1.18 |
| 5.7  | YWHAB     | 4507949  | 14-3-3, beta polypeptide                                                    | Cytosolic | 8  | 1.06  | 0.57 | 1.17 | 1.12  | 0.38 | 1.15 |
| 5.7  | HYOU1     | 5453832  | oxygen regulated protein precursor                                          | Cytosolic | 3  | 1.21  | 0.70 | 2.09 | 1.21  | 0.69 | 2.09 |
| 5.7  | ENO2      | 5803011  | enolase 2                                                                   | Cytosolic | 6  | 0.35  | 0.11 | 1.54 | 0.25  | 0.09 | 1.77 |
| 5.67 | MAGEA4    | 58530871 | melanoma antigen family A, 4                                                | Cytosolic | 3  | 35.32 | 0.00 | 2.83 | 35.32 | 0.00 | 2.70 |
| 5.65 | TTL12     | 11056036 | tubulin tyrosine ligase-like family, member 12                              | Cytosolic | 3  | 1.02  | 0.94 | 2.70 | 1.14  | 0.68 | 2.09 |
| 5.59 | PGM3      | 7661568  | phosphoglucomutase 3                                                        | Cytosolic | 3  | 1.51  | 0.06 | 1.14 | 1.47  | 0.08 | 1.15 |
| 5.59 | CARS      | 62240992 | cysteinyI-tRNA synthetase isoform c                                         | Cytosolic | 3  | 2.70  | 0.08 | 1.94 | 2.49  | 0.07 | 1.77 |
| 5.55 | EEF1D     | 25453474 | eukaryotic translation elongation factor 1 delta isoform 1                  | Cytosolic | 3  | 2.13  | 0.22 | 1.50 | 2.61  | 0.17 | 1.53 |
| 5.5  | RPL9      | 67944630 | ribosomal protein L9                                                        | Cytosolic | 2  | 1.09  | 0.60 | 1.18 | 1.16  | 0.36 | 1.14 |
| 5.42 | FBL       | 12056465 | fibrillarin                                                                 | Cytosolic | 2  | 0.49  | 0.22 | 1.36 | 0.44  | 0.19 | 1.38 |
| 5.41 | NDUFAB1   | 4826852  | NADH dehydrogenase (ubiquinone) 1, alpha/beta subcomplex, 1, 8kDa           | Cytosolic | 4  | 0.30  | 0.12 | 1.91 | 0.26  | 0.10 | 2.21 |
| 5.4  | PSMA7     | 4506189  | proteasome alpha 7 subunit                                                  | Cytosolic | 3  | 0.96  | 0.92 | 1.43 | 1.10  | 0.72 | 1.38 |
| 5.4  | LOC441246 | 89026059 | PREDICTED: similar to 60S ribosomal protein L35 isoform 5                   | Cytosolic | 3  | 1.04  | 0.82 | 1.12 | 1.08  | 0.71 | 1.12 |
| 5.39 | CTSC      | 4503141  | cathepsin C isoform a preproprotein                                         | Cytosolic | 2  | 1.03  | 0.78 | 1.09 | 1.02  | 0.87 | 1.09 |
| 5.36 | SFRS6     | 20127499 | arginine/serine-rich splicing factor 6                                      | Cytosolic | 2  | 0.81  | 0.39 | 1.19 | 0.85  | 0.42 | 1.21 |
| 5.32 | C14orf166 | 7706322  | homeobox prox 1                                                             | Cytosolic | 3  | 1.07  | 0.84 | 1.46 | 1.03  | 0.93 | 1.33 |
| 5.31 | RPS20     | 4506697  | ribosomal protein S20                                                       | Cytosolic | 2  | 0.98  | 0.97 | 1.10 | 1.00  | 0.93 | 1.10 |
| 5.29 | XPOT      | 8051636  | tRNA exportin                                                               | Cytosolic | 2  | 0.79  | 0.13 | 1.25 | 0.85  | 0.17 | 1.25 |
| 5.29 | PPA1      | 11056044 | pyrophosphatase 1                                                           | Cytosolic | 2  | 1.14  | 0.68 | 2.75 | 1.27  | 0.51 | 2.09 |
| 5.24 | RPL26     | 4506621  | ribosomal protein L26                                                       | Cytosolic | 4  | 1.01  | 0.85 | 1.18 | 0.99  | 0.91 | 1.18 |
| 5.23 | ATXN2L    | 27262645 | ataxin 2 related protein isoform B                                          | Cytosolic | 2  | 0.93  | 0.90 | 1.32 | 0.95  | 0.95 | 1.25 |
| 5.23 | U2AF2     | 60279268 | U2 (RNU2) small nuclear RNA auxiliary factor 2 isoform b                    | Cytosolic | 3  | 0.90  | 0.84 | 1.12 | 0.89  | 0.90 | 1.11 |
| 5.15 | PAFAH1B3  | 4505587  | platelet-activating factor acetylhydrolase, isoform lb, gamma subunit 29kDa | Cytosolic | 2  | 0.95  | 0.72 | 1.18 | 0.91  | 0.65 | 1.18 |
| 5.15 | MARCKS    | 11125772 | myristoylated alanine-rich protein kinase C substrate                       | Cytosolic | 2  | 0.21  | 0.20 | 2.01 | 0.11  | 0.15 | 2.88 |
| 5.14 | NAGK      | 49574508 | N-Acetylglucosamine kinase                                                  | Cytosolic | 2  | 1.84  | 0.36 | 2.11 | 1.84  | 0.36 | 2.11 |
| 5.12 | RPS11     | 4506681  | ribosomal protein S11                                                       | Cytosolic | 2  | 1.25  | 0.31 | 1.25 | 1.28  | 0.28 | 1.25 |
| 5.11 | RBM25     | 55741709 | RNA binding motif protein 25                                                | Cytosolic | 2  | 0.79  | 0.45 | 1.38 | 0.77  | 0.39 | 1.38 |
| 5.1  | UBE2L3    | 4507789  | ubiquitin-conjugating enzyme E2L 3 isoform 1                                | Cytosolic | 3  | 1.34  | 0.73 | 1.46 | 1.02  | 0.83 | 1.54 |
| 5.05 | ABCF1     | 69354671 | ATP-binding cassette, sub-family F, member 1 isoform a                      | Cytosolic | 3  | 0.97  | 0.96 | 2.09 | 0.95  | 0.88 | 2.25 |
| 5.03 | DDX6      | 4758140  | DEAD (Asp-Glu-Ala-Asp) box polypeptide 6                                    | Cytosolic | 2  | 1.03  | 0.85 | 1.38 | 1.14  | 0.55 | 1.38 |
| 5    | C22orf28  | 7657015  | hypothetical protein LOC51493                                               | Cytosolic | 2  | 0.99  | 0.95 | 1.25 | 0.98  | 0.93 | 1.25 |
| 4.98 | MAP4      | 47519639 | microtubule-associated protein 4 isoform 1                                  | Cytosolic | 2  | 1.31  | 0.43 | 2.09 | 1.27  | 0.46 | 2.09 |
| 4.96 | UBE2N     | 4507793  | ubiquitin-conjugating enzyme E2N                                            | Cytosolic | 2  | 0.95  | 0.82 | 1.38 | 0.94  | 0.85 | 1.38 |
| 4.96 | KHDRBS1   | 5730027  | KH domain containing, RNA binding, signal transduction associated 1         | Cytosolic | 3  | 0.33  | 0.23 | 1.53 | 0.31  | 0.22 | 1.58 |

|      |           |           |                                                                    |           |   |      |      |      |      |      |      |
|------|-----------|-----------|--------------------------------------------------------------------|-----------|---|------|------|------|------|------|------|
| 4.95 | TRIM71    | 84993742  | abnormal cell LINEage LIN-41                                       | Cytosolic | 3 | 1.03 | 0.87 | 1.42 | 1.11 | 0.81 | 1.38 |
| 4.93 | NRD1      | 4505453   | nardilysin (N-arginine dibasic convertase)                         | Cytosolic | 2 | 0.86 | 0.56 | 1.18 | 0.87 | 0.63 | 1.22 |
| 4.93 | RPL11     | 15431290  | ribosomal protein L11                                              | Cytosolic | 2 | 1.22 | 0.39 | 1.54 | 1.34 | 0.28 | 1.38 |
| 4.93 | AHNAK     | 61743954  | AHNAK nucleoprotein isoform 1                                      | Cytosolic | 2 | 0.51 | 0.20 | 1.26 | 0.52 | 0.20 | 1.26 |
| 4.89 | RCC2      | 29789090  | RCC1-like                                                          | Cytosolic | 2 | 2.27 | 0.12 | 1.28 | 2.31 | 0.12 | 1.38 |
| 4.85 | C21orf33  | 5031691   | es1 protein isoform la precursor                                   | Cytosolic | 2 | 0.82 | 0.71 | 1.38 | 0.77 | 0.67 | 1.38 |
| 4.82 | MAPRE1    | 6912494   | microtubule-associated protein, RP/EB family, member 1             | Cytosolic | 2 | 1.20 | 0.62 | 2.09 | 1.22 | 0.58 | 2.09 |
| 4.8  | PSMA1     | 4506179   | proteasome alpha 1 subunit isoform 2                               | Cytosolic | 3 | 1.14 | 0.56 | 1.11 | 1.10 | 0.60 | 1.12 |
| 4.8  | EFTUD2    | 41152056  | U5 snRNP-specific protein, 116 kD                                  | Cytosolic | 2 | 0.92 | 0.85 | 1.47 | 0.91 | 0.92 | 1.33 |
| 4.78 | GCN1L1    | 54607053  | GCN1 general control of amino-acid synthesis 1-like 1              | Cytosolic | 2 | 1.17 | 0.71 | 2.09 | 1.15 | 0.73 | 2.09 |
| 4.73 | FKBP3     | 4503727   | FK506-binding protein 3                                            | Cytosolic | 2 | 1.31 | 0.80 | 1.43 | 1.47 | 0.49 | 1.36 |
| 4.68 | PEBP1     | 4505621   | prostatic binding protein                                          | Cytosolic | 4 | 1.20 | 0.44 | 1.15 | 1.17 | 0.57 | 1.15 |
| 4.6  | EIF5      | 37537716  | eukaryotic translation initiation factor 5                         | Cytosolic | 1 | 1.08 | 0.63 | 1.39 | 1.37 | 0.14 | 1.25 |
| 4.59 | HNRNPF    | 4826760   | heterogeneous nuclear ribonucleoprotein F                          | Cytosolic | 5 | 1.25 | 0.40 | 1.21 | 1.19 | 0.66 | 1.22 |
| 4.59 | RHOA      | 10835049  | ras homolog gene family, member A                                  | Cytosolic | 2 | 1.02 | 0.90 | 1.15 | 0.99 | 0.82 | 1.15 |
| 4.55 | LOC641856 | 89026739  | PREDICTED: similar to 60S ribosomal protein L32                    | Cytosolic | 2 | 1.01 | 0.86 | 1.18 | 1.06 | 0.78 | 1.18 |
| 4.54 | EIF3H     | 4503515   | eukaryotic translation initiation factor 3, subunit 3 gamma, 40kDa | Cytosolic | 2 | 1.08 | 0.53 | 1.38 | 1.11 | 0.41 | 1.38 |
| 4.54 | PAK1      | 42794769  | p21-activated kinase 1                                             | Cytosolic | 2 | 1.07 | 0.83 | 1.24 | 1.08 | 0.79 | 1.19 |
| 4.52 | CTSD      | 4503143   | cathepsin D preproprotein                                          | Cytosolic | 2 | 0.89 | 0.55 | 1.14 | 0.96 | 0.90 | 1.14 |
| 4.46 | DDAH1     | 6912328   | dimethylarginine dimethylaminohydrolase 1                          | Cytosolic | 2 | 1.45 | 0.51 | 2.09 | 1.71 | 0.40 | 2.11 |
| 4.42 | HNRNPL    | 52632383  | heterogeneous nuclear ribonucleoprotein L isoform a                | Cytosolic | 3 | 0.86 | 0.44 | 1.19 | 0.82 | 0.30 | 1.18 |
| 4.41 | SAR1A     | 9910542   | SAR1a gene homolog 1                                               | Cytosolic | 2 | 1.69 | 0.49 | 1.19 | 1.75 | 0.45 | 1.20 |
| 4.41 | EPPK1     | 13876386  | epiplakin 1                                                        | Cytosolic | 2 | 1.11 | 0.82 | 2.09 | 1.69 | 0.40 | 2.09 |
| 4.39 | DUT       | 70906441  | dUTP pyrophosphatase isoform 1 precursor                           | Cytosolic | 2 | 1.13 | 0.65 | 6.25 | 1.31 | 0.43 | 2.09 |
| 4.36 | RPL27     | 4506623   | ribosomal protein L27                                              | Cytosolic | 2 | 1.38 | 0.50 | 1.20 | 1.60 | 0.36 | 1.20 |
| 4.35 | DBI       | 120433593 | diazepam binding inhibitor isoform 2                               | Cytosolic | 2 | 0.83 | 0.75 | 1.16 | 0.69 | 0.60 | 1.18 |
| 4.31 | RPS5      | 13904870  | ribosomal protein S5                                               | Cytosolic | 2 | 0.97 | 0.98 | 1.05 | 0.92 | 0.88 | 1.05 |
| 4.3  | GNPDA1    | 13027378  | glucosamine-6-phosphate deaminase 1                                | Cytosolic | 2 | 0.92 | 0.73 | 2.09 | 0.99 | 0.99 | 2.09 |
| 4.28 | EIF3E     | 4503521   | eukaryotic translation initiation factor 3, subunit 6 48kDa        | Cytosolic | 2 | 0.98 | 0.97 | 2.56 | 1.00 | 0.98 | 3.28 |
| 4.28 | SYNCRIP   | 23397427  | synaptotagmin binding, cytoplasmic RNA interacting protein         | Cytosolic | 4 | 0.95 | 0.79 | 1.27 | 1.07 | 1.00 | 1.57 |
| 4.26 | NRBP1     | 7019333   | nuclear receptor binding protein                                   | Cytosolic | 4 | 0.93 | 0.80 | 1.18 | 0.94 | 0.78 | 1.18 |
| 4.24 | OTUB1     | 109148508 | otubain 1                                                          | Cytosolic | 3 | 1.10 | 0.62 | 1.13 | 1.06 | 0.69 | 1.11 |
| 4.21 | KPNA4     | 4504901   | karyopherin alpha 4                                                | Cytosolic | 2 | 0.98 | 0.94 | 1.38 | 0.96 | 0.89 | 1.32 |
| 4.2  | BAT2D1    | 115298682 | HBxAg transactivated protein 2                                     | Cytosolic | 2 | 0.88 | 0.60 | 1.74 | 1.13 | 0.58 | 1.49 |
| 4.19 | UBLCP1    | 21450802  | ubiquitin-like domain containing CTD phosphatase 1                 | Cytosolic | 2 | 1.12 | 0.69 | 2.09 | 1.22 | 0.53 | 2.09 |
| 4.17 | RPS6      | 17158044  | ribosomal protein S6                                               | Cytosolic | 2 | 1.12 | 0.56 | 1.18 | 1.06 | 0.77 | 1.18 |
| 4.17 | TCERG1    | 21327715  | transcription elongation regulator 1 isoform 1                     | Cytosolic | 2 | 1.00 | 0.84 | 1.45 | 0.97 | 0.87 | 1.18 |
| 4.16 | EIF4G2    | 4503539   | eukaryotic translation initiation factor 4 gamma, 2 isoform 1      | Cytosolic | 2 | 1.02 | 0.78 | 1.64 | 1.09 | 0.80 | 1.38 |
| 4.16 | MSH6      | 4504191   | mutS homolog 6                                                     | Cytosolic | 2 | 1.15 | 0.76 | 1.47 | 1.16 | 0.75 | 1.71 |
| 4.16 | COPA      | 4758030   | coatamer protein complex, subunit alpha                            | Cytosolic | 2 | 0.42 | 0.16 | 1.47 | 0.33 | 0.12 | 1.56 |
| 4.15 | PEX19     | 4506339   | peroxisomal biogenesis factor 19                                   | Cytosolic | 2 | 1.01 | 1.00 | 2.09 | 1.03 | 0.90 | 2.15 |
| 4.15 | SNRPF     | 4507131   | small nuclear ribonucleoprotein polypeptide F                      | Cytosolic | 2 | 0.89 | 0.52 | 1.18 | 0.89 | 0.60 | 1.18 |
| 4.14 | HNRNPUL1  | 21536326  | E1B-55kDa-associated protein 5 isoform a                           | Cytosolic | 2 | 1.60 | 0.58 | 1.63 | 1.02 | 0.96 | 1.50 |
| 4.13 | LAGE3     | 24430137  | L antigen family, member 3                                         | Cytosolic | 2 | 0.68 | 0.51 | 2.11 | 1.06 | 0.90 | 2.11 |
| 4.12 | L1TD1     | 31542663  | LINE-1 type transposase domain containing 1                        | Cytosolic | 2 | 1.92 | 0.19 | 1.28 | 2.19 | 0.15 | 1.29 |
| 4.12 | RPL38     | 78214522  | ribosomal protein L38                                              | Cytosolic | 2 | 0.96 | 0.96 | 1.22 | 0.77 | 0.82 | 1.28 |
| 4.11 | CTBP2     | 12746590  | C-terminal binding protein 2 isoform 2                             | Cytosolic | 2 | 1.13 | 0.74 | 1.18 | 1.03 | 0.96 | 1.21 |
| 4.11 | GEMIN4    | 122939157 | gemin 4                                                            | Cytosolic | 2 | 0.88 | 0.81 | 2.09 | 0.89 | 0.82 | 2.09 |
| 4.1  | RPS17     | 4506693   | ribosomal protein S17                                              | Cytosolic | 3 | 1.05 | 0.96 | 1.13 | 1.10 | 0.76 | 1.11 |
| 4.1  | FEN1      | 4758356   | flap structure-specific endonuclease 1                             | Cytosolic | 2 | 0.71 | 0.49 | 1.38 | 0.79 | 0.59 | 1.38 |
| 4.1  | PAK2      | 32483399  | p21-activated kinase 2                                             | Cytosolic | 2 | 0.99 | 0.97 | 6.19 | 1.07 | 0.70 | 3.05 |
| 4.08 | COP2      | 4759264   | COP9 constitutive photomorphogenic homolog subunit 2               | Cytosolic | 2 | 1.14 | 0.81 | 1.45 | 1.20 | 0.74 | 1.45 |
| 4.08 | API5      | 5729730   | apoptosis inhibitor 5                                              | Cytosolic | 2 | 0.84 | 0.56 | 1.25 | 0.82 | 0.61 | 1.25 |
| 4.07 | FDPS      | 4503685   | farnesyl diphosphate synthase                                      | Cytosolic | 3 | 0.39 | 0.40 | 1.54 | 0.50 | 0.48 | 1.36 |
| 4.07 | DNAJA1    | 4504511   | Dnaj (Hsp40) homolog, subfamily A, member 1                        | Cytosolic | 2 | 0.93 | 0.74 | 1.38 | 0.92 | 0.79 | 1.38 |
| 4.06 | TPT1      | 4507669   | tumor protein, translationally-controlled 1                        | Cytosolic | 2 | 1.12 | 0.88 | 1.14 | 1.10 | 0.76 | 1.14 |
| 4.06 | RBM12     | 23510462  | RNA binding motif protein 12                                       | Cytosolic | 2 | 0.89 | 0.62 | 1.27 | 0.95 | 0.95 | 1.26 |
| 4.06 | USP11     | 24234683  | ubiquitin specific protease 11                                     | Cytosolic | 2 | 0.68 | 0.51 | 2.11 | 0.70 | 0.54 | 2.09 |
| 4.06 | PPAT      | 29570798  | phosphoribosyl pyrophosphate amidotransferase proprotein           | Cytosolic | 2 | 0.88 | 0.82 | 2.09 | 0.95 | 0.94 | 2.09 |
| 4.06 | MTAP      | 47132622  | 5'-methylthioadenosine phosphorylase                               | Cytosolic | 2 | 1.17 | 0.62 | 1.25 | 1.15 | 0.65 | 1.28 |
| 4.05 | CBR1      | 4502599   | carbonyl reductase 1                                               | Cytosolic | 2 | 8.47 | 0.13 | 2.75 | 8.79 | 0.12 | 2.75 |



|      |           |           |                                                                            |           |   |      |      |      |      |      |      |
|------|-----------|-----------|----------------------------------------------------------------------------|-----------|---|------|------|------|------|------|------|
| 4.05 | ZC3H18    | 31377595  | conserved nuclear protein NHN1                                             | Cytosolic | 2 | 0.54 | 0.30 | 2.09 | 0.47 | 0.25 | 5.92 |
| 4.05 | FAM98A    | 56699482  | hypothetical protein LOC25940                                              | Cytosolic | 2 | 1.34 | 0.56 | 2.11 | 1.22 | 0.66 | 2.09 |
| 4.04 | SHMT2     | 19923315  | serine hydroxymethyltransferase 2 (mitochondrial)                          | Cytosolic | 2 | 0.90 | 0.82 | 1.14 | 0.88 | 0.66 | 1.14 |
| 4.04 | SMARCC1   | 21237802  | SWI/SNF-related matrix-associated actin-dependent regulator of chromatin 1 | Cytosolic | 2 | 0.80 | 0.69 | 2.09 | 0.97 | 0.97 | 2.09 |
| 4.04 | SNX2      | 23111038  | sorting nexin 2                                                            | Cytosolic | 2 | 0.95 | 0.96 | 1.25 | 0.89 | 0.76 | 1.25 |
| 4.03 | EIF2S3    | 4503507   | eukaryotic translation initiation factor 2, subunit 3 gamma, 52kDa         | Cytosolic | 2 | 0.98 | 0.97 | 2.09 | 0.95 | 0.92 | 2.09 |
| 4.03 | UFC1      | 7705481   | Ufm1-conjugating enzyme 1                                                  | Cytosolic | 2 | 0.61 | 0.42 | 1.36 | 0.59 | 0.39 | 1.51 |
| 4.03 | BOLA2B    | 85797673  | bolA-like protein 2B                                                       | Cytosolic | 2 | 1.06 | 0.78 | 1.25 | 0.98 | 0.97 | 1.26 |
| 4.02 | HIST1H2BN | 4504261   | H2B histone family, member D                                               | Cytosolic | 2 | 0.97 | 0.79 | 1.15 | 0.96 | 0.84 | 1.15 |
| 4.02 | PABPC4    | 4504715   | poly A binding protein, cytoplasmic 4                                      | Cytosolic | 4 | 0.99 | 0.99 | 1.38 | 1.07 | 0.74 | 1.38 |
| 4.02 | PAFAH1B2  | 4505585   | platelet-activating factor acetylhydrolase, isoform Ib, beta subunit 30kDa | Cytosolic | 2 | 1.82 | 0.58 | 1.32 | 1.67 | 0.57 | 1.36 |
| 4.02 | RPL18     | 4506607   | ribosomal protein L18                                                      | Cytosolic | 2 | 1.14 | 0.72 | 1.25 | 1.16 | 0.67 | 1.25 |
| 4.02 | PRDX4     | 5453549   | thioredoxin peroxidase                                                     | Cytosolic | 3 | 1.00 | 0.96 | 1.63 | 0.97 | 0.75 | 1.75 |
| 4.02 | M6PRBP1   | 20127486  | mannose 6 phosphate receptor binding protein 1                             | Cytosolic | 2 | 0.71 | 0.55 | 2.09 | 0.78 | 0.65 | 2.09 |
| 4.02 | GPS1      | 47078240  | G protein pathway suppressor 1 isoform 2                                   | Cytosolic | 2 | 0.97 | 0.79 | 1.56 | 0.90 | 0.60 | 1.45 |
| 4.01 | C1QBP     | 4502491   | complement component 1, q subcomponent binding protein precursor           | Cytosolic | 3 | 0.91 | 0.82 | 1.15 | 0.93 | 0.98 | 1.15 |
| 4.01 | NP        | 4557801   | purine nucleoside phosphorylase                                            | Cytosolic | 3 | 1.58 | 0.43 | 1.38 | 1.47 | 0.49 | 1.38 |
| 4.01 | WDR3      | 5803221   | WD repeat-containing protein 3                                             | Cytosolic | 2 | 0.92 | 0.74 | 2.09 | 0.92 | 0.75 | 2.09 |
| 4.01 | CPSF6     | 5901928   | cleavage and polyadenylation specific factor 6, 68 kD subunit              | Cytosolic | 3 | 0.79 | 0.61 | 1.24 | 0.76 | 0.54 | 1.25 |
| 4.01 | LUC7L     | 8922297   | LUC7-like isoform a                                                        | Cytosolic | 2 | 0.91 | 0.83 | 1.12 | 0.86 | 0.80 | 1.12 |
| 4.01 | C19orf43  | 13128992  | hypothetical protein MGC2803                                               | Cytosolic | 3 | 0.63 | 0.48 | 1.39 | 0.57 | 0.68 | 1.56 |
| 4.01 | SAPS3     | 13489083  | SAPS domain family, member 3                                               | Cytosolic | 2 | 1.01 | 0.97 | 2.09 | 1.17 | 0.71 | 2.09 |
| 4.01 | VAT1      | 18379349  | vesicle amine transport protein 1                                          | Cytosolic | 2 | 0.82 | 0.72 | 2.09 | 1.10 | 0.84 | 2.11 |
| 4.01 | ATP6V1B2  | 19913428  | vacuolar H+ATPase B2                                                       | Cytosolic | 2 | 0.61 | 0.42 | 1.38 | 0.74 | 0.64 | 1.58 |
| 4.01 | SMU1      | 109948304 | smu-1 suppressor of mec-8 and unc-52 homolog                               | Cytosolic | 2 | 0.42 | 0.31 | 1.63 | 0.52 | 0.42 | 1.31 |
| 4.01 | LUC7L2    | 116812577 | LUC7-like 2                                                                | Cytosolic | 2 | 0.60 | 0.43 | 1.38 | 0.72 | 0.56 | 1.38 |
| 4    | PPT1      | 4506031   | palmitoyl-protein thioesterase 1                                           | Cytosolic | 2 | 0.66 | 0.28 | 1.80 | 0.43 | 0.18 | 1.31 |
| 4    | ADSL      | 4557269   | adenylosuccinate lyase                                                     | Cytosolic | 2 | 1.26 | 0.65 | 2.11 | 1.51 | 0.48 | 2.11 |
| 4    | DAG1      | 4758116   | dystroglycan 1 precursor                                                   | Cytosolic | 2 | 1.49 | 0.48 | 1.25 | 1.43 | 0.50 | 1.24 |
| 4    | NME4      | 4826862   | nucleoside-diphosphate kinase 4                                            | Cytosolic | 2 | 0.56 | 0.37 | 2.09 | 0.68 | 0.51 | 2.11 |
| 4    | BCAS2     | 5031653   | breast carcinoma amplified sequence 2                                      | Cytosolic | 2 | 0.82 | 0.45 | 2.09 | 0.85 | 0.52 | 2.09 |
| 4    | SFRS13A   | 5730079   | FUS interacting protein (serine-arginine rich) 1 isoform 1                 | Cytosolic | 2 | 0.83 | 0.41 | 2.09 | 0.83 | 0.41 | 2.09 |
| 4    | AHSA1     | 6912280   | AHA1, activator of heat shock 90kDa protein ATPase homolog 1               | Cytosolic | 3 | 0.89 | 0.76 | 1.10 | 1.01 | 0.83 | 1.17 |
| 4    | MCTS1     | 7662502   | malignant T cell amplified sequence 1                                      | Cytosolic | 2 | 0.92 | 0.88 | 3.02 | 0.82 | 0.70 | 2.09 |
| 4    | CAB39     | 7706481   | calcium binding protein 39                                                 | Cytosolic | 2 | 0.97 | 0.95 | 2.09 | 0.94 | 0.88 | 2.31 |
| 4    | PRTFDC1   | 9910262   | phosphoribosyl transferase domain containing 1                             | Cytosolic | 2 | 0.97 | 0.91 | 1.38 | 0.97 | 0.96 | 1.38 |
| 4    | EIF3K     | 10801345  | eukaryotic translation initiation factor 3, subunit 12                     | Cytosolic | 2 | 1.82 | 0.34 | 1.16 | 1.84 | 0.32 | 1.16 |
| 4    | NAT13     | 13376735  | Mak3 homolog                                                               | Cytosolic | 2 | 1.05 | 0.99 | 1.24 | 1.14 | 0.71 | 1.19 |
| 4    | PDLIM1    | 13994151  | PDZ and LIM domain 1 (elfin)                                               | Cytosolic | 2 | 2.11 | 0.30 | 2.09 | 2.00 | 0.32 | 2.09 |
| 4    | DBN1      | 18426915  | drebrin 1 isoform a                                                        | Cytosolic | 2 | 1.00 | 0.83 | 1.38 | 0.95 | 0.99 | 1.54 |
| 4    | FH        | 19743875  | fumarate hydratase precursor                                               | Cytosolic | 2 | 0.61 | 0.43 | 2.11 | 0.59 | 0.41 | 2.17 |
| 4    | GLS       | 21361452  | glutaminase C                                                              | Cytosolic | 2 | 0.86 | 0.62 | 5.35 | 0.71 | 0.35 | 2.09 |
| 4    | PSMD7     | 25777615  | proteasome 26S non-ATPase subunit 7                                        | Cytosolic | 2 | 0.86 | 0.77 | 1.18 | 0.90 | 0.93 | 1.21 |
| 4    | NHP2L1    | 51317376  | NHP2 non-histone chromosome protein 2-like 1                               | Cytosolic | 2 | 0.88 | 0.44 | 1.25 | 0.95 | 0.68 | 1.25 |
| 4    | HMGCS1    | 54020720  | 3-hydroxy-3-methylglutaryl-Coenzyme A synthase 1 (soluble)                 | Cytosolic | 2 | 1.03 | 0.77 | 1.15 | 1.05 | 0.92 | 1.15 |
| 4    | HNRNPAB   | 55956921  | heterogeneous nuclear ribonucleoprotein AB isoform b                       | Cytosolic | 2 | 1.02 | 0.81 | 1.09 | 0.98 | 0.59 | 1.09 |
| 4    | LOC389842 | 89060650  | PREDICTED: similar to Ran-specific GTPase-activating protein               | Cytosolic | 2 | 1.03 | 0.79 | 1.38 | 1.00 | 0.97 | 1.38 |
| 4    | HSPBP1    | 112363070 | hsp70-interacting protein                                                  | Cytosolic | 2 | 1.12 | 0.67 | 1.57 | 1.03 | 0.84 | 1.64 |
| 4    | LOC727761 | 113413593 | PREDICTED: similar to deoxythymidylate kinase isoform 1                    | Cytosolic | 2 | 1.03 | 0.83 | 1.41 | 1.09 | 0.86 | 1.25 |
| 4    | LOC645161 | 113422026 | PREDICTED: similar to 60S ribosomal protein L12                            | Cytosolic | 2 | 1.50 | 0.38 | 1.38 | 1.41 | 0.42 | 1.38 |
| 4    | USP10     | 119220605 | ubiquitin specific protease 10                                             | Cytosolic | 2 | 1.12 | 0.68 | 1.18 | 1.04 | 0.94 | 1.18 |
| 3.98 | MACF1     | 33188443  | microfilament and actin filament cross-linker protein isoform b            | Cytosolic | 2 | 1.12 | 0.70 | 3.77 | 1.10 | 0.74 | 6.61 |
| 3.92 | TTN       | 110349719 | titin isoform N2-A                                                         | Cytosolic | 1 | 1.20 | 0.97 | 1.29 | 1.21 | 0.59 | 1.26 |
| 3.82 | WARS      | 47419916  | tryptophanyl-tRNA synthetase isoform a                                     | Cytosolic | 2 | 2.99 | 0.29 | 1.29 | 2.99 | 0.28 | 1.32 |
| 3.81 | WDR12     | 16445424  | WD repeat domain 12 protein                                                | Cytosolic | 2 | 0.80 | 0.47 | 1.41 | 0.70 | 0.29 | 1.38 |
| 3.79 | CSNK2B    | 23503295  | casein kinase 2, beta polypeptide                                          | Cytosolic | 2 | 1.16 | 0.76 | 2.11 | 1.03 | 0.95 | 2.09 |
| 3.77 | PSMD8     | 4506233   | proteasome 26S non-ATPase subunit 8                                        | Cytosolic | 2 | 1.02 | 0.96 | 4.66 | 0.97 | 0.97 | 3.28 |
| 3.76 | PLCG1     | 33598948  | phospholipase C gamma 1 isoform a                                          | Cytosolic | 2 | 0.86 | 0.75 | 4.33 | 0.77 | 0.57 | 2.09 |
| 3.76 | CARHSP1   | 109715858 | calcium-regulated heat-stable protein 1                                    | Cytosolic | 3 | 1.04 | 0.87 | 1.24 | 1.22 | 0.75 | 1.21 |
| 3.75 | DKC1      | 4503337   | dyskerin                                                                   | Cytosolic | 3 | 0.61 | 0.32 | 1.56 | 0.62 | 0.37 | 1.38 |
| 3.74 | YWHAH     | 4507951   | tyrosine 3/tryptophan 5 -monooxygenase activation protein, eta polypeptide | Cytosolic | 6 | 1.94 | 0.40 | 1.50 | 1.96 | 0.36 | 1.51 |

|      |           |           |                                                                                                    |           |   |      |      |      |      |      |      |
|------|-----------|-----------|----------------------------------------------------------------------------------------------------|-----------|---|------|------|------|------|------|------|
| 3.71 | PCMT1     | 4885539   | protein-L-isoadpartate (D-aspartate) O-methyltransferase                                           | Cytosolic | 2 | 1.06 | 0.89 | 2.09 | 1.13 | 0.79 | 2.09 |
| 3.7  | MT2A      | 5174764   | metallothionein 2A                                                                                 | Cytosolic | 2 | 2.44 | 0.32 | 1.49 | 2.51 | 0.31 | 1.49 |
| 3.7  | LSM7      | 7706423   | U6 snRNA-associated Sm-like protein LSM7                                                           | Cytosolic | 2 | 0.60 | 0.43 | 1.38 | 0.60 | 0.42 | 1.38 |
| 3.7  | TMEM189-U | 40806190  | ubiquitin-conjugating enzyme E2 Kua-UEV isoform 1                                                  | Cytosolic | 2 | 0.89 | 0.82 | 1.25 | 0.88 | 0.77 | 1.25 |
| 3.7  | SUMO1     | 54792065  | SMT3 suppressor of mif two 3 homolog 1 isoform a precursor                                         | Cytosolic | 2 | 0.93 | 0.90 | 2.09 | 0.78 | 0.65 | 2.09 |
| 3.57 | AIMP2     | 11125770  | JTV1                                                                                               | Cytosolic | 1 | 0.98 | 0.96 | 1.15 | 0.94 | 0.71 | 1.15 |
| 3.57 | RAB8A     | 16933567  | mel transforming oncogene                                                                          | Cytosolic | 2 | 1.06 | 0.86 | 2.56 | 1.02 | 0.95 | 2.09 |
| 3.56 | SPTAN1    | 4507191   | spectrin, alpha, non-erythrocytic 1 (alpha-fodrin)                                                 | Cytosolic | 2 | 1.10 | 0.90 | 1.71 | 1.17 | 0.91 | 1.57 |
| 3.56 | S100A11   | 5032057   | S100 calcium binding protein A11                                                                   | Cytosolic | 1 | 0.87 | 0.97 | 1.34 | 0.68 | 0.77 | 1.42 |
| 3.56 | EIF2S2    | 29826335  | eukaryotic translation initiation factor 2 beta                                                    | Cytosolic | 2 | 1.01 | 0.97 | 2.21 | 1.04 | 0.91 | 2.09 |
| 3.53 | BCLAF1    | 7661958   | BCL2-associated transcription factor 1 isoform 1                                                   | Cytosolic | 2 | 0.87 | 0.73 | 5.97 | 0.77 | 0.55 | 2.09 |
| 3.53 | CARM1     | 40288288  | coactivator-associated arginine methyltransferase 1                                                | Cytosolic | 2 | 0.96 | 0.94 | 2.09 | 0.94 | 0.90 | 2.09 |
| 3.53 | DIAPH1    | 119395760 | diaphanous 1 isoform 2                                                                             | Cytosolic | 2 | 0.87 | 0.72 | 1.38 | 0.83 | 0.64 | 2.13 |
| 3.52 | RPL22     | 4506613   | ribosomal protein L22 proprotein                                                                   | Cytosolic | 2 | 1.38 | 0.41 | 1.25 | 1.29 | 0.43 | 1.25 |
| 3.52 | S100A10   | 4506761   | S100 calcium binding protein A10                                                                   | Cytosolic | 2 | 1.17 | 0.76 | 2.09 | 1.31 | 0.63 | 2.09 |
| 3.52 | CNN2      | 4758018   | calponin 2 isoform a                                                                               | Cytosolic | 3 | 1.34 | 0.59 | 1.15 | 1.33 | 0.60 | 1.15 |
| 3.52 | CDC37     | 5901922   | cell division cycle 37 protein                                                                     | Cytosolic | 2 | 1.00 | 0.95 | 1.25 | 0.99 | 0.96 | 1.24 |
| 3.52 | S100A13   | 66737374  | S100 calcium binding protein A13                                                                   | Cytosolic | 2 | 0.52 | 0.28 | 2.11 | 0.54 | 0.30 | 2.61 |
| 3.51 | CSDE1     | 56117852  | upstream of NRAS isoform 1                                                                         | Cytosolic | 1 | 0.90 | 0.50 | 1.20 | 0.90 | 0.51 | 1.15 |
| 3.47 | PPP1R12A  | 4505317   | protein phosphatase 1, regulatory (inhibitor) subunit 12A                                          | Cytosolic | 2 | 0.77 | 0.52 | 2.11 | 0.98 | 0.98 | 2.49 |
| 3.46 | RUVBL2    | 5730023   | RuvB-like 2                                                                                        | Cytosolic | 2 | 1.21 | 0.68 | 2.09 | 1.19 | 0.70 | 2.09 |
| 3.42 | HNRPDL    | 14110407  | heterogeneous nuclear ribonucleoprotein D-like                                                     | Cytosolic | 2 | 0.79 | 0.64 | 2.09 | 0.79 | 0.63 | 2.09 |
| 3.41 | NSFL1C    | 29568099  | p47 protein isoform b                                                                              | Cytosolic | 2 | 1.09 | 0.76 | 1.91 | 1.00 | 0.90 | 1.66 |
| 3.41 | THOC4     | 55770864  | THO complex 4                                                                                      | Cytosolic | 1 | 0.61 | 0.45 | 1.42 | 0.50 | 0.41 | 1.36 |
| 3.4  | RPL31     | 4506633   | ribosomal protein L31                                                                              | Cytosolic | 2 | 1.17 | 0.72 | 1.16 | 1.11 | 0.73 | 1.25 |
| 3.4  | ENOPH1    | 10864017  | E-1 enzyme                                                                                         | Cytosolic | 2 | 1.06 | 0.90 | 2.09 | 0.84 | 0.75 | 2.09 |
| 3.39 | USP5      | 4507855   | Ubiquitin isopeptidase T                                                                           | Cytosolic | 1 | 0.76 | 0.51 | 1.21 | 0.88 | 0.67 | 1.31 |
| 3.39 | RPS18     | 11968182  | ribosomal protein S18                                                                              | Cytosolic | 1 | 0.95 | 0.88 | 1.25 | 0.97 | 0.96 | 1.25 |
| 3.36 | UMPS      | 4507835   | uridine monophosphate synthase                                                                     | Cytosolic | 1 | 0.82 | 0.71 | 2.11 | 0.98 | 0.98 | 2.09 |
| 3.33 | PSMD14    | 5031981   | 26S proteasome-associated pad1 homolog                                                             | Cytosolic | 1 | 1.08 | 0.58 | 2.09 | 1.05 | 0.70 | 2.09 |
| 3.25 | LOC339799 | 88954789  | PREDICTED: similar to eukaryotic translation initiation factor 3, subunit 5 epsilon, 47kDa isoform | Cytosolic | 1 | 1.09 | 0.80 | 2.09 | 1.12 | 0.75 | 2.09 |
| 3.24 | SSRP1     | 4507241   | structure specific recognition protein 1                                                           | Cytosolic | 1 | 1.84 | 0.27 | 1.36 | 1.98 | 0.23 | 1.39 |
| 3.24 | MDH1      | 5174539   | cytosolic malate dehydrogenase                                                                     | Cytosolic | 1 | 1.41 | 0.52 | 2.09 | 1.26 | 0.62 | 2.09 |
| 3.19 | SIN3A     | 23397666  | transcriptional co-repressor Sin3A                                                                 | Cytosolic | 1 | 0.74 | 0.65 | 1.71 | 0.55 | 0.49 | 1.61 |
| 3.17 | GLTSCR2   | 7657130   | glioma tumor suppressor candidate region gene 2                                                    | Cytosolic | 1 | 0.99 | 1.00 | 2.09 | 1.26 | 0.65 | 2.09 |
| 3.15 | SRM       | 63253298  | spermidine synthase                                                                                | Cytosolic | 1 | 1.14 | 0.69 | 1.15 | 1.05 | 0.83 | 1.25 |
| 3.11 | APRT      | 4502171   | adenine phosphoribosyltransferase isoform a                                                        | Cytosolic | 1 | 0.92 | 0.87 | 2.09 | 0.86 | 0.77 | 2.09 |
| 3.06 | PSMC3     | 21361144  | proteasome 26S ATPase subunit 3                                                                    | Cytosolic | 2 | 0.78 | 0.92 | 1.43 | 0.50 | 0.74 | 1.46 |
| 3.05 | RBM39     | 4757926   | RNA binding motif protein 39 isoform b                                                             | Cytosolic | 1 | 0.98 | 0.94 | 1.25 | 0.98 | 0.90 | 1.25 |
| 3.02 | CCAR1     | 46852388  | cell-cycle and apoptosis regulatory protein 1                                                      | Cytosolic | 1 | 0.82 | 0.72 | 2.11 | 0.62 | 0.44 | 2.09 |
| 3.01 | WDHD1     | 5901892   | WD repeat and HMG-box DNA binding protein 1 isoform 1                                              | Cytosolic | 1 | 1.05 | 0.91 | 2.09 | 1.04 | 0.93 | 2.09 |
| 3.01 | COPS4     | 38373690  | COP9 signalosome subunit 4                                                                         | Cytosolic | 1 | 1.00 | 0.93 | 1.38 | 1.07 | 0.83 | 1.38 |
| 3    | HSPE1     | 4504523   | heat shock 10kDa protein 1 (chaperonin 10)                                                         | Cytosolic | 1 | 1.24 | 0.94 | 1.71 | 0.63 | 0.57 | 1.82 |
| 2.99 | NARG1     | 17149828  | NMDA receptor regulated 1                                                                          | Cytosolic | 1 | 1.00 | 0.86 | 1.20 | 0.94 | 0.54 | 1.21 |
| 2.98 | ACBD6     | 14150169  | acyl-Coenzyme A binding domain containing 6                                                        | Cytosolic | 1 | 0.95 | 0.96 | 1.38 | 0.89 | 0.74 | 1.38 |
| 2.98 | SEC31A    | 41349439  | SEC31 homolog A isoform 1                                                                          | Cytosolic | 1 | 1.75 | 0.43 | 1.24 | 1.72 | 0.41 | 1.22 |
| 2.97 | CTNBL1    | 18644734  | beta catenin-like 1                                                                                | Cytosolic | 1 | 0.75 | 0.46 | 1.38 | 0.70 | 0.40 | 1.38 |
| 2.96 | CALD1     | 4826657   | caldesmon 1 isoform 2                                                                              | Cytosolic | 1 | 4.33 | 0.24 | 1.91 | 4.06 | 0.27 | 2.33 |
| 2.96 | TRMT112   | 7705477   | hypothetical protein LOC51504                                                                      | Cytosolic | 1 | 0.91 | 0.83 | 1.22 | 0.92 | 0.90 | 1.18 |
| 2.93 | GRB2      | 4504111   | growth factor receptor-bound protein 2 isoform 1                                                   | Cytosolic | 1 | 1.29 | 0.62 | 2.11 | 1.01 | 0.97 | 2.09 |
| 2.93 | ENY2      | 9910186   | enhancer of yellow 2 homolog                                                                       | Cytosolic | 1 | 1.16 | 0.51 | 1.38 | 1.07 | 0.59 | 1.53 |
| 2.93 | MGEA5     | 11024698  | meningioma expressed antigen 5 (hyaluronidase)                                                     | Cytosolic | 1 | 1.03 | 0.92 | 2.09 | 0.93 | 0.85 | 2.09 |
| 2.92 | CRABP2    | 4503029   | cellular retinoic acid binding protein 2                                                           | Cytosolic | 1 | 0.30 | 0.26 | 2.63 | 0.10 | 0.21 | 4.61 |
| 2.92 | PFDN2     | 12408675  | prefoldin subunit 2                                                                                | Cytosolic | 1 | 0.73 | 0.58 | 2.09 | 0.71 | 0.55 | 2.09 |
| 2.9  | GTF2I     | 14670356  | general transcription factor II, i isoform 4                                                       | Cytosolic | 1 | 0.73 | 0.58 | 2.09 | 1.54 | 0.46 | 2.09 |
| 2.89 | HINT1     | 4885413   | histidine triad nucleotide binding protein 1                                                       | Cytosolic | 1 | 1.03 | 0.97 | 1.10 | 1.03 | 0.97 | 1.10 |
| 2.88 | VARS      | 5454158   | valyl-tRNA synthetase                                                                              | Cytosolic | 1 | 0.94 | 0.88 | 4.97 | 0.90 | 0.79 | 2.09 |
| 2.88 | PDCD6IP   | 22027538  | programmed cell death 6 interacting protein                                                        | Cytosolic | 1 | 0.97 | 0.90 | 1.41 | 0.92 | 0.69 | 1.38 |
| 2.8  | PSMB5     | 4506201   | proteasome beta 5 subunit                                                                          | Cytosolic | 1 | 1.17 | 0.29 | 1.69 | 1.11 | 0.31 | 1.50 |
| 2.79 | PANK4     | 8922665   | pantothenate kinase 4                                                                              | Cytosolic | 1 | 0.95 | 0.89 | 1.38 | 0.93 | 0.74 | 2.19 |
| 2.78 | KRT19     | 24234699  | keratin 19                                                                                         | Cytosolic | 3 | 1.77 | 0.38 | 2.11 | 1.92 | 0.34 | 2.11 |

|      |           |           |                                                                  |           |   |      |      |      |      |      |       |
|------|-----------|-----------|------------------------------------------------------------------|-----------|---|------|------|------|------|------|-------|
| 2.77 | NQO1      | 70995422  | NAD(P)H menadiene oxidoreductase 1, dioxin-inducible isoform c   | Cytosolic | 1 | 3.44 | 0.20 | 1.42 | 3.10 | 0.22 | 1.71  |
| 2.72 | PSMA2     | 4506181   | proteasome alpha 2 subunit                                       | Cytosolic | 1 | 1.04 | 0.67 | 1.17 | 0.99 | 0.94 | 1.16  |
| 2.71 | SH3GL1    | 4506929   | SH3-domain GRB2-like 1                                           | Cytosolic | 2 | 0.94 | 0.76 | 1.82 | 1.08 | 0.86 | 1.54  |
| 2.71 | TRIM24    | 47419911  | transcriptional intermediary factor 1 alpha isoform a            | Cytosolic | 1 | 1.53 | 0.47 | 2.09 | 1.42 | 0.52 | 2.09  |
| 2.68 | PSMA6     | 23110944  | proteasome alpha 6 subunit                                       | Cytosolic | 1 | 1.24 | 0.66 | 1.25 | 1.24 | 0.68 | 1.25  |
| 2.68 | SEC23A    | 38202214  | SEC23-related protein A                                          | Cytosolic | 1 | 1.22 | 0.65 | 1.27 | 1.17 | 0.70 | 1.25  |
| 2.68 | GNL3      | 45643129  | guanine nucleotide binding protein-like 3 isoform 2              | Cytosolic | 1 | 0.69 | 0.43 | 1.50 | 0.64 | 0.37 | 1.38  |
| 2.67 | PPM1A     | 29557939  | protein phosphatase 1A isoform 1                                 | Cytosolic | 2 | 1.26 | 0.65 | 1.41 | 1.31 | 0.59 | 1.38  |
| 2.67 | TROVE2    | 31377800  | 60kD Ro/SSA autoantigen isoform 2                                | Cytosolic | 1 | 1.03 | 0.94 | 5.81 | 1.09 | 0.78 | 5.40  |
| 2.65 | FAM129B   | 51093863  | hypothetical protein LOC64855 isoform 1                          | Cytosolic | 1 | 1.16 | 0.76 | 2.09 | 1.18 | 0.73 | 2.09  |
| 2.58 | TRAP1     | 7706485   | TNF receptor-associated protein 1                                | Cytosolic | 4 | 0.93 | 0.85 | 1.38 | 0.92 | 0.88 | 1.38  |
| 2.57 | VPS4A     | 7019569   | vacuolar protein sorting factor 4A                               | Cytosolic | 1 | 1.09 | 0.83 | 2.09 | 0.98 | 0.99 | 2.09  |
| 2.57 | MARCKSL1  | 13491174  | MARCKS-like 1                                                    | Cytosolic | 2 | 0.18 | 0.21 | 1.91 | 0.05 | 0.18 | 3.94  |
| 2.56 | PSME3     | 30410796  | proteasome activator subunit 3 isoform 2                         | Cytosolic | 1 | 1.02 | 0.95 | 2.09 | 0.95 | 0.92 | 2.09  |
| 2.56 | MTA3      | 50838795  | metastasis associated 1 family, member 3                         | Cytosolic | 1 | 0.94 | 0.88 | 7.80 | 0.94 | 0.86 | 15.56 |
| 2.54 | RGPD5     | 83267877  | RANBP2-like and GRIP domain containing 5 isoform 1               | Cytosolic | 1 | 0.74 | 0.59 | 2.09 | 0.97 | 0.97 | 2.09  |
| 2.52 | ZYX       | 58530845  | zyxin                                                            | Cytosolic | 1 | 1.00 | 0.98 | 2.70 | 1.12 | 0.81 | 2.09  |
| 2.51 | RCN1      | 4506455   | reticulocalbin 1 precursor                                       | Cytosolic | 1 | 0.79 | 0.73 | 1.19 | 0.57 | 0.57 | 1.26  |
| 2.5  | SF3B2     | 55749531  | splicing factor 3B subunit 2                                     | Cytosolic | 1 | 0.87 | 0.42 | 2.09 | 1.01 | 0.89 | 2.09  |
| 2.5  | EIF5B     | 84043963  | eukaryotic translation initiation factor 5B                      | Cytosolic | 1 | 0.83 | 0.60 | 1.38 | 0.85 | 0.71 | 1.38  |
| 2.49 | RAD23B    | 4506387   | UV excision repair protein RAD23 homolog B                       | Cytosolic | 1 | 1.03 | 0.98 | 1.38 | 0.95 | 0.70 | 1.38  |
| 2.48 | SART3     | 7661952   | squamous cell carcinoma antigen recognized by T cells 3          | Cytosolic | 1 | 0.92 | 0.89 | 2.09 | 0.85 | 0.76 | 2.09  |
| 2.48 | ATP6V1A   | 19913424  | ATPase, H+ transporting, lysosomal 70kD, V1 subunit A, isoform 1 | Cytosolic | 1 | 1.16 | 0.66 | 2.09 | 1.16 | 0.65 | 2.09  |
| 2.47 | QTRTD1    | 13375872  | queuine tRNA-ribosyltransferase domain containing 1              | Cytosolic | 1 | 0.64 | 0.46 | 2.11 | 0.61 | 0.42 | 2.68  |
| 2.46 | GLOD4     | 34850074  | hypothetical protein LOC51031                                    | Cytosolic | 1 | 0.98 | 0.89 | 1.54 | 1.02 | 0.89 | 1.54  |
| 2.44 | INA       | 14249342  | internexin neuronal intermediate filament protein, alpha         | Cytosolic | 2 | 0.17 | 0.14 | 2.11 | 0.31 | 0.21 | 2.11  |
| 2.43 | ERP29     | 5803013   | endoplasmic reticulum protein 29 isoform 1 precursor             | Cytosolic | 1 | 0.97 | 0.99 | 1.38 | 0.98 | 1.00 | 1.38  |
| 2.43 | ALDH9A1   | 115387104 | aldehyde dehydrogenase 9A1                                       | Cytosolic | 1 | 0.88 | 0.78 | 2.19 | 0.88 | 0.77 | 4.25  |
| 2.41 | UBE1L2    | 40255039  | ubiquitin-activating enzyme E1-like 2                            | Cytosolic | 1 | 2.07 | 0.31 | 2.11 | 1.42 | 0.53 | 2.09  |
| 2.41 | DPP3      | 86792661  | dipeptidyl peptidase III                                         | Cytosolic | 1 | 1.26 | 0.65 | 2.09 | 1.22 | 0.70 | 2.09  |
| 2.4  | DCTPP1    | 13129100  | hypothetical protein LOC79077                                    | Cytosolic | 1 | 0.89 | 0.82 | 2.09 | 0.95 | 0.92 | 2.09  |
| 2.4  | UBR4      | 82659109  | retinoblastoma-associated factor 600                             | Cytosolic | 1 | 1.11 | 0.83 | 2.09 | 1.16 | 0.76 | 2.09  |
| 2.39 | GTPBP4    | 55953087  | G protein-binding protein CRFG                                   | Cytosolic | 1 | 0.67 | 0.39 | 1.69 | 0.72 | 0.49 | 2.05  |
| 2.38 | ETNK1     | 10092615  | ethanolamine kinase 1 isoform A                                  | Cytosolic | 1 | 1.16 | 0.76 | 2.09 | 1.20 | 0.70 | 2.09  |
| 2.38 | DDX42     | 45446747  | DEAD box polypeptide 42 protein                                  | Cytosolic | 1 | 0.75 | 0.60 | 2.09 | 0.81 | 0.70 | 2.09  |
| 2.37 | BAT3      | 18375634  | HLA-B associated transcript-3 isoform a                          | Cytosolic | 1 | 0.77 | 0.64 | 2.09 | 0.82 | 0.69 | 2.65  |
| 2.34 | PRIM1     | 4506051   | DNA primase small subunit, 49kDa                                 | Cytosolic | 1 | 0.99 | 0.99 | 2.73 | 1.00 | 0.98 | 2.58  |
| 2.34 | HK1       | 15991833  | hexokinase 1 isoform HK1-td                                      | Cytosolic | 1 | 0.98 | 0.93 | 1.41 | 1.06 | 0.89 | 1.38  |
| 2.34 | LOC642209 | 89037070  | PREDICTED: similar to ribosomal protein L13a isoform 1           | Cytosolic | 1 | 1.22 | 0.49 | 1.25 | 1.26 | 0.45 | 1.25  |
| 2.33 | SFRS3     | 4506901   | splicing factor, arginine/serine-rich 3                          | Cytosolic | 2 | 1.10 | 0.83 | 1.38 | 1.02 | 0.90 | 1.38  |
| 2.33 | NAT10     | 13399322  | N-acetyltransferase-like protein                                 | Cytosolic | 1 | 0.97 | 0.96 | 2.09 | 0.88 | 0.66 | 2.09  |
| 2.33 | FANCD2    | 66528888  | Fanconi anemia complementation group D2 isoform b                | Cytosolic | 1 | 0.61 | 0.43 | 2.09 | 0.59 | 0.41 | 2.11  |
| 2.32 | GOT2      | 73486658  | aspartate aminotransferase 2 precursor                           | Cytosolic | 1 | 1.17 | 0.73 | 2.09 | 1.09 | 0.87 | 2.09  |
| 2.31 | FKBP10    | 21361895  | FK506 binding protein 10, 65 kDa                                 | Cytosolic | 1 | 0.96 | 0.96 | 2.09 | 1.10 | 0.83 | 2.09  |
| 2.31 | IPO4      | 62460637  | importin 4                                                       | Cytosolic | 1 | 0.91 | 0.92 | 1.82 | 0.81 | 0.67 | 1.49  |
| 2.29 | ERP44     | 52487191  | thioredoxin domain containing 4 (endoplasmic reticulum)          | Cytosolic | 1 | 1.07 | 0.84 | 2.09 | 1.02 | 0.93 | 2.09  |
| 2.29 | NIF3L1    | 56605983  | NIF3 NGG1 interacting factor 3-like 1                            | Cytosolic | 1 | 0.81 | 0.68 | 1.38 | 0.78 | 0.65 | 1.38  |
| 2.29 | POLR1A    | 103471997 | polymerase (RNA) I polypeptide A, 194kDa                         | Cytosolic | 1 | 0.53 | 0.36 | 2.09 | 0.61 | 0.44 | 2.11  |
| 2.27 | NOLC1     | 4758860   | nucleolar and coiled-body phosphoprotein 1                       | Cytosolic | 1 | 0.91 | 0.86 | 2.09 | 0.87 | 0.79 | 2.09  |
| 2.27 | SNRNP70   | 29568103  | U1 small nuclear ribonucleoprotein 70 kDa isoform a              | Cytosolic | 1 | 0.91 | 0.87 | 2.09 | 0.96 | 0.96 | 2.09  |
| 2.26 | SFRS14    | 62859987  | splicing factor, arginine/serine-rich 14                         | Cytosolic | 1 | 0.51 | 0.34 | 2.11 | 0.64 | 0.47 | 2.09  |
| 2.25 | NCBP1     | 4505343   | nuclear cap binding protein subunit 1, 80kDa                     | Cytosolic | 1 | 0.70 | 0.52 | 1.38 | 0.65 | 0.45 | 1.38  |
| 2.25 | ANP32A    | 5453880   | acidic (leucine-rich) nuclear phosphoprotein 32 family, member A | Cytosolic | 3 | 0.79 | 0.67 | 2.09 | 0.72 | 0.58 | 2.09  |
| 2.24 | RPLP1     | 4506669   | ribosomal protein P1 isoform 1                                   | Cytosolic | 1 | 1.67 | 0.68 | 1.41 | 1.79 | 0.62 | 1.31  |
| 2.23 | EEF1E1    | 4758862   | eukaryotic translation elongation factor 1 epsilon 1             | Cytosolic | 1 | 0.94 | 0.96 | 3.16 | 0.85 | 0.78 | 2.09  |
| 2.23 | SAFB2     | 7661936   | scaffold attachment factor B2                                    | Cytosolic | 1 | 0.95 | 0.92 | 2.09 | 0.79 | 0.67 | 2.09  |
| 2.22 | RPL30     | 4506631   | ribosomal protein L30                                            | Cytosolic | 1 | 1.15 | 0.59 | 1.33 | 1.04 | 0.80 | 1.37  |
| 2.22 | MAP2K2    | 13489054  | mitogen-activated protein kinase kinase 2                        | Cytosolic | 1 | 0.95 | 0.82 | 1.18 | 1.00 | 0.92 | 1.18  |
| 2.22 | SRRM1     | 42542379  | serine/arginine repetitive matrix 1                              | Cytosolic | 1 | 0.71 | 0.46 | 2.09 | 0.74 | 0.52 | 2.09  |
| 2.21 | PELP1     | 24415383  | proline-, glutamic acid-, leucine-rich protein 1                 | Cytosolic | 1 | 1.02 | 0.96 | 2.09 | 0.97 | 0.97 | 2.09  |
| 2.19 | RPL36AL   | 4506651   | ribosomal protein L36a-like protein                              | Cytosolic | 1 | 1.29 | 0.62 | 2.09 | 1.27 | 0.64 | 2.09  |

|      |           |           |                                                                           |           |    |      |      |       |      |      |       |
|------|-----------|-----------|---------------------------------------------------------------------------|-----------|----|------|------|-------|------|------|-------|
| 2.19 | RPL8      | 4506663   | ribosomal protein L8                                                      | Cytosolic | 1  | 1.29 | 0.61 | 1.16  | 1.31 | 0.60 | 1.16  |
| 2.19 | KIAA0406  | 24307961  | hypothetical protein LOC9675                                              | Cytosolic | 1  | 1.02 | 0.96 | 2.09  | 1.28 | 0.63 | 2.09  |
| 2.19 | CUL4A     | 57165424  | cullin 4A isoform 1                                                       | Cytosolic | 1  | 0.61 | 0.45 | 10.28 | 0.47 | 0.32 | 3.73  |
| 2.18 | PREP      | 41349456  | prolyl endopeptidase                                                      | Cytosolic | 1  | 1.47 | 0.39 | 6.43  | 1.66 | 0.36 | 2.94  |
| 2.17 | LOC644820 | 89060593  | PREDICTED: similar to eukaryotic translation elongation factor 1 beta 2   | Cytosolic | 1  | 1.03 | 0.80 | 2.03  | 1.16 | 0.61 | 1.60  |
| 2.17 | TPR       | 114155142 | nuclear pore complex-associated protein TPR                               | Cytosolic | 1  | 0.95 | 0.92 | 2.09  | 0.93 | 0.90 | 2.09  |
| 2.15 | UBQLN1    | 16753205  | ubiquilin 1 isoform 2                                                     | Cytosolic | 1  | 1.06 | 0.89 | 2.09  | 1.08 | 0.87 | 2.09  |
| 2.15 | SFRS8     | 23111062  | splicing factor, arginine/serine-rich 8                                   | Cytosolic | 1  | 0.85 | 0.71 | 1.38  | 0.93 | 0.93 | 1.89  |
| 2.15 | AAMP      | 55743075  | angio-associated, migratory cell protein                                  | Cytosolic | 1  | 1.12 | 0.81 | 2.09  | 0.94 | 0.92 | 2.09  |
| 2.15 | LOC645619 | 89035461  | PREDICTED: similar to Adenylate kinase isoenzyme 4, mitochondrial         | Cytosolic | 1  | 1.50 | 0.48 | 2.11  | 1.60 | 0.43 | 2.09  |
| 2.14 | SART1     | 10863889  | squamous cell carcinoma antigen recognized by T cells 1                   | Cytosolic | 1  | 0.69 | 0.52 | 2.09  | 0.49 | 0.33 | 2.11  |
| 2.14 | SUB1      | 19923784  | activated RNA polymerase II transcription cofactor 4                      | Cytosolic | 1  | 1.50 | 0.44 | 2.09  | 1.54 | 0.42 | 2.09  |
| 2.14 | DDX54     | 51094101  | DEAD (Asp-Glu-Ala-Asp) box polypeptide 54                                 | Cytosolic | 1  | 1.05 | 0.91 | 2.09  | 0.89 | 0.82 | 2.09  |
| 2.13 | COPB2     | 4758032   | coatamer protein complex, subunit beta 2 (beta prime)                     | Cytosolic | 1  | 0.82 | 0.73 | 2.09  | 0.80 | 0.67 | 2.09  |
| 2.13 | PSMC1     | 24430151  | proteasome 26S ATPase subunit 1                                           | Cytosolic | 1  | 0.97 | 0.98 | 4.70  | 0.99 | 0.95 | 4.25  |
| 2.13 | NTSDC1    | 38570156  | 5'-nucleotidase, cytosolic II-like 1 protein                              | Cytosolic | 1  | 1.09 | 0.95 | 1.96  | 1.21 | 0.55 | 1.38  |
| 2.13 | TBCD      | 41350333  | beta-tubulin cofactor D                                                   | Cytosolic | 1  | 1.57 | 0.45 | 2.09  | 1.31 | 0.57 | 4.83  |
| 2.13 | C6orf115  | 113418321 | PREDICTED: similar to Protein C6orf115                                    | Cytosolic | 1  | 2.99 | 0.23 | 1.89  | 3.28 | 0.23 | 1.84  |
| 2.12 | NUDT5     | 37594464  | nudix-type motif 5                                                        | Cytosolic | 1  | 1.07 | 0.86 | 1.24  | 1.20 | 0.70 | 1.19  |
| 2.12 | PTRF      | 42734430  | polymerase I and transcript release factor                                | Cytosolic | 1  | 1.11 | 0.82 | 2.09  | 0.97 | 0.97 | 2.09  |
| 2.11 | DRG1      | 4758796   | developmentally regulated GTP binding protein 1                           | Cytosolic | 1  | 1.02 | 0.89 | 2.09  | 1.02 | 0.88 | 2.09  |
| 2.11 | BRX1      | 55770900  | BRX1                                                                      | Cytosolic | 1  | 0.69 | 0.48 | 2.09  | 0.82 | 0.67 | 2.09  |
| 2.1  | MYBBP1A   | 7657351   | MYB binding protein 1a                                                    | Cytosolic | 1  | 1.20 | 0.67 | 2.38  | 1.21 | 0.72 | 15.70 |
| 2.1  | AASDHPPT  | 20357568  | aminoadipate-semialdehyde dehydrogenase-phosphopantetheinyl transferase   | Cytosolic | 1  | 0.98 | 0.93 | 2.58  | 1.05 | 0.92 | 2.09  |
| 2.1  | UBA3      | 38045942  | ubiquitin-activating enzyme E1C isoform 1                                 | Cytosolic | 1  | 0.91 | 0.80 | 3.22  | 1.01 | 0.96 | 2.09  |
| 2.1  | CAPNS1    | 51599151  | calpain, small subunit 1                                                  | Cytosolic | 0  | 1.09 | 0.75 | 1.27  | 1.06 | 0.90 | 1.25  |
| 2.09 | LAMB1     | 4504951   | laminin, beta 1 precursor                                                 | Cytosolic | 1  | 1.41 | 0.53 | 2.09  | 1.37 | 0.56 | 2.09  |
| 2.09 | STAT1     | 6274552   | signal transducer and activator of transcription 1 isoform alpha          | Cytosolic | 1  | 1.02 | 0.95 | 2.09  | 0.93 | 0.90 | 2.09  |
| 2.09 | UBE2T     | 7661808   | ubiquitin-conjugating enzyme E2T (putative)                               | Cytosolic | 1  | 0.71 | 0.45 | 2.09  | 0.73 | 0.48 | 2.49  |
| 2.09 | SMS       | 21264341  | spermine synthase                                                         | Cytosolic | 1  | 1.05 | 0.81 | 1.61  | 1.03 | 0.92 | 1.45  |
| 2.09 | PPP2R4    | 30065649  | protein phosphatase 2A, regulatory subunit B' isoform d                   | Cytosolic | 1  | 0.71 | 0.47 | 1.38  | 0.70 | 0.45 | 1.38  |
| 2.09 | PMPCB     | 94538354  | mitochondrial processing peptidase beta subunit precursor                 | Cytosolic | 1  | 0.74 | 0.64 | 1.25  | 0.86 | 0.80 | 1.25  |
| 2.08 | ARFGEF1   | 51479145  | brefeldin A-inhibited guanine nucleotide-exchange protein 1               | Cytosolic | 1  | 1.17 | 0.67 | 1.34  | 1.17 | 0.72 | 1.31  |
| 2.07 | OAT       | 4557809   | ornithine aminotransferase precursor                                      | Cytosolic | 1  | 1.37 | 0.55 | 2.09  | 1.43 | 0.53 | 2.09  |
| 2.07 | UBE2C     | 5902146   | ubiquitin-conjugating enzyme E2C isoform 1                                | Cytosolic | 1  | 0.88 | 0.80 | 2.09  | 0.82 | 0.70 | 2.09  |
| 2.07 | FUBP1     | 17402900  | far upstream element-binding protein                                      | Cytosolic | 1  | 0.99 | 0.98 | 1.14  | 0.99 | 0.87 | 1.19  |
| 2.07 | APFH      | 23510451  | N-acylaminoacyl-peptide hydrolase                                         | Cytosolic | 1  | 1.16 | 0.74 | 2.31  | 0.96 | 0.96 | 6.79  |
| 2.07 | LOC653888 | 89026256  | PREDICTED: similar to Actin-related protein 2/3 complex subunit 1B        | Cytosolic | 1  | 0.95 | 0.92 | 2.09  | 1.09 | 0.86 | 2.09  |
| 2.06 | GDI1      | 4503971   | GDP dissociation inhibitor 1                                              | Cytosolic | 5  | 1.06 | 0.88 | 1.25  | 1.07 | 0.84 | 1.29  |
| 2.06 | EIF4A3    | 7661920   | eukaryotic translation initiation factor 4A, isoform 3                    | Cytosolic | 3  | 0.97 | 0.91 | 1.42  | 0.96 | 0.85 | 1.56  |
| 2.06 | DDX39     | 21040371  | DEAD (Asp-Glu-Ala-Asp) box polypeptide 39                                 | Cytosolic | 10 | 0.94 | 0.91 | 2.09  | 0.99 | 0.99 | 2.09  |
| 2.06 | TNPO2     | 48675813  | transportin 2 (importin 3, karyopherin beta 2b)                           | Cytosolic | 2  | 0.91 | 0.87 | 2.09  | 0.83 | 0.73 | 2.09  |
| 2.06 | SNRPA1    | 50593002  | small nuclear ribonucleoprotein polypeptide A'                            | Cytosolic | 1  | 0.83 | 0.73 | 2.09  | 0.63 | 0.46 | 2.11  |
| 2.06 | GTPBP1    | 82546879  | GTP binding protein 1                                                     | Cytosolic | 1  | 1.08 | 0.87 | 2.09  | 1.05 | 0.91 | 2.09  |
| 2.05 | EEF1A2    | 4503475   | eukaryotic translation elongation factor 1 alpha 2                        | Cytosolic | 9  | 0.82 | 0.72 | 2.09  | 0.68 | 0.51 | 2.09  |
| 2.05 | OXSRI     | 4826878   | oxidative-stress responsive 1                                             | Cytosolic | 1  | 0.74 | 0.54 | 2.09  | 0.80 | 0.68 | 2.09  |
| 2.05 | PGLS      | 6912586   | 6-phosphogluconolactonase                                                 | Cytosolic | 1  | 0.74 | 0.52 | 1.27  | 0.87 | 0.68 | 1.60  |
| 2.05 | IPO9      | 21361659  | importin 9                                                                | Cytosolic | 1  | 0.67 | 0.49 | 2.11  | 0.73 | 0.58 | 2.11  |
| 2.05 | MMS19     | 31543207  | MMS19-like (MET18 homolog, S. cerevisiae)                                 | Cytosolic | 1  | 0.93 | 0.90 | 2.09  | 1.34 | 0.58 | 2.11  |
| 2.05 | ENAH      | 56549694  | enabled homolog isoform a                                                 | Cytosolic | 1  | 0.72 | 0.56 | 2.38  | 0.75 | 0.63 | 3.50  |
| 2.05 | NAE1      | 66363688  | amyloid beta precursor protein-binding protein 1 isoform c                | Cytosolic | 1  | 0.94 | 0.90 | 2.09  | 0.88 | 0.81 | 2.09  |
| 2.05 | KPNA1     | 88758611  | karyopherin alpha 1                                                       | Cytosolic | 1  | 0.99 | 1.00 | 1.38  | 1.03 | 0.96 | 1.38  |
| 2.04 | ARF3      | 4502203   | ADP-ribosylation factor 3                                                 | Cytosolic | 2  | 0.91 | 0.86 | 1.15  | 0.92 | 0.86 | 1.15  |
| 2.04 | HPRT1     | 4504483   | hypoxanthine phosphoribosyltransferase 1                                  | Cytosolic | 1  | 1.57 | 0.45 | 2.09  | 1.63 | 0.42 | 2.09  |
| 2.04 | AKAP12    | 21493022  | A-kinase anchor protein 12 isoform 1                                      | Cytosolic | 1  | 1.21 | 0.70 | 2.09  | 1.09 | 0.84 | 2.09  |
| 2.04 | HN1L      | 21700763  | chromosome 16 open reading frame 34                                       | Cytosolic | 1  | 1.42 | 0.53 | 2.11  | 1.38 | 0.55 | 2.09  |
| 2.04 | ADNP      | 31563503  | activity-dependent neuroprotector                                         | Cytosolic | 1  | 0.99 | 1.00 | 2.09  | 0.82 | 0.72 | 2.09  |
| 2.04 | SLC3A2    | 65506891  | solute carrier family 3 , member 2 isoform c                              | Cytosolic | 1  | 1.75 | 0.38 | 2.11  | 1.54 | 0.45 | 13.06 |
| 2.03 | ETF1      | 4759034   | eukaryotic translation termination factor 1                               | Cytosolic | 1  | 1.49 | 0.49 | 2.09  | 1.45 | 0.51 | 2.11  |
| 2.03 | NAMPT     | 5031977   | visfatin precursor                                                        | Cytosolic | 1  | 0.76 | 0.62 | 2.09  | 0.81 | 0.70 | 2.09  |
| 2.03 | PPP2R5D   | 5453954   | delta isoform of regulatory subunit B56, protein phosphatase 2A isoform 1 | Cytosolic | 1  | 1.14 | 0.79 | 2.09  | 1.06 | 0.89 | 2.09  |

|      |           |           |                                                                                               |           |    |      |      |      |      |      |      |
|------|-----------|-----------|-----------------------------------------------------------------------------------------------|-----------|----|------|------|------|------|------|------|
| 2.03 | GTF3C3    | 6912398   | general transcription factor IIIC, polypeptide 3, 102kDa                                      | Cytosolic | 1  | 0.90 | 0.86 | 2.09 | 0.84 | 0.74 | 2.09 |
| 2.03 | CLIC4     | 7330335   | chloride intracellular channel 4                                                              | Cytosolic | 1  | 0.95 | 0.92 | 2.09 | 0.67 | 0.50 | 2.09 |
| 2.03 | DDX19A    | 8922886   | DDX19-like protein                                                                            | Cytosolic | 1  | 0.83 | 0.73 | 2.09 | 0.99 | 1.00 | 2.09 |
| 2.03 | SMARCAD1  | 14149730  | SWI/SNF-related, matrix-associated actin-dependent regulator of chromatin, subfamily a, conta | Cytosolic | 1  | 1.28 | 0.64 | 2.09 | 1.21 | 0.71 | 2.09 |
| 2.03 | ARHGEF2   | 15011974  | rho/rac guanine nucleotide exchange factor 2                                                  | Cytosolic | 1  | 0.77 | 0.64 | 2.09 | 0.71 | 0.55 | 2.09 |
| 2.03 | BCCIP     | 17402871  | BRCA2 and CDKN1A-interacting protein isoform BCCIPbeta                                        | Cytosolic | 1  | 1.08 | 0.87 | 2.09 | 1.09 | 0.86 | 2.09 |
| 2.03 | WHSC2     | 19913363  | Wolf-Hirschhorn syndrome candidate 2 protein                                                  | Cytosolic | 1  | 0.80 | 0.72 | 2.09 | 0.85 | 0.70 | 2.44 |
| 2.03 | CTPS2     | 28559085  | cytidine triphosphate synthase II                                                             | Cytosolic | 2  | 0.74 | 0.59 | 2.09 | 0.95 | 0.93 | 2.09 |
| 2.03 | QRICH1    | 38570099  | glutamine-rich 1                                                                              | Cytosolic | 1  | 0.68 | 0.51 | 2.11 | 1.15 | 0.77 | 2.09 |
| 2.03 | EDC4      | 45827771  | autoantigen RCD8                                                                              | Cytosolic | 1  | 0.88 | 0.81 | 2.09 | 0.74 | 0.59 | 2.09 |
| 2.03 | IGFBP2    | 55925576  | insulin-like growth factor binding protein 2, 36kDa                                           | Cytosolic | 1  | 1.32 | 0.59 | 2.09 | 1.17 | 0.74 | 2.09 |
| 2.03 | ATP6V1E1  | 87159816  | vacuolar H+ ATPase E1 isoform b                                                               | Cytosolic | 1  | 1.00 | 0.97 | 4.88 | 0.95 | 0.89 | 4.57 |
| 2.03 | MYL6      | 88999583  | myosin, light chain 6, alkali, smooth muscle and non-muscle isoform 2                         | Cytosolic | 3  | 1.28 | 0.78 | 1.31 | 1.82 | 0.55 | 1.24 |
| 2.03 | HADH      | 94557308  | L-3-hydroxyacyl-Coenzyme A dehydrogenase precursor                                            | Cytosolic | 1  | 0.89 | 0.82 | 2.09 | 0.87 | 0.80 | 2.09 |
| 2.03 | CDV3      | 113415228 | PREDICTED: similar to CDV3 homolog                                                            | Cytosolic | 1  | 1.13 | 0.80 | 2.09 | 1.14 | 0.78 | 2.09 |
| 2.03 | YTHDF3    | 116235460 | YTH domain family, member 3                                                                   | Cytosolic | 1  | 0.90 | 0.82 | 2.11 | 0.95 | 0.96 | 2.58 |
| 2.02 | PSMD5     | 4826952   | proteasome 26S non-ATPase subunit 5                                                           | Cytosolic | 1  | 0.86 | 0.78 | 2.09 | 1.02 | 0.95 | 2.09 |
| 2.02 | TSNAX     | 5174731   | translin-associated factor X                                                                  | Cytosolic | 1  | 1.03 | 0.95 | 2.11 | 0.85 | 0.75 | 2.09 |
| 2.02 | NEDD8     | 5453760   | neural precursor cell expressed, developmentally down-regulated 8                             | Cytosolic | 1  | 0.98 | 0.96 | 2.09 | 1.07 | 0.85 | 2.09 |
| 2.02 | SUGT1     | 5730041   | suppressor of G2 allele of SKP1                                                               | Cytosolic | 1  | 0.87 | 0.80 | 2.09 | 0.76 | 0.62 | 2.09 |
| 2.02 | SLC4A1AP  | 8922557   | solute carrier family 4 (anion exchanger), member 1, adaptor protein                          | Cytosolic | 1  | 0.71 | 0.55 | 2.09 | 0.99 | 1.00 | 2.09 |
| 2.02 | ARRB1     | 10880136  | arrestin beta 1 isoform A                                                                     | Cytosolic | 1  | 1.39 | 0.54 | 2.09 | 1.57 | 0.45 | 2.09 |
| 2.02 | POLR1E    | 11968047  | RNA polymerase I associated factor 53                                                         | Cytosolic | 1  | 1.06 | 0.90 | 2.09 | 0.96 | 0.95 | 2.09 |
| 2.02 | SH3BGL3   | 13775198  | SH3 domain binding glutamic acid-rich protein like 3                                          | Cytosolic | 1  | 0.52 | 0.35 | 2.11 | 0.51 | 0.34 | 2.09 |
| 2.02 | SURF2     | 19557687  | surfeit 2                                                                                     | Cytosolic | 1  | 0.96 | 0.96 | 2.09 | 1.05 | 0.91 | 2.09 |
| 2.02 | RACGAP1   | 21361397  | Rac GTPase activating protein 1                                                               | Cytosolic | 1  | 1.39 | 0.54 | 2.09 | 1.32 | 0.60 | 2.11 |
| 2.02 | HELLS     | 21914927  | helicase, lymphoid-specific                                                                   | Cytosolic | 1  | 1.09 | 0.86 | 2.09 | 1.11 | 0.82 | 2.09 |
| 2.02 | POLR1B    | 33469941  | RNA polymerase I polypeptide B                                                                | Cytosolic | 1  | 0.74 | 0.59 | 2.09 | 0.55 | 0.37 | 2.09 |
| 2.02 | KIAA1429  | 33946282  | hypothetical protein LOC25962 isoform 1                                                       | Cytosolic | 1  | 0.56 | 0.39 | 2.11 | 0.50 | 0.33 | 2.09 |
| 2.02 | G3BP2     | 45359849  | Ras-GTPase activating protein SH3 domain-binding protein 2 isoform a                          | Cytosolic | 2  | 1.16 | 0.76 | 2.09 | 1.18 | 0.73 | 2.09 |
| 2.02 | TUBA3E    | 46409270  | tubulin, alpha 3e                                                                             | Cytosolic | 20 | 1.06 | 0.82 | 1.09 | 1.05 | 0.86 | 1.09 |
| 2.02 | ACTR2     | 53692187  | actin-related protein 2 isoform a                                                             | Cytosolic | 1  | 1.02 | 0.99 | 1.49 | 0.98 | 0.97 | 1.38 |
| 2.02 | NUMA1     | 71361682  | nuclear mitotic apparatus protein 1                                                           | Cytosolic | 1  | 0.76 | 0.62 | 2.11 | 0.90 | 0.83 | 2.09 |
| 2.02 | CYFIP2    | 82617634  | cytoplasmic FMR1 interacting protein 2                                                        | Cytosolic | 1  | 1.08 | 0.86 | 2.09 | 1.36 | 0.57 | 2.09 |
| 2.02 | KIAA0664  | 87162455  | hypothetical protein LOC23277                                                                 | Cytosolic | 1  | 1.01 | 0.97 | 2.09 | 1.09 | 0.85 | 2.09 |
| 2.02 | LOC646195 | 89035017  | PREDICTED: similar to 40S ribosomal protein S28 isoform 2                                     | Cytosolic | 1  | 1.08 | 0.89 | 2.09 | 0.95 | 0.82 | 2.09 |
| 2.01 | DNMT1     | 4503351   | DNA (cytosine-5-)-methyltransferase 1                                                         | Cytosolic | 1  | 1.22 | 0.68 | 2.09 | 1.03 | 0.94 | 2.09 |
| 2.01 | EIF4E     | 4503535   | eukaryotic translation initiation factor 4E                                                   | Cytosolic | 1  | 1.00 | 0.98 | 2.09 | 0.99 | 0.99 | 2.09 |
| 2.01 | FADD      | 4505229   | Fas-associated via death domain                                                               | Cytosolic | 1  | 1.13 | 0.80 | 2.09 | 1.06 | 0.90 | 2.09 |
| 2.01 | PDXK      | 4505701   | pyridoxal kinase                                                                              | Cytosolic | 1  | 0.86 | 0.77 | 2.09 | 0.95 | 0.93 | 2.09 |
| 2.01 | PSMB2     | 4506195   | proteasome beta 2 subunit                                                                     | Cytosolic | 1  | 1.26 | 0.63 | 1.25 | 1.11 | 0.79 | 1.25 |
| 2.01 | RPL39     | 4506647   | ribosomal protein L39                                                                         | Cytosolic | 2  | 1.04 | 0.89 | 1.38 | 1.12 | 0.81 | 1.38 |
| 2.01 | HNRNPA0   | 5803036   | heterogeneous nuclear ribonucleoprotein A0                                                    | Cytosolic | 2  | 0.90 | 0.89 | 2.09 | 0.86 | 0.79 | 2.11 |
| 2.01 | SDAD1     | 8922467   | SDA1 domain containing 1                                                                      | Cytosolic | 1  | 0.97 | 0.97 | 2.09 | 0.97 | 0.97 | 2.09 |
| 2.01 | LYAR      | 8923398   | hypothetical protein FLJ20425                                                                 | Cytosolic | 1  | 0.69 | 0.53 | 2.11 | 0.43 | 0.28 | 2.09 |
| 2.01 | SH3GLB2   | 9910352   | SH3-containing protein SH3GLB2                                                                | Cytosolic | 1  | 0.86 | 0.77 | 2.09 | 1.19 | 0.71 | 2.09 |
| 2.01 | RPRD1B    | 11034845  | hypothetical protein LOC58490                                                                 | Cytosolic | 1  | 0.87 | 0.77 | 1.57 | 0.78 | 0.63 | 1.38 |
| 2.01 | USP15     | 14149627  | ubiquitin specific protease 15                                                                | Cytosolic | 1  | 0.87 | 0.79 | 2.09 | 0.96 | 0.96 | 2.09 |
| 2.01 | RPL36     | 16117796  | ribosomal protein L36                                                                         | Cytosolic | 1  | 1.47 | 0.49 | 2.09 | 1.42 | 0.52 | 2.09 |
| 2.01 | C21orf70  | 17158023  | hypothetical protein LOC85395                                                                 | Cytosolic | 1  | 1.16 | 0.75 | 2.09 | 1.10 | 0.83 | 2.09 |
| 2.01 | PTPN12    | 18375652  | protein tyrosine phosphatase, non-receptor type 12                                            | Cytosolic | 1  | 1.03 | 0.95 | 2.09 | 0.98 | 0.99 | 2.09 |
| 2.01 | DHX36     | 18497286  | DEAH (Asp-Glu-Ala-His) box polypeptide 36                                                     | Cytosolic | 1  | 0.92 | 0.88 | 2.09 | 0.91 | 0.87 | 2.09 |
| 2.01 | SCP2      | 19923233  | sterol carrier protein 2 isoform 1 proprotein                                                 | Cytosolic | 1  | 0.78 | 0.65 | 2.09 | 0.75 | 0.61 | 2.09 |
| 2.01 | PRMT5     | 20070220  | protein arginine methyltransferase 5 isoform a                                                | Cytosolic | 1  | 1.06 | 0.90 | 2.09 | 1.17 | 0.75 | 2.09 |
| 2.01 | GEMIN5    | 22001417  | gemin 5                                                                                       | Cytosolic | 1  | 1.16 | 0.76 | 2.09 | 1.14 | 0.79 | 2.09 |
| 2.01 | C17orf79  | 22129784  | hypothetical protein LOC55352                                                                 | Cytosolic | 1  | 0.54 | 0.36 | 2.09 | 0.64 | 0.46 | 2.09 |
| 2.01 | HIBADH    | 23308751  | beta-hydroxyisobutyrate dehydrogenase                                                         | Cytosolic | 1  | 0.78 | 0.65 | 2.09 | 0.79 | 0.66 | 2.09 |
| 2.01 | NUP50     | 24497451  | nucleoporin 50kDa isoform b                                                                   | Cytosolic | 1  | 0.83 | 0.73 | 2.09 | 0.97 | 0.97 | 2.09 |
| 2.01 | DAZAP1    | 25470890  | DAZ associated protein 1 isoform a                                                            | Cytosolic | 1  | 0.69 | 0.52 | 2.11 | 0.75 | 0.61 | 2.11 |
| 2.01 | ABCF2     | 27881506  | ATP-binding cassette, sub-family F, member 2 isoform a                                        | Cytosolic | 1  | 0.97 | 0.99 | 3.05 | 0.99 | 0.97 | 2.36 |
| 2.01 | RIC8A     | 27883866  | resistance to inhibitors of cholinesterase 8 homolog A                                        | Cytosolic | 1  | 1.05 | 0.92 | 2.09 | 1.06 | 0.89 | 2.09 |

|      |          |           |                                                                                  |           |    |      |      |      |      |      |      |
|------|----------|-----------|----------------------------------------------------------------------------------|-----------|----|------|------|------|------|------|------|
| 2.01 | ITPA     | 31657144  | inosine triphosphatase isoform b                                                 | Cytosolic | 1  | 1.16 | 0.77 | 1.38 | 1.14 | 0.77 | 1.38 |
| 2.01 | PKM2     | 33286422  | pyruvate kinase 3 isoform 2                                                      | Cytosolic | 27 | 0.74 | 0.59 | 2.11 | 0.70 | 0.55 | 2.11 |
| 2.01 | NFKBIL2  | 34304358  | I-kappa-B-related protein                                                        | Cytosolic | 1  | 0.60 | 0.42 | 2.09 | 0.93 | 0.90 | 2.09 |
| 2.01 | RPF2     | 39930469  | brix domain containing 1                                                         | Cytosolic | 1  | 0.90 | 0.84 | 2.09 | 0.77 | 0.64 | 2.11 |
| 2.01 | PSME4    | 40788003  | proteasome (prosome, macropain) activator subunit 4                              | Cytosolic | 1  | 0.99 | 1.00 | 2.09 | 1.11 | 0.82 | 2.09 |
| 2.01 | CAPRN1   | 42558250  | membrane component chromosome 11 surface marker 1 isoform 1                      | Cytosolic | 1  | 0.89 | 0.82 | 2.09 | 0.94 | 0.91 | 2.09 |
| 2.01 | ATP5A1   | 50345984  | ATP synthase, H+ transporting, mitochondrial F1 complex, alpha subunit precursor | Cytosolic | 1  | 1.53 | 0.47 | 2.11 | 1.26 | 0.65 | 2.11 |
| 2.01 | C17orf49 | 52856421  | hypothetical protein LOC124944                                                   | Cytosolic | 1  | 1.04 | 0.92 | 2.09 | 1.02 | 0.96 | 2.09 |
| 2.01 | 7-Sep    | 58535461  | cell division cycle 10 isoform 2                                                 | Cytosolic | 1  | 1.24 | 0.68 | 2.09 | 1.08 | 0.87 | 2.09 |
| 2.01 | UZAF1    | 68800128  | U2 small nuclear RNA auxiliary factor 1 isoform b                                | Cytosolic | 2  | 0.64 | 0.47 | 2.11 | 0.65 | 0.48 | 2.11 |
| 2.01 | UROD     | 71051616  | uroporphyrinogen decarboxylase                                                   | Cytosolic | 1  | 1.57 | 0.45 | 2.09 | 1.39 | 0.54 | 2.09 |
| 2.01 | CIAPIN1  | 89274169  | cytokine induced apoptosis inhibitor 1                                           | Cytosolic | 1  | 1.21 | 0.69 | 2.09 | 1.10 | 0.84 | 2.09 |
| 2.01 | FUBP3    | 113421227 | PREDICTED: similar to Far upstream element-binding protein 3                     | Cytosolic | 1  | 0.99 | 0.97 | 2.42 | 1.07 | 0.88 | 2.09 |
| 2.01 | CHERP    | 119226260 | calcium homeostasis endoplasmic reticulum protein                                | Cytosolic | 1  | 0.69 | 0.52 | 2.09 | 0.83 | 0.73 | 2.09 |
| 2.01 | IK       | 125988409 | RED protein                                                                      | Cytosolic | 1  | 0.82 | 0.66 | 2.09 | 0.70 | 0.55 | 2.91 |
| 2    | COX4I1   | 4502981   | cytochrome c oxidase subunit IV isoform 1 precursor                              | Cytosolic | 1  | 0.85 | 0.76 | 2.11 | 0.82 | 0.71 | 2.11 |
| 2    | CSRP2    | 4503101   | cysteine and glycine-rich protein 2                                              | Cytosolic | 1  | 1.10 | 0.84 | 2.09 | 0.71 | 0.55 | 2.09 |
| 2    | CSTB     | 4503117   | cystatin B                                                                       | Cytosolic | 1  | 0.93 | 0.88 | 1.25 | 0.84 | 0.72 | 1.25 |
| 2    | DCK      | 4503269   | deoxycytidine kinase                                                             | Cytosolic | 1  | 1.10 | 0.83 | 2.09 | 0.86 | 0.77 | 2.09 |
| 2    | EIF3D    | 4503523   | eukaryotic translation initiation factor 3 subunit 7                             | Cytosolic | 1  | 1.14 | 0.78 | 2.09 | 1.20 | 0.71 | 2.09 |
| 2    | ETFA     | 4503607   | electron transfer flavoprotein, alpha polypeptide                                | Cytosolic | 1  | 0.92 | 0.94 | 2.15 | 0.93 | 0.88 | 2.09 |
| 2    | H2AFX    | 4504253   | H2A histone family, member X                                                     | Cytosolic | 1  | 0.96 | 0.96 | 1.15 | 0.89 | 0.83 | 1.15 |
| 2    | CD99     | 4505183   | CD99 antigen                                                                     | Cytosolic | 1  | 0.47 | 0.31 | 2.11 | 0.26 | 0.18 | 2.13 |
| 2    | PFN2     | 4505751   | profilin 2 isoform b                                                             | Cytosolic | 1  | 1.10 | 0.83 | 2.09 | 0.97 | 0.98 | 2.09 |
| 2    | PSMB1    | 4506193   | proteasome beta 1 subunit                                                        | Cytosolic | 1  | 1.09 | 0.84 | 2.09 | 0.99 | 0.99 | 2.09 |
| 2    | PSMB7    | 4506203   | proteasome beta 7 subunit proprotein                                             | Cytosolic | 1  | 1.03 | 0.93 | 2.09 | 0.99 | 0.99 | 2.09 |
| 2    | PSMD10   | 4506217   | proteasome 26S non-ATPase subunit 10 isoform 1                                   | Cytosolic | 1  | 0.82 | 0.70 | 2.09 | 0.81 | 0.70 | 2.09 |
| 2    | RPA3     | 4506587   | replication protein A3, 14kDa                                                    | Cytosolic | 1  | 0.73 | 0.55 | 2.09 | 0.77 | 0.58 | 2.09 |
| 2    | RPS21    | 4506699   | ribosomal protein S21                                                            | Cytosolic | 2  | 1.36 | 0.57 | 1.18 | 1.45 | 0.55 | 1.19 |
| 2    | RPS27    | 4506711   | ribosomal protein S27                                                            | Cytosolic | 1  | 1.14 | 0.79 | 1.38 | 1.13 | 0.79 | 1.38 |
| 2    | SNRPE    | 4507129   | small nuclear ribonucleoprotein polypeptide E                                    | Cytosolic | 1  | 0.85 | 0.59 | 1.38 | 0.88 | 0.59 | 1.51 |
| 2    | SPARC    | 4507171   | secreted protein, acidic, cysteine-rich (osteonectin)                            | Cytosolic | 1  | 0.56 | 0.38 | 2.11 | 0.48 | 0.31 | 2.11 |
| 2    | UGDH     | 4507813   | UDP-glucose dehydrogenase                                                        | Cytosolic | 1  | 1.54 | 0.41 | 2.38 | 1.31 | 0.50 | 3.87 |
| 2    | DRG2     | 4557537   | developmentally regulated GTP binding protein 2                                  | Cytosolic | 1  | 1.49 | 0.49 | 2.09 | 1.75 | 0.38 | 2.11 |
| 2    | NME1     | 4557797   | non-metastatic cells 1, protein (NM23A) expressed in isoform b                   | Cytosolic | 12 | 0.86 | 0.82 | 2.11 | 0.95 | 0.94 | 2.91 |
| 2    | ATOX1    | 4757804   | antioxidant protein 1                                                            | Cytosolic | 1  | 0.87 | 0.80 | 2.09 | 1.20 | 0.71 | 2.09 |
| 2    | DFFA     | 4758148   | DNA fragmentation factor, 45kDa, alpha polypeptide isoform 1                     | Cytosolic | 1  | 1.39 | 0.53 | 1.38 | 1.34 | 0.56 | 1.54 |
| 2    | FABP3    | 4758328   | fatty acid binding protein 3                                                     | Cytosolic | 1  | 0.60 | 0.42 | 2.11 | 0.62 | 0.44 | 2.09 |
| 2    | FKBP5    | 4758384   | FK506 binding protein 5                                                          | Cytosolic | 1  | 0.74 | 0.60 | 2.09 | 1.13 | 0.80 | 2.09 |
| 2    | GMFB     | 4758442   | glia maturation factor, beta                                                     | Cytosolic | 1  | 1.42 | 0.51 | 2.09 | 1.37 | 0.56 | 2.65 |
| 2    | HDGF     | 4758516   | hepatoma-derived growth factor (high-mobility group protein 1-like)              | Cytosolic | 1  | 0.53 | 0.35 | 2.09 | 0.52 | 0.33 | 2.09 |
| 2    | POLR1C   | 4759046   | RNA polymerase I subunit isoform 2                                               | Cytosolic | 1  | 0.90 | 0.83 | 2.09 | 0.70 | 0.54 | 2.11 |
| 2    | SFRS11   | 4759100   | splicing factor, arginine/serine-rich 11                                         | Cytosolic | 1  | 0.70 | 0.55 | 2.09 | 0.68 | 0.51 | 2.11 |
| 2    | TSN      | 4759270   | translin                                                                         | Cytosolic | 1  | 0.70 | 0.60 | 1.18 | 0.69 | 0.56 | 1.28 |
| 2    | ISG15    | 4826774   | interferon, alpha-inducible protein (clone IFI-15K)                              | Cytosolic | 1  | 1.19 | 0.73 | 2.11 | 1.21 | 0.69 | 2.09 |
| 2    | CRKL     | 4885153   | v-crk sarcoma virus CT10 oncogene homolog (avian)-like                           | Cytosolic | 1  | 1.13 | 0.76 | 2.09 | 1.13 | 0.74 | 2.63 |
| 2    | DNAJA2   | 5031741   | Dnaj subfamily A member 2                                                        | Cytosolic | 1  | 1.18 | 0.73 | 2.09 | 1.01 | 0.97 | 2.09 |
| 2    | IMPA1    | 5031789   | inositol(myo)-1(or 4)-monophosphatase 1                                          | Cytosolic | 1  | 1.57 | 0.37 | 2.65 | 1.72 | 0.35 | 2.11 |
| 2    | AKR1A1   | 5174391   | aldo-keto reductase family 1, member A1                                          | Cytosolic | 3  | 0.94 | 0.91 | 2.09 | 0.98 | 0.98 | 2.09 |
| 2    | PSMD4    | 5292161   | proteasome 26S non-ATPase subunit 4 isoform 1                                    | Cytosolic | 1  | 0.98 | 0.99 | 2.09 | 0.98 | 0.97 | 2.09 |
| 2    | CAPZA2   | 5453599   | capping protein (actin filament) muscle Z-line, alpha 2                          | Cytosolic | 1  | 0.71 | 0.60 | 3.53 | 0.75 | 0.59 | 6.08 |
| 2    | MYL12A   | 5453740   | myosin regulatory light chain MRCL3                                              | Cytosolic | 1  | 1.02 | 0.96 | 2.09 | 1.00 | 0.98 | 2.09 |
| 2    | PIN1     | 5453898   | protein (peptidyl-prolyl cis/trans isomerase) NIMA-interacting 1                 | Cytosolic | 1  | 1.18 | 0.73 | 2.09 | 1.34 | 0.58 | 2.11 |
| 2    | PPP5C    | 5453958   | protein phosphatase 5, catalytic subunit                                         | Cytosolic | 1  | 1.05 | 0.87 | 1.26 | 1.03 | 0.94 | 1.18 |
| 2    | C6orf108 | 5454002   | putative c-Myc-responsive isoform 1                                              | Cytosolic | 1  | 0.65 | 0.48 | 2.11 | 0.66 | 0.49 | 2.09 |
| 2    | SF3A3    | 5803167   | splicing factor 3a, subunit 3                                                    | Cytosolic | 1  | 0.67 | 0.48 | 1.38 | 0.72 | 0.55 | 1.38 |
| 2    | PWP1     | 5902034   | periodic tryptophan protein 1                                                    | Cytosolic | 1  | 0.90 | 0.77 | 1.27 | 0.91 | 0.78 | 1.18 |
| 2    | SNRPD1   | 5902102   | small nuclear ribonucleoprotein D1 polypeptide 16kDa                             | Cytosolic | 1  | 0.82 | 0.71 | 2.11 | 0.82 | 0.72 | 2.11 |
| 2    | H2AFV    | 6912616   | H2A histone family, member V isoform 1                                           | Cytosolic | 1  | 0.83 | 0.73 | 2.09 | 0.76 | 0.62 | 2.09 |
| 2    | PDCD6    | 7019485   | programmed cell death 6                                                          | Cytosolic | 1  | 0.79 | 0.67 | 2.11 | 0.90 | 0.85 | 2.09 |
| 2    | PPIL1    | 7706339   | peptidylprolyl isomerase-like 1                                                  | Cytosolic | 1  | 0.92 | 0.88 | 2.09 | 1.36 | 0.57 | 2.09 |

|   |           |          |                                                                    |           |    |      |      |      |      |      |      |
|---|-----------|----------|--------------------------------------------------------------------|-----------|----|------|------|------|------|------|------|
| 2 | LSM8      | 7706425  | U6 snRNA-associated Sm-like protein Lsm8                           | Cytosolic | 1  | 0.82 | 0.72 | 2.09 | 0.90 | 0.86 | 2.11 |
| 2 | VPS29     | 7706441  | vacuolar protein sorting 29 isoform 1                              | Cytosolic | 1  | 1.43 | 0.52 | 2.11 | 1.58 | 0.44 | 2.09 |
| 2 | WBP11     | 7706501  | WW domain binding protein 11                                       | Cytosolic | 1  | 1.38 | 0.55 | 2.09 | 1.54 | 0.46 | 2.09 |
| 2 | MED18     | 8923053  | mediator of RNA polymerase II transcription, subunit 18 homolog    | Cytosolic | 1  | 0.57 | 0.39 | 2.09 | 0.73 | 0.65 | 3.60 |
| 2 | C20orf11  | 8923557  | chromosome 20 open reading frame 11                                | Cytosolic | 2  | 0.59 | 0.41 | 2.11 | 0.86 | 0.77 | 2.09 |
| 2 | EXOSC4    | 9506689  | exosome component 4                                                | Cytosolic | 1  | 0.75 | 0.61 | 2.09 | 0.74 | 0.59 | 2.11 |
| 2 | DIABLO    | 9845297  | diablo isoform 1 precursor                                         | Cytosolic | 1  | 0.70 | 0.54 | 2.09 | 0.69 | 0.53 | 2.09 |
| 2 | S100A4    | 9845516  | S100 calcium-binding protein A4                                    | Cytosolic | 1  | 0.75 | 0.62 | 1.25 | 0.70 | 0.54 | 1.31 |
| 2 | NMT1      | 10835073 | N-myristoyltransferase 1                                           | Cytosolic | 1  | 1.02 | 0.95 | 3.05 | 1.29 | 0.62 | 2.09 |
| 2 | CD2AP     | 11321634 | CD2-associated protein                                             | Cytosolic | 1  | 1.61 | 0.43 | 2.11 | 1.50 | 0.48 | 2.09 |
| 2 | DDA1      | 13129016 | hypothetical protein LOC79016                                      | Cytosolic | 1  | 0.60 | 0.42 | 2.09 | 0.83 | 0.73 | 2.09 |
| 2 | WDR61     | 13376840 | WD repeat domain 61                                                | Cytosolic | 1  | 0.84 | 0.75 | 2.11 | 1.25 | 0.66 | 2.09 |
| 2 | UBE2G1    | 13489085 | ubiquitin-conjugating enzyme E2G 1                                 | Cytosolic | 1  | 1.26 | 0.65 | 2.09 | 1.43 | 0.52 | 2.09 |
| 2 | HDHD2     | 14149777 | haloacid dehalogenase-like hydrolase domain containing 2           | Cytosolic | 1  | 0.82 | 0.71 | 2.11 | 0.84 | 0.74 | 2.09 |
| 2 | TUBB6     | 14210536 | tubulin, beta 6                                                    | Cytosolic | 19 | 1.03 | 0.88 | 1.47 | 1.03 | 0.90 | 1.58 |
| 2 | DPY30     | 14211889 | dpy-30-like protein                                                | Cytosolic | 1  | 1.06 | 0.84 | 2.11 | 1.05 | 0.76 | 4.06 |
| 2 | CIRH1A    | 14249536 | cirhin                                                             | Cytosolic | 1  | 0.77 | 0.63 | 2.09 | 0.90 | 0.85 | 2.09 |
| 2 | MRPS23    | 16554604 | mitochondrial ribosomal protein S23                                | Cytosolic | 1  | 0.86 | 0.78 | 2.09 | 0.90 | 0.85 | 2.09 |
| 2 | POLA2     | 20127448 | polymerase (DNA directed), alpha 2 (70kD subunit)                  | Cytosolic | 1  | 0.74 | 0.62 | 2.17 | 0.79 | 0.64 | 2.09 |
| 2 | WDR36     | 21281677 | WD repeat domain 36                                                | Cytosolic | 1  | 0.83 | 0.73 | 2.09 | 1.07 | 0.88 | 2.09 |
| 2 | XPO5      | 22748937 | exportin 5                                                         | Cytosolic | 1  | 1.11 | 0.75 | 1.43 | 1.18 | 0.66 | 1.29 |
| 2 | ARPC1A    | 22907052 | actin related protein 2/3 complex subunit 1A                       | Cytosolic | 1  | 0.95 | 0.93 | 2.09 | 1.08 | 0.87 | 2.09 |
| 2 | PSMB6     | 23110925 | proteasome beta 6 subunit                                          | Cytosolic | 2  | 1.29 | 0.62 | 2.09 | 1.34 | 0.58 | 2.09 |
| 2 | RPUSD2    | 23308689 | RNA pseudouridylylase synthase domain containing 2                 | Cytosolic | 1  | 1.18 | 0.63 | 2.09 | 1.13 | 0.75 | 2.09 |
| 2 | METAP1    | 24308009 | methionyl aminopeptidase 1                                         | Cytosolic | 1  | 1.12 | 0.81 | 2.09 | 1.12 | 0.81 | 2.09 |
| 2 | AHCYL2    | 24308043 | adenosylhomocysteinase 3                                           | Cytosolic | 1  | 1.03 | 0.99 | 1.38 | 0.82 | 0.60 | 1.38 |
| 2 | FAM84B    | 28557798 | breast cancer membrane protein 101                                 | Cytosolic | 1  | 1.63 | 0.42 | 2.09 | 1.63 | 0.42 | 2.09 |
| 2 | TUBB2B    | 29788768 | tubulin, beta 2B                                                   | Cytosolic | 42 | 1.25 | 0.60 | 2.09 | 1.19 | 0.65 | 2.09 |
| 2 | GORASP2   | 29826294 | golgi reassembly stacking protein 2                                | Cytosolic | 1  | 0.99 | 0.97 | 1.38 | 0.92 | 0.84 | 1.38 |
| 2 | ADD1      | 29826325 | adducin 1 (alpha) isoform d                                        | Cytosolic | 1  | 0.81 | 0.69 | 2.09 | 1.27 | 0.64 | 2.09 |
| 2 | BASP1     | 30795231 | brain abundant, membrane attached signal protein 1                 | Cytosolic | 1  | 2.11 | 0.30 | 2.09 | 2.49 | 0.26 | 2.11 |
| 2 | PAPOLA    | 32490557 | poly(A) polymerase alpha                                           | Cytosolic | 1  | 0.93 | 0.89 | 2.09 | 0.90 | 0.86 | 2.09 |
| 2 | UBE2O     | 33636750 | ubiquitin-conjugating enzyme E2O                                   | Cytosolic | 1  | 1.45 | 0.52 | 2.11 | 1.38 | 0.55 | 2.09 |
| 2 | NUP37     | 34222121 | nucleoporin 37kDa                                                  | Cytosolic | 1  | 1.31 | 0.61 | 2.09 | 1.36 | 0.56 | 2.09 |
| 2 | RNF25     | 34878787 | ring finger protein 25                                             | Cytosolic | 1  | 0.90 | 0.72 | 6.98 | 1.06 | 0.98 | 4.88 |
| 2 | SAMHD1    | 38016914 | SAM domain- and HD domain-containing protein 1                     | Cytosolic | 1  | 1.01 | 0.97 | 2.09 | 0.82 | 0.71 | 2.11 |
| 2 | ELAVL1    | 38201714 | ELAV-like 1                                                        | Cytosolic | 1  | 1.05 | 0.61 | 2.36 | 1.18 | 0.57 | 1.38 |
| 2 | DDX18     | 38327634 | DEAD (Asp-Glu-Ala-Asp) box polypeptide 18                          | Cytosolic | 1  | 0.80 | 0.79 | 1.51 | 0.63 | 0.64 | 1.37 |
| 2 | AGFG1     | 38570132 | HIV-1 Rev binding protein                                          | Cytosolic | 1  | 1.27 | 0.64 | 2.11 | 1.21 | 0.69 | 2.09 |
| 2 | UBAP2L    | 40254861 | ubiquitin associated protein 2-like                                | Cytosolic | 1  | 1.08 | 0.86 | 2.09 | 1.13 | 0.80 | 2.09 |
| 2 | COPE      | 40805827 | epsilon subunit of coatomer protein complex isoform c              | Cytosolic | 1  | 0.62 | 0.45 | 2.11 | 0.48 | 0.32 | 2.11 |
| 2 | RTN3      | 41393608 | reticulon 3 isoform b                                              | Cytosolic | 1  | 0.88 | 0.80 | 2.09 | 0.85 | 0.76 | 2.09 |
| 2 | GLRX5     | 42516576 | glutaredoxin 5                                                     | Cytosolic | 1  | 0.60 | 0.42 | 2.09 | 0.73 | 0.58 | 2.11 |
| 2 | RNH1      | 42822874 | ribonuclease/angiogenin inhibitor                                  | Cytosolic | 1  | 0.72 | 0.57 | 2.09 | 0.80 | 0.68 | 2.09 |
| 2 | BCAR1     | 44662836 | breast cancer anti-estrogen resistance 1                           | Cytosolic | 1  | 1.24 | 0.68 | 2.09 | 1.32 | 0.60 | 2.11 |
| 2 | PSPH      | 46249388 | phosphoserine phosphatase                                          | Cytosolic | 1  | 1.02 | 0.95 | 2.09 | 1.08 | 0.87 | 2.09 |
| 2 | TPM2      | 47519616 | tropomyosin 2 (beta) isoform 2                                     | Cytosolic | 7  | 0.91 | 0.87 | 2.09 | 0.95 | 0.92 | 2.09 |
| 2 | PRKI      | 48255885 | protein kinase C, iota                                             | Cytosolic | 1  | 1.32 | 0.57 | 1.38 | 1.10 | 0.84 | 1.38 |
| 2 | EIF3G     | 49472822 | eukaryotic translation initiation factor 3, subunit 4 delta, 44kDa | Cytosolic | 1  | 1.06 | 0.89 | 2.09 | 0.97 | 0.99 | 2.15 |
| 2 | EIF4B     | 50053795 | eukaryotic translation initiation factor 4B                        | Cytosolic | 1  | 0.80 | 0.68 | 2.09 | 0.84 | 0.75 | 2.09 |
| 2 | EIF2A     | 54873624 | eukaryotic translation initiation factor 2A                        | Cytosolic | 1  | 1.10 | 0.86 | 1.42 | 1.04 | 0.91 | 1.26 |
| 2 | SAPS1     | 55749689 | SAPS domain family, member 1                                       | Cytosolic | 1  | 0.18 | 0.25 | 2.70 | 0.27 | 0.29 | 2.58 |
| 2 | CCBL2     | 56713256 | kynurenine aminotransferase III isoform 2                          | Cytosolic | 1  | 0.71 | 0.55 | 2.11 | 0.64 | 0.46 | 2.11 |
| 2 | FXR1      | 61835172 | fragile X mental retardation-related protein 1 isoform c           | Cytosolic | 1  | 0.88 | 0.68 | 3.87 | 0.82 | 0.74 | 2.09 |
| 2 | ILK       | 62420875 | integrin-linked kinase                                             | Cytosolic | 1  | 1.34 | 0.58 | 2.09 | 0.89 | 0.82 | 2.09 |
| 2 | PAR6B     | 62955042 | PAR-6 beta                                                         | Cytosolic | 1  | 0.91 | 0.85 | 3.98 | 0.78 | 0.65 | 2.09 |
| 2 | BRCC3     | 64762484 | BRCA1/BRCA2-containing complex, subunit 3 isoform 2                | Cytosolic | 1  | 0.89 | 0.78 | 2.09 | 0.87 | 0.73 | 3.98 |
| 2 | CORO1B    | 65787364 | coronin, actin binding protein, 1B                                 | Cytosolic | 1  | 1.37 | 0.56 | 2.09 | 1.43 | 0.52 | 2.09 |
| 2 | C20orf27  | 85362737 | hypothetical protein LOC54976                                      | Cytosolic | 1  | 0.81 | 0.69 | 2.09 | 1.27 | 0.64 | 2.11 |
| 2 | LOC650283 | 88952891 | PREDICTED: similar to 40S ribosomal protein S15 (RIG protein)      | Cytosolic | 1  | 1.14 | 0.80 | 1.38 | 1.09 | 0.84 | 1.38 |
| 2 | UBXD7     | 88967349 | PREDICTED: similar to UBX domain-containing protein 7 isoform 1    | Cytosolic | 2  | 1.00 | 0.99 | 2.09 | 0.92 | 0.88 | 2.09 |

|       |           |           |                                                                               |               |    |      |      |      |      |      |       |
|-------|-----------|-----------|-------------------------------------------------------------------------------|---------------|----|------|------|------|------|------|-------|
| 2     | LOC643751 | 88979543  | PREDICTED: similar to cell division cycle 42 isoform 3                        | Cytosolic     | 1  | 1.20 | 0.71 | 1.25 | 1.17 | 0.74 | 1.25  |
| 2     | TCEB1P3   | 89031793  | PREDICTED: similar to transcription elongation factor B (SIII), polypeptide 1 | Cytosolic     | 1  | 0.97 | 0.89 | 2.09 | 0.90 | 0.78 | 2.09  |
| 2     | LOC652489 | 89062887  | PREDICTED: similar to SMT3 suppressor of mif two 3 homolog 2                  | Cytosolic     | 1  | 1.01 | 0.96 | 1.31 | 1.63 | 0.53 | 1.24  |
| 2     | APOA1BP   | 91984773  | apolipoprotein A-1 binding protein precursor                                  | Cytosolic     | 1  | 0.71 | 0.49 | 1.38 | 0.72 | 0.43 | 1.38  |
| 2     | PEG10     | 94421475  | paternally expressed 10 isoform RF1/2                                         | Cytosolic     | 1  | 0.95 | 0.92 | 2.09 | 0.94 | 0.91 | 2.09  |
| 2     | HAGH      | 94538322  | hydroxyacyl glutathione hydrolase isoform 1                                   | Cytosolic     | 1  | 0.73 | 0.58 | 2.09 | 0.90 | 0.85 | 2.09  |
| 2     | GLRX3     | 95113651  | thioredoxin-like                                                              | Cytosolic     | 1  | 1.17 | 0.74 | 2.09 | 1.13 | 0.79 | 2.09  |
| 2     | CCDC25    | 108936950 | coiled-coil domain containing 25                                              | Cytosolic     | 1  | 0.94 | 0.91 | 2.09 | 0.95 | 0.92 | 2.09  |
| 2     | SRP72     | 109638749 | signal recognition particle 72kDa                                             | Cytosolic     | 1  | 0.98 | 0.98 | 2.09 | 0.94 | 0.92 | 2.09  |
| 2     | C9orf64   | 110815802 | hypothetical protein LOC84267                                                 | Cytosolic     | 1  | 1.04 | 0.84 | 2.09 | 0.98 | 0.87 | 2.73  |
| 2     | RPL22L1   | 113415381 | PREDICTED: similar to ribosomal protein L22 like 1                            | Cytosolic     | 1  | 0.80 | 0.68 | 2.09 | 0.72 | 0.56 | 2.11  |
| 2     | MTA1      | 115527080 | metastasis associated protein                                                 | Cytosolic     | 1  | 0.77 | 0.65 | 1.58 | 0.69 | 0.53 | 1.38  |
| 2     | BPNT1     | 116812595 | 3'(2'), 5'-bisphosphate nucleotidase 1                                        | Cytosolic     | 1  | 1.12 | 0.84 | 2.09 | 1.06 | 1.00 | 4.79  |
| 2     | CTSA      | 119395729 | cathepsin A precursor                                                         | Cytosolic     | 1  | 1.04 | 0.93 | 2.09 | 0.85 | 0.75 | 2.09  |
| 1.97  | PLEKHA6   | 37595548  | phosphoinositol 3-phosphate-binding protein-3                                 | Cytosolic     | 1  | 0.92 | 0.88 | 2.09 | 0.88 | 0.81 | 2.09  |
| 1.91  | LOC732337 | 113415088 | PREDICTED: hypothetical protein                                               | Cytosolic     | 1  | 1.13 | 0.77 | 2.09 | 0.89 | 0.79 | 2.09  |
| 1.89  | GCA       | 6912388   | granulocin, EF-hand calcium binding protein                                   | Cytosolic     | 0  | 2.25 | 0.20 | 2.11 | 2.05 | 0.22 | 2.15  |
| 1.87  | SUPT5H    | 20149524  | suppressor of Ty 5 homolog                                                    | Cytosolic     | 1  | 1.14 | 0.78 | 2.09 | 1.15 | 0.77 | 2.09  |
| 1.83  | PDCC5     | 4759224   | programmed cell death 5                                                       | Cytosolic     | 1  | 0.95 | 0.94 | 2.09 | 0.84 | 0.74 | 2.09  |
| 1.8   | USP14     | 82880645  | ubiquitin specific protease 14 isoform b                                      | Cytosolic     | 0  | 1.22 | 0.33 | 1.32 | 1.12 | 0.50 | 1.26  |
| 1.78  | SF3B5     | 13775200  | SF3b10                                                                        | Cytosolic     | 1  | 0.78 | 0.65 | 2.09 | 0.80 | 0.68 | 2.09  |
| 1.74  | HNRNPUL2  | 118601081 | heterogeneous nuclear ribonucleoprotein U-like 2                              | Cytosolic     | 1  | 1.07 | 0.57 | 4.09 | 0.95 | 0.56 | 14.45 |
| 1.72  | MSH2      | 4557761   | mutS homolog 2                                                                | Cytosolic     | 1  | 1.71 | 0.40 | 2.09 | 1.54 | 0.46 | 2.09  |
| 1.72  | RBM8A     | 4826972   | RNA binding motif protein 8A                                                  | Cytosolic     | 1  | 0.59 | 0.41 | 2.11 | 0.56 | 0.39 | 2.11  |
| 1.72  | ZMYM3     | 4827067   | zinc finger protein 261                                                       | Cytosolic     | 1  | 0.65 | 0.48 | 2.09 | 0.90 | 0.93 | 7.52  |
| 1.71  | SRI       | 4507207   | sorcin isoform a                                                              | Cytosolic     | 1  | 0.91 | 0.87 | 2.09 | 1.06 | 0.90 | 2.09  |
| 1.71  | FOXp4     | 60498992  | forkhead box P4 isoform 3                                                     | Cytosolic     | 1  | 1.05 | 0.92 | 2.09 | 1.06 | 0.90 | 2.09  |
| 1.7   | RP523     | 4506701   | ribosomal protein S23                                                         | Cytosolic     | 1  | 1.06 | 0.90 | 2.09 | 1.13 | 0.80 | 2.09  |
| 1.7   | ARPC4     | 5031595   | actin related protein 2/3 complex subunit 4 isoform a                         | Cytosolic     | 1  | 1.03 | 0.94 | 2.09 | 1.20 | 0.71 | 2.09  |
| 1.7   | CBX1      | 5803076   | chromobox homolog 1 (HP1 beta homolog Drosophila )                            | Cytosolic     | 1  | 1.18 | 0.73 | 2.09 | 1.26 | 0.65 | 2.09  |
| 1.7   | LSM3      | 7657315   | Lsm3 protein                                                                  | Cytosolic     | 1  | 0.95 | 0.81 | 1.38 | 0.94 | 0.79 | 1.39  |
| 1.7   | CMPK1     | 7706497   | cytidylate kinase                                                             | Cytosolic     | 1  | 0.72 | 0.56 | 2.09 | 0.72 | 0.57 | 2.09  |
| 1.7   | PAP51     | 46094058  | 3'-phosphoadenosine 5'-phosphosulfate synthase 1                              | Cytosolic     | 1  | 1.32 | 0.60 | 2.09 | 1.28 | 0.63 | 2.09  |
| 1.7   | LOC730811 | 113413642 | PREDICTED: hypothetical protein                                               | Cytosolic     | 1  | 0.95 | 0.95 | 2.09 | 0.75 | 0.61 | 2.09  |
| 1.67  | EIF2B1    | 4503503   | eukaryotic translation initiation factor 2B, subunit 1 alpha, 26kDa           | Cytosolic     | 1  | 0.75 | 0.61 | 2.11 | 0.80 | 0.70 | 2.11  |
| 1.67  | SEC24D    | 7662659   | Sec24-related protein D                                                       | Cytosolic     | 0  | 1.37 | 0.56 | 2.09 | 1.41 | 0.54 | 2.09  |
| 1.67  | ASMTL     | 117553627 | acetylserotonin O-methyltransferase-like                                      | Cytosolic     | 1  | 0.90 | 0.75 | 2.09 | 0.84 | 0.60 | 2.09  |
| 1.65  | PPM1G     | 4505999   | protein phosphatase 1G                                                        | Cytosolic     | 1  | 0.92 | 0.88 | 2.09 | 0.96 | 0.96 | 2.09  |
| 1.64  | ARL2      | 4502229   | ADP-ribosylation factor-like 2                                                | Cytosolic     | 1  | 1.18 | 0.74 | 2.09 | 1.15 | 0.77 | 2.09  |
| 1.63  | ARL6IP1   | 24308007  | ADP-ribosylation factor-like 6 interacting protein                            | Cytosolic     | 1  | 0.93 | 0.91 | 2.09 | 0.88 | 0.81 | 2.11  |
| 1.58  | SEC24A    | 116174780 | SEC24 related gene family, member A                                           | Cytosolic     | 1  | 1.56 | 0.46 | 1.38 | 1.61 | 0.43 | 1.45  |
| 1.53  | RTN4      | 24431935  | reticulon 4 isoform A                                                         | Cytosolic     | 1  | 1.01 | 0.96 | 2.09 | 1.09 | 0.85 | 2.09  |
| 1.52  | NUDT21    | 5901926   | cleavage and polyadenylation specific factor 5                                | Cytosolic     | 1  | 0.80 | 0.68 | 1.38 | 0.74 | 0.60 | 1.38  |
| 1.52  | ADI1      | 8922762   | membrane-type 1 matrix metalloproteinase cytoplasmic tail binding protein-1   | Cytosolic     | 1  | 1.36 | 0.57 | 2.09 | 1.84 | 0.36 | 2.09  |
| 1.52  | PPP4R2    | 28372531  | protein phosphatase 4, regulatory subunit 2                                   | Cytosolic     | 1  | 0.96 | 0.86 | 2.56 | 1.11 | 0.55 | 2.09  |
| 1.47  | BZW1      | 113414197 | PREDICTED: similar to basic leucine zipper and W2 domains 1                   | Cytosolic     | 0  | 1.01 | 0.94 | 1.11 | 1.03 | 0.83 | 1.11  |
| 1.43  | FLT1      | 4503749   | fms-related tyrosine kinase 1                                                 | Cytosolic     | 1  | 0.91 | 0.90 | 2.09 | 0.95 | 0.85 | 2.09  |
| 1.4   | CBX5      | 6912292   | chromobox homolog 5 (HP1 alpha homolog, Drosophila)                           | Cytosolic     | 1  | 1.00 | 0.85 | 3.16 | 0.91 | 0.86 | 2.09  |
| 1.4   | GRP       | 31542860  | gastrin-releasing peptide isoform 1 preproprotein                             | Cytosolic     | 1  | 0.90 | 0.84 | 2.09 | 0.81 | 0.70 | 2.09  |
| 1.4   | RBM4      | 93277122  | RNA binding motif protein 4                                                   | Cytosolic     | 1  | 0.86 | 0.79 | 2.09 | 0.89 | 0.82 | 2.09  |
| 1.37  | CCDC6     | 46852390  | coiled-coil domain containing 6                                               | Cytosolic     | 1  | 1.53 | 0.47 | 2.09 | 1.34 | 0.58 | 2.09  |
| 1.37  | PRKCSH    | 48255891  | protein kinase C substrate 80K-H isoform 2                                    | Cytosolic     | 0  | 0.84 | 0.71 | 2.09 | 0.80 | 0.64 | 2.09  |
| 1.35  | ARCN1     | 11863154  | archain                                                                       | Cytosolic     | 0  | 0.87 | 0.80 | 2.11 | 0.87 | 0.79 | 2.09  |
| 1.34  | XRN2      | 18860916  | 5'-3' exoribonuclease 2                                                       | Cytosolic     | 0  | 0.97 | 0.96 | 2.09 | 1.10 | 0.83 | 2.13  |
| 1.31  | C18orf25  | 56549656  | ARKadia-like 1 isoform b                                                      | Cytosolic     | 1  | 0.65 | 0.48 | 2.09 | 1.24 | 0.67 | 2.09  |
| 52.8  | HSPD1     | 41399285  | chaperonin                                                                    | Non-cytosolic | 29 | 0.80 | 0.61 | 1.16 | 0.81 | 0.33 | 1.15  |
| 46.94 | ACTG1     | 4501887   | actin, gamma 1 propeptide                                                     | Non-cytosolic | 47 | 0.43 | 0.03 | 1.33 | 0.44 | 0.04 | 1.34  |
| 46.38 | PARP1     | 4501955   | poly (ADP-ribose) polymerase family, member 1                                 | Non-cytosolic | 25 | 0.30 | 0.00 | 1.77 | 0.26 | 0.00 | 1.96  |
| 46.31 | PRKDC     | 126032350 | protein kinase, DNA-activated, catalytic polypeptide isoform 2                | Non-cytosolic | 20 | 0.52 | 0.00 | 1.31 | 0.53 | 0.00 | 1.33  |
| 45.72 | SERPINH1  | 32454741  | serine (or cysteine) proteinase inhibitor, clade H, member 1                  | Non-cytosolic | 30 | 1.09 | 0.10 | 1.13 | 1.06 | 0.19 | 1.12  |
| 42.47 | HSPA5     | 16507237  | heat shock 70kDa protein 5                                                    | Non-cytosolic | 23 | 1.49 | 0.10 | 1.25 | 1.58 | 0.04 | 1.27  |



|       |           |           |                                                                        |               |    |      |      |      |      |      |      |
|-------|-----------|-----------|------------------------------------------------------------------------|---------------|----|------|------|------|------|------|------|
| 40.49 | EEF1A1    | 4503471   | eukaryotic translation elongation factor 1 alpha 1                     | Non-cytosolic | 21 | 1.53 | 0.06 | 1.24 | 1.64 | 0.04 | 1.26 |
| 35.11 | SPTBN1    | 112382250 | spectrin, beta, non-erythrocytic 1 isoform 1                           | Non-cytosolic | 18 | 0.74 | 0.05 | 1.31 | 0.72 | 0.03 | 1.28 |
| 33.46 | GANAB     | 38202257  | alpha glucosidase II alpha subunit isoform 2                           | Non-cytosolic | 17 | 0.55 | 0.02 | 1.34 | 0.47 | 0.00 | 1.41 |
| 32.43 | HSP90B1   | 4507677   | tumor rejection antigen (gp96) 1                                       | Non-cytosolic | 19 | 0.98 | 0.71 | 1.03 | 0.99 | 0.83 | 1.03 |
| 31.26 | CLTC      | 4758012   | clathrin heavy chain 1                                                 | Non-cytosolic | 15 | 1.01 | 0.64 | 1.04 | 1.01 | 0.54 | 1.04 |
| 30.99 | MYH10     | 41406064  | myosin, heavy polypeptide 10, non-muscle                               | Non-cytosolic | 16 | 2.31 | 0.00 | 1.25 | 2.31 | 0.00 | 1.25 |
| 30.68 | HNRNPA2B1 | 14043072  | heterogeneous nuclear ribonucleoprotein A2/B1 isoform B1               | Non-cytosolic | 18 | 0.95 | 0.72 | 1.06 | 0.94 | 0.22 | 1.06 |
| 29.94 | ATP5A1    | 50345984  | ATP synthase, H+ transporting, mitochondrial F1 complex, alpha subunit | Non-cytosolic | 15 | 1.00 | 0.54 | 1.04 | 0.99 | 0.72 | 1.04 |
| 29.65 | PDIA3     | 21361657  | protein disulfide isomerase-associated 3                               | Non-cytosolic | 17 | 1.98 | 0.00 | 1.37 | 1.64 | 0.04 | 1.32 |
| 29.06 | EEF2      | 4503483   | eukaryotic translation elongation factor 2                             | Non-cytosolic | 14 | 1.00 | 0.32 | 1.08 | 1.02 | 0.55 | 1.08 |
| 28.63 | SLC3A2    | 65506891  | solute carrier family 3 member 2 isoform c                             | Non-cytosolic | 16 | 3.28 | 0.00 | 1.51 | 3.80 | 0.00 | 1.54 |
| 28.47 | ATP5B     | 32189394  | ATP synthase, H+ transporting, mitochondrial F1 complex, beta subunit  | Non-cytosolic | 20 | 1.04 | 0.99 | 1.11 | 1.16 | 0.60 | 1.13 |
| 27.64 | SPTAN1    | 4507191   | spectrin, alpha, non-erythrocytic 1 (alpha-fodrin)                     | Non-cytosolic | 12 | 0.72 | 0.35 | 1.28 | 0.79 | 0.51 | 1.24 |
| 27.23 | DYNC1H1   | 33350932  | dynein, cytoplasmic, heavy polypeptide 1                               | Non-cytosolic | 13 | 1.38 | 0.76 | 1.33 | 1.08 | 0.74 | 1.24 |
| 24.99 | HIST2H4B  | 77539758  | histone cluster 2, H4b                                                 | Non-cytosolic | 23 | 0.43 | 0.00 | 1.19 | 0.41 | 0.00 | 1.20 |
| 24.2  | DHX9      | 100913206 | DEAH (Asp-Glu-Ala-His) box polypeptide 9                               | Non-cytosolic | 11 | 0.72 | 0.19 | 1.21 | 0.66 | 0.11 | 1.26 |
| 23.66 | RPL4      | 16579885  | ribosomal protein L4                                                   | Non-cytosolic | 13 | 0.98 | 0.28 | 1.06 | 0.99 | 0.25 | 1.06 |
| 23.62 | HSPA8     | 5729877   | heat shock 70kDa protein 8 isoform 1                                   | Non-cytosolic | 14 | 1.02 | 0.64 | 1.07 | 0.99 | 0.97 | 1.08 |
| 23.19 | P4HB      | 20070125  | prolyl 4-hydroxylase, beta subunit                                     | Non-cytosolic | 12 | 1.45 | 0.03 | 1.26 | 1.60 | 0.03 | 1.25 |
| 23.01 | KRT8      | 4504919   | keratin 8                                                              | Non-cytosolic | 12 | 0.74 | 0.14 | 1.20 | 0.75 | 0.22 | 1.20 |
| 21.96 | HIST1H2BL | 4504259   | H2B histone family, member C                                           | Non-cytosolic | 22 | 0.42 | 0.24 | 1.74 | 0.29 | 0.12 | 2.13 |
| 21.91 | TUBB      | 29788785  | tubulin, beta polypeptide                                              | Non-cytosolic | 12 | 0.97 | 0.83 | 1.10 | 1.03 | 0.58 | 1.09 |
| 21.83 | GAPDH     | 7669492   | glyceraldehyde-3-phosphate dehydrogenase                               | Non-cytosolic | 14 | 0.15 | 0.07 | 1.71 | 0.08 | 0.01 | 2.29 |
| 21.72 | EZR       | 21614499  | villin 2                                                               | Non-cytosolic | 9  | 3.63 | 0.00 | 1.56 | 3.87 | 0.00 | 1.57 |
| 21.68 | XRCC6     | 4503841   | ATP-dependent DNA helicase II, 70 kDa subunit                          | Non-cytosolic | 11 | 1.45 | 0.08 | 1.19 | 1.47 | 0.14 | 1.20 |
| 21.28 | LRPPRC    | 31621305  | leucine-rich PPR motif-containing protein                              | Non-cytosolic | 11 | 0.81 | 0.33 | 1.20 | 0.98 | 0.90 | 1.20 |
| 21.19 | ILF3      | 24234756  | interleukin enhancer binding factor 3 isoform c                        | Non-cytosolic | 13 | 0.69 | 0.19 | 1.25 | 0.64 | 0.11 | 1.28 |
| 21.16 | SNRNP200  | 40217847  | activating signal cointegrator 1 complex subunit 3-like 1              | Non-cytosolic | 10 | 0.72 | 0.09 | 1.26 | 0.77 | 0.11 | 1.19 |
| 20.77 | MATR3     | 62750354  | matrin 3                                                               | Non-cytosolic | 11 | 1.41 | 0.28 | 1.20 | 1.54 | 0.11 | 1.22 |
| 20.49 | FLNA      | 116063573 | filamin A, alpha                                                       | Non-cytosolic | 9  | 0.99 | 0.90 | 1.11 | 1.02 | 0.95 | 1.10 |
| 20.38 | AASS      | 13027640  | aminoadipate-semialdehyde synthase                                     | Non-cytosolic | 10 | 5.55 | 0.00 | 1.94 | 5.75 | 0.00 | 2.00 |
| 19.4  | HNRNPU    | 74136883  | heterogeneous nuclear ribonucleoprotein U isoform a                    | Non-cytosolic | 8  | 1.01 | 0.59 | 1.06 | 1.02 | 0.79 | 1.06 |
| 18.42 | ATP1A1    | 21361181  | Na+/K+ -ATPase alpha 1 subunit isoform a proprotein                    | Non-cytosolic | 10 | 0.98 | 0.83 | 1.06 | 0.95 | 0.56 | 1.06 |
| 18.27 | ALDOA     | 4557305   | aldolase A                                                             | Non-cytosolic | 10 | 0.49 | 0.01 | 1.47 | 0.61 | 0.01 | 1.34 |
| 18.22 | MDN1      | 24415404  | MDN1, midasin homolog                                                  | Non-cytosolic | 9  | 1.94 | 0.08 | 1.49 | 1.75 | 0.14 | 1.53 |
| 18.09 | KRT18     | 4557888   | keratin 18                                                             | Non-cytosolic | 8  | 0.68 | 0.18 | 1.29 | 0.52 | 0.08 | 1.34 |
| 17.84 | MYH9      | 12667788  | myosin, heavy polypeptide 9, non-muscle                                | Non-cytosolic | 16 | 0.27 | 0.01 | 1.64 | 0.25 | 0.01 | 1.74 |
| 17.51 | VIM       | 62414289  | vimentin                                                               | Non-cytosolic | 8  | 1.03 | 0.44 | 1.05 | 1.03 | 0.51 | 1.04 |
| 17.49 | RPL3      | 4506649   | ribosomal protein L3 isoform a                                         | Non-cytosolic | 9  | 1.32 | 0.19 | 1.33 | 1.14 | 0.38 | 1.29 |
| 17.45 | HNRNPM    | 14141152  | heterogeneous nuclear ribonucleoprotein M isoform a                    | Non-cytosolic | 8  | 2.05 | 0.17 | 1.63 | 1.75 | 0.30 | 1.51 |
| 17.23 | RPS3A     | 4506723   | ribosomal protein S3a                                                  | Non-cytosolic | 9  | 1.00 | 1.00 | 1.06 | 0.98 | 0.73 | 1.06 |
| 17.12 | XRCC5     | 10863945  | ATP-dependent DNA helicase II                                          | Non-cytosolic | 9  | 1.15 | 0.17 | 1.15 | 1.18 | 0.19 | 1.15 |
| 17    | TUBA1B    | 57013276  | tubulin, alpha, ubiquitous                                             | Non-cytosolic | 9  | 0.85 | 0.69 | 1.25 | 0.86 | 0.71 | 1.25 |
| 16.99 | TUFM      | 34147630  | Tu translation elongation factor, mitochondrial                        | Non-cytosolic | 8  | 1.17 | 0.59 | 1.14 | 1.13 | 0.64 | 1.15 |
| 16.5  | RPN1      | 4506675   | ribophorin I                                                           | Non-cytosolic | 9  | 0.59 | 0.23 | 1.26 | 0.62 | 0.19 | 1.22 |
| 16.49 | SLC25A5   | 4502099   | solute carrier family 25, member 5                                     | Non-cytosolic | 11 | 0.62 | 0.12 | 1.24 | 0.70 | 0.21 | 1.19 |
| 16.48 | DDX17     | 38201710  | DEAD box polypeptide 17 isoform p82                                    | Non-cytosolic | 8  | 0.52 | 0.12 | 1.50 | 0.58 | 0.15 | 1.43 |
| 16.22 | CANX      | 66933005  | calnexin                                                               | Non-cytosolic | 9  | 2.09 | 0.15 | 1.33 | 1.80 | 0.27 | 1.29 |
| 16.09 | HSP90AB1  | 20149594  | heat shock 90kDa protein 1, beta                                       | Non-cytosolic | 9  | 1.75 | 0.14 | 1.32 | 1.69 | 0.20 | 1.28 |
| 15.86 | PIIB      | 4758950   | peptidylprolyl isomerase B                                             | Non-cytosolic | 7  | 0.72 | 0.78 | 1.26 | 0.70 | 0.53 | 1.26 |
| 15.49 | HSPA9     | 24234688  | heat shock 70kDa protein 9B                                            | Non-cytosolic | 12 | 1.56 | 0.20 | 1.37 | 1.42 | 0.44 | 1.36 |
| 14.3  | FBL       | 12056465  | fibrillarin                                                            | Non-cytosolic | 7  | 0.57 | 0.23 | 1.20 | 0.53 | 0.18 | 1.24 |
| 14.26 | HNRNPC    | 117190254 | heterogeneous nuclear ribonucleoprotein C isoform b                    | Non-cytosolic | 7  | 1.00 | 0.80 | 1.06 | 1.01 | 0.92 | 1.06 |
| 14.12 | EIF4A3    | 7661920   | eukaryotic translation initiation factor 4A, isoform 3                 | Non-cytosolic | 7  | 0.95 | 0.80 | 1.11 | 0.95 | 0.78 | 1.11 |
| 13.79 | MDH2      | 21735621  | mitochondrial malate dehydrogenase                                     | Non-cytosolic | 8  | 0.53 | 0.10 | 1.27 | 0.54 | 0.08 | 1.26 |
| 13.44 | TOP2A     | 19913406  | DNA topoisomerase II, alpha isozyme                                    | Non-cytosolic | 7  | 1.04 | 0.91 | 1.34 | 1.06 | 0.80 | 1.25 |
| 13.23 | RPL10A    | 15431288  | ribosomal protein L10a                                                 | Non-cytosolic | 8  | 1.50 | 0.51 | 1.31 | 1.46 | 0.74 | 1.28 |
| 13.16 | HNRNPA3   | 34740329  | heterogeneous nuclear ribonucleoprotein A3                             | Non-cytosolic | 9  | 1.00 | 0.99 | 1.38 | 0.95 | 0.97 | 1.38 |
| 13    | IDH2      | 28178832  | isocitrate dehydrogenase 2 (NADP+), mitochondrial                      | Non-cytosolic | 6  | 0.29 | 0.00 | 1.66 | 0.26 | 0.00 | 1.67 |
| 12.88 | GLDC      | 108773801 | glycine dehydrogenase (decarboxylating)                                | Non-cytosolic | 6  | 2.38 | 0.04 | 1.33 | 2.42 | 0.02 | 1.34 |
| 12.7  | RPS4X     | 4506725   | ribosomal protein S4, X-linked X isoform                               | Non-cytosolic | 7  | 1.06 | 0.70 | 1.09 | 1.06 | 0.69 | 1.09 |

|       |           |           |                                                                             |               |    |       |      |      |       |      |      |
|-------|-----------|-----------|-----------------------------------------------------------------------------|---------------|----|-------|------|------|-------|------|------|
| 12.59 | SF3B1     | 54112117  | splicing factor 3b, subunit 1 isoform 1                                     | Non-cytosolic | 6  | 1.00  | 0.77 | 1.05 | 1.03  | 0.86 | 1.05 |
| 12.42 | PHB       | 4505773   | prohibitin                                                                  | Non-cytosolic | 6  | 0.80  | 0.63 | 1.46 | 0.64  | 0.73 | 1.50 |
| 12.37 | RPS2      | 15055539  | ribosomal protein S2                                                        | Non-cytosolic | 7  | 1.42  | 0.21 | 1.22 | 1.32  | 0.37 | 1.22 |
| 12.24 | HYOU1     | 5453832   | oxygen regulated protein                                                    | Non-cytosolic | 6  | 1.43  | 0.32 | 1.21 | 1.38  | 0.34 | 1.27 |
| 12.18 | PDI4      | 4758304   | protein disulfide isomerase-associated 4                                    | Non-cytosolic | 6  | 0.63  | 0.97 | 1.42 | 0.59  | 0.54 | 1.46 |
| 12.16 | SFPQ      | 4826998   | splicing factor proline/glutamine rich                                      | Non-cytosolic | 6  | 1.51  | 0.42 | 1.26 | 1.41  | 0.57 | 1.27 |
| 12.12 | TRIM28    | 5032179   | tripartite motif-containing 28 protein                                      | Non-cytosolic | 5  | 3.84  | 0.03 | 1.85 | 3.91  | 0.00 | 1.85 |
| 12.09 | HNRNPH1   | 5031753   | heterogeneous nuclear ribonucleoprotein H1                                  | Non-cytosolic | 8  | 0.69  | 0.83 | 1.20 | 0.64  | 0.67 | 1.19 |
| 11.91 | SLC2A1    | 5730051   | solute carrier family 2 (facilitated glucose transporter), member 1         | Non-cytosolic | 7  | 2.94  | 0.00 | 1.72 | 2.88  | 0.01 | 1.67 |
| 11.84 | CALR      | 4757900   | calreticulin                                                                | Non-cytosolic | 5  | 1.01  | 0.74 | 1.06 | 1.01  | 0.74 | 1.06 |
| 11.76 | HNRNPL    | 52632383  | heterogeneous nuclear ribonucleoprotein L isoform a                         | Non-cytosolic | 8  | 0.98  | 0.82 | 1.09 | 0.97  | 0.82 | 1.09 |
| 11.72 | L1TD1     | 31542663  | LINE-1 type transposase domain containing 1                                 | Non-cytosolic | 5  | 3.13  | 0.09 | 1.67 | 3.63  | 0.02 | 1.66 |
| 11.61 | EEF1G     | 4503481   | eukaryotic translation elongation factor 1 gamma                            | Non-cytosolic | 5  | 0.72  | 0.71 | 1.27 | 0.66  | 0.53 | 1.33 |
| 11.57 | CCT2      | 5453603   | chaperonin containing TCP1, subunit 2                                       | Non-cytosolic | 7  | 0.95  | 0.41 | 1.12 | 0.92  | 0.22 | 1.12 |
| 11.54 | HNRNPK    | 14165439  | heterogeneous nuclear ribonucleoprotein K isoform a                         | Non-cytosolic | 7  | 1.02  | 0.95 | 1.09 | 1.03  | 0.87 | 1.09 |
| 11.53 | RSL1D1    | 118498359 | ribosomal L1 domain containing 1                                            | Non-cytosolic | 6  | 0.70  | 0.11 | 1.32 | 0.62  | 0.07 | 1.27 |
| 11.48 | COPA      | 4758030   | coatamer protein complex, subunit alpha                                     | Non-cytosolic | 6  | 3.70  | 0.01 | 1.63 | 3.22  | 0.11 | 1.84 |
| 11.23 | LAMA1     | 38788416  | laminin, alpha 1                                                            | Non-cytosolic | 6  | 11.59 | 0.00 | 3.02 | 12.02 | 0.00 | 3.08 |
| 11.2  | LOC654188 | 113429184 | PREDICTED: similar to peptidylprolyl isomerase A isoform 1                  | Non-cytosolic | 5  | 0.28  | 0.00 | 1.57 | 0.18  | 0.00 | 2.15 |
| 11.17 | PABPC1    | 46367787  | poly(A) binding protein, cytoplasmic 1                                      | Non-cytosolic | 5  | 1.46  | 0.39 | 1.36 | 1.54  | 0.35 | 1.39 |
| 11.06 | PRPF8     | 91208426  | U5 snRNP-specific protein                                                   | Non-cytosolic | 4  | 1.00  | 0.85 | 1.11 | 1.02  | 0.54 | 1.12 |
| 11.05 | RPS16     | 4506691   | ribosomal protein S16                                                       | Non-cytosolic | 7  | 1.64  | 0.06 | 1.31 | 1.45  | 0.11 | 1.24 |
| 11.04 | PTPLAD1   | 117168248 | butyrate-induced transcript 1                                               | Non-cytosolic | 6  | 0.33  | 0.02 | 1.50 | 0.44  | 0.03 | 1.33 |
| 10.99 | SMARCA5   | 21071058  | SWI/SNF-related matrix-associated actin-dependent regulator of chromatin a5 | Non-cytosolic | 5  | 0.95  | 0.71 | 1.08 | 0.97  | 0.81 | 1.08 |
| 10.86 | ALDH18A1  | 62912457  | pyrroline-5-carboxylate synthetase isoform 2                                | Non-cytosolic | 7  | 1.08  | 0.44 | 1.11 | 1.04  | 0.80 | 1.09 |
| 10.83 | H2AFV     | 6912616   | H2A histone family, member V isoform 1                                      | Non-cytosolic | 4  | 0.49  | 0.56 | 2.13 | 0.38  | 0.51 | 1.64 |
| 10.8  | FDFT1     | 67089147  | farnesyl-diphosphate farnesyltransferase 1                                  | Non-cytosolic | 6  | 0.89  | 0.57 | 1.13 | 0.91  | 0.69 | 1.13 |
| 10.76 | TLN1      | 16753233  | talín 1                                                                     | Non-cytosolic | 5  | 1.02  | 0.83 | 1.09 | 0.99  | 0.95 | 1.09 |
| 10.69 | PHB2      | 6005854   | prohibitin 2                                                                | Non-cytosolic | 6  | 0.97  | 0.94 | 1.08 | 0.99  | 0.97 | 1.10 |
| 10.54 | HSP90AA1  | 40254816  | heat shock protein 90kDa alpha (cytosolic), class A member 1 isoform 2      | Non-cytosolic | 7  | 0.95  | 0.66 | 1.11 | 0.95  | 0.71 | 1.11 |
| 10.44 | HNRNPA1   | 4504445   | heterogeneous nuclear ribonucleoprotein A1 isoform a                        | Non-cytosolic | 15 | 1.09  | 0.45 | 1.10 | 1.09  | 0.49 | 1.10 |
| 10.43 | VDAC2     | 42476281  | voltage-dependent anion channel 2                                           | Non-cytosolic | 6  | 0.95  | 0.96 | 1.09 | 0.94  | 0.95 | 1.09 |
| 10.38 | HIST1H1D  | 4885377   | histone cluster 1, H1d                                                      | Non-cytosolic | 5  | 0.35  | 0.21 | 1.84 | 0.46  | 0.31 | 1.61 |
| 10.22 | PTBP1     | 4506243   | polypyrimidine tract-binding protein 1 isoform a                            | Non-cytosolic | 5  | 2.19  | 0.44 | 1.56 | 1.94  | 0.52 | 1.50 |
| 10.18 | RPL7A     | 4506661   | ribosomal protein L7a                                                       | Non-cytosolic | 6  | 1.05  | 0.65 | 1.10 | 1.03  | 0.94 | 1.10 |
| 10.08 | LOC143244 | 89031353  | PREDICTED: similar to eukaryotic translation initiation factor 5A           | Non-cytosolic | 6  | 0.95  | 0.76 | 1.06 | 0.94  | 0.98 | 1.06 |
| 10.05 | G3BP1     | 5031703   | Ras-GTPase-activating protein SH3-domain-binding protein                    | Non-cytosolic | 6  | 1.69  | 0.14 | 1.22 | 1.69  | 0.16 | 1.29 |
| 10    | HIST1H1B  | 4885381   | histone cluster 1, H1b                                                      | Non-cytosolic | 6  | 0.55  | 0.12 | 1.46 | 0.51  | 0.08 | 1.37 |
| 9.98  | TFRC      | 4507457   | transferrin receptor                                                        | Non-cytosolic | 4  | 0.50  | 0.33 | 1.80 | 0.36  | 0.11 | 2.05 |
| 9.97  | DNMT3B    | 5901940   | DNA cytosine-5 methyltransferase 3 beta isoform 1                           | Non-cytosolic | 4  | 5.65  | 0.01 | 1.80 | 5.45  | 0.01 | 1.84 |
| 9.94  | ACTN1     | 4501891   | actinin, alpha 1                                                            | Non-cytosolic | 5  | 0.80  | 0.58 | 4.06 | 0.77  | 0.52 | 2.09 |
| 9.72  | RBMX      | 56699409  | RNA binding motif protein, X-linked                                         | Non-cytosolic | 5  | 1.85  | 0.24 | 1.42 | 1.75  | 0.26 | 1.46 |
| 9.66  | NPM1      | 40353734  | nucleophosmin 1 isoform 2                                                   | Non-cytosolic | 9  | 1.80  | 0.23 | 1.33 | 1.69  | 0.33 | 1.33 |
| 9.63  | PDI4      | 5031973   | protein disulfide isomerase-associated 6                                    | Non-cytosolic | 5  | 1.06  | 0.59 | 1.09 | 1.07  | 0.62 | 1.10 |
| 9.56  | BAZ1B     | 14670392  | bromodomain adjacent to zinc finger domain, 1B                              | Non-cytosolic | 5  | 0.71  | 0.16 | 1.37 | 0.69  | 0.16 | 1.38 |
| 9.55  | DDX5      | 4758138   | DEAD (Asp-Glu-Ala-Asp) box polypeptide 5                                    | Non-cytosolic | 7  | 1.06  | 0.79 | 1.07 | 1.01  | 0.95 | 1.07 |
| 9.54  | PDS5B     | 7657269   | androgen-induced prostate proliferative shutoff associated protein          | Non-cytosolic | 4  | 0.76  | 0.59 | 1.91 | 0.74  | 0.62 | 1.51 |
| 9.52  | CKAP4     | 19920317  | cytoskeleton-associated protein 4                                           | Non-cytosolic | 4  | 0.89  | 0.59 | 1.12 | 0.87  | 0.51 | 1.10 |
| 9.46  | FASN      | 41872631  | fatty acid synthase                                                         | Non-cytosolic | 4  | 0.99  | 0.93 | 1.11 | 1.01  | 0.90 | 1.11 |
| 9.46  | RPL6      | 67189747  | ribosomal protein L6                                                        | Non-cytosolic | 8  | 1.25  | 0.69 | 1.46 | 1.21  | 0.69 | 1.49 |
| 9.36  | DDX21     | 50659095  | DEAD (Asp-Glu-Ala-Asp) box polypeptide 21                                   | Non-cytosolic | 5  | 1.01  | 0.93 | 1.19 | 1.10  | 0.67 | 1.17 |
| 9.32  | RPS8      | 4506743   | ribosomal protein S8                                                        | Non-cytosolic | 6  | 1.49  | 0.43 | 1.43 | 1.20  | 0.71 | 1.46 |
| 9.31  | LMNA      | 27436948  | lamin A/C isoform 3                                                         | Non-cytosolic | 5  | 0.68  | 0.33 | 1.29 | 0.63  | 0.21 | 1.20 |
| 9.31  | TMPO      | 73760405  | thymopoietin isoform beta                                                   | Non-cytosolic | 5  | 0.72  | 0.19 | 1.25 | 0.72  | 0.17 | 1.24 |
| 9.16  | HK1       | 4504391   | hexokinase 1 isoform HK1                                                    | Non-cytosolic | 5  | 1.63  | 0.23 | 1.39 | 2.09  | 0.07 | 1.41 |
| 9.15  | VDAC1     | 4507879   | voltage-dependent anion channel 1                                           | Non-cytosolic | 4  | 0.95  | 0.81 | 1.17 | 0.92  | 0.66 | 1.15 |
| 9.13  | MTCH2     | 7657347   | mitochondrial carrier homolog 2                                             | Non-cytosolic | 4  | 0.60  | 0.10 | 1.26 | 0.51  | 0.06 | 1.26 |
| 9.09  | UQCRC2    | 50592988  | ubiquinol-cytochrome c reductase core protein II                            | Non-cytosolic | 4  | 0.89  | 0.62 | 1.11 | 0.90  | 0.68 | 1.11 |
| 9.05  | GOT2      | 73486658  | aspartate aminotransferase 2                                                | Non-cytosolic | 4  | 1.38  | 0.18 | 1.19 | 1.27  | 0.63 | 1.29 |
| 9.03  | DDX3X     | 87196351  | DEAD/H (Asp-Glu-Ala-Asp/His) box polypeptide 3                              | Non-cytosolic | 5  | 1.67  | 0.25 | 1.57 | 1.67  | 0.23 | 1.53 |
| 9.01  | RPL7      | 15431301  | ribosomal protein L7                                                        | Non-cytosolic | 5  | 1.41  | 0.32 | 1.19 | 1.31  | 0.48 | 1.19 |

|      |           |           |                                                                                         |               |   |      |      |      |      |      |      |
|------|-----------|-----------|-----------------------------------------------------------------------------------------|---------------|---|------|------|------|------|------|------|
| 9    | DHCR24    | 13375618  | 24-dehydrocholesterol reductase                                                         | Non-cytosolic | 4 | 0.80 | 0.12 | 1.25 | 0.80 | 0.10 | 1.46 |
| 8.96 | CCT6A     | 4502643   | chaperonin containing TCP1, subunit 6A isoform a                                        | Non-cytosolic | 4 | 1.11 | 0.17 | 1.18 | 1.06 | 0.30 | 1.20 |
| 8.92 | JMMT      | 5803115   | inner membrane protein, mitochondrial                                                   | Non-cytosolic | 5 | 0.95 | 0.47 | 1.12 | 0.97 | 0.56 | 1.13 |
| 8.9  | PRDX1     | 4505591   | peroxiredoxin 1                                                                         | Non-cytosolic | 4 | 0.93 | 0.70 | 1.13 | 0.93 | 0.49 | 1.17 |
| 8.89 | NCLN      | 51873031  | nicalin                                                                                 | Non-cytosolic | 4 | 0.98 | 0.99 | 1.12 | 0.97 | 0.90 | 1.10 |
| 8.84 | RPL5      | 14591909  | ribosomal protein L5                                                                    | Non-cytosolic | 5 | 2.00 | 0.33 | 1.33 | 1.79 | 0.40 | 1.47 |
| 8.84 | LOC653232 | 88998868  | PREDICTED: similar to ribosomal protein L15 isoform 4                                   | Non-cytosolic | 5 | 1.37 | 0.44 | 1.19 | 1.38 | 0.47 | 1.18 |
| 8.78 | SHMT2     | 19923315  | serine hydroxymethyltransferase 2 (mitochondrial)                                       | Non-cytosolic | 4 | 0.95 | 0.84 | 1.18 | 0.95 | 0.92 | 1.21 |
| 8.68 | LMNB1     | 5031877   | lamin B1                                                                                | Non-cytosolic | 4 | 1.15 | 0.40 | 1.13 | 1.16 | 0.39 | 1.13 |
| 8.67 | CCT4      | 38455427  | chaperonin containing TCP1, subunit 4 (delta)                                           | Non-cytosolic | 4 | 0.79 | 0.55 | 1.20 | 0.77 | 0.56 | 1.16 |
| 8.66 | RPS9      | 14141193  | ribosomal protein S9                                                                    | Non-cytosolic | 3 | 1.06 | 0.58 | 1.09 | 1.05 | 0.61 | 1.09 |
| 8.65 | TMED10    | 98986464  | transmembrane emp24 domain-containing protein 10                                        | Non-cytosolic | 4 | 1.75 | 0.51 | 1.37 | 1.54 | 0.67 | 1.38 |
| 8.61 | GCN1L1    | 54607053  | GCN1 general control of amino-acid synthesis 1-like 1                                   | Non-cytosolic | 4 | 1.16 | 0.19 | 1.18 | 1.04 | 0.70 | 1.32 |
| 8.56 | BASP1     | 30795231  | brain abundant, membrane attached signal protein 1                                      | Non-cytosolic | 4 | 1.10 | 0.56 | 1.16 | 1.04 | 0.84 | 1.11 |
| 8.35 | LOC653604 | 88943485  | PREDICTED: similar to H3 histone, family 2 isoform 2                                    | Non-cytosolic | 6 | 0.66 | 0.38 | 2.11 | 0.66 | 0.38 | 2.11 |
| 8.27 | PYCR1     | 24797097  | pyrroline-5-carboxylate reductase 1 isoform 1                                           | Non-cytosolic | 3 | 1.28 | 0.62 | 2.09 | 1.14 | 0.77 | 2.09 |
| 8.24 | OAT       | 4557809   | ornithine aminotransferase                                                              | Non-cytosolic | 4 | 1.94 | 0.15 | 1.46 | 1.91 | 0.09 | 1.37 |
| 8.2  | ATP2A2    | 4502285   | ATPase, Ca++ transporting, cardiac muscle, slow twitch 2 isoform 2                      | Non-cytosolic | 4 | 0.52 | 0.50 | 1.58 | 0.53 | 0.48 | 1.53 |
| 8.18 | SF3B3     | 54112121  | splicing factor 3b, subunit 3                                                           | Non-cytosolic | 5 | 0.97 | 0.93 | 1.12 | 0.96 | 0.90 | 1.12 |
| 8.14 | PRPF19    | 7657381   | PRP19/PSO4 pre-mRNA processing factor 19 homolog                                        | Non-cytosolic | 4 | 0.81 | 0.41 | 1.15 | 0.83 | 0.36 | 1.25 |
| 8.14 | SACM1L    | 41281579  | suppressor of actin 1                                                                   | Non-cytosolic | 5 | 1.05 | 0.51 | 1.39 | 0.98 | 0.73 | 1.47 |
| 8.11 | LOC645441 | 88947792  | PREDICTED: similar to 60S ribosomal protein L17 (L23) isoform 1                         | Non-cytosolic | 4 | 1.37 | 0.91 | 1.24 | 1.28 | 0.96 | 1.22 |
| 8.08 | COPB1     | 7705369   | coatamer protein complex, subunit beta                                                  | Non-cytosolic | 4 | 2.75 | 0.09 | 1.57 | 2.73 | 0.08 | 1.61 |
| 8.08 | DBD1      | 13435359  | damage-specific DNA binding protein 1                                                   | Non-cytosolic | 4 | 0.79 | 0.61 | 1.31 | 0.73 | 0.48 | 1.39 |
| 8.05 | NOMO3     | 51944969  | nodal modulator 3                                                                       | Non-cytosolic | 4 | 0.95 | 0.72 | 1.14 | 0.93 | 0.44 | 1.14 |
| 8.04 | FSCN1     | 4507115   | fascin 1                                                                                | Non-cytosolic | 4 | 0.36 | 0.03 | 1.66 | 0.39 | 0.03 | 1.66 |
| 8.04 | RAB10     | 33695095  | ras-related GTP-binding protein RAB10                                                   | Non-cytosolic | 4 | 0.28 | 0.11 | 1.79 | 0.42 | 0.21 | 1.72 |
| 8.03 | ILF2      | 24234747  | interleukin enhancer binding factor 2                                                   | Non-cytosolic | 5 | 0.90 | 0.49 | 1.09 | 0.91 | 0.55 | 1.08 |
| 8.03 | LRRC47    | 24308207  | leucine rich repeat containing 47                                                       | Non-cytosolic | 4 | 1.74 | 0.21 | 1.29 | 1.74 | 0.20 | 1.32 |
| 8.01 | TRAP1     | 7706485   | TNF receptor-associated protein 1                                                       | Non-cytosolic | 4 | 1.01 | 0.90 | 1.79 | 1.10 | 0.52 | 1.49 |
| 8.01 | MGST1     | 9945306   | microsomal glutathione S-transferase 1                                                  | Non-cytosolic | 4 | 0.29 | 0.13 | 1.66 | 0.29 | 0.16 | 1.66 |
| 8    | LIN28     | 13375938  | lin-28 homolog                                                                          | Non-cytosolic | 4 | 0.53 | 0.42 | 1.58 | 0.69 | 0.53 | 1.29 |
| 8    | NME1-NME2 | 66392203  | NME1-NME2 protein                                                                       | Non-cytosolic | 4 | 1.03 | 0.38 | 1.36 | 1.09 | 0.45 | 1.41 |
| 8    | PSPC1     | 109240550 | paraspeckle protein 1                                                                   | Non-cytosolic | 4 | 0.90 | 0.21 | 1.27 | 0.91 | 0.31 | 1.20 |
| 7.97 | IGF2BP1   | 56237027  | insulin-like growth factor 2 mRNA binding protein 1                                     | Non-cytosolic | 4 | 0.68 | 0.45 | 1.37 | 0.70 | 0.46 | 1.31 |
| 7.96 | RPL18A    | 11415026  | ribosomal protein L18a                                                                  | Non-cytosolic | 2 | 0.99 | 0.78 | 1.08 | 1.01 | 0.97 | 1.10 |
| 7.87 | DHX15     | 68509926  | DEAH (Asp-Glu-Ala-His) box polypeptide 15                                               | Non-cytosolic | 4 | 0.80 | 0.66 | 1.19 | 0.92 | 0.92 | 1.17 |
| 7.83 | CHD4      | 51599156  | chromodomain helicase DNA binding protein 4                                             | Non-cytosolic | 4 | 0.90 | 0.36 | 1.22 | 0.87 | 0.17 | 1.25 |
| 7.8  | LRRC59    | 40254924  | leucine rich repeat containing 59                                                       | Non-cytosolic | 5 | 1.00 | 1.00 | 1.09 | 1.05 | 0.74 | 1.08 |
| 7.77 | GNAI2     | 4504041   | guanine nucleotide binding protein (G protein), alpha inhibiting activity polypeptide 2 | Non-cytosolic | 4 | 0.95 | 0.46 | 1.15 | 0.95 | 0.66 | 1.15 |
| 7.77 | RPS19     | 4506695   | ribosomal protein S19                                                                   | Non-cytosolic | 3 | 1.08 | 0.29 | 1.12 | 1.02 | 0.50 | 1.12 |
| 7.77 | MAP1B     | 5174525   | microtubule-associated protein 1B isoform 1                                             | Non-cytosolic | 5 | 0.92 | 0.51 | 1.08 | 0.96 | 0.77 | 1.11 |
| 7.76 | BAT1      | 4758112   | HLA-B associated transcript 1                                                           | Non-cytosolic | 4 | 0.99 | 0.96 | 1.14 | 1.02 | 0.88 | 1.14 |
| 7.73 | PODXL     | 66277202  | podocalyxin-like isoform 1                                                              | Non-cytosolic | 3 | 0.34 | 0.20 | 1.56 | 0.30 | 0.24 | 1.69 |
| 7.71 | RPS10     | 4506679   | ribosomal protein S10                                                                   | Non-cytosolic | 6 | 1.16 | 0.82 | 1.22 | 1.25 | 0.68 | 1.18 |
| 7.71 | RPS13     | 4506685   | ribosomal protein S13                                                                   | Non-cytosolic | 5 | 1.47 | 0.64 | 1.21 | 1.51 | 0.59 | 1.24 |
| 7.7  | TXNDC5    | 42794771  | thioredoxin domain containing 5 isoform 1                                               | Non-cytosolic | 5 | 1.02 | 0.97 | 1.11 | 1.06 | 0.93 | 1.11 |
| 7.7  | LOC649821 | 89036208  | PREDICTED: similar to 60S ribosomal protein L14 (CAG-ISL 7) isoform 2                   | Non-cytosolic | 4 | 0.97 | 0.76 | 1.14 | 0.94 | 0.89 | 1.14 |
| 7.69 | ADAR      | 70166852  | adenosine deaminase, RNA-specific isoform a                                             | Non-cytosolic | 3 | 0.65 | 0.46 | 1.33 | 0.65 | 0.39 | 1.27 |
| 7.6  | RPS11     | 4506681   | ribosomal protein S11                                                                   | Non-cytosolic | 3 | 1.07 | 0.53 | 1.08 | 1.06 | 0.48 | 1.08 |
| 7.6  | CTNND1    | 10835010  | catenin (cadherin-associated protein), delta 1                                          | Non-cytosolic | 3 | 1.61 | 0.30 | 1.16 | 1.56 | 0.30 | 1.15 |
| 7.56 | CYC1      | 21359867  | cytochrome c-1                                                                          | Non-cytosolic | 3 | 1.10 | 0.54 | 1.14 | 1.16 | 0.38 | 1.14 |
| 7.54 | AGPS      | 4501993   | alkyldihydroxyacetone phosphate synthase                                                | Non-cytosolic | 4 | 0.95 | 0.97 | 1.27 | 0.85 | 0.50 | 1.22 |
| 7.54 | GPC4      | 21614525  | glypican 4                                                                              | Non-cytosolic | 4 | 0.99 | 1.00 | 1.38 | 0.96 | 0.92 | 1.79 |
| 7.51 | TCP1      | 57863257  | T-complex protein 1 isoform a                                                           | Non-cytosolic | 4 | 0.95 | 0.91 | 2.09 | 1.00 | 0.99 | 2.09 |
| 7.5  | EEF1D     | 25453474  | eukaryotic translation elongation factor 1 delta isoform 1                              | Non-cytosolic | 4 | 1.75 | 0.38 | 1.27 | 1.67 | 0.38 | 1.31 |
| 7.46 | YBX1      | 34098946  | nuclease sensitive element binding protein 1                                            | Non-cytosolic | 3 | 0.99 | 0.92 | 1.25 | 1.04 | 0.91 | 1.34 |
| 7.45 | HNRNPR    | 5031755   | heterogeneous nuclear ribonucleoprotein R                                               | Non-cytosolic | 3 | 0.97 | 0.86 | 1.16 | 0.95 | 0.77 | 1.14 |
| 7.42 | EFTUD2    | 41152056  | U5 snRNP-specific protein, 116 kD                                                       | Non-cytosolic | 3 | 1.05 | 0.55 | 1.12 | 1.03 | 0.56 | 1.13 |
| 7.37 | RAN       | 5453555   | ras-related nuclear protein                                                             | Non-cytosolic | 3 | 0.51 | 0.31 | 1.69 | 0.55 | 0.36 | 1.67 |
| 7.28 | FADS2     | 4758334   | fatty acid desaturase 2                                                                 | Non-cytosolic | 3 | 0.90 | 0.40 | 1.25 | 0.88 | 0.34 | 1.25 |

|      |           |           |                                                                             |               |    |      |      |      |       |      |      |
|------|-----------|-----------|-----------------------------------------------------------------------------|---------------|----|------|------|------|-------|------|------|
| 7.28 | VCP       | 6005942   | valosin-containing protein                                                  | Non-cytosolic | 4  | 1.00 | 0.93 | 1.31 | 1.05  | 0.51 | 1.47 |
| 7.23 | RPS15A    | 71772415  | ribosomal protein S15a                                                      | Non-cytosolic | 3  | 1.87 | 0.18 | 1.38 | 1.98  | 0.21 | 1.36 |
| 7.19 | ANXA2     | 50845388  | annexin A2 isoform 1                                                        | Non-cytosolic | 3  | 0.95 | 0.67 | 1.16 | 0.92  | 0.43 | 1.14 |
| 7.11 | HSD17B4   | 4504505   | hydroxysteroid (17-beta) dehydrogenase 4                                    | Non-cytosolic | 4  | 0.95 | 0.52 | 1.10 | 0.95  | 0.57 | 1.10 |
| 7.07 | MARCKS    | 11125772  | myristoylated alanine-rich protein kinase C substrate                       | Non-cytosolic | 4  | 0.53 | 0.39 | 1.51 | 0.37  | 0.33 | 1.51 |
| 7.07 | FUBP3     | 113421227 | PREDICTED: similar to Far upstream element-binding protein 3                | Non-cytosolic | 3  | 0.90 | 0.66 | 1.17 | 0.87  | 0.47 | 1.14 |
| 7    | NCL       | 55956788  | nucleolin                                                                   | Non-cytosolic | 3  | 1.09 | 0.69 | 1.25 | 1.05  | 0.82 | 1.25 |
| 6.99 | PMPCB     | 94538354  | mitochondrial processing peptidase beta subunit                             | Non-cytosolic | 4  | 0.98 | 0.94 | 1.18 | 1.00  | 0.97 | 1.14 |
| 6.98 | GLUD1     | 4885281   | glutamate dehydrogenase 1                                                   | Non-cytosolic | 3  | 0.95 | 0.68 | 1.10 | 0.95  | 0.56 | 1.10 |
| 6.96 | FXR1      | 61835172  | fragile X mental retardation-related protein 1 isoform c                    | Non-cytosolic | 3  | 0.90 | 0.44 | 1.15 | 0.93  | 0.64 | 1.18 |
| 6.94 | CS        | 38327625  | citrate synthase , isoform a                                                | Non-cytosolic | 3  | 1.02 | 0.16 | 1.15 | 0.96  | 0.44 | 1.15 |
| 6.92 | ATP5F1    | 21361565  | ATP synthase, H+ transporting, mitochondrial F0 complex, subunit B1         | Non-cytosolic | 3  | 1.00 | 0.94 | 1.34 | 0.95  | 0.95 | 1.29 |
| 6.92 | LOC728658 | 89033540  | PREDICTED: similar to ribosomal protein L13a isoform 1                      | Non-cytosolic | 3  | 0.97 | 0.94 | 1.21 | 0.95  | 0.87 | 1.18 |
| 6.92 | RRBP1     | 110611220 | ribosome binding protein 1                                                  | Non-cytosolic | 3  | 1.49 | 0.22 | 1.45 | 1.28  | 0.52 | 2.13 |
| 6.92 | PA2G4     | 124494254 | ErbB3-binding protein 1                                                     | Non-cytosolic | 3  | 0.97 | 0.98 | 1.06 | 0.97  | 0.99 | 1.06 |
| 6.81 | CTNNB1    | 4503131   | catenin (cadherin-associated protein), beta 1, 88kDa                        | Non-cytosolic | 3  | 2.61 | 0.11 | 1.58 | 2.68  | 0.11 | 1.58 |
| 6.8  | EIF4G1    | 38201627  | eukaryotic translation initiation factor 4 gamma, 1 isoform 2               | Non-cytosolic | 3  | 1.07 | 0.67 | 1.27 | 1.04  | 0.91 | 1.26 |
| 6.79 | LOC731605 | 113430765 | PREDICTED: similar to Bcl-2-associated transcription factor 1 (Btf)         | Non-cytosolic | 3  | 1.13 | 0.41 | 1.18 | 1.05  | 0.67 | 1.18 |
| 6.74 | RPLP2     | 4506671   | ribosomal protein P2                                                        | Non-cytosolic | 3  | 1.01 | 0.61 | 1.08 | 1.05  | 0.48 | 1.08 |
| 6.72 | AHNAK     | 61743954  | AHNAK nucleoprotein isoform 1                                               | Non-cytosolic | 3  | 0.35 | 0.06 | 1.47 | 0.48  | 0.11 | 1.46 |
| 6.68 | CYCS      | 11128019  | cytochrome c                                                                | Non-cytosolic | 3  | 0.68 | 0.31 | 1.27 | 0.63  | 0.25 | 1.28 |
| 6.66 | BSG       | 38372925  | basigin isoform 2                                                           | Non-cytosolic | 3  | 0.98 | 0.54 | 1.15 | 0.97  | 0.69 | 1.12 |
| 6.59 | CTNNA1    | 55770844  | catenin, alpha 1                                                            | Non-cytosolic | 3  | 1.82 | 0.19 | 1.51 | 2.17  | 0.12 | 1.28 |
| 6.55 | PPP2R1A   | 21361399  | alpha isoform of regulatory subunit A, protein phosphatase 2                | Non-cytosolic | 2  | 0.95 | 0.72 | 1.21 | 1.03  | 0.72 | 1.22 |
| 6.5  | SF3B2     | 55749531  | splicing factor 3B subunit 2                                                | Non-cytosolic | 3  | 1.03 | 0.92 | 1.11 | 1.02  | 0.97 | 1.11 |
| 6.48 | RPL27     | 4506623   | ribosomal protein L27                                                       | Non-cytosolic | 4  | 1.03 | 0.46 | 1.11 | 1.01  | 0.76 | 1.11 |
| 6.4  | TJP1      | 116875767 | tight junction protein 1 isoform a                                          | Non-cytosolic | 3  | 1.77 | 0.27 | 1.49 | 1.64  | 0.28 | 1.27 |
| 6.39 | NDUFB1    | 4826852   | NADH dehydrogenase (ubiquinone) 1, alpha/beta subcomplex, 1, 8kDa           | Non-cytosolic | 5  | 0.41 | 0.20 | 1.64 | 0.44  | 0.18 | 1.58 |
| 6.39 | CAND1     | 21361794  | TIP120 protein                                                              | Non-cytosolic | 3  | 0.61 | 0.66 | 1.42 | 0.74  | 0.93 | 1.47 |
| 6.38 | TMEM43    | 13236587  | transmembrane protein 43                                                    | Non-cytosolic | 3  | 0.33 | 0.11 | 1.64 | 0.44  | 0.17 | 1.38 |
| 6.38 | DARS      | 45439306  | aspartyl-tRNA synthetase                                                    | Non-cytosolic | 3  | 1.28 | 0.62 | 1.45 | 1.36  | 0.46 | 1.43 |
| 6.35 | CCT5      | 24307939  | chaperonin containing TCP1, subunit 5 (epsilon)                             | Non-cytosolic | 4  | 0.86 | 0.75 | 1.12 | 0.90  | 0.97 | 1.13 |
| 6.31 | NCAPD2    | 41281521  | chromosome condensation-related SMC-associated protein 1                    | Non-cytosolic | 3  | 0.80 | 0.49 | 1.25 | 0.74  | 0.30 | 1.25 |
| 6.29 | CALD1     | 15149465  | caldesmon 1 isoform 5                                                       | Non-cytosolic | 3  | 1.36 | 0.46 | 1.37 | 1.57  | 0.30 | 1.24 |
| 6.28 | CAD       | 18105007  | carbamoylphosphate synthetase 2/aspartate transcarbamylase/dihydroorotase   | Non-cytosolic | 3  | 1.07 | 0.04 | 1.12 | 1.02  | 0.54 | 1.15 |
| 6.27 | NUP155    | 4758844   | nucleoporin 155kDa isoform 2                                                | Non-cytosolic | 3  | 0.97 | 0.87 | 1.24 | 0.92  | 0.87 | 1.25 |
| 6.24 | SMARCC1   | 21237802  | SWI/SNF-related matrix-associated actin-dependent regulator of chromatin c1 | Non-cytosolic | 3  | 0.95 | 0.72 | 1.16 | 0.90  | 0.42 | 1.16 |
| 6.23 | PNN       | 33356174  | pinin, desmosome associated protein                                         | Non-cytosolic | 3  | 1.21 | 0.70 | 1.25 | 1.09  | 0.85 | 1.25 |
| 6.22 | SND1      | 77404397  | staphylococcal nuclease domain containing 1                                 | Non-cytosolic | 3  | 1.10 | 0.58 | 1.13 | 1.07  | 0.74 | 1.14 |
| 6.17 | CCT7      | 5453607   | chaperonin containing TCP1, subunit 7 isoform a                             | Non-cytosolic | 3  | 1.03 | 0.91 | 1.18 | 1.03  | 0.91 | 1.18 |
| 6.17 | HIST2H2AC | 24638446  | H2A histone family, member Q                                                | Non-cytosolic | 3  | 0.42 | 0.38 | 1.19 | 0.44  | 0.40 | 1.18 |
| 6.17 | NONO      | 34932414  | non-POU domain containing, octamer-binding                                  | Non-cytosolic | 3  | 0.88 | 0.54 | 1.26 | 0.87  | 0.40 | 1.19 |
| 6.16 | RPL23A    | 17105394  | ribosomal protein L23a                                                      | Non-cytosolic | 3  | 1.13 | 0.51 | 1.15 | 1.06  | 0.82 | 1.15 |
| 6.15 | SIN3A     | 23397666  | transcriptional co-repressor Sin3A                                          | Non-cytosolic | 3  | 0.97 | 0.73 | 1.26 | 0.94  | 0.76 | 1.27 |
| 6.14 | PKM2      | 33286422  | pyruvate kinase 3 isoform 2                                                 | Non-cytosolic | 3  | 0.96 | 0.80 | 1.11 | 0.98  | 0.86 | 1.10 |
| 6.13 | KTN1      | 33620775  | kinectin 1 isoform a                                                        | Non-cytosolic | 3  | 1.00 | 0.86 | 1.21 | 0.97  | 0.79 | 1.17 |
| 6.12 | NOP56     | 32483374  | nucleolar protein 5A                                                        | Non-cytosolic | 3  | 0.95 | 0.87 | 1.18 | 0.95  | 0.97 | 1.19 |
| 6.12 | HEATR1    | 73695475  | protein BAP28                                                               | Non-cytosolic | 3  | 0.90 | 0.50 | 1.25 | 0.91  | 0.51 | 1.20 |
| 6.1  | LOC644820 | 89060593  | PREDICTED: similar to eukaryotic translation elongation factor 1 beta 2     | Non-cytosolic | 3  | 1.72 | 0.36 | 1.37 | 1.79  | 0.33 | 1.36 |
| 6.1  | CHERP     | 119226260 | calcium homeostasis endoplasmic reticulum protein                           | Non-cytosolic | 3  | 1.01 | 0.97 | 1.25 | 1.04  | 0.81 | 1.25 |
| 6.09 | RPS18     | 11968182  | ribosomal protein S18                                                       | Non-cytosolic | 3  | 1.25 | 0.32 | 1.18 | 1.26  | 0.28 | 1.18 |
| 6.08 | ACTC1     | 4885049   | cardiac muscle alpha actin 1 proprotein                                     | Non-cytosolic | 18 | 9.20 | 0.19 | 2.75 | 12.47 | 0.06 | 3.25 |
| 6.08 | DBN1      | 18426915  | drebrin 1 isoform a                                                         | Non-cytosolic | 3  | 0.98 | 0.88 | 1.24 | 0.96  | 0.63 | 1.21 |
| 6.08 | AP2A2     | 27477041  | adaptor-related protein complex 2, alpha 2 subunit                          | Non-cytosolic | 3  | 1.01 | 0.95 | 2.11 | 0.98  | 0.93 | 1.38 |
| 6.07 | APEX1     | 18375505  | APEX nuclease                                                               | Non-cytosolic | 3  | 1.07 | 0.61 | 1.12 | 1.03  | 0.84 | 1.12 |
| 6.06 | RPS3      | 15718687  | ribosomal protein S3                                                        | Non-cytosolic | 3  | 2.05 | 0.14 | 1.38 | 1.94  | 0.19 | 1.37 |
| 6.05 | PRDX4     | 5453549   | thioredoxin peroxidase                                                      | Non-cytosolic | 4  | 0.21 | 0.07 | 1.67 | 0.22  | 0.09 | 1.64 |
| 6.05 | TCERG1    | 91208418  | transcription elongation regulator 1 isoform 2                              | Non-cytosolic | 3  | 0.81 | 0.39 | 1.15 | 0.85  | 0.53 | 1.15 |
| 6.04 | LAMB1     | 4504951   | laminin, beta 1                                                             | Non-cytosolic | 3  | 2.70 | 0.16 | 1.39 | 2.51  | 0.17 | 1.38 |
| 6.04 | KHDRBS1   | 5730027   | KH domain containing, RNA binding, signal transduction associated 1         | Non-cytosolic | 5  | 1.36 | 0.81 | 1.22 | 1.36  | 0.90 | 1.25 |
| 6.03 | TEX10     | 8923269   | testis expressed sequence 10                                                | Non-cytosolic | 3  | 1.12 | 0.16 | 1.54 | 1.11  | 0.23 | 1.25 |

|      |           |           |                                                                                          |               |   |      |      |      |      |      |      |
|------|-----------|-----------|------------------------------------------------------------------------------------------|---------------|---|------|------|------|------|------|------|
| 6.03 | PSMD11    | 28872725  | proteasome 26S non-ATPase subunit 11                                                     | Non-cytosolic | 3 | 1.02 | 0.98 | 1.26 | 1.07 | 0.65 | 1.25 |
| 6.02 | CALU      | 4502551   | calumenin                                                                                | Non-cytosolic | 3 | 0.21 | 0.08 | 1.87 | 0.16 | 0.07 | 2.09 |
| 6.02 | PSMD2     | 25777602  | proteasome 26S non-ATPase subunit 2                                                      | Non-cytosolic | 3 | 0.89 | 0.44 | 4.33 | 1.72 | 0.60 | 2.17 |
| 6.01 | EPB41L2   | 4503579   | erythrocyte membrane protein band 4.1-like 2                                             | Non-cytosolic | 3 | 0.91 | 0.75 | 2.09 | 0.94 | 0.84 | 2.27 |
| 6    | FKBP3     | 4503727   | FK506-binding protein 3                                                                  | Non-cytosolic | 3 | 1.87 | 0.19 | 1.26 | 1.77 | 0.22 | 1.25 |
| 6    | EIF3M     | 23397429  | B5 receptor                                                                              | Non-cytosolic | 4 | 2.13 | 0.36 | 1.45 | 1.80 | 0.42 | 1.46 |
| 6    | SLC39A14  | 47271356  | solute carrier family 39 (zinc transporter), member 14                                   | Non-cytosolic | 4 | 0.99 | 0.99 | 2.09 | 0.98 | 1.00 | 2.09 |
| 6    | RBM25     | 55741709  | RNA binding motif protein 25                                                             | Non-cytosolic | 3 | 0.82 | 0.45 | 1.19 | 0.91 | 0.79 | 1.26 |
| 6    | RPS14     | 68160922  | ribosomal protein S14                                                                    | Non-cytosolic | 3 | 1.18 | 0.58 | 1.20 | 1.15 | 0.64 | 1.19 |
| 6    | LOC644166 | 88980535  | PREDICTED: similar to 40S ribosomal protein S26                                          | Non-cytosolic | 4 | 1.07 | 0.59 | 1.15 | 1.04 | 0.66 | 1.16 |
| 6    | LOC645619 | 89035461  | PREDICTED: similar to Adenylate kinase isoenzyme 4, mitochondrial                        | Non-cytosolic | 3 | 1.77 | 0.42 | 2.73 | 2.09 | 0.42 | 1.61 |
| 5.9  | PLEC1     | 41322916  | plectin 1 isoform 6                                                                      | Non-cytosolic | 2 | 1.33 | 0.17 | 1.25 | 1.32 | 0.18 | 1.25 |
| 5.89 | RPLP0     | 4506667   | ribosomal protein P0                                                                     | Non-cytosolic | 3 | 1.01 | 0.86 | 1.14 | 1.00 | 0.74 | 1.14 |
| 5.86 | LOC441246 | 89026059  | PREDICTED: similar to 60S ribosomal protein L35 isoform 5                                | Non-cytosolic | 3 | 1.12 | 0.60 | 1.16 | 1.09 | 0.73 | 1.16 |
| 5.85 | TECR      | 24475816  | glycoprotein, synaptic 2                                                                 | Non-cytosolic | 3 | 0.32 | 0.12 | 1.58 | 0.19 | 0.11 | 2.33 |
| 5.78 | NDUFS2    | 4758786   | NADH dehydrogenase (ubiquinone) Fe-S protein 2, 49kDa                                    | Non-cytosolic | 2 | 0.46 | 0.70 | 1.42 | 0.49 | 0.63 | 1.39 |
| 5.75 | DLD       | 91199540  | dihydrolipoamide dehydrogenase                                                           | Non-cytosolic | 3 | 0.90 | 0.93 | 1.24 | 0.89 | 0.79 | 1.19 |
| 5.74 | ERP44     | 52487191  | thioredoxin domain containing 4 (endoplasmic reticulum)                                  | Non-cytosolic | 2 | 0.87 | 0.63 | 1.38 | 0.78 | 0.39 | 1.38 |
| 5.73 | RPL13     | 15431297  | ribosomal protein L13                                                                    | Non-cytosolic | 3 | 0.91 | 0.99 | 1.38 | 0.95 | 0.90 | 1.38 |
| 5.73 | AP2B1     | 71773106  | adaptor-related protein complex 2, beta 1 subunit isoform a                              | Non-cytosolic | 3 | 1.05 | 0.58 | 1.32 | 1.01 | 0.77 | 1.25 |
| 5.7  | ATP5O     | 4502303   | mitochondrial ATP synthase, O subunit                                                    | Non-cytosolic | 3 | 0.52 | 0.25 | 2.00 | 0.34 | 0.29 | 2.65 |
| 5.7  | PGRCM1    | 5729875   | progesterone receptor membrane component 1                                               | Non-cytosolic | 3 | 0.89 | 0.50 | 3.44 | 0.90 | 0.55 | 3.34 |
| 5.7  | PRDX3     | 5802974   | peroxiredoxin 3 isoform a                                                                | Non-cytosolic | 4 | 1.00 | 0.76 | 1.21 | 1.00 | 0.85 | 1.17 |
| 5.7  | SFRS13A   | 16905517  | FUS interacting protein (serine-arginine rich) 1 isoform 2                               | Non-cytosolic | 3 | 0.96 | 0.66 | 1.16 | 1.02 | 0.91 | 1.15 |
| 5.63 | PRKCSH    | 48255891  | protein kinase C substrate 80K-H isoform 2                                               | Non-cytosolic | 3 | 0.70 | 0.27 | 1.25 | 0.77 | 0.41 | 1.25 |
| 5.6  | SLC25A24  | 33598954  | solute carrier family 25 member 24 isoform 1                                             | Non-cytosolic | 3 | 0.32 | 0.16 | 2.05 | 0.38 | 0.27 | 2.07 |
| 5.59 | GNB2L1    | 5174447   | guanine nucleotide binding protein (G protein), beta polypeptide 2-like 1                | Non-cytosolic | 4 | 0.88 | 0.46 | 1.15 | 0.88 | 0.52 | 1.15 |
| 5.53 | ABCD3     | 4506341   | ATP-binding cassette, sub-family D, member 3                                             | Non-cytosolic | 3 | 0.73 | 0.20 | 1.29 | 0.84 | 0.33 | 1.33 |
| 5.53 | NAP1L1    | 4758756   | nucleosome assembly protein 1-like 1                                                     | Non-cytosolic | 3 | 0.87 | 0.61 | 1.15 | 0.84 | 0.41 | 1.14 |
| 5.53 | PDCD11    | 70980549  | programmed cell death 11                                                                 | Non-cytosolic | 2 | 1.18 | 0.15 | 1.25 | 1.10 | 0.29 | 1.27 |
| 5.4  | LDHB      | 4557032   | lactate dehydrogenase B                                                                  | Non-cytosolic | 2 | 0.46 | 0.28 | 2.09 | 0.42 | 0.25 | 2.56 |
| 5.39 | ACLY      | 38569423  | ATP citrate lyase isoform 2                                                              | Non-cytosolic | 3 | 1.16 | 0.53 | 1.38 | 1.09 | 0.69 | 1.38 |
| 5.36 | TBL3      | 19913369  | transducin beta-like 3                                                                   | Non-cytosolic | 2 | 0.87 | 0.69 | 1.38 | 0.88 | 0.67 | 1.38 |
| 5.34 | IARS      | 94721241  | isoleucine-tRNA synthetase                                                               | Non-cytosolic | 3 | 1.10 | 0.80 | 1.27 | 1.02 | 0.91 | 1.18 |
| 5.31 | SEC63     | 6005872   | SEC63-like protein                                                                       | Non-cytosolic | 3 | 1.05 | 0.80 | 1.56 | 0.93 | 0.64 | 1.64 |
| 5.26 | COPE      | 40805827  | epsilon subunit of coatomer protein complex isoform c                                    | Non-cytosolic | 2 | 1.47 | 0.50 | 2.09 | 1.58 | 0.44 | 2.09 |
| 5.24 | ESYT1     | 14149680  | family with sequence similarity 62 (C2 domain containing), member A                      | Non-cytosolic | 3 | 0.63 | 0.64 | 1.50 | 0.50 | 0.29 | 1.33 |
| 5.24 | RPL21     | 18104948  | ribosomal protein L21                                                                    | Non-cytosolic | 2 | 1.04 | 0.82 | 1.12 | 1.08 | 0.75 | 1.10 |
| 5.24 | NCAPG     | 21359945  | chromosome condensation protein G                                                        | Non-cytosolic | 2 | 1.05 | 0.68 | 1.16 | 1.04 | 0.83 | 1.19 |
| 5.24 | RIF1      | 56676335  | RAP1 interacting factor 1                                                                | Non-cytosolic | 2 | 0.88 | 0.74 | 1.38 | 0.86 | 0.70 | 1.38 |
| 5.17 | RPS20     | 4506697   | ribosomal protein S20                                                                    | Non-cytosolic | 2 | 1.53 | 0.75 | 1.33 | 1.57 | 0.80 | 1.38 |
| 5.17 | C22orf28  | 7657015   | hypothetical protein LOC51493                                                            | Non-cytosolic | 2 | 1.06 | 0.87 | 1.25 | 1.12 | 0.76 | 1.25 |
| 5.17 | SERBP1    | 66346685  | SERPINE1 mRNA binding protein 1 isoform 4                                                | Non-cytosolic | 2 | 0.98 | 0.98 | 1.38 | 0.95 | 0.86 | 1.38 |
| 5.12 | HNRNPD    | 51477708  | heterogeneous nuclear ribonucleoprotein D isoform d                                      | Non-cytosolic | 3 | 0.98 | 0.98 | 2.09 | 0.94 | 0.86 | 2.09 |
| 5.1  | GEMIN4    | 122939157 | gemin 4                                                                                  | Non-cytosolic | 2 | 1.49 | 0.37 | 2.17 | 1.57 | 0.34 | 2.09 |
| 5.05 | ATP5C1    | 50345988  | ATP synthase, H+ transporting, mitochondrial F1 complex, gamma subunit isoform L (liver) | Non-cytosolic | 2 | 1.01 | 0.87 | 1.15 | 0.99 | 0.80 | 1.15 |
| 5.03 | RPS7      | 4506741   | ribosomal protein S7                                                                     | Non-cytosolic | 1 | 1.54 | 0.84 | 1.37 | 1.49 | 0.61 | 1.34 |
| 5.02 | LMNB2     | 27436951  | lamin B2                                                                                 | Non-cytosolic | 2 | 0.58 | 0.86 | 1.50 | 0.52 | 0.44 | 1.46 |
| 5    | SSRP1     | 4507241   | structure specific recognition protein 1                                                 | Non-cytosolic | 2 | 0.56 | 0.16 | 1.29 | 0.53 | 0.15 | 1.29 |
| 5    | RAC1      | 9845509   | ras-related C3 botulinum toxin substrate 1 isoform Rac1b                                 | Non-cytosolic | 3 | 0.99 | 0.99 | 2.11 | 0.91 | 0.59 | 2.36 |
| 5    | ACTN4     | 12025678  | actinin, alpha 4                                                                         | Non-cytosolic | 4 | 1.06 | 0.89 | 1.16 | 1.01 | 0.92 | 1.11 |
| 4.96 | PRPS1     | 4506127   | phosphoribosyl pyrophosphate synthetase 1                                                | Non-cytosolic | 2 | 0.61 | 0.63 | 1.33 | 0.53 | 0.49 | 1.28 |
| 4.96 | MYO1C     | 124494238 | myosin IC isoform a                                                                      | Non-cytosolic | 2 | 2.03 | 0.06 | 1.63 | 2.56 | 0.02 | 1.69 |
| 4.94 | GTPBP4    | 55953087  | G protein-binding protein CRFG                                                           | Non-cytosolic | 2 | 0.50 | 0.35 | 1.38 | 0.57 | 0.40 | 1.50 |
| 4.92 | PABPC4    | 4504715   | poly A binding protein, cytoplasmic 4                                                    | Non-cytosolic | 2 | 1.09 | 0.81 | 1.14 | 1.05 | 0.88 | 1.14 |
| 4.92 | ABCF1     | 69354671  | ATP-binding cassette, sub-family F, member 1 isoform a                                   | Non-cytosolic | 2 | 0.94 | 0.76 | 1.38 | 1.04 | 0.76 | 1.38 |
| 4.89 | C1QBP     | 4502491   | complement component 1, q subcomponent binding protein                                   | Non-cytosolic | 3 | 1.02 | 0.95 | 1.09 | 1.01 | 1.00 | 1.09 |
| 4.89 | KPNA2     | 4504897   | karyopherin alpha 2                                                                      | Non-cytosolic | 2 | 1.85 | 0.25 | 1.32 | 1.87 | 0.27 | 1.27 |
| 4.89 | RPS12     | 14277700  | ribosomal protein S12                                                                    | Non-cytosolic | 2 | 0.91 | 0.88 | 1.14 | 0.91 | 0.57 | 1.12 |
| 4.87 | ATP1B3    | 4502281   | Na <sup>+</sup> /K <sup>+</sup> -ATPase beta 3 subunit                                   | Non-cytosolic | 2 | 0.82 | 0.45 | 1.18 | 0.81 | 0.45 | 1.19 |
| 4.86 | MYL6      | 88999583  | myosin, light chain 6, alkali, smooth muscle and non-muscle isoform 2                    | Non-cytosolic | 4 | 0.82 | 0.80 | 1.19 | 0.73 | 0.73 | 1.21 |

|      |           |           |                                                                                |               |   |      |      |      |      |      |      |
|------|-----------|-----------|--------------------------------------------------------------------------------|---------------|---|------|------|------|------|------|------|
| 4.83 | GNB2      | 20357529  | guanine nucleotide-binding protein, beta-2 subunit                             | Non-cytosolic | 2 | 0.63 | 0.45 | 2.09 | 0.67 | 0.50 | 2.09 |
| 4.82 | DNM2      | 56549125  | dynamain 2 isoform 4                                                           | Non-cytosolic | 2 | 0.98 | 0.91 | 1.38 | 0.98 | 0.91 | 1.38 |
| 4.79 | RCC2      | 29789090  | RCC1-like                                                                      | Non-cytosolic | 2 | 1.98 | 0.57 | 1.92 | 2.33 | 0.29 | 1.75 |
| 4.74 | ENO1      | 4503571   | enolase 1                                                                      | Non-cytosolic | 3 | 0.88 | 0.86 | 1.47 | 0.92 | 0.96 | 1.57 |
| 4.72 | RRAS2     | 21361416  | related RAS viral (r-ras) oncogene homolog 2                                   | Non-cytosolic | 2 | 1.12 | 0.77 | 2.09 | 1.07 | 0.79 | 2.09 |
| 4.71 | U2AF2     | 60279268  | U2 (RNU2) small nuclear RNA auxiliary factor 2 isoform b                       | Non-cytosolic | 2 | 0.97 | 0.74 | 1.22 | 1.02 | 0.98 | 1.18 |
| 4.66 | COX5A     | 4758038   | cytochrome c oxidase subunit Va                                                | Non-cytosolic | 2 | 0.86 | 0.61 | 1.32 | 0.86 | 0.61 | 1.41 |
| 4.65 | SOAT1     | 49533617  | sterol O-acyltransferase 1                                                     | Non-cytosolic | 2 | 0.36 | 0.05 | 2.51 | 0.42 | 0.10 | 2.58 |
| 4.64 | SYNCRIP   | 23397427  | synaptotagmin binding, cytoplasmic RNA interacting protein                     | Non-cytosolic | 3 | 0.98 | 0.92 | 1.21 | 1.07 | 0.71 | 1.14 |
| 4.62 | COPB2     | 4758032   | coatamer protein complex, subunit beta 2 (beta prime)                          | Non-cytosolic | 2 | 2.21 | 0.18 | 1.45 | 2.49 | 0.13 | 1.47 |
| 4.62 | CFL1      | 5031635   | cofilin 1 (non-muscle)                                                         | Non-cytosolic | 2 | 0.97 | 1.00 | 1.14 | 0.87 | 0.71 | 1.12 |
| 4.62 | IGF2BP3   | 30795212  | insulin-like growth factor 2 mRNA binding protein 3                            | Non-cytosolic | 2 | 1.05 | 0.52 | 1.18 | 1.05 | 0.67 | 1.19 |
| 4.56 | PSMA1     | 4506179   | proteasome alpha 1 subunit isoform 2                                           | Non-cytosolic | 2 | 1.02 | 0.92 | 1.14 | 0.99 | 0.93 | 1.14 |
| 4.55 | MANF      | 54873600  | arginine-rich, mutated in early stage tumors                                   | Non-cytosolic | 2 | 1.34 | 0.33 | 1.25 | 1.21 | 0.45 | 1.25 |
| 4.53 | ATXN2L    | 27262649  | ataxin 2 related protein isoform C                                             | Non-cytosolic | 2 | 0.95 | 0.92 | 1.37 | 0.90 | 0.65 | 1.25 |
| 4.53 | KIAA0020  | 109948283 | KIAA0020 protein                                                               | Non-cytosolic | 2 | 0.80 | 0.68 | 2.09 | 0.91 | 0.87 | 2.09 |
| 4.52 | HSPB1     | 4504517   | heat shock 27kDa protein 1                                                     | Non-cytosolic | 3 | 0.21 | 0.30 | 1.80 | 0.24 | 0.33 | 1.75 |
| 4.5  | PSIP1     | 19923653  | PC4 and SFRS1 interacting protein 1 isoform 2                                  | Non-cytosolic | 2 | 0.94 | 0.61 | 1.12 | 0.91 | 0.60 | 1.14 |
| 4.48 | LOC389435 | 88999528  | PREDICTED: similar to 60S ribosomal protein L27a                               | Non-cytosolic | 2 | 0.97 | 0.94 | 2.09 | 1.02 | 0.91 | 2.23 |
| 4.47 | CKAP5     | 57222563  | colonic and hepatic tumor over-expressed protein isoform b                     | Non-cytosolic | 2 | 1.01 | 0.96 | 2.09 | 1.00 | 0.99 | 2.68 |
| 4.46 | KIAA0368  | 122937211 | KIAA0368 protein                                                               | Non-cytosolic | 2 | 1.26 | 0.65 | 2.09 | 1.25 | 0.66 | 2.09 |
| 4.44 | LOC388720 | 88952640  | PREDICTED: similar to ubiquitin and ribosomal protein S27a                     | Non-cytosolic | 2 | 1.18 | 0.93 | 1.24 | 0.97 | 0.96 | 1.31 |
| 4.43 | TKT       | 4507521   | transketolase                                                                  | Non-cytosolic | 3 | 1.03 | 0.93 | 2.09 | 0.99 | 0.99 | 2.25 |
| 4.43 | PMPCA     | 24308013  | peptidase (mitochondrial processing) alpha                                     | Non-cytosolic | 2 | 0.97 | 1.00 | 1.25 | 0.95 | 0.88 | 1.25 |
| 4.43 | PELP1     | 24415383  | proline-, glutamic acid-, leucine-rich protein 1                               | Non-cytosolic | 2 | 1.01 | 0.93 | 1.17 | 1.02 | 0.98 | 1.13 |
| 4.43 | ATAD3A    | 42476028  | ATPase family, AAA domain containing 3A                                        | Non-cytosolic | 2 | 1.09 | 0.84 | 2.09 | 1.10 | 0.84 | 2.09 |
| 4.41 | CALM1     | 5901912   | calmodulin 1                                                                   | Non-cytosolic | 2 | 0.79 | 0.68 | 1.38 | 0.74 | 0.60 | 1.38 |
| 4.41 | LOC401206 | 88988836  | PREDICTED: similar to 40S ribosomal protein S25                                | Non-cytosolic | 2 | 1.21 | 0.44 | 1.19 | 1.19 | 0.43 | 1.18 |
| 4.4  | RPL38     | 78214522  | ribosomal protein L38                                                          | Non-cytosolic | 2 | 2.03 | 0.20 | 1.26 | 1.87 | 0.19 | 1.25 |
| 4.39 | RCN1      | 4506455   | reticulocalbin 1                                                               | Non-cytosolic | 2 | 0.82 | 0.52 | 1.13 | 0.81 | 0.57 | 1.13 |
| 4.39 | DDX1      | 4826686   | DEAD (Asp-Glu-Ala-Asp) box polypeptide 1                                       | Non-cytosolic | 2 | 1.38 | 0.43 | 1.34 | 1.49 | 0.70 | 1.49 |
| 4.37 | SNRPN     | 4507135   | small nuclear ribonucleoprotein polypeptide N                                  | Non-cytosolic | 1 | 1.07 | 0.46 | 1.20 | 1.05 | 0.62 | 1.17 |
| 4.37 | RPL10L    | 18152783  | ribosomal protein L10-like protein                                             | Non-cytosolic | 2 | 1.05 | 0.56 | 1.09 | 1.05 | 0.53 | 1.09 |
| 4.35 | RPL8      | 4506663   | ribosomal protein L8                                                           | Non-cytosolic | 2 | 1.02 | 0.94 | 1.20 | 0.96 | 0.73 | 1.21 |
| 4.33 | SLC7A5    | 71979932  | solute carrier family 7, member 5                                              | Non-cytosolic | 2 | 1.56 | 0.20 | 1.20 | 1.50 | 0.20 | 1.19 |
| 4.32 | ALPL      | 116734717 | tissue non-specific alkaline phosphatase                                       | Non-cytosolic | 2 | 1.17 | 0.61 | 1.38 | 1.16 | 0.68 | 1.38 |
| 4.29 | DNMT1     | 4503351   | DNA (cytosine-5-)-methyltransferase 1                                          | Non-cytosolic | 2 | 0.38 | 0.33 | 1.84 | 0.56 | 0.97 | 1.75 |
| 4.29 | FUBP1     | 17402900  | far upstream element-binding protein                                           | Non-cytosolic | 3 | 1.94 | 0.25 | 1.53 | 2.38 | 0.20 | 1.54 |
| 4.25 | LEFTY1    | 10337603  | left-right determination, factor B preproprotein                               | Non-cytosolic | 2 | 2.01 | 0.11 | 1.61 | 1.74 | 0.12 | 1.43 |
| 4.24 | RANBP2    | 6382079   | RAN binding protein 2                                                          | Non-cytosolic | 2 | 0.87 | 0.66 | 1.31 | 0.79 | 0.43 | 1.25 |
| 4.23 | API5      | 5729730   | apoptosis inhibitor 5                                                          | Non-cytosolic | 2 | 0.89 | 0.66 | 1.89 | 0.84 | 0.52 | 1.38 |
| 4.23 | ERLIN2    | 6005721   | SPFH domain family, member 2 isoform 1                                         | Non-cytosolic | 2 | 0.69 | 0.53 | 2.09 | 0.74 | 0.59 | 2.09 |
| 4.22 | ATP13A1   | 9966897   | ATPase type 13A1                                                               | Non-cytosolic | 2 | 0.97 | 0.93 | 1.60 | 1.07 | 0.77 | 1.38 |
| 4.21 | SEC61A1   | 7019415   | Sec61 alpha 1 subunit                                                          | Non-cytosolic | 2 | 1.45 | 0.50 | 2.11 | 1.29 | 0.59 | 2.09 |
| 4.2  | TPR       | 114155142 | nuclear pore complex-associated protein TPR                                    | Non-cytosolic | 2 | 0.90 | 0.80 | 1.67 | 0.77 | 0.62 | 1.38 |
| 4.19 | EIF4A1    | 4503529   | eukaryotic translation initiation factor 4A isoform 1                          | Non-cytosolic | 5 | 1.67 | 0.44 | 1.26 | 1.74 | 0.39 | 1.26 |
| 4.19 | RPL24     | 4506619   | ribosomal protein L24                                                          | Non-cytosolic | 2 | 1.38 | 0.43 | 1.24 | 1.26 | 0.49 | 1.25 |
| 4.17 | HSD17B12  | 7705855   | steroid dehydrogenase homolog                                                  | Non-cytosolic | 2 | 0.36 | 0.16 | 1.45 | 0.34 | 0.15 | 1.47 |
| 4.15 | SLC7A3    | 114326550 | solute carrier family 7 (cationic amino acid transporter, y+ system), member 3 | Non-cytosolic | 2 | 1.07 | 0.69 | 1.12 | 1.04 | 0.70 | 1.12 |
| 4.13 | FKBP4     | 4503729   | FK506-binding protein 4                                                        | Non-cytosolic | 2 | 0.29 | 0.08 | 1.56 | 0.26 | 0.07 | 1.69 |
| 4.13 | PGK1      | 4505763   | phosphoglycerate kinase 1                                                      | Non-cytosolic | 2 | 0.38 | 0.62 | 1.71 | 0.37 | 0.59 | 1.66 |
| 4.13 | CHD1      | 68299795  | chromodomain helicase DNA binding protein 1                                    | Non-cytosolic | 2 | 0.86 | 0.62 | 1.38 | 0.81 | 0.61 | 1.43 |
| 4.12 | IQGAP1    | 4506787   | IQ motif containing GTPase activating protein 1                                | Non-cytosolic | 3 | 1.16 | 0.73 | 1.38 | 1.18 | 0.75 | 1.61 |
| 4.12 | HAOHA     | 20127408  | mitochondrial trifunctional protein, alpha subunit                             | Non-cytosolic | 2 | 0.93 | 0.64 | 1.18 | 0.99 | 0.90 | 1.20 |
| 4.12 | RPL32     | 55743130  | ribosomal protein L32                                                          | Non-cytosolic | 2 | 0.96 | 0.90 | 1.38 | 1.00 | 0.99 | 1.38 |
| 4.11 | RPL9      | 67944630  | ribosomal protein L9                                                           | Non-cytosolic | 1 | 1.74 | 0.16 | 1.36 | 1.54 | 0.30 | 1.29 |
| 4.1  | LRP1      | 126012562 | low density lipoprotein-related protein 1                                      | Non-cytosolic | 2 | 0.87 | 0.76 | 1.38 | 0.86 | 0.71 | 1.38 |
| 4.09 | DAG1      | 4758116   | dystroglycan 1                                                                 | Non-cytosolic | 2 | 0.76 | 0.62 | 2.09 | 0.83 | 0.73 | 2.09 |
| 4.09 | HDLBP     | 4885409   | high density lipoprotein binding protein                                       | Non-cytosolic | 2 | 1.33 | 0.57 | 2.09 | 1.22 | 0.67 | 2.09 |
| 4.09 | CCDC109A  | 24308400  | coiled-coil domain containing 109A                                             | Non-cytosolic | 2 | 1.15 | 0.35 | 1.25 | 1.15 | 0.48 | 1.17 |
| 4.09 | MYO1B     | 44889481  | myosin IB                                                                      | Non-cytosolic | 2 | 0.77 | 0.58 | 2.09 | 0.61 | 0.37 | 2.11 |

|      |          |           |                                                                            |               |   |      |      |      |      |      |       |
|------|----------|-----------|----------------------------------------------------------------------------|---------------|---|------|------|------|------|------|-------|
| 4.08 | GLS      | 21361452  | glutaminase C                                                              | Non-cytosolic | 2 | 0.90 | 0.59 | 1.20 | 0.93 | 0.83 | 1.32  |
| 4.08 | GTPBP1   | 82546879  | GTP binding protein 1                                                      | Non-cytosolic | 2 | 1.12 | 0.82 | 2.11 | 1.26 | 0.65 | 2.09  |
| 4.07 | EIF2S3   | 4503507   | eukaryotic translation initiation factor 2, subunit 3 gamma, 52kDa         | Non-cytosolic | 2 | 1.09 | 0.78 | 1.25 | 1.09 | 0.73 | 1.25  |
| 4.07 | PLS3     | 7549809   | plastin 3                                                                  | Non-cytosolic | 2 | 0.65 | 0.48 | 2.11 | 0.69 | 0.52 | 2.09  |
| 4.07 | TOP2B    | 19913408  | DNA topoisomerase II, beta isozyme                                         | Non-cytosolic | 6 | 0.94 | 0.80 | 1.15 | 0.96 | 0.88 | 1.15  |
| 4.07 | TMED9    | 39725636  | transmembrane emp24 protein transport domain containing 9                  | Non-cytosolic | 2 | 1.03 | 0.94 | 2.09 | 1.01 | 0.97 | 2.09  |
| 4.06 | CPSF6    | 5901928   | cleavage and polyadenylation specific factor 6, 68 kD subunit              | Non-cytosolic | 3 | 2.11 | 0.43 | 1.31 | 2.11 | 0.45 | 1.36  |
| 4.06 | DNMT3A   | 28559069  | DNA cytosine methyltransferase 3 alpha isoform a                           | Non-cytosolic | 2 | 0.97 | 0.89 | 1.60 | 1.16 | 0.79 | 1.38  |
| 4.05 | LRWD1    | 23097240  | hypothetical protein LOC222229                                             | Non-cytosolic | 2 | 0.89 | 0.80 | 2.09 | 0.76 | 0.63 | 2.11  |
| 4.05 | BMS1     | 41281483  | BMS1-like, ribosome assembly protein                                       | Non-cytosolic | 2 | 0.99 | 1.00 | 1.25 | 1.07 | 0.87 | 1.25  |
| 4.04 | GJA1     | 4504001   | connexin 43                                                                | Non-cytosolic | 2 | 2.29 | 0.33 | 1.39 | 2.54 | 0.30 | 1.46  |
| 4.04 | RPS17    | 4506693   | ribosomal protein S17                                                      | Non-cytosolic | 2 | 1.10 | 0.41 | 1.12 | 1.08 | 0.48 | 1.12  |
| 4.04 | MCM3     | 6631095   | minichromosome maintenance protein 3                                       | Non-cytosolic | 2 | 1.00 | 0.99 | 4.88 | 1.02 | 0.91 | 2.19  |
| 4.04 | PRDX5    | 6912238   | peroxiredoxin 5, isoform a                                                 | Non-cytosolic | 2 | 0.90 | 0.81 | 1.25 | 0.95 | 0.93 | 1.25  |
| 4.04 | DNAJC11  | 8922629   | Dnaj (Hsp40) homolog, subfamily C, member 11                               | Non-cytosolic | 2 | 1.06 | 0.87 | 2.11 | 0.89 | 0.76 | 2.63  |
| 4.04 | LYAR     | 8923398   | hypothetical protein FLJ20425                                              | Non-cytosolic | 2 | 0.59 | 0.31 | 2.09 | 0.68 | 0.41 | 2.17  |
| 4.04 | RRP12    | 15987121  | ribosomal RNA processing 12 homolog                                        | Non-cytosolic | 2 | 1.02 | 0.95 | 1.25 | 1.03 | 0.88 | 1.25  |
| 4.04 | EHD2     | 21361462  | EH-domain containing 2                                                     | Non-cytosolic | 2 | 1.98 | 0.45 | 1.34 | 1.82 | 0.51 | 1.37  |
| 4.04 | FKBP10   | 21361895  | FK506 binding protein 10, 65 kDa                                           | Non-cytosolic | 2 | 1.19 | 0.72 | 2.09 | 1.05 | 0.91 | 2.09  |
| 4.04 | UGP2     | 48255968  | UDP-glucose pyrophosphorylase 2 isoform b                                  | Non-cytosolic | 2 | 1.98 | 0.52 | 1.58 | 2.44 | 0.39 | 1.53  |
| 4.04 | NHP2L1   | 51317376  | NHP2 non-histone chromosome protein 2-like 1                               | Non-cytosolic | 2 | 0.79 | 0.60 | 1.18 | 0.79 | 0.57 | 1.18  |
| 4.04 | 2-Sep    | 56549640  | septin 2                                                                   | Non-cytosolic | 3 | 0.60 | 0.34 | 1.38 | 0.66 | 0.40 | 1.38  |
| 4.04 | IMPDH2   | 66933016  | inosine monophosphate dehydrogenase 2                                      | Non-cytosolic | 2 | 0.97 | 0.96 | 1.18 | 0.99 | 0.94 | 1.29  |
| 4.03 | CDC2     | 4502709   | cell division cycle 2 protein isoform 1                                    | Non-cytosolic | 2 | 1.08 | 0.87 | 1.25 | 1.09 | 0.95 | 1.37  |
| 4.03 | PRPSAP2  | 4506133   | phosphoribosyl pyrophosphate synthetase-associated protein 2               | Non-cytosolic | 2 | 1.09 | 0.54 | 1.79 | 1.22 | 0.41 | 1.38  |
| 4.03 | XPO1     | 4507943   | exportin 1                                                                 | Non-cytosolic | 2 | 1.04 | 0.82 | 1.38 | 0.98 | 0.96 | 1.38  |
| 4.03 | CORO1C   | 7656991   | coronin, actin binding protein, 1C                                         | Non-cytosolic | 2 | 0.89 | 0.78 | 2.09 | 0.87 | 0.75 | 2.09  |
| 4.03 | CAV1     | 15451856  | caveolin 1                                                                 | Non-cytosolic | 2 | 1.34 | 0.24 | 1.42 | 1.50 | 0.21 | 1.41  |
| 4.03 | BRD4     | 19718731  | bromodomain-containing protein 4 isoform long                              | Non-cytosolic | 2 | 0.85 | 0.48 | 1.38 | 0.91 | 0.74 | 1.38  |
| 4.03 | PON2     | 66529396  | paraoxonase 2 isoform 2                                                    | Non-cytosolic | 2 | 0.29 | 0.37 | 2.05 | 0.28 | 0.34 | 2.11  |
| 4.02 | SPARC    | 4507171   | secreted protein, acidic, cysteine-rich (osteonectin)                      | Non-cytosolic | 2 | 0.39 | 0.38 | 1.60 | 0.52 | 0.52 | 1.41  |
| 4.02 | TM9SF2   | 4758874   | transmembrane 9 superfamily member 2                                       | Non-cytosolic | 2 | 1.17 | 0.69 | 6.25 | 1.06 | 0.82 | 10.76 |
| 4.02 | SLC2A3   | 5902090   | solute carrier family 2 (facilitated glucose transporter), member 3        | Non-cytosolic | 3 | 0.25 | 0.21 | 1.38 | 0.24 | 0.21 | 1.41  |
| 4.02 | MYBBP1A  | 7657351   | MYB binding protein 1a                                                     | Non-cytosolic | 2 | 0.92 | 0.88 | 2.09 | 0.81 | 0.69 | 2.09  |
| 4.02 | PACSN3   | 19224660  | protein kinase C and casein kinase substrate in neurons 3                  | Non-cytosolic | 2 | 1.11 | 0.56 | 3.25 | 1.10 | 0.57 | 2.23  |
| 4.02 | PSMC5    | 24497435  | proteasome 26S ATPase subunit 5                                            | Non-cytosolic | 2 | 0.99 | 1.00 | 1.10 | 0.98 | 0.99 | 1.10  |
| 4.02 | TIMM44   | 33636719  | translocase of inner mitochondrial membrane 44                             | Non-cytosolic | 2 | 0.89 | 0.95 | 1.71 | 0.95 | 0.97 | 1.71  |
| 4.02 | TBRG4    | 40217812  | cell cycle progression 2 protein isoform 1                                 | Non-cytosolic | 2 | 0.93 | 0.96 | 1.18 | 0.90 | 0.87 | 1.14  |
| 4.02 | CCDC51   | 94536784  | coiled-coil domain containing 51                                           | Non-cytosolic | 2 | 1.12 | 0.72 | 2.09 | 1.10 | 0.76 | 2.91  |
| 4.01 | RPS24    | 4506703   | ribosomal protein S24 isoform c                                            | Non-cytosolic | 3 | 1.00 | 0.91 | 1.18 | 1.00 | 0.97 | 1.18  |
| 4.01 | CLPX     | 7242140   | ClpX caseinolytic protease X homolog                                       | Non-cytosolic | 2 | 1.05 | 0.86 | 1.25 | 1.13 | 0.78 | 1.25  |
| 4.01 | HMOX2    | 8051608   | heme oxygenase (decyclizing) 2                                             | Non-cytosolic | 2 | 1.10 | 0.91 | 1.47 | 1.16 | 0.65 | 1.27  |
| 4.01 | CMAS     | 8923900   | cytidine 5'-monophosphate N-acetylneuraminic acid synthetase               | Non-cytosolic | 2 | 0.57 | 0.59 | 2.19 | 0.52 | 0.45 | 1.45  |
| 4.01 | DAGLB    | 21040277  | diacylglycerol lipase beta                                                 | Non-cytosolic | 2 | 0.99 | 0.96 | 1.42 | 1.05 | 0.75 | 1.29  |
| 4.01 | TTC17    | 21361787  | tetratricopeptide repeat domain 17                                         | Non-cytosolic | 2 | 0.82 | 0.71 | 2.11 | 0.89 | 0.82 | 2.09  |
| 4.01 | EHMT1    | 40217808  | euchromatic histone methyltransferase 1                                    | Non-cytosolic | 2 | 0.90 | 0.79 | 6.49 | 0.82 | 0.65 | 4.13  |
| 4.01 | UQCRC1   | 46593007  | ubiquinol-cytochrome c reductase core protein I                            | Non-cytosolic | 2 | 1.03 | 0.95 | 2.09 | 1.06 | 0.90 | 2.09  |
| 4.01 | GPX8     | 56606000  | hypothetical protein LOC493869                                             | Non-cytosolic | 2 | 0.90 | 0.71 | 1.25 | 0.86 | 0.55 | 1.25  |
| 4.01 | FLOT2    | 94538362  | flotillin 2                                                                | Non-cytosolic | 2 | 0.96 | 0.86 | 1.12 | 0.95 | 0.87 | 1.12  |
| 4.01 | SMU1     | 109948304 | smu-1 suppressor of mec-8 and unc-52 homolog                               | Non-cytosolic | 2 | 1.12 | 0.76 | 1.14 | 0.95 | 0.92 | 1.19  |
| 4.01 | LUC7L2   | 116812577 | LUC7-like 2                                                                | Non-cytosolic | 2 | 0.96 | 0.96 | 2.09 | 0.94 | 0.91 | 2.09  |
| 4    | CHEK1    | 4502803   | CHK1 checkpoint homolog                                                    | Non-cytosolic | 2 | 0.95 | 0.94 | 2.09 | 0.98 | 0.98 | 2.09  |
| 4    | COX4I1   | 4502981   | cytochrome c oxidase subunit IV isoform 1                                  | Non-cytosolic | 2 | 0.98 | 0.99 | 2.96 | 1.05 | 0.90 | 2.09  |
| 4    | RPL30    | 4506631   | ribosomal protein L30                                                      | Non-cytosolic | 2 | 1.08 | 0.73 | 1.18 | 1.09 | 0.77 | 1.24  |
| 4    | RPL31    | 4506633   | ribosomal protein L31                                                      | Non-cytosolic | 2 | 1.10 | 0.78 | 1.18 | 1.16 | 0.69 | 1.18  |
| 4    | S100A10  | 4506761   | S100 calcium binding protein A10                                           | Non-cytosolic | 2 | 1.34 | 0.30 | 1.20 | 1.17 | 0.35 | 1.39  |
| 4    | TMPO     | 4507555   | thymopoietin isoform alpha                                                 | Non-cytosolic | 4 | 1.38 | 0.46 | 1.25 | 1.22 | 0.74 | 1.39  |
| 4    | DAP3     | 4758118   | death-associated protein 3                                                 | Non-cytosolic | 2 | 0.90 | 0.89 | 1.15 | 0.90 | 0.91 | 1.15  |
| 4    | NDUFB10  | 4758774   | NADH dehydrogenase (ubiquinone) 1 beta subcomplex, 10, 22kDa               | Non-cytosolic | 2 | 0.96 | 0.90 | 1.18 | 0.95 | 0.86 | 1.18  |
| 4    | SLC9A3R1 | 4759140   | solute carrier family 9 (sodium/hydrogen exchanger), isoform 3 regulator 1 | Non-cytosolic | 2 | 1.00 | 0.99 | 2.09 | 0.84 | 0.75 | 2.11  |
| 4    | NME4     | 4826862   | nucleoside-diphosphate kinase 4                                            | Non-cytosolic | 2 | 0.44 | 0.33 | 2.21 | 0.33 | 0.32 | 3.28  |

|      |           |           |                                                                                |               |   |      |      |      |      |      |      |
|------|-----------|-----------|--------------------------------------------------------------------------------|---------------|---|------|------|------|------|------|------|
| 4    | BCAS2     | 5031653   | breast carcinoma amplified sequence 2                                          | Non-cytosolic | 2 | 0.87 | 0.69 | 1.25 | 0.85 | 0.65 | 1.25 |
| 4    | EBNA1BP2  | 5803111   | EBNA1 binding protein 2                                                        | Non-cytosolic | 2 | 0.86 | 0.38 | 1.38 | 0.79 | 0.36 | 1.38 |
| 4    | GDI2      | 6598323   | GDP dissociation inhibitor 2                                                   | Non-cytosolic | 2 | 1.07 | 0.90 | 1.60 | 0.99 | 0.93 | 2.00 |
| 4    | SLC25A13  | 7657581   | solute carrier family 25, member 13 (citrin)                                   | Non-cytosolic | 2 | 0.72 | 0.57 | 2.11 | 0.79 | 0.66 | 2.09 |
| 4    | SEC11A    | 7657609   | SEC11-like 1                                                                   | Non-cytosolic | 2 | 0.83 | 0.97 | 1.31 | 0.77 | 0.97 | 1.36 |
| 4    | RPS27L    | 7705706   | ribosomal protein S27-like                                                     | Non-cytosolic | 2 | 1.05 | 0.31 | 1.38 | 1.05 | 0.31 | 1.38 |
| 4    | NOP58     | 7706254   | nucleolar protein NOP5/NOP58                                                   | Non-cytosolic | 2 | 0.88 | 0.77 | 1.15 | 0.83 | 0.64 | 1.15 |
| 4    | CDH3      | 14589891  | cadherin 3, type 1 preproprotein                                               | Non-cytosolic | 2 | 2.31 | 0.77 | 1.96 | 3.05 | 0.56 | 1.92 |
| 4    | ZMPSTE24  | 18379366  | zinc metalloproteinase STE24                                                   | Non-cytosolic | 3 | 1.04 | 0.76 | 1.25 | 1.03 | 0.86 | 1.25 |
| 4    | DAZAP1    | 25470890  | DAZ associated protein 1 isoform a                                             | Non-cytosolic | 2 | 0.99 | 0.98 | 1.21 | 0.99 | 0.99 | 1.18 |
| 4    | NUP35     | 31982904  | nucleoporin 35kDa isoform a                                                    | Non-cytosolic | 2 | 0.91 | 0.87 | 2.09 | 0.89 | 0.84 | 2.09 |
| 4    | BCAP31    | 32171186  | B-cell receptor-associated protein 31                                          | Non-cytosolic | 2 | 1.04 | 0.86 | 3.22 | 0.95 | 0.88 | 4.70 |
| 4    | ACSL3     | 42794754  | acyl-CoA synthetase long-chain family member 3                                 | Non-cytosolic | 2 | 0.89 | 0.70 | 1.18 | 0.90 | 0.72 | 1.18 |
| 4    | FASTKD2   | 45267832  | FAST kinase domains 2                                                          | Non-cytosolic | 2 | 1.25 | 0.66 | 2.09 | 1.20 | 0.71 | 2.11 |
| 4    | MAP4      | 47519639  | microtubule-associated protein 4 isoform 1                                     | Non-cytosolic | 2 | 1.15 | 0.69 | 2.09 | 1.22 | 0.60 | 2.09 |
| 4    | GRSF1     | 53759145  | G-rich RNA sequence binding factor 1                                           | Non-cytosolic | 3 | 2.68 | 0.24 | 2.11 | 2.01 | 0.32 | 2.11 |
| 4    | LOC650283 | 88952891  | PREDICTED: similar to 40S ribosomal protein S15 (RIG protein)                  | Non-cytosolic | 3 | 1.37 | 0.59 | 1.18 | 1.25 | 0.91 | 1.28 |
| 4    | LOC643752 | 88983788  | PREDICTED: similar to RAS related protein 1b                                   | Non-cytosolic | 2 | 1.01 | 0.92 | 1.16 | 0.98 | 1.00 | 1.14 |
| 4    | LOC652826 | 89064750  | PREDICTED: similar to 26S protease regulatory subunit 6B (TBP-7)               | Non-cytosolic | 2 | 1.05 | 0.86 | 1.25 | 1.03 | 0.89 | 1.25 |
| 4    | OSGEP1    | 116812636 | O-sialoglycoprotein endopeptidase-like 1                                       | Non-cytosolic | 2 | 1.03 | 0.93 | 2.38 | 1.02 | 0.94 | 8.71 |
| 3.77 | WDR3      | 5803221   | WD repeat-containing protein 3                                                 | Non-cytosolic | 2 | 0.79 | 0.41 | 2.09 | 0.77 | 0.38 | 2.09 |
| 3.77 | HNRNPAB   | 55956921  | heterogeneous nuclear ribonucleoprotein AB isoform b                           | Non-cytosolic | 2 | 1.01 | 0.75 | 1.14 | 1.09 | 0.62 | 1.14 |
| 3.76 | PDHB      | 4505687   | pyruvate dehydrogenase (lipoamide) beta                                        | Non-cytosolic | 2 | 0.87 | 0.74 | 1.26 | 0.86 | 0.71 | 1.37 |
| 3.76 | LPHN2     | 6912464   | latrophilin 2                                                                  | Non-cytosolic | 2 | 0.86 | 0.74 | 2.09 | 0.94 | 0.89 | 2.51 |
| 3.76 | LUC7L     | 8922297   | LUC7-like isoform a                                                            | Non-cytosolic | 2 | 0.85 | 0.50 | 1.38 | 0.86 | 0.42 | 1.38 |
| 3.75 | RPL11     | 15431290  | ribosomal protein L11                                                          | Non-cytosolic | 2 | 1.72 | 0.45 | 1.37 | 1.67 | 0.49 | 1.39 |
| 3.73 | KHSRP     | 4504865   | KH-type splicing regulatory protein (FUSE binding protein 2)                   | Non-cytosolic | 2 | 1.05 | 0.81 | 1.41 | 1.02 | 0.98 | 1.41 |
| 3.73 | SLC25A3   | 6031192   | solute carrier family 25 member 3 isoform a                                    | Non-cytosolic | 1 | 0.68 | 0.45 | 1.28 | 0.56 | 0.37 | 1.38 |
| 3.73 | OPA1      | 18860845  | optic atrophy 1 isoform 8                                                      | Non-cytosolic | 2 | 0.82 | 0.62 | 2.56 | 0.84 | 0.67 | 2.25 |
| 3.72 | WDR36     | 21281677  | WD repeat domain 36                                                            | Non-cytosolic | 2 | 0.79 | 0.66 | 2.09 | 0.99 | 1.00 | 2.09 |
| 3.72 | PHGDH     | 23308577  | phosphoglycerate dehydrogenase                                                 | Non-cytosolic | 2 | 0.94 | 0.56 | 1.21 | 0.91 | 0.53 | 1.24 |
| 3.71 | PSMD6     | 7661914   | proteasome (prosome, macropain) 26S subunit, non-ATPase, 6                     | Non-cytosolic | 2 | 1.16 | 0.82 | 1.15 | 1.21 | 0.67 | 1.13 |
| 3.71 | AGK       | 8922701   | multiple substrate lipid kinase                                                | Non-cytosolic | 2 | 0.76 | 0.62 | 1.25 | 0.77 | 0.62 | 1.25 |
| 3.7  | EPHX1     | 4503583   | epoxide hydrolase 1, microsomal (xenobiotic)                                   | Non-cytosolic | 2 | 1.03 | 0.91 | 1.91 | 1.08 | 0.91 | 1.75 |
| 3.7  | PWP1      | 5902034   | periodic tryptophan protein 1                                                  | Non-cytosolic | 2 | 1.07 | 0.88 | 2.09 | 1.09 | 0.86 | 2.09 |
| 3.7  | TXLNA     | 28460688  | taxilin                                                                        | Non-cytosolic | 2 | 1.05 | 0.79 | 4.25 | 1.05 | 0.81 | 4.57 |
| 3.7  | EPHA1     | 56119207  | ephrin receptor EphA1                                                          | Non-cytosolic | 2 | 1.13 | 0.79 | 2.09 | 0.96 | 0.95 | 2.09 |
| 3.66 | MLEC      | 7661948   | hypothetical protein LOC9761                                                   | Non-cytosolic | 1 | 0.89 | 0.37 | 1.24 | 0.93 | 0.56 | 1.25 |
| 3.58 | TTN       | 110349719 | titin isoform N2-A                                                             | Non-cytosolic | 0 | 1.06 | 0.87 | 1.16 | 1.02 | 0.95 | 1.15 |
| 3.57 | GLG1      | 54633312  | golgi apparatus protein 1                                                      | Non-cytosolic | 1 | 0.94 | 0.43 | 1.18 | 0.90 | 0.32 | 1.18 |
| 3.55 | PRDX6     | 4758638   | peroxiredoxin 6                                                                | Non-cytosolic | 2 | 1.08 | 0.79 | 1.15 | 1.17 | 0.78 | 1.16 |
| 3.53 | RECQL     | 14591904  | RecQ protein-like isoform 1                                                    | Non-cytosolic | 2 | 0.80 | 0.56 | 2.11 | 0.77 | 0.48 | 2.09 |
| 3.51 | ADD1      | 29826325  | adducin 1 (alpha) isoform d                                                    | Non-cytosolic | 1 | 1.11 | 0.84 | 1.79 | 1.11 | 0.81 | 1.38 |
| 3.5  | NID1      | 115298674 | nidogen 1                                                                      | Non-cytosolic | 2 | 1.27 | 0.38 | 2.11 | 1.21 | 0.52 | 2.09 |
| 3.44 | ARCN1     | 11863154  | archain                                                                        | Non-cytosolic | 2 | 0.98 | 0.98 | 8.39 | 1.03 | 0.73 | 5.45 |
| 3.43 | KPNB1     | 19923142  | karyopherin beta 1                                                             | Non-cytosolic | 2 | 1.12 | 0.68 | 1.19 | 1.10 | 0.67 | 1.18 |
| 3.42 | PSMD3     | 25777612  | proteasome 26S non-ATPase subunit 3                                            | Non-cytosolic | 2 | 1.24 | 0.65 | 2.09 | 1.29 | 0.60 | 2.09 |
| 3.41 | DDOST     | 20070197  | dolichyl-diphosphooligosaccharide-protein glycosyltransferase                  | Non-cytosolic | 1 | 0.95 | 0.81 | 1.31 | 0.94 | 0.73 | 1.25 |
| 3.41 | ATAD3B    | 75677353  | AAA-ATPase TOB3                                                                | Non-cytosolic | 2 | 1.31 | 0.52 | 2.09 | 1.29 | 0.53 | 2.09 |
| 3.4  | ATP5J2    | 85794908  | ATP synthase, H+ transporting, mitochondrial F0 complex, subunit F2 isoform 2d | Non-cytosolic | 2 | 0.95 | 0.94 | 1.38 | 0.95 | 0.92 | 1.38 |
| 3.4  | LOC653566 | 88947627  | PREDICTED: similar to Signal peptidase complex subunit 2                       | Non-cytosolic | 2 | 0.96 | 0.92 | 1.29 | 0.89 | 0.77 | 1.25 |
| 3.38 | STT3A     | 22749415  | integral membrane protein 1                                                    | Non-cytosolic | 1 | 1.03 | 0.82 | 1.28 | 0.95 | 0.79 | 1.26 |
| 3.38 | NES       | 38176300  | nestin                                                                         | Non-cytosolic | 1 | 1.49 | 0.19 | 1.38 | 1.42 | 0.23 | 1.38 |
| 3.37 | FLNB      | 105990514 | filamin B, beta (actin binding protein 278)                                    | Non-cytosolic | 3 | 1.03 | 0.94 | 2.09 | 0.89 | 0.83 | 2.09 |
| 3.36 | AP2M1     | 68799814  | adaptor-related protein complex 2, mu 1 subunit isoform b                      | Non-cytosolic | 1 | 1.02 | 0.96 | 1.38 | 1.06 | 0.87 | 1.38 |
| 3.32 | EDC4      | 45827771  | autoantigen RCD8                                                               | Non-cytosolic | 1 | 1.10 | 0.84 | 2.09 | 0.98 | 0.99 | 3.44 |
| 3.31 | NT5DC2    | 12597653  | 5'-nucleotidase domain containing 2                                            | Non-cytosolic | 2 | 3.25 | 0.20 | 2.11 | 3.77 | 0.18 | 2.11 |
| 3.31 | RPL7L1    | 50053872  | ribosomal protein L7-like 1                                                    | Non-cytosolic | 2 | 1.06 | 0.84 | 1.38 | 0.95 | 0.80 | 1.39 |
| 3.29 | AP3D1     | 117553580 | adaptor-related protein complex 3, delta 1 subunit isoform 2                   | Non-cytosolic | 1 | 1.06 | 0.92 | 1.38 | 1.16 | 0.72 | 1.38 |
| 3.28 | CSE1L     | 29029559  | CSE1 chromosome segregation 1-like protein                                     | Non-cytosolic | 1 | 1.10 | 0.84 | 2.09 | 0.89 | 0.82 | 2.09 |
| 3.23 | NUDT21    | 5901926   | cleavage and polyadenylation specific factor 5                                 | Non-cytosolic | 1 | 1.02 | 0.95 | 2.96 | 0.95 | 0.92 | 2.15 |



|      |           |           |                                                                    |               |    |      |      |       |      |      |       |
|------|-----------|-----------|--------------------------------------------------------------------|---------------|----|------|------|-------|------|------|-------|
| 3.23 | GSTK1     | 7705704   | glutathione transferase kappa 1                                    | Non-cytosolic | 1  | 0.53 | 0.36 | 2.09  | 0.53 | 0.36 | 2.09  |
| 3.23 | VAT1      | 18379349  | vesicle amine transport protein 1                                  | Non-cytosolic | 1  | 1.61 | 0.43 | 2.09  | 1.71 | 0.40 | 2.09  |
| 3.22 | GDF3      | 10190670  | growth differentiation factor 3                                    | Non-cytosolic | 1  | 0.33 | 0.23 | 1.33  | 0.29 | 0.21 | 1.61  |
| 3.2  | MSN       | 4505257   | moesin                                                             | Non-cytosolic | 6  | 0.53 | 0.36 | 2.11  | 0.53 | 0.36 | 2.11  |
| 3.2  | HDAC2     | 116284376 | histone deacetylase 2                                              | Non-cytosolic | 1  | 1.07 | 0.88 | 2.09  | 0.92 | 0.88 | 2.09  |
| 3.16 | INTS1     | 113418916 | PREDICTED: similar to CG3173-PA isoform 11                         | Non-cytosolic | 1  | 0.89 | 0.69 | 2.09  | 1.00 | 0.98 | 2.09  |
| 3.15 | BANF1     | 4502389   | barrier to autointegration factor 1                                | Non-cytosolic | 1  | 1.53 | 0.49 | 1.21  | 1.54 | 0.48 | 1.21  |
| 3.14 | CCDC47    | 9910242   | coiled-coil domain containing 47                                   | Non-cytosolic | 1  | 1.11 | 0.23 | 1.38  | 1.11 | 0.25 | 1.46  |
| 3.14 | NUP205    | 57634534  | nucleoporin 205kDa                                                 | Non-cytosolic | 2  | 1.12 | 0.63 | 1.58  | 1.16 | 0.65 | 1.24  |
| 3.12 | RPS6      | 17158044  | ribosomal protein S6                                               | Non-cytosolic | 1  | 1.07 | 0.68 | 1.25  | 1.03 | 0.86 | 1.25  |
| 3.11 | PDS5A     | 22094121  | SCC-112 protein                                                    | Non-cytosolic | 2  | 1.06 | 0.78 | 2.09  | 0.96 | 0.89 | 2.09  |
| 3.11 | 9-Sep     | 116256489 | septin 9                                                           | Non-cytosolic | 1  | 1.08 | 0.83 | 2.44  | 1.20 | 0.69 | 2.09  |
| 3.1  | MYO18A    | 28416946  | myosin 18A isoform a                                               | Non-cytosolic | 1  | 1.08 | 0.70 | 2.09  | 1.02 | 0.99 | 5.70  |
| 3.1  | DPPA4     | 52353966  | developmental pluripotency associated 4                            | Non-cytosolic | 1  | 0.95 | 0.78 | 1.12  | 0.96 | 0.78 | 1.12  |
| 3.1  | BZW1      | 113414197 | PREDICTED: similar to basic leucine zipper and W2 domains 1        | Non-cytosolic | 1  | 0.49 | 0.35 | 1.56  | 0.39 | 0.34 | 1.66  |
| 3.08 | HSPE1     | 4504523   | heat shock 10kDa protein 1 (chaperonin 10)                         | Non-cytosolic | 1  | 0.39 | 0.34 | 1.45  | 0.39 | 0.36 | 1.45  |
| 3.06 | KIAA0564  | 57863271  | hypothetical protein LOC23078 isoform a                            | Non-cytosolic | 1  | 0.77 | 0.63 | 2.11  | 0.91 | 0.86 | 2.09  |
| 3.04 | RPN2      | 35493916  | ribophorin II                                                      | Non-cytosolic | 1  | 0.89 | 0.97 | 2.42  | 0.86 | 0.68 | 2.03  |
| 3    | GRPEL1    | 24308295  | GrpE-like 1, mitochondrial                                         | Non-cytosolic | 1  | 0.95 | 0.92 | 2.09  | 0.91 | 0.86 | 2.09  |
| 2.98 | LOC653147 | 89034466  | PREDICTED: similar to 60S ribosomal protein L26-like 1             | Non-cytosolic | 3  | 1.27 | 0.61 | 1.38  | 1.32 | 0.60 | 1.38  |
| 2.97 | ATP5L     | 51479156  | ATP synthase, H+ transporting, mitochondrial F0 complex, subunit G | Non-cytosolic | 1  | 0.90 | 0.82 | 1.18  | 0.95 | 0.92 | 1.27  |
| 2.96 | TOP1      | 11225260  | DNA topoisomerase I                                                | Non-cytosolic | 1  | 1.01 | 0.97 | 1.74  | 1.10 | 0.54 | 1.61  |
| 2.95 | C14orf166 | 7706322   | homeobox prox 1                                                    | Non-cytosolic | 1  | 1.10 | 0.59 | 2.91  | 1.24 | 0.37 | 2.09  |
| 2.94 | SR140     | 122937227 | U2-associated SR140 protein                                        | Non-cytosolic | 1  | 1.84 | 0.38 | 1.75  | 2.23 | 0.32 | 1.66  |
| 2.92 | C21orf33  | 5031691   | es1 protein isoform la                                             | Non-cytosolic | 1  | 0.86 | 0.85 | 2.09  | 0.94 | 0.86 | 2.21  |
| 2.92 | TXNDC12   | 7705696   | endoplasmic reticulum thioredoxin superfamily member, 18 kDa       | Non-cytosolic | 1  | 0.79 | 0.65 | 2.17  | 0.75 | 0.61 | 2.09  |
| 2.91 | HMG81     | 4504425   | high-mobility group box 1                                          | Non-cytosolic | 1  | 0.54 | 0.37 | 2.09  | 0.53 | 0.35 | 2.09  |
| 2.91 | HSPA1A    | 5123454   | heat shock 70kDa protein 1A                                        | Non-cytosolic | 2  | 1.01 | 0.94 | 1.85  | 1.12 | 0.86 | 1.45  |
| 2.89 | HIST3H2BB | 28173554  | histone H2B                                                        | Non-cytosolic | 19 | 0.47 | 0.42 | 1.39  | 0.47 | 0.43 | 1.38  |
| 2.89 | THOC4     | 55770864  | THO complex 4                                                      | Non-cytosolic | 1  | 0.87 | 0.97 | 1.32  | 0.86 | 0.93 | 1.39  |
| 2.89 | COX2      | 58615666  | cytochrome c oxidase subunit II                                    | Non-cytosolic | 1  | 1.05 | 0.91 | 2.15  | 0.99 | 1.00 | 3.66  |
| 2.89 | TRIM71    | 84993742  | abnormal cell LINEage LIN-41                                       | Non-cytosolic | 1  | 1.01 | 0.97 | 2.17  | 1.06 | 0.89 | 2.27  |
| 2.86 | SF3B5     | 13775200  | SF3b10                                                             | Non-cytosolic | 1  | 0.92 | 0.89 | 1.25  | 1.00 | 0.95 | 1.25  |
| 2.85 | EIF3E     | 4503521   | eukaryotic translation initiation factor 3, subunit 6 48kDa        | Non-cytosolic | 1  | 0.99 | 0.97 | 2.09  | 1.08 | 0.54 | 2.09  |
| 2.85 | CNN2      | 4758018   | calponin 2 isoform a                                               | Non-cytosolic | 1  | 0.65 | 0.48 | 2.11  | 0.58 | 0.41 | 2.11  |
| 2.85 | TMEM33    | 8922491   | transmembrane protein 33                                           | Non-cytosolic | 1  | 1.06 | 0.81 | 1.25  | 0.92 | 0.86 | 1.25  |
| 2.82 | ALDH3A2   | 73466520  | aldehyde dehydrogenase 3A2 isoform 1                               | Non-cytosolic | 1  | 1.75 | 0.64 | 1.36  | 1.53 | 0.68 | 1.39  |
| 2.79 | NOP2      | 76150625  | nucleolar protein 1, 120kDa                                        | Non-cytosolic | 1  | 0.70 | 0.34 | 1.38  | 0.74 | 0.35 | 1.38  |
| 2.77 | CAPZA1    | 5453597   | F-actin capping protein alpha-1 subunit                            | Non-cytosolic | 1  | 1.34 | 0.58 | 2.09  | 1.36 | 0.57 | 2.09  |
| 2.77 | AP2A1     | 19913416  | adaptor-related protein complex 2, alpha 1 subunit isoform 2       | Non-cytosolic | 2  | 1.22 | 0.44 | 1.38  | 1.16 | 0.71 | 1.79  |
| 2.77 | MRPL4     | 22547138  | mitochondrial ribosomal protein L4 isoform a                       | Non-cytosolic | 1  | 1.24 | 0.55 | 1.21  | 0.98 | 0.91 | 1.50  |
| 2.74 | MARCKSL1  | 13491174  | MARCKS-like 1                                                      | Non-cytosolic | 1  | 0.60 | 0.23 | 1.38  | 0.55 | 0.19 | 1.38  |
| 2.73 | PCBP2     | 14141168  | poly(rC)-binding protein 2 isoform a                               | Non-cytosolic | 1  | 0.74 | 0.58 | 2.83  | 0.79 | 0.64 | 4.21  |
| 2.72 | MTHFD1L   | 36796743  | methylenetetrahydrofolate dehydrogenase (NADP+ dependent) 1-like   | Non-cytosolic | 2  | 3.16 | 0.21 | 2.11  | 3.10 | 0.21 | 2.11  |
| 2.7  | RPS23     | 4506701   | ribosomal protein S23                                              | Non-cytosolic | 1  | 1.00 | 0.98 | 3.02  | 0.97 | 0.95 | 2.09  |
| 2.68 | ATP6V1B2  | 19913428  | vacuolar H+ATPase B2                                               | Non-cytosolic | 1  | 0.97 | 0.96 | 2.09  | 0.97 | 0.97 | 3.44  |
| 2.66 | ARVCF     | 4502247   | armadillo repeat protein                                           | Non-cytosolic | 1  | 2.27 | 0.18 | 3.70  | 2.36 | 0.18 | 2.11  |
| 2.66 | RALA      | 33946329  | ras related v-ral simian leukemia viral oncogene homolog A         | Non-cytosolic | 1  | 0.82 | 0.43 | 1.25  | 0.74 | 0.29 | 1.25  |
| 2.64 | CHD1L     | 42734377  | chromodomain helicase DNA binding protein 1-like                   | Non-cytosolic | 1  | 0.83 | 0.73 | 2.09  | 0.87 | 0.73 | 8.24  |
| 2.64 | YARS2     | 94681057  | tyrosyl-tRNA synthetase 2 (mitochondrial)                          | Non-cytosolic | 1  | 0.81 | 0.39 | 1.54  | 0.83 | 0.40 | 1.74  |
| 2.61 | MSH2      | 4557761   | mutS homolog 2                                                     | Non-cytosolic | 1  | 1.25 | 0.25 | 2.21  | 1.22 | 0.27 | 2.42  |
| 2.6  | KARS      | 5031815   | lysyl-tRNA synthetase                                              | Non-cytosolic | 1  | 0.95 | 0.94 | 2.09  | 1.09 | 0.86 | 2.09  |
| 2.6  | DDX10     | 13514831  | DEAD (Asp-Glu-Ala-Asp) box polypeptide 10                          | Non-cytosolic | 1  | 1.07 | 0.80 | 8.63  | 1.13 | 0.67 | 6.73  |
| 2.59 | ACIN1     | 7662238   | apoptotic chromatin condensation inducer 1                         | Non-cytosolic | 1  | 0.72 | 0.56 | 2.09  | 0.79 | 0.66 | 2.65  |
| 2.59 | CEBPZ     | 42542392  | CCAAT/enhancer binding protein zeta                                | Non-cytosolic | 1  | 0.71 | 0.55 | 2.09  | 0.76 | 0.62 | 2.09  |
| 2.58 | RPL28     | 13904866  | ribosomal protein L28                                              | Non-cytosolic | 1  | 1.15 | 0.75 | 2.09  | 1.12 | 0.80 | 2.11  |
| 2.57 | PGAM5     | 20070384  | Bcl-XL-binding protein v68                                         | Non-cytosolic | 1  | 1.03 | 0.92 | 19.23 | 1.08 | 0.84 | 19.59 |
| 2.55 | VDAC3     | 25188179  | voltage-dependent anion channel 3                                  | Non-cytosolic | 2  | 0.63 | 0.46 | 1.25  | 0.67 | 0.48 | 1.25  |
| 2.53 | NUP214    | 33946327  | nucleoporin 214kDa                                                 | Non-cytosolic | 1  | 1.33 | 0.59 | 2.09  | 1.16 | 0.76 | 2.09  |
| 2.53 | AHCTF1    | 113412739 | PREDICTED: similar to transcription factor ELYS                    | Non-cytosolic | 1  | 1.07 | 0.88 | 2.09  | 0.98 | 0.99 | 2.09  |
| 2.52 | NCKAP1    | 7305303   | NCK-associated protein 1 isoform 1                                 | Non-cytosolic | 1  | 1.85 | 0.11 | 2.09  | 1.87 | 0.11 | 2.11  |

|      |           |           |                                                                                        |               |   |       |      |      |       |      |      |
|------|-----------|-----------|----------------------------------------------------------------------------------------|---------------|---|-------|------|------|-------|------|------|
| 2.47 | EMG1      | 31652262  | C2f protein                                                                            | Non-cytosolic | 1 | 0.76  | 0.62 | 2.09 | 1.02  | 0.96 | 2.09 |
| 2.46 | CYB5A     | 4503183   | cytochrome b-5 isoform 2                                                               | Non-cytosolic | 1 | 1.09  | 0.97 | 2.03 | 1.13  | 0.83 | 1.47 |
| 2.46 | MK167     | 103472005 | antigen identified by monoclonal antibody Ki-67                                        | Non-cytosolic | 1 | 1.22  | 0.69 | 2.09 | 1.42  | 0.53 | 2.11 |
| 2.43 | LRPAP1    | 4505021   | low density lipoprotein receptor-related protein associated protein 1                  | Non-cytosolic | 1 | 0.85  | 0.71 | 1.38 | 0.90  | 0.76 | 1.38 |
| 2.42 | ATP6AP1   | 17136148  | ATPase, H+ transporting, lysosomal accessory protein 1                                 | Non-cytosolic | 1 | 1.16  | 0.75 | 2.09 | 1.13  | 0.79 | 2.09 |
| 2.4  | APP       | 4502167   | amyloid beta A4 protein , isoform a                                                    | Non-cytosolic | 1 | 0.63  | 0.45 | 2.09 | 0.77  | 0.63 | 2.11 |
| 2.4  | RPL18     | 4506607   | ribosomal protein L18                                                                  | Non-cytosolic | 1 | 1.20  | 0.65 | 2.09 | 1.17  | 0.69 | 2.09 |
| 2.39 | ITGA6     | 119395740 | integrin alpha chain, alpha 6 isoform a                                                | Non-cytosolic | 1 | 0.91  | 0.69 | 2.09 | 0.94  | 0.80 | 2.09 |
| 2.38 | GCS1      | 5453662   | mannosyl-oligosaccharide glucosidase                                                   | Non-cytosolic | 1 | 0.79  | 0.72 | 1.22 | 0.76  | 0.68 | 1.18 |
| 2.38 | RPS29     | 71772583  | ribosomal protein S29 isoform 2                                                        | Non-cytosolic | 1 | 1.13  | 0.72 | 3.66 | 1.03  | 0.91 | 6.49 |
| 2.37 | POLDIP2   | 7661672   | DNA polymerase delta interacting protein 2                                             | Non-cytosolic | 1 | 1.36  | 0.57 | 2.09 | 0.94  | 0.91 | 2.09 |
| 2.37 | COPG      | 11559929  | coatamer protein complex, subunit gamma 1                                              | Non-cytosolic | 1 | 1.74  | 0.38 | 2.11 | 1.46  | 0.49 | 2.09 |
| 2.36 | VAPA      | 94721250  | vesicle-associated membrane protein-associated protein A isoform 1                     | Non-cytosolic | 1 | 1.10  | 0.85 | 2.11 | 0.95  | 0.94 | 2.09 |
| 2.35 | SCP2      | 19923233  | sterol carrier protein 2 isoform 1 proprotein                                          | Non-cytosolic | 1 | 0.95  | 0.32 | 2.09 | 0.98  | 0.80 | 2.09 |
| 2.33 | PSMC2     | 4506209   | proteasome 26S ATPase subunit 2                                                        | Non-cytosolic | 1 | 1.04  | 0.79 | 1.38 | 1.00  | 0.99 | 1.38 |
| 2.33 | TAF15     | 4507353   | TBP-associated factor 15 isoform 2                                                     | Non-cytosolic | 1 | 0.66  | 0.48 | 2.09 | 0.64  | 0.46 | 2.09 |
| 2.33 | CLPB      | 13540606  | suppressor of potassium transport defect 3                                             | Non-cytosolic | 1 | 1.33  | 0.59 | 2.11 | 1.13  | 0.80 | 2.11 |
| 2.33 | MARK3     | 46852166  | MAP/microtubule affinity-regulating kinase 3                                           | Non-cytosolic | 1 | 1.07  | 0.88 | 2.09 | 1.10  | 0.84 | 2.09 |
| 2.31 | LOC731061 | 113414089 | PREDICTED: similar to Eukaryotic translation initiation factor 2 subunit 2             | Non-cytosolic | 1 | 1.17  | 0.60 | 2.09 | 1.15  | 0.62 | 2.09 |
| 2.31 | LOC732337 | 113415088 | PREDICTED: hypothetical protein                                                        | Non-cytosolic | 1 | 1.06  | 0.89 | 2.09 | 0.82  | 0.73 | 2.11 |
| 2.3  | ATP6V1A   | 19913424  | ATPase, H+ transporting, lysosomal 70kD, V1 subunit A, isoform 1                       | Non-cytosolic | 1 | 1.15  | 0.77 | 2.09 | 0.98  | 0.98 | 2.09 |
| 2.28 | RALY      | 21396480  | RNA binding protein (autoantigenic, hnRNP-associated with lethal yellow) short isoform | Non-cytosolic | 0 | 0.85  | 0.70 | 2.09 | 0.70  | 0.47 | 2.09 |
| 2.28 | KRT19     | 24234699  | keratin 19                                                                             | Non-cytosolic | 3 | 2.01  | 0.31 | 2.11 | 2.11  | 0.28 | 2.11 |
| 2.27 | RPL19     | 4506609   | ribosomal protein L19                                                                  | Non-cytosolic | 1 | 1.02  | 0.96 | 2.09 | 1.05  | 0.91 | 2.09 |
| 2.27 | VRK1      | 4507903   | vaccinia related kinase 1                                                              | Non-cytosolic | 1 | 1.09  | 0.59 | 2.09 | 1.12  | 0.50 | 2.09 |
| 2.27 | NAT10     | 13399322  | N-acetyltransferase-like protein                                                       | Non-cytosolic | 1 | 1.09  | 0.85 | 2.09 | 1.08  | 0.87 | 2.09 |
| 2.26 | NDUFA9    | 6681764   | NADH dehydrogenase (ubiquinone) 1 alpha subcomplex, 9, 39kDa                           | Non-cytosolic | 1 | 0.91  | 0.90 | 1.38 | 0.99  | 0.96 | 1.38 |
| 2.26 | SLCA4A2   | 21361551  | solute carrier family 4, anion exchanger, member 2                                     | Non-cytosolic | 1 | 0.96  | 0.89 | 7.24 | 0.95  | 0.90 | 2.09 |
| 2.25 | AIFM1     | 4757732   | programmed cell death 8 isoform 1                                                      | Non-cytosolic | 1 | 1.08  | 0.87 | 2.09 | 0.83  | 0.73 | 2.09 |
| 2.24 | AQR       | 38788372  | aquarius                                                                               | Non-cytosolic | 1 | 0.70  | 0.33 | 1.38 | 0.82  | 0.49 | 2.44 |
| 2.24 | CUGBP1    | 71164871  | CUG triplet repeat, RNA-binding protein 1 isoform 3                                    | Non-cytosolic | 1 | 0.93  | 0.89 | 2.09 | 1.05  | 0.91 | 2.09 |
| 2.24 | UNC84A    | 110227866 | unc-84 homolog A                                                                       | Non-cytosolic | 1 | 0.89  | 0.64 | 2.09 | 0.94  | 0.81 | 2.09 |
| 2.23 | QSCN6L1   | 55770904  | quiescin Q6-like 1                                                                     | Non-cytosolic | 1 | 0.94  | 0.90 | 2.09 | 0.96  | 0.95 | 2.09 |
| 2.22 | SART1     | 10863889  | squamous cell carcinoma antigen recognized by T cells 1                                | Non-cytosolic | 1 | 0.82  | 0.70 | 2.11 | 0.80  | 0.68 | 2.09 |
| 2.22 | HNRNPH3   | 14141159  | heterogeneous nuclear ribonucleoprotein H3 isoform b                                   | Non-cytosolic | 2 | 1.00  | 1.00 | 1.15 | 0.97  | 0.77 | 1.15 |
| 2.22 | PPP1CA    | 56790945  | protein phosphatase 1, catalytic subunit, alpha isoform 3                              | Non-cytosolic | 1 | 0.91  | 0.65 | 1.41 | 0.90  | 0.64 | 1.28 |
| 2.2  | LONP1     | 21396489  | mitochondrial lon peptidase 1                                                          | Non-cytosolic | 1 | 0.75  | 0.61 | 2.09 | 0.80  | 0.69 | 2.11 |
| 2.2  | HUWE1     | 61676188  | HECT, UBA and WWE domain containing 1                                                  | Non-cytosolic | 1 | 1.24  | 0.68 | 2.09 | 1.27  | 0.64 | 2.09 |
| 2.2  | EPRS      | 62241042  | glutamyl-prolyl tRNA synthetase                                                        | Non-cytosolic | 1 | 1.27  | 0.64 | 2.09 | 1.20  | 0.71 | 2.09 |
| 2.2  | BAT2D1    | 115298682 | HBxAg transactivated protein 2                                                         | Non-cytosolic | 1 | 1.04  | 0.97 | 1.33 | 1.02  | 0.99 | 1.38 |
| 2.19 | 11-Sep    | 8922712   | septin 11                                                                              | Non-cytosolic | 1 | 0.49  | 0.32 | 2.11 | 0.49  | 0.33 | 2.65 |
| 2.19 | AP1G1     | 71773010  | adaptor-related protein complex 1, gamma 1 subunit isoform a                           | Non-cytosolic | 1 | 1.02  | 0.87 | 1.56 | 0.98  | 0.92 | 1.53 |
| 2.17 | SNRPD1    | 5902102   | small nuclear ribonucleoprotein D1 polypeptide 16kDa                                   | Non-cytosolic | 1 | 1.03  | 0.92 | 2.09 | 1.02  | 0.90 | 4.70 |
| 2.17 | KIF16B    | 41327691  | kinesin-like motor protein C20orf23                                                    | Non-cytosolic | 1 | 0.77  | 0.64 | 2.09 | 0.73  | 0.58 | 2.09 |
| 2.17 | TOMM70A   | 54607135  | translocase of outer mitochondrial membrane 70 homolog A                               | Non-cytosolic | 1 | 0.98  | 0.98 | 3.22 | 1.04  | 0.90 | 2.09 |
| 2.17 | CSDE1     | 56117852  | upstream of NRAS isoform 1                                                             | Non-cytosolic | 1 | 0.91  | 0.63 | 2.09 | 0.83  | 0.37 | 2.09 |
| 2.17 | LOC653877 | 89036565  | PREDICTED: similar to Small subunit processome component 20 homolog                    | Non-cytosolic | 1 | 1.49  | 0.49 | 2.09 | 1.05  | 0.90 | 2.09 |
| 2.16 | PPP1R12A  | 4505317   | protein phosphatase 1, regulatory (inhibitor) subunit 12A                              | Non-cytosolic | 1 | 0.83  | 0.74 | 2.11 | 1.00  | 0.99 | 2.09 |
| 2.16 | PDHA1     | 4505685   | pyruvate dehydrogenase (lipoamide) alpha 1                                             | Non-cytosolic | 1 | 1.41  | 0.46 | 2.09 | 1.31  | 0.53 | 2.09 |
| 2.16 | SMC3      | 4885399   | structural maintenance of chromosomes 3                                                | Non-cytosolic | 1 | 0.82  | 0.73 | 2.11 | 0.72  | 0.56 | 2.09 |
| 2.16 | PTRH2     | 7706351   | Bcl-2 inhibitor of transcription isoform b                                             | Non-cytosolic | 1 | 1.19  | 0.73 | 1.16 | 1.31  | 0.63 | 1.16 |
| 2.16 | SLC38A10  | 83921602  | hypothetical protein LOC124565 isoform a                                               | Non-cytosolic | 1 | 0.84  | 0.74 | 2.09 | 0.98  | 0.98 | 2.09 |
| 2.16 | MTA1      | 115527080 | metastasis associated protein                                                          | Non-cytosolic | 1 | 0.76  | 0.62 | 2.09 | 0.69  | 0.52 | 2.44 |
| 2.15 | HNRNPF    | 4826760   | heterogeneous nuclear ribonucleoprotein F                                              | Non-cytosolic | 4 | 1.28  | 0.44 | 1.19 | 1.20  | 0.51 | 1.26 |
| 2.15 | UBTF      | 7657671   | upstream binding transcription factor, RNA polymerase I isoform a                      | Non-cytosolic | 1 | 0.74  | 0.56 | 2.09 | 0.79  | 0.68 | 2.09 |
| 2.15 | RTN4      | 24431935  | reticulon 4 isoform A                                                                  | Non-cytosolic | 1 | 1.36  | 0.57 | 2.09 | 1.43  | 0.52 | 2.09 |
| 2.15 | TCOF1     | 57164977  | Treacher Collins-Franceschetti syndrome 1 isoform a                                    | Non-cytosolic | 1 | 1.14  | 0.66 | 1.63 | 1.32  | 0.64 | 1.51 |
| 2.15 | UTF1      | 71043876  | undifferentiated embryonic cell transcription factor 1                                 | Non-cytosolic | 1 | 12.02 | 0.17 | 2.56 | 11.80 | 0.17 | 2.36 |
| 2.14 | EIF4G2    | 4503539   | eukaryotic translation initiation factor 4 gamma, 2 isoform 1                          | Non-cytosolic | 1 | 0.98  | 0.91 | 1.32 | 0.93  | 0.89 | 1.28 |
| 2.14 | WBP11     | 7706501   | WW domain binding protein 11                                                           | Non-cytosolic | 1 | 0.89  | 0.95 | 1.36 | 0.91  | 0.88 | 1.45 |
| 2.14 | KIAA0090  | 22095331  | hypothetical protein LOC23065                                                          | Non-cytosolic | 1 | 1.22  | 0.69 | 2.11 | 0.99  | 0.98 | 2.09 |

|      |           |           |                                                                                |               |   |      |      |      |      |      |      |
|------|-----------|-----------|--------------------------------------------------------------------------------|---------------|---|------|------|------|------|------|------|
| 2.14 | MLLT4     | 90819237  | myeloid/lymphoid or mixed-lineage leukemia ; translocated to, 4 isoform 1      | Non-cytosolic | 1 | 0.45 | 0.12 | 1.56 | 0.81 | 0.32 | 2.99 |
| 2.14 | HTT       | 90903231  | huntingtin                                                                     | Non-cytosolic | 1 | 1.14 | 0.79 | 2.09 | 1.37 | 0.56 | 2.09 |
| 2.13 | TPT1      | 4507669   | tumor protein, translationally-controlled 1                                    | Non-cytosolic | 1 | 1.03 | 0.96 | 1.53 | 0.96 | 0.68 | 1.58 |
| 2.13 | YWHAE     | 5803225   | tyrosine 3/tryptophan 5 -monooxygenase activation protein, epsilon polypeptide | Non-cytosolic | 1 | 1.00 | 0.94 | 1.37 | 0.98 | 0.88 | 1.25 |
| 2.13 | MTCH1     | 7657345   | mitochondrial carrier homolog 1                                                | Non-cytosolic | 1 | 0.91 | 0.78 | 1.38 | 0.93 | 0.79 | 1.38 |
| 2.13 | CP5F3     | 7706427   | cleavage and polyadenylation specific factor 3, 73kDa                          | Non-cytosolic | 1 | 1.05 | 0.91 | 2.09 | 1.07 | 0.88 | 2.09 |
| 2.12 | SYNJ2BP   | 8922964   | synaptojanin 2 binding protein                                                 | Non-cytosolic | 1 | 1.15 | 0.77 | 2.09 | 1.13 | 0.80 | 2.09 |
| 2.12 | NOL6      | 18644728  | nucleolar protein family 6 alpha isoform                                       | Non-cytosolic | 1 | 0.95 | 0.94 | 2.09 | 0.90 | 0.82 | 2.09 |
| 2.11 | HLTF      | 21071054  | helicase-like transcription factor                                             | Non-cytosolic | 1 | 0.67 | 0.47 | 4.37 | 0.74 | 0.59 | 2.09 |
| 2.11 | TARS      | 38202255  | threonyl-tRNA synthetase                                                       | Non-cytosolic | 1 | 1.07 | 0.83 | 2.09 | 1.17 | 0.66 | 2.09 |
| 2.11 | ACACA     | 38679960  | acetyl-Coenzyme A carboxylase alpha isoform 1                                  | Non-cytosolic | 1 | 1.15 | 0.77 | 2.09 | 0.74 | 0.59 | 2.11 |
| 2.11 | MTA3      | 50838795  | metastasis associated 1 family, member 3                                       | Non-cytosolic | 1 | 0.77 | 0.60 | 4.53 | 0.72 | 0.56 | 2.09 |
| 2.11 | EIF3B     | 83367072  | eukaryotic translation initiation factor 3, subunit 9 eta, 116kDa              | Non-cytosolic | 1 | 1.14 | 0.82 | 2.47 | 1.17 | 0.79 | 6.67 |
| 2.11 | SLC16A1   | 115583685 | solute carrier family 16, member 1                                             | Non-cytosolic | 1 | 0.72 | 0.70 | 1.21 | 0.63 | 0.61 | 1.26 |
| 2.1  | CTSC      | 4503141   | cathepsin C isoform a preproprotein                                            | Non-cytosolic | 1 | 0.57 | 0.25 | 2.96 | 0.61 | 0.29 | 2.09 |
| 2.1  | SLC29A1   | 4826716   | equilibrative nucleoside transporter 1                                         | Non-cytosolic | 1 | 0.93 | 0.97 | 9.29 | 0.90 | 0.85 | 2.09 |
| 2.1  | NDUFA8    | 7657369   | NADH dehydrogenase (ubiquinone) 1 alpha subcomplex, 8, 19kDa                   | Non-cytosolic | 1 | 0.81 | 0.69 | 2.09 | 0.79 | 0.66 | 2.31 |
| 2.1  | HMG5      | 13540523  | nucleosomal binding protein 1                                                  | Non-cytosolic | 1 | 0.96 | 0.96 | 2.09 | 0.92 | 0.89 | 2.09 |
| 2.1  | C14orf156 | 13654278  | SRA stem-loop-interacting RNA-binding protein                                  | Non-cytosolic | 1 | 0.70 | 0.55 | 1.38 | 0.75 | 0.60 | 1.38 |
| 2.1  | UPF2      | 18375676  | UPF2 regulator of nonsense transcripts homolog                                 | Non-cytosolic | 1 | 1.14 | 0.78 | 2.09 | 1.49 | 0.49 | 2.09 |
| 2.1  | SMARCA4   | 21071056  | SWI/SNF-related matrix-associated actin-dependent regulator of chromatin a4    | Non-cytosolic | 1 | 0.76 | 0.57 | 2.09 | 0.77 | 0.62 | 2.09 |
| 2.1  | AKAP12    | 21493024  | A-kinase anchor protein 12 isoform 2                                           | Non-cytosolic | 1 | 3.02 | 0.21 | 2.09 | 3.19 | 0.21 | 2.19 |
| 2.1  | LAMC3     | 110611156 | laminin, gamma 3                                                               | Non-cytosolic | 1 | 1.84 | 0.36 | 2.09 | 1.91 | 0.34 | 2.09 |
| 2.09 | MRPL16    | 8923448   | mitochondrial ribosomal protein L16                                            | Non-cytosolic | 1 | 0.82 | 0.71 | 2.09 | 1.05 | 0.90 | 2.09 |
| 2.09 | ITGB1     | 19743821  | integrin beta 1 isoform 1C-2                                                   | Non-cytosolic | 1 | 1.08 | 0.67 | 1.25 | 1.13 | 0.56 | 1.25 |
| 2.09 | HNRNPUL1  | 21536326  | E1B-55kDa-associated protein 5 isoform a                                       | Non-cytosolic | 1 | 1.41 | 0.54 | 2.11 | 1.28 | 0.63 | 2.09 |
| 2.09 | CAPN5     | 37577157  | calpain 5                                                                      | Non-cytosolic | 1 | 1.27 | 0.64 | 2.11 | 1.12 | 0.81 | 2.09 |
| 2.09 | IGFBP2    | 55925576  | insulin-like growth factor binding protein 2, 36kDa                            | Non-cytosolic | 1 | 0.71 | 0.57 | 2.68 | 0.71 | 0.55 | 2.09 |
| 2.08 | FEN1      | 4758356   | flap structure-specific endonuclease 1                                         | Non-cytosolic | 1 | 0.73 | 0.58 | 2.09 | 0.72 | 0.57 | 2.09 |
| 2.08 | KIF23     | 6754472   | kinesin family member 23 isoform 2                                             | Non-cytosolic | 1 | 0.95 | 0.98 | 1.22 | 1.02 | 0.89 | 1.19 |
| 2.08 | MCM6      | 7427519   | minichromosome maintenance deficient 6                                         | Non-cytosolic | 1 | 0.93 | 0.90 | 1.38 | 1.03 | 0.96 | 1.38 |
| 2.08 | MTA2      | 14141170  | metastasis-associated protein 2                                                | Non-cytosolic | 1 | 1.07 | 0.88 | 1.38 | 1.12 | 0.80 | 1.38 |
| 2.08 | SUZ12     | 15149470  | joined to JAZF1                                                                | Non-cytosolic | 1 | 0.77 | 0.64 | 2.09 | 0.87 | 0.81 | 2.33 |
| 2.08 | SLCA47    | 19923176  | solute carrier family 4, sodium bicarbonate cotransporter, member 7            | Non-cytosolic | 1 | 1.04 | 0.77 | 1.89 | 1.05 | 0.79 | 1.57 |
| 2.08 | UTP14A    | 21361348  | UTP14, U3 small nucleolar ribonucleoprotein, homolog A                         | Non-cytosolic | 1 | 1.18 | 0.71 | 2.09 | 1.20 | 0.70 | 2.09 |
| 2.08 | PHF8      | 32698700  | PHD finger protein 8                                                           | Non-cytosolic | 1 | 1.02 | 0.96 | 2.09 | 1.11 | 0.83 | 2.09 |
| 2.08 | ADSS      | 34577063  | adenylosuccinate synthase                                                      | Non-cytosolic | 1 | 1.34 | 0.58 | 2.09 | 1.46 | 0.51 | 2.11 |
| 2.08 | GPS1      | 47078240  | G protein pathway suppressor 1 isoform 2                                       | Non-cytosolic | 1 | 0.91 | 0.85 | 2.40 | 0.99 | 0.97 | 3.94 |
| 2.08 | SQLE      | 62865635  | squalene monooxygenase                                                         | Non-cytosolic | 1 | 0.95 | 0.93 | 2.09 | 1.16 | 0.76 | 2.11 |
| 2.07 | PSMB1     | 4506193   | proteasome beta 1 subunit                                                      | Non-cytosolic | 1 | 1.36 | 0.46 | 1.38 | 1.22 | 0.55 | 1.38 |
| 2.07 | RAB2A     | 4506365   | RAB2, member RAS oncogene family                                               | Non-cytosolic | 1 | 0.93 | 0.90 | 2.09 | 1.07 | 0.88 | 2.09 |
| 2.07 | ARPC2     | 5031599   | actin related protein 2/3 complex subunit 2                                    | Non-cytosolic | 1 | 0.99 | 0.96 | 1.53 | 0.93 | 0.87 | 1.72 |
| 2.07 | ABCC1     | 9955960   | ATP-binding cassette, sub-family C, member 1 isoform 7                         | Non-cytosolic | 1 | 1.09 | 0.85 | 2.09 | 0.69 | 0.53 | 2.11 |
| 2.07 | MARS      | 14043022  | methionine-tRNA synthetase                                                     | Non-cytosolic | 1 | 1.05 | 0.90 | 2.09 | 1.39 | 0.54 | 2.09 |
| 2.07 | TPM3      | 24119203  | tropomyosin 3 isoform 2                                                        | Non-cytosolic | 1 | 0.60 | 0.42 | 2.09 | 0.62 | 0.44 | 2.09 |
| 2.07 | IDH1      | 28178825  | isocitrate dehydrogenase 1 (NADP+), soluble                                    | Non-cytosolic | 1 | 2.01 | 0.35 | 2.09 | 2.09 | 0.32 | 2.33 |
| 2.07 | BRX1      | 55770900  | BRX1                                                                           | Non-cytosolic | 1 | 0.75 | 0.63 | 2.09 | 0.90 | 0.83 | 2.09 |
| 2.07 | RBPM5     | 57164971  | RNA-binding protein with multiple splicing isoform B                           | Non-cytosolic | 1 | 1.02 | 0.97 | 2.88 | 1.04 | 0.93 | 2.09 |
| 2.07 | P4HA1     | 63252888  | prolyl 4-hydroxylase, alpha 1 subunit isoform 2                                | Non-cytosolic | 1 | 0.80 | 0.68 | 2.09 | 0.84 | 0.75 | 2.09 |
| 2.07 | POLR1A    | 103471997 | polymerase (RNA) I polypeptide A, 194kDa                                       | Non-cytosolic | 1 | 0.84 | 0.72 | 1.38 | 0.69 | 0.51 | 1.38 |
| 2.06 | SFRS3     | 4506901   | splicing factor, arginine/serine-rich 3                                        | Non-cytosolic | 1 | 0.39 | 0.26 | 2.11 | 0.41 | 0.27 | 2.11 |
| 2.06 | UMPS      | 4507835   | uridine monophosphate synthase                                                 | Non-cytosolic | 1 | 1.02 | 0.96 | 2.09 | 1.15 | 0.77 | 2.09 |
| 2.06 | TFB1M     | 7705785   | transcription factor B1, mitochondrial                                         | Non-cytosolic | 1 | 1.58 | 0.44 | 2.11 | 1.46 | 0.51 | 2.11 |
| 2.06 | RPS5      | 13904870  | ribosomal protein S5                                                           | Non-cytosolic | 1 | 1.67 | 0.70 | 1.34 | 1.57 | 0.77 | 1.26 |
| 2.06 | MRPS9     | 33188463  | mitochondrial ribosomal protein S9                                             | Non-cytosolic | 1 | 0.92 | 0.89 | 2.11 | 1.00 | 0.98 | 4.06 |
| 2.06 | SEC24C    | 38373671  | SEC24-related protein C                                                        | Non-cytosolic | 1 | 1.12 | 0.81 | 2.09 | 1.19 | 0.72 | 2.09 |
| 2.06 | NUP160    | 54859722  | nucleoporin 160kDa                                                             | Non-cytosolic | 1 | 1.03 | 0.74 | 1.18 | 1.06 | 0.76 | 1.18 |
| 2.06 | TRIP6     | 91208423  | thyroid receptor-interacting protein 6                                         | Non-cytosolic | 1 | 1.01 | 0.97 | 2.09 | 0.80 | 0.69 | 2.09 |
| 2.05 | POLR1C    | 4759046   | RNA polymerase I subunit isoform 2                                             | Non-cytosolic | 1 | 0.86 | 0.75 | 1.38 | 0.84 | 0.75 | 1.38 |
| 2.05 | THRAP3    | 4827040   | thyroid hormone receptor associated protein 3                                  | Non-cytosolic | 1 | 0.95 | 0.91 | 1.06 | 0.94 | 0.86 | 1.06 |
| 2.05 | MFN2      | 7662004   | mitofusin 2                                                                    | Non-cytosolic | 1 | 1.05 | 0.91 | 2.09 | 0.96 | 0.96 | 2.09 |

|      |          |           |                                                                  |               |   |      |      |       |      |      |      |
|------|----------|-----------|------------------------------------------------------------------|---------------|---|------|------|-------|------|------|------|
| 2.05 | RAB3GAP2 | 19923790  | rab3 GTPase-activating protein, non-catalytic subunit            | Non-cytosolic | 1 | 1.28 | 0.63 | 2.09  | 1.19 | 0.72 | 2.09 |
| 2.05 | DDX39    | 21040371  | DEAD (Asp-Glu-Ala-Asp) box polypeptide 39                        | Non-cytosolic | 3 | 0.75 | 0.61 | 2.09  | 0.90 | 0.84 | 2.09 |
| 2.05 | MPP6     | 21361598  | membrane protein, palmitoylated 6                                | Non-cytosolic | 1 | 0.83 | 0.74 | 2.11  | 0.76 | 0.62 | 2.09 |
| 2.05 | NDUFA13  | 21361822  | cell death-regulatory protein GRIM19                             | Non-cytosolic | 1 | 0.42 | 0.54 | 1.45  | 0.46 | 0.56 | 1.39 |
| 2.05 | CNOT1    | 42716275  | CCR4-NOT transcription complex, subunit 1 isoform a              | Non-cytosolic | 1 | 0.99 | 0.94 | 18.88 | 1.37 | 0.57 | 5.86 |
| 2.05 | FKBP8    | 52630440  | FK506-binding protein 8                                          | Non-cytosolic | 1 | 0.74 | 0.62 | 2.09  | 0.60 | 0.48 | 2.11 |
| 2.05 | KDM1A    | 58761546  | amine oxidase (flavin containing) domain 2 isoform b             | Non-cytosolic | 1 | 0.74 | 0.60 | 2.09  | 0.77 | 0.64 | 2.09 |
| 2.05 | SEH1L    | 61743971  | sec13-like protein isoform 1                                     | Non-cytosolic | 1 | 1.39 | 0.54 | 2.09  | 1.26 | 0.65 | 2.09 |
| 2.05 | DNAJC13  | 112421122 | Dnaj (Hsp40) homolog, subfamily C, member 13                     | Non-cytosolic | 1 | 1.08 | 0.87 | 2.09  | 0.98 | 0.99 | 2.09 |
| 2.04 | NDUFS4   | 4505369   | NADH dehydrogenase (ubiquinone) Fe-S protein 4, 18kDa            | Non-cytosolic | 1 | 0.89 | 0.69 | 2.44  | 1.01 | 0.94 | 1.64 |
| 2.04 | RANGAP1  | 4506411   | Ran GTPase activating protein 1                                  | Non-cytosolic | 1 | 1.04 | 0.92 | 2.21  | 1.17 | 0.74 | 2.25 |
| 2.04 | FLOT1    | 5031699   | flotillin 1                                                      | Non-cytosolic | 1 | 0.95 | 0.92 | 1.19  | 0.94 | 0.87 | 1.21 |
| 2.04 | IDH3A    | 5031777   | isocitrate dehydrogenase 3 (NAD+) alpha                          | Non-cytosolic | 1 | 1.19 | 0.69 | 2.68  | 1.26 | 0.64 | 2.09 |
| 2.04 | CRTAP    | 5453601   | cartilage associated protein                                     | Non-cytosolic | 1 | 0.65 | 0.46 | 2.11  | 0.67 | 0.47 | 2.11 |
| 2.04 | KIF2C    | 5803082   | kinesin family member 2C                                         | Non-cytosolic | 1 | 1.28 | 0.63 | 2.11  | 1.01 | 0.96 | 2.09 |
| 2.04 | STAT1    | 6274552   | signal transducer and activator of transcription 1 isoform alpha | Non-cytosolic | 1 | 0.90 | 0.84 | 2.09  | 0.95 | 0.94 | 2.09 |
| 2.04 | MAPRE1   | 6912494   | microtubule-associated protein, RP/EB family, member 1           | Non-cytosolic | 1 | 0.79 | 0.68 | 2.09  | 0.77 | 0.64 | 2.09 |
| 2.04 | MRPS5    | 13994259  | mitochondrial ribosomal protein S5                               | Non-cytosolic | 1 | 1.29 | 0.62 | 2.09  | 1.01 | 0.97 | 2.09 |
| 2.04 | ARHGEF2  | 15011974  | rho/rac guanine nucleotide exchange factor 2                     | Non-cytosolic | 1 | 0.56 | 0.38 | 2.09  | 0.74 | 0.58 | 2.09 |
| 2.04 | WHSC2    | 19913363  | Wolf-Hirschhorn syndrome candidate 2 protein                     | Non-cytosolic | 1 | 0.90 | 0.80 | 11.07 | 0.83 | 0.70 | 2.15 |
| 2.04 | NUCB1    | 20070228  | nucleobindin 1                                                   | Non-cytosolic | 1 | 0.75 | 0.61 | 2.11  | 0.82 | 0.71 | 2.09 |
| 2.04 | NDUFV1   | 20149568  | NADH dehydrogenase (ubiquinone) flavoprotein 1, 51kDa            | Non-cytosolic | 1 | 0.86 | 0.78 | 2.11  | 1.04 | 0.92 | 2.09 |
| 2.04 | STRBP    | 21361745  | spermatid perinuclear RNA-binding protein                        | Non-cytosolic | 3 | 0.90 | 0.84 | 2.09  | 0.85 | 0.76 | 2.11 |
| 2.04 | PIGT     | 23397653  | phosphatidylinositol glycan anchor biosynthesis, class T         | Non-cytosolic | 1 | 1.03 | 0.94 | 2.09  | 1.09 | 0.85 | 2.09 |
| 2.04 | IKBIP    | 24233517  | IKK interacting protein isoform 1                                | Non-cytosolic | 1 | 1.09 | 0.76 | 1.75  | 1.17 | 0.68 | 1.57 |
| 2.04 | NUP210   | 27477134  | nucleoporin 210                                                  | Non-cytosolic | 1 | 0.88 | 0.82 | 2.09  | 0.96 | 0.95 | 2.09 |
| 2.04 | ABCF2    | 27881506  | ATP-binding cassette, sub-family F, member 2 isoform a           | Non-cytosolic | 1 | 1.03 | 0.94 | 2.09  | 1.12 | 0.81 | 2.09 |
| 2.04 | CDK5RAP1 | 28872782  | CDK5 regulatory subunit associated protein 1 isoform a           | Non-cytosolic | 1 | 1.14 | 0.78 | 2.09  | 1.72 | 0.39 | 2.11 |
| 2.04 | MRPL47   | 29826287  | mitochondrial ribosomal protein L47 isoform a                    | Non-cytosolic | 1 | 0.83 | 0.69 | 1.17  | 0.88 | 0.78 | 1.13 |
| 2.04 | SEC23A   | 38202214  | SEC23-related protein A                                          | Non-cytosolic | 1 | 1.32 | 0.50 | 2.23  | 1.31 | 0.59 | 2.09 |
| 2.04 | GSPT2    | 46094014  | peptide chain release factor 3                                   | Non-cytosolic | 1 | 0.81 | 0.70 | 2.09  | 0.90 | 0.85 | 2.09 |
| 2.03 | POLR2B   | 4505941   | DNA directed RNA polymerase II polypeptide B                     | Non-cytosolic | 1 | 0.99 | 0.98 | 2.42  | 0.90 | 0.84 | 2.09 |
| 2.03 | RPLP1    | 4506669   | ribosomal protein P1 isoform 1                                   | Non-cytosolic | 1 | 1.16 | 0.76 | 2.09  | 1.21 | 0.70 | 2.09 |
| 2.03 | NDUFA5   | 4826848   | NADH dehydrogenase (ubiquinone) 1 alpha subcomplex, 5            | Non-cytosolic | 1 | 0.81 | 0.69 | 2.09  | 0.70 | 0.54 | 2.11 |
| 2.03 | MAT2A    | 5174529   | methionine adenosyltransferase II, alpha                         | Non-cytosolic | 1 | 1.24 | 0.67 | 2.09  | 1.24 | 0.67 | 2.09 |
| 2.03 | ERP29    | 5803013   | endoplasmic reticulum protein 29 isoform 1                       | Non-cytosolic | 1 | 0.96 | 0.99 | 1.42  | 0.95 | 0.99 | 1.53 |
| 2.03 | FEM1B    | 7657265   | fem-1 homolog b                                                  | Non-cytosolic | 1 | 0.74 | 0.72 | 1.19  | 0.77 | 0.74 | 1.17 |
| 2.03 | LIMA1    | 7705373   | epithelial protein lost in neoplasm beta                         | Non-cytosolic | 1 | 1.47 | 0.50 | 2.11  | 1.37 | 0.57 | 2.11 |
| 2.03 | TRMT112  | 7705477   | hypothetical protein LOC51504                                    | Non-cytosolic | 1 | 1.06 | 0.89 | 2.09  | 1.18 | 0.73 | 2.09 |
| 2.03 | PFKP     | 11321601  | phosphofructokinase, platelet                                    | Non-cytosolic | 1 | 1.42 | 0.53 | 2.11  | 1.72 | 0.39 | 2.11 |
| 2.03 | ATL2     | 11641303  | ADP-ribosylation factor-like 6 interacting protein 2             | Non-cytosolic | 1 | 0.95 | 0.94 | 2.09  | 0.79 | 0.67 | 2.09 |
| 2.03 | MRPS11   | 16554609  | mitochondrial ribosomal protein S11 isoform a                    | Non-cytosolic | 1 | 0.98 | 0.99 | 2.09  | 0.96 | 0.96 | 2.09 |
| 2.03 | HELLS    | 21914927  | helicase, lymphoid-specific                                      | Non-cytosolic | 1 | 1.10 | 0.83 | 2.09  | 1.12 | 0.81 | 2.09 |
| 2.03 | LEMD2    | 31044432  | LEM domain containing 2                                          | Non-cytosolic | 1 | 0.86 | 0.77 | 2.09  | 0.89 | 0.83 | 2.09 |
| 2.03 | MCM7     | 33469968  | minichromosome maintenance protein 7 isoform 1                   | Non-cytosolic | 1 | 1.21 | 0.71 | 1.38  | 1.50 | 0.48 | 1.38 |
| 2.03 | SAMHD1   | 38016914  | SAM domain- and HD domain-containing protein 1                   | Non-cytosolic | 1 | 0.93 | 0.90 | 1.38  | 1.01 | 0.95 | 1.38 |
| 2.03 | ELAVL1   | 38201714  | ELAV-like 1                                                      | Non-cytosolic | 1 | 0.43 | 0.51 | 1.45  | 0.45 | 0.57 | 1.42 |
| 2.03 | SKIV2L2  | 39930353  | superkiller viralicidic activity 2-like 2                        | Non-cytosolic | 1 | 1.01 | 1.00 | 1.38  | 1.03 | 0.89 | 1.38 |
| 2.03 | ZC3H14   | 40804742  | nuclear protein Ukp68 isoform 1                                  | Non-cytosolic | 1 | 0.66 | 0.49 | 2.09  | 0.78 | 0.65 | 2.11 |
| 2.03 | INT5     | 44771201  | integrator complex subunit 5                                     | Non-cytosolic | 1 | 0.86 | 0.72 | 2.09  | 0.95 | 0.91 | 2.09 |
| 2.03 | WARS     | 47419916  | tryptophanyl-tRNA synthetase isoform a                           | Non-cytosolic | 1 | 1.37 | 0.45 | 2.11  | 1.31 | 0.51 | 2.09 |
| 2.03 | DDX54    | 51094101  | DEAD (Asp-Glu-Ala-Asp) box polypeptide 54                        | Non-cytosolic | 1 | 0.91 | 0.86 | 2.09  | 1.02 | 0.97 | 2.09 |
| 2.03 | FAM98A   | 56699482  | hypothetical protein LOC25940                                    | Non-cytosolic | 1 | 1.45 | 0.48 | 1.38  | 1.61 | 0.43 | 1.38 |
| 2.03 | PIPOX    | 60499001  | L-pipecolic acid oxidase                                         | Non-cytosolic | 1 | 0.50 | 0.45 | 1.36  | 0.44 | 0.42 | 1.41 |
| 2.03 | UQCRH    | 83627705  | ubiquinol-cytochrome c reductase hinge protein                   | Non-cytosolic | 1 | 1.02 | 0.95 | 1.24  | 1.00 | 0.97 | 1.21 |
| 2.03 | MYO6     | 92859701  | myosin VI                                                        | Non-cytosolic | 1 | 0.95 | 0.94 | 2.09  | 1.01 | 0.98 | 2.09 |
| 2.03 | RPL22L1  | 113415381 | PREDICTED: similar to ribosomal protein L22 like 1               | Non-cytosolic | 1 | 0.58 | 0.40 | 2.09  | 0.53 | 0.36 | 2.09 |
| 2.03 | USP10    | 119220605 | ubiquitin specific protease 10                                   | Non-cytosolic | 1 | 1.31 | 0.62 | 2.42  | 1.36 | 0.55 | 2.11 |
| 2.02 | CXADR    | 4503173   | coxsackie virus and adenovirus receptor                          | Non-cytosolic | 1 | 0.74 | 0.59 | 2.11  | 0.67 | 0.51 | 2.11 |
| 2.02 | RFC3     | 4506489   | replication factor C 3 isoform 1                                 | Non-cytosolic | 1 | 0.99 | 0.99 | 2.09  | 1.06 | 0.90 | 2.09 |
| 2.02 | ACADM    | 4557231   | acyl-Coenzyme A dehydrogenase, C-4 to C-12 straight chain        | Non-cytosolic | 1 | 0.69 | 0.52 | 2.09  | 0.74 | 0.59 | 2.09 |

|      |           |           |                                                                                 |               |   |      |      |      |      |      |      |
|------|-----------|-----------|---------------------------------------------------------------------------------|---------------|---|------|------|------|------|------|------|
| 2.02 | NUDC      | 5729953   | nuclear distribution gene C homolog                                             | Non-cytosolic | 1 | 1.06 | 0.89 | 2.09 | 1.02 | 0.96 | 2.09 |
| 2.02 | SLC16A2   | 5730045   | solute carrier family 16, member 2                                              | Non-cytosolic | 1 | 1.14 | 0.79 | 2.09 | 1.20 | 0.71 | 2.09 |
| 2.02 | TNPO3     | 6912734   | transportin 3                                                                   | Non-cytosolic | 1 | 1.08 | 0.87 | 2.09 | 0.89 | 0.83 | 2.09 |
| 2.02 | HMGB2     | 11321591  | high-mobility group box 2                                                       | Non-cytosolic | 1 | 0.50 | 0.33 | 2.09 | 0.44 | 0.29 | 2.09 |
| 2.02 | MRPL9     | 13899231  | mitochondrial ribosomal protein L9                                              | Non-cytosolic | 1 | 0.94 | 0.91 | 2.09 | 1.19 | 0.72 | 2.09 |
| 2.02 | GOSR2     | 16905522  | golgi SNAP receptor complex member 2 isoform A                                  | Non-cytosolic | 1 | 1.29 | 0.60 | 2.09 | 1.46 | 0.49 | 2.09 |
| 2.02 | GPT2      | 19263340  | alanine aminotransferase 2                                                      | Non-cytosolic | 1 | 1.53 | 0.47 | 2.09 | 1.69 | 0.40 | 2.11 |
| 2.02 | PSMC3     | 21361144  | proteasome 26S ATPase subunit 3                                                 | Non-cytosolic | 1 | 0.95 | 0.94 | 2.05 | 1.12 | 0.69 | 1.45 |
| 2.02 | XPO5      | 22748937  | exportin 5                                                                      | Non-cytosolic | 1 | 0.99 | 0.99 | 1.18 | 1.15 | 0.73 | 1.22 |
| 2.02 | FAR1      | 24308324  | male sterility domain containing 2                                              | Non-cytosolic | 1 | 0.80 | 0.68 | 1.38 | 0.83 | 0.74 | 1.38 |
| 2.02 | ALDH1B1   | 25777730  | aldehyde dehydrogenase 1B1                                                      | Non-cytosolic | 1 | 0.47 | 0.31 | 2.09 | 0.44 | 0.29 | 2.09 |
| 2.02 | ATAD5     | 26080431  | chromosome fragility associated gene 1                                          | Non-cytosolic | 0 | 1.84 | 0.36 | 2.11 | 2.11 | 0.30 | 2.09 |
| 2.02 | EPHA2     | 32967311  | ephrin receptor EphA2                                                           | Non-cytosolic | 1 | 1.37 | 0.57 | 2.09 | 1.39 | 0.54 | 2.09 |
| 2.02 | MTX1      | 38569477  | metaxin 1 isoform 2                                                             | Non-cytosolic | 1 | 0.73 | 0.58 | 2.09 | 0.89 | 0.82 | 2.09 |
| 2.02 | PKP2      | 52630432  | plakophilin 2 isoform 2a                                                        | Non-cytosolic | 1 | 0.99 | 0.95 | 1.14 | 0.95 | 0.92 | 1.14 |
| 2.02 | CCT3      | 63162572  | chaperonin containing TCP1, subunit 3 isoform a                                 | Non-cytosolic | 2 | 0.84 | 0.83 | 1.51 | 0.82 | 0.80 | 1.57 |
| 2.02 | UZAF1     | 68800128  | U2 small nuclear RNA auxiliary factor 1 isoform b                               | Non-cytosolic | 1 | 0.96 | 0.95 | 1.25 | 1.02 | 0.95 | 1.25 |
| 2.02 | HMGB3     | 71143137  | high-mobility group box 3                                                       | Non-cytosolic | 1 | 1.51 | 0.48 | 2.11 | 1.50 | 0.49 | 2.11 |
| 2.02 | MARK2     | 86990441  | MAP/microtubule affinity-regulating kinase 2 isoform a                          | Non-cytosolic | 1 | 1.14 | 0.79 | 2.09 | 0.99 | 0.99 | 2.09 |
| 2.02 | LOC728806 | 113426932 | PREDICTED: similar to N-ethylmaleimide-sensitive factor                         | Non-cytosolic | 1 | 0.98 | 0.99 | 2.09 | 0.94 | 0.91 | 2.09 |
| 2.01 | CASK      | 4502567   | calcium/calmodulin-dependent serine protein kinase (MAGUK family)               | Non-cytosolic | 1 | 0.60 | 0.41 | 1.38 | 0.61 | 0.46 | 1.57 |
| 2.01 | ETFA      | 4503607   | electron transfer flavoprotein, alpha polypeptide                               | Non-cytosolic | 1 | 0.95 | 0.94 | 2.09 | 0.95 | 0.93 | 2.09 |
| 2.01 | TMEM11    | 4505901   | transmembrane protein 11                                                        | Non-cytosolic | 1 | 1.15 | 0.77 | 2.09 | 1.16 | 0.76 | 2.11 |
| 2.01 | PTPN9     | 4506301   | protein tyrosine phosphatase, non-receptor type 9                               | Non-cytosolic | 1 | 0.46 | 0.30 | 2.11 | 0.95 | 0.94 | 2.09 |
| 2.01 | EMD       | 4557553   | emerin                                                                          | Non-cytosolic | 1 | 0.90 | 0.78 | 1.43 | 0.90 | 0.75 | 1.28 |
| 2.01 | MID1      | 4557753   | midline 1 isoform alpha                                                         | Non-cytosolic | 1 | 0.99 | 0.89 | 3.08 | 0.97 | 0.93 | 2.09 |
| 2.01 | RBM39     | 4757926   | RNA binding motif protein 39 isoform b                                          | Non-cytosolic | 1 | 1.04 | 1.00 | 1.28 | 0.87 | 0.78 | 1.22 |
| 2.01 | NOLC1     | 4758860   | nucleolar and coiled-body phosphoprotein 1                                      | Non-cytosolic | 1 | 1.15 | 0.77 | 2.09 | 1.14 | 0.78 | 2.09 |
| 2.01 | PEX14     | 4758896   | peroxisomal biogenesis factor 14                                                | Non-cytosolic | 1 | 0.90 | 0.85 | 2.09 | 0.82 | 0.70 | 2.09 |
| 2.01 | H1FO      | 4885371   | H1 histone family, member 0                                                     | Non-cytosolic | 1 | 0.47 | 0.31 | 2.11 | 0.45 | 0.30 | 2.09 |
| 2.01 | SF3A3     | 5803167   | splicing factor 3a, subunit 3                                                   | Non-cytosolic | 1 | 0.92 | 0.86 | 2.11 | 0.81 | 0.69 | 2.09 |
| 2.01 | DNM1L     | 6996005   | dynamin 1-like protein isoform 1                                                | Non-cytosolic | 1 | 0.77 | 0.64 | 2.09 | 0.89 | 0.83 | 2.09 |
| 2.01 | SLC7A11   | 7657683   | solute carrier family 7, (cationic amino acid transporter, y+ system) member 11 | Non-cytosolic | 1 | 3.31 | 0.35 | 2.13 | 3.31 | 0.34 | 2.51 |
| 2.01 | MRPL48    | 7706333   | mitochondrial ribosomal protein L48                                             | Non-cytosolic | 1 | 0.90 | 0.81 | 1.38 | 0.97 | 0.91 | 1.43 |
| 2.01 | C4orf27   | 8923503   | hypothetical protein LOC54969                                                   | Non-cytosolic | 1 | 1.15 | 0.77 | 2.09 | 1.18 | 0.74 | 2.09 |
| 2.01 | DIABLO    | 9845297   | diablo isoform 1                                                                | Non-cytosolic | 1 | 0.69 | 0.47 | 2.09 | 0.67 | 0.49 | 2.09 |
| 2.01 | ENY2      | 9910186   | enhancer of yellow 2 homolog                                                    | Non-cytosolic | 1 | 1.72 | 0.39 | 2.09 | 1.34 | 0.58 | 2.09 |
| 2.01 | AAAS      | 12962937  | achalasia, adrenocortical insufficiency, alacrimia (Allgrove, triple-A)         | Non-cytosolic | 1 | 0.77 | 0.63 | 2.09 | 0.69 | 0.52 | 2.09 |
| 2.01 | DCTN1     | 13259510  | dynalectin 1 isoform 1                                                          | Non-cytosolic | 1 | 0.91 | 0.87 | 2.09 | 0.75 | 0.61 | 2.09 |
| 2.01 | WDR61     | 13376840  | WD repeat domain 61                                                             | Non-cytosolic | 1 | 0.61 | 0.44 | 2.11 | 0.81 | 0.70 | 2.11 |
| 2.01 | NOL10     | 13430872  | nucleolar protein 10                                                            | Non-cytosolic | 1 | 0.65 | 0.48 | 2.09 | 0.62 | 0.44 | 2.09 |
| 2.01 | CYP2S1    | 13449277  | cytochrome P450, family 2, subfamily S, polypeptide 1                           | Non-cytosolic | 1 | 1.54 | 0.43 | 1.38 | 1.56 | 0.42 | 1.38 |
| 2.01 | MTHFD1    | 13699868  | methylenetetrahydrofolate dehydrogenase 1                                       | Non-cytosolic | 1 | 0.92 | 0.86 | 1.25 | 0.95 | 0.99 | 1.25 |
| 2.01 | SRPRB     | 14917113  | signal recognition particle receptor, beta subunit                              | Non-cytosolic | 1 | 0.89 | 0.79 | 2.83 | 0.93 | 0.90 | 2.09 |
| 2.01 | MRPS23    | 16554604  | mitochondrial ribosomal protein S23                                             | Non-cytosolic | 1 | 1.36 | 0.53 | 1.56 | 1.53 | 0.48 | 1.25 |
| 2.01 | C21orf70  | 17158023  | hypothetical protein LOC85395                                                   | Non-cytosolic | 1 | 1.02 | 0.95 | 2.09 | 0.96 | 0.95 | 2.09 |
| 2.01 | ATP6V0A1  | 19913418  | ATPase, H+ transporting, lysosomal V0 subunit a isoform 1                       | Non-cytosolic | 1 | 1.08 | 0.86 | 2.09 | 1.08 | 0.86 | 2.09 |
| 2.01 | RAB14     | 19923483  | GTPase Rab14                                                                    | Non-cytosolic | 1 | 0.72 | 0.57 | 2.11 | 0.74 | 0.60 | 2.09 |
| 2.01 | PLD2      | 20070141  | phospholipase D2                                                                | Non-cytosolic | 1 | 1.24 | 0.57 | 2.09 | 1.46 | 0.41 | 2.09 |
| 2.01 | PYCR2     | 21361454  | pyrroline-5-carboxylate reductase family, member 2                              | Non-cytosolic | 1 | 1.11 | 0.82 | 2.09 | 1.08 | 0.86 | 2.09 |
| 2.01 | SFRS8     | 23111062  | splicing factor, arginine/serine-rich 8                                         | Non-cytosolic | 1 | 0.92 | 0.87 | 1.18 | 0.95 | 0.94 | 1.18 |
| 2.01 | NUDT16    | 24308370  | nudix-type motif 16                                                             | Non-cytosolic | 1 | 1.25 | 0.67 | 2.11 | 1.03 | 0.94 | 2.09 |
| 2.01 | LACTB     | 26051231  | lactamase, beta isoform a                                                       | Non-cytosolic | 1 | 0.82 | 0.73 | 2.11 | 0.88 | 0.82 | 2.09 |
| 2.01 | HEATR2    | 31377744  | HEAT repeat containing 2                                                        | Non-cytosolic | 1 | 0.95 | 0.93 | 2.09 | 1.14 | 0.78 | 2.09 |
| 2.01 | STAG2     | 31563531  | stromal antigen 2 isoform b                                                     | Non-cytosolic | 1 | 0.94 | 0.90 | 2.09 | 1.16 | 0.75 | 2.09 |
| 2.01 | NFS1      | 32307132  | NFS1 nitrogen fixation 1                                                        | Non-cytosolic | 1 | 0.91 | 0.87 | 2.09 | 0.99 | 0.99 | 2.09 |
| 2.01 | TM9SF3    | 33859833  | transmembrane 9 superfamily member 3                                            | Non-cytosolic | 1 | 1.07 | 0.88 | 2.09 | 1.04 | 0.93 | 2.29 |
| 2.01 | DDX18     | 38327634  | DEAD (Asp-Glu-Ala-Asp) box polypeptide 18                                       | Non-cytosolic | 1 | 0.76 | 0.78 | 1.31 | 0.74 | 0.82 | 1.31 |
| 2.01 | NOL9      | 40217805  | nucleolar protein 9                                                             | Non-cytosolic | 1 | 0.95 | 0.93 | 2.09 | 0.94 | 0.91 | 2.09 |
| 2.01 | ABCB7     | 42490749  | ATP-binding cassette, sub-family B, member 7                                    | Non-cytosolic | 1 | 0.96 | 0.97 | 2.09 | 0.91 | 0.85 | 2.09 |
| 2.01 | CAPRN1    | 42558250  | membrane component chromosome 11 surface marker 1 isoform 1                     | Non-cytosolic | 1 | 0.82 | 0.71 | 2.09 | 1.07 | 0.88 | 2.09 |

|      |           |           |                                                                                   |               |    |      |      |      |      |      |      |
|------|-----------|-----------|-----------------------------------------------------------------------------------|---------------|----|------|------|------|------|------|------|
| 2.01 | EIF3G     | 49472822  | eukaryotic translation initiation factor 3, subunit 4 delta, 44kDa                | Non-cytosolic | 1  | 1.20 | 0.71 | 2.09 | 1.22 | 0.69 | 2.11 |
| 2.01 | FLJ20254  | 53793660  | hypothetical protein LOC54867                                                     | Non-cytosolic | 1  | 1.06 | 0.90 | 2.09 | 0.99 | 0.99 | 2.09 |
| 2.01 | C21orf57  | 54607074  | hypothetical protein LOC54059 isoform 2                                           | Non-cytosolic | 1  | 0.82 | 0.71 | 2.09 | 0.79 | 0.67 | 2.11 |
| 2.01 | DNAJC16   | 56687498  | Dnaj (Hsp40) homolog, subfamily C, member 16                                      | Non-cytosolic | 1  | 1.25 | 0.66 | 2.09 | 1.26 | 0.65 | 2.09 |
| 2.01 | KIAA0391  | 62988276  | hypothetical protein LOC9692                                                      | Non-cytosolic | 1  | 1.94 | 0.34 | 2.09 | 1.89 | 0.35 | 2.11 |
| 2.01 | CPT1A     | 73623030  | carnitine palmitoyltransferase 1A isoform 1                                       | Non-cytosolic | 1  | 1.77 | 0.45 | 1.71 | 2.70 | 0.28 | 2.01 |
| 2.01 | LOC643446 | 88973230  | PREDICTED: similar to ribonucleic acid binding protein S1 isoform 3               | Non-cytosolic | 1  | 0.90 | 0.84 | 2.09 | 0.84 | 0.75 | 2.09 |
| 2.01 | LOC653888 | 89026256  | PREDICTED: similar to Actin-related protein 2/3 complex subunit 1B                | Non-cytosolic | 1  | 0.65 | 0.48 | 2.11 | 0.66 | 0.49 | 2.09 |
| 2.01 | LOC644969 | 89060813  | PREDICTED: similar to Ubiquinol-cytochrome c reductase complex 14 kDa protein     | Non-cytosolic | 1  | 1.33 | 0.59 | 2.11 | 1.22 | 0.68 | 2.09 |
| 2.01 | LOC643790 | 113425437 | PREDICTED: similar to Nonhistone chromosomal protein HMG-14 containing protein 1) | Non-cytosolic | 1  | 0.67 | 0.50 | 2.09 | 0.64 | 0.46 | 2.11 |
| 2.01 | WIZ       | 113428506 | PREDICTED: similar to widely-interspaced zinc finger motifs isoform 2 isoform 10  | Non-cytosolic | 1  | 0.53 | 0.36 | 2.09 | 0.72 | 0.56 | 2.11 |
| 2.01 | IGF2R     | 119964726 | insulin-like growth factor 2 receptor                                             | Non-cytosolic | 1  | 0.97 | 0.97 | 2.09 | 0.92 | 0.88 | 2.09 |
| 2    | CD9       | 4502693   | CD9 antigen                                                                       | Non-cytosolic | 1  | 1.31 | 0.61 | 2.09 | 1.37 | 0.56 | 2.09 |
| 2    | CSNK2A1   | 4503095   | casein kinase II alpha 1 subunit isoform a                                        | Non-cytosolic | 1  | 0.87 | 0.80 | 2.09 | 0.91 | 0.87 | 2.09 |
| 2    | CSRP2     | 4503101   | cysteine and glycine-rich protein 2                                               | Non-cytosolic | 1  | 0.60 | 0.43 | 2.11 | 0.70 | 0.54 | 2.11 |
| 2    | CSTB      | 4503117   | cystatin B                                                                        | Non-cytosolic | 1  | 0.51 | 0.33 | 2.09 | 0.50 | 0.33 | 2.11 |
| 2    | CYB5R3    | 4503327   | cytochrome b5 reductase isoform 1                                                 | Non-cytosolic | 1  | 0.84 | 0.86 | 1.34 | 0.91 | 0.88 | 1.37 |
| 2    | DKC1      | 4503337   | dyskerin                                                                          | Non-cytosolic | 2  | 0.92 | 0.83 | 1.42 | 0.93 | 0.92 | 1.41 |
| 2    | DPYSL2    | 4503377   | dihydropyrimidinase-like 2                                                        | Non-cytosolic | 1  | 0.62 | 0.44 | 2.09 | 0.59 | 0.41 | 2.09 |
| 2    | EF1A2     | 4503475   | eukaryotic translation elongation factor 1 alpha 2                                | Non-cytosolic | 14 | 0.89 | 0.83 | 1.38 | 0.90 | 0.77 | 1.45 |
| 2    | EIF3I     | 4503513   | eukaryotic translation initiation factor 3, subunit 2 beta, 36kDa                 | Non-cytosolic | 1  | 0.95 | 0.94 | 2.09 | 1.22 | 0.68 | 2.09 |
| 2    | HADHB     | 4504327   | mitochondrial trifunctional protein, beta subunit                                 | Non-cytosolic | 1  | 0.41 | 0.27 | 2.11 | 0.34 | 0.23 | 2.11 |
| 2    | HMGA1     | 4504433   | high mobility group AT-hook 1 isoform b                                           | Non-cytosolic | 1  | 1.63 | 0.42 | 2.09 | 1.49 | 0.49 | 2.09 |
| 2    | DNAJA1    | 4504511   | Dnaj (Hsp40) homolog, subfamily A, member 1                                       | Non-cytosolic | 1  | 0.77 | 0.58 | 1.25 | 0.77 | 0.59 | 1.25 |
| 2    | KPNA4     | 4504901   | karyopherin alpha 4                                                               | Non-cytosolic | 1  | 0.99 | 0.81 | 3.94 | 1.01 | 0.84 | 2.65 |
| 2    | PFKM      | 4505749   | phosphofructokinase, muscle                                                       | Non-cytosolic | 1  | 0.86 | 0.77 | 2.09 | 0.90 | 0.85 | 2.09 |
| 2    | PSMB5     | 4506201   | proteasome beta 5 subunit                                                         | Non-cytosolic | 1  | 1.01 | 0.97 | 2.09 | 1.29 | 0.62 | 2.09 |
| 2    | MPZL1     | 4506357   | myelin protein zero-like 1 isoform a                                              | Non-cytosolic | 1  | 0.73 | 0.62 | 4.49 | 1.31 | 0.57 | 2.88 |
| 2    | RPL37A    | 4506643   | ribosomal protein L37a                                                            | Non-cytosolic | 1  | 0.82 | 0.71 | 2.09 | 1.09 | 0.86 | 2.09 |
| 2    | RPL39     | 4506647   | ribosomal protein L39                                                             | Non-cytosolic | 1  | 1.26 | 0.59 | 1.38 | 1.32 | 0.57 | 1.38 |
| 2    | SNRPE     | 4507129   | small nuclear ribonucleoprotein polypeptide E                                     | Non-cytosolic | 1  | 0.81 | 0.69 | 2.09 | 0.79 | 0.66 | 2.11 |
| 2    | UBE2I     | 4507785   | ubiquitin-conjugating enzyme E2I                                                  | Non-cytosolic | 1  | 0.88 | 0.81 | 2.09 | 0.87 | 0.80 | 2.09 |
| 2    | UGCG      | 4507811   | ceramide glucosyltransferase                                                      | Non-cytosolic | 1  | 1.20 | 0.71 | 2.09 | 0.95 | 0.93 | 2.09 |
| 2    | ACSL4     | 4758332   | acyl-CoA synthetase long-chain family member 4 isoform 1                          | Non-cytosolic | 1  | 0.72 | 0.56 | 2.09 | 0.74 | 0.59 | 2.09 |
| 2    | NDUFS3    | 4758788   | NADH dehydrogenase (ubiquinone) Fe-S protein 3, 30kDa                             | Non-cytosolic | 1  | 0.93 | 0.89 | 2.09 | 0.91 | 0.87 | 2.09 |
| 2    | ETF1      | 4759034   | eukaryotic translation termination factor 1                                       | Non-cytosolic | 1  | 1.47 | 0.50 | 2.09 | 1.45 | 0.51 | 2.11 |
| 2    | MRPL33    | 4759048   | mitochondrial ribosomal protein L33 isoform a                                     | Non-cytosolic | 1  | 1.82 | 0.36 | 2.09 | 1.61 | 0.43 | 2.11 |
| 2    | SCO1      | 4759068   | cytochrome oxidase deficient homolog 1                                            | Non-cytosolic | 1  | 1.19 | 0.73 | 2.11 | 0.96 | 0.95 | 2.09 |
| 2    | VAPB      | 4759302   | VAMP-associated protein B/C                                                       | Non-cytosolic | 1  | 0.89 | 0.83 | 2.09 | 0.84 | 0.74 | 2.09 |
| 2    | RBM8A     | 4826972   | RNA binding motif protein 8A                                                      | Non-cytosolic | 1  | 0.98 | 0.98 | 2.09 | 0.82 | 0.72 | 2.09 |
| 2    | ARPC4     | 5031595   | actin related protein 2/3 complex subunit 4 isoform a                             | Non-cytosolic | 1  | 1.02 | 0.95 | 2.09 | 1.03 | 0.94 | 2.09 |
| 2    | NACA      | 5031931   | nascent-polypeptide-associated complex alpha polypeptide                          | Non-cytosolic | 1  | 1.13 | 0.69 | 1.15 | 1.21 | 0.63 | 1.15 |
| 2    | ALG3      | 5031953   | asparagine-linked glycosylation 3                                                 | Non-cytosolic | 1  | 1.04 | 0.91 | 3.13 | 1.20 | 0.71 | 2.09 |
| 2    | MFG8      | 5174557   | milk fat globule-EGF factor 8 protein                                             | Non-cytosolic | 1  | 0.66 | 0.49 | 2.09 | 0.77 | 0.63 | 2.09 |
| 2    | SLC25A17  | 5453918   | solute carrier family 25, member 17                                               | Non-cytosolic | 1  | 1.74 | 0.39 | 2.11 | 1.46 | 0.50 | 2.09 |
| 2    | IPO7      | 5453998   | importin 7                                                                        | Non-cytosolic | 1  | 1.12 | 0.81 | 2.09 | 0.90 | 0.85 | 2.09 |
| 2    | ELL       | 5729812   | elongation factor RNA polymerase II                                               | Non-cytosolic | 1  | 0.55 | 0.38 | 2.09 | 0.75 | 0.60 | 2.09 |
| 2    | SCAMP2    | 5730031   | secretory carrier membrane protein 2                                              | Non-cytosolic | 1  | 1.05 | 0.58 | 5.01 | 1.15 | 0.55 | 2.29 |
| 2    | LMAN2     | 5803023   | lectin, mannose-binding 2                                                         | Non-cytosolic | 1  | 1.74 | 0.67 | 1.34 | 1.85 | 0.67 | 1.45 |
| 2    | HNRNPA0   | 5803036   | heterogeneous nuclear ribonucleoprotein A0                                        | Non-cytosolic | 2  | 1.36 | 0.57 | 2.11 | 1.37 | 0.56 | 2.09 |
| 2    | METAP2    | 5803092   | methionyl aminopeptidase 2                                                        | Non-cytosolic | 1  | 1.02 | 0.99 | 2.09 | 0.94 | 0.87 | 2.09 |
| 2    | GTF3C3    | 6912398   | general transcription factor IIIC, polypeptide 3, 102kDa                          | Non-cytosolic | 1  | 0.73 | 0.55 | 1.25 | 0.76 | 0.61 | 1.25 |
| 2    | CACYBP    | 7656952   | calyculin binding protein isoform 1                                               | Non-cytosolic | 1  | 0.66 | 0.48 | 2.09 | 0.74 | 0.59 | 2.09 |
| 2    | NDUFA4    | 7661786   | hormone-regulated proliferation-associated 20 kDa protein                         | Non-cytosolic | 1  | 0.94 | 0.94 | 1.92 | 0.95 | 0.94 | 1.38 |
| 2    | CLINT1    | 7661968   | epsin 4                                                                           | Non-cytosolic | 1  | 1.37 | 0.57 | 2.11 | 1.39 | 0.55 | 2.11 |
| 2    | TMEM14C   | 7705501   | transmembrane protein 14C                                                         | Non-cytosolic | 1  | 1.07 | 0.88 | 2.09 | 1.08 | 0.87 | 2.09 |
| 2    | GOLT1B    | 7705636   | golgi transport 1 homolog B                                                       | Non-cytosolic | 1  | 1.32 | 0.61 | 1.25 | 1.22 | 0.66 | 1.49 |
| 2    | TMX2      | 7705726   | thioredoxin-related transmembrane protein 2                                       | Non-cytosolic | 1  | 0.72 | 0.57 | 2.09 | 0.76 | 0.62 | 2.09 |
| 2    | MRPS7     | 7705738   | mitochondrial ribosomal protein S7                                                | Non-cytosolic | 1  | 1.31 | 0.61 | 2.11 | 1.34 | 0.58 | 2.11 |
| 2    | ATP6V1D   | 7706757   | H(+)-transporting two-sector ATPase                                               | Non-cytosolic | 1  | 0.94 | 0.91 | 2.09 | 1.06 | 0.89 | 2.09 |
| 2    | MAGOHB    | 8922331   | mago-nashi homolog 2                                                              | Non-cytosolic | 1  | 0.99 | 1.00 | 1.15 | 1.03 | 0.92 | 1.15 |

|   |           |          |                                                                                 |               |   |      |      |       |      |      |      |
|---|-----------|----------|---------------------------------------------------------------------------------|---------------|---|------|------|-------|------|------|------|
| 2 | C14orf115 | 8922686  | hypothetical protein LOC55237                                                   | Non-cytosolic | 1 | 0.94 | 0.84 | 2.09  | 0.96 | 0.77 | 4.21 |
| 2 | C11orf59  | 8923579  | hypothetical protein LOC55004                                                   | Non-cytosolic | 1 | 0.74 | 0.60 | 2.09  | 0.71 | 0.56 | 2.11 |
| 2 | H2AFY2    | 8923920  | core histone macroH2A2.2                                                        | Non-cytosolic | 1 | 0.33 | 0.22 | 2.11  | 0.34 | 0.23 | 2.70 |
| 2 | EXOSC4    | 9506689  | exosome component 4                                                             | Non-cytosolic | 1 | 0.77 | 0.61 | 2.11  | 0.77 | 0.61 | 2.09 |
| 2 | DDX56     | 9506931  | DEAD (Asp-Glu-Ala-Asp) box polypeptide 56                                       | Non-cytosolic | 1 | 0.74 | 0.59 | 2.09  | 0.79 | 0.67 | 2.09 |
| 2 | SH3GLB2   | 9910352  | SH3-containing protein SH3GLB2                                                  | Non-cytosolic | 1 | 1.50 | 0.48 | 2.09  | 1.38 | 0.55 | 2.11 |
| 2 | TOMM22    | 9910382  | mitochondrial import receptor Tom22                                             | Non-cytosolic | 1 | 1.10 | 0.84 | 2.09  | 1.19 | 0.72 | 2.09 |
| 2 | NMT1      | 10835073 | N-myristoyltransferase 1                                                        | Non-cytosolic | 1 | 3.56 | 0.44 | 2.27  | 2.91 | 0.53 | 2.09 |
| 2 | FAM60A    | 10864049 | family with sequence similarity 60, member A                                    | Non-cytosolic | 1 | 1.25 | 0.67 | 2.11  | 1.19 | 0.72 | 2.09 |
| 2 | RPRD1B    | 11034845 | hypothetical protein LOC58490                                                   | Non-cytosolic | 1 | 0.82 | 0.71 | 2.09  | 0.63 | 0.45 | 2.11 |
| 2 | CD2AP     | 11321634 | CD2-associated protein                                                          | Non-cytosolic | 1 | 1.54 | 0.46 | 2.11  | 1.36 | 0.57 | 2.09 |
| 2 | PSAP      | 11386147 | prosaposin isoform a preproprotein                                              | Non-cytosolic | 1 | 1.11 | 0.83 | 2.09  | 0.82 | 0.71 | 2.09 |
| 2 | MAP1LC3B  | 12383056 | microtubule-associated proteins 1A/1B light chain 3                             | Non-cytosolic | 1 | 0.93 | 0.85 | 2.00  | 0.94 | 0.85 | 1.69 |
| 2 | HDAC1     | 13128860 | histone deacetylase 1                                                           | Non-cytosolic | 1 | 0.89 | 0.83 | 2.11  | 0.87 | 0.80 | 2.09 |
| 2 | MRP63     | 13128970 | mitochondrial ribosomal protein 63                                              | Non-cytosolic | 1 | 1.09 | 0.85 | 2.09  | 1.34 | 0.58 | 2.09 |
| 2 | DPY30     | 14211889 | dpy-30-like protein                                                             | Non-cytosolic | 1 | 1.18 | 0.73 | 1.38  | 1.15 | 0.69 | 1.38 |
| 2 | CIRH1A    | 14249536 | cirhin                                                                          | Non-cytosolic | 1 | 1.28 | 0.63 | 2.09  | 1.14 | 0.78 | 2.09 |
| 2 | RPL36     | 16117796 | ribosomal protein L36                                                           | Non-cytosolic | 1 | 0.99 | 1.00 | 1.10  | 0.95 | 0.90 | 1.10 |
| 2 | CDC42     | 16357472 | cell division cycle 42 isoform 2                                                | Non-cytosolic | 2 | 0.94 | 0.88 | 1.14  | 0.95 | 0.87 | 1.14 |
| 2 | SCAMP3    | 16445421 | secretory carrier membrane protein 3 isoform 2                                  | Non-cytosolic | 1 | 0.54 | 0.36 | 10.96 | 0.57 | 0.45 | 7.66 |
| 2 | MRPL51    | 16950607 | mitochondrial ribosomal protein L51                                             | Non-cytosolic | 1 | 1.05 | 0.92 | 2.09  | 1.00 | 0.99 | 2.09 |
| 2 | PSAT1     | 17402893 | phosphoserine aminotransferase isoform 1                                        | Non-cytosolic | 1 | 0.86 | 0.78 | 2.09  | 1.00 | 0.99 | 2.09 |
| 2 | COX15     | 17921987 | COX15 homolog isoform 2                                                         | Non-cytosolic | 1 | 0.97 | 0.97 | 2.09  | 1.12 | 0.81 | 2.09 |
| 2 | BAT3      | 18375634 | HLA-B associated transcript-3 isoform a                                         | Non-cytosolic | 1 | 1.91 | 0.34 | 2.09  | 1.77 | 0.38 | 2.11 |
| 2 | THY1      | 19923362 | Thy-1 cell surface antigen                                                      | Non-cytosolic | 1 | 1.08 | 0.87 | 2.09  | 1.12 | 0.81 | 2.09 |
| 2 | CSDA      | 20070160 | cold shock domain protein A                                                     | Non-cytosolic | 3 | 0.53 | 0.55 | 1.42  | 0.39 | 0.49 | 1.56 |
| 2 | RACGAP1   | 21361397 | Rac GTPase activating protein 1                                                 | Non-cytosolic | 1 | 1.38 | 0.55 | 2.09  | 1.07 | 0.88 | 2.09 |
| 2 | SLC25A1   | 21389315 | solute carrier family 25 (mitochondrial carrier; citrate transporter), member 1 | Non-cytosolic | 1 | 1.03 | 0.68 | 1.10  | 1.00 | 0.72 | 1.11 |
| 2 | HN1L      | 21700763 | chromosome 16 open reading frame 34                                             | Non-cytosolic | 1 | 0.81 | 0.63 | 1.38  | 0.80 | 0.69 | 1.98 |
| 2 | 6-Sep     | 22035581 | septin 6 isoform D                                                              | Non-cytosolic | 1 | 0.65 | 0.48 | 2.09  | 0.57 | 0.39 | 2.09 |
| 2 | MRPL24    | 22035590 | mitochondrial ribosomal protein L24                                             | Non-cytosolic | 1 | 0.77 | 0.60 | 2.09  | 0.90 | 0.78 | 2.17 |
| 2 | HMGA1     | 22208977 | high mobility group AT-hook 1 isoform a                                         | Non-cytosolic | 1 | 1.61 | 0.58 | 1.45  | 1.56 | 0.60 | 1.53 |
| 2 | PSMA6     | 23110944 | proteasome alpha 6 subunit                                                      | Non-cytosolic | 1 | 0.94 | 0.89 | 2.09  | 0.95 | 0.76 | 2.09 |
| 2 | MBOAT7    | 23308572 | leukocyte receptor cluster (LRC) member 4 protein                               | Non-cytosolic | 1 | 0.70 | 0.52 | 1.24  | 0.76 | 0.58 | 1.25 |
| 2 | HIBADH    | 23308751 | 3-hydroxyisobutyrate dehydrogenase                                              | Non-cytosolic | 1 | 0.87 | 0.51 | 2.09  | 0.85 | 0.54 | 2.09 |
| 2 | DYNC1I2   | 24307879 | dynein, cytoplasmic, intermediate polypeptide 2                                 | Non-cytosolic | 1 | 1.21 | 0.70 | 2.09  | 1.10 | 0.84 | 2.09 |
| 2 | METAP1    | 24308009 | methionyl aminopeptidase 1                                                      | Non-cytosolic | 1 | 0.88 | 0.78 | 2.09  | 0.89 | 0.81 | 2.09 |
| 2 | AHCL2     | 24308043 | adenosylhomocysteinease 3                                                       | Non-cytosolic | 1 | 1.22 | 0.55 | 1.75  | 1.20 | 0.63 | 1.38 |
| 2 | DNAJC10   | 24308127 | Dnaj (Hsp40) homolog, subfamily C, member 10                                    | Non-cytosolic | 1 | 0.91 | 0.87 | 2.09  | 1.00 | 0.98 | 2.09 |
| 2 | TMCO1     | 24308133 | putative membrane protein                                                       | Non-cytosolic | 1 | 0.49 | 0.46 | 1.36  | 0.50 | 0.44 | 1.43 |
| 2 | PSMC1     | 24430151 | proteasome 26S ATPase subunit 1                                                 | Non-cytosolic | 1 | 1.09 | 0.91 | 1.39  | 1.14 | 0.76 | 1.38 |
| 2 | FAF2      | 24797106 | UBX domain containing 8                                                         | Non-cytosolic | 1 | 2.47 | 0.26 | 2.09  | 1.75 | 0.38 | 2.11 |
| 2 | NUP133    | 26051235 | nucleoporin 133kDa                                                              | Non-cytosolic | 1 | 0.84 | 0.78 | 1.39  | 0.90 | 0.86 | 1.38 |
| 2 | IDH3B     | 28178821 | isocitrate dehydrogenase 3, beta subunit isoform a                              | Non-cytosolic | 1 | 1.19 | 0.73 | 2.09  | 1.10 | 0.79 | 3.05 |
| 2 | RHOC      | 28395033 | ras homolog gene family, member C                                               | Non-cytosolic | 1 | 0.89 | 0.75 | 1.14  | 0.86 | 0.70 | 1.14 |
| 2 | KIFC1     | 28626498 | kinesin family member C1                                                        | Non-cytosolic | 1 | 1.38 | 0.55 | 2.09  | 1.14 | 0.78 | 2.09 |
| 2 | RCN3      | 28626510 | reticulocalbin 3, EF-hand calcium binding domain                                | Non-cytosolic | 1 | 3.44 | 0.29 | 1.50  | 3.44 | 0.29 | 1.50 |
| 2 | MRPL43    | 28872736 | mitochondrial ribosomal protein L43 isoform c                                   | Non-cytosolic | 2 | 0.93 | 0.89 | 2.09  | 1.01 | 0.96 | 2.09 |
| 2 | MYL9      | 29568111 | myosin regulatory light chain 9 isoform a                                       | Non-cytosolic | 1 | 0.74 | 0.81 | 1.24  | 0.74 | 0.83 | 1.20 |
| 2 | GLT25D1   | 31377697 | glycosyltransferase 25 domain containing 1                                      | Non-cytosolic | 1 | 0.72 | 0.55 | 2.11  | 0.65 | 0.46 | 2.09 |
| 2 | SANMM50   | 31542301 | sorting and assembly machinery component 50 homolog                             | Non-cytosolic | 1 | 0.95 | 0.92 | 1.38  | 0.97 | 0.95 | 1.38 |
| 2 | ADPGK     | 31542509 | ADP-dependent glucokinase                                                       | Non-cytosolic | 1 | 0.77 | 0.63 | 2.11  | 0.65 | 0.47 | 2.09 |
| 2 | TMED7     | 32996709 | transmembrane emp24 protein transport domain containing 7                       | Non-cytosolic | 1 | 0.98 | 0.99 | 2.09  | 0.95 | 0.95 | 2.09 |
| 2 | SRPK2     | 33188449 | SFRS protein kinase 2 isoform a                                                 | Non-cytosolic | 1 | 0.66 | 0.49 | 2.09  | 0.80 | 0.69 | 2.11 |
| 2 | TP53I11   | 33695117 | p53-induced protein                                                             | Non-cytosolic | 1 | 0.32 | 0.32 | 1.43  | 0.42 | 0.38 | 1.46 |
| 2 | CNPY3     | 33942072 | trinucleotide repeat containing 5 isoform 1                                     | Non-cytosolic | 1 | 0.79 | 0.65 | 2.15  | 0.82 | 0.72 | 2.09 |
| 2 | LPCAT1    | 33946291 | acyltransferase like 2                                                          | Non-cytosolic | 1 | 0.80 | 0.62 | 1.25  | 0.84 | 0.69 | 1.25 |
| 2 | RBPMS2    | 34915990 | RNA binding protein with multiple splicing 2                                    | Non-cytosolic | 1 | 1.66 | 0.41 | 2.09  | 1.98 | 0.33 | 2.09 |
| 2 | ALG6      | 38026892 | asparagine-linked glycosylation 6                                               | Non-cytosolic | 1 | 0.69 | 0.52 | 2.09  | 0.67 | 0.50 | 2.09 |
| 2 | TMX3      | 38505222 | thioredoxin domain containing 10                                                | Non-cytosolic | 1 | 1.18 | 0.73 | 2.09  | 1.06 | 0.89 | 2.09 |
| 2 | KIAA1967  | 40548408 | p30 DBC protein                                                                 | Non-cytosolic | 1 | 0.97 | 0.97 | 2.09  | 1.07 | 0.88 | 2.09 |

|      |           |           |                                                                                              |               |   |      |      |       |      |      |       |
|------|-----------|-----------|----------------------------------------------------------------------------------------------|---------------|---|------|------|-------|------|------|-------|
| 2    | RTN3      | 41393608  | reticulon 3 isoform b                                                                        | Non-cytosolic | 1 | 0.85 | 0.74 | 1.38  | 0.86 | 0.74 | 1.38  |
| 2    | GPX1      | 41406084  | glutathione peroxidase 1 isoform 1                                                           | Non-cytosolic | 1 | 0.82 | 0.72 | 2.09  | 0.79 | 0.67 | 2.09  |
| 2    | EPB41     | 42716291  | erythrocyte membrane protein band 4.1 (elliptocytosis 1, RH-linked) isoform 2                | Non-cytosolic | 1 | 0.63 | 0.45 | 2.09  | 0.71 | 0.55 | 2.09  |
| 2    | CCAR1     | 46852388  | cell-cycle and apoptosis regulatory protein 1                                                | Non-cytosolic | 1 | 1.42 | 0.54 | 1.38  | 1.45 | 0.51 | 1.38  |
| 2    | TIMM50    | 48526509  | translocase of inner mitochondrial membrane 50 homolog                                       | Non-cytosolic | 1 | 4.29 | 0.33 | 2.00  | 4.17 | 0.35 | 2.03  |
| 2    | FAM162A   | 49355721  | growth and transformation-dependent protein                                                  | Non-cytosolic | 1 | 0.95 | 0.93 | 2.09  | 0.95 | 0.93 | 2.09  |
| 2    | MAP1S     | 50428935  | BPY2 interacting protein 1                                                                   | Non-cytosolic | 1 | 0.78 | 0.65 | 2.09  | 1.26 | 0.65 | 2.09  |
| 2    | NDUFA6    | 51317370  | NADH dehydrogenase (ubiquinone) 1 alpha subcomplex, 6, 14kDa                                 | Non-cytosolic | 1 | 1.05 | 0.90 | 2.09  | 1.04 | 0.92 | 2.09  |
| 2    | ALG11     | 51889724  | asparagine-linked glycosylation 11 homolog                                                   | Non-cytosolic | 1 | 0.76 | 0.62 | 2.09  | 0.90 | 0.86 | 2.09  |
| 2    | GOSR1     | 55770858  | golgi SNAP receptor complex member 1 isoform 2                                               | Non-cytosolic | 1 | 1.18 | 0.74 | 2.09  | 1.32 | 0.59 | 2.09  |
| 2    | SMPDL3B   | 57242800  | acid sphingomyelinase-like phosphodiesterase 3B isoform 2                                    | Non-cytosolic | 1 | 1.56 | 0.46 | 2.11  | 2.01 | 0.32 | 2.09  |
| 2    | RRP1B     | 57863269  | hypothetical protein LOC23076                                                                | Non-cytosolic | 1 | 0.90 | 0.86 | 2.09  | 0.98 | 0.99 | 2.09  |
| 2    | EARS2     | 58037537  | glutamyl-tRNA synthetase 2 (mitochondrial)(putative)                                         | Non-cytosolic | 1 | 0.78 | 0.66 | 1.38  | 0.89 | 0.82 | 1.38  |
| 2    | MAGEA4    | 58530871  | melanoma antigen family A, 4                                                                 | Non-cytosolic | 1 | 6.14 | 0.21 | 1.69  | 5.15 | 0.23 | 1.82  |
| 2    | 7-Sep     | 58535461  | cell division cycle 10 isoform 2                                                             | Non-cytosolic | 1 | 0.60 | 0.42 | 2.09  | 0.58 | 0.40 | 2.11  |
| 2    | OClAD2    | 62244044  | OClA domain containing 2 isoform 1                                                           | Non-cytosolic | 1 | 2.38 | 0.27 | 2.09  | 2.07 | 0.31 | 2.11  |
| 2    | ILK       | 62420875  | integrin-linked kinase                                                                       | Non-cytosolic | 1 | 1.08 | 0.84 | 1.21  | 1.12 | 0.77 | 1.18  |
| 2    | PAR6B     | 62955042  | PAR-6 beta                                                                                   | Non-cytosolic | 1 | 0.90 | 0.83 | 1.89  | 0.85 | 0.75 | 1.58  |
| 2    | TMEM205   | 63055043  | hypothetical protein LOC374882                                                               | Non-cytosolic | 1 | 0.82 | 0.71 | 2.09  | 0.86 | 0.78 | 2.09  |
| 2    | CORO1B    | 65787364  | coronin, actin binding protein, 1B                                                           | Non-cytosolic | 1 | 0.63 | 0.45 | 2.11  | 0.65 | 0.47 | 2.09  |
| 2    | NCEH1     | 68051721  | arylacetamide deacetylase-like 1                                                             | Non-cytosolic | 1 | 1.00 | 0.98 | 2.09  | 0.93 | 0.90 | 2.09  |
| 2    | YIPF5     | 68226422  | smooth muscle cell associated protein 5                                                      | Non-cytosolic | 1 | 1.18 | 0.73 | 2.09  | 1.17 | 0.75 | 2.09  |
| 2    | MCAM      | 71274107  | melanoma cell adhesion molecule                                                              | Non-cytosolic | 1 | 1.89 | 0.35 | 2.11  | 1.98 | 0.33 | 2.09  |
| 2    | ZNF207    | 73808090  | zinc finger protein 207 isoform b                                                            | Non-cytosolic | 1 | 1.20 | 0.70 | 2.09  | 1.18 | 0.73 | 2.09  |
| 2    | CSTF1     | 75709220  | cleavage stimulation factor subunit 1                                                        | Non-cytosolic | 1 | 1.36 | 0.57 | 2.09  | 0.92 | 0.88 | 2.09  |
| 2    | EIF4A2    | 83700235  | eukaryotic translation initiation factor 4A2                                                 | Non-cytosolic | 3 | 0.79 | 0.62 | 2.09  | 0.79 | 0.57 | 2.09  |
| 2    | CY5B      | 83921614  | cytochrome b5 outer mitochondrial membrane                                                   | Non-cytosolic | 1 | 0.96 | 0.95 | 1.11  | 0.96 | 0.99 | 1.12  |
| 2    | CD151     | 87159824  | CD151 antigen                                                                                | Non-cytosolic | 1 | 1.34 | 0.58 | 2.09  | 1.43 | 0.52 | 2.27  |
| 2    | LOC119358 | 89033538  | PREDICTED: similar to small nuclear ribonucleoprotein D2                                     | Non-cytosolic | 1 | 0.93 | 0.90 | 2.09  | 0.84 | 0.75 | 2.09  |
| 2    | MRPL19    | 94557305  | mitochondrial ribosomal protein L19                                                          | Non-cytosolic | 1 | 1.24 | 0.67 | 2.09  | 1.31 | 0.62 | 2.11  |
| 2    | ABCE1     | 108773784 | ATP-binding cassette, sub-family E, member 1                                                 | Non-cytosolic | 1 | 1.09 | 0.85 | 2.09  | 1.09 | 0.85 | 2.09  |
| 2    | CARHSP1   | 109715858 | calcium-regulated heat-stable protein 1                                                      | Non-cytosolic | 1 | 0.97 | 0.99 | 13.30 | 0.90 | 0.84 | 2.42  |
| 2    | KIAA0692  | 113423576 | PREDICTED: similar to Y55F3BR.8a isoform 1                                                   | Non-cytosolic | 1 | 0.82 | 0.71 | 2.11  | 1.09 | 0.85 | 2.09  |
| 2    | ATP6V0C   | 113426288 | PREDICTED: similar to Vacuolar ATP synthase 16 kDa proteolipid subunit                       | Non-cytosolic | 1 | 0.76 | 0.62 | 2.09  | 0.68 | 0.51 | 2.11  |
| 2    | ALDH9A1   | 115387104 | aldehyde dehydrogenase 9A1                                                                   | Non-cytosolic | 1 | 0.77 | 0.64 | 2.09  | 0.87 | 0.80 | 2.09  |
| 2    | RER1      | 116812591 | RER1 retention in endoplasmic reticulum 1                                                    | Non-cytosolic | 1 | 1.00 | 0.98 | 2.09  | 1.00 | 0.98 | 2.09  |
| 2    | RAVER1    | 123173757 | RAVER1                                                                                       | Non-cytosolic | 1 | 1.16 | 0.76 | 2.09  | 1.10 | 0.84 | 2.09  |
| 2    | FAR5B     | 124028525 | phenylalanyl-tRNA synthetase, beta subunit                                                   | Non-cytosolic | 1 | 0.90 | 0.80 | 1.38  | 0.91 | 0.82 | 1.54  |
| 2    | IK        | 125988409 | RED protein                                                                                  | Non-cytosolic | 1 | 0.83 | 0.73 | 2.09  | 0.84 | 0.75 | 2.09  |
| 1.99 | NOC3L     | 20806097  | nucleolar complex associated 3 homolog                                                       | Non-cytosolic | 1 | 1.04 | 0.92 | 2.09  | 0.90 | 0.85 | 2.09  |
| 1.86 | ZC3H18    | 31377595  | conserved nuclear protein NHN1                                                               | Non-cytosolic | 1 | 1.00 | 0.93 | 4.70  | 0.98 | 0.97 | 2.36  |
| 1.85 | LSG1      | 14149720  | large subunit GTPase 1 homolog                                                               | Non-cytosolic | 1 | 0.81 | 0.70 | 2.11  | 0.77 | 0.64 | 2.09  |
| 1.84 | DDX47     | 20149629  | DEAD (Asp-Glu-Ala-Asp) box polypeptide 47 isoform 1                                          | Non-cytosolic | 1 | 0.62 | 0.25 | 2.09  | 0.63 | 0.26 | 2.09  |
| 1.82 | ARL6IP1   | 24308007  | ADP-ribosylation factor-like 6 interacting protein                                           | Non-cytosolic | 1 | 1.01 | 0.93 | 10.76 | 1.01 | 0.92 | 12.82 |
| 1.8  | RAB13     | 4506363   | RAB13, member RAS oncogene family                                                            | Non-cytosolic | 2 | 1.09 | 0.85 | 2.09  | 1.01 | 0.97 | 2.09  |
| 1.79 | GART      | 4503915   | phosphoribosylglycinamide formyltransferasephosphoribosylaminoimidazole synthetase isoform 1 | Non-cytosolic | 1 | 0.69 | 0.53 | 2.11  | 0.90 | 0.85 | 2.09  |
| 1.79 | SAFB2     | 7661936   | scaffold attachment factor B2                                                                | Non-cytosolic | 1 | 0.86 | 0.68 | 2.27  | 0.82 | 0.64 | 2.31  |
| 1.79 | PRMT1     | 38195089  | HMT1 hnRNP methyltransferase-like 2 isoform 1                                                | Non-cytosolic | 1 | 1.14 | 0.78 | 2.09  | 1.00 | 0.99 | 2.09  |
| 1.77 | EVPL      | 4503613   | envoplakin                                                                                   | Non-cytosolic | 0 | 1.64 | 0.42 | 2.11  | 1.41 | 0.54 | 2.09  |
| 1.75 | SNRPA1    | 50593002  | small nuclear ribonucleoprotein polypeptide A'                                               | Non-cytosolic | 1 | 0.88 | 0.78 | 3.56  | 0.78 | 0.65 | 2.11  |
| 1.75 | LOC646578 | 89035220  | PREDICTED: hypothetical protein                                                              | Non-cytosolic | 1 | 0.90 | 0.85 | 2.09  | 0.91 | 0.86 | 2.09  |
| 1.72 | RBBP7     | 4506439   | retinoblastoma binding protein 7                                                             | Non-cytosolic | 1 | 0.90 | 0.84 | 2.09  | 0.89 | 0.82 | 2.09  |
| 1.72 | GLE1      | 51317384  | GLE1-like, RNA export mediator isoform 1                                                     | Non-cytosolic | 1 | 0.70 | 0.73 | 1.92  | 0.86 | 0.87 | 1.98  |
| 1.72 | GTF3C1    | 101943240 | general transcription factor IIIC, polypeptide 1, alpha 220kDa                               | Non-cytosolic | 1 | 0.87 | 0.80 | 2.09  | 0.60 | 0.42 | 2.09  |
| 1.72 | LARS      | 108773810 | leucyl-tRNA synthetase                                                                       | Non-cytosolic | 1 | 1.04 | 0.92 | 2.09  | 1.03 | 0.94 | 2.09  |
| 1.71 | NOC2L     | 7661606   | nucleolar complex associated 2 homolog                                                       | Non-cytosolic | 1 | 0.94 | 0.91 | 2.09  | 0.88 | 0.81 | 2.09  |
| 1.71 | DDX49     | 31542656  | DEAD (Asp-Glu-Ala-Asp) box polypeptide 49                                                    | Non-cytosolic | 1 | 0.56 | 0.39 | 2.11  | 0.55 | 0.37 | 2.11  |
| 1.71 | KIAA1553  | 88999401  | PREDICTED: hypothetical protein LOC57673                                                     | Non-cytosolic | 1 | 1.19 | 0.72 | 1.38  | 1.05 | 0.88 | 1.38  |
| 1.7  | MIF       | 4505185   | macrophage migration inhibitory factor                                                       | Non-cytosolic | 1 | 0.54 | 0.37 | 2.09  | 0.56 | 0.38 | 2.09  |
| 1.7  | CRKL      | 4885153   | v-crk sarcoma virus CT10 oncogene homolog (avian)-like                                       | Non-cytosolic | 1 | 1.27 | 0.64 | 2.09  | 1.27 | 0.64 | 2.09  |
| 1.7  | LASP1     | 5453710   | LIM and SH3 protein 1                                                                        | Non-cytosolic | 1 | 1.82 | 0.36 | 2.09  | 1.67 | 0.41 | 2.09  |



|        |            |           |                                                                                           |               |     |       |      |       |       |      |       |
|--------|------------|-----------|-------------------------------------------------------------------------------------------|---------------|-----|-------|------|-------|-------|------|-------|
| 1.7    | TRAPP2     | 7657548   | trafficking protein particle complex 2                                                    | Non-cytosolic | 1   | 1.03  | 0.94 | 2.09  | 0.90  | 0.83 | 2.09  |
| 1.7    | UTP11L     | 7705809   | UTP11-like, U3 small nucleolar ribonucleoprotein                                          | Non-cytosolic | 1   | 0.86  | 0.79 | 2.09  | 0.86  | 0.77 | 2.09  |
| 1.7    | MRPS36     | 15150811  | mitochondrial ribosomal protein S36                                                       | Non-cytosolic | 1   | 1.17  | 0.74 | 2.09  | 1.27  | 0.64 | 2.09  |
| 1.7    | CLPTM1L    | 21359965  | cisplatin resistance related protein CRR9p                                                | Non-cytosolic | 1   | 0.95  | 0.92 | 2.09  | 1.06  | 0.90 | 2.09  |
| 1.7    | ABR        | 38679957  | active breakpoint cluster region-related protein isoform a                                | Non-cytosolic | 1   | 1.38  | 0.55 | 2.09  | 1.47  | 0.49 | 2.09  |
| 1.7    | ASNA1      | 50428938  | arsA arsenite transporter, ATP-binding, homolog 1                                         | Non-cytosolic | 1   | 0.72  | 0.56 | 2.09  | 0.70  | 0.55 | 2.11  |
| 1.69   | GTF2I      | 14670354  | general transcription factor II, i isoform 3                                              | Non-cytosolic | 1   | 0.72  | 0.56 | 2.09  | 0.83  | 0.73 | 2.09  |
| 1.65   | FLJ40176   | 113424241 | PREDICTED: similar to Intersectin-1 (EH domain and SH3 domain regulator of endocytosis 1) | Non-cytosolic | 1   | 4.13  | 0.16 | 2.23  | 3.31  | 0.18 | 3.16  |
| 1.63   | PBXIP1     | 19923830  | pre-B-cell leukemia transcription factor interacting protein 1                            | Non-cytosolic | 1   | 0.77  | 0.64 | 2.09  | 0.95  | 0.94 | 2.09  |
| 1.63   | GNAS       | 117938759 | GNAS complex locus isoform c                                                              | Non-cytosolic | 2   | 1.28  | 0.63 | 2.09  | 1.04  | 0.93 | 2.09  |
| 1.62   | GALNT2     | 4758412   | polypeptide N-acetylgalactosaminyltransferase 2                                           | Non-cytosolic | 1   | 0.50  | 0.33 | 2.09  | 0.55  | 0.37 | 2.09  |
| 1.62   | TMEM200B   | 51242137  | hypothetical protein LOC399474                                                            | Non-cytosolic | 1   | 0.73  | 0.58 | 2.09  | 0.79  | 0.67 | 2.09  |
| 1.6    | DEK        | 4503249   | DEK oncogene                                                                              | Non-cytosolic | 0   | 0.77  | 0.60 | 1.38  | 0.72  | 0.54 | 1.38  |
| 1.59   | MGA        | 122937388 | MAX dimerization protein 5                                                                | Non-cytosolic | 1   | 0.99  | 1.00 | 2.09  | 0.96  | 0.96 | 2.09  |
| 1.58   | TPP2       | 4507657   | tripeptidyl peptidase II                                                                  | Non-cytosolic | 1   | 0.64  | 0.46 | 2.09  | 0.92  | 0.88 | 2.09  |
| 1.58   | LONRF3     | 73747840  | LON peptidase N-terminal domain and ring finger 3 isoform 1                               | Non-cytosolic | 1   | 0.92  | 0.98 | 4.13  | 0.95  | 0.89 | 2.09  |
| 1.57   | SDHA       | 4759080   | succinate dehydrogenase complex, subunit A, flavoprotein                                  | Non-cytosolic | 1   | 1.15  | 0.77 | 2.09  | 1.20  | 0.71 | 2.09  |
| 1.56   | CYFIP2     | 82617634  | cytoplasmic FMR1 interacting protein 2                                                    | Non-cytosolic | 1   | 1.11  | 0.64 | 2.09  | 1.20  | 0.55 | 2.09  |
| 1.55   | GNL1       | 38788319  | guanine nucleotide binding protein-like 1                                                 | Non-cytosolic | 1   | 1.22  | 0.68 | 2.09  | 1.17  | 0.74 | 2.09  |
| 1.54   | PTRF       | 42734430  | polymerase I and transcript release factor                                                | Non-cytosolic | 1   | 1.29  | 0.62 | 2.09  | 1.33  | 0.59 | 2.09  |
| 1.53   | MAN1B1     | 7706437   | alpha 1,2-mannosidase                                                                     | Non-cytosolic | 1   | 0.94  | 0.91 | 2.09  | 1.17  | 0.75 | 2.09  |
| 1.53   | PRPF38A    | 24762236  | PRP38 pre-mRNA processing factor 38 (yeast) domain containing A isoform 2                 | Non-cytosolic | 1   | 0.69  | 0.52 | 2.11  | 0.61  | 0.44 | 2.09  |
| 1.53   | C10orf58   | 31543191  | hypothetical protein LOC84293                                                             | Non-cytosolic | 1   | 0.91  | 0.87 | 2.09  | 0.88  | 0.81 | 2.09  |
| 1.52   | VPS29      | 7706441   | vacuolar protein sorting 29 isoform 1                                                     | Non-cytosolic | 1   | 0.60  | 0.38 | 1.60  | 0.92  | 0.90 | 1.89  |
| 1.52   | GNB1       | 11321585  | guanine nucleotide-binding protein, beta-1 subunit                                        | Non-cytosolic | 2   | 0.91  | 0.87 | 2.09  | 0.85  | 0.75 | 2.09  |
| 1.52   | ESF1       | 18093112  | ABT1-associated protein                                                                   | Non-cytosolic | 1   | 0.70  | 0.54 | 2.11  | 1.04  | 0.92 | 2.09  |
| 1.52   | GPR107     | 56711308  | G protein-coupled receptor 107                                                            | Non-cytosolic | 1   | 0.90  | 0.51 | 1.38  | 0.95  | 0.52 | 1.72  |
| 1.5    | TRIOBP     | 88501738  | TRIO and F-actin binding protein isoform 6                                                | Non-cytosolic | 0   | 1.41  | 0.53 | 2.09  | 1.39  | 0.54 | 2.09  |
| 1.5    | COL11A1    | 98985810  | alpha 1 type XI collagen isoform B preproprotein                                          | Non-cytosolic | 0   | 6.61  | 0.13 | 2.09  | 6.55  | 0.13 | 2.11  |
| 1.47   | SRP72      | 109638749 | signal recognition particle 72kDa                                                         | Non-cytosolic | 0   | 0.35  | 0.38 | 29.92 | 4.41  | 0.17 | 30.20 |
| 1.46   | SF3A1      | 5032087   | splicing factor 3a, subunit 1, 120kDa isoform 1                                           | Non-cytosolic | 1   | 0.77  | 0.64 | 2.09  | 0.66  | 0.49 | 2.09  |
| 1.44   | TOR1AIP1   | 39753957  | lamina-associated polypeptide 1B                                                          | Non-cytosolic | 1   | 1.17  | 0.74 | 2.09  | 1.21  | 0.69 | 2.09  |
| 1.44   | EIF2A      | 54873624  | eukaryotic translation initiation factor 2A                                               | Non-cytosolic | 0   | 1.01  | 0.88 | 1.53  | 0.99  | 0.98 | 1.56  |
| 1.42   | PSMD13     | 28872728  | proteasome 26S non-ATPase subunit 13 isoform 1                                            | Non-cytosolic | 1   | 1.03  | 0.93 | 2.09  | 1.16  | 0.75 | 2.09  |
| 1.4    | AIMP2      | 11125770  | JTV1                                                                                      | Non-cytosolic | 1   | 0.57  | 0.39 | 2.11  | 0.71  | 0.55 | 2.09  |
| 1.4    | LAS1L      | 13654270  | LAS1-like                                                                                 | Non-cytosolic | 1   | 2.44  | 0.26 | 2.11  | 2.40  | 0.27 | 2.09  |
| 1.4    | TUBA1C     | 14389309  | tubulin alpha 6                                                                           | Non-cytosolic | 9   | 1.04  | 0.92 | 2.09  | 1.18  | 0.73 | 2.09  |
| 1.4    | ETV1       | 31742534  | ets variant gene 1                                                                        | Non-cytosolic | 1   | 14.19 | 0.15 | 1.96  | 13.43 | 0.16 | 2.00  |
| 1.4    | ZNF121     | 56961676  | zinc finger protein 121                                                                   | Non-cytosolic | 1   | 0.77  | 0.64 | 2.11  | 0.70  | 0.55 | 2.11  |
| 1.4    | HIST2H3PS2 | 70608086  | histone H2, H3-like                                                                       | Non-cytosolic | 4   | 2.99  | 0.22 | 2.11  | 3.05  | 0.21 | 2.11  |
| 1.4    | RBM4       | 93277122  | RNA binding motif protein 4                                                               | Non-cytosolic | 1   | 1.09  | 0.85 | 2.09  | 1.02  | 0.97 | 5.60  |
| 1.4    | LOC730288  | 113419590 | PREDICTED: similar to 40S ribosomal protein S28                                           | Non-cytosolic | 1   | 1.20  | 0.68 | 3.40  | 1.24  | 0.68 | 2.91  |
| 1.34   | PTF1A      | 30039710  | pancreas specific transcription factor, 1a                                                | Non-cytosolic | 0   | 1.96  | 0.33 | 2.11  | 1.80  | 0.37 | 2.11  |
| 1.34   | VAV2       | 40549448  | vav 2 oncogene                                                                            | Non-cytosolic | 1   | 0.93  | 0.90 | 2.09  | 1.25  | 0.66 | 2.09  |
| 1.32   | ANK1       | 70780359  | ankyrin 1 isoform 1                                                                       | Non-cytosolic | 0   | 1.85  | 0.29 | 2.09  | 1.84  | 0.29 | 2.09  |
| 1.31   | GFPT1      | 4503981   | glucosamine-fructose-6-phosphate aminotransferase                                         | Non-cytosolic | 0   | 1.21  | 0.70 | 2.11  | 1.06  | 0.90 | 2.09  |
| 1.31   | HNRPDL     | 14110407  | heterogeneous nuclear ribonucleoprotein D-like                                            | Non-cytosolic | 2   | 2.11  | 0.30 | 2.11  | 2.11  | 0.31 | 2.11  |
| 1.31   | PRKAR2B    | 47132585  | cAMP-dependent protein kinase, regulatory subunit beta 2                                  | Non-cytosolic | 1   | 1.16  | 0.76 | 2.11  | 1.39  | 0.54 | 2.09  |
| 1.31   | APBB3      | 95147538  | amyloid beta protein-binding, family B, member 3 isoform d                                | Non-cytosolic | 0   | 2.11  | 0.31 | 2.11  | 2.05  | 0.31 | 2.09  |
| 126.69 | ACTB       | 4501885   | beta actin                                                                                | Whole cell    | 137 | 8.47  | 0.28 | 1.69  | 8.39  | 0.40 | 1.69  |
| 123.44 | HSP90AB1   | 20149594  | heat shock 90kDa protein 1, beta                                                          | Whole cell    | 93  | 3.31  | 0.81 | 1.38  | 3.13  | 0.84 | 1.26  |
| 116.86 | TUBB       | 29788785  | tubulin, beta polypeptide                                                                 | Whole cell    | 79  | 0.98  | 0.42 | 1.15  | 1.04  | 0.75 | 1.14  |
| 111.81 | EF1A1      | 4503471   | eukaryotic translation elongation factor 1 alpha 1                                        | Whole cell    | 66  | 1.79  | 0.73 | 1.11  | 1.39  | 0.87 | 1.09  |
| 100.22 | FLNA       | 116063573 | filamin A, alpha                                                                          | Whole cell    | 49  | 4.74  | 0.00 | 1.56  | 4.88  | 0.00 | 1.53  |
| 94.6   | TUBA1B     | 57013276  | tubulin, alpha, ubiquitous                                                                | Whole cell    | 69  | 0.29  | 0.27 | 1.49  | 0.12  | 0.24 | 1.96  |
| 80.21  | GAPDH      | 7669492   | glyceraldehyde-3-phosphate dehydrogenase                                                  | Whole cell    | 64  | 0.32  | 0.00 | 1.39  | 0.30  | 0.00 | 1.39  |
| 73.28  | VCP        | 6005942   | valosin-containing protein                                                                | Whole cell    | 37  | 2.21  | 0.96 | 1.58  | 1.94  | 0.85 | 1.46  |
| 69.7   | HSPD1      | 41399285  | chaperonin                                                                                | Whole cell    | 46  | 1.79  | 0.18 | 1.32  | 1.43  | 0.17 | 1.29  |
| 68.58  | FASN       | 41872631  | fatty acid synthase                                                                       | Whole cell    | 33  | 0.55  | 0.02 | 1.31  | 0.77  | 0.03 | 1.19  |
| 67.91  | TKT        | 4507521   | transketolase                                                                             | Whole cell    | 45  | 0.69  | 0.79 | 1.15  | 1.42  | 0.86 | 1.16  |
| 67.85  | HSPA8      | 5729877   | heat shock 70kDa protein 8 isoform 1                                                      | Whole cell    | 46  | 3.22  | 0.35 | 1.36  | 3.56  | 0.39 | 1.31  |

|       |           |           |                                                                                    |            |    |       |      |      |       |      |      |
|-------|-----------|-----------|------------------------------------------------------------------------------------|------------|----|-------|------|------|-------|------|------|
| 66.8  | EEF2      | 4503483   | eukaryotic translation elongation factor 2                                         | Whole cell | 40 | 13.80 | 0.01 | 2.61 | 11.48 | 0.03 | 2.33 |
| 60.54 | HSP90AA1  | 63029937  | heat shock protein 90kDa alpha (cytosolic), class A member 1 isoform 1             | Whole cell | 73 | 0.29  | 0.33 | 1.50 | 0.32  | 0.54 | 1.49 |
| 56.89 | PKM2      | 33286418  | pyruvate kinase 3 isoform 1                                                        | Whole cell | 30 | 1.84  | 0.97 | 1.53 | 1.94  | 0.96 | 1.53 |
| 55.1  | PARP1     | 4501955   | poly (ADP-ribose) polymerase family, member 1                                      | Whole cell | 34 | 0.36  | 0.03 | 1.66 | 0.35  | 0.02 | 1.36 |
| 52.01 | FLNC      | 116805322 | gamma filamin                                                                      | Whole cell | 33 | 1.50  | 0.19 | 1.28 | 1.16  | 0.90 | 1.24 |
| 51.73 | SERPINH1  | 32454741  | serine (or cysteine) proteinase inhibitor, clade H, member 1                       | Whole cell | 30 | 1.42  | 0.61 | 1.21 | 1.79  | 0.85 | 1.33 |
| 50.72 | HNRNPA2B1 | 14043072  | heterogeneous nuclear ribonucleoprotein A2/B1 isoform B1                           | Whole cell | 32 | 1.12  | 0.61 | 1.71 | 1.16  | 0.85 | 1.54 |
| 50.11 | HSP90B1   | 4507677   | tumor rejection antigen (gp96) 1                                                   | Whole cell | 31 | 3.19  | 0.37 | 1.38 | 2.23  | 0.39 | 1.37 |
| 47.99 | ATP5B     | 32189394  | ATP synthase, H+ transporting, mitochondrial F1 complex, beta subunit              | Whole cell | 25 | 1.04  | 0.21 | 1.22 | 1.21  | 0.39 | 1.27 |
| 46.72 | KRT8      | 4504919   | keratin 8                                                                          | Whole cell | 25 | 0.16  | 0.00 | 1.82 | 0.09  | 0.00 | 2.33 |
| 46.22 | HNRNPU    | 74136883  | heterogeneous nuclear ribonucleoprotein U isoform a                                | Whole cell | 26 | 1.02  | 0.10 | 1.08 | 1.03  | 0.05 | 1.07 |
| 45.32 | PHGDH     | 23308577  | phosphoglycerate dehydrogenase                                                     | Whole cell | 32 | 0.06  | 0.00 | 1.75 | 0.05  | 0.00 | 2.03 |
| 44.95 | CLTC      | 4758012   | clathrin heavy chain 1                                                             | Whole cell | 23 | 0.44  | 0.07 | 1.36 | 0.48  | 0.22 | 1.46 |
| 44.93 | ALDOA     | 4557305   | aldolase A                                                                         | Whole cell | 27 | 0.36  | 0.31 | 1.67 | 0.45  | 0.23 | 1.53 |
| 44.88 | PDIA3     | 21361657  | protein disulfide isomerase-associated 3                                           | Whole cell | 26 | 2.51  | 0.97 | 1.38 | 2.31  | 0.92 | 1.47 |
| 43.97 | TP1       | 4507645   | triosephosphate isomerase 1                                                        | Whole cell | 33 | 0.50  | 0.48 | 1.31 | 0.48  | 0.48 | 1.53 |
| 43.75 | PGK1      | 4505763   | phosphoglycerate kinase 1                                                          | Whole cell | 29 | 0.52  | 0.86 | 1.39 | 0.55  | 0.94 | 1.32 |
| 43.7  | ENO1      | 4503571   | enolase 1                                                                          | Whole cell | 32 | 1.10  | 0.99 | 1.22 | 0.87  | 0.95 | 1.21 |
| 43.32 | HSPA5     | 16507237  | heat shock 70kDa protein 5                                                         | Whole cell | 28 | 1.91  | 0.60 | 1.47 | 2.86  | 0.10 | 1.71 |
| 42.75 | HNRNPK    | 14165439  | heterogeneous nuclear ribonucleoprotein K isoform a                                | Whole cell | 28 | 0.55  | 0.52 | 1.27 | 0.22  | 0.38 | 1.74 |
| 41.93 | ILF3      | 24234750  | interleukin enhancer binding factor 3 isoform a                                    | Whole cell | 27 | 0.97  | 0.93 | 1.10 | 1.03  | 0.83 | 1.12 |
| 41.06 | PRKDC     | 126032350 | protein kinase, DNA-activated, catalytic polypeptide isoform 2                     | Whole cell | 17 | 0.21  | 0.00 | 2.03 | 0.46  | 0.00 | 1.49 |
| 40.81 | ACTN1     | 4501891   | actinin, alpha 1                                                                   | Whole cell | 19 | 4.17  | 0.31 | 1.96 | 4.29  | 0.30 | 1.92 |
| 40.71 | CCT8      | 48762932  | chaperonin containing TCP1, subunit 8 (theta)                                      | Whole cell | 23 | 0.96  | 0.03 | 1.16 | 1.00  | 0.06 | 1.15 |
| 40.53 | XRCC5     | 10863945  | ATP-dependent DNA helicase II                                                      | Whole cell | 20 | 1.02  | 0.65 | 1.11 | 1.00  | 0.50 | 1.12 |
| 39.84 | NPM1      | 10835063  | nucleophosmin 1 isoform 1                                                          | Whole cell | 32 | 9.20  | 0.69 | 2.86 | 8.55  | 0.49 | 2.68 |
| 39.38 | H2AFX     | 4504253   | H2A histone family, member X                                                       | Whole cell | 28 | 2.49  | 0.10 | 1.77 | 2.56  | 0.10 | 1.80 |
| 39.14 | NASP      | 27262628  | nuclear autoantigenic sperm protein isoform 2                                      | Whole cell | 25 | 2.44  | 0.00 | 1.51 | 1.96  | 0.07 | 1.42 |
| 39.12 | LDHB      | 4557032   | lactate dehydrogenase B                                                            | Whole cell | 42 | 0.15  | 0.00 | 1.63 | 0.20  | 0.00 | 1.64 |
| 37.71 | VIM       | 62414289  | vimentin                                                                           | Whole cell | 23 | 0.91  | 0.26 | 1.15 | 1.34  | 0.30 | 1.18 |
| 37.29 | VCL       | 7669550   | vinculin isoform meta-VCL                                                          | Whole cell | 19 | 10.19 | 0.02 | 2.27 | 10.47 | 0.08 | 2.54 |
| 37.05 | UBA1      | 23510340  | ubiquitin-activating enzyme E1                                                     | Whole cell | 24 | 0.91  | 0.57 | 1.11 | 0.95  | 0.62 | 1.12 |
| 36.79 | MDH2      | 21735621  | mitochondrial malate dehydrogenase                                                 | Whole cell | 19 | 2.49  | 0.05 | 1.80 | 2.33  | 0.10 | 1.66 |
| 36.54 | MYH10     | 41406064  | myosin, heavy polypeptide 10, non-muscle                                           | Whole cell | 20 | 2.94  | 0.15 | 1.60 | 3.53  | 0.10 | 1.64 |
| 35.96 | GANAB     | 88900491  | alpha glucosidase II alpha subunit isoform 3                                       | Whole cell | 19 | 0.91  | 0.57 | 1.16 | 0.90  | 0.46 | 1.15 |
| 35.69 | KRT18     | 4557888   | keratin 18                                                                         | Whole cell | 22 | 0.28  | 0.05 | 1.82 | 0.16  | 0.01 | 2.47 |
| 35.04 | NCL       | 55956788  | nucleolin                                                                          | Whole cell | 17 | 0.54  | 0.27 | 1.45 | 0.70  | 0.43 | 1.31 |
| 34.9  | FLNB      | 105990514 | filamin B, beta (actin binding protein 278)                                        | Whole cell | 21 | 2.63  | 0.10 | 1.82 | 2.99  | 0.03 | 1.79 |
| 34.71 | ATP5A1    | 50345984  | ATP synthase, H+ transporting, mitochondrial F1 complex, alpha subunit             | Whole cell | 20 | 1.04  | 0.86 | 1.29 | 0.97  | 0.85 | 1.29 |
| 34.13 | DYNC1H1   | 33350932  | dynein, cytoplasmic, heavy polypeptide 1                                           | Whole cell | 17 | 1.14  | 0.27 | 1.19 | 1.16  | 0.43 | 1.21 |
| 33.88 | HNRNPA1   | 14043070  | heterogeneous nuclear ribonucleoprotein A1 isoform b                               | Whole cell | 30 | 7.80  | 0.28 | 2.44 | 8.32  | 0.33 | 2.56 |
| 33.82 | FKBP4     | 4503729   | FK506-binding protein 4                                                            | Whole cell | 17 | 0.17  | 0.29 | 2.15 | 0.09  | 0.17 | 2.83 |
| 33.26 | CCT4      | 38455427  | chaperonin containing TCP1, subunit 4 (delta)                                      | Whole cell | 22 | 4.45  | 0.97 | 2.13 | 4.21  | 0.92 | 2.09 |
| 32.49 | EIF4A1    | 4503529   | eukaryotic translation initiation factor 4A isoform 1                              | Whole cell | 18 | 0.70  | 0.79 | 1.37 | 0.65  | 0.68 | 1.38 |
| 32.38 | PDIA4     | 4758304   | protein disulfide isomerase-associated 4                                           | Whole cell | 17 | 1.33  | 0.27 | 1.38 | 0.65  | 0.90 | 1.47 |
| 32.22 | SET       | 4506891   | SET translocation (myeloid leukemia-associated)                                    | Whole cell | 29 | 4.37  | 0.21 | 2.09 | 4.66  | 0.22 | 2.11 |
| 32.21 | XRCC6     | 4503841   | ATP-dependent DNA helicase II, 70 kDa subunit                                      | Whole cell | 15 | 1.03  | 0.99 | 1.15 | 0.99  | 0.49 | 1.15 |
| 31.67 | NME1-NME2 | 66392203  | NME1-NME2 protein                                                                  | Whole cell | 22 | 0.14  | 0.13 | 2.07 | 0.07  | 0.22 | 2.70 |
| 31.41 | PFN1      | 4826898   | profilin 1                                                                         | Whole cell | 23 | 1.49  | 0.87 | 1.27 | 1.89  | 0.96 | 1.38 |
| 30.68 | DHX9      | 100913206 | DEAH (Asp-Glu-Ala-His) box polypeptide 9                                           | Whole cell | 13 | 0.88  | 0.71 | 1.21 | 0.86  | 0.47 | 1.20 |
| 30.4  | P4HB      | 20070125  | prolyl 4-hydroxylase, beta subunit                                                 | Whole cell | 14 | 4.09  | 0.34 | 1.92 | 3.70  | 0.79 | 1.84 |
| 29.95 | PRDX6     | 4758638   | peroxiredoxin 6                                                                    | Whole cell | 25 | 0.44  | 0.52 | 1.36 | 0.43  | 0.65 | 1.54 |
| 29.76 | GSTP1     | 4504183   | glutathione transferase                                                            | Whole cell | 29 | 2.61  | 0.60 | 1.91 | 2.49  | 0.85 | 1.84 |
| 29.76 | TBP1      | 4506243   | polypyrimidine tract-binding protein 1 isoform a                                   | Whole cell | 14 | 0.88  | 0.13 | 1.21 | 0.89  | 0.09 | 1.18 |
| 29.67 | ANXA2     | 50845388  | annexin A2 isoform 1                                                               | Whole cell | 15 | 0.95  | 0.62 | 1.09 | 0.97  | 0.51 | 1.10 |
| 28.92 | CALR      | 4757900   | calreticulin                                                                       | Whole cell | 13 | 0.94  | 0.13 | 1.33 | 0.88  | 0.36 | 1.33 |
| 28.72 | UCHL1     | 21361091  | ubiquitin carboxyl-terminal esterase L1 (ubiquitin thiolesterase)                  | Whole cell | 16 | 2.70  | 0.46 | 1.85 | 2.86  | 0.31 | 1.82 |
| 28.02 | DDX5      | 4758138   | DEAD (Asp-Glu-Ala-Asp) box polypeptide 5                                           | Whole cell | 13 | 0.95  | 0.24 | 1.24 | 0.88  | 0.17 | 1.26 |
| 27.8  | ATIC      | 20127454  | 5-aminoimidazole-4-carboxamide ribonucleotide formyltransferase/IMP cyclohydrolase | Whole cell | 14 | 1.06  | 0.79 | 1.19 | 0.98  | 0.72 | 1.20 |
| 27.26 | MSN       | 4505257   | moesin                                                                             | Whole cell | 13 | 0.36  | 0.72 | 1.71 | 0.61  | 0.70 | 1.45 |
| 27.05 | HSPA9     | 24234688  | heat shock 70kDa protein 9B                                                        | Whole cell | 15 | 2.44  | 0.73 | 1.31 | 2.23  | 0.95 | 1.28 |

|       |           |           |                                                                                          |            |    |       |      |      |       |      |      |
|-------|-----------|-----------|------------------------------------------------------------------------------------------|------------|----|-------|------|------|-------|------|------|
| 26.98 | HSPA4     | 38327039  | heat shock 70kDa protein 4 isoform a                                                     | Whole cell | 13 | 1.42  | 0.27 | 1.42 | 2.03  | 0.03 | 1.60 |
| 26.97 | CCT2      | 5453603   | chaperonin containing TCP1, subunit 2                                                    | Whole cell | 16 | 1.25  | 0.83 | 1.29 | 1.28  | 0.99 | 1.29 |
| 26.54 | PRDX1     | 4505591   | peroxiredoxin 1                                                                          | Whole cell | 12 | 2.36  | 0.94 | 1.58 | 2.31  | 0.92 | 1.58 |
| 26.53 | NONO      | 34932414  | non-POU domain containing, octamer-binding                                               | Whole cell | 18 | 0.37  | 0.96 | 1.80 | 0.30  | 0.38 | 1.92 |
| 26.47 | SPTBN1    | 112382250 | spectrin, beta, non-erythrocytic 1 isoform 1                                             | Whole cell | 13 | 0.96  | 0.98 | 1.24 | 0.98  | 0.88 | 1.25 |
| 26.29 | SLC3A2    | 65506891  | solute carrier family 3, member 2 isoform c                                              | Whole cell | 13 | 2.29  | 0.67 | 1.54 | 4.09  | 0.41 | 1.96 |
| 25.91 | YWHAE     | 5803225   | tyrosine 3/tryptophan 5 -monooxygenase activation protein, epsilon polypeptide           | Whole cell | 16 | 1.11  | 0.74 | 1.51 | 0.82  | 0.74 | 1.38 |
| 25.9  | RPS3      | 15718687  | ribosomal protein S3                                                                     | Whole cell | 14 | 0.32  | 0.50 | 1.64 | 0.28  | 0.46 | 1.92 |
| 25.81 | CCT5      | 24307939  | chaperonin containing TCP1, subunit 5 (epsilon)                                          | Whole cell | 14 | 1.57  | 0.35 | 1.49 | 2.07  | 0.14 | 1.63 |
| 25.55 | PDIAG     | 5031973   | protein disulfide isomerase-associated 6                                                 | Whole cell | 15 | 2.17  | 0.57 | 1.53 | 2.54  | 0.35 | 1.63 |
| 25.53 | FSCN1     | 4507115   | fascin 1                                                                                 | Whole cell | 13 | 0.21  | 0.73 | 1.45 | 0.21  | 0.72 | 1.63 |
| 24.98 | HNRNPM    | 14141152  | heterogeneous nuclear ribonucleoprotein M isoform a                                      | Whole cell | 13 | 0.85  | 0.96 | 1.49 | 0.77  | 0.89 | 1.51 |
| 24.96 | HNRNPC    | 117190254 | heterogeneous nuclear ribonucleoprotein C isoform b                                      | Whole cell | 16 | 0.33  | 0.89 | 1.42 | 0.35  | 0.86 | 1.51 |
| 24.8  | LRPPRC    | 31621305  | leucine-rich PPR motif-containing protein                                                | Whole cell | 10 | 0.33  | 0.01 | 2.09 | 0.68  | 0.02 | 1.53 |
| 24.51 | RPLP0     | 4506667   | ribosomal protein P0                                                                     | Whole cell | 13 | 1.63  | 0.28 | 1.38 | 1.71  | 0.37 | 1.39 |
| 24.48 | MAP4      | 47519639  | microtubule-associated protein 4 isoform 1                                               | Whole cell | 11 | 1.94  | 0.42 | 1.53 | 1.45  | 0.41 | 1.43 |
| 24.44 | MATR3     | 62750354  | matrin 3                                                                                 | Whole cell | 13 | 1.72  | 0.63 | 1.54 | 2.33  | 0.36 | 1.66 |
| 24.44 | LOC643576 | 89036292  | PREDICTED: similar to Phosphoglycerate mutase 1                                          | Whole cell | 15 | 0.97  | 0.69 | 1.19 | 1.03  | 0.63 | 1.17 |
| 23.94 | SPTAN1    | 4507191   | spectrin, alpha, non-erythrocytic 1 (alpha-fodrin)                                       | Whole cell | 12 | 0.99  | 0.78 | 1.17 | 1.06  | 0.49 | 1.16 |
| 23.81 | RPS14     | 68160922  | ribosomal protein S14                                                                    | Whole cell | 14 | 0.56  | 0.29 | 1.60 | 0.45  | 0.16 | 1.51 |
| 23.64 | PCBP2     | 14141166  | poly(rC)-binding protein 2 isoform b                                                     | Whole cell | 11 | 0.93  | 0.01 | 2.19 | 0.90  | 0.01 | 2.19 |
| 23.5  | STIP1     | 5803181   | stress-induced-phosphoprotein 1 (Hsp70/Hsp90-organizing protein)                         | Whole cell | 10 | 0.73  | 0.36 | 1.27 | 0.97  | 1.00 | 1.26 |
| 23.4  | KPNA2     | 4504897   | karyopherin alpha 2                                                                      | Whole cell | 14 | 2.83  | 0.01 | 1.41 | 2.54  | 0.04 | 1.42 |
| 23.05 | TPM1      | 63252896  | tropomyosin 1 alpha chain isoform 3                                                      | Whole cell | 13 | 3.02  | 0.60 | 1.77 | 3.60  | 0.56 | 1.87 |
| 22.86 | KHSRP     | 4504865   | KH-type splicing regulatory protein (FUSE binding protein 2)                             | Whole cell | 12 | 0.17  | 0.01 | 3.31 | 0.21  | 0.11 | 3.10 |
| 22.79 | EF1G      | 4503481   | eukaryotic translation elongation factor 1 gamma                                         | Whole cell | 11 | 0.41  | 0.27 | 1.42 | 0.22  | 0.07 | 1.54 |
| 22.57 | SF3B1     | 54112117  | splicing factor 3b, subunit 1 isoform 1                                                  | Whole cell | 11 | 1.80  | 0.21 | 1.53 | 1.63  | 0.64 | 1.69 |
| 22.54 | LIN28     | 13375938  | lin-28 homolog                                                                           | Whole cell | 14 | 1.14  | 0.20 | 1.27 | 0.97  | 0.31 | 1.27 |
| 22.19 | HIST2H2BF | 66912162  | histone 2, H2bf                                                                          | Whole cell | 21 | 0.29  | 0.30 | 1.49 | 0.20  | 0.44 | 1.57 |
| 22.12 | TLN1      | 16753233  | talin 1                                                                                  | Whole cell | 10 | 1.72  | 0.98 | 1.75 | 2.68  | 0.56 | 1.89 |
| 22.09 | HNRNPH1   | 5031753   | heterogeneous nuclear ribonucleoprotein H1                                               | Whole cell | 13 | 0.42  | 0.10 | 2.11 | 0.19  | 0.04 | 3.60 |
| 21.99 | LOC654188 | 113429184 | PREDICTED: similar to peptidylprolyl isomerase A isoform 1                               | Whole cell | 14 | 0.36  | 0.26 | 1.41 | 0.29  | 0.12 | 1.58 |
| 21.81 | HIST2H4B  | 77539758  | histone cluster 2, H4b                                                                   | Whole cell | 23 | 0.90  | 0.21 | 1.02 | 0.88  | 0.16 | 1.02 |
| 21.76 | GDI2      | 6598323   | GDP dissociation inhibitor 2                                                             | Whole cell | 10 | 1.19  | 0.92 | 1.31 | 1.14  | 0.97 | 1.31 |
| 21.74 | RAN       | 5453555   | ras-related nuclear protein                                                              | Whole cell | 13 | 0.15  | 0.00 | 1.80 | 0.08  | 0.00 | 2.27 |
| 21.71 | CCT3      | 63162572  | chaperonin containing TCP1, subunit 3 isoform a                                          | Whole cell | 10 | 0.98  | 0.99 | 1.12 | 1.02  | 0.69 | 1.14 |
| 21.44 | AHCY      | 9951915   | S-adenosylhomocysteine hydrolase                                                         | Whole cell | 10 | 0.13  | 0.00 | 2.40 | 0.09  | 0.01 | 2.81 |
| 21.16 | CSE1L     | 29029559  | CSE1 chromosome segregation 1-like protein                                               | Whole cell | 11 | 0.26  | 0.10 | 2.13 | 0.42  | 0.13 | 1.72 |
| 21.09 | RPN1      | 4506675   | ribophorin 1                                                                             | Whole cell | 11 | 0.90  | 0.78 | 1.32 | 0.95  | 0.99 | 1.29 |
| 21.03 | GART      | 4503915   | phosphoribosylglycinamide formyltransferase                                              | Whole cell | 9  | 0.77  | 0.15 | 1.46 | 0.77  | 0.39 | 1.47 |
| 20.94 | SLC25A5   | 4502099   | solute carrier family 25, member 5                                                       | Whole cell | 11 | 0.15  | 0.05 | 2.86 | 0.36  | 0.10 | 1.69 |
| 20.62 | LOC653604 | 88943485  | PREDICTED: similar to H3 histone, family 2 isoform 2                                     | Whole cell | 10 | 0.15  | 0.11 | 1.53 | 0.07  | 0.14 | 1.50 |
| 20.57 | YWHAZ     | 4507953   | tyrosine 3/tryptophan 5 -monooxygenase activation protein, zeta polypeptide              | Whole cell | 16 | 3.28  | 0.43 | 1.38 | 3.56  | 0.29 | 1.39 |
| 20.55 | NES       | 38176300  | nestin                                                                                   | Whole cell | 9  | 3.94  | 0.03 | 1.61 | 5.30  | 0.00 | 1.67 |
| 20.46 | SNRNP200  | 40217847  | activating signal cointegrator 1 complex subunit 3-like 1                                | Whole cell | 9  | 0.44  | 0.04 | 1.64 | 0.37  | 0.00 | 1.67 |
| 20.38 | RPLP2     | 4506671   | ribosomal protein P2                                                                     | Whole cell | 14 | 3.28  | 0.38 | 1.72 | 4.57  | 0.62 | 1.94 |
| 20.33 | ACTC1     | 4885049   | cardiac muscle alpha actin 1 proprotein                                                  | Whole cell | 54 | 32.81 | 0.10 | 2.15 | 33.42 | 0.10 | 2.17 |
| 20.32 | IGFBP3    | 30795212  | insulin-like growth factor 2 mRNA binding protein 3                                      | Whole cell | 12 | 0.92  | 0.50 | 1.89 | 1.02  | 0.78 | 1.92 |
| 20.1  | RPS13     | 4506685   | ribosomal protein S13                                                                    | Whole cell | 11 | 2.31  | 0.50 | 1.64 | 2.25  | 0.26 | 1.66 |
| 19.97 | SFPQ      | 4826998   | splicing factor proline/glutamine rich (polypyrimidine tract binding protein associated) | Whole cell | 10 | 1.17  | 0.89 | 1.38 | 1.14  | 0.96 | 1.37 |
| 19.95 | CAD       | 18105007  | carbamoylphosphate synthetase 2/aspartate transcarbamylase/dihydroorotase                | Whole cell | 9  | 0.86  | 0.63 | 2.09 | 0.97  | 0.93 | 1.82 |
| 19.76 | RPL6      | 67189747  | ribosomal protein L6                                                                     | Whole cell | 11 | 0.94  | 0.33 | 1.19 | 0.94  | 0.32 | 1.19 |
| 19.74 | RPL27     | 4506623   | ribosomal protein L27                                                                    | Whole cell | 11 | 0.27  | 0.73 | 2.21 | 0.18  | 0.36 | 2.09 |
| 19.72 | TRIM28    | 5032179   | tripartite motif-containing 28 protein                                                   | Whole cell | 11 | 1.85  | 0.64 | 1.72 | 2.63  | 0.74 | 1.96 |
| 19.66 | IDH1      | 28178825  | isocitrate dehydrogenase 1 (NADP+), soluble                                              | Whole cell | 9  | 1.36  | 0.20 | 1.41 | 1.74  | 0.08 | 1.50 |
| 19.51 | PPP2R1A   | 21361399  | alpha isoform of regulatory subunit A, protein phosphatase 2                             | Whole cell | 9  | 3.10  | 0.65 | 1.67 | 4.37  | 0.40 | 1.91 |
| 19.46 | ILF2      | 24234747  | interleukin enhancer binding factor 2                                                    | Whole cell | 9  | 0.84  | 0.17 | 1.38 | 0.81  | 0.08 | 1.41 |
| 19.41 | KPNB1     | 19923142  | karyopherin beta 1                                                                       | Whole cell | 10 | 0.98  | 0.61 | 1.31 | 0.86  | 0.84 | 1.38 |
| 19.24 | HNRNPR    | 5031755   | heterogeneous nuclear ribonucleoprotein R                                                | Whole cell | 9  | 0.43  | 0.21 | 1.74 | 0.44  | 0.42 | 1.71 |
| 19.23 | DDX39     | 21040371  | DEAD (Asp-Glu-Ala-Asp) box polypeptide 39                                                | Whole cell | 10 | 0.97  | 0.59 | 1.64 | 0.76  | 0.13 | 1.75 |
| 19.06 | ANXA5     | 4502107   | annexin 5                                                                                | Whole cell | 10 | 3.02  | 0.96 | 2.09 | 3.56  | 0.89 | 2.21 |

|       |           |           |                                                                              |            |    |       |      |      |       |      |      |
|-------|-----------|-----------|------------------------------------------------------------------------------|------------|----|-------|------|------|-------|------|------|
| 18.95 | HNRNPL    | 52632383  | heterogeneous nuclear ribonucleoprotein L isoform a                          | Whole cell | 9  | 0.86  | 0.59 | 1.26 | 0.89  | 0.70 | 1.26 |
| 18.86 | HYOU1     | 5453832   | oxygen regulated protein                                                     | Whole cell | 8  | 2.21  | 0.07 | 1.58 | 1.92  | 0.15 | 1.54 |
| 18.83 | YBX1      | 34098946  | nuclease sensitive element binding protein 1                                 | Whole cell | 12 | 16.00 | 0.02 | 2.81 | 18.54 | 0.01 | 2.91 |
| 18.61 | PSAT1     | 17402893  | phosphoserine aminotransferase isoform 1                                     | Whole cell | 9  | 0.58  | 0.07 | 1.43 | 0.48  | 0.04 | 1.60 |
| 18.55 | AARS      | 109148542 | alanyl-tRNA synthetase                                                       | Whole cell | 9  | 2.47  | 0.20 | 1.71 | 2.27  | 0.72 | 1.64 |
| 18.07 | ANXA1     | 4502101   | annexin I                                                                    | Whole cell | 9  | 10.86 | 0.00 | 2.15 | 12.47 | 0.00 | 2.11 |
| 18    | DDB1      | 13435359  | damage-specific DNA binding protein 1                                        | Whole cell | 8  | 0.33  | 0.58 | 1.67 | 0.27  | 0.46 | 1.61 |
| 17.97 | ANXA6     | 71773415  | annexin VI isoform 2                                                         | Whole cell | 9  | 2.29  | 0.88 | 1.47 | 2.42  | 0.99 | 1.45 |
| 17.84 | RPS2      | 15055539  | ribosomal protein S2                                                         | Whole cell | 8  | 0.99  | 0.90 | 1.08 | 0.99  | 0.96 | 1.08 |
| 17.82 | PABPC1    | 46367787  | poly(A) binding protein, cytoplasmic 1                                       | Whole cell | 8  | 0.14  | 0.09 | 3.22 | 0.28  | 0.32 | 2.51 |
| 17.8  | NAP1L1    | 4758756   | nucleosome assembly protein 1-like 1                                         | Whole cell | 13 | 1.15  | 0.26 | 1.25 | 1.19  | 0.34 | 1.27 |
| 17.77 | GARS      | 116805340 | glycyl-tRNA synthetase                                                       | Whole cell | 10 | 0.89  | 0.42 | 1.28 | 0.88  | 0.26 | 1.28 |
| 17.59 | DHX15     | 68509926  | DEAH (Asp-Glu-Ala-His) box polypeptide 15                                    | Whole cell | 8  | 0.44  | 0.48 | 1.67 | 0.53  | 0.79 | 1.54 |
| 17.48 | MTHFD1    | 13699868  | methylenetetrahydrofolate dehydrogenase 1                                    | Whole cell | 7  | 1.94  | 0.25 | 1.66 | 1.85  | 0.48 | 1.60 |
| 17.42 | RPL7      | 15431301  | ribosomal protein L7                                                         | Whole cell | 11 | 1.15  | 0.53 | 1.25 | 1.07  | 0.56 | 1.19 |
| 17.18 | RPS27A    | 4506713   | ubiquitin and ribosomal protein S27a                                         | Whole cell | 9  | 1.14  | 0.58 | 1.11 | 1.14  | 0.63 | 1.14 |
| 17.13 | RPS4X     | 4506725   | ribosomal protein S4, X-linked X isoform                                     | Whole cell | 9  | 0.26  | 0.88 | 1.43 | 0.35  | 0.75 | 1.50 |
| 16.91 | CALD1     | 15149465  | caldesmon 1 isoform 5                                                        | Whole cell | 8  | 8.71  | 0.00 | 2.31 | 9.29  | 0.00 | 2.27 |
| 16.73 | GFPT1     | 4503981   | glucosamine-fructose-6-phosphate aminotransferase                            | Whole cell | 7  | 0.42  | 0.08 | 1.72 | 0.40  | 0.07 | 1.72 |
| 16.73 | PHB       | 4505773   | prohibitin                                                                   | Whole cell | 8  | 1.02  | 0.52 | 1.28 | 1.06  | 0.43 | 1.27 |
| 16.71 | EIF4G1    | 38201623  | eukaryotic translation initiation factor 4 gamma, 1 isoform 1                | Whole cell | 7  | 0.52  | 0.73 | 1.87 | 0.30  | 0.83 | 2.51 |
| 16.33 | RBBP4     | 5032027   | retinoblastoma binding protein 4                                             | Whole cell | 8  | 3.16  | 0.23 | 2.61 | 4.61  | 0.17 | 2.00 |
| 16.3  | CAP1      | 5453595   | adenylyl cyclase-associated protein                                          | Whole cell | 9  | 1.64  | 0.25 | 1.64 | 2.36  | 0.10 | 2.03 |
| 16.3  | SF3B2     | 55749531  | splicing factor 3B subunit 2                                                 | Whole cell | 7  | 2.61  | 0.85 | 1.75 | 3.10  | 0.81 | 1.91 |
| 16.25 | IMPDH2    | 66933016  | inosine monophosphate dehydrogenase 2                                        | Whole cell | 9  | 1.12  | 0.63 | 1.31 | 1.17  | 0.85 | 1.42 |
| 16.19 | HSPA1A    | 5123454   | heat shock 70kDa protein 1A                                                  | Whole cell | 20 | 0.25  | 0.66 | 1.71 | 0.37  | 0.96 | 1.51 |
| 16.14 | LOC143244 | 89031353  | PREDICTED: similar to eukaryotic translation initiation factor 5A            | Whole cell | 12 | 0.19  | 0.67 | 1.89 | 0.19  | 0.62 | 1.82 |
| 16.05 | SDN1      | 77404397  | staphylococcal nuclease domain containing 1                                  | Whole cell | 10 | 1.45  | 0.34 | 1.54 | 1.45  | 0.49 | 1.56 |
| 16.04 | CALM1     | 5901912   | calmodulin 1                                                                 | Whole cell | 10 | 7.18  | 0.01 | 2.61 | 7.11  | 0.01 | 2.61 |
| 16.02 | ANP32B    | 5454088   | acidic (leucine-rich) nuclear phosphoprotein 32 family, member B             | Whole cell | 8  | 0.52  | 0.82 | 1.67 | 0.35  | 0.41 | 1.82 |
| 15.83 | TUFM      | 34147630  | Tu translation elongation factor, mitochondrial                              | Whole cell | 7  | 1.07  | 0.93 | 1.36 | 1.12  | 0.95 | 1.28 |
| 15.7  | ATP1A1    | 21361181  | Na <sup>+</sup> /K <sup>+</sup> -ATPase alpha 1 subunit isoform a proprotein | Whole cell | 8  | 0.87  | 0.24 | 1.31 | 0.86  | 0.18 | 1.28 |
| 15.57 | DDX17     | 38201710  | DEAD box polypeptide 17 isoform p82                                          | Whole cell | 14 | 0.08  | 0.00 | 2.31 | 0.16  | 0.00 | 1.89 |
| 15.52 | RPL10     | 5174431   | ribosomal protein L10                                                        | Whole cell | 8  | 2.23  | 0.29 | 1.71 | 1.98  | 0.27 | 2.09 |
| 15.37 | CAND1     | 21361794  | TIP120 protein                                                               | Whole cell | 7  | 1.09  | 0.68 | 1.36 | 1.03  | 0.20 | 1.41 |
| 15.25 | PRDX2     | 32189392  | peroxiredoxin 2 isoform a                                                    | Whole cell | 10 | 0.52  | 0.41 | 1.64 | 0.44  | 0.24 | 1.79 |
| 15.13 | PEBP1     | 4505621   | prostatic binding protein                                                    | Whole cell | 7  | 0.82  | 0.35 | 1.56 | 0.32  | 0.13 | 2.31 |
| 15.02 | MYH9      | 12667788  | myosin, heavy polypeptide 9, non-muscle                                      | Whole cell | 14 | 0.95  | 0.26 | 1.12 | 0.94  | 0.25 | 1.12 |
| 14.9  | PPIB      | 4758950   | peptidylprolyl isomerase B                                                   | Whole cell | 6  | 0.34  | 0.38 | 1.74 | 0.28  | 0.33 | 1.96 |
| 14.8  | ACTN4     | 12025678  | actinin, alpha 4                                                             | Whole cell | 12 | 6.19  | 0.00 | 2.33 | 7.87  | 0.00 | 2.88 |
| 14.76 | EPRS      | 62241042  | glutamyl-prolyl tRNA synthetase                                              | Whole cell | 6  | 0.87  | 0.64 | 1.94 | 0.72  | 0.19 | 1.63 |
| 14.73 | GNB2L1    | 5174447   | guanine nucleotide binding protein (G protein), beta polypeptide 2-like 1    | Whole cell | 8  | 0.11  | 0.18 | 2.86 | 0.34  | 0.33 | 1.82 |
| 14.68 | G3BP1     | 5031703   | Ras-GTPase-activating protein SH3-domain-binding protein                     | Whole cell | 7  | 0.70  | 0.88 | 1.56 | 0.72  | 0.45 | 1.61 |
| 14.65 | RPL4      | 16579885  | ribosomal protein L4                                                         | Whole cell | 6  | 0.29  | 0.98 | 1.69 | 0.30  | 0.87 | 1.69 |
| 14.59 | HIST1H1C  | 4885375   | histone cluster 1, H1c                                                       | Whole cell | 8  | 0.16  | 0.13 | 2.11 | 0.10  | 0.11 | 2.11 |
| 14.57 | EIF4A3    | 7661920   | eukaryotic translation initiation factor 4A, isoform 3                       | Whole cell | 8  | 1.09  | 0.57 | 1.14 | 1.05  | 0.81 | 1.20 |
| 14.51 | TPM3      | 114155144 | tropomyosin 3 isoform 4                                                      | Whole cell | 10 | 1.15  | 0.35 | 1.42 | 1.24  | 0.61 | 1.41 |
| 14.48 | RPL5      | 14591909  | ribosomal protein L5                                                         | Whole cell | 7  | 1.60  | 0.44 | 1.42 | 1.72  | 0.41 | 1.43 |
| 14.46 | PAICS     | 5453539   | phosphoribosylaminoimidazole carboxylase, 2                                  | Whole cell | 7  | 0.98  | 0.68 | 1.87 | 1.09  | 0.79 | 1.72 |
| 14.42 | CCT6A     | 4502643   | chaperonin containing TCP1, subunit 6A isoform a                             | Whole cell | 6  | 0.79  | 0.66 | 1.79 | 0.75  | 0.46 | 1.77 |
| 14.38 | MAT2A     | 5174529   | methionine adenosyltransferase II, alpha                                     | Whole cell | 7  | 0.82  | 0.60 | 1.67 | 1.00  | 0.82 | 1.67 |
| 14.35 | RPL13     | 15431297  | ribosomal protein L13                                                        | Whole cell | 9  | 0.35  | 0.62 | 1.69 | 0.20  | 0.58 | 2.07 |
| 14.33 | DBN1      | 18426915  | drebrin 1 isoform a                                                          | Whole cell | 9  | 9.12  | 0.14 | 3.22 | 8.79  | 0.16 | 3.13 |
| 14.31 | CKB       | 21536286  | brain creatine kinase                                                        | Whole cell | 9  | 1.24  | 0.58 | 1.58 | 1.25  | 0.53 | 1.54 |
| 14.26 | ADAR      | 70166852  | adenosine deaminase, RNA-specific isoform a                                  | Whole cell | 7  | 0.63  | 0.14 | 1.38 | 0.76  | 0.32 | 1.38 |
| 14.17 | SERBP1    | 66346683  | SERPINE1 mRNA binding protein 1 isoform 3                                    | Whole cell | 8  | 8.02  | 0.00 | 2.58 | 8.09  | 0.00 | 2.56 |
| 14.08 | XPO1      | 4507943   | exportin 1                                                                   | Whole cell | 7  | 0.99  | 0.93 | 1.75 | 0.91  | 0.76 | 1.39 |
| 14.07 | FUBP1     | 17402900  | far upstream element-binding protein                                         | Whole cell | 6  | 0.60  | 0.42 | 2.09 | 0.44  | 0.28 | 2.09 |
| 14.03 | BCAT1     | 38176287  | branched chain aminotransferase 1, cytosolic                                 | Whole cell | 8  | 1.79  | 0.82 | 2.13 | 1.14  | 0.98 | 2.11 |
| 13.87 | GMPS      | 4504035   | guanine monophosphate synthetase                                             | Whole cell | 7  | 0.41  | 0.08 | 1.58 | 0.30  | 0.05 | 2.07 |
| 13.85 | LOC387867 | 89036252  | PREDICTED: similar to 40S ribosomal protein SA                               | Whole cell | 11 | 4.41  | 0.84 | 1.72 | 4.21  | 0.69 | 1.69 |

|       |          |           |                                                                     |            |    |       |      |      |      |      |      |
|-------|----------|-----------|---------------------------------------------------------------------|------------|----|-------|------|------|------|------|------|
| 13.84 | TCP1     | 57863257  | T-complex protein 1 isoform a                                       | Whole cell | 7  | 0.47  | 0.35 | 1.84 | 0.22 | 0.02 | 2.49 |
| 13.77 | HSPE1    | 4504523   | heat shock 10kDa protein 1 (chaperonin 10)                          | Whole cell | 6  | 0.08  | 0.43 | 2.83 | 0.07 | 0.55 | 2.94 |
| 13.71 | PARK7    | 31543380  | DJ-1 protein                                                        | Whole cell | 9  | 1.08  | 0.52 | 1.22 | 1.10 | 0.51 | 1.21 |
| 13.62 | HNRNPA3  | 34740329  | heterogeneous nuclear ribonucleoprotein A3                          | Whole cell | 17 | 4.06  | 0.32 | 1.96 | 4.57 | 0.39 | 2.03 |
| 13.57 | IQGAP1   | 4506787   | IQ motif containing GTPase activating protein 1                     | Whole cell | 6  | 2.05  | 0.39 | 1.74 | 1.43 | 0.86 | 1.61 |
| 13.54 | PSMA1    | 23110935  | proteasome alpha 1 subunit isoform 1                                | Whole cell | 7  | 0.77  | 0.67 | 1.49 | 0.74 | 0.64 | 1.47 |
| 13.44 | API5     | 5729730   | apoptosis inhibitor 5                                               | Whole cell | 7  | 1.02  | 0.60 | 1.20 | 1.07 | 0.78 | 1.29 |
| 13.33 | HMGB1    | 4504425   | high-mobility group box 1                                           | Whole cell | 8  | 1.60  | 0.69 | 1.37 | 1.94 | 0.96 | 1.50 |
| 13.31 | DARS     | 45439306  | aspartyl-tRNA synthetase                                            | Whole cell | 6  | 0.81  | 0.13 | 1.45 | 0.79 | 0.04 | 1.45 |
| 13.25 | TOP2A    | 19913406  | DNA topoisomerase II, alpha isozyme                                 | Whole cell | 6  | 0.95  | 0.94 | 2.09 | 1.20 | 0.70 | 2.09 |
| 13.14 | YARS     | 4507947   | tyrosyl-tRNA synthetase                                             | Whole cell | 6  | 0.50  | 0.21 | 1.63 | 0.75 | 0.26 | 1.41 |
| 13.12 | HIST1H1B | 4885381   | histone cluster 1, H1b                                              | Whole cell | 10 | 0.95  | 0.49 | 1.12 | 0.97 | 0.54 | 1.12 |
| 13.11 | ELAVL1   | 38201714  | ELAV-like 1                                                         | Whole cell | 5  | 0.63  | 0.56 | 1.69 | 0.71 | 0.53 | 1.69 |
| 13.1  | SSB      | 10835067  | autoantigen La                                                      | Whole cell | 6  | 1.39  | 0.71 | 1.69 | 1.85 | 0.38 | 1.89 |
| 13.09 | CLIC1    | 14251209  | chloride intracellular channel 1                                    | Whole cell | 6  | 0.82  | 0.92 | 1.47 | 1.02 | 0.65 | 1.47 |
| 13.06 | RPS3A    | 4506723   | ribosomal protein S3a                                               | Whole cell | 7  | 0.28  | 0.15 | 1.67 | 0.18 | 0.27 | 2.33 |
| 13    | HINT1    | 4885413   | histidine triad nucleotide binding protein 1                        | Whole cell | 7  | 5.70  | 0.13 | 1.53 | 5.86 | 0.13 | 1.42 |
| 12.91 | HSPB1    | 4504517   | heat shock 27kDa protein 1                                          | Whole cell | 10 | 0.06  | 0.01 | 3.13 | 0.09 | 0.07 | 2.61 |
| 12.9  | M6PRBP1  | 20127486  | mannose 6 phosphate receptor binding protein 1                      | Whole cell | 6  | 1.10  | 0.68 | 1.46 | 1.03 | 0.44 | 1.38 |
| 12.81 | RPS19    | 4506695   | ribosomal protein S19                                               | Whole cell | 6  | 0.99  | 0.64 | 1.36 | 1.07 | 0.45 | 1.38 |
| 12.76 | PSMD11   | 28872725  | proteasome 26S non-ATPase subunit 11                                | Whole cell | 6  | 0.64  | 0.88 | 1.63 | 0.58 | 0.70 | 1.66 |
| 12.76 | CANX     | 66933005  | calnexin                                                            | Whole cell | 8  | 3.77  | 0.13 | 2.03 | 3.94 | 0.17 | 2.03 |
| 12.75 | DPYSL2   | 4503377   | dihydropyrimidinase-like 2                                          | Whole cell | 9  | 0.30  | 0.34 | 1.96 | 0.19 | 0.39 | 2.42 |
| 12.7  | RPS10    | 4506679   | ribosomal protein S10                                               | Whole cell | 8  | 5.81  | 0.92 | 2.17 | 5.55 | 0.99 | 2.13 |
| 12.6  | FUS      | 4826734   | fusion (involved in t(12;16) in malignant liposarcoma) isoform a    | Whole cell | 6  | 1.12  | 0.00 | 2.11 | 0.86 | 0.01 | 2.15 |
| 12.58 | COPA     | 4758030   | coatomer protein complex, subunit alpha                             | Whole cell | 6  | 0.51  | 0.75 | 2.03 | 0.52 | 0.54 | 2.00 |
| 12.53 | PRPF8    | 91208426  | U5 snRNP-specific protein                                           | Whole cell | 6  | 0.79  | 0.59 | 2.73 | 0.70 | 0.36 | 2.40 |
| 12.44 | CNDP2    | 8922699   | CNDP dipeptidase 2 (metallopeptidase M20 family)                    | Whole cell | 6  | 4.06  | 0.54 | 2.00 | 3.60 | 0.77 | 1.94 |
| 12.43 | TMP0     | 73760405  | thymopoietin isoform beta                                           | Whole cell | 8  | 1.56  | 0.40 | 1.61 | 1.16 | 0.72 | 1.53 |
| 12.41 | RPL7A    | 4506661   | ribosomal protein L7a                                               | Whole cell | 6  | 0.54  | 0.07 | 1.51 | 0.29 | 0.01 | 2.51 |
| 12.37 | EIF3C    | 83700233  | eukaryotic translation initiation factor 3, subunit 8, 110kDa       | Whole cell | 6  | 0.97  | 0.65 | 1.29 | 1.17 | 0.87 | 1.32 |
| 12.25 | DPYSL3   | 4503379   | dihydropyrimidinase-like 3                                          | Whole cell | 6  | 0.98  | 0.98 | 2.15 | 0.90 | 0.77 | 1.85 |
| 12.22 | BSG      | 38372925  | basigin isoform 2                                                   | Whole cell | 6  | 0.82  | 0.97 | 4.45 | 0.83 | 0.88 | 4.45 |
| 12.2  | RPS20    | 4506697   | ribosomal protein S20                                               | Whole cell | 6  | 2.23  | 0.81 | 1.38 | 2.27 | 0.88 | 1.37 |
| 12.18 | CCT7     | 5453607   | chaperonin containing TCP1, subunit 7 isoform a                     | Whole cell | 7  | 3.80  | 0.91 | 2.65 | 3.40 | 0.93 | 2.33 |
| 12.14 | HDGF     | 4758516   | hepatoma-derived growth factor (high-mobility group protein 1-like) | Whole cell | 7  | 0.93  | 0.84 | 1.87 | 1.25 | 0.55 | 1.72 |
| 12.14 | RPL10A   | 15431288  | ribosomal protein L10a                                              | Whole cell | 12 | 1.98  | 0.45 | 1.89 | 1.94 | 0.55 | 1.89 |
| 12.09 | KHDRBS1  | 5730027   | KH domain containing, RNA binding, signal transduction associated 1 | Whole cell | 7  | 10.57 | 0.19 | 3.05 | 9.12 | 0.23 | 2.78 |
| 12.07 | IDH2     | 28178832  | isocitrate dehydrogenase 2 (NADP+), mitochondrial                   | Whole cell | 9  | 0.18  | 0.00 | 2.31 | 0.17 | 0.09 | 2.40 |
| 12.01 | RPS8     | 4506743   | ribosomal protein S8                                                | Whole cell | 5  | 0.90  | 0.25 | 1.20 | 0.86 | 0.33 | 1.19 |
| 11.96 | TAGLN2   | 4507357   | transgelin 2                                                        | Whole cell | 6  | 1.11  | 0.75 | 1.56 | 0.88 | 0.97 | 1.54 |
| 11.83 | RPL12    | 4506597   | ribosomal protein L12                                               | Whole cell | 6  | 1.09  | 0.16 | 1.15 | 1.03 | 0.52 | 1.16 |
| 11.77 | EEF1D    | 25453474  | eukaryotic translation elongation factor 1 delta isoform 1          | Whole cell | 5  | 0.95  | 0.88 | 2.19 | 1.16 | 0.63 | 2.19 |
| 11.69 | RPS15A   | 71772415  | ribosomal protein S15a                                              | Whole cell | 4  | 0.63  | 0.25 | 1.46 | 0.68 | 0.40 | 2.25 |
| 11.59 | SYNCRIP  | 23397427  | synaptotagmin binding, cytoplasmic RNA interacting protein          | Whole cell | 7  | 3.31  | 0.12 | 1.98 | 3.22 | 0.16 | 1.96 |
| 11.39 | RPN2     | 35493916  | ribophorin II                                                       | Whole cell | 5  | 1.09  | 0.52 | 2.00 | 1.19 | 0.43 | 2.19 |
| 11.34 | RPL23A   | 17105394  | ribosomal protein L23a                                              | Whole cell | 5  | 1.34  | 0.03 | 1.28 | 1.32 | 0.11 | 1.31 |
| 11.33 | RPS16    | 4506691   | ribosomal protein S16                                               | Whole cell | 5  | 1.02  | 0.77 | 1.53 | 0.77 | 0.53 | 1.64 |
| 11.29 | 9-Sep    | 116256489 | septin 9                                                            | Whole cell | 4  | 0.88  | 0.34 | 1.26 | 0.88 | 0.26 | 1.28 |
| 11.27 | EFTUD2   | 41152056  | U5 snRNP-specific protein, 116 kD                                   | Whole cell | 6  | 0.27  | 0.02 | 2.23 | 0.60 | 0.57 | 1.96 |
| 11.23 | RPL3     | 4506649   | ribosomal protein L3 isoform a                                      | Whole cell | 4  | 1.41  | 0.68 | 1.56 | 1.47 | 0.68 | 1.72 |
| 11.15 | DNMT3B   | 5901940   | DNA cytosine-5 methyltransferase 3 beta isoform 1                   | Whole cell | 6  | 3.25  | 0.28 | 1.72 | 3.53 | 0.26 | 1.54 |
| 11.14 | PLS3     | 7549809   | plastin 3                                                           | Whole cell | 6  | 1.01  | 0.42 | 2.73 | 1.00 | 0.34 | 2.73 |
| 11.14 | MGST1    | 9945306   | microsomal glutathione S-transferase 1                              | Whole cell | 6  | 0.44  | 0.28 | 2.11 | 0.43 | 0.27 | 2.49 |
| 11.11 | IARS     | 94721241  | isoleucine-tRNA synthetase                                          | Whole cell | 6  | 1.16  | 0.41 | 1.24 | 1.16 | 0.72 | 1.28 |
| 10.99 | FBL      | 12056465  | fibrillarin                                                         | Whole cell | 5  | 0.92  | 0.79 | 1.16 | 0.95 | 0.90 | 1.19 |
| 10.99 | EZR      | 21614499  | villin 2                                                            | Whole cell | 9  | 1.08  | 0.82 | 1.56 | 1.15 | 0.96 | 1.54 |
| 10.9  | NARS     | 4758762   | asparaginyl-tRNA synthetase                                         | Whole cell | 6  | 0.91  | 0.75 | 1.27 | 0.86 | 0.57 | 1.22 |
| 10.84 | IGF2BP1  | 56237027  | insulin-like growth factor 2 mRNA binding protein 1                 | Whole cell | 10 | 0.99  | 0.95 | 1.26 | 0.99 | 0.99 | 1.31 |
| 10.83 | PPP1CC   | 4506007   | protein phosphatase 1, catalytic subunit, gamma isoform             | Whole cell | 5  | 1.12  | 0.86 | 1.20 | 1.10 | 0.73 | 1.21 |
| 10.67 | ENO2     | 5803011   | enolase 2                                                           | Whole cell | 6  | 0.72  | 0.65 | 1.53 | 0.37 | 0.45 | 1.57 |

|       |           |           |                                                                               |            |    |      |      |       |      |      |       |
|-------|-----------|-----------|-------------------------------------------------------------------------------|------------|----|------|------|-------|------|------|-------|
| 10.66 | MARS      | 14043022  | methionine-tRNA synthetase                                                    | Whole cell | 5  | 0.98 | 0.98 | 1.64  | 0.87 | 0.98 | 1.58  |
| 10.63 | DNM1L     | 6996005   | dynamitin 1-like protein isoform 1                                            | Whole cell | 5  | 1.04 | 0.80 | 1.28  | 0.98 | 0.70 | 1.26  |
| 10.62 | GCN11     | 54607053  | GCN1 general control of amino-acid synthesis 1-like 1                         | Whole cell | 5  | 1.01 | 0.89 | 1.75  | 1.05 | 0.79 | 1.89  |
| 10.59 | SFRS1     | 5902076   | splicing factor, arginine/serine-rich 1 isoform 1                             | Whole cell | 6  | 1.57 | 0.72 | 1.66  | 1.69 | 0.67 | 1.69  |
| 10.59 | PGD       | 40068518  | phosphogluconate dehydrogenase                                                | Whole cell | 5  | 3.37 | 0.23 | 1.87  | 3.16 | 0.25 | 1.84  |
| 10.57 | UGP2      | 48255966  | UDP-glucose pyrophosphorylase 2 isoform a                                     | Whole cell | 4  | 5.35 | 0.01 | 1.56  | 5.40 | 0.50 | 1.67  |
| 10.55 | EIF4A2    | 83700235  | eukaryotic translation initiation factor 4A2                                  | Whole cell | 13 | 0.28 | 0.28 | 1.42  | 0.33 | 0.31 | 1.34  |
| 10.51 | VARS      | 5454158   | valyl-tRNA synthetase                                                         | Whole cell | 5  | 1.67 | 0.03 | 1.31  | 1.94 | 0.05 | 1.80  |
| 10.45 | LRRC47    | 24308207  | leucine rich repeat containing 47                                             | Whole cell | 5  | 1.04 | 0.57 | 1.20  | 1.06 | 0.74 | 1.22  |
| 10.43 | PSMC2     | 4506209   | proteasome 26S ATPase subunit 2                                               | Whole cell | 6  | 1.45 | 0.48 | 1.61  | 2.25 | 0.33 | 1.87  |
| 10.43 | GTF2I     | 14670354  | general transcription factor II, i isoform 3                                  | Whole cell | 5  | 0.94 | 0.81 | 1.38  | 1.02 | 0.92 | 1.38  |
| 10.4  | RSL1D1    | 118498359 | ribosomal L1 domain containing 1                                              | Whole cell | 5  | 0.50 | 0.60 | 1.82  | 0.61 | 0.82 | 1.64  |
| 10.38 | LAMB1     | 4504951   | laminin, beta 1                                                               | Whole cell | 6  | 1.32 | 0.22 | 1.87  | 1.43 | 0.19 | 1.51  |
| 10.31 | CKAP4     | 19920317  | cytoskeleton-associated protein 4                                             | Whole cell | 5  | 0.89 | 0.53 | 1.38  | 0.99 | 0.98 | 1.45  |
| 10.3  | NUDC      | 5729953   | nuclear distribution gene C homolog                                           | Whole cell | 5  | 0.50 | 0.34 | 1.74  | 0.90 | 0.75 | 1.53  |
| 10.28 | DDX3X     | 87196351  | DEAD/H (Asp-Glu-Ala-Asp/His) box polypeptide 3                                | Whole cell | 9  | 1.29 | 0.28 | 1.37  | 1.24 | 0.15 | 1.32  |
| 10.27 | HNRNPH3   | 14141157  | heterogeneous nuclear ribonucleoprotein H3 isoform a                          | Whole cell | 6  | 0.15 | 0.02 | 2.00  | 0.06 | 0.02 | 3.73  |
| 10.22 | PSMD2     | 25777602  | proteasome 26S non-ATPase subunit 2                                           | Whole cell | 5  | 1.05 | 0.90 | 16.00 | 1.02 | 0.96 | 15.56 |
| 10.2  | LDHA      | 5031857   | lactate dehydrogenase A                                                       | Whole cell | 10 | 4.02 | 0.01 | 1.50  | 3.91 | 0.01 | 1.51  |
| 10.18 | RPL18     | 4506607   | ribosomal protein L18                                                         | Whole cell | 5  | 0.90 | 0.88 | 1.53  | 0.90 | 0.97 | 1.66  |
| 10.14 | PRDX3     | 5802974   | peroxiredoxin 3 isoform a                                                     | Whole cell | 5  | 0.54 | 0.02 | 1.82  | 0.35 | 0.04 | 1.91  |
| 10.11 | LMNB1     | 5031877   | lamin B1                                                                      | Whole cell | 5  | 0.92 | 0.21 | 1.74  | 0.72 | 0.05 | 1.75  |
| 10.1  | APEX1     | 18375505  | APEX nuclease                                                                 | Whole cell | 4  | 1.00 | 0.83 | 1.20  | 1.02 | 0.90 | 1.27  |
| 10.07 | 2-Sep     | 56549640  | septin 2                                                                      | Whole cell | 5  | 0.87 | 0.42 | 1.54  | 0.98 | 0.75 | 1.49  |
| 10.04 | RPS7      | 4506741   | ribosomal protein S7                                                          | Whole cell | 5  | 2.96 | 0.76 | 1.92  | 2.07 | 0.94 | 1.75  |
| 10.04 | RPS9      | 14141193  | ribosomal protein S9                                                          | Whole cell | 4  | 0.05 | 0.00 | 3.19  | 0.05 | 0.00 | 3.66  |
| 10.02 | LOC652826 | 89064750  | PREDICTED: similar to 26S protease regulatory subunit 6B (TBP-7)              | Whole cell | 5  | 0.81 | 0.50 | 2.47  | 0.87 | 0.88 | 2.42  |
| 9.91  | YWHAG     | 21464101  | tyrosine 3-monooxygenase/tryptophan 5-monooxygenase activation protein, gamma | Whole cell | 8  | 2.61 | 0.33 | 2.03  | 3.66 | 0.25 | 2.29  |
| 9.9   | AKR1B1    | 4502049   | aldo-keto reductase family 1, member B1                                       | Whole cell | 4  | 0.44 | 0.29 | 1.77  | 0.60 | 0.29 | 1.53  |
| 9.77  | ATP6V1A   | 19913424  | ATPase, H+ transporting, lysosomal 70kD, V1 subunit A, isoform 1              | Whole cell | 5  | 1.07 | 0.47 | 2.78  | 1.17 | 0.17 | 2.27  |
| 9.71  | PRDX4     | 5453549   | thioredoxin peroxidase                                                        | Whole cell | 7  | 0.23 | 0.04 | 1.50  | 0.13 | 0.04 | 2.05  |
| 9.63  | GLUD1     | 4885281   | glutamate dehydrogenase 1                                                     | Whole cell | 3  | 1.08 | 0.29 | 1.67  | 1.21 | 0.73 | 1.63  |
| 9.58  | FKBP10    | 21361895  | FK506 binding protein 10, 65 kDa                                              | Whole cell | 4  | 1.22 | 0.41 | 2.09  | 1.16 | 0.50 | 2.09  |
| 9.55  | IMMT      | 5803115   | inner membrane protein, mitochondrial                                         | Whole cell | 5  | 1.06 | 0.45 | 1.58  | 0.96 | 0.62 | 1.51  |
| 9.55  | PRKCSH    | 48255891  | protein kinase C substrate 80K-H isoform 2                                    | Whole cell | 5  | 0.47 | 0.29 | 2.23  | 0.44 | 0.27 | 2.11  |
| 9.53  | SHMT2     | 19923315  | serine hydroxymethyltransferase 2 (mitochondrial)                             | Whole cell | 6  | 1.09 | 0.75 | 19.59 | 0.93 | 0.84 | 19.23 |
| 9.51  | DDX21     | 50659095  | DEAD (Asp-Glu-Ala-Asp) box polypeptide 21                                     | Whole cell | 4  | 0.93 | 0.80 | 2.19  | 0.74 | 0.47 | 2.19  |
| 9.47  | RAB10     | 33695095  | ras-related GTP-binding protein RAB10                                         | Whole cell | 6  | 0.82 | 0.51 | 1.27  | 0.82 | 0.45 | 1.25  |
| 9.46  | RUVBL1    | 4506753   | RuvB-like 1                                                                   | Whole cell | 6  | 4.70 | 0.06 | 2.31  | 5.55 | 0.00 | 2.47  |
| 9.39  | RPL11     | 15431290  | ribosomal protein L11                                                         | Whole cell | 4  | 3.70 | 0.72 | 1.84  | 5.06 | 0.71 | 1.85  |
| 9.36  | PRDX5     | 6912238   | peroxiredoxin 5, isoform a                                                    | Whole cell | 5  | 0.53 | 0.60 | 1.69  | 0.70 | 0.87 | 1.58  |
| 9.36  | PODXL     | 66277202  | podocalyxin-like isoform 1                                                    | Whole cell | 4  | 1.18 | 0.74 | 1.41  | 1.15 | 0.80 | 1.41  |
| 9.3   | LOC649821 | 89036208  | PREDICTED: similar to 60S ribosomal protein L14                               | Whole cell | 5  | 0.27 | 0.08 | 1.79  | 0.18 | 0.07 | 2.38  |
| 9.29  | GOT2      | 73486658  | aspartate aminotransferase 2                                                  | Whole cell | 5  | 1.22 | 0.98 | 4.45  | 1.28 | 0.98 | 4.45  |
| 9.25  | FDFT1     | 67089147  | farnesyl-diphosphate farnesyltransferase 1                                    | Whole cell | 5  | 0.69 | 0.49 | 1.54  | 0.69 | 0.62 | 1.47  |
| 9.1   | PSMA5     | 23110942  | proteasome alpha 5 subunit                                                    | Whole cell | 4  | 1.06 | 0.87 | 1.45  | 1.01 | 0.79 | 1.89  |
| 9.07  | IPO5      | 24797086  | RAN binding protein 5                                                         | Whole cell | 4  | 1.94 | 0.69 | 1.85  | 1.63 | 0.85 | 1.91  |
| 9.07  | PSMD1     | 25777600  | proteasome 26S non-ATPase subunit 1                                           | Whole cell | 4  | 0.90 | 0.53 | 2.05  | 1.06 | 0.66 | 1.53  |
| 9.05  | CRABP1    | 4758052   | cellular retinoic acid binding protein 1                                      | Whole cell | 6  | 1.32 | 0.44 | 1.54  | 1.64 | 0.31 | 1.36  |
| 9.04  | PLEC1     | 41322916  | plectin 1 isoform 6                                                           | Whole cell | 3  | 2.15 | 0.41 | 1.98  | 1.72 | 0.57 | 1.98  |
| 9.03  | RPL8      | 4506663   | ribosomal protein L8                                                          | Whole cell | 5  | 2.23 | 0.72 | 1.42  | 2.81 | 0.47 | 1.51  |
| 8.99  | TUBB3     | 50592996  | tubulin, beta, 4                                                              | Whole cell | 43 | 0.86 | 0.35 | 3.91  | 0.74 | 0.16 | 2.27  |
| 8.99  | TPR       | 114155142 | nuclear pore complex-associated protein TPR                                   | Whole cell | 4  | 1.06 | 0.69 | 1.51  | 1.01 | 0.83 | 1.38  |
| 8.98  | LARS      | 108773810 | leucyl-tRNA synthetase                                                        | Whole cell | 4  | 0.72 | 0.50 | 1.94  | 0.62 | 0.14 | 1.92  |
| 8.95  | EEF1B2    | 83376130  | eukaryotic translation elongation factor 1 beta 2                             | Whole cell | 5  | 0.92 | 0.42 | 1.57  | 0.86 | 0.25 | 1.60  |
| 8.94  | PGRMC1    | 5729875   | progesterone receptor membrane component 1                                    | Whole cell | 4  | 0.82 | 0.41 | 1.43  | 0.75 | 0.36 | 1.57  |
| 8.94  | ASNS      | 34452703  | asparagine synthetase                                                         | Whole cell | 4  | 0.78 | 0.32 | 4.09  | 0.77 | 0.30 | 4.45  |
| 8.92  | MSH2      | 4557761   | mutS homolog 2                                                                | Whole cell | 3  | 0.93 | 0.61 | 1.57  | 0.95 | 0.74 | 1.58  |
| 8.92  | COPE      | 31542319  | epsilon subunit of coatomer protein complex isoform a                         | Whole cell | 4  | 1.12 | 0.94 | 4.45  | 1.32 | 0.82 | 4.45  |
| 8.84  | RPL27A    | 4506625   | ribosomal protein L27a                                                        | Whole cell | 6  | 0.95 | 0.10 | 1.10  | 0.96 | 0.17 | 1.10  |
| 8.82  | L1TD1     | 31542663  | LINE-1 type transposase domain containing 1                                   | Whole cell | 5  | 4.21 | 0.01 | 1.17  | 4.57 | 0.01 | 1.22  |

|      |           |           |                                                                          |            |    |       |      |      |       |      |      |
|------|-----------|-----------|--------------------------------------------------------------------------|------------|----|-------|------|------|-------|------|------|
| 8.81 | HNRNPD    | 14110417  | heterogeneous nuclear ribonucleoprotein D isoform b                      | Whole cell | 4  | 0.30  | 0.15 | 1.75 | 0.42  | 0.19 | 1.54 |
| 8.81 | SF3B3     | 54112121  | splicing factor 3b, subunit 3                                            | Whole cell | 5  | 0.82  | 0.45 | 1.31 | 0.79  | 0.34 | 1.33 |
| 8.76 | KARS      | 5031815   | lysyl-tRNA synthetase                                                    | Whole cell | 3  | 1.02  | 0.86 | 2.19 | 1.25  | 0.85 | 2.19 |
| 8.76 | PSMA6     | 23110944  | proteasome alpha 6 subunit                                               | Whole cell | 5  | 0.05  | 0.15 | 2.19 | 0.09  | 0.17 | 1.96 |
| 8.75 | SRRM2     | 118572613 | splicing coactivator subunit SRm300                                      | Whole cell | 4  | 1.17  | 0.32 | 1.29 | 1.17  | 0.42 | 1.28 |
| 8.7  | MARCKS    | 11125772  | myristoylated alanine-rich protein kinase C substrate                    | Whole cell | 4  | 1.36  | 0.44 | 1.47 | 1.37  | 0.59 | 1.47 |
| 8.7  | HMGAI1    | 22208977  | high mobility group AT-hook 1 isoform a                                  | Whole cell | 5  | 4.97  | 0.05 | 2.00 | 5.01  | 0.05 | 2.01 |
| 8.7  | MCM4      | 33469919  | minichromosome maintenance protein 4                                     | Whole cell | 4  | 0.99  | 0.92 | 1.67 | 0.96  | 0.84 | 1.67 |
| 8.68 | LOC645441 | 88947792  | PREDICTED: similar to 60S ribosomal protein L17 (L23) isoform 1          | Whole cell | 6  | 14.06 | 0.38 | 3.05 | 16.00 | 0.32 | 3.08 |
| 8.64 | CALU      | 4502551   | calumenin                                                                | Whole cell | 4  | 0.54  | 0.17 | 1.64 | 0.31  | 0.12 | 2.23 |
| 8.64 | TECR      | 24475816  | glycoprotein, synaptic 2                                                 | Whole cell | 4  | 0.98  | 0.56 | 2.00 | 0.86  | 0.50 | 1.94 |
| 8.64 | SNRPA1    | 50593002  | small nuclear ribonucleoprotein polypeptide A'                           | Whole cell | 4  | 0.70  | 0.85 | 1.61 | 0.79  | 0.98 | 1.60 |
| 8.59 | DNMT1     | 4503351   | DNA (cytosine-5-)-methyltransferase 1                                    | Whole cell | 4  | 0.61  | 0.18 | 2.19 | 0.56  | 0.08 | 2.19 |
| 8.57 | CBS       | 4557415   | cystathionine-beta-synthase                                              | Whole cell | 5  | 1.51  | 0.99 | 1.51 | 1.42  | 0.99 | 1.51 |
| 8.56 | CTPS      | 4503133   | CTP synthase                                                             | Whole cell | 5  | 0.74  | 0.39 | 1.74 | 0.29  | 0.15 | 2.75 |
| 8.52 | CLIC4     | 7330335   | chloride intracellular channel 4                                         | Whole cell | 5  | 2.03  | 0.36 | 1.77 | 2.00  | 0.51 | 1.79 |
| 8.44 | H2AFV     | 6912616   | H2A histone family, member V isoform 1                                   | Whole cell | 9  | 0.96  | 0.91 | 1.13 | 0.94  | 0.93 | 1.19 |
| 8.42 | EIF3L     | 7705433   | eukaryotic translation initiation factor 3 subunit 6 interacting protein | Whole cell | 4  | 0.53  | 0.12 | 1.94 | 0.45  | 0.08 | 1.96 |
| 8.4  | EIF4B     | 50053795  | eukaryotic translation initiation factor 4B                              | Whole cell | 5  | 1.51  | 0.49 | 2.88 | 1.16  | 0.80 | 4.45 |
| 8.33 | AHNAK     | 61743954  | AHNAK nucleoprotein isoform 1                                            | Whole cell | 3  | 0.99  | 0.78 | 1.31 | 1.14  | 0.23 | 1.25 |
| 8.28 | NUP155    | 4758844   | nucleoporin 155kDa isoform 2                                             | Whole cell | 4  | 1.82  | 0.57 | 2.01 | 1.22  | 0.98 | 1.85 |
| 8.25 | RHOA      | 10835049  | ras homolog gene family, member A                                        | Whole cell | 3  | 0.36  | 0.40 | 2.05 | 0.21  | 0.40 | 3.19 |
| 8.24 | SMC3      | 4885399   | structural maintenance of chromosomes 3                                  | Whole cell | 3  | 0.92  | 0.91 | 2.03 | 0.65  | 0.09 | 2.70 |
| 8.22 | PCNA      | 4505641   | proliferating cell nuclear antigen                                       | Whole cell | 3  | 0.25  | 0.03 | 1.63 | 0.19  | 0.02 | 1.47 |
| 8.22 | MDH1      | 5174539   | cytosolic malate dehydrogenase                                           | Whole cell | 4  | 0.94  | 0.91 | 1.41 | 0.79  | 0.41 | 1.51 |
| 8.2  | TTN       | 110349719 | titin isoform N2-A                                                       | Whole cell | 1  | 0.90  | 0.78 | 2.73 | 1.02  | 0.89 | 2.31 |
| 8.19 | TNPO3     | 6912734   | transportin 3                                                            | Whole cell | 4  | 0.92  | 0.65 | 1.36 | 1.00  | 1.00 | 1.41 |
| 8.19 | RP18      | 11968182  | ribosomal protein S18                                                    | Whole cell | 5  | 0.98  | 0.96 | 1.56 | 1.03  | 0.93 | 1.56 |
| 8.19 | STRAP     | 20149592  | serine/threonine kinase receptor associated protein                      | Whole cell | 4  | 1.08  | 0.85 | 2.27 | 1.04  | 0.64 | 2.33 |
| 8.18 | EPB41L2   | 4503579   | erythrocyte membrane protein band 4.1-like 2                             | Whole cell | 3  | 1.18  | 0.78 | 1.84 | 1.03  | 0.73 | 1.87 |
| 8.14 | PCBP1     | 5453854   | poly(rC) binding protein 1                                               | Whole cell | 10 | 0.55  | 0.28 | 1.38 | 0.59  | 0.30 | 1.38 |
| 8.14 | RPS5      | 13904870  | ribosomal protein S5                                                     | Whole cell | 5  | 3.66  | 0.37 | 1.67 | 3.84  | 0.15 | 1.67 |
| 8.07 | SNRPD1    | 5902102   | small nuclear ribonucleoprotein D1 polypeptide 16kDa                     | Whole cell | 4  | 1.16  | 0.28 | 1.28 | 1.16  | 0.33 | 1.28 |
| 8.05 | PPP2CA    | 4506017   | protein phosphatase 2, catalytic subunit, alpha isoform                  | Whole cell | 4  | 1.49  | 0.04 | 4.45 | 1.43  | 0.04 | 4.45 |
| 8.05 | UBE2L3    | 4507789   | ubiquitin-conjugating enzyme E2L 3 isoform 1                             | Whole cell | 4  | 1.14  | 0.78 | 1.27 | 1.20  | 0.65 | 1.28 |
| 8.04 | CNN3      | 4502923   | calponin 3                                                               | Whole cell | 4  | 0.93  | 0.78 | 1.39 | 0.87  | 0.59 | 1.43 |
| 8.04 | PAK2      | 32483399  | p21-activated kinase 2                                                   | Whole cell | 4  | 1.24  | 0.69 | 2.15 | 1.13  | 0.81 | 2.15 |
| 8    | NAP1L4    | 5174613   | nucleosome assembly protein 1-like 4                                     | Whole cell | 5  | 1.22  | 0.54 | 1.46 | 1.39  | 0.41 | 1.25 |
| 8    | LOC643287 | 89036005  | PREDICTED: similar to prothymosin, alpha                                 | Whole cell | 10 | 0.86  | 0.78 | 2.09 | 0.61  | 0.43 | 2.11 |
| 7.99 | STMN1     | 5031851   | stathmin 1                                                               | Whole cell | 3  | 0.69  | 0.18 | 1.37 | 1.41  | 0.51 | 1.39 |
| 7.91 | C1QBP     | 4502491   | complement component 1, q subcomponent binding protein                   | Whole cell | 5  | 1.13  | 0.96 | 1.41 | 1.15  | 1.00 | 1.42 |
| 7.9  | SFRS3     | 4506901   | splicing factor, arginine/serine-rich 3                                  | Whole cell | 4  | 0.73  | 0.90 | 1.54 | 0.76  | 0.97 | 1.75 |
| 7.89 | KRT19     | 24234699  | keratin 19                                                               | Whole cell | 5  | 0.88  | 0.25 | 2.13 | 0.88  | 0.29 | 2.25 |
| 7.87 | PDHB      | 4505687   | pyruvate dehydrogenase (lipoamide) beta                                  | Whole cell | 5  | 1.03  | 0.99 | 1.22 | 0.98  | 0.79 | 1.28 |
| 7.84 | NOP56     | 32483374  | nucleolar protein 5A                                                     | Whole cell | 5  | 0.98  | 0.55 | 1.28 | 1.06  | 0.45 | 1.50 |
| 7.83 | 11-Sep    | 8922712   | septin 11                                                                | Whole cell | 3  | 0.56  | 0.39 | 1.45 | 0.39  | 0.30 | 1.33 |
| 7.81 | PSMC1     | 24430151  | proteasome 26S ATPase subunit 1                                          | Whole cell | 6  | 0.30  | 0.07 | 2.40 | 0.63  | 0.61 | 1.94 |
| 7.77 | PSMC3     | 21361144  | proteasome 26S ATPase subunit 3                                          | Whole cell | 5  | 0.75  | 0.35 | 1.85 | 0.65  | 0.16 | 1.60 |
| 7.74 | PGLS      | 6912586   | 6-phosphogluconolactonase                                                | Whole cell | 4  | 1.17  | 0.98 | 1.72 | 1.10  | 0.13 | 2.19 |
| 7.72 | PSMC5     | 24497435  | proteasome 26S ATPase subunit 5                                          | Whole cell | 5  | 0.03  | 0.17 | 4.61 | 0.11  | 0.21 | 2.70 |
| 7.7  | RPL22     | 4506613   | ribosomal protein L22 proprotein                                         | Whole cell | 5  | 1.12  | 0.92 | 1.21 | 1.14  | 0.84 | 1.18 |
| 7.7  | CFL1      | 5031635   | cofilin 1 (non-muscle)                                                   | Whole cell | 5  | 2.33  | 0.71 | 1.69 | 2.07  | 0.48 | 1.57 |
| 7.67 | MIF       | 4505185   | macrophage migration inhibitory factor (glycosylation-inhibiting factor) | Whole cell | 4  | 0.06  | 0.15 | 2.73 | 0.04  | 0.14 | 3.44 |
| 7.67 | PCMT1     | 4885539   | protein-L-isoaspartate (D-aspartate) O-methyltransferase                 | Whole cell | 4  | 0.05  | 0.02 | 3.53 | 0.17  | 0.05 | 2.23 |
| 7.65 | RPL26     | 4506621   | ribosomal protein L26                                                    | Whole cell | 4  | 1.10  | 0.81 | 1.31 | 0.95  | 0.64 | 1.39 |
| 7.64 | CTNND1    | 10835010  | catenin (cadherin-associated protein), delta 1                           | Whole cell | 5  | 1.04  | 0.97 | 1.28 | 0.99  | 0.80 | 1.21 |
| 7.61 | ATP2A2    | 24638454  | ATPase, Ca++ transporting, cardiac muscle, slow twitch 2 isoform 1       | Whole cell | 5  | 0.88  | 0.70 | 1.58 | 0.98  | 0.87 | 1.39 |
| 7.6  | UBE2N     | 4507793   | ubiquitin-conjugating enzyme E2N                                         | Whole cell | 4  | 0.97  | 0.19 | 1.27 | 1.04  | 0.60 | 1.25 |
| 7.59 | WDR1      | 9257257   | WD repeat-containing protein 1 isoform 1                                 | Whole cell | 4  | 0.96  | 0.22 | 1.94 | 1.04  | 0.40 | 1.94 |
| 7.54 | CLDN6     | 11141863  | claudin 6                                                                | Whole cell | 4  | 0.95  | 0.16 | 1.28 | 0.93  | 0.14 | 1.22 |
| 7.53 | YWHAB     | 4507949   | 14-3-3, beta polypeptide                                                 | Whole cell | 11 | 1.92  | 0.24 | 1.71 | 2.75  | 0.17 | 1.63 |

|      |           |           |                                                                            |            |    |       |      |       |       |      |       |
|------|-----------|-----------|----------------------------------------------------------------------------|------------|----|-------|------|-------|-------|------|-------|
| 7.53 | YWHAH     | 4507951   | tyrosine 3/tryptophan 5-monoxygenase activation protein, eta polypeptide   | Whole cell | 9  | 1.58  | 0.29 | 1.49  | 1.61  | 0.29 | 1.51  |
| 7.52 | PAFAH1B2  | 4505585   | platelet-activating factor acetylhydrolase, isoform Ib, beta subunit 30kDa | Whole cell | 3  | 1.58  | 0.40 | 1.92  | 1.54  | 0.44 | 1.79  |
| 7.5  | PSMD3     | 25777612  | proteasome 26S non-ATPase subunit 3                                        | Whole cell | 3  | 2.75  | 0.06 | 1.63  | 3.22  | 0.05 | 1.74  |
| 7.48 | CRABP2    | 4503029   | cellular retinoic acid binding protein 2                                   | Whole cell | 5  | 0.23  | 0.13 | 1.82  | 0.35  | 0.21 | 1.87  |
| 7.46 | HUWE1     | 61676188  | HECT, UBA and WWE domain containing 1                                      | Whole cell | 3  | 0.82  | 0.46 | 1.57  | 0.88  | 0.77 | 1.66  |
| 7.45 | RPS6      | 17158044  | ribosomal protein S6                                                       | Whole cell | 7  | 3.05  | 0.73 | 1.92  | 2.73  | 0.62 | 1.85  |
| 7.44 | ACTR3     | 5031573   | ARP3 actin-related protein 3 homolog                                       | Whole cell | 4  | 0.94  | 0.90 | 2.09  | 0.96  | 0.96 | 2.09  |
| 7.42 | SNRPF     | 4507131   | small nuclear ribonucleoprotein polypeptide F                              | Whole cell | 4  | 0.38  | 0.25 | 2.11  | 0.41  | 0.27 | 2.09  |
| 7.39 | IGF2BP2   | 64085377  | insulin-like growth factor 2 mRNA binding protein 2 isoform a              | Whole cell | 7  | 0.82  | 0.59 | 14.32 | 0.74  | 0.45 | 4.02  |
| 7.38 | APOE      | 4557325   | apolipoprotein E                                                           | Whole cell | 4  | 2.09  | 0.19 | 2.58  | 1.51  | 0.34 | 2.15  |
| 7.34 | CSTB      | 4503117   | cystatin B                                                                 | Whole cell | 3  | 0.15  | 0.05 | 2.29  | 0.16  | 0.06 | 1.87  |
| 7.34 | CYCS      | 11128019  | cytochrome c                                                               | Whole cell | 3  | 0.94  | 0.51 | 1.26  | 0.86  | 0.45 | 1.27  |
| 7.31 | MCM2      | 33356547  | minichromosome maintenance protein 2                                       | Whole cell | 3  | 0.79  | 0.50 | 2.03  | 0.69  | 0.20 | 1.66  |
| 7.3  | NACA      | 5031931   | nascent-polypeptide-associated complex alpha polypeptide                   | Whole cell | 5  | 0.68  | 0.33 | 1.49  | 0.54  | 0.29 | 1.61  |
| 7.3  | YWHAQ     | 5803227   | tyrosine 3/tryptophan 5-monoxygenase activation protein, theta polypeptide | Whole cell | 11 | 6.61  | 0.07 | 2.58  | 7.24  | 0.02 | 2.51  |
| 7.3  | TMED10    | 98986464  | transmembrane emp24 domain-containing protein 10                           | Whole cell | 3  | 0.20  | 0.24 | 2.44  | 0.17  | 0.31 | 2.88  |
| 7.29 | ARF1      | 66879664  | ADP-ribosylation factor 1                                                  | Whole cell | 3  | 0.86  | 0.10 | 1.63  | 0.98  | 0.28 | 1.64  |
| 7.27 | TARS      | 38202255  | threonyl-tRNA synthetase                                                   | Whole cell | 3  | 0.42  | 0.48 | 1.89  | 0.13  | 0.40 | 2.68  |
| 7.15 | MCM7      | 33469968  | minichromosome maintenance protein 7 isoform 1                             | Whole cell | 3  | 0.58  | 0.04 | 4.49  | 0.64  | 0.09 | 2.58  |
| 7.14 | PSMB2     | 4506195   | proteasome beta 2 subunit                                                  | Whole cell | 3  | 0.15  | 0.03 | 1.89  | 0.21  | 0.04 | 1.71  |
| 7.12 | MCM3      | 6631095   | minichromosome maintenance protein 3                                       | Whole cell | 3  | 0.70  | 0.52 | 2.51  | 1.00  | 0.40 | 2.73  |
| 7.12 | GPI       | 18201905  | glucose phosphate isomerase                                                | Whole cell | 3  | 1.11  | 0.77 | 2.19  | 0.95  | 0.93 | 2.09  |
| 7.11 | GLO1      | 118402586 | glyoxalase I                                                               | Whole cell | 3  | 2.11  | 0.49 | 1.67  | 1.96  | 0.55 | 1.64  |
| 7.08 | COPB1     | 7705369   | coatamer protein complex, subunit beta                                     | Whole cell | 3  | 1.05  | 0.83 | 1.38  | 1.04  | 0.87 | 1.38  |
| 7.03 | TMEM189-U | 40806190  | ubiquitin-conjugating enzyme E2 Kua-UEV isoform 1                          | Whole cell | 3  | 0.77  | 0.02 | 1.27  | 0.94  | 0.34 | 1.54  |
| 7.02 | PHB2      | 6005854   | prohibitin 2                                                               | Whole cell | 3  | 0.90  | 0.88 | 1.61  | 1.01  | 0.66 | 1.51  |
| 7    | SSRP1     | 4507241   | structure specific recognition protein 1                                   | Whole cell | 4  | 0.04  | 0.07 | 6.61  | 0.15  | 0.30 | 3.02  |
| 6.98 | BASP1     | 30795231  | brain abundant, membrane attached signal protein 1                         | Whole cell | 3  | 10.09 | 0.03 | 4.13  | 10.47 | 0.03 | 4.83  |
| 6.96 | SERPINB9  | 4758906   | serine (or cysteine) proteinase inhibitor, clade B (ovalbumin), member 9   | Whole cell | 3  | 1.47  | 0.16 | 1.74  | 1.72  | 0.10 | 1.89  |
| 6.96 | DDX1      | 4826686   | DEAD (Asp-Glu-Ala-Asp) box polypeptide 1                                   | Whole cell | 4  | 2.05  | 0.78 | 1.84  | 3.31  | 0.05 | 1.74  |
| 6.96 | QPRT      | 45269149  | quinolinate phosphoribosyltransferase                                      | Whole cell | 3  | 0.66  | 0.34 | 1.79  | 0.53  | 0.30 | 1.89  |
| 6.92 | CACYBP    | 7656952   | calcyclin binding protein isoform 1                                        | Whole cell | 4  | 0.58  | 0.92 | 2.01  | 0.53  | 0.56 | 2.05  |
| 6.9  | HSPH1     | 42544159  | heat shock 105kd                                                           | Whole cell | 3  | 1.00  | 0.10 | 1.17  | 1.01  | 0.07 | 1.20  |
| 6.88 | DEK       | 4503249   | DEK oncogene                                                               | Whole cell | 3  | 0.06  | 0.02 | 2.86  | 0.14  | 0.03 | 2.29  |
| 6.87 | PDHA1     | 4505685   | pyruvate dehydrogenase (lipoamide) alpha 1                                 | Whole cell | 5  | 0.19  | 0.02 | 2.88  | 0.29  | 0.03 | 2.58  |
| 6.87 | PGM1      | 21361621  | phosphoglucomutase 1                                                       | Whole cell | 2  | 1.31  | 0.61 | 2.11  | 1.18  | 0.73 | 2.09  |
| 6.87 | ASNA1     | 50428938  | arsA arsenite transporter, ATP-binding, homolog 1                          | Whole cell | 3  | 0.67  | 0.47 | 2.07  | 0.69  | 0.57 | 2.19  |
| 6.82 | LTA4H     | 4505029   | leukotriene A4 hydrolase                                                   | Whole cell | 3  | 0.72  | 0.64 | 2.19  | 0.67  | 0.51 | 2.17  |
| 6.81 | LOC401206 | 88988836  | PREDICTED: similar to 40S ribosomal protein S25                            | Whole cell | 4  | 0.26  | 0.09 | 2.11  | 0.17  | 0.50 | 2.75  |
| 6.8  | ESYT1     | 14149680  | family with sequence similarity 62 (C2 domain containing), member A        | Whole cell | 3  | 0.73  | 0.86 | 1.96  | 0.49  | 0.77 | 2.13  |
| 6.8  | PELP1     | 24415383  | proline-, glutamic acid-, leucine-rich protein 1                           | Whole cell | 3  | 1.79  | 0.35 | 1.54  | 1.96  | 0.32 | 1.42  |
| 6.78 | RPL15     | 15431293  | ribosomal protein L15                                                      | Whole cell | 3  | 0.13  | 0.11 | 1.42  | 0.12  | 0.11 | 1.43  |
| 6.77 | ACIN1     | 7662238   | apoptotic chromatin condensation inducer 1                                 | Whole cell | 3  | 1.01  | 0.98 | 19.05 | 1.10  | 0.69 | 15.70 |
| 6.74 | RPL18A    | 11415026  | ribosomal protein L18a                                                     | Whole cell | 3  | 0.41  | 0.08 | 1.91  | 0.30  | 0.07 | 1.57  |
| 6.74 | LOC284672 | 27481323  | PREDICTED: similar to unactive progesterone receptor, 23 kD                | Whole cell | 2  | 1.46  | 0.73 | 1.69  | 1.31  | 0.05 | 1.69  |
| 6.73 | RPLP1     | 4506669   | ribosomal protein P1 isoform 1                                             | Whole cell | 3  | 0.78  | 0.83 | 1.84  | 0.72  | 0.87 | 1.84  |
| 6.73 | USP5      | 4507855   | Ubiquitin isopeptidase T                                                   | Whole cell | 3  | 0.88  | 0.28 | 1.71  | 0.78  | 0.09 | 1.82  |
| 6.73 | PFAS      | 31657129  | phosphoribosylformylglycinamide synthase                                   | Whole cell | 3  | 2.65  | 0.15 | 2.83  | 3.22  | 0.13 | 2.09  |
| 6.69 | PRPS1     | 4506127   | phosphoribosyl pyrophosphate synthetase 1                                  | Whole cell | 3  | 0.17  | 0.07 | 2.33  | 0.36  | 0.18 | 1.67  |
| 6.65 | FDPS      | 4503685   | farnesyl diphosphate synthase                                              | Whole cell | 4  | 0.70  | 0.21 | 1.21  | 0.65  | 0.17 | 1.24  |
| 6.64 | PFKL      | 50346005  | liver phosphofructokinase isoform a                                        | Whole cell | 3  | 0.89  | 0.52 | 2.15  | 0.96  | 0.89 | 3.98  |
| 6.57 | PSMD6     | 7661914   | proteasome (prosome, macropain) 26S subunit, non-ATPase, 6                 | Whole cell | 3  | 1.80  | 0.14 | 1.50  | 1.74  | 0.34 | 1.49  |
| 6.56 | ADH5      | 71565154  | class III alcohol dehydrogenase 5 chi subunit                              | Whole cell | 3  | 2.33  | 0.11 | 1.80  | 2.75  | 0.15 | 1.80  |
| 6.55 | TXN       | 50592994  | thioredoxin                                                                | Whole cell | 4  | 3.40  | 0.12 | 2.07  | 4.37  | 0.09 | 2.31  |
| 6.54 | ANP32A    | 5453880   | acidic (leucine-rich) nuclear phosphoprotein 32 family, member A           | Whole cell | 7  | 0.59  | 0.08 | 1.66  | 0.49  | 0.08 | 1.47  |
| 6.53 | TBCA      | 4759212   | tubulin-specific chaperone a                                               | Whole cell | 3  | 2.44  | 0.62 | 1.80  | 1.67  | 0.82 | 1.66  |
| 6.52 | TSN       | 4759270   | translin                                                                   | Whole cell | 4  | 1.12  | 0.57 | 1.15  | 1.12  | 0.91 | 1.33  |
| 6.49 | SFRS9     | 4506903   | splicing factor, arginine/serine-rich 9                                    | Whole cell | 3  | 2.23  | 0.43 | 2.23  | 2.94  | 0.90 | 2.63  |
| 6.48 | FXR1      | 61835148  | fragile X mental retardation-related protein 1 isoform a                   | Whole cell | 3  | 0.74  | 0.30 | 4.45  | 0.79  | 0.41 | 4.45  |
| 6.46 | RPS11     | 4506681   | ribosomal protein S11                                                      | Whole cell | 3  | 1.28  | 0.35 | 1.80  | 0.48  | 0.85 | 2.09  |
| 6.45 | MSH6      | 4504191   | mutS homolog 6                                                             | Whole cell | 3  | 0.84  | 0.30 | 1.51  | 0.84  | 0.33 | 1.47  |



|      |           |           |                                                                             |            |   |       |      |       |       |      |       |
|------|-----------|-----------|-----------------------------------------------------------------------------|------------|---|-------|------|-------|-------|------|-------|
| 6.45 | RPL31     | 4506633   | ribosomal protein L31                                                       | Whole cell | 2 | 0.97  | 0.53 | 1.24  | 0.98  | 0.50 | 1.25  |
| 6.43 | TPM4      | 4507651   | tropomyosin 4                                                               | Whole cell | 7 | 1.37  | 0.47 | 1.63  | 1.39  | 0.48 | 1.69  |
| 6.41 | MTCH2     | 7657347   | mitochondrial carrier homolog 2                                             | Whole cell | 3 | 0.90  | 0.87 | 1.58  | 0.94  | 0.86 | 1.34  |
| 6.4  | RPS15     | 4506687   | ribosomal protein S15                                                       | Whole cell | 4 | 1.85  | 0.36 | 2.11  | 1.64  | 0.42 | 2.09  |
| 6.4  | PPA1      | 11056044  | pyrophosphatase 1                                                           | Whole cell | 4 | 2.63  | 0.18 | 1.67  | 3.28  | 0.14 | 1.63  |
| 6.4  | SMARCA4   | 21071056  | SWI/SNF-related matrix-associated actin-dependent regulator of chromatin a4 | Whole cell | 3 | 0.56  | 0.38 | 2.09  | 0.43  | 0.28 | 2.09  |
| 6.4  | ACTR2     | 53692187  | actin-related protein 2 isoform a                                           | Whole cell | 4 | 0.63  | 0.45 | 2.09  | 0.74  | 0.59 | 2.09  |
| 6.38 | BANF1     | 4502389   | barrier to autointegration factor 1                                         | Whole cell | 3 | 1.71  | 0.33 | 1.56  | 1.96  | 0.28 | 1.63  |
| 6.37 | PRMT1     | 38195089  | HMT1 hnRNP methyltransferase-like 2 isoform 1                               | Whole cell | 3 | 0.95  | 0.49 | 1.94  | 1.10  | 0.36 | 1.94  |
| 6.35 | VDAC1     | 4507879   | voltage-dependent anion channel 1                                           | Whole cell | 3 | 0.52  | 0.69 | 2.29  | 0.47  | 0.49 | 2.27  |
| 6.27 | WARS      | 47419916  | tryptophanyl-tRNA synthetase isoform a                                      | Whole cell | 3 | 1.27  | 0.56 | 1.38  | 1.45  | 0.50 | 1.38  |
| 6.23 | SNRPD2    | 4759158   | small nuclear ribonucleoprotein polypeptide D2                              | Whole cell | 3 | 0.96  | 0.94 | 1.80  | 1.02  | 0.99 | 1.67  |
| 6.23 | NDUFAB1   | 4826852   | NADH dehydrogenase (ubiquinone) 1, alpha/beta subcomplex, 1, 8kDa           | Whole cell | 3 | 0.75  | 0.08 | 1.38  | 0.86  | 0.12 | 1.53  |
| 6.23 | TAGLN     | 48255907  | transgelin                                                                  | Whole cell | 4 | 2.49  | 0.22 | 2.09  | 2.56  | 0.21 | 2.13  |
| 6.2  | ARHGAP1   | 4757766   | Rho GTPase activating protein 1                                             | Whole cell | 3 | 0.98  | 0.86 | 18.88 | 0.90  | 0.95 | 3.13  |
| 6.19 | LONP1     | 21396489  | mitochondrial lon peptidase 1                                               | Whole cell | 3 | 0.83  | 0.37 | 4.45  | 0.86  | 0.50 | 4.45  |
| 6.19 | RBMX      | 56699409  | RNA binding motif protein, X-linked                                         | Whole cell | 3 | 0.88  | 0.85 | 1.47  | 0.85  | 0.68 | 1.38  |
| 6.19 | LOC647153 | 88955151  | PREDICTED: similar to voltage-dependent anion channel 2                     | Whole cell | 4 | 0.63  | 0.04 | 1.28  | 0.64  | 0.04 | 1.27  |
| 6.16 | TFRC      | 4507457   | transferrin receptor                                                        | Whole cell | 3 | 1.17  | 0.30 | 1.84  | 1.08  | 0.61 | 2.38  |
| 6.16 | HDLBP     | 4885409   | high density lipoprotein binding protein                                    | Whole cell | 3 | 1.31  | 0.51 | 1.50  | 1.46  | 0.57 | 1.79  |
| 6.14 | UQCRC2    | 50592988  | ubiquinol-cytochrome c reductase core protein II                            | Whole cell | 3 | 0.72  | 0.56 | 2.09  | 0.53  | 0.36 | 2.09  |
| 6.13 | NPEPPS    | 15451907  | aminopeptidase puromycin sensitive                                          | Whole cell | 3 | 0.79  | 0.49 | 19.41 | 0.95  | 0.76 | 19.05 |
| 6.12 | PPAT      | 29570798  | phosphoribosyl pyrophosphate amidotransferase proprotein                    | Whole cell | 3 | 0.96  | 0.71 | 7.38  | 0.88  | 0.33 | 2.42  |
| 6.11 | ACO2      | 4501867   | aconitase 2                                                                 | Whole cell | 3 | 1.56  | 0.20 | 2.73  | 1.41  | 0.33 | 2.73  |
| 6.11 | TXNDC5    | 42794771  | thioredoxin domain containing 5 isoform 1                                   | Whole cell | 3 | 1.51  | 0.94 | 1.56  | 1.63  | 0.77 | 1.56  |
| 6.11 | LOC644166 | 88980535  | PREDICTED: similar to 40S ribosomal protein S26                             | Whole cell | 4 | 0.20  | 0.17 | 2.09  | 0.18  | 0.15 | 2.09  |
| 6.1  | PTPLAD1   | 117168248 | butyrate-induced transcript 1                                               | Whole cell | 4 | 0.91  | 0.57 | 1.14  | 0.90  | 0.67 | 1.17  |
| 6.08 | TJP1      | 116875767 | tight junction protein 1 isoform a                                          | Whole cell | 3 | 4.37  | 0.06 | 1.66  | 4.92  | 0.05 | 1.61  |
| 6.05 | DDX47     | 41327776  | DEAD (Asp-Glu-Ala-Asp) box polypeptide 47 isoform 2                         | Whole cell | 3 | 0.55  | 0.07 | 1.41  | 0.70  | 0.16 | 4.33  |
| 6.04 | NP        | 4557801   | purine nucleoside phosphorylase                                             | Whole cell | 3 | 1.06  | 0.95 | 1.60  | 0.94  | 0.96 | 1.47  |
| 6.04 | SLC1A5    | 5032093   | solute carrier family 1 (neutral amino acid transporter), member 5          | Whole cell | 3 | 1.17  | 0.69 | 2.09  | 1.21  | 0.61 | 2.29  |
| 6.04 | STOML2    | 7305503   | stomatin (EPB72)-like 2                                                     | Whole cell | 3 | 1.11  | 0.62 | 2.31  | 3.08  | 0.47 | 2.15  |
| 6.04 | ZYX       | 58530845  | zyxin                                                                       | Whole cell | 3 | 5.35  | 0.21 | 1.75  | 4.79  | 0.24 | 1.84  |
| 6.03 | XPOT      | 8051636   | tRNA exportin                                                               | Whole cell | 2 | 0.28  | 0.03 | 1.82  | 0.19  | 0.02 | 2.27  |
| 6.02 | MAP1B     | 5174525   | microtubule-associated protein 1B isoform 1                                 | Whole cell | 2 | 1.06  | 0.87 | 19.41 | 0.91  | 0.55 | 18.03 |
| 6.02 | CYB5R3    | 6552328   | cytochrome b5 reductase isoform 2                                           | Whole cell | 3 | 2.01  | 0.48 | 1.24  | 2.01  | 0.47 | 1.34  |
| 6.02 | HNRPDL    | 14110407  | heterogeneous nuclear ribonucleoprotein D-like                              | Whole cell | 5 | 0.77  | 0.58 | 1.66  | 0.75  | 0.47 | 1.49  |
| 6.02 | PSPH      | 46249388  | phosphoserine phosphatase                                                   | Whole cell | 3 | 0.93  | 0.25 | 1.66  | 0.92  | 0.12 | 2.15  |
| 6.01 | TCEB1     | 5032161   | elongin C                                                                   | Whole cell | 4 | 4.29  | 0.18 | 3.16  | 3.84  | 0.21 | 2.75  |
| 6.01 | CSDA      | 20070160  | cold shock domain protein A                                                 | Whole cell | 5 | 2.75  | 0.28 | 1.33  | 2.25  | 0.40 | 1.34  |
| 6.01 | PSMC6     | 24430160  | proteasome 26S ATPase subunit 6                                             | Whole cell | 5 | 0.91  | 0.90 | 1.92  | 1.02  | 0.69 | 1.66  |
| 6    | RBM8A     | 4826972   | RNA binding motif protein 8A                                                | Whole cell | 3 | 0.26  | 0.29 | 1.61  | 0.21  | 0.25 | 1.79  |
| 6    | PTMS      | 46276863  | parathyromosin                                                              | Whole cell | 4 | 0.32  | 0.30 | 2.00  | 0.40  | 0.28 | 1.72  |
| 6    | SUMO2     | 54792071  | SMT3 suppressor of mif two 3 homolog 2 isoform b                            | Whole cell | 3 | 0.85  | 0.63 | 1.61  | 1.01  | 0.79 | 2.11  |
| 6    | 7-Sep     | 58535461  | cell division cycle 10 isoform 2                                            | Whole cell | 4 | 0.98  | 0.55 | 1.50  | 0.94  | 0.53 | 1.50  |
| 6    | HMG83     | 71143137  | high-mobility group box 3                                                   | Whole cell | 3 | 1.46  | 0.84 | 1.94  | 1.94  | 0.23 | 1.46  |
| 5.97 | ST13      | 19923193  | heat shock 70kD protein binding protein                                     | Whole cell | 5 | 1.74  | 0.39 | 2.11  | 1.71  | 0.40 | 2.09  |
| 5.92 | NHP2L1    | 51317376  | NHP2 non-histone chromosome protein 2-like 1                                | Whole cell | 3 | 0.12  | 0.05 | 2.11  | 0.17  | 0.03 | 2.36  |
| 5.89 | CS        | 38327625  | citrate synthase, isoform a                                                 | Whole cell | 3 | 1.03  | 0.98 | 2.19  | 0.81  | 0.29 | 2.19  |
| 5.88 | RPL38     | 78214522  | ribosomal protein L38                                                       | Whole cell | 2 | 0.94  | 0.95 | 1.25  | 1.04  | 0.94 | 1.25  |
| 5.87 | OLA1      | 58761500  | GTP-binding protein PTD004 isoform 1                                        | Whole cell | 3 | 1.36  | 0.50 | 2.21  | 0.81  | 0.78 | 2.29  |
| 5.83 | PRMT5     | 20070220  | protein arginine methyltransferase 5 isoform a                              | Whole cell | 2 | 1.60  | 0.60 | 4.49  | 1.10  | 0.32 | 4.53  |
| 5.78 | ALDH18A1  | 62912457  | pyrroline-5-carboxylate synthetase isoform 2                                | Whole cell | 3 | 1.05  | 0.46 | 4.41  | 1.16  | 0.40 | 4.41  |
| 5.7  | RPS27     | 4506711   | ribosomal protein S27                                                       | Whole cell | 4 | 3.84  | 0.25 | 1.77  | 4.70  | 0.37 | 1.75  |
| 5.62 | PEA15     | 4505705   | phosphoprotein enriched in astrocytes 15                                    | Whole cell | 3 | 1.13  | 0.80 | 2.09  | 1.33  | 0.59 | 2.09  |
| 5.62 | RBM4      | 93277122  | RNA binding motif protein 4                                                 | Whole cell | 3 | 1.53  | 0.47 | 2.09  | 1.38  | 0.55 | 2.09  |
| 5.6  | SMARCC1   | 21237802  | SWI/SNF-related matrix-associated actin-dependent regulator of chromatin c1 | Whole cell | 2 | 1.26  | 0.75 | 2.73  | 1.10  | 0.70 | 2.73  |
| 5.59 | LASP1     | 5453710   | LIM and SH3 protein 1                                                       | Whole cell | 3 | 1.58  | 0.20 | 2.09  | 1.45  | 0.23 | 4.37  |
| 5.57 | AASS      | 13027640  | aminoadipate-semialdehyde synthase                                          | Whole cell | 3 | 13.18 | 0.12 | 4.09  | 15.56 | 0.12 | 3.87  |
| 5.57 | PA2G4     | 124494254 | ErbB3-binding protein 1                                                     | Whole cell | 2 | 0.34  | 0.13 | 2.42  | 0.08  | 0.04 | 4.88  |
| 5.53 | PSME1     | 5453990   | proteasome activator subunit 1 isoform 1                                    | Whole cell | 3 | 0.90  | 0.44 | 2.40  | 0.93  | 0.50 | 2.25  |

|      |           |           |                                                                          |            |   |       |      |       |       |      |       |
|------|-----------|-----------|--------------------------------------------------------------------------|------------|---|-------|------|-------|-------|------|-------|
| 5.53 | RPS12     | 14277700  | ribosomal protein S12                                                    | Whole cell | 2 | 0.30  | 0.21 | 1.58  | 0.45  | 0.18 | 1.60  |
| 5.5  | FARSA     | 4758340   | phenylalanyl-tRNA synthetase, alpha subunit                              | Whole cell | 4 | 0.94  | 1.00 | 1.26  | 0.95  | 0.97 | 1.39  |
| 5.48 | C22orf28  | 7657015   | hypothetical protein LOC51493                                            | Whole cell | 4 | 0.91  | 0.66 | 1.79  | 1.06  | 0.72 | 2.65  |
| 5.47 | HADHB     | 4504327   | mitochondrial trifunctional protein, beta subunit                        | Whole cell | 3 | 0.63  | 0.37 | 3.77  | 0.45  | 0.22 | 2.11  |
| 5.46 | PSMB1     | 4506193   | proteasome beta 1 subunit                                                | Whole cell | 4 | 2.75  | 0.10 | 1.92  | 2.36  | 0.15 | 4.02  |
| 5.45 | CSDE1     | 56117852  | upstream of NRAS isoform 1                                               | Whole cell | 2 | 0.59  | 0.32 | 2.07  | 0.59  | 0.36 | 2.19  |
| 5.43 | NAE1      | 4502169   | amyloid beta protein-binding protein 1 isoform a                         | Whole cell | 3 | 1.10  | 0.61 | 2.51  | 1.15  | 0.48 | 2.11  |
| 5.42 | OAT       | 4557809   | ornithine aminotransferase                                               | Whole cell | 3 | 0.34  | 0.22 | 2.11  | 0.34  | 0.23 | 2.11  |
| 5.42 | ARPC2     | 5031599   | actin related protein 2/3 complex subunit 2                              | Whole cell | 3 | 1.08  | 1.00 | 1.85  | 0.92  | 0.62 | 1.89  |
| 5.42 | PSMD13    | 28872728  | proteasome 26S non-ATPase subunit 13 isoform 1                           | Whole cell | 3 | 0.60  | 0.51 | 1.32  | 0.68  | 0.53 | 1.36  |
| 5.41 | SSBP1     | 4507231   | single-stranded DNA binding protein 1                                    | Whole cell | 3 | 1.06  | 0.43 | 19.41 | 1.60  | 0.35 | 6.25  |
| 5.41 | OTUB1     | 109148508 | otubain 1                                                                | Whole cell | 3 | 0.79  | 0.63 | 2.19  | 0.38  | 0.76 | 2.19  |
| 5.4  | PPP2R2A   | 4506019   | alpha isoform of regulatory subunit B55, protein phosphatase 2           | Whole cell | 3 | 0.97  | 0.97 | 1.57  | 1.01  | 0.93 | 2.40  |
| 5.35 | DDOST     | 20070197  | dolichyl-diphosphooligosaccharide-protein glycosyltransferase            | Whole cell | 2 | 0.41  | 0.09 | 1.41  | 0.33  | 0.06 | 1.42  |
| 5.31 | PSMB6     | 23110925  | proteasome beta 6 subunit                                                | Whole cell | 3 | 1.32  | 0.96 | 4.45  | 1.18  | 0.88 | 4.45  |
| 5.3  | RANBP2    | 6382079   | RAN binding protein 2                                                    | Whole cell | 3 | 0.84  | 0.75 | 2.54  | 0.95  | 0.92 | 10.19 |
| 5.27 | PSIP1     | 19923653  | PC4 and SFRS1 interacting protein 1 isoform 2                            | Whole cell | 3 | 18.20 | 0.01 | 8.02  | 18.37 | 0.01 | 7.94  |
| 5.25 | ZNF207    | 73808090  | zinc finger protein 207 isoform b                                        | Whole cell | 2 | 0.97  | 0.93 | 1.98  | 1.41  | 0.48 | 1.25  |
| 5.24 | TALDO1    | 5803187   | transaldolase 1                                                          | Whole cell | 2 | 1.26  | 0.55 | 1.38  | 1.11  | 0.77 | 1.49  |
| 5.24 | HNRNPUL1  | 21536326  | E1B-55kDa-associated protein 5 isoform a                                 | Whole cell | 2 | 1.08  | 0.86 | 2.09  | 1.15  | 0.77 | 2.09  |
| 5.23 | RPL35A    | 16117791  | ribosomal protein L35a                                                   | Whole cell | 2 | 2.21  | 0.24 | 1.91  | 1.92  | 0.57 | 1.96  |
| 5.23 | PDCD6IP   | 22027538  | programmed cell death 6 interacting protein                              | Whole cell | 3 | 0.80  | 0.64 | 2.25  | 0.67  | 0.43 | 2.68  |
| 5.23 | DPPA4     | 52353966  | developmental pluripotency associated 4                                  | Whole cell | 2 | 1.89  | 0.00 | 1.79  | 1.72  | 0.00 | 1.79  |
| 5.19 | RPL21     | 89026818  | PREDICTED: similar to 60S ribosomal protein L21                          | Whole cell | 2 | 3.16  | 0.14 | 2.61  | 2.65  | 0.12 | 2.51  |
| 5.18 | EIF3A     | 4503509   | eukaryotic translation initiation factor 3, subunit 10 theta, 150/170kDa | Whole cell | 2 | 0.83  | 0.15 | 1.29  | 0.76  | 0.06 | 1.27  |
| 5.17 | ACAT2     | 5174389   | acetyl-Coenzyme A acetyltransferase 2                                    | Whole cell | 2 | 1.04  | 0.53 | 1.38  | 1.00  | 0.61 | 1.38  |
| 5.16 | EIF2S2    | 29826335  | eukaryotic translation initiation factor 2 beta                          | Whole cell | 2 | 0.52  | 0.35 | 2.09  | 0.50  | 0.33 | 2.09  |
| 5.15 | DYNLL1    | 83267868  | dynein light chain 1                                                     | Whole cell | 2 | 1.32  | 0.95 | 1.89  | 0.45  | 0.49 | 2.42  |
| 5.14 | SLC2A3    | 5902090   | solute carrier family 2 (facilitated glucose transporter), member 3      | Whole cell | 1 | 0.18  | 0.15 | 2.86  | 0.07  | 0.14 | 3.87  |
| 5.12 | RPL30     | 4506631   | ribosomal protein L30                                                    | Whole cell | 2 | 0.97  | 0.97 | 2.09  | 2.29  | 0.28 | 2.09  |
| 5.1  | SLC16A1   | 115583685 | solute carrier family 16, member 1                                       | Whole cell | 2 | 1.51  | 0.54 | 1.56  | 4.06  | 0.23 | 2.11  |
| 5.07 | SNRPD3    | 4759160   | small nuclear ribonucleoprotein polypeptide D3                           | Whole cell | 2 | 0.26  | 0.26 | 2.65  | 0.52  | 0.30 | 1.98  |
| 5.06 | CTSC      | 4503141   | cathepsin C isoform a preproprotein                                      | Whole cell | 2 | 0.45  | 0.26 | 1.50  | 0.52  | 0.27 | 1.46  |
| 5.01 | USP7      | 4507857   | ubiquitin specific protease 7 (herpes virus-associated)                  | Whole cell | 3 | 2.07  | 0.31 | 1.39  | 1.85  | 0.39 | 1.41  |
| 4.95 | SNRPA     | 4759156   | small nuclear ribonucleoprotein polypeptide A                            | Whole cell | 3 | 0.95  | 0.96 | 2.38  | 0.97  | 0.82 | 2.11  |
| 4.95 | RCC2      | 29789090  | RCC1-like                                                                | Whole cell | 2 | 3.28  | 0.34 | 1.71  | 3.28  | 0.32 | 1.69  |
| 4.94 | DDAH1     | 6912328   | dimethylarginine dimethylaminohydrolase 1                                | Whole cell | 2 | 4.17  | 0.17 | 2.09  | 4.29  | 0.17 | 2.09  |
| 4.93 | TBL3      | 19913369  | transducin beta-like 3                                                   | Whole cell | 2 | 1.50  | 0.39 | 1.38  | 1.16  | 0.71 | 1.61  |
| 4.89 | TEX10     | 8923269   | testis expressed sequence 10                                             | Whole cell | 3 | 0.94  | 0.79 | 4.45  | 1.43  | 0.25 | 4.45  |
| 4.88 | RPS17     | 4506693   | ribosomal protein S17                                                    | Whole cell | 2 | 0.86  | 0.32 | 1.25  | 0.91  | 0.49 | 1.22  |
| 4.87 | RPL24     | 4506619   | ribosomal protein L24                                                    | Whole cell | 2 | 1.10  | 0.84 | 19.59 | 0.93  | 0.89 | 19.23 |
| 4.87 | KIAA0368  | 122937211 | KIAA0368 protein                                                         | Whole cell | 2 | 0.41  | 0.27 | 2.09  | 0.27  | 0.19 | 2.11  |
| 4.8  | WDR12     | 16445424  | WD repeat domain 12 protein                                              | Whole cell | 2 | 2.11  | 0.40 | 1.75  | 2.31  | 0.37 | 1.42  |
| 4.78 | UTF1      | 71043876  | undifferentiated embryonic cell transcription factor 1                   | Whole cell | 2 | 14.72 | 0.02 | 3.77  | 16.00 | 0.02 | 3.73  |
| 4.75 | RPL28     | 13904866  | ribosomal protein L28                                                    | Whole cell | 3 | 0.60  | 0.02 | 1.92  | 0.74  | 0.12 | 1.91  |
| 4.73 | COX4I1    | 4502981   | cytochrome c oxidase subunit IV isoform 1                                | Whole cell | 2 | 2.63  | 0.37 | 1.77  | 2.61  | 0.34 | 1.72  |
| 4.7  | EIF3I     | 4503513   | eukaryotic translation initiation factor 3, subunit 2 beta, 36kDa        | Whole cell | 2 | 0.32  | 0.26 | 1.60  | 0.32  | 0.22 | 2.09  |
| 4.68 | MARCKSL1  | 13491174  | MARCKS-like 1                                                            | Whole cell | 3 | 0.84  | 0.63 | 1.77  | 1.42  | 0.27 | 1.98  |
| 4.67 | SMC1A     | 30581135  | structural maintenance of chromosomes 1A                                 | Whole cell | 2 | 0.65  | 0.48 | 2.09  | 0.94  | 0.91 | 2.09  |
| 4.66 | SFRS7     | 72534660  | splicing factor, arginine/serine-rich 7                                  | Whole cell | 3 | 0.32  | 0.21 | 2.09  | 0.43  | 0.28 | 2.09  |
| 4.64 | OPA1      | 18860845  | optic atrophy 1 isoform 8                                                | Whole cell | 2 | 0.79  | 0.86 | 4.13  | 1.02  | 0.64 | 3.91  |
| 4.63 | C14orf166 | 7706322   | homeobox prox 1                                                          | Whole cell | 2 | 0.39  | 0.93 | 4.88  | 0.98  | 0.60 | 4.57  |
| 4.63 | AKAP12    | 21493022  | A-kinase anchor protein 12 isoform 1                                     | Whole cell | 2 | 2.51  | 0.09 | 2.29  | 1.41  | 0.66 | 2.21  |
| 4.62 | EIF5B     | 84043963  | eukaryotic translation initiation factor 5B                              | Whole cell | 2 | 0.98  | 0.99 | 18.88 | 1.06  | 0.89 | 19.41 |
| 4.61 | RPL23     | 4506605   | ribosomal protein L23                                                    | Whole cell | 2 | 0.55  | 0.37 | 2.09  | 0.59  | 0.41 | 2.11  |
| 4.59 | ACAA2     | 5174429   | acetyl-coenzyme A acyltransferase 2                                      | Whole cell | 2 | 3.08  | 0.20 | 2.11  | 2.96  | 0.21 | 2.11  |
| 4.53 | CDC2      | 4502709   | cell division cycle 2 protein isoform 1                                  | Whole cell | 2 | 1.05  | 0.63 | 2.73  | 1.16  | 0.48 | 2.73  |
| 4.51 | LMNA      | 5031875   | lamin A/C isoform 2                                                      | Whole cell | 2 | 0.81  | 0.07 | 1.37  | 0.93  | 0.22 | 1.39  |
| 4.48 | RPS23     | 4506701   | ribosomal protein S23                                                    | Whole cell | 2 | 0.54  | 0.29 | 1.53  | 0.67  | 0.27 | 1.39  |
| 4.47 | COPB2     | 4758032   | coatamer protein complex, subunit beta 2 (beta prime)                    | Whole cell | 3 | 0.57  | 0.10 | 4.45  | 0.55  | 0.10 | 4.45  |
| 4.46 | MYL6      | 88999583  | myosin, light chain 6, alkali, smooth muscle and non-muscle isoform 2    | Whole cell | 2 | 1.18  | 0.40 | 1.94  | 1.13  | 0.25 | 1.94  |

|      |           |           |                                                                      |            |   |       |      |       |       |      |       |
|------|-----------|-----------|----------------------------------------------------------------------|------------|---|-------|------|-------|-------|------|-------|
| 4.44 | RANBP1    | 4506407   | RAN binding protein 1                                                | Whole cell | 2 | 1.06  | 0.97 | 1.82  | 1.11  | 0.30 | 2.40  |
| 4.43 | ATP5O     | 4502303   | mitochondrial ATP synthase, O subunit                                | Whole cell | 2 | 0.36  | 0.19 | 2.11  | 0.81  | 0.62 | 20.51 |
| 4.43 | LGALS1    | 4504981   | beta-galactoside-binding lectin                                      | Whole cell | 2 | 2.27  | 0.29 | 2.23  | 2.51  | 0.27 | 2.11  |
| 4.41 | EIF4G2    | 4503539   | eukaryotic translation initiation factor 4 gamma, 2 isoform 1        | Whole cell | 2 | 0.18  | 0.45 | 4.53  | 0.06  | 0.34 | 4.97  |
| 4.39 | FARSB     | 124028525 | phenylalanyl-tRNA synthetase, beta subunit                           | Whole cell | 2 | 0.34  | 0.44 | 2.01  | 0.24  | 0.34 | 2.27  |
| 4.37 | PNN       | 33356174  | pinin, desmosome associated protein                                  | Whole cell | 2 | 1.10  | 0.99 | 2.91  | 0.95  | 0.79 | 3.25  |
| 4.37 | NOP2      | 76150625  | nucleolar protein 1, 120kDa                                          | Whole cell | 2 | 0.55  | 0.31 | 2.33  | 0.40  | 0.20 | 2.11  |
| 4.35 | CARHSP1   | 109715858 | calcium-regulated heat-stable protein 1                              | Whole cell | 3 | 5.50  | 0.30 | 2.09  | 5.97  | 0.30 | 2.44  |
| 4.33 | FH        | 19743875  | fumarate hydratase                                                   | Whole cell | 2 | 0.95  | 0.72 | 1.29  | 1.09  | 0.90 | 1.42  |
| 4.32 | NOLC1     | 4758860   | nucleolar and coiled-body phosphoprotein 1                           | Whole cell | 2 | 1.09  | 0.84 | 2.61  | 1.18  | 0.86 | 3.50  |
| 4.31 | FEN1      | 4758356   | flap structure-specific endonuclease 1                               | Whole cell | 2 | 0.99  | 0.20 | 1.34  | 1.06  | 0.45 | 1.43  |
| 4.28 | H1FX      | 5174449   | H1 histone family, member X                                          | Whole cell | 2 | 1.03  | 0.78 | 2.19  | 1.12  | 0.57 | 2.19  |
| 4.27 | KPNA4     | 4504901   | karyopherin alpha 4                                                  | Whole cell | 2 | 2.54  | 0.25 | 2.09  | 2.61  | 0.24 | 2.09  |
| 4.27 | TNPO1     | 23510381  | transportin 1                                                        | Whole cell | 2 | 1.39  | 0.31 | 4.45  | 1.37  | 0.35 | 4.45  |
| 4.27 | THOC4     | 55770864  | THO complex 4                                                        | Whole cell | 2 | 0.60  | 0.29 | 2.00  | 0.57  | 0.24 | 2.13  |
| 4.24 | RBM14     | 5454064   | RNA binding motif protein 14                                         | Whole cell | 2 | 0.82  | 0.71 | 2.09  | 0.30  | 0.20 | 2.11  |
| 4.23 | PTPN11    | 33356177  | protein tyrosine phosphatase, non-receptor type 11                   | Whole cell | 2 | 0.37  | 0.24 | 2.11  | 0.24  | 0.17 | 2.09  |
| 4.22 | HK1       | 4504391   | hexokinase 1 isoform HK1                                             | Whole cell | 2 | 0.59  | 0.39 | 1.38  | 0.53  | 0.35 | 1.38  |
| 4.22 | MYBBP1A   | 7657351   | MYB binding protein 1a                                               | Whole cell | 2 | 0.54  | 0.36 | 2.09  | 0.56  | 0.38 | 2.09  |
| 4.19 | ADSS      | 34577063  | adenylosuccinate synthase                                            | Whole cell | 2 | 1.67  | 0.26 | 1.57  | 1.45  | 0.29 | 2.44  |
| 4.19 | PAK1      | 42794769  | p21-activated kinase 1                                               | Whole cell | 2 | 2.36  | 0.27 | 2.09  | 2.13  | 0.30 | 2.09  |
| 4.18 | GCS1      | 5453662   | mannosyl-oligosaccharide glucosidase                                 | Whole cell | 2 | 0.74  | 0.29 | 1.33  | 0.72  | 0.39 | 1.67  |
| 4.17 | NUTF2     | 5031985   | nuclear transport factor 2                                           | Whole cell | 2 | 2.33  | 0.32 | 3.60  | 3.19  | 0.21 | 1.66  |
| 4.17 | SFRS4     | 21361282  | splicing factor, arginine/serine-rich 4                              | Whole cell | 1 | 0.11  | 0.05 | 2.99  | 0.15  | 0.04 | 2.00  |
| 4.17 | DLAT      | 31711992  | dihydropyrimidinase S-acetyltransferase                              | Whole cell | 2 | 1.63  | 0.39 | 2.09  | 1.60  | 0.38 | 2.78  |
| 4.16 | COP2      | 4759264   | COP9 constitutive photomorphogenic homolog subunit 2                 | Whole cell | 2 | 1.09  | 0.84 | 1.45  | 1.16  | 0.78 | 1.41  |
| 4.16 | LRP1      | 126012562 | low density lipoprotein-related protein 1                            | Whole cell | 2 | 1.18  | 0.74 | 2.09  | 1.49  | 0.49 | 2.09  |
| 4.15 | LMNB2     | 27436951  | lamin B2                                                             | Whole cell | 2 | 0.90  | 0.66 | 2.03  | 0.72  | 0.39 | 2.27  |
| 4.14 | BGN       | 4502403   | biglycan preproprotein                                               | Whole cell | 2 | 10.38 | 0.12 | 1.94  | 11.48 | 0.11 | 1.84  |
| 4.12 | DNAJA1    | 4504511   | Dnaj (Hsp40) homolog, subfamily A, member 1                          | Whole cell | 2 | 0.26  | 0.20 | 1.77  | 0.39  | 0.26 | 2.42  |
| 4.12 | SUB1      | 19923784  | activated RNA polymerase II transcription cofactor 4                 | Whole cell | 2 | 1.21  | 0.62 | 1.38  | 1.25  | 0.59 | 1.38  |
| 4.12 | ACLY      | 38569423  | ATP citrate lyase isoform 2                                          | Whole cell | 2 | 1.50  | 0.38 | 2.81  | 2.01  | 0.25 | 2.11  |
| 4.12 | RRBP1     | 110611220 | ribosome binding protein 1                                           | Whole cell | 3 | 2.70  | 0.24 | 2.09  | 3.10  | 0.21 | 2.09  |
| 4.11 | TPD52L2   | 40805868  | tumor protein D52-like 2 isoform c                                   | Whole cell | 2 | 0.71  | 0.55 | 2.09  | 1.04  | 0.92 | 2.09  |
| 4.1  | PSMD12    | 4506221   | proteasome 26S non-ATPase subunit 12                                 | Whole cell | 2 | 1.61  | 0.43 | 2.09  | 1.92  | 0.35 | 3.63  |
| 4.1  | ERP29     | 5803013   | endoplasmic reticulum protein 29 isoform 1                           | Whole cell | 2 | 1.06  | 0.68 | 19.41 | 1.00  | 0.75 | 18.20 |
| 4.09 | IPO7      | 5453998   | importin 7                                                           | Whole cell | 3 | 4.61  | 0.40 | 2.01  | 3.37  | 0.51 | 1.92  |
| 4.08 | EIF2S1    | 4758256   | eukaryotic translation initiation factor 2, subunit 1 alpha, 35kDa   | Whole cell | 2 | 0.83  | 0.32 | 1.74  | 0.79  | 0.27 | 1.38  |
| 4.08 | MFG8      | 5174557   | milk fat globule-EGF factor 8 protein                                | Whole cell | 2 | 0.39  | 0.13 | 2.13  | 0.45  | 0.17 | 3.40  |
| 4.08 | MAPRE1    | 6912494   | microtubule-associated protein, RP/EB family, member 1               | Whole cell | 2 | 0.77  | 1.00 | 1.66  | 0.67  | 0.97 | 2.13  |
| 4.08 | PRPF19    | 7657381   | PRP19/PSO4 pre-mRNA processing factor 19 homolog                     | Whole cell | 3 | 1.89  | 0.39 | 1.26  | 2.13  | 0.35 | 1.26  |
| 4.08 | BAT3      | 18375634  | HLA-B associated transcript-3 isoform a                              | Whole cell | 2 | 0.97  | 0.98 | 2.09  | 1.07  | 0.88 | 2.09  |
| 4.08 | AIMP1     | 45006986  | small inducible cytokine subfamily E, member 1                       | Whole cell | 2 | 0.79  | 0.66 | 2.09  | 1.43  | 0.52 | 2.09  |
| 4.08 | TRIM71    | 84993742  | abnormal cell LiNeage LIN-41                                         | Whole cell | 2 | 0.81  | 0.79 | 2.51  | 0.81  | 0.74 | 2.01  |
| 4.08 | RAVER1    | 123173757 | RAVER1                                                               | Whole cell | 2 | 2.19  | 0.32 | 1.72  | 2.94  | 0.25 | 2.11  |
| 4.06 | EIF6      | 4504771   | integrin beta 4 binding protein isoform a                            | Whole cell | 2 | 2.40  | 0.34 | 1.71  | 3.08  | 0.25 | 2.07  |
| 4.06 | CDV3      | 8923710   | CDV3 homolog                                                         | Whole cell | 3 | 1.14  | 0.77 | 19.95 | 1.05  | 0.89 | 19.23 |
| 4.06 | PSMB4     | 22538467  | proteasome beta 4 subunit                                            | Whole cell | 2 | 1.15  | 0.77 | 2.09  | 1.14  | 0.79 | 2.09  |
| 4.06 | G3BP2     | 45359849  | Ras-GTPase activating protein SH3 domain-binding protein 2 isoform a | Whole cell | 3 | 0.96  | 0.99 | 2.09  | 0.91  | 0.78 | 2.09  |
| 4.05 | PDXK      | 4505701   | pyridoxal kinase                                                     | Whole cell | 2 | 1.39  | 0.51 | 3.40  | 0.99  | 1.00 | 2.09  |
| 4.05 | DRG1      | 4758796   | developmentally regulated GTP binding protein 1                      | Whole cell | 2 | 1.01  | 0.69 | 1.38  | 1.02  | 0.71 | 1.38  |
| 4.05 | TXNDC12   | 7705696   | endoplasmic reticulum thioredoxin superfamily member, 18 kDa         | Whole cell | 3 | 1.94  | 0.34 | 2.11  | 1.69  | 0.40 | 2.09  |
| 4.05 | DPP3      | 86792661  | dipeptidyl peptidase III                                             | Whole cell | 2 | 3.28  | 0.32 | 1.54  | 3.53  | 0.30 | 1.56  |
| 4.04 | ATP6V1E1  | 4502317   | vacuolar H+ ATPase E1 isoform a                                      | Whole cell | 2 | 1.58  | 0.44 | 2.68  | 1.41  | 0.36 | 2.73  |
| 4.04 | GSTO1     | 4758484   | glutathione-S-transferase omega 1                                    | Whole cell | 2 | 0.49  | 0.27 | 2.21  | 0.77  | 0.57 | 20.89 |
| 4.04 | HNRNPA0   | 5803036   | heterogeneous nuclear ribonucleoprotein A0                           | Whole cell | 3 | 3.22  | 0.27 | 1.66  | 3.22  | 0.28 | 1.42  |
| 4.04 | MCM6      | 7427519   | minichromosome maintenance deficient 6                               | Whole cell | 2 | 0.44  | 0.33 | 1.21  | 0.37  | 0.32 | 1.26  |
| 4.04 | POLR2H    | 14589953  | RNA polymerase II, polypeptide H                                     | Whole cell | 2 | 1.43  | 0.52 | 2.09  | 1.60  | 0.43 | 2.09  |
| 4.04 | MCM5      | 23510448  | minichromosome maintenance deficient protein 5                       | Whole cell | 2 | 1.03  | 0.95 | 2.09  | 1.14  | 0.79 | 2.11  |
| 4.04 | LOC646195 | 89035017  | PREDICTED: similar to 40S ribosomal protein S28 isoform 2            | Whole cell | 2 | 1.07  | 0.70 | 2.73  | 1.28  | 0.58 | 1.38  |
| 4.04 | PSPC1     | 109240550 | paraspeckle protein 1                                                | Whole cell | 2 | 0.88  | 0.78 | 1.31  | 1.05  | 0.95 | 1.42  |

|      |           |          |                                                                                       |            |    |       |      |       |       |      |       |
|------|-----------|----------|---------------------------------------------------------------------------------------|------------|----|-------|------|-------|-------|------|-------|
| 4.03 | ETFA      | 4503607  | electron transfer flavoprotein, alpha polypeptide                                     | Whole cell | 2  | 0.90  | 0.84 | 5.86  | 0.95  | 0.92 | 3.87  |
| 4.03 | GOT1      | 4504067  | aspartate aminotransferase 1                                                          | Whole cell | 2  | 1.60  | 0.34 | 2.11  | 1.92  | 0.26 | 3.13  |
| 4.03 | PSMB7     | 4506203  | proteasome beta 7 subunit proprotein                                                  | Whole cell | 2  | 1.64  | 0.44 | 2.09  | 1.74  | 0.39 | 2.09  |
| 4.03 | BAT1      | 4758112  | HLA-B associated transcript 1                                                         | Whole cell | 10 | 0.08  | 0.22 | 2.47  | 0.13  | 0.22 | 2.33  |
| 4.03 | CAPZA1    | 5453597  | F-actin capping protein alpha-1 subunit                                               | Whole cell | 2  | 3.60  | 0.45 | 2.31  | 2.88  | 0.48 | 3.19  |
| 4.03 | SNX2      | 23111038 | sorting nexin 2                                                                       | Whole cell | 2  | 0.21  | 0.18 | 1.39  | 0.25  | 0.20 | 1.38  |
| 4.03 | LOC283412 | 88987619 | PREDICTED: similar to 60S ribosomal protein L29                                       | Whole cell | 3  | 0.82  | 0.99 | 2.17  | 0.78  | 0.96 | 2.31  |
| 4.02 | GJA1      | 4504001  | connexin 43                                                                           | Whole cell | 2  | 2.73  | 0.24 | 4.83  | 3.02  | 0.21 | 2.09  |
| 4.02 | SLC2A1    | 5730051  | solute carrier family 2 (facilitated glucose transporter), member 1                   | Whole cell | 2  | 4.13  | 0.17 | 2.31  | 3.47  | 0.19 | 2.09  |
| 4.02 | BOLA2B    | 85797673 | bolA-like protein 2B                                                                  | Whole cell | 2  | 1.42  | 0.52 | 2.09  | 1.32  | 0.59 | 2.09  |
| 4.02 | DLD       | 91199540 | dihydropolipoamide dehydrogenase                                                      | Whole cell | 2  | 0.14  | 0.16 | 2.17  | 0.11  | 0.38 | 2.54  |
| 4.02 | VAPA      | 94721250 | vesicle-associated membrane protein-associated protein A isoform 1                    | Whole cell | 2  | 2.17  | 0.30 | 2.09  | 1.74  | 0.38 | 2.09  |
| 4.01 | PSMB5     | 4506201  | proteasome beta 5 subunit                                                             | Whole cell | 3  | 1.22  | 0.66 | 2.36  | 1.47  | 0.47 | 2.11  |
| 4.01 | TMEM43    | 13236587 | transmembrane protein 43                                                              | Whole cell | 2  | 0.27  | 0.19 | 1.80  | 0.34  | 0.22 | 1.58  |
| 4    | CYB5A     | 4503183  | cytochrome b-5 isoform 2                                                              | Whole cell | 2  | 1.06  | 0.87 | 1.25  | 1.24  | 0.57 | 1.36  |
| 4    | QDPR      | 4506359  | quinoid dihydropteridine reductase                                                    | Whole cell | 2  | 1.04  | 0.92 | 2.09  | 1.10  | 0.85 | 2.11  |
| 4    | RPL19     | 4506609  | ribosomal protein L19                                                                 | Whole cell | 3  | 1.02  | 0.71 | 1.64  | 0.91  | 0.79 | 1.43  |
| 4    | ARHGDI1A  | 4757768  | Rho GDP dissociation inhibitor (GDI) alpha                                            | Whole cell | 2  | 3.47  | 0.26 | 1.53  | 3.66  | 0.24 | 1.46  |
| 4    | TUBB2C    | 5174735  | tubulin, beta, 2                                                                      | Whole cell | 68 | 0.32  | 0.40 | 2.88  | 0.20  | 0.40 | 2.83  |
| 4    | CNPY2     | 7657176  | transmembrane protein 4                                                               | Whole cell | 2  | 14.06 | 0.16 | 4.70  | 14.72 | 0.15 | 4.74  |
| 4    | HN1       | 7705877  | hematological and neurological expressed 1 isoform 1                                  | Whole cell | 2  | 4.21  | 0.17 | 2.11  | 4.29  | 0.17 | 2.09  |
| 4    | LSM8      | 7706425  | U6 snRNA-associated Sm-like protein LSM8                                              | Whole cell | 2  | 3.53  | 0.98 | 2.23  | 2.63  | 0.69 | 2.13  |
| 4    | BCCIP     | 7706581  | BRCA2 and CDKN1A-interacting protein isoform BCCIPalpha                               | Whole cell | 2  | 2.00  | 0.24 | 2.29  | 1.84  | 0.24 | 2.75  |
| 4    | HMGB2     | 11321591 | high-mobility group box 2                                                             | Whole cell | 3  | 0.72  | 0.30 | 1.50  | 1.31  | 0.63 | 1.38  |
| 4    | PTMA      | 21359860 | prothymosin, alpha (gene sequence 28)                                                 | Whole cell | 9  | 2.99  | 0.22 | 1.46  | 3.37  | 0.22 | 1.28  |
| 4    | VSNL1     | 21361559 | visinin-like 1                                                                        | Whole cell | 2  | 1.82  | 0.35 | 2.09  | 1.91  | 0.33 | 5.70  |
| 4    | FAM49B    | 42734438 | hypothetical protein LOC51571                                                         | Whole cell | 2  | 1.39  | 0.54 | 2.09  | 0.88  | 0.81 | 2.09  |
| 4    | USP14     | 82880645 | ubiquitin specific protease 14 isoform b                                              | Whole cell | 2  | 0.88  | 0.82 | 2.09  | 0.75  | 0.61 | 2.09  |
| 4    | MTHFD2    | 94721354 | methylene tetrahydrofolate dehydrogenase 2 isoform A                                  | Whole cell | 2  | 3.94  | 0.18 | 2.09  | 4.57  | 0.16 | 2.11  |
| 3.99 | RAD23B    | 4506387  | UV excision repair protein RAD23 homolog B                                            | Whole cell | 2  | 1.09  | 0.53 | 1.61  | 0.97  | 0.92 | 1.43  |
| 3.98 | SAE1      | 4885585  | SUMO-1 activating enzyme subunit 1                                                    | Whole cell | 2  | 1.85  | 0.33 | 1.89  | 2.99  | 0.19 | 2.09  |
| 3.94 | PSMA3     | 4506183  | proteasome alpha 3 subunit isoform 1                                                  | Whole cell | 2  | 0.36  | 0.10 | 1.63  | 0.20  | 0.07 | 2.51  |
| 3.92 | ISYNA1    | 7705558  | myo-inositol 1-phosphate synthase A1                                                  | Whole cell | 2  | 0.93  | 0.85 | 1.22  | 0.99  | 0.84 | 1.20  |
| 3.89 | U2AF2     | 60279268 | U2 (RNU2) small nuclear RNA auxiliary factor 2 isoform b                              | Whole cell | 2  | 1.05  | 0.60 | 2.40  | 1.01  | 0.60 | 2.05  |
| 3.87 | PAFAH1B3  | 4505587  | platelet-activating factor acetylhydrolase, isoform 1b, gamma subunit 29kDa           | Whole cell | 3  | 0.22  | 0.16 | 2.09  | 0.34  | 0.22 | 2.11  |
| 3.85 | ARCN1     | 11863154 | archain                                                                               | Whole cell | 2  | 1.24  | 0.67 | 2.09  | 1.46  | 0.51 | 2.11  |
| 3.83 | LIG1      | 4557719  | DNA ligase I                                                                          | Whole cell | 2  | 2.05  | 0.32 | 2.11  | 2.03  | 0.32 | 2.11  |
| 3.81 | RBBP7     | 4506439  | retinoblastoma binding protein 7                                                      | Whole cell | 5  | 3.47  | 0.19 | 2.09  | 3.63  | 0.19 | 2.11  |
| 3.81 | UBE2I     | 4507785  | ubiquitin-conjugating enzyme E2I                                                      | Whole cell | 2  | 0.88  | 0.70 | 2.07  | 0.86  | 0.74 | 1.38  |
| 3.81 | RAC1      | 9845509  | ras-related G3 botulinum toxin substrate 1 isoform Rac1b                              | Whole cell | 2  | 0.87  | 0.76 | 19.77 | 1.18  | 0.66 | 20.32 |
| 3.79 | PPP1R12A  | 4505317  | protein phosphatase 1, regulatory (inhibitor) subunit 12A                             | Whole cell | 2  | 1.00  | 0.64 | 2.11  | 1.09  | 0.54 | 1.75  |
| 3.79 | DHCR24    | 13375618 | 24-dehydrocholesterol reductase                                                       | Whole cell | 2  | 0.83  | 0.57 | 1.31  | 0.86  | 0.58 | 1.25  |
| 3.77 | CSNK2A1   | 4503095  | casein kinase II alpha 1 subunit isoform a                                            | Whole cell | 1  | 4.13  | 0.22 | 2.49  | 3.16  | 0.37 | 2.33  |
| 3.77 | BCAS2     | 5031653  | breast carcinoma amplified sequence 2                                                 | Whole cell | 2  | 0.94  | 0.90 | 2.09  | 0.82  | 0.71 | 2.09  |
| 3.77 | COX2      | 58615666 | cytochrome c oxidase subunit II                                                       | Whole cell | 2  | 0.23  | 0.17 | 2.11  | 0.26  | 0.18 | 2.09  |
| 3.73 | RALY      | 8051631  | RNA binding protein (autoantigenic, hnRNP-associated with lethal yellow) long isoform | Whole cell | 2  | 0.83  | 1.00 | 1.53  | 0.89  | 0.92 | 1.27  |
| 3.73 | TMEM33    | 8922491  | transmembrane protein 33                                                              | Whole cell | 2  | 0.24  | 0.17 | 2.11  | 0.28  | 0.19 | 2.09  |
| 3.72 | RAB1A     | 4758988  | RAB1A, member RAS oncogene family                                                     | Whole cell | 6  | 0.29  | 0.20 | 2.11  | 0.33  | 0.21 | 2.11  |
| 3.71 | TUBB2A    | 4507729  | tubulin, beta 2                                                                       | Whole cell | 65 | 1.80  | 0.36 | 2.96  | 2.01  | 0.32 | 2.11  |
| 3.7  | VPS29     | 7706441  | vacuolar protein sorting 29 isoform 1                                                 | Whole cell | 2  | 0.54  | 0.28 | 2.09  | 0.60  | 0.33 | 2.09  |
| 3.7  | HN1L      | 21700763 | chromosome 16 open reading frame 34                                                   | Whole cell | 3  | 1.27  | 0.64 | 2.09  | 1.31  | 0.61 | 2.09  |
| 3.7  | CDC42     | 89903012 | cell division cycle 42 isoform 1                                                      | Whole cell | 2  | 5.75  | 0.14 | 2.83  | 6.73  | 0.14 | 2.99  |
| 3.65 | MAGOHB    | 8922331  | mag0-nashi homolog 2                                                                  | Whole cell | 1  | 1.54  | 0.28 | 1.38  | 1.39  | 0.32 | 1.38  |
| 3.57 | DNAJB1    | 5453690  | Dnaj (Hsp40) homolog, subfamily B, member 1                                           | Whole cell | 2  | 0.83  | 0.57 | 2.11  | 0.79  | 0.48 | 2.51  |
| 3.56 | TIMM44    | 33636719 | translocase of inner mitochondrial membrane 44                                        | Whole cell | 2  | 1.16  | 0.62 | 20.14 | 0.95  | 0.91 | 19.05 |
| 3.54 | THOP1     | 4507491  | thimet oligopeptidase 1                                                               | Whole cell | 2  | 3.02  | 0.21 | 2.09  | 2.44  | 0.26 | 2.09  |
| 3.54 | SMARCA5   | 21071058 | SWI/SNF-related matrix-associated actin-dependent regulator of chromatin a5           | Whole cell | 1  | 0.04  | 0.02 | 7.11  | 0.08  | 0.03 | 5.30  |
| 3.53 | CTTN      | 20357556 | cortactin isoform b                                                                   | Whole cell | 2  | 2.56  | 0.25 | 2.09  | 2.58  | 0.25 | 2.11  |
| 3.53 | BTF3L4    | 56847620 | transcription factor BTF3-like                                                        | Whole cell | 2  | 1.12  | 0.84 | 1.25  | 1.13  | 0.80 | 2.01  |
| 3.53 | RPL9      | 67944630 | ribosomal protein L9                                                                  | Whole cell | 1  | 0.40  | 0.35 | 1.47  | 0.50  | 0.61 | 2.31  |
| 3.5  | S100A10   | 4506761  | S100 calcium binding protein A10                                                      | Whole cell | 1  | 2.42  | 0.22 | 1.43  | 2.03  | 0.24 | 3.40  |

|      |           |           |                                                                  |            |   |      |      |       |      |      |       |
|------|-----------|-----------|------------------------------------------------------------------|------------|---|------|------|-------|------|------|-------|
| 3.47 | RPS24     | 4506703   | ribosomal protein S24 isoform c                                  | Whole cell | 5 | 1.00 | 0.89 | 1.50  | 1.13 | 0.79 | 1.39  |
| 3.47 | CLASP1    | 31563537  | CLIP-associating protein 1                                       | Whole cell | 1 | 0.90 | 0.72 | 4.45  | 0.61 | 0.16 | 4.45  |
| 3.46 | FADS2     | 4758334   | fatty acid desaturase 2                                          | Whole cell | 2 | 1.25 | 0.66 | 2.09  | 1.17 | 0.75 | 2.09  |
| 3.43 | LOC643752 | 88983788  | PREDICTED: similar to RAS related protein 1b                     | Whole cell | 2 | 2.96 | 0.06 | 29.65 | 3.37 | 0.05 | 30.20 |
| 3.42 | VTN       | 88853069  | vitronectin                                                      | Whole cell | 2 | 0.44 | 0.29 | 2.11  | 0.47 | 0.31 | 2.09  |
| 3.4  | ENOPH1    | 10864017  | E-1 enzyme                                                       | Whole cell | 2 | 0.71 | 0.48 | 2.11  | 0.77 | 0.57 | 2.11  |
| 3.39 | PSMD5     | 4826952   | proteasome 26S non-ATPase subunit 5                              | Whole cell | 1 | 1.10 | 0.84 | 2.09  | 0.93 | 0.90 | 2.09  |
| 3.39 | FAT3      | 89035055  | PREDICTED: similar to fat3                                       | Whole cell | 1 | 1.27 | 0.11 | 2.19  | 1.29 | 0.11 | 1.60  |
| 3.35 | RPS6KA1   | 55743134  | ribosomal protein S6 kinase, 90kDa, polypeptide 1 isoform b      | Whole cell | 2 | 1.12 | 0.81 | 2.09  | 1.10 | 0.83 | 2.09  |
| 3.3  | SUPT16H   | 6005757   | chromatin-specific transcription elongation factor large subunit | Whole cell | 1 | 1.01 | 0.93 | 19.05 | 0.96 | 0.93 | 19.05 |
| 3.29 | EIF4E     | 4503535   | eukaryotic translation initiation factor 4E                      | Whole cell | 1 | 4.17 | 0.17 | 2.09  | 3.02 | 0.22 | 2.11  |
| 3.29 | ALDH9A1   | 115387104 | aldehyde dehydrogenase 9A1                                       | Whole cell | 1 | 1.19 | 0.70 | 1.38  | 1.26 | 0.61 | 1.38  |
| 3.28 | UMPS      | 4507835   | uridine monophosphate synthase                                   | Whole cell | 1 | 0.95 | 0.95 | 2.09  | 0.70 | 0.54 | 2.09  |
| 3.27 | PDZD2     | 87196343  | PDZ domain containing 2                                          | Whole cell | 1 | 2.23 | 0.29 | 2.09  | 2.58 | 0.25 | 2.09  |
| 3.25 | OXS1      | 4826878   | oxidative-stress responsive 1                                    | Whole cell | 1 | 0.47 | 0.07 | 1.31  | 0.72 | 0.19 | 1.67  |
| 3.23 | SPARC     | 4507171   | secreted protein, acidic, cysteine-rich (osteonectin)            | Whole cell | 1 | 2.78 | 0.55 | 2.38  | 1.41 | 0.31 | 2.33  |
| 3.23 | PPP2R4    | 30065645  | protein phosphatase 2A, regulatory subunit B' isoform a          | Whole cell | 1 | 0.31 | 0.20 | 2.11  | 0.34 | 0.22 | 3.22  |
| 3.23 | NSUN2     | 39995082  | NOL1/NOP2/Sun domain family 2 protein                            | Whole cell | 1 | 1.12 | 0.81 | 2.09  | 0.55 | 0.38 | 2.09  |
| 3.22 | ACACA     | 38679960  | acetyl-Coenzyme A carboxylase alpha isoform 1                    | Whole cell | 1 | 7.73 | 0.13 | 31.33 | 7.05 | 0.14 | 28.05 |
| 3.2  | CARS      | 62240992  | cysteinyl-tRNA synthetase isoform c                              | Whole cell | 1 | 0.79 | 0.62 | 2.09  | 0.72 | 0.52 | 2.11  |
| 3.16 | RBM12     | 23510462  | RNA binding motif protein 12                                     | Whole cell | 1 | 0.30 | 0.15 | 2.09  | 0.25 | 0.13 | 2.09  |
| 3.15 | NDUFS3    | 4758788   | NADH dehydrogenase (ubiquinone) Fe-S protein 3, 30kDa            | Whole cell | 1 | 0.83 | 0.74 | 2.09  | 0.51 | 0.33 | 2.09  |
| 3.15 | TMOD3     | 7657649   | tropomodulin 3 (ubiquitous)                                      | Whole cell | 1 | 1.25 | 0.32 | 3.16  | 0.99 | 0.64 | 15.85 |
| 3.11 | RRP1B     | 57863269  | hypothetical protein LOC23076                                    | Whole cell | 1 | 1.20 | 0.71 | 2.09  | 1.33 | 0.59 | 2.09  |
| 3.09 | ANP32E    | 13569879  | acidic (leucine-rich) nuclear phosphoprotein 32 family, member E | Whole cell | 2 | 1.17 | 0.85 | 1.19  | 1.12 | 0.86 | 1.24  |
| 3.08 | RPL34     | 16117789  | ribosomal protein L34                                            | Whole cell | 1 | 0.82 | 0.22 | 1.41  | 0.89 | 0.31 | 2.56  |
| 3.08 | HNRNPAB   | 55956921  | heterogeneous nuclear ribonucleoprotein AB isoform b             | Whole cell | 2 | 1.80 | 0.47 | 1.32  | 1.92 | 0.44 | 1.27  |
| 3.06 | NANS      | 12056473  | N-acetylneuraminic acid phosphate synthase                       | Whole cell | 1 | 1.03 | 0.95 | 2.09  | 0.85 | 0.76 | 2.09  |
| 3.06 | SFRS2     | 47271443  | splicing factor, arginine/serine-rich 2                          | Whole cell | 1 | 0.65 | 0.48 | 2.09  | 0.77 | 0.63 | 2.09  |
| 3.05 | RCN2      | 4506457   | reticulocalbin 2, EF-hand calcium binding domain                 | Whole cell | 2 | 1.49 | 0.12 | 1.38  | 1.22 | 0.34 | 3.70  |
| 3.03 | RARS      | 15149476  | arginyl-tRNA synthetase                                          | Whole cell | 1 | 1.01 | 0.38 | 4.06  | 0.95 | 0.79 | 3.80  |
| 3.03 | GRPEL1    | 24308295  | GrpE-like 1, mitochondrial                                       | Whole cell | 1 | 1.98 | 0.38 | 1.24  | 2.15 | 0.38 | 1.25  |
| 3.02 | HNRNPF    | 4826760   | heterogeneous nuclear ribonucleoprotein F                        | Whole cell | 3 | 1.04 | 0.92 | 2.09  | 1.06 | 0.90 | 2.09  |
| 3.02 | MLEC      | 7661948   | hypothetical protein LOC9761                                     | Whole cell | 1 | 0.82 | 0.46 | 1.94  | 0.87 | 0.35 | 1.92  |
| 3.02 | RBM25     | 55741709  | RNA binding motif protein 25                                     | Whole cell | 1 | 0.94 | 0.88 | 2.31  | 1.08 | 0.96 | 2.42  |
| 2.99 | RPL32     | 55743130  | ribosomal protein L32                                            | Whole cell | 1 | 0.10 | 0.20 | 2.44  | 0.12 | 0.21 | 2.42  |
| 2.99 | KTN1      | 118498362 | kinectin 1 isoform b                                             | Whole cell | 1 | 0.92 | 0.87 | 2.09  | 0.98 | 0.98 | 2.96  |
| 2.97 | TOP1      | 11225260  | DNA topoisomerase I                                              | Whole cell | 1 | 0.88 | 0.81 | 2.09  | 0.84 | 0.74 | 2.09  |
| 2.96 | SR140     | 122937227 | U2-associated SR140 protein                                      | Whole cell | 1 | 0.99 | 0.06 | 18.88 | 5.45 | 0.05 | 31.33 |
| 2.95 | MTAP      | 47132622  | 5'-methylthioadenosine phosphorylase                             | Whole cell | 1 | 1.36 | 0.56 | 2.09  | 1.14 | 0.72 | 2.61  |
| 2.94 | SRRT      | 58331218  | arsenate resistance protein ARS2 isoform a                       | Whole cell | 1 | 1.04 | 0.86 | 19.23 | 1.12 | 0.68 | 19.77 |
| 2.92 | METAP2    | 5803092   | methionyl aminopeptidase 2                                       | Whole cell | 1 | 0.38 | 0.25 | 1.87  | 0.47 | 0.35 | 2.11  |
| 2.91 | SNRPB     | 4507125   | small nuclear ribonucleoprotein polypeptide B/B' isoform B       | Whole cell | 1 | 0.26 | 0.18 | 2.09  | 0.34 | 0.22 | 2.09  |
| 2.9  | RTN4      | 24431935  | reticulin 4 isoform A                                            | Whole cell | 1 | 2.13 | 0.30 | 2.11  | 2.00 | 0.32 | 2.09  |
| 2.88 | RPA1      | 4506583   | replication protein A1, 70kDa                                    | Whole cell | 2 | 2.38 | 0.27 | 2.09  | 1.84 | 0.36 | 2.09  |
| 2.88 | C21orf33  | 5031691   | es1 protein isoform la                                           | Whole cell | 1 | 1.07 | 0.65 | 19.41 | 0.99 | 0.84 | 18.88 |
| 2.87 | MESDC2    | 74136552  | mesoderm development candidate 2                                 | Whole cell | 1 | 2.36 | 0.27 | 2.11  | 2.29 | 0.28 | 2.09  |
| 2.86 | PRSS3     | 21536452  | mesotrypsin preproprotein                                        | Whole cell | 1 | 0.58 | 0.40 | 2.09  | 0.54 | 0.37 | 2.09  |
| 2.86 | S100A13   | 66737374  | S100 calcium binding protein A13                                 | Whole cell | 1 | 0.99 | 0.97 | 1.42  | 1.17 | 0.74 | 1.51  |
| 2.86 | DNAJC8    | 112293277 | Dnaj (Hsp40) homolog, subfamily C, member 8                      | Whole cell | 1 | 2.09 | 0.29 | 2.09  | 2.23 | 0.26 | 2.09  |
| 2.85 | TP53BP1   | 5032189   | tumor protein p53 binding protein, 1                             | Whole cell | 1 | 0.98 | 0.94 | 18.03 | 1.01 | 0.93 | 5.40  |
| 2.84 | RPA2      | 4506585   | replication protein A2, 32kDa                                    | Whole cell | 1 | 0.56 | 0.38 | 2.09  | 0.56 | 0.34 | 2.19  |
| 2.84 | WDR5      | 16554629  | WD repeat domain 5                                               | Whole cell | 1 | 1.11 | 0.80 | 2.56  | 1.12 | 0.79 | 2.09  |
| 2.83 | HDAC2     | 116284376 | histone deacetylase 2                                            | Whole cell | 1 | 1.08 | 0.87 | 2.09  | 1.10 | 0.84 | 2.09  |
| 2.8  | MKI67IP   | 21314753  | MKI67 (FHA domain) interacting nucleolar phosphoprotein          | Whole cell | 1 | 2.23 | 0.28 | 2.11  | 1.60 | 0.38 | 2.19  |
| 2.74 | CHMP4B    | 28827795  | chromatin modifying protein 4B                                   | Whole cell | 1 | 3.05 | 0.21 | 2.09  | 2.83 | 0.23 | 2.09  |
| 2.72 | RPL22L1   | 113415381 | PREDICTED: similar to ribosomal protein L22 like 1               | Whole cell | 1 | 0.72 | 0.52 | 1.39  | 0.73 | 0.49 | 1.82  |
| 2.67 | NLN       | 14149738  | neurolysin                                                       | Whole cell | 1 | 0.93 | 0.89 | 19.23 | 1.02 | 0.93 | 19.05 |
| 2.67 | DIAPH1    | 119395758 | diaphanous 1 isoform 1                                           | Whole cell | 1 | 0.52 | 0.35 | 2.09  | 0.83 | 0.73 | 2.09  |
| 2.65 | CHD4      | 51599156  | chromodomain helicase DNA binding protein 4                      | Whole cell | 0 | 0.82 | 0.71 | 2.09  | 1.01 | 0.98 | 2.09  |
| 2.64 | RAB7A     | 34147513  | RAB7, member RAS oncogene family                                 | Whole cell | 1 | 1.18 | 0.80 | 2.73  | 1.41 | 0.22 | 2.19  |

|      |           |           |                                                                                         |            |   |       |      |       |       |      |       |
|------|-----------|-----------|-----------------------------------------------------------------------------------------|------------|---|-------|------|-------|-------|------|-------|
| 2.63 | LPP       | 5031887   | LIM domain containing preferred translocation partner in lipoma                         | Whole cell | 1 | 3.66  | 0.19 | 2.58  | 2.94  | 0.22 | 4.83  |
| 2.63 | CPSF6     | 5901928   | cleavage and polyadenylation specific factor 6, 68 kD subunit                           | Whole cell | 1 | 0.54  | 0.34 | 18.20 | 0.39  | 0.24 | 2.11  |
| 2.63 | MDN1      | 24415404  | MDN1, midasin homolog                                                                   | Whole cell | 1 | 1.46  | 0.50 | 2.09  | 1.19  | 0.71 | 2.09  |
| 2.63 | DBI       | 120433593 | diazepam binding inhibitor isoform 2                                                    | Whole cell | 2 | 0.34  | 0.22 | 2.09  | 0.29  | 0.20 | 2.11  |
| 2.62 | EIF2S3    | 4503507   | eukaryotic translation initiation factor 2, subunit 3 gamma, 52kDa                      | Whole cell | 1 | 0.44  | 0.26 | 2.09  | 0.55  | 0.35 | 2.11  |
| 2.62 | AP2A1     | 19913416  | adaptor-related protein complex 2, alpha 1 subunit isoform 2                            | Whole cell | 1 | 1.49  | 0.49 | 2.09  | 1.58  | 0.44 | 2.09  |
| 2.6  | CAB39     | 7706481   | calcium binding protein 39                                                              | Whole cell | 1 | 0.35  | 0.23 | 2.11  | 0.38  | 0.25 | 2.11  |
| 2.59 | EIF3E     | 4503521   | eukaryotic translation initiation factor 3, subunit 6 48kDa                             | Whole cell | 1 | 0.84  | 0.75 | 1.66  | 0.69  | 0.40 | 1.38  |
| 2.59 | FKBP3     | 4503727   | FK506-binding protein 3                                                                 | Whole cell | 1 | 1.26  | 0.96 | 1.38  | 1.31  | 0.80 | 1.39  |
| 2.59 | SLC25A13  | 7657581   | solute carrier family 25, member 13 (citrin)                                            | Whole cell | 1 | 0.94  | 0.90 | 2.09  | 0.77  | 0.64 | 2.09  |
| 2.56 | CLTA      | 6005993   | clathrin, light polypeptide A isoform b                                                 | Whole cell | 1 | 0.33  | 0.17 | 2.09  | 0.34  | 0.18 | 2.09  |
| 2.56 | MKI67     | 103472005 | antigen identified by monoclonal antibody Ki-67                                         | Whole cell | 1 | 0.80  | 0.68 | 2.09  | 0.78  | 0.65 | 2.09  |
| 2.56 | BZW1      | 113414197 | PREDICTED: similar to basic leucine zipper and W2 domains 1                             | Whole cell | 1 | 0.63  | 0.45 | 2.09  | 0.60  | 0.43 | 2.11  |
| 2.55 | NCAPD2    | 41281521  | chromosome condensation-related SMC-associated protein 1                                | Whole cell | 1 | 0.62  | 0.44 | 2.09  | 0.58  | 0.40 | 2.09  |
| 2.54 | TCEA1     | 5803191   | transcription elongation factor A 1 isoform 1                                           | Whole cell | 1 | 0.50  | 0.33 | 2.09  | 0.36  | 0.23 | 2.09  |
| 2.54 | COGP      | 11559929  | coatamer protein complex, subunit gamma 1                                               | Whole cell | 1 | 1.24  | 0.67 | 2.09  | 0.65  | 0.48 | 2.09  |
| 2.54 | CYC1      | 21359867  | cytochrome c-1                                                                          | Whole cell | 1 | 0.65  | 0.13 | 2.54  | 0.69  | 0.16 | 2.40  |
| 2.54 | MAP3K1    | 113417068 | PREDICTED: similar to Mitogen-activated protein kinase kinase kinase 1                  | Whole cell | 1 | 0.21  | 0.16 | 2.09  | 0.36  | 0.23 | 2.09  |
| 2.53 | AIMP2     | 11125770  | JTV1                                                                                    | Whole cell | 1 | 0.20  | 0.15 | 2.13  | 0.25  | 0.18 | 2.11  |
| 2.53 | LOC441246 | 89026059  | PREDICTED: similar to 60S ribosomal protein L35 isoform 5                               | Whole cell | 1 | 0.85  | 0.64 | 2.11  | 0.89  | 0.70 | 2.09  |
| 2.5  | COX5B     | 17017988  | cytochrome c oxidase subunit Vb                                                         | Whole cell | 1 | 0.26  | 0.18 | 2.11  | 0.27  | 0.19 | 2.11  |
| 2.49 | LRRCA0    | 21361633  | leucine rich repeat containing 40                                                       | Whole cell | 1 | 0.31  | 0.21 | 2.09  | 0.27  | 0.19 | 2.09  |
| 2.49 | FERMT2    | 29789006  | pleckstrin homology domain containing, family C (with FERM domain) member 1             | Whole cell | 1 | 4.97  | 0.24 | 2.88  | 5.55  | 0.23 | 1.94  |
| 2.49 | TMED9     | 39725636  | transmembrane emp24 protein transport domain containing 9                               | Whole cell | 2 | 0.82  | 0.71 | 2.09  | 0.63  | 0.45 | 2.09  |
| 2.49 | TJP2      | 42518070  | tight junction protein 2 (zona occludens 2) isoform 1                                   | Whole cell | 1 | 1.47  | 0.49 | 2.09  | 1.43  | 0.52 | 2.09  |
| 2.48 | LOC729362 | 113422288 | PREDICTED: similar to large subunit ribosomal protein L36a                              | Whole cell | 1 | 0.15  | 0.13 | 2.09  | 0.25  | 0.18 | 2.11  |
| 2.44 | COL11A1   | 98985810  | alpha 1 type XI collagen isoform B preproprotein                                        | Whole cell | 1 | 0.56  | 0.18 | 24.66 | 7.94  | 0.13 | 31.92 |
| 2.41 | GNAI3     | 5729850   | guanine nucleotide binding protein (G protein), alpha inhibiting activity polypeptide 3 | Whole cell | 1 | 0.47  | 0.14 | 2.96  | 0.42  | 0.11 | 6.19  |
| 2.41 | SAFB      | 21264343  | scaffold attachment factor B                                                            | Whole cell | 1 | 1.92  | 0.33 | 4.21  | 1.05  | 0.92 | 19.23 |
| 2.41 | EIF3B     | 83367072  | eukaryotic translation initiation factor 3, subunit 9 eta, 116kDa                       | Whole cell | 1 | 0.64  | 0.85 | 2.73  | 0.54  | 0.81 | 2.73  |
| 2.4  | DNAJA2    | 5031741   | Dnal subfamily A member 2                                                               | Whole cell | 1 | 0.61  | 0.35 | 7.38  | 0.44  | 0.24 | 5.30  |
| 2.4  | DDX20     | 14251212  | DEAD (Asp-Glu-Ala-Asp) box polypeptide 20                                               | Whole cell | 1 | 1.69  | 0.40 | 2.09  | 1.45  | 0.51 | 2.09  |
| 2.4  | DIS3      | 19923416  | KIAA1008                                                                                | Whole cell | 1 | 1.94  | 0.33 | 2.09  | 1.94  | 0.34 | 2.09  |
| 2.39 | GLG1      | 54633312  | golgi apparatus protein 1                                                               | Whole cell | 1 | 0.61  | 0.44 | 2.11  | 0.74  | 0.60 | 2.09  |
| 2.38 | EDF1      | 4503453   | endothelial differentiation-related factor 1 isoform alpha                              | Whole cell | 1 | 1.94  | 0.29 | 2.09  | 1.91  | 0.29 | 2.09  |
| 2.38 | PSME3     | 30410796  | proteasome activator subunit 3 isoform 2                                                | Whole cell | 1 | 0.67  | 0.61 | 4.21  | 0.77  | 0.64 | 1.42  |
| 2.38 | ZC3H15    | 118150660 | erythropoietin 4 immediate early response                                               | Whole cell | 1 | 0.96  | 0.96 | 2.09  | 1.01  | 0.98 | 2.09  |
| 2.37 | YKT6      | 5730120   | YKT6 v-SNARE protein                                                                    | Whole cell | 1 | 0.99  | 1.00 | 1.39  | 1.01  | 0.93 | 2.75  |
| 2.36 | RGN1      | 4506455   | reticulocalbin 1                                                                        | Whole cell | 1 | 1.04  | 0.92 | 19.23 | 0.95  | 0.92 | 19.23 |
| 2.35 | PFKP      | 11321601  | phosphofructokinase, platelet                                                           | Whole cell | 1 | 3.84  | 0.18 | 2.09  | 3.50  | 0.19 | 2.09  |
| 2.34 | INO80     | 38708321  | INO80 complex homolog 1                                                                 | Whole cell | 1 | 1.17  | 0.75 | 2.11  | 1.18  | 0.73 | 2.09  |
| 2.33 | HSD17B4   | 4504505   | hydroxysteroid (17-beta) dehydrogenase 4                                                | Whole cell | 1 | 0.69  | 0.46 | 2.09  | 0.70  | 0.46 | 2.09  |
| 2.32 | RPS21     | 4506699   | ribosomal protein S21                                                                   | Whole cell | 1 | 0.46  | 0.30 | 2.09  | 0.41  | 0.27 | 2.11  |
| 2.31 | HMGCS1    | 54020720  | 3-hydroxy-3-methylglutaryl-Coenzyme A synthase 1 (soluble)                              | Whole cell | 2 | 1.03  | 0.94 | 2.09  | 1.46  | 0.51 | 2.11  |
| 2.3  | IDE       | 4826770   | insulysin                                                                               | Whole cell | 1 | 1.20  | 0.70 | 20.51 | 0.76  | 0.61 | 20.89 |
| 2.3  | CPOX      | 41393599  | coproporphyrinogen oxidase                                                              | Whole cell | 1 | 0.95  | 0.89 | 19.23 | 1.07  | 0.82 | 19.41 |
| 2.3  | ABCF1     | 69354671  | ATP-binding cassette, sub-family F, member 1 isoform a                                  | Whole cell | 1 | 26.30 | 0.17 | 15.42 | 27.54 | 0.19 | 16.00 |
| 2.29 | DDX6      | 4758140   | DEAD (Asp-Glu-Ala-Asp) box polypeptide 6                                                | Whole cell | 1 | 5.50  | 0.14 | 1.41  | 5.86  | 0.14 | 1.41  |
| 2.29 | PAC3IN3   | 19224660  | protein kinase C and casein kinase substrate in neurons 3                               | Whole cell | 1 | 1.07  | 0.88 | 2.09  | 0.96  | 0.96 | 2.09  |
| 2.29 | PRPF6     | 40807485  | PRP6 pre-mRNA processing factor 6 homolog                                               | Whole cell | 1 | 1.33  | 0.59 | 2.09  | 1.58  | 0.44 | 2.09  |
| 2.29 | MIA3      | 88952764  | PREDICTED: similar to melanoma inhibitory activity 3 isoform 1                          | Whole cell | 1 | 1.79  | 0.37 | 2.09  | 1.80  | 0.37 | 2.11  |
| 2.28 | CD9       | 4502693   | CD9 antigen                                                                             | Whole cell | 1 | 0.62  | 0.44 | 2.11  | 0.65  | 0.48 | 2.09  |
| 2.28 | ZMYND8    | 34335262  | zinc finger, MYND-type containing 8 isoform a                                           | Whole cell | 1 | 1.17  | 0.65 | 2.09  | 1.46  | 0.43 | 2.11  |
| 2.27 | LAMA3     | 38045910  | laminin alpha 3 subunit isoform 1                                                       | Whole cell | 1 | 0.25  | 0.18 | 2.09  | 0.26  | 0.18 | 2.09  |
| 2.27 | CKAP5     | 57222563  | colonic and hepatic tumor over-expressed protein isoform b                              | Whole cell | 1 | 0.94  | 0.90 | 6.49  | 0.97  | 0.97 | 11.27 |
| 2.26 | SRPRB     | 14917113  | signal recognition particle receptor, beta subunit                                      | Whole cell | 1 | 0.97  | 0.97 | 2.09  | 0.98  | 0.98 | 2.09  |
| 2.26 | HK2       | 15553127  | hexokinase 2                                                                            | Whole cell | 1 | 1.08  | 0.58 | 4.45  | 1.19  | 0.71 | 4.21  |
| 2.26 | LOC732055 | 113413782 | PREDICTED: hypothetical protein                                                         | Whole cell | 1 | 1.09  | 0.85 | 2.09  | 0.81  | 0.70 | 2.09  |
| 2.25 | LUC7L3    | 52426743  | cisplatin resistance-associated overexpressed protein                                   | Whole cell | 1 | 1.69  | 0.40 | 2.09  | 0.74  | 0.60 | 2.11  |
| 2.24 | TPT1      | 4507669   | tumor protein, translationally-controlled 1                                             | Whole cell | 2 | 1.04  | 0.28 | 19.23 | 1.08  | 0.29 | 19.59 |
| 2.24 | LRRCS9    | 40254924  | leucine rich repeat containing 59                                                       | Whole cell | 1 | 0.37  | 0.43 | 1.91  | 0.68  | 0.62 | 1.69  |

|      |           |           |                                                                               |            |   |      |      |       |      |      |       |
|------|-----------|-----------|-------------------------------------------------------------------------------|------------|---|------|------|-------|------|------|-------|
| 2.23 | PFKM      | 4505749   | phosphofructokinase, muscle                                                   | Whole cell | 3 | 1.13 | 0.64 | 4.29  | 1.63 | 0.38 | 2.09  |
| 2.23 | TRIP13    | 11321607  | thyroid hormone receptor interactor 13                                        | Whole cell | 1 | 1.32 | 0.60 | 2.09  | 1.09 | 0.86 | 2.09  |
| 2.23 | CNOT1     | 42716275  | CCR4-NOT transcription complex, subunit 1 isoform a                           | Whole cell | 1 | 1.10 | 0.84 | 2.09  | 0.84 | 0.74 | 2.09  |
| 2.23 | MAP6      | 48375173  | microtubule-associated protein 6 isoform 1                                    | Whole cell | 1 | 0.93 | 0.71 | 1.77  | 0.73 | 0.97 | 2.00  |
| 2.23 | LUC7L2    | 116812577 | LUC7-like 2                                                                   | Whole cell | 1 | 0.45 | 0.13 | 2.19  | 0.49 | 0.29 | 2.19  |
| 2.22 | TPP2      | 4507657   | tripeptidyl peptidase II                                                      | Whole cell | 1 | 0.97 | 0.97 | 2.09  | 1.18 | 0.73 | 2.09  |
| 2.22 | DAG1      | 4758116   | dystroglycan 1                                                                | Whole cell | 1 | 1.74 | 0.39 | 2.11  | 1.64 | 0.42 | 2.09  |
| 2.22 | GNL2      | 7019419   | guanine nucleotide binding protein-like 2 (nucleolar)                         | Whole cell | 1 | 1.28 | 0.62 | 2.09  | 1.04 | 0.93 | 2.09  |
| 2.21 | THRAP3    | 4827040   | thyroid hormone receptor associated protein 3                                 | Whole cell | 1 | 0.82 | 0.71 | 2.09  | 0.72 | 0.57 | 2.09  |
| 2.21 | CYFIP1    | 24307969  | cytoplasmic FMR1 interacting protein 1 isoform a                              | Whole cell | 1 | 1.25 | 0.67 | 2.09  | 1.13 | 0.80 | 2.09  |
| 2.21 | TBCB      | 50428925  | cytoskeleton associated protein 1                                             | Whole cell | 1 | 1.54 | 0.46 | 2.09  | 2.00 | 0.33 | 2.11  |
| 2.21 | CPSF1     | 56676371  | cleavage and polyadenylation specific factor 1, 160kDa                        | Whole cell | 1 | 2.33 | 0.27 | 2.09  | 1.72 | 0.39 | 2.09  |
| 2.2  | RAB11B    | 4758986   | RAB11B, member RAS oncogene family                                            | Whole cell | 1 | 1.06 | 0.48 | 1.33  | 1.12 | 0.37 | 1.47  |
| 2.2  | ELAC2     | 21359941  | elaC homolog 2                                                                | Whole cell | 1 | 1.77 | 0.38 | 2.11  | 1.89 | 0.35 | 2.11  |
| 2.2  | NUP93     | 41281437  | nucleoporin 93kDa                                                             | Whole cell | 1 | 0.40 | 0.26 | 2.11  | 0.91 | 0.86 | 2.09  |
| 2.2  | SNX6      | 88703041  | sorting nexin 6 isoform b                                                     | Whole cell | 1 | 1.18 | 0.61 | 2.09  | 1.26 | 0.52 | 2.09  |
| 2.19 | DNAJC10   | 24308127  | Dnaj (Hsp40) homolog, subfamily C, member 10                                  | Whole cell | 1 | 1.03 | 0.94 | 2.09  | 0.70 | 0.53 | 2.09  |
| 2.19 | NUP214    | 33946327  | nucleoporin 214kDa                                                            | Whole cell | 1 | 0.99 | 1.00 | 2.09  | 1.16 | 0.69 | 2.49  |
| 2.19 | AP2B1     | 71773106  | adaptor-related protein complex 2, beta 1 subunit isoform a                   | Whole cell | 1 | 1.07 | 0.80 | 10.19 | 1.28 | 0.61 | 2.31  |
| 2.19 | YLP1      | 89037727  | PREDICTED: similar to YLP motif-containing protein 1                          | Whole cell | 1 | 7.52 | 0.16 | 4.83  | 5.30 | 0.21 | 5.06  |
| 2.19 | SMC2      | 110347425 | structural maintenance of chromosomes 2-like 1                                | Whole cell | 1 | 0.97 | 0.97 | 2.09  | 1.12 | 0.81 | 2.09  |
| 2.18 | HELLS     | 21914927  | helicase, lymphoid-specific                                                   | Whole cell | 1 | 0.13 | 0.12 | 2.09  | 0.56 | 0.39 | 2.11  |
| 2.18 | DNMT3A    | 28559069  | DNA cytosine methyltransferase 3 alpha isoform a                              | Whole cell | 1 | 0.78 | 0.65 | 2.09  | 0.83 | 0.73 | 2.09  |
| 2.18 | NOMO2     | 51944971  | nodal modulator 2 isoform 1                                                   | Whole cell | 1 | 0.62 | 0.44 | 2.09  | 0.77 | 0.62 | 2.09  |
| 2.18 | ENAH      | 56549694  | enabled homolog isoform a                                                     | Whole cell | 1 | 0.06 | 0.27 | 5.92  | 0.18 | 0.29 | 3.10  |
| 2.18 | FBX1      | 56682959  | ferritin, heavy polypeptide 1                                                 | Whole cell | 1 | 3.70 | 0.18 | 2.11  | 4.06 | 0.17 | 2.09  |
| 2.17 | PP1L1     | 7706339   | peptidylprolyl isomerase-like 1                                               | Whole cell | 1 | 0.85 | 0.75 | 2.09  | 0.85 | 0.75 | 2.09  |
| 2.17 | C14orf156 | 13654278  | SRA stem-loop-interacting RNA-binding protein                                 | Whole cell | 1 | 1.38 | 0.55 | 2.09  | 1.29 | 0.62 | 2.09  |
| 2.17 | CHERP     | 119226260 | calcium homeostasis endoplasmic reticulum protein                             | Whole cell | 1 | 0.51 | 0.26 | 10.57 | 0.26 | 0.09 | 5.86  |
| 2.16 | ACOT9     | 81295407  | acyl-Coenzyme A thioesterase 2, mitochondrial isoform a                       | Whole cell | 1 | 1.14 | 0.66 | 2.09  | 0.95 | 0.67 | 4.49  |
| 2.16 | FUBP3     | 113421227 | PREDICTED: similar to Far upstream element-binding protein 3                  | Whole cell | 2 | 0.83 | 0.73 | 20.14 | 0.93 | 0.89 | 19.23 |
| 2.15 | UBA2      | 4885649   | SUMO-1 activating enzyme subunit 2                                            | Whole cell | 1 | 2.88 | 0.22 | 2.09  | 2.21 | 0.29 | 2.09  |
| 2.15 | ATP6V1B2  | 19913428  | vacuolar H+-ATPase B2                                                         | Whole cell | 1 | 1.56 | 0.46 | 2.11  | 1.11 | 0.83 | 2.09  |
| 2.15 | PSMD7     | 25777615  | proteasome 26S non-ATPase subunit 7                                           | Whole cell | 1 | 1.01 | 0.97 | 1.46  | 1.06 | 0.88 | 1.38  |
| 2.15 | ZFR       | 34101286  | zinc finger RNA binding protein                                               | Whole cell | 1 | 0.50 | 0.33 | 2.09  | 0.39 | 0.26 | 2.09  |
| 2.15 | DARS2     | 40789249  | aspartyl-tRNA synthetase 2 (mitochondrial)                                    | Whole cell | 1 | 0.38 | 0.22 | 3.56  | 0.38 | 0.22 | 3.63  |
| 2.14 | ARPC4     | 5031595   | actin related protein 2/3 complex subunit 4 isoform a                         | Whole cell | 1 | 0.42 | 0.27 | 2.09  | 0.42 | 0.27 | 2.09  |
| 2.14 | GTF3C4    | 6912400   | general transcription factor IIIC, polypeptide 4, 90kDa                       | Whole cell | 1 | 1.77 | 0.38 | 2.09  | 2.36 | 0.27 | 2.09  |
| 2.14 | EPB41     | 42716289  | erythrocyte membrane protein band 4.1 (elliptocytosis 1, RH-linked) isoform 1 | Whole cell | 1 | 1.66 | 0.42 | 2.11  | 1.72 | 0.39 | 2.09  |
| 2.14 | MLL2      | 126032311 | myeloid/lymphoid or mixed-lineage leukemia 2                                  | Whole cell | 1 | 0.61 | 0.29 | 2.11  | 0.57 | 0.24 | 2.19  |
| 2.13 | ATP1B3    | 4502281   | Na <sup>+</sup> /K <sup>+</sup> -ATPase beta 3 subunit                        | Whole cell | 1 | 0.29 | 0.19 | 2.09  | 0.25 | 0.18 | 2.73  |
| 2.13 | SEC63     | 6005872   | SEC63-like protein                                                            | Whole cell | 1 | 1.33 | 0.61 | 2.40  | 1.36 | 0.56 | 2.09  |
| 2.13 | GTF3C3    | 6912398   | general transcription factor IIIC, polypeptide 3, 102kDa                      | Whole cell | 1 | 0.36 | 0.23 | 2.09  | 0.47 | 0.31 | 2.11  |
| 2.13 | WBP11     | 7706501   | WW domain binding protein 11                                                  | Whole cell | 1 | 1.01 | 0.57 | 1.26  | 1.05 | 0.62 | 1.16  |
| 2.13 | EXOSC4    | 9506689   | exosome component 4                                                           | Whole cell | 1 | 0.79 | 0.68 | 2.09  | 1.18 | 0.73 | 2.09  |
| 2.13 | FAM162A   | 49355721  | growth and transformation-dependent protein                                   | Whole cell | 1 | 1.80 | 0.37 | 2.09  | 1.57 | 0.45 | 2.09  |
| 2.12 | STAT1     | 6274552   | signal transducer and activator of transcription 1 isoform alpha              | Whole cell | 1 | 1.26 | 0.65 | 2.09  | 1.19 | 0.73 | 2.09  |
| 2.12 | MST4      | 15011880  | serine/threonine protein kinase MST4 isoform 1                                | Whole cell | 1 | 0.74 | 0.59 | 2.11  | 0.54 | 0.37 | 2.09  |
| 2.12 | UBE3A     | 19718766  | ubiquitin protein ligase E3A isoform 2                                        | Whole cell | 1 | 0.56 | 0.38 | 2.09  | 0.51 | 0.34 | 2.09  |
| 2.12 | NCKAP1    | 45545411  | NCK-associated protein 1 isoform 2                                            | Whole cell | 1 | 0.52 | 0.35 | 2.09  | 0.65 | 0.48 | 2.09  |
| 2.12 | TPM2      | 47519616  | tropomyosin 2 (beta) isoform 2                                                | Whole cell | 9 | 1.45 | 0.51 | 2.09  | 1.92 | 0.34 | 2.09  |
| 2.12 | EIF2A     | 54873624  | eukaryotic translation initiation factor 2A                                   | Whole cell | 1 | 0.68 | 0.52 | 2.11  | 0.55 | 0.38 | 2.09  |
| 2.12 | TMEM205   | 63055043  | hypothetical protein LOC374882                                                | Whole cell | 1 | 1.14 | 0.53 | 19.95 | 1.49 | 0.28 | 20.70 |
| 2.12 | C8orf79   | 86604706  | hypothetical protein LOC286032                                                | Whole cell | 1 | 0.56 | 0.19 | 2.11  | 0.76 | 0.43 | 4.97  |
| 2.11 | ARID3A    | 4885193   | AT rich interactive domain 3A (BRIGHT-like) protein                           | Whole cell | 1 | 0.99 | 1.00 | 2.09  | 0.60 | 0.43 | 2.11  |
| 2.11 | PIPH      | 5454154   | peptidylprolyl isomerase H                                                    | Whole cell | 1 | 0.39 | 0.26 | 2.09  | 0.30 | 0.20 | 2.09  |
| 2.11 | CBX5      | 6912292   | chromobox homolog 5 (HP1 alpha homolog, Drosophila)                           | Whole cell | 1 | 0.51 | 0.33 | 2.09  | 0.59 | 0.40 | 2.09  |
| 2.11 | NMT1      | 10835073  | N-myristoyltransferase 1                                                      | Whole cell | 1 | 0.95 | 0.81 | 1.72  | 0.95 | 0.84 | 1.84  |
| 2.11 | TOP2B     | 19913408  | DNA topoisomerase II, beta isozyme                                            | Whole cell | 4 | 4.45 | 0.16 | 2.09  | 3.80 | 0.18 | 2.09  |
| 2.11 | HADHA     | 20127408  | mitochondrial trifunctional protein, alpha subunit                            | Whole cell | 1 | 1.25 | 0.66 | 2.09  | 1.15 | 0.78 | 2.11  |
| 2.11 | PRMT3     | 44771198  | HMT1 hnRNP methyltransferase-like 3                                           | Whole cell | 1 | 0.85 | 0.76 | 2.11  | 0.41 | 0.27 | 2.11  |

|      |           |           |                                                                                       |            |    |       |      |       |       |      |       |
|------|-----------|-----------|---------------------------------------------------------------------------------------|------------|----|-------|------|-------|-------|------|-------|
| 2.11 | PON2      | 66529396  | paraoxonase 2 isoform 2                                                               | Whole cell | 1  | 99.08 | 0.03 | 1.00  | 99.08 | 0.03 | 1.00  |
| 2.11 | SLC7A5    | 71979932  | solute carrier family 7 (cationic amino acid transporter, y+ system), member 5        | Whole cell | 1  | 6.67  | 0.19 | 2.11  | 5.70  | 0.22 | 2.15  |
| 2.11 | LOC653972 | 89038889  | PREDICTED: similar to chromobox homolog 3                                             | Whole cell | 1  | 1.87  | 0.99 | 1.94  | 1.92  | 0.83 | 1.94  |
| 2.1  | VBP1      | 4507873   | von Hippel-Lindau binding protein 1                                                   | Whole cell | 1  | 0.59  | 0.41 | 2.11  | 0.77  | 0.64 | 3.73  |
| 2.1  | LMAN2     | 5803023   | lectin, mannose-binding 2                                                             | Whole cell | 1  | 1.37  | 0.56 | 2.11  | 1.17  | 0.74 | 2.09  |
| 2.1  | WDR3      | 5803221   | WD repeat-containing protein 3                                                        | Whole cell | 1  | 18.37 | 0.04 | 34.67 | 17.22 | 0.04 | 34.67 |
| 2.1  | DDX19A    | 8922886   | DDX19-like protein                                                                    | Whole cell | 1  | 1.46  | 0.51 | 2.09  | 1.57  | 0.49 | 5.20  |
| 2.1  | H2AFY2    | 8923920   | core histone macroH2A2.2                                                              | Whole cell | 2  | 0.29  | 0.20 | 2.09  | 0.51  | 0.34 | 2.11  |
| 2.1  | GLS       | 21361452  | glutaminase C                                                                         | Whole cell | 1  | 1.74  | 0.39 | 2.11  | 1.39  | 0.55 | 2.11  |
| 2.1  | LEFTY2    | 27436881  | endometrial bleeding associated factor preproprotein                                  | Whole cell | 1  | 2.40  | 0.24 | 2.11  | 1.63  | 0.43 | 7.24  |
| 2.1  | PDXDC1    | 39930345  | hypothetical protein LOC23042                                                         | Whole cell | 1  | 1.26  | 0.65 | 2.09  | 1.43  | 0.52 | 2.09  |
| 2.1  | LOC653994 | 89026106  | PREDICTED: similar to eukaryotic translation initiation factor 4H isoform 2 isoform 6 | Whole cell | 1  | 0.87  | 0.81 | 2.09  | 0.96  | 0.89 | 2.09  |
| 2.09 | ALDH7A1   | 4557343   | antiquitin                                                                            | Whole cell | 1  | 0.73  | 0.58 | 2.09  | 0.74  | 0.60 | 2.09  |
| 2.09 | C21orf70  | 17158023  | hypothetical protein LOC85395                                                         | Whole cell | 1  | 1.31  | 0.60 | 2.09  | 1.72  | 0.39 | 2.09  |
| 2.09 | CTNBL1    | 18644734  | beta catenin-like 1                                                                   | Whole cell | 1  | 0.27  | 0.18 | 2.09  | 0.28  | 0.19 | 2.09  |
| 2.09 | PUS7      | 50727002  | pseudouridylyl synthase 7 homolog                                                     | Whole cell | 1  | 0.50  | 0.27 | 2.58  | 0.77  | 0.58 | 2.09  |
| 2.09 | SMU1      | 109948304 | smu-1 suppressor of mec-8 and unc-52 homolog                                          | Whole cell | 1  | 0.53  | 0.36 | 2.09  | 0.29  | 0.20 | 2.11  |
| 2.08 | MPZL1     | 4506357   | myelin protein zero-like 1 isoform a                                                  | Whole cell | 1  | 0.63  | 0.43 | 22.49 | 1.00  | 0.97 | 18.88 |
| 2.08 | ADRM1     | 28373194  | adhesion regulating molecule 1                                                        | Whole cell | 1  | 1.05  | 0.91 | 2.09  | 1.33  | 0.59 | 2.09  |
| 2.08 | COPS6     | 34147637  | COP9 signalosome subunit 6                                                            | Whole cell | 1  | 1.25  | 0.67 | 2.11  | 1.92  | 0.34 | 2.09  |
| 2.08 | SF1       | 42544123  | splicing factor 1 isoform 3                                                           | Whole cell | 2  | 0.99  | 1.00 | 2.09  | 1.03  | 0.94 | 2.09  |
| 2.08 | PRKCI     | 48255885  | protein kinase C, iota                                                                | Whole cell | 1  | 1.19  | 0.72 | 2.09  | 1.33  | 0.59 | 2.09  |
| 2.08 | CCBL2     | 56713254  | kynurenine aminotransferase III isoform 1                                             | Whole cell | 1  | 0.86  | 0.78 | 2.09  | 0.77  | 0.62 | 2.09  |
| 2.08 | PLAA      | 72534670  | phospholipase A2-activating protein isoform 1                                         | Whole cell | 1  | 1.96  | 0.33 | 2.11  | 2.03  | 0.32 | 2.11  |
| 2.08 | PMPCB     | 94538354  | mitochondrial processing peptidase beta subunit                                       | Whole cell | 1  | 1.11  | 0.82 | 2.09  | 1.27  | 0.64 | 2.11  |
| 2.07 | FABP5     | 4557581   | fatty acid binding protein 5 (psoriasis-associated)                                   | Whole cell | 1  | 5.40  | 0.14 | 2.11  | 5.70  | 0.14 | 2.11  |
| 2.07 | FLOT1     | 5031699   | flotillin 1                                                                           | Whole cell | 1  | 1.71  | 0.40 | 2.09  | 1.91  | 0.34 | 2.09  |
| 2.07 | SUGT1     | 5730041   | suppressor of G2 allele of SKP1                                                       | Whole cell | 1  | 1.09  | 0.70 | 2.15  | 0.81  | 0.68 | 2.09  |
| 2.07 | RBPM5     | 5803141   | RNA-binding protein with multiple splicing isoform A                                  | Whole cell | 1  | 2.91  | 0.22 | 2.09  | 0.79  | 0.67 | 2.11  |
| 2.07 | AHSA1     | 6912280   | AHA1, activator of heat shock 90kDa protein ATPase homolog 1                          | Whole cell | 1  | 0.90  | 0.86 | 2.09  | 1.03  | 0.94 | 2.09  |
| 2.07 | ABCF2     | 10947137  | ATP-binding cassette, sub-family F, member 2 isoform b                                | Whole cell | 1  | 1.10  | 0.69 | 2.42  | 1.07  | 0.82 | 3.40  |
| 2.07 | HIST1H2BO | 16306566  | histone H2B                                                                           | Whole cell | 21 | 0.20  | 0.34 | 3.28  | 0.19  | 0.40 | 3.37  |
| 2.07 | HIBADH    | 23308751  | 3-hydroxyisobutyrate dehydrogenase                                                    | Whole cell | 1  | 1.00  | 0.64 | 6.03  | 0.96  | 0.57 | 5.65  |
| 2.07 | SEPHS1    | 24797148  | selenophosphate synthetase                                                            | Whole cell | 1  | 2.15  | 0.24 | 2.09  | 2.33  | 0.23 | 2.11  |
| 2.07 | DGKH      | 29788751  | diacylglycerol kinase, eta isoform 2                                                  | Whole cell | 1  | 0.71  | 0.55 | 2.09  | 0.29  | 0.20 | 2.11  |
| 2.07 | LPCAT1    | 33946291  | acyltransferase like 2                                                                | Whole cell | 1  | 1.02  | 0.95 | 2.09  | 0.58  | 0.40 | 2.09  |
| 2.07 | NUP37     | 34222121  | nucleoporin 37kDa                                                                     | Whole cell | 1  | 1.20  | 0.38 | 7.18  | 1.60  | 0.29 | 2.09  |
| 2.07 | UCRC      | 41281885  | ubiquinol-cytochrome c reductase complex 7.2kDa protein isoform a                     | Whole cell | 1  | 1.14  | 0.79 | 2.11  | 1.42  | 0.53 | 2.09  |
| 2.07 | GSR       | 50301238  | glutathione reductase                                                                 | Whole cell | 1  | 0.82  | 0.72 | 2.09  | 0.79  | 0.67 | 2.11  |
| 2.07 | SRP72     | 109638749 | signal recognition particle 72kDa                                                     | Whole cell | 1  | 2.61  | 0.25 | 2.11  | 1.74  | 0.39 | 6.19  |
| 2.06 | GSN       | 4504165   | gelsolin isoform a                                                                    | Whole cell | 1  | 1.13  | 0.98 | 2.94  | 1.14  | 0.96 | 2.96  |
| 2.06 | PDCD6     | 7019485   | programmed cell death 6                                                               | Whole cell | 1  | 0.56  | 0.37 | 2.09  | 0.77  | 0.60 | 4.92  |
| 2.06 | CORO1C    | 7656991   | coronin, actin binding protein, 1C                                                    | Whole cell | 1  | 0.53  | 0.36 | 2.11  | 0.37  | 0.24 | 2.09  |
| 2.06 | NOC2L     | 7661606   | nucleolar complex associated 2 homolog                                                | Whole cell | 1  | 0.52  | 0.35 | 2.09  | 0.45  | 0.30 | 2.11  |
| 2.06 | GLT2SD1   | 31377697  | glycosyltransferase 25 domain containing 1                                            | Whole cell | 1  | 1.51  | 0.48 | 2.09  | 1.57  | 0.45 | 2.09  |
| 2.06 | TSR1      | 39780588  | TSR1, 20S rRNA accumulation                                                           | Whole cell | 1  | 0.36  | 0.24 | 2.11  | 0.35  | 0.23 | 2.09  |
| 2.06 | NUP160    | 54859722  | nucleoporin 160kDa                                                                    | Whole cell | 1  | 0.68  | 0.51 | 2.09  | 0.81  | 0.69 | 2.09  |
| 2.06 | LOC651453 | 89030524  | PREDICTED: similar to ribosomal protein L36                                           | Whole cell | 2  | 1.09  | 0.85 | 2.09  | 1.21  | 0.69 | 2.09  |
| 2.05 | USO1      | 4505541   | vesicle docking protein p115                                                          | Whole cell | 1  | 0.77  | 0.63 | 2.09  | 0.70  | 0.54 | 2.09  |
| 2.05 | ACP1      | 4757714   | acid phosphatase 1 isoform c                                                          | Whole cell | 1  | 0.24  | 0.27 | 2.05  | 0.15  | 0.24 | 2.58  |
| 2.05 | CNN2      | 4758018   | calponin 2 isoform a                                                                  | Whole cell | 1  | 1.36  | 0.57 | 2.09  | 1.34  | 0.58 | 2.09  |
| 2.05 | PEX14     | 4758896   | peroxisomal biogenesis factor 14                                                      | Whole cell | 1  | 1.06  | 0.90 | 2.09  | 0.95  | 0.92 | 2.09  |
| 2.05 | NUDT16L1  | 14150147  | syndesmos                                                                             | Whole cell | 1  | 1.03  | 0.92 | 1.51  | 0.97  | 0.97 | 1.38  |
| 2.05 | RECQL     | 14591904  | RecQ protein-like isoform 1                                                           | Whole cell | 1  | 0.74  | 0.59 | 2.09  | 0.78  | 0.65 | 2.09  |
| 2.05 | SFRS13A   | 16905517  | FUS interacting protein (serine-arginine rich) 1 isoform 2                            | Whole cell | 2  | 1.08  | 0.86 | 1.74  | 1.08  | 0.64 | 2.03  |
| 2.05 | IFITM1    | 40254450  | interferon induced transmembrane protein 1 (9-27)                                     | Whole cell | 1  | 2.68  | 0.24 | 2.09  | 2.78  | 0.23 | 2.09  |
| 2.05 | UQCRC1    | 46593007  | ubiquinol-cytochrome c reductase core protein I                                       | Whole cell | 1  | 1.33  | 0.58 | 1.38  | 1.37  | 0.56 | 1.38  |
| 2.05 | HADH      | 94557308  | L-3-hydroxyacyl-Coenzyme A dehydrogenase                                              | Whole cell | 1  | 1.57  | 0.45 | 2.11  | 1.53  | 0.47 | 2.09  |
| 2.04 | CUL3      | 4503165   | cullin 3                                                                              | Whole cell | 1  | 0.22  | 0.16 | 2.11  | 0.22  | 0.16 | 2.11  |
| 2.04 | SFRS11    | 4759100   | splicing factor, arginine/serine-rich 11                                              | Whole cell | 1  | 0.19  | 0.15 | 2.09  | 0.17  | 0.14 | 2.09  |
| 2.04 | UBE2K     | 4885417   | ubiquitin interacting protein 2                                                       | Whole cell | 1  | 1.37  | 0.56 | 2.09  | 0.95  | 0.94 | 2.09  |



|      |           |           |                                                                              |            |    |      |      |       |      |      |      |
|------|-----------|-----------|------------------------------------------------------------------------------|------------|----|------|------|-------|------|------|------|
| 2.04 | RUVBL2    | 5730023   | RuvB-like 2                                                                  | Whole cell | 1  | 1.26 | 0.66 | 2.11  | 1.26 | 0.65 | 2.09 |
| 2.04 | WDHD1     | 5901892   | WD repeat and HMG-box DNA binding protein 1 isoform 1                        | Whole cell | 1  | 0.70 | 0.54 | 2.09  | 0.86 | 0.79 | 2.09 |
| 2.04 | ERLIN2    | 6005721   | SPFH domain family, member 2 isoform 1                                       | Whole cell | 1  | 1.19 | 0.73 | 2.09  | 1.36 | 0.57 | 2.09 |
| 2.04 | AP3M1     | 6912240   | adaptor-related protein complex 3, mu 1 subunit                              | Whole cell | 1  | 2.83 | 0.23 | 2.11  | 2.83 | 0.23 | 2.25 |
| 2.04 | UFC1      | 7705481   | Ufm1-conjugating enzyme 1                                                    | Whole cell | 1  | 0.72 | 0.56 | 2.09  | 0.69 | 0.52 | 2.09 |
| 2.04 | DIABLO    | 9845297   | diablo isoform 1                                                             | Whole cell | 1  | 0.84 | 0.50 | 5.20  | 1.12 | 0.86 | 2.09 |
| 2.04 | DHX30     | 20336294  | DEAH (Asp-Glu-Ala-His) box polypeptide 30 isoform 1                          | Whole cell | 1  | 0.77 | 0.64 | 2.09  | 1.18 | 0.73 | 2.09 |
| 2.04 | ATP5F1    | 21361565  | ATP synthase, H+ transporting, mitochondrial F0 complex, subunit B1          | Whole cell | 0  | 0.35 | 0.23 | 2.09  | 0.35 | 0.23 | 2.09 |
| 2.04 | ADD1      | 29826321  | adducin 1 (alpha) isoform b                                                  | Whole cell | 1  | 2.96 | 0.22 | 2.11  | 4.17 | 0.17 | 2.11 |
| 2.04 | RTN3      | 41393608  | reticulon 3 isoform b                                                        | Whole cell | 1  | 1.11 | 0.83 | 2.09  | 1.03 | 0.93 | 2.09 |
| 2.04 | UROD      | 71051616  | uroporphyrinogen decarboxylase                                               | Whole cell | 1  | 1.79 | 0.37 | 2.09  | 1.96 | 0.33 | 2.09 |
| 2.04 | LOC645619 | 89035461  | PREDICTED: similar to Adenylate kinase isoenzyme 4, mitochondrial            | Whole cell | 1  | 1.10 | 0.83 | 2.09  | 1.13 | 0.79 | 2.09 |
| 2.03 | PRKRA     | 4505581   | protein kinase, interferon-inducible double stranded RNA dependent activator | Whole cell | 1  | 1.41 | 0.53 | 2.09  | 0.98 | 0.98 | 2.09 |
| 2.03 | RPA3      | 4506587   | replication protein A3, 14kDa                                                | Whole cell | 1  | 1.56 | 0.45 | 2.09  | 1.72 | 0.39 | 2.09 |
| 2.03 | SF3A3     | 5803167   | splicing factor 3a, subunit 3                                                | Whole cell | 1  | 0.35 | 0.22 | 2.11  | 0.43 | 0.27 | 2.29 |
| 2.03 | LSM3      | 7657315   | Lsm3 protein                                                                 | Whole cell | 1  | 0.98 | 0.95 | 2.09  | 0.65 | 0.44 | 2.09 |
| 2.03 | NAT5      | 7705823   | N-acetyltransferase 5 isoform a                                              | Whole cell | 1  | 0.95 | 0.93 | 2.11  | 1.03 | 0.95 | 2.09 |
| 2.03 | TMEM109   | 13129092  | transmembrane protein 109                                                    | Whole cell | 1  | 0.43 | 0.27 | 2.44  | 0.48 | 0.28 | 2.11 |
| 2.03 | HNRPLL    | 20149709  | heterogeneous nuclear ribonucleoprotein L-like                               | Whole cell | 1  | 0.98 | 0.98 | 2.09  | 1.16 | 0.76 | 2.11 |
| 2.03 | IPO9      | 21361659  | importin 9                                                                   | Whole cell | 1  | 1.36 | 0.57 | 2.09  | 1.46 | 0.51 | 2.09 |
| 2.03 | SPG20     | 21703346  | spartin                                                                      | Whole cell | 1  | 2.27 | 0.34 | 25.82 | 3.80 | 0.19 | 7.80 |
| 2.03 | UBA3      | 38045942  | ubiquitin-activating enzyme E1C isoform 1                                    | Whole cell | 1  | 0.59 | 0.41 | 2.09  | 0.17 | 0.14 | 2.11 |
| 2.03 | LOC653888 | 89026256  | PREDICTED: similar to Actin-related protein 2/3 complex subunit 1B           | Whole cell | 1  | 0.83 | 0.74 | 2.09  | 0.74 | 0.60 | 2.09 |
| 2.03 | APOA1BP   | 91984773  | apolipoprotein A-I binding protein                                           | Whole cell | 1  | 1.19 | 0.66 | 2.09  | 1.01 | 1.00 | 2.09 |
| 2.03 | STK39     | 115430252 | serine threonine kinase 39 (STE20/SPS1 homolog, yeast)                       | Whole cell | 2  | 0.65 | 0.48 | 2.11  | 0.72 | 0.56 | 2.11 |
| 2.02 | CBR1      | 4502599   | carbonyl reductase 1                                                         | Whole cell | 1  | 1.13 | 0.79 | 2.09  | 2.25 | 0.28 | 2.09 |
| 2.02 | ENSA      | 4758272   | endosulfine alpha isoform 3                                                  | Whole cell | 1  | 1.28 | 0.63 | 2.09  | 1.21 | 0.70 | 2.09 |
| 2.02 | PROSC     | 6005842   | proline synthetase co-transcribed homolog                                    | Whole cell | 1  | 0.89 | 0.83 | 2.09  | 0.65 | 0.48 | 2.09 |
| 2.02 | NOP58     | 7706254   | nucleolar protein NOP5/NOP58                                                 | Whole cell | 1  | 0.96 | 0.96 | 2.09  | 0.97 | 0.97 | 2.09 |
| 2.02 | GOPC      | 9966877   | golgi associated PDZ and coiled-coil motif containing isoform a              | Whole cell | 1  | 1.34 | 0.58 | 2.09  | 2.21 | 0.29 | 2.11 |
| 2.02 | SH3BGL3   | 13775198  | SH3 domain binding glutamic acid-rich protein like 3                         | Whole cell | 1  | 1.08 | 0.93 | 2.09  | 0.89 | 0.76 | 2.09 |
| 2.02 | WHSC2     | 19913363  | Wolf-Hirschhorn syndrome candidate 2 protein                                 | Whole cell | 1  | 0.36 | 0.24 | 2.09  | 0.15 | 0.13 | 2.11 |
| 2.02 | SMARCE1   | 21264355  | SWI/SNF-related matrix-associated actin-dependent regulator of chromatin e1  | Whole cell | 1  | 0.86 | 0.77 | 2.09  | 0.93 | 0.90 | 2.09 |
| 2.02 | AHCYL1    | 21361647  | S-adenosylhomocysteine hydrolase-like 1                                      | Whole cell | 2  | 1.22 | 0.68 | 13.06 | 1.54 | 0.47 | 2.11 |
| 2.02 | MACF1     | 33188443  | microfilament and actin filament cross-linker protein isoform b              | Whole cell | 0  | 7.18 | 0.12 | 2.09  | 5.40 | 0.14 | 2.11 |
| 2.02 | GPS1      | 47078240  | G protein pathway suppressor 1 isoform 2                                     | Whole cell | 1  | 0.60 | 0.42 | 2.09  | 0.66 | 0.49 | 2.11 |
| 2.02 | SUMO1     | 54792065  | SMT3 suppressor of mif two 3 homolog 1 isoform a                             | Whole cell | 1  | 0.69 | 0.52 | 2.09  | 0.63 | 0.45 | 2.09 |
| 2.01 | EIF3D     | 4503523   | eukaryotic translation initiation factor 3 subunit 7                         | Whole cell | 1  | 1.08 | 0.72 | 16.75 | 1.18 | 0.74 | 3.05 |
| 2.01 | M6PR      | 4505061   | cation-dependent mannose-6-phosphate receptor                                | Whole cell | 1  | 0.97 | 0.57 | 10.38 | 0.97 | 0.77 | 2.33 |
| 2.01 | FADD      | 4505229   | Fas-associated via death domain                                              | Whole cell | 1  | 1.20 | 0.70 | 2.09  | 1.08 | 0.87 | 2.09 |
| 2.01 | SYNGR2    | 4759202   | synaptogyrin 2                                                               | Whole cell | 1  | 1.22 | 0.69 | 2.09  | 1.17 | 0.74 | 2.09 |
| 2.01 | TXNL1     | 4759274   | thioredoxin-like 1                                                           | Whole cell | 1  | 4.37 | 0.16 | 2.11  | 5.06 | 0.15 | 2.09 |
| 2.01 | CRKL      | 4885153   | v-crk sarcoma virus CT10 oncogene homolog (avian)-like                       | Whole cell | 1  | 0.54 | 0.37 | 4.21  | 0.58 | 0.41 | 2.99 |
| 2.01 | AKR1A1    | 5174391   | aldo-keto reductase family 1, member A1                                      | Whole cell | 1  | 1.96 | 0.33 | 2.09  | 2.05 | 0.32 | 2.11 |
| 2.01 | CDC37     | 5901922   | cell division cycle 37 protein                                               | Whole cell | 1  | 2.51 | 0.26 | 4.29  | 2.36 | 0.25 | 2.11 |
| 2.01 | RBM17     | 14249678  | RNA binding motif protein 17                                                 | Whole cell | 1  | 1.53 | 0.33 | 2.38  | 2.05 | 0.22 | 3.25 |
| 2.01 | TUBA1C    | 14389309  | tubulin alpha 6                                                              | Whole cell | 66 | 0.11 | 0.25 | 2.96  | 0.17 | 0.25 | 2.58 |
| 2.01 | SEC23B    | 14591928  | Sec23 homolog B                                                              | Whole cell | 2  | 1.79 | 0.37 | 2.09  | 1.34 | 0.58 | 2.09 |
| 2.01 | SEC13     | 34335134  | SEC13 protein                                                                | Whole cell | 1  | 2.19 | 0.29 | 2.11  | 2.11 | 0.30 | 2.11 |
| 2.01 | C7orf20   | 38570062  | hypothetical protein LOC51608                                                | Whole cell | 1  | 1.47 | 0.49 | 2.09  | 2.11 | 0.30 | 2.09 |
| 2.01 | GLRX5     | 42516576  | glutaredoxin 5                                                               | Whole cell | 1  | 1.04 | 0.93 | 2.09  | 1.26 | 0.67 | 2.21 |
| 2.01 | MAP1S     | 50428935  | BPY2 interacting protein 1                                                   | Whole cell | 1  | 3.53 | 0.19 | 2.11  | 3.98 | 0.17 | 2.09 |
| 2.01 | DCI       | 62530384  | dodecenoyl-Coenzyme A delta isomerase                                        | Whole cell | 1  | 0.88 | 0.87 | 2.40  | 0.90 | 0.72 | 6.67 |
| 2.01 | P4HA1     | 63252886  | prolyl 4-hydroxylase, alpha 1 subunit isoform 1                              | Whole cell | 1  | 0.26 | 0.18 | 2.09  | 0.44 | 0.29 | 2.09 |
| 2.01 | CORO1B    | 65787364  | coronin, actin binding protein, 1B                                           | Whole cell | 1  | 0.80 | 0.68 | 2.09  | 0.75 | 0.61 | 2.09 |
| 2.01 | C20orf27  | 85362737  | hypothetical protein LOC54976                                                | Whole cell | 1  | 1.03 | 0.95 | 2.09  | 1.09 | 0.85 | 2.09 |
| 2.01 | LOC727761 | 113413597 | PREDICTED: similar to deoxythymidylate kinase (thymidylate kinase) isoform 3 | Whole cell | 1  | 1.51 | 0.47 | 2.09  | 1.41 | 0.53 | 2.09 |
| 2    | ACY1      | 4501901   | aminoacylase 1                                                               | Whole cell | 1  | 2.51 | 0.25 | 2.09  | 1.72 | 0.39 | 2.09 |
| 2    | BLVRB     | 4502419   | biliverdin reductase B (flavin reductase (NADPH))                            | Whole cell | 1  | 0.59 | 0.41 | 2.09  | 0.94 | 0.91 | 2.09 |
| 2    | RDX       | 4506467   | radixin                                                                      | Whole cell | 7  | 1.41 | 0.54 | 2.11  | 0.99 | 0.99 | 2.09 |
| 2    | EMD       | 4557553   | emerin                                                                       | Whole cell | 1  | 0.75 | 0.57 | 1.38  | 0.75 | 0.71 | 1.42 |

|      |           |           |                                                                               |            |    |       |      |       |       |      |       |
|------|-----------|-----------|-------------------------------------------------------------------------------|------------|----|-------|------|-------|-------|------|-------|
| 2    | NME1      | 4557797   | non-metastatic cells 1, protein (NM23A) expressed in isoform b                | Whole cell | 20 | 1.45  | 0.46 | 3.66  | 1.87  | 0.35 | 2.11  |
| 2    | GMFB      | 4758442   | glia maturation factor, beta                                                  | Whole cell | 1  | 2.44  | 0.26 | 2.11  | 2.61  | 0.25 | 2.09  |
| 2    | NDUFB10   | 4758774   | NADH dehydrogenase (ubiquinone) 1 beta subcomplex, 10, 22kDa                  | Whole cell | 1  | 0.55  | 0.38 | 2.11  | 0.38  | 0.25 | 2.09  |
| 2    | POLR1C    | 4759046   | RNA polymerase I subunit isoform 2                                            | Whole cell | 1  | 1.46  | 0.56 | 4.61  | 1.22  | 0.79 | 6.49  |
| 2    | VAPB      | 4759302   | VAMP-associated protein B/C                                                   | Whole cell | 2  | 0.82  | 0.72 | 2.09  | 0.72  | 0.57 | 2.09  |
| 2    | ARPC3     | 5031597   | actin related protein 2/3 complex subunit 3                                   | Whole cell | 1  | 0.78  | 0.67 | 1.38  | 0.89  | 0.78 | 1.45  |
| 2    | CAPZA2    | 5453599   | capping protein (actin filament) muscle Z-line, alpha 2                       | Whole cell | 2  | 1.03  | 0.62 | 10.09 | 0.90  | 0.90 | 8.55  |
| 2    | SSR4      | 5454090   | signal sequence receptor, delta                                               | Whole cell | 1  | 2.49  | 0.26 | 2.11  | 2.11  | 0.31 | 2.11  |
| 2    | COPS8     | 5729779   | COP9 signalosome subunit 8 isoform 1                                          | Whole cell | 1  | 2.29  | 0.29 | 2.54  | 2.44  | 0.27 | 2.09  |
| 2    | SCAMP2    | 5730031   | secretory carrier membrane protein 2                                          | Whole cell | 1  | 1.22  | 0.69 | 2.09  | 0.95  | 0.94 | 2.09  |
| 2    | GOLT1B    | 7705636   | golgi transport 1 homolog B                                                   | Whole cell | 1  | 0.54  | 0.37 | 2.09  | 0.53  | 0.36 | 2.11  |
| 2    | NSDHL     | 8393516   | NAD(P) dependent steroid dehydrogenase-like                                   | Whole cell | 1  | 2.13  | 0.30 | 2.09  | 1.29  | 0.62 | 2.09  |
| 2    | ENY2      | 9910186   | enhancer of yellow 2 homolog                                                  | Whole cell | 1  | 1.75  | 0.44 | 1.82  | 1.94  | 0.36 | 1.39  |
| 2    | EIF3K     | 10801345  | eukaryotic translation initiation factor 3, subunit 12                        | Whole cell | 1  | 0.42  | 0.27 | 2.09  | 0.51  | 0.34 | 2.11  |
| 2    | LSM2      | 10863977  | LSM2 homolog, U6 small nuclear RNA associated                                 | Whole cell | 2  | 1.21  | 0.61 | 2.44  | 1.38  | 0.53 | 2.11  |
| 2    | SF3B5     | 13775200  | SF3b10                                                                        | Whole cell | 1  | 1.05  | 0.87 | 1.47  | 1.03  | 0.85 | 1.58  |
| 2    | GPN1      | 14149629  | XPA binding protein 1                                                         | Whole cell | 1  | 2.11  | 0.30 | 2.09  | 1.87  | 0.35 | 2.11  |
| 2    | C1orf57   | 14150100  | hypothetical protein LOC84284                                                 | Whole cell | 1  | 0.82  | 0.72 | 2.09  | 1.15  | 0.77 | 2.09  |
| 2    | SNRPE1    | 14741936  | PREDICTED: similar to small nuclear ribonucleoprotein E                       | Whole cell | 2  | 0.18  | 0.15 | 2.09  | 0.18  | 0.14 | 2.11  |
| 2    | PTPN12    | 18375652  | protein tyrosine phosphatase, non-receptor type 12                            | Whole cell | 1  | 1.84  | 0.36 | 2.11  | 2.21  | 0.29 | 2.09  |
| 2    | CSNK2B    | 23503295  | casein kinase 2, beta polypeptide                                             | Whole cell | 1  | 1.36  | 0.57 | 2.09  | 1.18  | 0.73 | 2.09  |
| 2    | FXN       | 31742516  | frataxin isoform 2 preproprotein                                              | Whole cell | 1  | 1.07  | 0.88 | 2.09  | 1.37  | 0.56 | 2.09  |
| 2    | BCAP31    | 32171186  | B-cell receptor-associated protein 31                                         | Whole cell | 1  | 0.34  | 0.22 | 2.11  | 0.54  | 0.36 | 2.11  |
| 2    | UBE2C     | 32967285  | ubiquitin-conjugating enzyme E2C isoform 3                                    | Whole cell | 1  | 1.64  | 0.42 | 2.11  | 1.43  | 0.52 | 2.11  |
| 2    | TP53I11   | 33695117  | p53-induced protein                                                           | Whole cell | 1  | 2.03  | 0.32 | 2.09  | 1.49  | 0.49 | 2.11  |
| 2    | FLYWCH2   | 34147540  | hypothetical protein LOC114984                                                | Whole cell | 1  | 1.39  | 0.54 | 2.09  | 1.36  | 0.57 | 2.09  |
| 2    | AGFG1     | 38570132  | HIV-1 Rev binding protein                                                     | Whole cell | 1  | 1.31  | 0.61 | 2.09  | 0.90  | 0.85 | 2.09  |
| 2    | ID1       | 40018633  | isopentenyl-diphosphate delta isomerase                                       | Whole cell | 1  | 1.18  | 0.74 | 2.11  | 1.56  | 0.46 | 2.11  |
| 2    | RPE       | 40385883  | ribulose-5-phosphate-3-epimerase isoform 1                                    | Whole cell | 1  | 2.00  | 0.32 | 2.09  | 1.43  | 0.52 | 2.09  |
| 2    | STRN      | 51242945  | striatin, calmodulin binding protein                                          | Whole cell | 1  | 1.57  | 0.53 | 2.21  | 1.94  | 0.47 | 1.66  |
| 2    | ATP5J     | 51479143  | ATP synthase, H+ transporting, mitochondrial F0 complex, subunit F6 isoform a | Whole cell | 1  | 2.09  | 0.29 | 2.19  | 1.53  | 0.45 | 2.51  |
| 2    | CYB5B     | 83921614  | cytochrome b5 outer mitochondrial membrane                                    | Whole cell | 1  | 1.56  | 0.49 | 4.06  | 1.54  | 0.46 | 2.09  |
| 2    | CD151     | 87159824  | CD151 antigen                                                                 | Whole cell | 1  | 1.06  | 0.90 | 1.41  | 1.17  | 0.66 | 1.18  |
| 2    | LOC644755 | 89028687  | PREDICTED: hypothetical protein                                               | Whole cell | 1  | 4.66  | 0.16 | 2.11  | 4.66  | 0.16 | 2.11  |
| 2    | NGDN      | 111038133 | neuroguidin isoform 2                                                         | Whole cell | 1  | 1.11  | 0.82 | 10.76 | 2.07  | 0.31 | 2.11  |
| 1.99 | TBCE      | 4507375   | beta-tubulin cofactor E                                                       | Whole cell | 1  | 0.93  | 0.66 | 11.38 | 0.89  | 0.52 | 9.91  |
| 1.88 | DAZAP1    | 25470886  | DAZ associated protein 1 isoform b                                            | Whole cell | 1  | 0.95  | 0.40 | 19.05 | 0.98  | 0.40 | 18.88 |
| 1.88 | FAM3C     | 91807125  | family with sequence similarity 3, member C                                   | Whole cell | 1  | 1.63  | 0.43 | 2.11  | 1.84  | 0.36 | 2.11  |
| 1.86 | GNB1      | 11321585  | guanine nucleotide-binding protein, beta-1 subunit                            | Whole cell | 0  | 2.05  | 0.18 | 2.11  | 1.79  | 0.17 | 2.19  |
| 1.83 | CELSR3    | 13325066  | cadherin EGF LAG seven-pass G-type receptor 3                                 | Whole cell | 1  | 5.75  | 0.14 | 2.09  | 9.20  | 0.11 | 2.09  |
| 1.82 | FLOT2     | 94538362  | flotillin 2                                                                   | Whole cell | 1  | 1.43  | 0.52 | 2.09  | 0.83  | 0.74 | 2.09  |
| 1.8  | ATXN2     | 51479160  | ataxin 2                                                                      | Whole cell | 1  | 15.42 | 0.12 | 33.11 | 17.22 | 0.11 | 33.11 |
| 1.76 | CNPY3     | 33942072  | trinucleotide repeat containing 5 isoform 1                                   | Whole cell | 1  | 0.34  | 0.22 | 2.11  | 0.53  | 0.36 | 2.11  |
| 1.76 | GNL3      | 45643129  | guanine nucleotide binding protein-like 3 isoform 2                           | Whole cell | 1  | 1.39  | 0.55 | 2.09  | 1.21  | 0.69 | 2.09  |
| 1.76 | MTUS1     | 50348626  | mitochondrial tumor suppressor 1 isoform 4                                    | Whole cell | 1  | 1.38  | 0.55 | 2.09  | 1.22  | 0.68 | 2.09  |
| 1.76 | SHANK3    | 122937241 | proline-rich synapse-associated protein 2                                     | Whole cell | 1  | 4.33  | 0.16 | 2.09  | 4.83  | 0.15 | 2.09  |
| 1.75 | GLUL      | 74271837  | glutamine synthetase                                                          | Whole cell | 1  | 1.05  | 0.91 | 2.09  | 0.82  | 0.70 | 2.09  |
| 1.74 | CARM1     | 40288288  | coactivator-associated arginine methyltransferase 1                           | Whole cell | 1  | 4.33  | 0.17 | 2.11  | 4.70  | 0.16 | 2.11  |
| 1.74 | LOC732155 | 113424999 | PREDICTED: hypothetical protein                                               | Whole cell | 0  | 0.17  | 0.14 | 2.11  | 0.22  | 0.16 | 2.11  |
| 1.73 | COL16A1   | 100913220 | alpha 1 type XVI collagen                                                     | Whole cell | 0  | 1.67  | 0.33 | 1.38  | 1.77  | 0.31 | 1.38  |
| 1.73 | WDR16     | 124028512 | WD40-repeat protein upregulated in HCC isoform b                              | Whole cell | 1  | 0.91  | 0.87 | 2.09  | 1.03  | 0.94 | 2.09  |
| 1.72 | LRPAP1    | 4505021   | low density lipoprotein receptor-related protein associated protein 1         | Whole cell | 1  | 0.63  | 0.46 | 2.09  | 0.88  | 0.81 | 2.09  |
| 1.72 | ARF4      | 113415078 | PREDICTED: similar to ADP-ribosylation factor 4                               | Whole cell | 1  | 0.02  | 0.13 | 28.05 | 0.06  | 0.14 | 13.93 |
| 1.72 | LOC728317 | 113430177 | PREDICTED: similar to melanoma associated antigen (mutated) 1-like 1          | Whole cell | 0  | 0.94  | 0.91 | 2.09  | 1.02  | 0.96 | 2.09  |
| 1.72 | SNRNP40   | 115298668 | WD repeat domain 57 (U5 snRNP specific)                                       | Whole cell | 1  | 1.61  | 0.43 | 2.09  | 1.66  | 0.41 | 2.09  |
| 1.71 | PLB1      | 76096366  | phospholipase B1                                                              | Whole cell | 1  | 0.28  | 0.19 | 2.09  | 0.70  | 0.54 | 2.11  |
| 1.7  | HIST1H1E  | 4885379   | histone cluster 1, H1e                                                        | Whole cell | 7  | 0.65  | 0.48 | 2.09  | 0.77  | 0.63 | 2.09  |
| 1.7  | BET1      | 5031611   | blocked early in transport 1                                                  | Whole cell | 1  | 0.95  | 0.93 | 2.09  | 0.94  | 0.92 | 2.09  |
| 1.7  | THY1      | 19923362  | Thy-1 cell surface antigen                                                    | Whole cell | 1  | 0.38  | 0.25 | 2.09  | 0.70  | 0.55 | 2.09  |
| 1.7  | LOC729328 | 113414640 | PREDICTED: hypothetical protein                                               | Whole cell | 1  | 1.10  | 0.84 | 2.09  | 0.88  | 0.81 | 2.09  |
| 1.64 | SMS       | 21264341  | spermine synthase                                                             | Whole cell | 0  | 0.70  | 0.54 | 2.09  | 0.86  | 0.78 | 2.09  |

|      |           |           |                                                                    |            |   |      |      |       |      |      |       |
|------|-----------|-----------|--------------------------------------------------------------------|------------|---|------|------|-------|------|------|-------|
| 1.63 | SLC25A37  | 82775373  | mitochondrial solute carrier protein                               | Whole cell | 0 | 1.06 | 0.90 | 2.09  | 1.00 | 0.98 | 2.09  |
| 1.56 | TPP1      | 5729770   | tripeptidyl-peptidase I preproprotein                              | Whole cell | 1 | 0.85 | 0.76 | 2.09  | 0.51 | 0.34 | 2.09  |
| 1.55 | SNRPG     | 4507133   | small nuclear ribonucleoprotein polypeptide G                      | Whole cell | 1 | 0.95 | 0.44 | 14.72 | 0.97 | 0.49 | 12.36 |
| 1.53 | SGTA      | 4506921   | small glutamine-rich tetratricopeptide                             | Whole cell | 1 | 2.03 | 0.32 | 2.09  | 2.23 | 0.29 | 2.11  |
| 1.52 | ATP5L     | 51479156  | ATP synthase, H+ transporting, mitochondrial F0 complex, subunit G | Whole cell | 1 | 0.95 | 0.92 | 2.09  | 0.95 | 0.93 | 2.09  |
| 1.49 | PLEKH02   | 33457316  | pleckstrin homology domain containing, family Q member 1           | Whole cell | 1 | 3.80 | 0.18 | 2.11  | 3.70 | 0.18 | 2.11  |
| 1.48 | RASA1     | 4506431   | RAS p21 protein activator 1 isoform 1                              | Whole cell | 0 | 0.72 | 0.57 | 2.09  | 0.60 | 0.42 | 2.09  |
| 1.47 | ITGB4     | 54607035  | integrin beta 4 isoform 1                                          | Whole cell | 0 | 1.19 | 0.84 | 6.55  | 0.90 | 0.67 | 12.71 |
| 1.46 | RET       | 10862703  | ret proto-oncogene isoform a                                       | Whole cell | 0 | 2.07 | 0.31 | 2.11  | 2.00 | 0.33 | 3.05  |
| 1.46 | GPKOW     | 15811782  | G patch domain and KOW motifs                                      | Whole cell | 1 | 0.74 | 0.59 | 2.09  | 0.74 | 0.60 | 2.09  |
| 1.46 | NUP54     | 26051237  | nucleoporin 54kDa                                                  | Whole cell | 1 | 0.22 | 0.16 | 2.11  | 0.38 | 0.25 | 2.11  |
| 1.46 | PCNT      | 81295809  | pericentrin (kendrin)                                              | Whole cell | 0 | 0.66 | 0.49 | 2.09  | 0.52 | 0.34 | 2.09  |
| 1.45 | NRXN1     | 14149613  | neurexin 1 isoform alpha                                           | Whole cell | 1 | 0.12 | 0.12 | 2.11  | 0.21 | 0.15 | 2.09  |
| 1.45 | CARD11    | 16507952  | caspase recruitment domain family, member 11                       | Whole cell | 1 | 3.94 | 0.18 | 2.11  | 3.91 | 0.18 | 2.11  |
| 1.44 | CPNE3     | 4503015   | copine III                                                         | Whole cell | 1 | 0.71 | 0.52 | 2.09  | 0.59 | 0.41 | 2.09  |
| 1.43 | TARDBP    | 6678271   | TAR DNA binding protein                                            | Whole cell | 0 | 1.29 | 0.45 | 2.09  | 1.13 | 0.67 | 2.88  |
| 1.43 | PFDN6     | 7657162   | HLA class II region expressed gene KE2                             | Whole cell | 0 | 0.98 | 0.26 | 2.73  | 1.10 | 0.75 | 2.73  |
| 1.43 | DNAH11    | 51479173  | dynein, axonemal, heavy chain 11                                   | Whole cell | 0 | 0.68 | 0.37 | 3.91  | 0.64 | 0.33 | 2.09  |
| 1.42 | DR1       | 4503381   | down-regulator of transcription 1                                  | Whole cell | 1 | 0.59 | 0.41 | 2.09  | 0.70 | 0.54 | 2.09  |
| 1.42 | ERAL1     | 24307899  | Era G-protein-like 1                                               | Whole cell | 1 | 3.47 | 0.19 | 2.09  | 3.16 | 0.21 | 2.11  |
| 1.42 | MAPK1     | 66932916  | mitogen-activated protein kinase 1                                 | Whole cell | 1 | 0.54 | 0.37 | 2.09  | 0.49 | 0.32 | 2.09  |
| 1.42 | SLC16A8   | 114796626 | solute carrier family 16, member 8                                 | Whole cell | 1 | 0.88 | 0.81 | 2.09  | 0.63 | 0.46 | 2.09  |
| 1.41 | SF3B14    | 7706326   | splicing factor 3B, 14 kDa subunit                                 | Whole cell | 1 | 0.92 | 0.78 | 5.15  | 1.02 | 0.95 | 6.14  |
| 1.41 | DUSP5     | 62865890  | dual specificity phosphatase 5                                     | Whole cell | 1 | 0.57 | 0.39 | 2.11  | 1.20 | 0.71 | 2.09  |
| 1.41 | NBLA00301 | 88981231  | PREDICTED: hypothetical protein LOC79804 isoform 5                 | Whole cell | 0 | 0.90 | 0.85 | 2.11  | 1.60 | 0.44 | 2.09  |
| 1.4  | TEX264    | 7706708   | testis expressed sequence 264                                      | Whole cell | 1 | 0.50 | 0.33 | 2.09  | 0.61 | 0.44 | 2.11  |
| 1.4  | SNX27     | 31742501  | sorting nexin family member 27                                     | Whole cell | 1 | 1.32 | 0.60 | 2.09  | 1.18 | 0.73 | 2.09  |
| 1.4  | SRM       | 63253298  | spermidine synthase                                                | Whole cell | 1 | 0.24 | 0.17 | 2.11  | 0.26 | 0.18 | 2.11  |
| 1.39 | NUDT21    | 5901926   | cleavage and polyadenylation specific factor 5                     | Whole cell | 0 | 0.29 | 0.20 | 2.09  | 0.25 | 0.18 | 2.11  |
| 1.38 | XIRP2     | 119372317 | cardiomyopathy associated 3 isoform 1                              | Whole cell | 0 | 2.00 | 0.33 | 2.11  | 2.61 | 0.24 | 2.09  |
| 1.36 | NAT13     | 13376735  | Mak3 homolog                                                       | Whole cell | 0 | 1.25 | 0.66 | 2.09  | 0.74 | 0.60 | 2.11  |
| 1.36 | TMEM132A  | 30089937  | transmembrane protein 132A isoform b                               | Whole cell | 0 | 0.69 | 0.05 | 22.28 | 2.03 | 0.04 | 25.35 |
| 1.35 | PPIL2     | 22547215  | peptidylprolyl isomerase-like 2 isoform b                          | Whole cell | 1 | 1.06 | 0.90 | 2.09  | 0.95 | 0.93 | 2.09  |
| 1.34 | PLCG1     | 33598948  | phospholipase C gamma 1 isoform a                                  | Whole cell | 0 | 0.33 | 0.22 | 2.11  | 0.70 | 0.54 | 2.11  |
| 1.34 | LOC731160 | 113416154 | PREDICTED: hypothetical protein                                    | Whole cell | 0 | 2.01 | 0.32 | 2.09  | 1.71 | 0.40 | 2.11  |
| 1.33 | C11orf58  | 7657234   | small acidic protein                                               | Whole cell | 1 | 0.10 | 0.16 | 3.13  | 0.08 | 0.15 | 2.94  |
| 1.33 | ERP44     | 52487191  | thioredoxin domain containing 4 (endoplasmic reticulum)            | Whole cell | 0 | 0.90 | 0.86 | 2.09  | 0.54 | 0.37 | 2.09  |
| 1.33 | LOC731400 | 113426546 | PREDICTED: hypothetical protein                                    | Whole cell | 0 | 1.37 | 0.56 | 2.09  | 1.28 | 0.63 | 2.09  |
| 1.31 | TRAPPC3   | 7656926   | BET3 homolog                                                       | Whole cell | 1 | 0.42 | 0.27 | 2.11  | 0.42 | 0.27 | 2.09  |
| 1.31 | MAT2B     | 11034825  | methionine adenosyltransferase II, beta isoform 1                  | Whole cell | 1 | 1.28 | 0.63 | 2.09  | 1.25 | 0.67 | 2.09  |
| 1.31 | SFRP1     | 56117838  | secreted frizzled-related protein 1                                | Whole cell | 0 | 0.64 | 0.47 | 2.09  | 0.75 | 0.61 | 2.11  |
| 1.31 | C6orf165  | 72534780  | hypothetical protein LOC154313 isoform 1                           | Whole cell | 1 | 1.57 | 0.45 | 2.09  | 1.10 | 0.83 | 2.09  |
