# Supplementary material
Source: PubMed Central journal article supplement (PMC3086450)
Supplement: NIHMS283894-supplement-Supplementary_Table_2.pdf [file NIHMS283894-supplement-Supplementary_Table_2.pdf]

**Supplementary Table 2: Subcellular localization of proteins identified in hESCs and hECCs.**

**Chaerkady et al. - Comparative proteomics of human embryonic stem cells and embryonal carcinoma cells**

| <b>GI Accession</b> | <b>HPRD ID</b> | <b>Gene Symbol</b> | <b>Sub-Cellular Localization [HPRD]</b> | <b>Alternate Sub-Cellular Localization [HPRD]</b> | <b>Alternate Sub-Cellular Localization [HPRD]</b> |
|---------------------|----------------|--------------------|-----------------------------------------|---------------------------------------------------|---------------------------------------------------|
| 100913206           | 04386          | <i>DHX9</i>        | Nucleus(GO:0005634)                     | Nucleolus(GO:0005730)                             | Cytoplasmic vesicle(GO:0016023)                   |
| 100913220           | 00381          | <i>COL16A1</i>     | Extracellular(GO:0005576)               |                                                   |                                                   |
| 10092615            | 09934          | <i>ETNK1</i>       | Cytoplasm(GO:0005737)                   |                                                   |                                                   |
| 10190670            | 05938          | <i>GDF3</i>        | Extracellular(GO:0005576)               |                                                   |                                                   |
| 101943240           | 07540          | <i>GTF3C1</i>      | Nucleus(GO:0005634)                     |                                                   |                                                   |
| 10337603            | 09116          | <i>LEFTY1</i>      | -                                       |                                                   |                                                   |
| 103471997           | 10161          | <i>POLR1A</i>      | Nucleolus(GO:0005730)                   |                                                   |                                                   |
| 103472005           | 08902          | <i>MKI67</i>       | Nucleolus(GO:0005730)                   | Cytoplasm(GO:0005737)                             | Nucleus(GO:0005634)                               |
| 105990514           | 04543          | <i>FLNB</i>        | Cytoplasm(GO:0005737)                   | Plasma membrane(GO:0005886)                       | Nucleus(GO:0005634)                               |
| 10801345            | 11740          | <i>EIF3K</i>       | Cytoplasm(GO:0005737)                   | Nucleus(GO:0005634)                               |                                                   |
| 10835010            | 03026          | <i>CTNND1</i>      | Cytoplasm(GO:0005737)                   | Nucleus(GO:0005634)                               |                                                   |
| 10835049            | 01323          | <i>RHOA</i>        | Cytoplasm(GO:0005737)                   | Nucleus(GO:0005634)                               | Plasma membrane(GO:0005886)                       |
| 10835063            | 01246          | <i>NPM1</i>        | Nucleolus(GO:0005730)                   | Nucleus(GO:0005634)                               | Centrosome(GO:0005813)                            |
| 10835067            | 00168          | <i>SSB</i>         | Nucleus(GO:0005634)                     | Cytoplasm(GO:0005737)                             | Plasma membrane(GO:0005886)                       |
| 10835073            | 01187          | <i>NMT1</i>        | Ribosome(GO:0005840)                    | Nucleus(GO:0005634)                               |                                                   |
| 10862703            | 01266          | <i>RET</i>         | Plasma membrane(GO:0005886)             |                                                   |                                                   |
| 10863889            | 10440          | <i>SART1</i>       | Nucleus(GO:0005634)                     | Cytoplasm(GO:0005737)                             |                                                   |
| 10863945            | 08935          | <i>XRCC5</i>       | Nucleus(GO:0005634)                     | Nucleolus(GO:0005730)                             | Mitochondrion(GO:0005739)                         |
| 10863977            | 06282          | <i>LSM2</i>        | Cytoplasm(GO:0005737)                   | Nucleus(GO:0005634)                               |                                                   |
| 10864017            | 17467          | <i>ENOPH1</i>      | -                                       |                                                   |                                                   |
| 10864049            | 16588          | <i>FAM60A</i>      | Cytoplasm(GO:0005737)                   | Nucleus(GO:0005634)                               |                                                   |
| 108773784           | 03132          | <i>ABCE1</i>       | Cytoplasm(GO:0005737)                   | Mitochondrion(GO:0005739)                         |                                                   |
| 108773801           | 01996          | <i>GLDC</i>        | Mitochondrion(GO:0005739)               |                                                   |                                                   |
| 108773810           | 01042          | <i>LARS</i>        | Mitochondrion(GO:0005739)               | Cytosol(GO:0005829)                               |                                                   |
| 10880136            | 00146          | <i>ARRB1</i>       | Cytoplasm(GO:0005737)                   | Plasma membrane(GO:0005886)                       | Nucleus(GO:0005634)                               |
| 108936950           | 07705          | <i>CCDC25</i>      | -                                       |                                                   |                                                   |
| 109148508           | 08493          | <i>OTUB1</i>       | -                                       |                                                   |                                                   |
| 109148542           | 03042          | <i>AARS</i>        | Cytoplasm(GO:0005737)                   | Cytosol(GO:0005829)                               | Mitochondrion(GO:0005739)                         |
| 109240550           | 10172          | <i>PSPC1</i>       | Nucleus(GO:0005634)                     | Nucleolus(GO:0005730)                             |                                                   |
| 109389365           | 02377          | <i>G6PD</i>        | Cytoplasm(GO:0005737)                   | Endoplasmic reticulum(GO:0005783)                 |                                                   |
| 10947137            | 12403          | <i>ABCF2</i>       | Mitochondrion(GO:0005739)               | Peroxisome(GO:0005777)                            |                                                   |
| 109638749           | 03671          | <i>SRP72</i>       | Nucleolus(GO:0005730)                   | Cytosol(GO:0005829)                               | Cytoplasm(GO:0005737)                             |
| 109715858           | 08515          | <i>CARHSP1</i>     | Cytoplasm(GO:0005737)                   | Nucleus(GO:0005634)                               |                                                   |
| 109948283           | 08822          | <i>KIAA0020</i>    | Nucleus(GO:0005634)                     | Nucleolus(GO:0005730)                             |                                                   |
| 109948304           | 11588          | <i>SMU1</i>        | Nucleus(GO:0005634)                     | Cytoplasm(GO:0005737)                             |                                                   |
| 110227866           | 16257          | <i>UNC84A</i>      | Nucleus(GO:0005634)                     | Cytoplasm(GO:0005737)                             |                                                   |
| 11024698            | 04949          | <i>MGEA5</i>       | Cytoplasm(GO:0005737)                   | Integral to membrane(GO:0016021)                  | Nucleus(GO:0005634)                               |

|           |       |          |                                   |                                    |                              |
|-----------|-------|----------|-----------------------------------|------------------------------------|------------------------------|
| 110347425 | 09277 | SMC2     | Nucleus(GO:0005634)               | Mitochondrion(GO:0005739)          | Nucleolus(GO:0005730)        |
| 11034825  | 05701 | MAT2B    | Cytoplasm(GO:0005737)             |                                    |                              |
| 11034845  | 08513 | RPRD1B   | Nucleus(GO:0005634)               |                                    |                              |
| 110349719 | 01787 | TTN      | Cytoplasm(GO:0005737)             | Sarcoplasmic reticulum(GO:0016529) | Nucleus(GO:0005634)          |
| 11056036  | 13782 | TTLL12   | Nucleus(GO:0005634)               | Cytoplasm(GO:0005737)              |                              |
| 11056044  | 01527 | PPA1     | Cytoplasm(GO:0005737)             | Mitochondrion(GO:0005739)          |                              |
| 110611156 | 05069 | LAMC3    | Extracellular(GO:0005576)         | Plasma membrane(GO:0005886)        |                              |
| 110611220 | 11796 | RRBP1    | Endoplasmic reticulum(GO:0005783) | Cytoplasm(GO:0005737)              | Nucleus(GO:0005634)          |
| 110815802 | 12969 | C9orf64  | -                                 |                                    |                              |
| 111038133 | 10708 | NGDN     | Nucleolus(GO:0005730)             | Nucleus(GO:0005634)                |                              |
| 11125770  | 02915 | AIMP2    | Cytoplasm(GO:0005737)             | Nucleus(GO:0005634)                |                              |
| 11125772  | 07519 | MARCKS   | Plasma membrane(GO:0005886)       | Cytoplasm(GO:0005737)              |                              |
| 11128019  | 00479 | CYCS     | Mitochondrion(GO:0005739)         | Cytosol(GO:0005829)                | Cytoplasm(GO:0005737)        |
| 11141863  | 13070 | CLDN6    | Plasma membrane(GO:0005886)       |                                    |                              |
| 11225260  | 00535 | TOP1     | Nucleus(GO:0005634)               | Nucleolus(GO:0005730)              | Cytoplasm(GO:0005737)        |
| 112293277 | 13236 | DNAJC8   | Nucleolus(GO:0005730)             |                                    |                              |
| 112363070 | 09991 | HSPBP1   | -                                 |                                    |                              |
| 112382250 | 01683 | SPTBN1   | Cytoskeleton(GO:0005856)          | Nucleus(GO:0005634)                | Cytoplasm(GO:0005737)        |
| 112421122 | 10915 | DNAJC13  | Endosome(GO:0005768)              |                                    |                              |
| 11321585  | 00766 | GNB1     | Plasma membrane(GO:0005886)       | Mitochondrion(GO:0005739)          |                              |
| 11321591  | 01229 | HMGB2    | Nucleus(GO:0005634)               | Cytoplasm(GO:0005737)              | Mitochondrion(GO:0005739)    |
| 11321601  | 01384 | PFKP     | Cytoplasm(GO:0005737)             |                                    |                              |
| 11321607  | 05145 | TRIP13   | Nucleus(GO:0005634)               |                                    |                              |
| 11321634  | 05026 | CD2AP    | Cytoplasm(GO:0005737)             |                                    |                              |
| 113412739 | 09935 | AHCTF1   | Nucleus(GO:0005634)               |                                    |                              |
| 113414197 | 16570 | BZW1     | Nucleus(GO:0005634)               | Cytoplasm(GO:0005737)              |                              |
| 113415078 | 03107 | ARF4     | Cytoplasm(GO:0005737)             | Golgi apparatus(GO:0005794)        | Plasma membrane(GO:0005886)  |
| 113415228 | 13627 | CDV3     | Nucleus(GO:0005634)               |                                    |                              |
| 113418321 | 12842 | C6orf115 | -                                 |                                    |                              |
| 113418916 | 10899 | INTS1    | Nucleus(GO:0005634)               |                                    |                              |
| 113421227 | 04640 | FUBP3    | Nucleus(GO:0005634)               |                                    |                              |
| 113422923 | 10952 | DDB1     | Cytoplasm(GO:0005737)             | Nucleolus(GO:0005730)              | Nucleus(GO:0005634)          |
| 113423576 | 19309 | KIAA0692 | -                                 |                                    |                              |
| 113423966 | 07038 | UBC      | Cytoplasm(GO:0005737)             |                                    |                              |
| 113426288 | 00162 | ATP6VOC  | Lysosome(GO:0005764)              | Endosome(GO:0005768)               | Golgi apparatus(GO:0005794)  |
| 113428506 | 11686 | WIZ      | Nucleus(GO:0005634)               |                                    |                              |
| 11386147  | 01460 | PSAP     | Lysosome(GO:0005764)              | Plasma membrane(GO:0005886)        | Extracellular(GO:0005576)    |
| 11415026  | 16045 | RPL18A   | Cytoplasm(GO:0005737)             | Mitochondrion(GO:0005739)          | Nucleolus(GO:0005730)        |
| 114155142 | 08927 | TPR      | Cytoplasm(GO:0005737)             | Nucleolus(GO:0005730)              | Nuclear membrane(GO:0005635) |
| 114155144 | 01840 | TPM3     | Cytoplasm(GO:0005737)             | Cytosol(GO:0005829)                | Extracellular(GO:0005576)    |
| 114326550 | 02343 | SLC7A3   | Plasma membrane(GO:0005886)       | Nucleus(GO:0005634)                |                              |

|           |       |                 |                                            |                                   |                             |
|-----------|-------|-----------------|--------------------------------------------|-----------------------------------|-----------------------------|
| 114796626 | 11568 | <i>SLC16A8</i>  | Plasma membrane(GO:0005886)                |                                   |                             |
| 115298668 | 08481 | <i>SNRNP40</i>  | Nucleus(GO:0005634)                        |                                   |                             |
| 115298674 | 00574 | <i>NID1</i>     | Extracellular(GO:0005576)                  |                                   |                             |
| 115298682 | 16539 | <i>BAT2D1</i>   | Cytoplasm(GO:0005737)                      |                                   |                             |
| 115387104 | 04109 | <i>ALDH9A1</i>  | Cytoplasm(GO:0005737)                      |                                   |                             |
| 115430252 | 09627 | <i>STK39</i>    | Cytoplasm(GO:0005737)                      | Nucleus(GO:0005634)               |                             |
| 115527080 | 04633 | <i>MTA1</i>     | Nucleus(GO:0005634)                        | Cytoplasm(GO:0005737)             |                             |
| 115583685 | 02816 | <i>SLC16A1</i>  | Plasma membrane(GO:0005886)                | Nucleus(GO:0005634)               | Mitochondrion(GO:0005739)   |
| 11559929  | 09887 | <i>COPG</i>     | Golgi apparatus(GO:0005794)                |                                   |                             |
| 116063573 | 02060 | <i>FLNA</i>     | Cytoplasm(GO:0005737)                      | Mitochondrion(GO:0005739)         | Plasma membrane(GO:0005886) |
| 116174780 | 08456 | <i>SEC24A</i>   | Endoplasmic reticulum(GO:0005783)          |                                   |                             |
| 116235460 | 08106 | <i>YTHDF3</i>   | -                                          |                                   |                             |
| 116256489 | 10360 | <i>SEPT9</i>    | Cytoskeleton(GO:0005856)                   | Nucleus(GO:0005634)               | Microtubule(GO:0005874)     |
| 116284376 | 05521 | <i>HDAC2</i>    | Nucleus(GO:0005634)                        | Cytoplasm(GO:0005737)             | Nucleolus(GO:0005730)       |
| 11641303  | 10662 | <i>ATL2</i>     | Nucleus(GO:0005634)                        |                                   |                             |
| 116734717 | 01377 | <i>ALPL</i>     | Plasma membrane(GO:0005886)                | Cytoplasm(GO:0005737)             |                             |
| 116805322 | 00018 | <i>FLNC</i>     | Cytoplasm(GO:0005737)                      |                                   |                             |
| 116805340 | 02617 | <i>GARS</i>     | Cytoplasm(GO:0005737)                      | Mitochondrion(GO:0005739)         | Nucleus(GO:0005634)         |
| 116812577 | 17456 | <i>LUC7L2</i>   | Nucleolus(GO:0005730)                      | Cytoplasm(GO:0005737)             | Nucleus(GO:0005634)         |
| 116812591 | 17967 | <i>RER1</i>     | Golgi apparatus(GO:0005794)                | Endoplasmic reticulum(GO:0005783) |                             |
| 116812595 | 06814 | <i>BPNT1</i>    | -                                          |                                   |                             |
| 116812636 | 07026 | <i>OSGEPL1</i>  | -                                          |                                   |                             |
| 116875767 | 03002 | <i>TJP1</i>     | Cell surface(GO:0009986)                   | Nucleus(GO:0005634)               | Extracellular(GO:0005576)   |
| 117168248 | 11037 | <i>PTPLAD1</i>  | Mitochondrion(GO:0005739)                  | Integral to membrane(GO:0016021)  |                             |
| 117190254 | 01243 | <i>HNRNPC</i>   | Nucleus(GO:0005634)                        | Nucleolus(GO:0005730)             | Mitochondrion(GO:0005739)   |
| 117553580 | 06260 | <i>AP3D1</i>    | Cytoplasm(GO:0005737)                      | Golgi apparatus(GO:0005794)       |                             |
| 117553627 | 02156 | <i>ASMTL</i>    | Cytoplasm(GO:0005737)                      |                                   |                             |
| 117938759 | 00761 | <i>GNAS</i>     | Plasma membrane(GO:0005886)                |                                   |                             |
| 118150660 | 13988 | <i>ZC3H15</i>   | Nucleus(GO:0005634)                        | Cytoplasm(GO:0005737)             |                             |
| 118402586 | 00730 | <i>GLO1</i>     | Cytoplasm(GO:0005737)                      |                                   |                             |
| 118498359 | 10897 | <i>RSL1D1</i>   | Nucleolus(GO:0005730)                      | Nucleus(GO:0005634)               | Cytoplasm(GO:0005737)       |
| 118498362 | 02661 | <i>KTN1</i>     | Nucleus(GO:0005634)                        | Endoplasmic reticulum(GO:0005783) | Cytoplasm(GO:0005737)       |
| 118572613 | 06913 | <i>SRRM2</i>    | Nucleus(GO:0005634)                        | Cytoplasm(GO:0005737)             |                             |
| 118601081 | 18952 | <i>HNRNPUL2</i> | Nucleus(GO:0005634)                        |                                   |                             |
| 11863154  | 02893 | <i>ARCN1</i>    | Cytoplasm(GO:0005737)                      | Cytosol(GO:0005829)               | Golgi apparatus(GO:0005794) |
| 119220605 | 07029 | <i>USP10</i>    | Nucleus(GO:0005634)                        | Cytoplasm(GO:0005737)             |                             |
| 119226260 | 13051 | <i>CHERP</i>    | Endoplasmic reticulum membrane(GO:0005783) | Perinuclear region(GO:0048471)    | Cytoplasm(GO:0005737)       |
| 119372317 | 10267 | <i>XIRP2</i>    | -                                          |                                   |                             |
| 119395729 | 02020 | <i>CTSA</i>     | Lysosome(GO:0005764)                       | Golgi apparatus(GO:0005794)       | Extracellular(GO:0005576)   |
| 119395740 | 00945 | <i>ITGA6</i>    | Plasma membrane(GO:0005886)                |                                   |                             |
| 119395750 | 00763 | <i>KRT1</i>     | Plasma membrane(GO:0005886)                | Cytoskeleton(GO:0005856)          |                             |

|           |       |                 |                                   |                                   |                                 |
|-----------|-------|-----------------|-----------------------------------|-----------------------------------|---------------------------------|
| 119395758 | 03670 | <i>DIAPH1</i>   | Cytoplasm(GO:0005737)             | Mitochondrion(GO:0005739)         |                                 |
| 119395760 | 03670 | <i>DIAPH1</i>   | Cytoplasm(GO:0005737)             | Mitochondrion(GO:0005739)         |                                 |
| 11968047  | 15096 | <i>POLR1E</i>   | Nucleolus(GO:0005730)             | Nucleus(GO:0005634)               |                                 |
| 11968182  | 01601 | <i>RPS18</i>    | Ribosome(GO:0005840)              | Nucleolus(GO:0005730)             |                                 |
| 119964726 | 00928 | <i>IGF2R</i>    | Plasma membrane(GO:0005886)       | Nucleus(GO:0005634)               | Cytoplasm(GO:0005737)           |
| 12025678  | 05222 | <i>ACTN4</i>    | Cytoplasm(GO:0005737)             | Plasma membrane(GO:0005886)       | Mitochondrion(GO:0005739)       |
| 120433593 | 08832 | <i>DBI</i>      | Mitochondrion(GO:0005739)         | Extracellular(GO:0005576)         | Cytoplasm(GO:0005737)           |
| 12056465  | 00617 | <i>FBL</i>      | Nucleolus(GO:0005730)             | Nucleus(GO:0005634)               |                                 |
| 12056473  | 07285 | <i>NANS</i>     | Cytoplasm(GO:0005737)             | Cytosol(GO:0005829)               |                                 |
| 122937211 | 11078 | <i>KIAA0368</i> | Centrosome(GO:0005813)            | Endoplasmic reticulum(GO:0005783) | Cytoplasmic vesicle(GO:0016023) |
| 122937227 | 19056 | <i>SR140</i>    | -                                 |                                   |                                 |
| 122937241 | 18979 | <i>SHANK3</i>   | Dendrite(GO:0030425)              | Postsynaptic density(GO:0014069)  | Cytoplasm(GO:0005737)           |
| 122937388 | 19055 | <i>MGA</i>      | Nucleus(GO:0005634)               |                                   |                                 |
| 122939157 | 07370 | <i>GEMIN4</i>   | Nucleus(GO:0005634)               | Nucleolus(GO:0005730)             | Cytosol(GO:0005829)             |
| 123173757 | 11484 | <i>RAVER1</i>   | Nucleus(GO:0005634)               | Cytoplasm(GO:0005737)             |                                 |
| 12383056  | 14358 | <i>MAP1LC3B</i> | Integral to membrane(GO:0016021)  |                                   |                                 |
| 124028512 | 14072 | <i>WDR16</i>    | Cytoplasm(GO:0005737)             |                                   |                                 |
| 124028525 | 09947 | <i>FARSB</i>    | Cytoplasm(GO:0005737)             | Nucleolus(GO:0005730)             |                                 |
| 12408675  | 09658 | <i>PFDN2</i>    | -                                 |                                   |                                 |
| 124494238 | 09411 | <i>MYO1C</i>    | Plasma membrane(GO:0005886)       | Nucleolus(GO:0005730)             | Cytoskeleton(GO:0005856)        |
| 124494254 | 03685 | <i>PA2G4</i>    | Nucleus(GO:0005634)               | Cytosol(GO:0005829)               | Cytoplasm(GO:0005737)           |
| 12597653  | 07770 | <i>NT5DC2</i>   | -                                 |                                   |                                 |
| 125988409 | 02771 | <i>IK</i>       | Nucleus(GO:0005634)               |                                   |                                 |
| 126012562 | 00138 | <i>LRP1</i>     | Endoplasmic reticulum(GO:0005783) | Nucleus(GO:0005634)               | Golgi apparatus(GO:0005794)     |
| 126032311 | 03664 | <i>MLL2</i>     | Nucleus(GO:0005634)               |                                   |                                 |
| 126032350 | 02941 | <i>PRKDC</i>    | Nucleus(GO:0005634)               | Mitochondrion(GO:0005739)         | Nucleolus(GO:0005730)           |
| 12667788  | 01177 | <i>MYH9</i>     | Cytoplasm(GO:0005737)             | Nucleus(GO:0005634)               | Mitochondrion(GO:0005739)       |
| 12746590  | 04016 | <i>CTBP2</i>    | Nucleus(GO:0005634)               | Cytoplasm(GO:0005737)             |                                 |
| 12962937  | 05646 | <i>AAAS</i>     | Peroxisome(GO:0005777)            | Nuclear membrane(GO:0005635)      |                                 |
| 13027378  | 09048 | <i>GNPDA1</i>   | -                                 |                                   |                                 |
| 13027640  | 05489 | <i>AASS</i>     | Mitochondrion(GO:0005739)         |                                   |                                 |
| 13128860  | 03143 | <i>HDAC1</i>    | Nucleus(GO:0005634)               | Mitochondrion(GO:0005739)         | Nucleolus(GO:0005730)           |
| 13128970  | 14736 | <i>MRP63</i>    | Mitochondrion(GO:0005739)         |                                   |                                 |
| 13128992  | 14528 | <i>C19orf43</i> | -                                 |                                   |                                 |
| 13129016  | 15107 | <i>DDA1</i>     | -                                 |                                   |                                 |
| 13129092  | 14687 | <i>TMEM109</i>  | -                                 |                                   |                                 |
| 13129100  | 18310 | <i>DCTPP1</i>   | -                                 |                                   |                                 |
| 13236587  | 15541 | <i>TMEM43</i>   | Integral to membrane(GO:0016021)  |                                   |                                 |
| 13259510  | 07206 | <i>DCTN1</i>    | Centrosome(GO:0005813)            | Endoplasmic reticulum(GO:0005783) | Cytoplasm(GO:0005737)           |
| 13325066  | 09179 | <i>CELSR3</i>   | Plasma membrane(GO:0005886)       |                                   |                                 |
| 13375618  | 05916 | <i>DHCR24</i>   | Plasma membrane(GO:0005886)       | Endoplasmic reticulum(GO:0005783) |                                 |

|          |       |                  |                                   |                             |                                   |
|----------|-------|------------------|-----------------------------------|-----------------------------|-----------------------------------|
| 13375872 | 17944 | <i>QTRTD1</i>    | -                                 |                             |                                   |
| 13375938 | 17278 | <i>LIN28</i>     | -                                 |                             |                                   |
| 13376735 | 14350 | <i>NAT13</i>     | -                                 |                             |                                   |
| 13376840 | 15236 | <i>WDR61</i>     | -                                 |                             |                                   |
| 13399322 | 10964 | <i>NAT10</i>     | Nucleus(GO:0005634)               |                             |                                   |
| 13430872 | 07849 | <i>NOL10</i>     | Nucleolus(GO:0005730)             |                             |                                   |
| 13435359 | 10952 | <i>DDB1</i>      | Cytoplasm(GO:0005737)             | Nucleolus(GO:0005730)       | Nucleus(GO:0005634)               |
| 13449277 | 07481 | <i>CYP2S1</i>    | Endoplasmic reticulum(GO:0005783) |                             |                                   |
| 13489054 | 03164 | <i>MAP2K2</i>    | Cytoplasm(GO:0005737)             | Nucleus(GO:0005634)         |                                   |
| 13489083 | 10703 | <i>SAP53</i>     | Cytoplasm(GO:0005737)             | Nucleus(GO:0005634)         |                                   |
| 13489085 | 03340 | <i>UBE2G1</i>    | Cytoplasm(GO:0005737)             | Nucleus(GO:0005634)         | Endoplasmic reticulum(GO:0005783) |
| 13491174 | 04247 | <i>MARCKSL1</i>  | -                                 |                             |                                   |
| 13514831 | 03138 | <i>DDX10</i>     | Nucleus(GO:0005634)               | Nucleolus(GO:0005730)       |                                   |
| 13540523 | 02310 | <i>HMG5</i>      | Nucleus(GO:0005634)               |                             |                                   |
| 13540606 | 11560 | <i>CLPB</i>      | Nucleus(GO:0005634)               |                             |                                   |
| 13569879 | 16493 | <i>ANP32E</i>    | Nucleus(GO:0005634)               | Nucleolus(GO:0005730)       |                                   |
| 13654270 | 06519 | <i>LAS1L</i>     | Nucleus(GO:0005634)               | Nucleolus(GO:0005730)       |                                   |
| 13654278 | 12639 | <i>C14orf156</i> | Nucleus(GO:0005634)               |                             |                                   |
| 13699868 | 01403 | <i>MTHFD1</i>    | Cytoplasm(GO:0005737)             | Mitochondrion(GO:0005739)   | Cytosol(GO:0005829)               |
| 13775198 | 15332 | <i>SH3BGRL3</i>  | Cytoplasm(GO:0005737)             | Plasma membrane(GO:0005886) | Nucleus(GO:0005634)               |
| 13775200 | 18042 | <i>SF3B5</i>     | -                                 |                             |                                   |
| 13876386 | 06500 | <i>EPPK1</i>     | Cytoplasm(GO:0005737)             | Nucleus(GO:0005634)         |                                   |
| 13899231 | 14774 | <i>MRPL9</i>     | Mitochondrion(GO:0005739)         |                             |                                   |
| 13904866 | 04702 | <i>RPL28</i>     | Ribosome(GO:0005840)              | Nucleolus(GO:0005730)       |                                   |
| 13904870 | 04695 | <i>RPS5</i>      | Ribosome(GO:0005840)              | Nucleolus(GO:0005730)       |                                   |
| 13994151 | 09326 | <i>PDLIM1</i>    | Cytoplasm(GO:0005737)             |                             |                                   |
| 13994259 | 10099 | <i>MRPS5</i>     | Mitochondrion(GO:0005739)         |                             |                                   |
| 14043022 | 08864 | <i>MARS</i>      | Cytoplasm(GO:0005737)             | Mitochondrion(GO:0005739)   | Cytosol(GO:0005829)               |
| 14043070 | 01242 | <i>HNRNPA1</i>   | Nucleus(GO:0005634)               | Nucleolus(GO:0005730)       | Mitochondrion(GO:0005739)         |
| 14043072 | 02526 | <i>HNRNPA2B1</i> | Nucleus(GO:0005634)               | Cytoplasm(GO:0005737)       | Mitochondrion(GO:0005739)         |
| 14110407 | 06185 | <i>HNRPDL</i>    | Nucleus(GO:0005634)               | Mitochondrion(GO:0005739)   |                                   |
| 14110417 | 03206 | <i>HNRNPD</i>    | Nucleus(GO:0005634)               | Mitochondrion(GO:0005739)   | Cytoplasm(GO:0005737)             |
| 14110420 | 03206 | <i>HNRNPD</i>    | Nucleus(GO:0005634)               | Mitochondrion(GO:0005739)   | Cytoplasm(GO:0005737)             |
| 14141152 | 01188 | <i>HNRNPM</i>    | Nucleus(GO:0005634)               | Nucleolus(GO:0005730)       | Mitochondrion(GO:0005739)         |
| 14141157 | 03818 | <i>HNRNPH3</i>   | Nucleus(GO:0005634)               | Mitochondrion(GO:0005739)   | Nucleolus(GO:0005730)             |
| 14141159 | 03818 | <i>HNRNPH3</i>   | Nucleus(GO:0005634)               | Mitochondrion(GO:0005739)   | Nucleolus(GO:0005730)             |
| 14141166 | 03129 | <i>PCBP2</i>     | Nucleus(GO:0005634)               | Cytoplasm(GO:0005737)       |                                   |
| 14141168 | 03129 | <i>PCBP2</i>     | Nucleus(GO:0005634)               | Cytoplasm(GO:0005737)       |                                   |
| 14141170 | 07233 | <i>MTA2</i>      | Nucleus(GO:0005634)               | Golgi apparatus(GO:0005794) |                                   |
| 14141193 | 04696 | <i>RPS9</i>      | Ribosome(GO:0005840)              | Nucleolus(GO:0005730)       |                                   |
| 14149613 | 11858 | <i>NRXN1</i>     | Plasma membrane(GO:0005886)       |                             |                                   |

|          |       |                     |                                   |                             |                                   |
|----------|-------|---------------------|-----------------------------------|-----------------------------|-----------------------------------|
| 14149627 | 05293 | <i>USP15</i>        | Cytoplasm(GO:0005737)             | Nucleolus(GO:0005730)       |                                   |
| 14149629 | 10308 | <i>GPN1</i>         | Cytoplasm(GO:0005737)             | Nucleus(GO:0005634)         |                                   |
| 14149680 | 14367 | <i>ESYT1</i>        | Plasma membrane(GO:0005886)       | Golgi apparatus(GO:0005794) | Endoplasmic reticulum(GO:0005783) |
| 14149720 | 07748 | <i>LSG1</i>         | Endoplasmic reticulum(GO:0005783) | Nucleus(GO:0005634)         | Nucleolus(GO:0005730)             |
| 14149730 | 11586 | <i>SMARCAD1</i>     | Nucleus(GO:0005634)               |                             |                                   |
| 14149738 | 07495 | <i>NLN</i>          | Cytoplasm(GO:0005737)             | Plasma membrane(GO:0005886) | Mitochondrion(GO:0005739)         |
| 14149777 | 13640 | <i>HDHD2</i>        | -                                 |                             |                                   |
| 14150100 | 17486 | <i>C1orf57</i>      | -                                 |                             |                                   |
| 14150147 | 15309 | <i>NUDT16L1</i>     | Nucleolus(GO:0005730)             |                             |                                   |
| 14150169 | 12416 | <i>ACBD6</i>        | -                                 |                             |                                   |
| 14165435 | 02834 | <i>HNRNPK</i>       | Nucleus(GO:0005634)               | Mitochondrion(GO:0005739)   | Nucleolus(GO:0005730)             |
| 14165439 | 02834 | <i>HNRNPK</i>       | Nucleus(GO:0005634)               | Mitochondrion(GO:0005739)   | Nucleolus(GO:0005730)             |
| 14210536 | 11349 | <i>TUBB6</i>        | -                                 |                             |                                   |
| 14211889 | 17434 | <i>DPY30</i>        | -                                 |                             |                                   |
| 14249342 | 05628 | <i>INA</i>          | Cytoplasm(GO:0005737)             |                             |                                   |
| 14249536 | 08468 | <i>CIRH1A</i>       | Mitochondrion(GO:0005739)         | Cytosol(GO:0005829)         | Nucleolus(GO:0005730)             |
| 14249678 | 09501 | <i>RBM17</i>        | Nucleus(GO:0005634)               |                             |                                   |
| 14251209 | 04188 | <i>CLIC1</i>        | Nucleus(GO:0005634)               | Plasma membrane(GO:0005886) | Cytoplasm(GO:0005737)             |
| 14251212 | 05859 | <i>DDX20</i>        | Nucleus(GO:0005634)               | Cytoplasm(GO:0005737)       |                                   |
| 14277700 | 04714 | <i>RPS12</i>        | Ribosome(GO:0005840)              | Nucleolus(GO:0005730)       |                                   |
| 14389309 | 06747 | <i>TUBA1C</i>       | Cytoplasm(GO:0005737)             | Nucleus(GO:0005634)         | Microtubule(GO:0005874)           |
| 14589891 | 00227 | <i>CDH3</i>         | Plasma membrane(GO:0005886)       | Extracellular(GO:0005576)   | Cytoplasm(GO:0005737)             |
| 14589953 | 09082 | <i>POLR2H</i>       | Nucleus(GO:0005634)               | Nucleolus(GO:0005730)       |                                   |
| 14591904 | 02762 | <i>RECQL</i>        | Nucleus(GO:0005634)               | Mitochondrion(GO:0005739)   |                                   |
| 14591909 | 04699 | <i>RPL5</i>         | Ribosome(GO:0005840)              | Cytosol(GO:0005829)         | Nucleolus(GO:0005730)             |
| 14591928 | 11543 | <i>SEC23B</i>       | Endoplasmic reticulum(GO:0005783) | Cytoplasm(GO:0005737)       | Golgi apparatus(GO:0005794)       |
| 14670354 | 03399 | <i>GTF2I</i>        | Nucleus(GO:0005634)               | Cytoplasm(GO:0005737)       | Nucleolus(GO:0005730)             |
| 14670356 | 03399 | <i>GTF2I</i>        | Nucleus(GO:0005634)               | Cytoplasm(GO:0005737)       | Nucleolus(GO:0005730)             |
| 14670392 | 10416 | <i>BAZ1B</i>        | Cytoplasm(GO:0005737)             | Nucleus(GO:0005634)         | Nucleolus(GO:0005730)             |
| 14741936 | 19430 | <i>SNRPE1</i>       | Nucleus(GO:0005634)               |                             |                                   |
| 14790119 | 02799 | <i>CASP3</i>        | Cytoplasm(GO:0005737)             | Nucleus(GO:0005634)         | Mitochondrion(GO:0005739)         |
| 14917113 | 18105 | <i>SRPRB</i>        | Endoplasmic reticulum(GO:0005783) | Mitochondrion(GO:0005739)   | Nucleus(GO:0005634)               |
| 15011880 | 06663 | <i>RP6-213H19.1</i> | Golgi apparatus(GO:0005794)       | Cytoplasm(GO:0005737)       | Nucleus(GO:0005634)               |
| 15011974 | 10458 | <i>ARHGEF2</i>      | Cytoskeleton(GO:0005856)          | Cytoplasm(GO:0005737)       | Microtubule(GO:0005874)           |
| 15055539 | 04690 | <i>RPS2</i>         | Ribosome(GO:0005840)              | Mitochondrion(GO:0005739)   | Cytoplasm(GO:0005737)             |
| 15149465 | 00251 | <i>CALD1</i>        | Nucleus(GO:0005634)               | Cytoplasm(GO:0005737)       | Plasma membrane(GO:0005886)       |
| 15149470 | 06949 | <i>SUZ12</i>        | -                                 |                             |                                   |
| 15149476 | 00142 | <i>RARS</i>         | Cytoplasm(GO:0005737)             | Cytosol(GO:0005829)         |                                   |
| 15150811 | 17600 | <i>MRPS36</i>       | Mitochondrion(GO:0005739)         |                             |                                   |
| 15431288 | 10199 | <i>RPL10A</i>       | Ribosome(GO:0005840)              | Nucleolus(GO:0005730)       |                                   |
| 15431290 | 10364 | <i>RPL11</i>        | Ribosome(GO:0005840)              | Nucleoplasm(GO:0005654)     | Mitochondrion(GO:0005739)         |

|          |       |                  |                                   |                                   |                                   |
|----------|-------|------------------|-----------------------------------|-----------------------------------|-----------------------------------|
| 15431293 | 16043 | <i>RPL15</i>     | Ribosome(GO:0005840)              | Nucleolus(GO:0005730)             |                                   |
| 15431297 | 06428 | <i>RPL13</i>     | Ribosome(GO:0005840)              | Mitochondrion(GO:0005739)         | Nucleus(GO:0005634)               |
| 15431301 | 05004 | <i>RPL7</i>      | Ribosome(GO:0005840)              | Mitochondrion(GO:0005739)         | Nucleolus(GO:0005730)             |
| 15451856 | 03028 | <i>CAV1</i>      | Plasma membrane(GO:0005886)       | Integral to membrane(GO:0016021)  |                                   |
| 15451907 | 07366 | <i>NPEPPS</i>    | Cytoplasm(GO:0005737)             | Nucleus(GO:0005634)               | Mitochondrion(GO:0005739)         |
| 15553127 | 03080 | <i>HK2</i>       | Mitochondrion(GO:0005739)         |                                   |                                   |
| 15718687 | 10941 | <i>RPS3</i>      | Cytoplasm(GO:0005737)             | Ribosome(GO:0005840)              | Nucleus(GO:0005634)               |
| 15811782 | 06737 | <i>GPKOW</i>     | Cytoplasm(GO:0005737)             |                                   |                                   |
| 15987121 | 11103 | <i>RRP12</i>     | Nucleolus(GO:0005730)             | Nucleus(GO:0005634)               |                                   |
| 15991833 | 00809 | <i>HK1</i>       | Cytoplasm(GO:0005737)             | Plasma membrane(GO:0005886)       | Mitochondrion(GO:0005739)         |
| 16117789 | 17996 | <i>RPL34</i>     | Ribosome(GO:0005840)              | Mitochondrion(GO:0005739)         | Nucleolus(GO:0005730)             |
| 16117791 | 01596 | <i>RPL35A</i>    | Ribosome(GO:0005840)              | Nucleolus(GO:0005730)             |                                   |
| 16117796 | 10201 | <i>RPL36</i>     | Ribosome(GO:0005840)              | Nucleolus(GO:0005730)             |                                   |
| 16306548 | 09605 | <i>SARS</i>      | Cytoplasm(GO:0005737)             | Mitochondrion(GO:0005739)         |                                   |
| 16306566 | 11904 | <i>HIST1H2BO</i> | Nucleus(GO:0005634)               | Nucleolus(GO:0005730)             |                                   |
| 16357472 | 00309 | <i>CDC42</i>     | Cytoplasm(GO:0005737)             | Apical membrane(GO:0016327)       | Plasma membrane(GO:0005886)       |
| 16445421 | 06074 | <i>SCAMP3</i>    | Nucleus(GO:0005634)               | Plasma membrane(GO:0005886)       | Cytoplasm(GO:0005737)             |
| 16445424 | 18295 | <i>WDR12</i>     | Nucleolus(GO:0005730)             |                                   |                                   |
| 16507237 | 00682 | <i>HSPA5</i>     | Endoplasmic reticulum(GO:0005783) | Mitochondrion(GO:0005739)         | Cytoplasm(GO:0005737)             |
| 16507952 | 06234 | <i>CARD11</i>    | Plasma membrane(GO:0005886)       | Cytoplasm(GO:0005737)             |                                   |
| 16554604 | 17592 | <i>MRPS23</i>    | Mitochondrion(GO:0005739)         |                                   |                                   |
| 16554609 | 14776 | <i>MRPS11</i>    | Mitochondrion(GO:0005739)         |                                   |                                   |
| 16554629 | 10614 | <i>WDR5</i>      | Cytoplasm(GO:0005737)             | Nucleus(GO:0005634)               | Nucleolus(GO:0005730)             |
| 16579885 | 01607 | <i>RPL4</i>      | Ribosome(GO:0005840)              | Nucleolus(GO:0005730)             |                                   |
| 16753205 | 05440 | <i>UBQLN1</i>    | Cytoplasm(GO:0005737)             | Nucleus(GO:0005634)               | Endoplasmic reticulum(GO:0005783) |
| 16753233 | 01726 | <i>TLN1</i>      | Extracellular(GO:0005576)         | Cytoplasm(GO:0005737)             | Nucleus(GO:0005634)               |
| 16905517 | 05562 | <i>SFRS13A</i>   | Nucleolus(GO:0005730)             | Cytoplasm(GO:0005737)             | Nucleoplasm(GO:0005654)           |
| 16905522 | 04937 | <i>GOSR2</i>     | Golgi apparatus(GO:0005794)       | Endoplasmic reticulum(GO:0005783) |                                   |
| 16933567 | 01296 | <i>RAB8A</i>     | Nucleus(GO:0005634)               | Mitochondrion(GO:0005739)         | Cytoplasm(GO:0005737)             |
| 16950607 | 14769 | <i>MRPL51</i>    | Mitochondrion(GO:0005739)         |                                   |                                   |
| 17017988 | 00467 | <i>COX5B</i>     | Mitochondrion(GO:0005739)         | Nucleus(GO:0005634)               | Cytoplasm(GO:0005737)             |
| 17105394 | 15998 | <i>RPL23A</i>    | Cytoplasm(GO:0005737)             | Mitochondrion(GO:0005739)         | Nucleolus(GO:0005730)             |
| 17136148 | 02184 | <i>ATP6AP1</i>   | -                                 |                                   |                                   |
| 17149828 | 10471 | <i>NARG1</i>     | Cytoplasm(GO:0005737)             | Nucleus(GO:0005634)               |                                   |
| 17158023 | 10765 | <i>C21orf70</i>  | Nucleolus(GO:0005730)             |                                   |                                   |
| 17158044 | 01592 | <i>RPS6</i>      | Ribosome(GO:0005840)              | Cytosol(GO:0005829)               | Nucleolus(GO:0005730)             |
| 17402871 | 16542 | <i>BCCIP</i>     | Nucleus(GO:0005634)               |                                   |                                   |
| 17402893 | 17918 | <i>PSAT1</i>     | Cytosol(GO:0005829)               |                                   |                                   |
| 17402900 | 10349 | <i>FUBP1</i>     | Nucleus(GO:0005634)               | Cytoplasm(GO:0005737)             |                                   |
| 17921987 | 04707 | <i>COX15</i>     | Mitochondrion(GO:0005739)         |                                   |                                   |
| 18093112 | 10732 | <i>ESF1</i>      | Nucleolus(GO:0005730)             | Cytoplasm(GO:0005737)             | Nucleus(GO:0005634)               |

|          |       |                 |                                   |                                   |                             |
|----------|-------|-----------------|-----------------------------------|-----------------------------------|-----------------------------|
| 18104948 | 04700 | <i>RPL21</i>    | Ribosome(GO:0005840)              | Nucleolus(GO:0005730)             |                             |
| 18105007 | 06437 | <i>CAD</i>      | Cytoplasm(GO:0005737)             | Nucleus(GO:0005634)               |                             |
| 18152783 | 11753 | <i>RPL10L</i>   | Ribosome(GO:0005840)              |                                   |                             |
| 18201905 | 01394 | <i>GPI</i>      | Cytoplasm(GO:0005737)             | Mitochondrion(GO:0005739)         |                             |
| 18375505 | 00136 | <i>APEX1</i>    | Cytoplasm(GO:0005737)             | Endoplasmic reticulum(GO:0005783) | Mitochondrion(GO:0005739)   |
| 18375634 | 00808 | <i>BAT3</i>     | Nucleus(GO:0005634)               | Cytosol(GO:0005829)               | Cytoplasm(GO:0005737)       |
| 18375652 | 02513 | <i>PTPN12</i>   | Cytoplasm(GO:0005737)             | Nucleus(GO:0005634)               |                             |
| 18375676 | 10405 | <i>UPF2</i>     | Cytoplasm(GO:0005737)             | Nucleus(GO:0005634)               |                             |
| 18379349 | 05220 | <i>VAT1</i>     | Cytoplasmic vesicle(GO:0016023)   |                                   |                             |
| 18379366 | 07349 | <i>ZMPSTE24</i> | Endoplasmic reticulum(GO:0005783) | Mitochondrion(GO:0005739)         | Golgi apparatus(GO:0005794) |
| 18426915 | 00545 | <i>DBN1</i>     | Cytoplasm(GO:0005737)             |                                   |                             |
| 18497286 | 09918 | <i>DHX36</i>    | Plasma membrane(GO:0005886)       |                                   |                             |
| 18644728 | 14832 | <i>NOL6</i>     | Nucleolus(GO:0005730)             | Nucleus(GO:0005634)               |                             |
| 18644734 | 10850 | <i>CTNBL1</i>   | Nucleus(GO:0005634)               | Nucleolus(GO:0005730)             |                             |
| 18860845 | 05596 | <i>OPA1</i>     | Mitochondrion(GO:0005739)         |                                   |                             |
| 18860916 | 10309 | <i>XRN2</i>     | Cytoplasm(GO:0005737)             | Nucleolus(GO:0005730)             | Nucleus(GO:0005634)         |
| 19224660 | 05937 | <i>PACSN3</i>   | Cytoplasm(GO:0005737)             | Nucleus(GO:0005634)               |                             |
| 19263340 | 06307 | <i>GPT2</i>     | Cytoplasm(GO:0005737)             | Mitochondrion(GO:0005739)         |                             |
| 19557687 | 15948 | <i>SURF2</i>    | Cytoplasm(GO:0005737)             |                                   |                             |
| 19718731 | 10574 | <i>BRD4</i>     | Nucleus(GO:0005634)               | Cytoplasm(GO:0005737)             |                             |
| 19718766 | 03375 | <i>UBE3A</i>    | Cytoplasm(GO:0005737)             | Mitochondrion(GO:0005739)         | Nucleus(GO:0005634)         |
| 19743821 | 00628 | <i>ITGB1</i>    | Plasma membrane(GO:0005886)       | Cell surface(GO:0009986)          |                             |
| 19743875 | 00652 | <i>FH</i>       | Mitochondrion(GO:0005739)         | Cytoplasm(GO:0005737)             |                             |
| 19913363 | 12080 | <i>WHSC2</i>    | Nucleus(GO:0005634)               |                                   |                             |
| 19913369 | 09327 | <i>TBL3</i>     | Nucleolus(GO:0005730)             |                                   |                             |
| 19913406 | 00536 | <i>TOP2A</i>    | Nucleus(GO:0005634)               | Kinetochores(GO:0000776)          | Nucleolus(GO:0005730)       |
| 19913408 | 00537 | <i>TOP2B</i>    | Nucleus(GO:0005634)               | Kinetochores(GO:0000776)          | Cytoplasm(GO:0005737)       |
| 19913416 | 03016 | <i>AP2A1</i>    | Plasma membrane(GO:0005886)       | Mitochondrion(GO:0005739)         |                             |
| 19913418 | 01886 | <i>ATP6V0A1</i> | Brush border(GO:0005903)          | Mitochondrion(GO:0005739)         | Zymogen granule(GO:0042588) |
| 19913424 | 06120 | <i>ATP6V1A</i>  | Endosome(GO:0005768)              | Secretory vesicle(None)           | Plasma membrane(GO:0005886) |
| 19913428 | 06088 | <i>ATP6V1B2</i> | Endosome(GO:0005768)              |                                   |                             |
| 19920317 | 16717 | <i>CKAP4</i>    | Plasma membrane(GO:0005886)       | Cytoplasm(GO:0005737)             | Golgi apparatus(GO:0005794) |
| 19923142 | 04114 | <i>KPNB1</i>    | Cytoplasm(GO:0005737)             | Extracellular(GO:0005576)         | Mitochondrion(GO:0005739)   |
| 19923176 | 04521 | <i>SLC4A7</i>   | Plasma membrane(GO:0005886)       |                                   |                             |
| 19923193 | 08426 | <i>ST13</i>     | Lysosome(GO:0005764)              | Cytoplasm(GO:0005737)             |                             |
| 19923233 | 01700 | <i>SCP2</i>     | Cytoplasm(GO:0005737)             | Microsome(GO:0005792)             | Peroxisome(GO:0005777)      |
| 19923315 | 00717 | <i>SHMT2</i>    | Mitochondrion(GO:0005739)         | Nucleolus(GO:0005730)             |                             |
| 19923362 | 01769 | <i>THY1</i>     | Plasma membrane(GO:0005886)       |                                   |                             |
| 19923416 | 06338 | <i>DIS3</i>     | Nucleus(GO:0005634)               | Nucleolus(GO:0005730)             |                             |
| 19923483 | 06693 | <i>RAB14</i>    | Integral to membrane(GO:0016021)  | Early endosome(GO:0005769)        | Mitochondrion(GO:0005739)   |
| 19923653 | 04688 | <i>PSIP1</i>    | Nucleus(GO:0005634)               | Cytoplasm(GO:0005737)             | Nucleoplasm(GO:0005654)     |



|          |       |                 |                                   |                                |                                     |
|----------|-------|-----------------|-----------------------------------|--------------------------------|-------------------------------------|
| 19923784 | 02737 | <i>SUB1</i>     | Nucleus(GO:0005634)               | Nucleolus(GO:0005730)          | Mitochondrion(GO:0005739)           |
| 19923790 | 11471 | <i>RAB3GAP2</i> | Cytoplasmic vesicle(GO:0016023)   | Mitochondrion(GO:0005739)      | Microsome(GO:0005792)               |
| 19923830 | 17823 | <i>PBXIP1</i>   | Cytoplasm(GO:0005737)             | Nucleus(GO:0005634)            |                                     |
| 20070125 | 07181 | <i>P4HB</i>     | Endoplasmic reticulum(GO:0005783) | Mitochondrion(GO:0005739)      | Extracellular(GO:0005576)           |
| 20070141 | 03857 | <i>PLD2</i>     | Plasma membrane(GO:0005886)       | Golgi apparatus(GO:0005794)    | Nucleus(GO:0005634)                 |
| 20070160 | 10347 | <i>CSDA</i>     | Nucleus(GO:0005634)               | Cytoplasm(GO:0005737)          |                                     |
| 20070197 | 03728 | <i>DDOST</i>    | Endoplasmic reticulum(GO:0005783) | Mitochondrion(GO:0005739)      |                                     |
| 20070220 | 04955 | <i>PRMT5</i>    | Cytoplasm(GO:0005737)             |                                |                                     |
| 20070228 | 03205 | <i>NUCB1</i>    | Golgi apparatus(GO:0005794)       | Cytoplasm(GO:0005737)          | Nucleus(GO:0005634)                 |
| 20070384 | 14681 | <i>PGAM5</i>    | Cytosol(GO:0005829)               |                                |                                     |
| 20127408 | 02934 | <i>HADHA</i>    | Mitochondrion(GO:0005739)         | Nucleus(GO:0005634)            |                                     |
| 20127448 | 10160 | <i>POLA2</i>    | Nucleus(GO:0005634)               |                                |                                     |
| 20127454 | 03434 | <i>ATIC</i>     | -                                 |                                |                                     |
| 20127486 | 04080 | <i>M6PRBP1</i>  | Cytoplasm(GO:0005737)             | Extracellular(GO:0005576)      | Endosome(GO:0005768)                |
| 20127499 | 09054 | <i>SFRS6</i>    | Nucleus(GO:0005634)               | Cytoplasm(GO:0005737)          | Nucleolus(GO:0005730)               |
| 20149524 | 03655 | <i>SUPT5H</i>   | Nucleus(GO:0005634)               |                                |                                     |
| 20149568 | 01191 | <i>NDUFV1</i>   | Mitochondrion(GO:0005739)         |                                |                                     |
| 20149592 | 05816 | <i>STRAP</i>    | Cytoplasm(GO:0005737)             | Nucleus(GO:0005634)            |                                     |
| 20149594 | 06763 | <i>HSP90AB1</i> | Cytoplasm(GO:0005737)             | Mitochondrion(GO:0005739)      | Nucleolus(GO:0005730)               |
| 20149629 | 10863 | <i>DDX47</i>    | Nucleus(GO:0005634)               | Nucleolus(GO:0005730)          | Cytoplasm(GO:0005737)               |
| 20149709 | 13667 | <i>HNRPLL</i>   | Nucleolus(GO:0005730)             |                                |                                     |
| 20336294 | 13142 | <i>DHX30</i>    | Nucleus(GO:0005634)               | Mitochondrion(GO:0005739)      |                                     |
| 20357529 | 11820 | <i>GNB2</i>     | Cytoplasm(GO:0005737)             |                                |                                     |
| 20357556 | 01268 | <i>CTTN</i>     | Cytoplasm(GO:0005737)             | Plasma membrane(GO:0005886)    | Clathrin-coated vesicle(GO:0030136) |
| 20357568 | 09675 | <i>AASDHPPT</i> | Cytoplasm(GO:0005737)             |                                |                                     |
| 20806097 | 12562 | <i>NOC3L</i>    | -                                 |                                |                                     |
| 21040277 | 17324 | <i>DAGLB</i>    | -                                 |                                |                                     |
| 21040371 | 10861 | <i>DDX39</i>    | Nucleus(GO:0005634)               | Nucleolus(GO:0005730)          |                                     |
| 21071054 | 04461 | <i>HLTF</i>     | Nucleus(GO:0005634)               | Cytoplasm(GO:0005737)          | Nucleolus(GO:0005730)               |
| 21071056 | 04459 | <i>SMARCA4</i>  | Nucleus(GO:0005634)               | Kinetochore(GO:0000776)        | Nucleolus(GO:0005730)               |
| 21071058 | 04538 | <i>SMARCA5</i>  | Nucleus(GO:0005634)               | Nucleolus(GO:0005730)          |                                     |
| 21237802 | 03435 | <i>SMARCC1</i>  | Nucleus(GO:0005634)               | Cytoplasm(GO:0005737)          | Kinetochore(GO:0000776)             |
| 21264341 | 02115 | <i>SMS</i>      | -                                 |                                |                                     |
| 21264343 | 04205 | <i>SAFB</i>     | Nucleus(GO:0005634)               | Cytoplasm(GO:0005737)          |                                     |
| 21264355 | 04382 | <i>SMARCE1</i>  | Nucleus(GO:0005634)               | Kinetochore(GO:0000776)        |                                     |
| 21281677 | 10305 | <i>WDR36</i>    | Nucleolus(GO:0005730)             |                                |                                     |
| 21314753 | 17576 | <i>MKI67IP</i>  | Nucleolus(GO:0005730)             | Nucleus(GO:0005634)            | Cytoplasm(GO:0005737)               |
| 21327715 | 10393 | <i>TCERG1</i>   | Nucleus(GO:0005634)               | Nucleolus(GO:0005730)          |                                     |
| 21359860 | 01778 | <i>PTMA</i>     | Nucleus(GO:0005634)               | Perinuclear region(GO:0048471) | Cytoplasm(GO:0005737)               |
| 21359867 | 00480 | <i>CYC1</i>     | Mitochondrion(GO:0005739)         |                                |                                     |
| 21359941 | 05641 | <i>ELAC2</i>    | Nucleus(GO:0005634)               | Cytoplasm(GO:0005737)          |                                     |

|          |       |                 |                                   |                                   |                                   |
|----------|-------|-----------------|-----------------------------------|-----------------------------------|-----------------------------------|
| 21359945 | 12097 | <i>NCAPG</i>    | Nucleus(GO:0005634)               | Cytoplasm(GO:0005737)             |                                   |
| 21359965 | 07480 | <i>CLPTM1L</i>  | Integral to membrane(GO:0016021)  | Mitochondrion(GO:0005739)         |                                   |
| 21361091 | 01877 | <i>UCHL1</i>    | Cytoplasm(GO:0005737)             |                                   |                                   |
| 21361144 | 01733 | <i>PSMC3</i>    | Nucleus(GO:0005634)               |                                   |                                   |
| 21361181 | 01662 | <i>ATP1A1</i>   | Plasma membrane(GO:0005886)       | Mitochondrion(GO:0005739)         |                                   |
| 21361282 | 09052 | <i>SFRS4</i>    | Nucleus(GO:0005634)               |                                   |                                   |
| 21361348 | 06712 | <i>UTP14A</i>   | Ribosome(GO:0005840)              |                                   |                                   |
| 21361370 | 00720 | <i>PYGB</i>     | Cytoplasm(GO:0005737)             | Nucleus(GO:0005634)               |                                   |
| 21361397 | 05402 | <i>RACGAP1</i>  | Nucleus(GO:0005634)               | Microtubule(GO:0005874)           |                                   |
| 21361399 | 16184 | <i>PPP2R1A</i>  | Cytoplasm(GO:0005737)             | Membrane fraction(GO:0005624)     | Microtubule(GO:0005874)           |
| 21361416 | 02518 | <i>RRAS2</i>    | Plasma membrane(GO:0005886)       | Endoplasmic reticulum(GO:0005783) | Nucleus(GO:0005634)               |
| 21361452 | 00700 | <i>GLS</i>      | Mitochondrion(GO:0005739)         | Golgi apparatus(GO:0005794)       |                                   |
| 21361454 | 17939 | <i>PYCR2</i>    | Mitochondrion(GO:0005739)         |                                   |                                   |
| 21361462 | 10434 | <i>EHD2</i>     | Cytoplasm(GO:0005737)             | Plasma membrane(GO:0005886)       | Nucleus(GO:0005634)               |
| 21361551 | 02728 | <i>SLC4A2</i>   | Plasma membrane(GO:0005886)       | Nucleus(GO:0005634)               | Cytoplasm(GO:0005737)             |
| 21361559 | 02890 | <i>VSNL1</i>    | Plasma membrane(GO:0005886)       | Cytoplasm(GO:0005737)             |                                   |
| 21361565 | 04467 | <i>ATP5F1</i>   | Mitochondrion(GO:0005739)         |                                   |                                   |
| 21361598 | 09509 | <i>MPP6</i>     | Plasma membrane(GO:0005886)       |                                   |                                   |
| 21361621 | 01389 | <i>PGM1</i>     | Cytoplasm(GO:0005737)             | Nucleus(GO:0005634)               |                                   |
| 21361633 | 08622 | <i>LRRC40</i>   | -                                 |                                   |                                   |
| 21361647 | 07613 | <i>AHCYL1</i>   | Cytoplasm(GO:0005737)             | Plasma membrane(GO:0005886)       | Endoplasmic reticulum(GO:0005783) |
| 21361657 | 03625 | <i>PDIA3</i>    | Endoplasmic reticulum(GO:0005783) | Plasma membrane(GO:0005886)       | Mitochondrion(GO:0005739)         |
| 21361659 | 17154 | <i>IPO9</i>     | Cytoplasm(GO:0005737)             |                                   |                                   |
| 21361745 | 10257 | <i>STRBP</i>    | Nucleus(GO:0005634)               |                                   |                                   |
| 21361787 | 15582 | <i>TTC17</i>    | -                                 |                                   |                                   |
| 21361794 | 06983 | <i>CAND1</i>    | Nucleus(GO:0005634)               | Mitochondrion(GO:0005739)         |                                   |
| 21361822 | 09452 | <i>NDUFA13</i>  | Mitochondrion(GO:0005739)         | Perinuclear region(GO:0048471)    | Cytoplasm(GO:0005737)             |
| 21361895 | 09522 | <i>FKBP10</i>   | Endoplasmic reticulum(GO:0005783) |                                   |                                   |
| 21389315 | 01832 | <i>SLC25A1</i>  | Mitochondrion(GO:0005739)         |                                   |                                   |
| 21396480 | 11480 | <i>RALY</i>     | Cytoplasm(GO:0005737)             | Mitochondrion(GO:0005739)         | Nucleus(GO:0005634)               |
| 21396489 | 05689 | <i>LONP1</i>    | Mitochondrion(GO:0005739)         | Endoplasmic reticulum(GO:0005783) |                                   |
| 21450802 | 08318 | <i>UBLCP1</i>   | Nucleus(GO:0005634)               |                                   |                                   |
| 21464101 | 05639 | <i>YWHAG</i>    | Cytoplasm(GO:0005737)             | Golgi apparatus(GO:0005794)       | Nucleus(GO:0005634)               |
| 21493022 | 05263 | <i>AKAP12</i>   | Nucleus(GO:0005634)               | Cytoplasm(GO:0005737)             | Plasma membrane(GO:0005886)       |
| 21493024 | 05263 | <i>AKAP12</i>   | Nucleus(GO:0005634)               | Cytoplasm(GO:0005737)             | Plasma membrane(GO:0005886)       |
| 21536286 | 00423 | <i>CKB</i>      | Cytoplasm(GO:0005737)             |                                   |                                   |
| 21536326 | 10428 | <i>HNRNPUL1</i> | Nucleus(GO:0005634)               | Cytoplasm(GO:0005737)             |                                   |
| 21536452 | 06685 | <i>PRSS3</i>    | -                                 |                                   |                                   |
| 21614499 | 00475 | <i>EZR</i>      | Cytoplasm(GO:0005737)             | Mitochondrion(GO:0005739)         | Plasma membrane(GO:0005886)       |
| 21614525 | 02160 | <i>GPC4</i>     | Plasma membrane(GO:0005886)       |                                   |                                   |
| 21700763 | 12674 | <i>HN1L</i>     | Nucleus(GO:0005634)               | Cytoplasm(GO:0005737)             |                                   |

|          |       |                 |                                   |                                   |                                |
|----------|-------|-----------------|-----------------------------------|-----------------------------------|--------------------------------|
| 21703346 | 06170 | <i>SPG20</i>    | Cytoplasm(GO:0005737)             | Microtubule(GO:0005874)           | Mitochondrion(GO:0005739)      |
| 21735621 | 01099 | <i>MDH2</i>     | Mitochondrion(GO:0005739)         | Extracellular(GO:0005576)         | Nucleolus(GO:0005730)          |
| 21914927 | 07232 | <i>HELLS</i>    | Nucleus(GO:0005634)               |                                   |                                |
| 22001417 | 06109 | <i>GEMIN5</i>   | Cytoplasm(GO:0005737)             | Nucleus(GO:0005634)               |                                |
| 22027538 | 06425 | <i>PDCD6IP</i>  | Cytoplasm(GO:0005737)             | Cytoskeleton(GO:0005856)          | Perinuclear region(GO:0048471) |
| 22035581 | 06716 | <i>SEPT6</i>    | Cytoplasmic vesicle(GO:0016023)   |                                   |                                |
| 22035590 | 14749 | <i>MRPL24</i>   | Mitochondrion(GO:0005739)         |                                   |                                |
| 22094121 | 11537 | <i>PDS5A</i>    | Nucleus(GO:0005634)               | Mitochondrion(GO:0005739)         |                                |
| 22095331 | 08306 | <i>KIAA0090</i> | Mitochondrion(GO:0005739)         |                                   |                                |
| 22095351 | 05846 | <i>XPO7</i>     | Nucleus(GO:0005634)               | Cytoplasm(GO:0005737)             |                                |
| 22129784 | 13675 | <i>C17orf79</i> | -                                 |                                   |                                |
| 22208977 | 02829 | <i>HMGA1</i>    | Nucleus(GO:0005634)               | Cytoplasm(GO:0005737)             |                                |
| 22538467 | 03710 | <i>PSMB4</i>    | Cytoplasm(GO:0005737)             |                                   |                                |
| 22547138 | 14759 | <i>MRPL4</i>    | Mitochondrion(GO:0005739)         |                                   |                                |
| 22547215 | 08472 | <i>PPIL2</i>    | Nucleus(GO:0005634)               | Plasma membrane(GO:0005886)       | Cytoplasm(GO:0005737)          |
| 22748937 | 06385 | <i>XPO5</i>     | Nucleus(GO:0005634)               |                                   |                                |
| 22749415 | 03086 | <i>STT3A</i>    | Plasma membrane(GO:0005886)       |                                   |                                |
| 22907052 | 07252 | <i>ARPC1A</i>   | Cytoplasm(GO:0005737)             | Nucleolus(GO:0005730)             |                                |
| 23097240 | 10904 | <i>LRWD1</i>    | Nucleus(GO:0005634)               |                                   |                                |
| 23110925 | 02630 | <i>PSMB6</i>    | Cytoplasm(GO:0005737)             |                                   |                                |
| 23110935 | 04170 | <i>PSMA1</i>    | Cytoplasm(GO:0005737)             | Nucleus(GO:0005634)               |                                |
| 23110942 | 01464 | <i>PSMA5</i>    | Cytoplasm(GO:0005737)             | Nucleus(GO:0005634)               |                                |
| 23110944 | 04171 | <i>PSMA6</i>    | Cytoplasm(GO:0005737)             | Ribosome(GO:0005840)              | Nucleus(GO:0005634)            |
| 23111038 | 09332 | <i>SNX2</i>     | Endosome(GO:0005768)              | Cytoplasm(GO:0005737)             | Plasma membrane(GO:0005886)    |
| 23111062 | 09055 | <i>SFRS8</i>    | Nucleus(GO:0005634)               |                                   |                                |
| 23308572 | 06925 | <i>MBOAT7</i>   | Plasma membrane(GO:0005886)       | Integral to membrane(GO:0016021)  |                                |
| 23308577 | 06047 | <i>PHGDH</i>    | Extracellular(GO:0005576)         | Cytosol(GO:0005829)               |                                |
| 23308579 | 06138 | <i>PTGES3</i>   | Cytoplasm(GO:0005737)             | Nucleus(GO:0005634)               |                                |
| 23308689 | 12668 | <i>RPUSD2</i>   | -                                 |                                   |                                |
| 23308751 | 12238 | <i>HIBADH</i>   | Mitochondrion(GO:0005739)         |                                   |                                |
| 23397427 | 06734 | <i>SYNCRIP</i>  | Cytoplasm(GO:0005737)             | Endoplasmic reticulum(GO:0005783) | Ribosome(GO:0005840)           |
| 23397429 | 09969 | <i>EIF3M</i>    | -                                 |                                   |                                |
| 23397653 | 15136 | <i>PIGT</i>     | Endoplasmic reticulum(GO:0005783) |                                   |                                |
| 23397666 | 09690 | <i>SIN3A</i>    | Nucleus(GO:0005634)               | Cytoplasm(GO:0005737)             |                                |
| 23503295 | 00278 | <i>CSNK2B</i>   | Nucleus(GO:0005634)               | Cytoplasm(GO:0005737)             |                                |
| 23510340 | 02440 | <i>UBA1</i>     | Nucleus(GO:0005634)               | Cytosol(GO:0005829)               | Cytoplasm(GO:0005737)          |
| 23510381 | 04210 | <i>TNPO1</i>    | Cytoplasm(GO:0005737)             | Centrosome(GO:0005813)            | Nuclear membrane(GO:0005635)   |
| 23510448 | 04075 | <i>MCM5</i>     | Nucleus(GO:0005634)               | Chromosome(GO:0005694)            | Mitochondrion(GO:0005739)      |
| 23510451 | 00034 | <i>APEH</i>     | Cytoplasm(GO:0005737)             |                                   |                                |
| 23510462 | 06212 | <i>RBM12</i>    | Mitochondrion(GO:0005739)         | Cytoplasm(GO:0005737)             | Nucleus(GO:0005634)            |
| 24119203 | 01840 | <i>TPM3</i>     | Cytoplasm(GO:0005737)             | Cytosol(GO:0005829)               | Extracellular(GO:0005576)      |

|          |       |                  |                                   |                                            |                                   |
|----------|-------|------------------|-----------------------------------|--------------------------------------------|-----------------------------------|
| 24233517 | 08092 | <i>IKBIP</i>     | Endoplasmic reticulum(GO:0005783) |                                            |                                   |
| 24234683 | 02081 | <i>USP11</i>     | Nucleus(GO:0005634)               |                                            |                                   |
| 24234688 | 02770 | <i>HSPA9</i>     | Mitochondrion(GO:0005739)         | Nucleolus(GO:0005730)                      | Endoplasmic reticulum(GO:0005783) |
| 24234699 | 01007 | <i>KRT19</i>     | Cytoplasm(GO:0005737)             |                                            |                                   |
| 24234747 | 04419 | <i>ILF2</i>      | Nucleus(GO:0005634)               | Nucleolus(GO:0005730)                      | Cytoplasm(GO:0005737)             |
| 24234750 | 04420 | <i>ILF3</i>      | Nucleus(GO:0005634)               | Ribosome(GO:0005840)                       | Nucleolus(GO:0005730)             |
| 24234756 | 04420 | <i>ILF3</i>      | Nucleus(GO:0005634)               | Ribosome(GO:0005840)                       | Nucleolus(GO:0005730)             |
| 24307879 | 04512 | <i>DYNC1I2</i>   | Cytoplasm(GO:0005737)             |                                            |                                   |
| 24307899 | 08466 | <i>ERAL1</i>     | Endoplasmic reticulum(GO:0005783) | Nucleus(GO:0005634)                        |                                   |
| 24307939 | 06468 | <i>CCT5</i>      | Centrosome(GO:0005813)            | Cytoplasm(GO:0005737)                      |                                   |
| 24307961 | 13799 | <i>KIAA0406</i>  | Cytoplasm(GO:0005737)             |                                            |                                   |
| 24307969 | 05890 | <i>CYFIP1</i>    | Cytoplasm(GO:0005737)             | Nucleus(GO:0005634)                        |                                   |
| 24308007 | 09641 | <i>ARL6IP1</i>   | Plasma membrane(GO:0005886)       | Cytoplasm(GO:0005737)                      |                                   |
| 24308009 | 10071 | <i>METAP1</i>    | Nucleolus(GO:0005730)             |                                            |                                   |
| 24308013 | 07500 | <i>PMPCA</i>     | Mitochondrion(GO:0005739)         |                                            |                                   |
| 24308043 | 11113 | <i>AHCYL2</i>    | -                                 |                                            |                                   |
| 24308127 | 09722 | <i>DNAJC10</i>   | Endoplasmic reticulum(GO:0005783) |                                            |                                   |
| 24308133 | 14243 | <i>TMCO1</i>     | Endoplasmic reticulum(GO:0005783) | Cytosol(GO:0005829)                        | Golgi apparatus(GO:0005794)       |
| 24308207 | 13837 | <i>LRRC47</i>    | Cytoplasm(GO:0005737)             |                                            |                                   |
| 24308295 | 07550 | <i>GRPEL1</i>    | Mitochondrion(GO:0005739)         |                                            |                                   |
| 24308324 | 14724 | <i>FAR1</i>      | -                                 |                                            |                                   |
| 24308370 | 08097 | <i>NUDT16</i>    | -                                 |                                            |                                   |
| 24308400 | 10696 | <i>CCDC109A</i>  | -                                 |                                            |                                   |
| 24415383 | 10144 | <i>PELP1</i>     | Nucleus(GO:0005634)               | Nucleolus(GO:0005730)                      |                                   |
| 24415404 | 10069 | <i>MDN1</i>      | Nucleus(GO:0005634)               | Nucleolus(GO:0005730)                      |                                   |
| 24430137 | 02087 | <i>LAGE3</i>     | -                                 |                                            |                                   |
| 24430151 | 04084 | <i>PSMC1</i>     | Cytoplasm(GO:0005737)             | Nucleus(GO:0005634)                        |                                   |
| 24430160 | 04086 | <i>PSMC6</i>     | Cytoplasm(GO:0005737)             |                                            |                                   |
| 24431935 | 07259 | <i>RTN4</i>      | Nucleus(GO:0005634)               | Endoplasmic reticulum membrane(GO:0005789) | Cytoplasm(GO:0005737)             |
| 24475816 | 17076 | <i>TECR</i>      | Endoplasmic reticulum(GO:0005783) | Mitochondrion(GO:0005739)                  |                                   |
| 24497435 | 03400 | <i>PSMC5</i>     | Cytoplasm(GO:0005737)             | Nucleus(GO:0005634)                        |                                   |
| 24497451 | 05226 | <i>NUP50</i>     | Nucleoplasm(GO:0005654)           | Nucleus(GO:0005634)                        | Cytoplasm(GO:0005737)             |
| 24638446 | 09107 | <i>HIST2H2AC</i> | Nucleus(GO:0005634)               |                                            |                                   |
| 24638454 | 00161 | <i>ATP2A2</i>    | Nucleus(GO:0005634)               | Endoplasmic reticulum(GO:0005783)          | Mitochondrion(GO:0005739)         |
| 24762236 | 10972 | <i>PRPF38A</i>   | -                                 |                                            |                                   |
| 24797086 | 03597 | <i>IPO5</i>      | Cytoplasm(GO:0005737)             | Mitochondrion(GO:0005739)                  | Centrosome(GO:0005813)            |
| 24797097 | 01528 | <i>PYCR1</i>     | Cytoplasm(GO:0005737)             | Nucleus(GO:0005634)                        | Microsome(GO:0005792)             |
| 24797106 | 16870 | <i>FAF2</i>      | Cytoplasm(GO:0005737)             |                                            |                                   |
| 24797148 | 02944 | <i>SEPHS1</i>    | -                                 |                                            |                                   |
| 25188179 | 06750 | <i>VDAC3</i>     | Mitochondrion(GO:0005739)         |                                            |                                   |
| 25453474 | 00560 | <i>EEF1D</i>     | Endoplasmic reticulum(GO:0005783) | Nucleus(GO:0005634)                        | Cytoplasm(GO:0005737)             |

|          |       |                  |                             |                                   |                             |
|----------|-------|------------------|-----------------------------|-----------------------------------|-----------------------------|
| 25470886 | 08462 | <i>DAZAP1</i>    | Nucleus(GO:0005634)         | Cytoplasm(GO:0005737)             |                             |
| 25470890 | 08462 | <i>DAZAP1</i>    | Nucleus(GO:0005634)         | Cytoplasm(GO:0005737)             |                             |
| 25777600 | 10169 | <i>PSMD1</i>     | Cytoplasm(GO:0005737)       | Nucleus(GO:0005634)               | Cytosol(GO:0005829)         |
| 25777602 | 05870 | <i>PSMD2</i>     | Cytoplasm(GO:0005737)       | Cytosol(GO:0005829)               |                             |
| 25777612 | 10170 | <i>PSMD3</i>     | Cytoplasm(GO:0005737)       | Peroxisome(GO:0005777)            |                             |
| 25777615 | 01147 | <i>PSMD7</i>     | Nucleus(GO:0005634)         |                                   |                             |
| 25777730 | 00005 | <i>ALDH1B1</i>   | Mitochondrion(GO:0005739)   |                                   |                             |
| 26051231 | 07466 | <i>LACTB</i>     | Mitochondrion(GO:0005739)   | Nucleus(GO:0005634)               | Ribosome(GO:0005840)        |
| 26051235 | 06354 | <i>NUP133</i>    | Nucleus(GO:0005634)         | Kinetochores(GO:0000776)          | Microtubule(GO:0005874)     |
| 26051237 | 06352 | <i>NUP54</i>     | Nucleus(GO:0005634)         | Nuclear membrane(GO:0005635)      | Cytoplasm(GO:0005737)       |
| 26080431 | 07792 | <i>ATAD5</i>     | -                           |                                   |                             |
| 27262628 | 04423 | <i>NASP</i>      | Nucleus(GO:0005634)         | Golgi apparatus(GO:0005794)       | Cytoplasm(GO:0005737)       |
| 27262634 | 04423 | <i>NASP</i>      | Nucleus(GO:0005634)         | Golgi apparatus(GO:0005794)       | Cytoplasm(GO:0005737)       |
| 27262645 | 06394 | <i>ATXN2L</i>    | Nucleus(GO:0005634)         | Cytoplasm(GO:0005737)             | Cytosol(GO:0005829)         |
| 27262649 | 06394 | <i>ATXN2L</i>    | Nucleus(GO:0005634)         | Cytoplasm(GO:0005737)             | Cytosol(GO:0005829)         |
| 27436881 | 03526 | <i>LEFTY2</i>    | Extracellular(GO:0005576)   |                                   |                             |
| 27436948 | 01035 | <i>LMNA</i>      | Nucleus(GO:0005634)         | Nucleolus(GO:0005730)             | Cytoplasm(GO:0005737)       |
| 27436951 | 01037 | <i>LMNB2</i>     | Nucleus(GO:0005634)         | Cytoplasm(GO:0005737)             |                             |
| 27477041 | 06256 | <i>AP2A2</i>     | Plasma membrane(GO:0005886) |                                   |                             |
| 27477134 | 06368 | <i>NUP210</i>    | Nucleus(GO:0005634)         | Nuclear membrane(GO:0005635)      | Mitochondrion(GO:0005739)   |
| 27481323 | 19281 | <i>LOC284672</i> | -                           |                                   |                             |
| 27881506 | 12403 | <i>ABCF2</i>     | Mitochondrion(GO:0005739)   | Peroxisome(GO:0005777)            |                             |
| 27883866 | 12373 | <i>RIC8A</i>     | Cytoplasm(GO:0005737)       | Plasma membrane(GO:0005886)       |                             |
| 28173554 | 13661 | <i>HIST3H2BB</i> | Nucleus(GO:0005634)         |                                   |                             |
| 28178821 | 05163 | <i>IDH3B</i>     | Mitochondrion(GO:0005739)   |                                   |                             |
| 28178825 | 00984 | <i>IDH1</i>      | Cytoplasm(GO:0005737)       | Mitochondrion(GO:0005739)         | Peroxisome(GO:0005777)      |
| 28178832 | 00973 | <i>IDH2</i>      | Mitochondrion(GO:0005739)   |                                   |                             |
| 28372531 | 11453 | <i>PPP4R2</i>    | Centrosome(GO:0005813)      | Cytoplasm(GO:0005737)             | Nucleus(GO:0005634)         |
| 28373194 | 06440 | <i>ADRM1</i>     | Microsome(GO:0005792)       | Cytoplasm(GO:0005737)             | Plasma membrane(GO:0005886) |
| 28395033 | 01322 | <i>RHOC</i>      | Cytoplasm(GO:0005737)       | Plasma membrane(GO:0005886)       |                             |
| 28416946 | 10106 | <i>MYO18A</i>    | Nucleus(GO:0005634)         | Endoplasmic reticulum(GO:0005783) | Cytoplasm(GO:0005737)       |
| 28460688 | 09408 | <i>TXLNA</i>     | Cytoplasm(GO:0005737)       | Nucleus(GO:0005634)               | Plasma membrane(GO:0005886) |
| 28557798 | 11403 | <i>FAM84B</i>    | Plasma membrane(GO:0005886) |                                   |                             |
| 28559069 | 04141 | <i>DNMT3A</i>    | Nucleus(GO:0005634)         | Cytoplasm(GO:0005737)             |                             |
| 28559085 | 02305 | <i>CTPS2</i>     | -                           |                                   |                             |
| 28626498 | 18798 | <i>KIFC1</i>     | Microtubule(GO:0005874)     |                                   |                             |
| 28626510 | 17962 | <i>RCN3</i>      | -                           |                                   |                             |
| 28827795 | 16642 | <i>CHMP4B</i>    | Cytoplasm(GO:0005737)       |                                   |                             |
| 28872725 | 05119 | <i>PSMD11</i>    | Cytoplasm(GO:0005737)       | Nucleus(GO:0005634)               |                             |
| 28872728 | 04595 | <i>PSMD13</i>    | Cytoplasm(GO:0005737)       |                                   |                             |
| 28872736 | 14762 | <i>MRPL43</i>    | Mitochondrion(GO:0005739)   |                                   |                             |

|          |       |                 |                                   |                                   |                                 |
|----------|-------|-----------------|-----------------------------------|-----------------------------------|---------------------------------|
| 28872782 | 12189 | <i>CDK5RAP1</i> | -                                 |                                   |                                 |
| 29029559 | 03217 | <i>CSE1L</i>    | Nucleus(GO:0005634)               | Extracellular(GO:0005576)         | Mitochondrion(GO:0005739)       |
| 29557939 | 16199 | <i>PPM1A</i>    | Cytoplasm(GO:0005737)             | Nucleus(GO:0005634)               |                                 |
| 29568099 | 09425 | <i>NSFL1C</i>   | Nucleus(GO:0005634)               | Golgi apparatus(GO:0005794)       | Cytoplasm(GO:0005737)           |
| 29568103 | 01617 | <i>SNRNP70</i>  | Nucleus(GO:0005634)               | Cytoplasm(GO:0005737)             |                                 |
| 29568111 | 17619 | <i>MYL9</i>     | -                                 |                                   |                                 |
| 29570798 | 01402 | <i>PPAT</i>     | Nucleus(GO:0005634)               |                                   |                                 |
| 29788751 | 07237 | <i>DGKH</i>     | Cytoplasm(GO:0005737)             | Endosome(GO:0005768)              | Cytoplasmic vesicle(GO:0016023) |
| 29788768 | 14707 | <i>TUBB2B</i>   | -                                 |                                   |                                 |
| 29788785 | 01852 | <i>TUBB</i>     | Cytoplasm(GO:0005737)             | Plasma membrane(GO:0005886)       | Kinetochores(GO:0000776)        |
| 29789006 | 06374 | <i>FERMT2</i>   | Cytoplasm(GO:0005737)             | Plasma membrane(GO:0005886)       | Nucleus(GO:0005634)             |
| 29789090 | 18171 | <i>RCC2</i>     | Nucleus(GO:0005634)               | Mitochondrion(GO:0005739)         | Cytoplasm(GO:0005737)           |
| 29826287 | 14766 | <i>MRPL47</i>   | Mitochondrion(GO:0005739)         |                                   |                                 |
| 29826294 | 08303 | <i>GORASP2</i>  | Golgi apparatus(GO:0005794)       | Cytoplasm(GO:0005737)             | Nucleus(GO:0005634)             |
| 29826321 | 00036 | <i>ADD1</i>     | Nucleus(GO:0005634)               | Cytoplasm(GO:0005737)             | Mitochondrion(GO:0005739)       |
| 29826325 | 00036 | <i>ADD1</i>     | Nucleus(GO:0005634)               | Cytoplasm(GO:0005737)             | Mitochondrion(GO:0005739)       |
| 29826335 | 04882 | <i>EIF2S2</i>   | Cytoplasm(GO:0005737)             | Nucleolus(GO:0005730)             |                                 |
| 30039710 | 09526 | <i>PTF1A</i>    | Nucleus(GO:0005634)               | Cytoplasm(GO:0005737)             |                                 |
| 30065645 | 02858 | <i>PPP2R4</i>   | Cytoplasm(GO:0005737)             | Nucleus(GO:0005634)               |                                 |
| 30065649 | 02858 | <i>PPP2R4</i>   | Cytoplasm(GO:0005737)             | Nucleus(GO:0005634)               |                                 |
| 30089937 | 11034 | <i>TMEM132A</i> | Endoplasmic reticulum(GO:0005783) | Golgi apparatus(GO:0005794)       |                                 |
| 30410796 | 05500 | <i>PSME3</i>    | Cytoplasm(GO:0005737)             | Nucleus(GO:0005634)               |                                 |
| 30581135 | 02077 | <i>SMC1A</i>    | Nucleus(GO:0005634)               | Chromosome(GO:0005694)            | Cytoplasm(GO:0005737)           |
| 30795212 | 16306 | <i>IGF2BP3</i>  | Cytoplasm(GO:0005737)             | Nucleus(GO:0005634)               |                                 |
| 30795231 | 08389 | <i>BASP1</i>    | Nucleus(GO:0005634)               | Cytoplasm(GO:0005737)             | Plasma membrane(GO:0005886)     |
| 31044432 | 13984 | <i>LEMD2</i>    | Integral to membrane(GO:0016021)  | Nucleus(GO:0005634)               |                                 |
| 31377595 | 11232 | <i>ZC3H18</i>   | -                                 |                                   |                                 |
| 31377697 | 07986 | <i>GLT25D1</i>  | -                                 |                                   |                                 |
| 31377744 | 07903 | <i>HEATR2</i>   | -                                 |                                   |                                 |
| 31377800 | 15964 | <i>TROVE2</i>   | Cytoplasm(GO:0005737)             | Nucleolus(GO:0005730)             | Plasma membrane(GO:0005886)     |
| 31542301 | 10826 | <i>SAMM50</i>   | Mitochondrion(GO:0005739)         |                                   |                                 |
| 31542319 | 06089 | <i>COPE</i>     | Cytoplasm(GO:0005737)             | Endoplasmic reticulum(GO:0005783) | Golgi apparatus(GO:0005794)     |
| 31542509 | 12429 | <i>ADPGK</i>    | -                                 |                                   |                                 |
| 31542656 | 10864 | <i>DDX49</i>    | Nucleus(GO:0005634)               | Nucleolus(GO:0005730)             |                                 |
| 31542663 | 07708 | <i>L1TD1</i>    | -                                 |                                   |                                 |
| 31542860 | 08845 | <i>GRP</i>      | Extracellular(GO:0005576)         |                                   |                                 |
| 31543191 | 12580 | <i>C10orf58</i> | -                                 |                                   |                                 |
| 31543207 | 17579 | <i>MMS19</i>    | Nucleus(GO:0005634)               |                                   |                                 |
| 31543380 | 03961 | <i>PARK7</i>    | Cytoplasm(GO:0005737)             | Mitochondrion(GO:0005739)         | Extracellular(GO:0005576)       |
| 31563503 | 09793 | <i>ADNP</i>     | Nucleus(GO:0005634)               | Cytoplasm(GO:0005737)             |                                 |
| 31563531 | 05077 | <i>STAG2</i>    | Nucleus(GO:0005634)               | Cytoplasm(GO:0005737)             | Chromosome(GO:0005694)          |

|          |       |                 |                                    |                                   |                             |
|----------|-------|-----------------|------------------------------------|-----------------------------------|-----------------------------|
| 31563537 | 09322 | <i>CLASP1</i>   | Centrosome(GO:0005813)             | Cytoplasm(GO:0005737)             | Microtubule(GO:0005874)     |
| 31621305 | 06343 | <i>LRPPRC</i>   | Nucleus(GO:0005634)                | Plasma membrane(GO:0005886)       | Cytoplasm(GO:0005737)       |
| 31652262 | 12803 | <i>EMG1</i>     | Nucleus(GO:0005634)                | Nucleolus(GO:0005730)             |                             |
| 31657129 | 09072 | <i>PFAS</i>     | Cytoplasm(GO:0005737)              |                                   |                             |
| 31657144 | 08856 | <i>ITPA</i>     | Cytoplasm(GO:0005737)              |                                   |                             |
| 31711992 | 10578 | <i>DLAT</i>     | Mitochondrion(GO:0005739)          |                                   |                             |
| 31742501 | 11591 | <i>SNX27</i>    | Cytosol(GO:0005829)                | Microsome(GO:0005792)             | Endosome(GO:0005768)        |
| 31742516 | 06013 | <i>FXN</i>      | Cytoplasm(GO:0005737)              | Mitochondrion(GO:0005739)         |                             |
| 31742534 | 02765 | <i>ETV1</i>     | Nucleus(GO:0005634)                |                                   |                             |
| 31982904 | 10486 | <i>NUP35</i>    | Nuclear membrane(GO:0005635)       | Nucleus(GO:0005634)               |                             |
| 32171186 | 02319 | <i>BCAP31</i>   | Endoplasmic reticulum(GO:0005783)  | Mitochondrion(GO:0005739)         | Golgi apparatus(GO:0005794) |
| 32189392 | 02763 | <i>PRDX2</i>    | Cytoplasm(GO:0005737)              | Plasma membrane(GO:0005886)       |                             |
| 32189394 | 00044 | <i>ATP5B</i>    | Mitochondrion(GO:0005739)          | Nucleolus(GO:0005730)             | Extracellular(GO:0005576)   |
| 32307132 | 04597 | <i>NFS1</i>     | Mitochondrion(GO:0005739)          | Nucleus(GO:0005634)               | Cytoplasm(GO:0005737)       |
| 32454741 | 02968 | <i>SERPINH1</i> | Endoplasmic reticulum(GO:0005783)  | Nucleolus(GO:0005730)             | Plasma membrane(GO:0005886) |
| 32483374 | 10119 | <i>NOP56</i>    | Nucleolus(GO:0005730)              | Ribosome(GO:0005840)              |                             |
| 32483399 | 05428 | <i>PAK2</i>     | Endoplasmic reticulum(GO:0005783)  | Nucleus(GO:0005634)               | Cytoplasm(GO:0005737)       |
| 32490557 | 10407 | <i>PAPOLA</i>   | -                                  |                                   |                             |
| 32698700 | 06599 | <i>PHF8</i>     | Nucleus(GO:0005634)                |                                   |                             |
| 32967285 | 05717 | <i>UBE2C</i>    | Nucleus(GO:0005634)                |                                   |                             |
| 32967311 | 01494 | <i>EPHA2</i>    | Plasma membrane(GO:0005886)        |                                   |                             |
| 32996709 | 13029 | <i>TMED7</i>    | -                                  |                                   |                             |
| 33188443 | 09750 | <i>MACF1</i>    | Cytoplasm(GO:0005737)              | Nucleus(GO:0005634)               | Microtubule(GO:0005874)     |
| 33188449 | 04280 | <i>SRPK2</i>    | Nucleus(GO:0005634)                | Cytoplasm(GO:0005737)             |                             |
| 33188463 | 17602 | <i>MRPS9</i>    | Mitochondrion(GO:0005739)          |                                   |                             |
| 33286418 | 01529 | <i>PKM2</i>     | Cytoplasm(GO:0005737)              | Extracellular(GO:0005576)         | Cytosol(GO:0005829)         |
| 33286422 | 01529 | <i>PKM2</i>     | Cytoplasm(GO:0005737)              | Extracellular(GO:0005576)         | Cytosol(GO:0005829)         |
| 33350932 | 02524 | <i>DYNC1H1</i>  | Cytoplasm(GO:0005737)              | Plasma membrane(GO:0005886)       | Endosome(GO:0005768)        |
| 33356174 | 04401 | <i>PNN</i>      | Plasma membrane(GO:0005886)        | Nucleolus(GO:0005730)             | Nucleus(GO:0005634)         |
| 33356177 | 01470 | <i>PTPN11</i>   | Cytoplasm(GO:0005737)              | Plasma membrane(GO:0005886)       |                             |
| 33356547 | 00303 | <i>MCM2</i>     | Nucleus(GO:0005634)                | Chromosome(GO:0005694)            | Nucleolus(GO:0005730)       |
| 33457316 | 15910 | <i>PLEKHO2</i>  | -                                  |                                   |                             |
| 33469919 | 09094 | <i>MCM4</i>     | Nucleus(GO:0005634)                | Chromosome(GO:0005694)            | Nucleolus(GO:0005730)       |
| 33469941 | 06852 | <i>POLR1B</i>   | Nucleus(GO:0005634)                |                                   |                             |
| 33469968 | 01154 | <i>MCM7</i>     | Nucleus(GO:0005634)                | Chromosome(GO:0005694)            | Nucleolus(GO:0005730)       |
| 33598948 | 01398 | <i>PLCG1</i>    | Cytoplasm(GO:0005737)              | Nucleus(GO:0005634)               |                             |
| 33598954 | 12290 | <i>SLC25A24</i> | Mitochondrial membrane(GO:0005740) |                                   |                             |
| 33620775 | 02661 | <i>KTN1</i>     | Nucleus(GO:0005634)                | Endoplasmic reticulum(GO:0005783) | Cytoplasm(GO:0005737)       |
| 33636719 | 05450 | <i>TIMM44</i>   | Mitochondrion(GO:0005739)          |                                   |                             |
| 33636750 | 10928 | <i>UBE2O</i>    | Cytoplasm(GO:0005737)              |                                   |                             |
| 33695095 | 06692 | <i>RAB10</i>    | Nucleus(GO:0005634)                | Golgi vesicle(GO:0005798)         | Mitochondrion(GO:0005739)   |

|          |       |                 |                                   |                                  |                               |
|----------|-------|-----------------|-----------------------------------|----------------------------------|-------------------------------|
| 33695117 | 15545 | <i>TP53I11</i>  | Cytoplasm(GO:0005737)             | Integral to membrane(GO:0016021) |                               |
| 33859833 | 18073 | <i>TM9SF3</i>   | Plasma membrane(GO:0005886)       |                                  |                               |
| 33942072 | 06745 | <i>CNPY3</i>    | -                                 |                                  |                               |
| 33946282 | 10889 | <i>KIAA1429</i> | Nucleus(GO:0005634)               | Cytoplasm(GO:0005737)            |                               |
| 33946291 | 08572 | <i>LPCAT1</i>   | Endoplasmic reticulum(GO:0005783) | Golgi apparatus(GO:0005794)      |                               |
| 33946327 | 00258 | <i>NUP214</i>   | Nucleus(GO:0005634)               |                                  |                               |
| 33946329 | 01549 | <i>RALA</i>     | Plasma membrane(GO:0005886)       | Mitochondrion(GO:0005739)        | Membrane fraction(GO:0005624) |
| 34098946 | 01095 | <i>YBX1</i>     | Nucleus(GO:0005634)               | Cytoplasm(GO:0005737)            |                               |
| 34101286 | 15730 | <i>ZFR</i>      | Nucleus(GO:0005634)               | Nucleolus(GO:0005730)            |                               |
| 34147513 | 03805 | <i>RAB7A</i>    | Endosome(GO:0005768)              | Mitochondrion(GO:0005739)        | Lysosome(GO:0005764)          |
| 34147540 | 14007 | <i>FLYWCH2</i>  | -                                 |                                  |                               |
| 34147630 | 03861 | <i>TUFM</i>     | Mitochondrion(GO:0005739)         | Nucleolus(GO:0005730)            |                               |
| 34147637 | 16735 | <i>COPS6</i>    | Cytoplasm(GO:0005737)             | Nucleus(GO:0005634)              |                               |
| 34222121 | 14853 | <i>NUP37</i>    | Nucleus(GO:0005634)               | Nuclear membrane(GO:0005635)     |                               |
| 34304358 | 05180 | <i>NFKBIL2</i>  | -                                 |                                  |                               |
| 34335134 | 02538 | <i>SEC13</i>    | Endoplasmic reticulum(GO:0005783) | Cytoplasm(GO:0005737)            | Nuclear membrane(GO:0005635)  |
| 34335262 | 10166 | <i>ZMYND8</i>   | Nucleus(GO:0005634)               | Cytoplasm(GO:0005737)            |                               |
| 34452703 | 00153 | <i>ASNS</i>     | Cytoplasm(GO:0005737)             | Cytosol(GO:0005829)              |                               |
| 34577063 | 00050 | <i>ADSS</i>     | Cytoplasm(GO:0005737)             |                                  |                               |
| 34740329 | 05644 | <i>HNRNPA3</i>  | Nucleus(GO:0005634)               | Cytoplasm(GO:0005737)            |                               |
| 34850074 | 12678 | <i>GLOD4</i>    | Mitochondrion(GO:0005739)         |                                  |                               |
| 34878787 | 09737 | <i>RNF25</i>    | Nucleus(GO:0005634)               | Cytoplasm(GO:0005737)            |                               |
| 34915990 | 18601 | <i>RBPM52</i>   | -                                 |                                  |                               |
| 34932414 | 02098 | <i>NONO</i>     | Nucleus(GO:0005634)               | Mitochondrion(GO:0005739)        | Nucleolus(GO:0005730)         |
| 35493916 | 01609 | <i>RPN2</i>     | Endoplasmic reticulum(GO:0005783) | Mitochondrion(GO:0005739)        |                               |
| 36796743 | 09967 | <i>MTHFD1L</i>  | Mitochondrion(GO:0005739)         |                                  |                               |
| 37537716 | 03417 | <i>EIF5</i>     | Cytoplasm(GO:0005737)             |                                  |                               |
| 37577157 | 03963 | <i>CAPN5</i>    | Cytoplasm(GO:0005737)             |                                  |                               |
| 37594464 | 14851 | <i>NUDT5</i>    | -                                 |                                  |                               |
| 37595548 | 09685 | <i>PLEKHA6</i>  | -                                 |                                  |                               |
| 38016914 | 08418 | <i>SAMHD1</i>   | Nucleus(GO:0005634)               | Cytoplasm(GO:0005737)            |                               |
| 38026892 | 05194 | <i>ALG6</i>     | Endoplasmic reticulum(GO:0005783) | Golgi apparatus(GO:0005794)      |                               |
| 38045910 | 02883 | <i>LAMA3</i>    | Extracellular(GO:0005576)         |                                  |                               |
| 38045942 | 04413 | <i>UBA3</i>     | Nucleus(GO:0005634)               | Cytoplasm(GO:0005737)            |                               |
| 38176287 | 00216 | <i>BCAT1</i>    | Cytoplasm(GO:0005737)             | Mitochondrion(GO:0005739)        |                               |
| 38176300 | 09020 | <i>NES</i>      | Cytoplasm(GO:0005737)             | Nucleus(GO:0005634)              |                               |
| 38195089 | 04257 | <i>PRMT1</i>    | Nucleus(GO:0005634)               | Cytoplasm(GO:0005737)            |                               |
| 38201623 | 06774 | <i>EIF4G1</i>   | Nucleus(GO:0005634)               | Cytoplasm(GO:0005737)            |                               |
| 38201627 | 06774 | <i>EIF4G1</i>   | Nucleus(GO:0005634)               | Cytoplasm(GO:0005737)            |                               |
| 38201710 | 10532 | <i>DDX17</i>    | Nucleus(GO:0005634)               | Nucleolus(GO:0005730)            |                               |
| 38201714 | 16025 | <i>ELAVL1</i>   | Nucleus(GO:0005634)               | Nucleolus(GO:0005730)            | Mitochondrion(GO:0005739)     |



|          |       |          |                                   |                                   |                                   |
|----------|-------|----------|-----------------------------------|-----------------------------------|-----------------------------------|
| 38202214 | 06714 | SEC23A   | Cytoplasm(GO:0005737)             | Cytoplasmic vesicle(GO:0016023)   | Endoplasmic reticulum(GO:0005783) |
| 38202255 | 01762 | TARS     | Cytoplasm(GO:0005737)             | Ribosome(GO:0005840)              | Mitochondrion(GO:0005739)         |
| 38202257 | 03516 | GANAB    | Endoplasmic reticulum(GO:0005783) | Centrosome(GO:0005813)            |                                   |
| 38327039 | 09025 | HSPA4    | Golgi apparatus(GO:0005794)       | Cytoplasm(GO:0005737)             | Extracellular(GO:0005576)         |
| 38327625 | 00349 | CS       | Mitochondrial matrix(GO:0005759)  | Cytosol(GO:0005829)               | Mitochondrion(GO:0005739)         |
| 38327634 | 05894 | DDX18    | Nucleus(GO:0005634)               | Nucleolus(GO:0005730)             |                                   |
| 38372925 | 00176 | BSG      | Cytoplasm(GO:0005737)             | Plasma membrane(GO:0005886)       | Nucleus(GO:0005634)               |
| 38373671 | 06217 | SEC24C   | Endoplasmic reticulum(GO:0005783) | Cytoplasm(GO:0005737)             |                                   |
| 38373690 | 09888 | COPS4    | -                                 |                                   |                                   |
| 38455427 | 05506 | CCT4     | Cytoplasm(GO:0005737)             | Microtubule(GO:0005874)           | Mitochondrion(GO:0005739)         |
| 38505222 | 15591 | TMX3     | Integral to membrane(GO:0016021)  |                                   |                                   |
| 38569423 | 00155 | ACLY     | Cytoplasm(GO:0005737)             | Mitochondrion(GO:0005739)         |                                   |
| 38569477 | 11861 | MTX1     | Mitochondrion(GO:0005739)         | Perinuclear region(GO:0048471)    | Cytosol(GO:0005829)               |
| 38570062 | 12909 | C7orf20  | -                                 |                                   |                                   |
| 38570099 | 13372 | QRICH1   | -                                 |                                   |                                   |
| 38570132 | 02918 | AGFG1    | Nucleus(GO:0005634)               | Nucleolus(GO:0005730)             | Cytoplasm(GO:0005737)             |
| 38570156 | 14845 | NT5DC1   | Cytoplasm(GO:0005737)             |                                   |                                   |
| 38679957 | 02649 | ABR      | Cytoplasm(GO:0005737)             |                                   |                                   |
| 38679960 | 01938 | ACACA    | Cytoplasm(GO:0005737)             | Nucleus(GO:0005634)               |                                   |
| 38708321 | 10024 | INO80    | Nucleus(GO:0005634)               | Chromosome(GO:0005694)            |                                   |
| 38788319 | 00879 | GNL1     | Nucleus(GO:0005634)               | Cytoplasm(GO:0005737)             |                                   |
| 38788372 | 12468 | AQR      | Nucleus(GO:0005634)               |                                   |                                   |
| 38788416 | 01033 | LAMA1    | Extracellular(GO:0005576)         | Nucleus(GO:0005634)               |                                   |
| 39725636 | 09975 | TMED9    | Endoplasmic reticulum(GO:0005783) | Mitochondrion(GO:0005739)         |                                   |
| 39753957 | 13958 | TOR1AIP1 | Nucleus(GO:0005634)               | Endoplasmic reticulum(GO:0005783) |                                   |
| 39780588 | 07681 | TSR1     | Nucleus(GO:0005634)               |                                   |                                   |
| 39930345 | 13789 | PDXDC1   | Nucleus(GO:0005634)               | Cytoplasm(GO:0005737)             |                                   |
| 39930353 | 13777 | SKIV2L2  | Nucleus(GO:0005634)               | Nucleolus(GO:0005730)             |                                   |
| 39930469 | 12552 | RPF2     | Nucleolus(GO:0005730)             | Nucleus(GO:0005634)               |                                   |
| 39995082 | 08620 | NSUN2    | Nucleolus(GO:0005730)             | Nucleus(GO:0005634)               | Cytoplasm(GO:0005737)             |
| 40018633 | 07235 | IDI1     | Peroxisome(GO:0005777)            |                                   |                                   |
| 40068518 | 01391 | PGD      | Cytoplasm(GO:0005737)             |                                   |                                   |
| 40217805 | 08667 | NOL9     | Nucleolus(GO:0005730)             |                                   |                                   |
| 40217808 | 07383 | EHMT1    | Nucleus(GO:0005634)               |                                   |                                   |
| 40217812 | 10263 | TBRG4    | Mitochondrion(GO:0005739)         | Nucleus(GO:0005634)               |                                   |
| 40217847 | 03391 | SNRNP200 | Nucleus(GO:0005634)               | Mitochondrion(GO:0005739)         | Nucleolus(GO:0005730)             |
| 40254450 | 05122 | IFITM1   | Plasma membrane(GO:0005886)       |                                   |                                   |
| 40254816 | 00777 | HSP90AA1 | Cytoplasm(GO:0005737)             | Extracellular space(GO:0005615)   | Microtubule(GO:0005874)           |
| 40254861 | 06665 | UBAP2L   | Nucleus(GO:0005634)               | Cytoplasm(GO:0005737)             |                                   |
| 40254924 | 15181 | LRRC59   | Integral to membrane(GO:0016021)  | Membrane fraction(GO:0005624)     |                                   |
| 40255039 | 13341 | UBE1L2   | -                                 |                                   |                                   |

|          |       |                     |                                    |                                   |                             |
|----------|-------|---------------------|------------------------------------|-----------------------------------|-----------------------------|
| 40288288 | 09158 | <i>CARM1</i>        | Nucleus(GO:0005634)                |                                   |                             |
| 40353734 | 01246 | <i>NPM1</i>         | Nucleolus(GO:0005730)              | Nucleus(GO:0005634)               | Centrosome(GO:0005813)      |
| 40385883 | 01608 | <i>RPE</i>          | Cytoplasm(GO:0005737)              |                                   |                             |
| 40548408 | 09159 | <i>KIAA1967</i>     | Nucleus(GO:0005634)                | Mitochondrion(GO:0005739)         | Cytoplasm(GO:0005737)       |
| 40549448 | 02694 | <i>VAV2</i>         | Cytoplasm(GO:0005737)              | Nucleus(GO:0005634)               |                             |
| 40788003 | 09652 | <i>PSME4</i>        | Nucleus(GO:0005634)                |                                   |                             |
| 40789249 | 07677 | <i>DARS2</i>        | Mitochondrion(GO:0005739)          |                                   |                             |
| 40804742 | 13348 | <i>ZC3H14</i>       | Nucleus(GO:0005634)                |                                   |                             |
| 40805827 | 06089 | <i>COPE</i>         | Cytoplasm(GO:0005737)              | Endoplasmic reticulum(GO:0005783) | Golgi apparatus(GO:0005794) |
| 40805868 | 11947 | <i>TPD52L2</i>      | Cytoplasm(GO:0005737)              | Nucleus(GO:0005634)               |                             |
| 40806190 | 11926 | <i>TMEM189-UBE2</i> | Nucleus(GO:0005634)                | Endoplasmic reticulum(GO:0005783) |                             |
| 40807485 | 10729 | <i>PRPF6</i>        | Nucleus(GO:0005634)                |                                   |                             |
| 41152056 | 04869 | <i>EFTUD2</i>       | Nucleus(GO:0005634)                | Cytoplasm(GO:0005737)             | Nucleolus(GO:0005730)       |
| 41281437 | 14854 | <i>NUP93</i>        | Nucleus(GO:0005634)                | Nuclear membrane(GO:0005635)      | Mitochondrion(GO:0005739)   |
| 41281483 | 10689 | <i>BMS1</i>         | Nucleolus(GO:0005730)              | Nucleus(GO:0005634)               | Ribosome(GO:0005840)        |
| 41281521 | 06472 | <i>NCAPD2</i>       | Cytoplasm(GO:0005737)              | Microtubule(GO:0005874)           | Mitochondrion(GO:0005739)   |
| 41281579 | 07587 | <i>SACM1L</i>       | Endoplasmic reticulum(GO:0005783)  | Golgi apparatus(GO:0005794)       |                             |
| 41281885 | 13691 | <i>UCRC</i>         | Mitochondrial membrane(GO:0005740) |                                   |                             |
| 41322916 | 03180 | <i>PLEC1</i>        | Cytoskeleton(GO:0005856)           | Mitochondrion(GO:0005739)         | Nucleolus(GO:0005730)       |
| 41327691 | 10731 | <i>KIF16B</i>       | -                                  |                                   |                             |
| 41327776 | 10863 | <i>DDX47</i>        | Nucleus(GO:0005634)                | Nucleolus(GO:0005730)             | Cytoplasm(GO:0005737)       |
| 41349439 | 15314 | <i>SEC31A</i>       | Endoplasmic reticulum(GO:0005783)  | Nucleus(GO:0005634)               | Cytoplasm(GO:0005737)       |
| 41349456 | 02673 | <i>PREP</i>         | Cytoplasm(GO:0005737)              | Nucleus(GO:0005634)               | Mitochondrion(GO:0005739)   |
| 41350333 | 05227 | <i>TBCD</i>         | Microtubule(GO:0005874)            |                                   |                             |
| 41393561 | 07516 | <i>LAP3</i>         | Cytoplasm(GO:0005737)              |                                   |                             |
| 41393599 | 00417 | <i>CPOX</i>         | Mitochondrion(GO:0005739)          |                                   |                             |
| 41393608 | 18516 | <i>RTN3</i>         | Endoplasmic reticulum(GO:0005783)  | Nucleus(GO:0005634)               | Golgi apparatus(GO:0005794) |
| 41399285 | 00318 | <i>HSPD1</i>        | Mitochondrial matrix(GO:0005759)   | Peroxisomal matrix(GO:0005782)    | Plasma membrane(GO:0005886) |
| 41406064 | 01178 | <i>MYH10</i>        | Cytoplasm(GO:0005737)              |                                   |                             |
| 41406084 | 11749 | <i>GPX1</i>         | Cytosol(GO:0005829)                | Cytoplasm(GO:0005737)             | Mitochondrion(GO:0005739)   |
| 41872631 | 02567 | <i>FASN</i>         | Cytoplasm(GO:0005737)              | Mitochondrion(GO:0005739)         | Nucleus(GO:0005634)         |
| 42476028 | 12500 | <i>ATAD3A</i>       | -                                  |                                   |                             |
| 42476281 | 01904 | <i>VDAC2</i>        | Mitochondrion(GO:0005739)          | Cytoplasm(GO:0005737)             | Zymogen granule(GO:0042588) |
| 42490749 | 02137 | <i>ABCB7</i>        | Mitochondrion(GO:0005739)          |                                   |                             |
| 42516576 | 12659 | <i>GLRX5</i>        | Mitochondrion(GO:0005739)          |                                   |                             |
| 42518070 | 06369 | <i>TJP2</i>         | Cytoplasm(GO:0005737)              | Cell junction(GO:0030054)         | Nucleus(GO:0005634)         |
| 42542379 | 10441 | <i>SRRM1</i>        | Nucleus(GO:0005634)                | Cytoplasm(GO:0005737)             |                             |
| 42542392 | 09875 | <i>CEBPZ</i>        | Nucleus(GO:0005634)                | Nucleolus(GO:0005730)             |                             |
| 42544123 | 03306 | <i>SF1</i>          | Nucleus(GO:0005634)                | Cytoplasm(GO:0005737)             |                             |
| 42544159 | 09990 | <i>HSPH1</i>        | Cytoplasm(GO:0005737)              | Nucleus(GO:0005634)               | Cytosol(GO:0005829)         |
| 42558250 | 03108 | <i>CAPRIN1</i>      | Plasma membrane(GO:0005886)        |                                   |                             |

|          |       |                 |                                   |                                   |                             |
|----------|-------|-----------------|-----------------------------------|-----------------------------------|-----------------------------|
| 42716275 | 11999 | <i>CNOT1</i>    | Nucleus(GO:0005634)               |                                   |                             |
| 42716289 | 00558 | <i>EPB41</i>    | Nucleus(GO:0005634)               | Cytoplasm(GO:0005737)             | Centrosome(GO:0005813)      |
| 42716291 | 00558 | <i>EPB41</i>    | Nucleus(GO:0005634)               | Cytoplasm(GO:0005737)             | Centrosome(GO:0005813)      |
| 42734377 | 09880 | <i>CHD1L</i>    | Nucleus(GO:0005634)               |                                   |                             |
| 42734430 | 04433 | <i>PTRF</i>     | Nucleus(GO:0005634)               | Cytoplasm(GO:0005737)             |                             |
| 42734438 | 13313 | <i>FAM49B</i>   | -                                 |                                   |                             |
| 42794754 | 03845 | <i>ACSL3</i>    | Peroxisome(GO:0005777)            | Mitochondrion(GO:0005739)         |                             |
| 42794769 | 03995 | <i>PAK1</i>     | Plasma membrane(GO:0005886)       | Cell projection(GO:0042995)       | Cytoplasm(GO:0005737)       |
| 42794771 | 18249 | <i>TXNDC5</i>   | Endoplasmic reticulum(GO:0005783) | Plasma membrane(GO:0005886)       | Golgi apparatus(GO:0005794) |
| 42822874 | 01412 | <i>RNH1</i>     | Cytoplasm(GO:0005737)             |                                   |                             |
| 44662836 | 04248 | <i>BCAR1</i>    | Cytoplasm(GO:0005737)             | Endoplasmic reticulum(GO:0005783) | Nucleus(GO:0005634)         |
| 44771198 | 11934 | <i>PRMT3</i>    | Cytoplasm(GO:0005737)             | Ribosome(GO:0005840)              | Nucleus(GO:0005634)         |
| 44771201 | 13883 | <i>INTS5</i>    | Nucleus(GO:0005634)               | Cytosol(GO:0005829)               |                             |
| 44889481 | 08407 | <i>MYO1B</i>    | Plasma membrane(GO:0005886)       | Cytoplasm(GO:0005737)             | Nucleus(GO:0005634)         |
| 45006986 | 04676 | <i>AIMP1</i>    | Extracellular(GO:0005576)         | Microtubule(GO:0005874)           | Nucleus(GO:0005634)         |
| 4501867  | 00012 | <i>ACO2</i>     | Mitochondrion(GO:0005739)         |                                   |                             |
| 4501885  | 00032 | <i>ACTB</i>     | Cytoplasm(GO:0005737)             | Extracellular(GO:0005576)         | Plasma membrane(GO:0005886) |
| 4501887  | 00017 | <i>ACTG1</i>    | Cytoplasm(GO:0005737)             | Cytosol(GO:0005829)               |                             |
| 4501891  | 00020 | <i>ACTN1</i>    | Cytoplasm(GO:0005737)             | Nucleus(GO:0005634)               | Cytosol(GO:0005829)         |
| 4501901  | 00092 | <i>ACY1</i>     | Cytoplasm(GO:0005737)             |                                   |                             |
| 4501955  | 01435 | <i>PARP1</i>    | Nucleus(GO:0005634)               | Cytoplasm(GO:0005737)             | Nucleolus(GO:0005730)       |
| 4501993  | 04337 | <i>AGPS</i>     | Peroxisome(GO:0005777)            | Mitochondrion(GO:0005739)         |                             |
| 4502049  | 00071 | <i>AKR1B1</i>   | Cytoplasm(GO:0005737)             | Extracellular(GO:0005576)         |                             |
| 4502099  | 02147 | <i>SLC25A5</i>  | Mitochondrion(GO:0005739)         |                                   |                             |
| 4502101  | 01060 | <i>ANXA1</i>    | Plasma membrane(GO:0005886)       | Mitochondrion(GO:0005739)         | Cytoplasm(GO:0005737)       |
| 4502107  | 00568 | <i>ANXA5</i>    | Cytoplasm(GO:0005737)             | Nucleus(GO:0005634)               | Plasma membrane(GO:0005886) |
| 4502167  | 00100 | <i>APP</i>      | Cell surface(GO:0009986)          | Plasma membrane(GO:0005886)       | Golgi apparatus(GO:0005794) |
| 4502169  | 04545 | <i>NAE1</i>     | Cytoplasm(GO:0005737)             |                                   |                             |
| 4502171  | 00029 | <i>APRT</i>     | -                                 |                                   |                             |
| 4502203  | 00056 | <i>ARF3</i>     | Cytoplasm(GO:0005737)             | Golgi apparatus(GO:0005794)       | Plasma membrane(GO:0005886) |
| 4502205  | 03107 | <i>ARF4</i>     | Cytoplasm(GO:0005737)             | Golgi apparatus(GO:0005794)       | Plasma membrane(GO:0005886) |
| 4502229  | 11869 | <i>ARL2</i>     | Cytoplasm(GO:0005737)             |                                   |                             |
| 4502247  | 03778 | <i>ARVCF</i>    | Plasma membrane(GO:0005886)       | Nucleus(GO:0005634)               |                             |
| 4502281  | 03521 | <i>ATP1B3</i>   | Plasma membrane(GO:0005886)       |                                   |                             |
| 4502285  | 00161 | <i>ATP2A2</i>   | Nucleus(GO:0005634)               | Endoplasmic reticulum(GO:0005783) | Mitochondrion(GO:0005739)   |
| 4502303  | 02899 | <i>ATP5O</i>    | Mitochondrion(GO:0005739)         |                                   |                             |
| 4502317  | 00163 | <i>ATP6V1E1</i> | Lysosome(GO:0005764)              | Cytoplasm(GO:0005737)             | Golgi apparatus(GO:0005794) |
| 4502389  | 04817 | <i>BANF1</i>    | Nucleus(GO:0005634)               | Nucleolus(GO:0005730)             |                             |
| 4502403  | 02359 | <i>BGN</i>      | Extracellular(GO:0005576)         |                                   |                             |
| 4502419  | 02967 | <i>BLVRB</i>    | Cytoplasm(GO:0005737)             |                                   |                             |
| 4502491  | 03168 | <i>C1QBP</i>    | Nucleus(GO:0005634)               | Mitochondrion(GO:0005739)         | Golgi apparatus(GO:0005794) |

|         |       |                |                                   |                             |                                   |
|---------|-------|----------------|-----------------------------------|-----------------------------|-----------------------------------|
| 4502551 | 04569 | <i>CALU</i>    | Endoplasmic reticulum(GO:0005783) | Mitochondrion(GO:0005739)   | Nucleus(GO:0005634)               |
| 4502567 | 02164 | <i>CASK</i>    | Plasma membrane(GO:0005886)       | Cytoplasm(GO:0005737)       | Nucleus(GO:0005634)               |
| 4502599 | 00267 | <i>CBR1</i>    | Cytoplasm(GO:0005737)             |                             |                                   |
| 4502643 | 00089 | <i>CCT6A</i>   | Cytoplasm(GO:0005737)             | Microtubule(GO:0005874)     |                                   |
| 4502693 | 00880 | <i>CD9</i>     | Cell surface(GO:0009986)          | Plasma membrane(GO:0005886) |                                   |
| 4502709 | 00302 | <i>CDC2</i>    | Cytoplasm(GO:0005737)             | Mitochondrion(GO:0005739)   | Centrosome(GO:0005813)            |
| 4502803 | 04356 | <i>CHEK1</i>   | Nucleus(GO:0005634)               |                             |                                   |
| 4502923 | 03848 | <i>CNN3</i>    | Cytoplasm(GO:0005737)             | Nucleus(GO:0005634)         |                                   |
| 4502981 | 00466 | <i>COX4I1</i>  | Mitochondrion(GO:0005739)         | Nucleus(GO:0005634)         | Cytoplasm(GO:0005737)             |
| 4503015 | 05016 | <i>CPNE3</i>   | Cytoplasm(GO:0005737)             |                             |                                   |
| 4503029 | 08353 | <i>CRABP2</i>  | Cytoplasm(GO:0005737)             | Nucleus(GO:0005634)         |                                   |
| 4503095 | 00277 | <i>CSNK2A1</i> | Nucleus(GO:0005634)               | Plasma membrane(GO:0005886) | Cytoplasm(GO:0005737)             |
| 4503101 | 03523 | <i>CSRP2</i>   | Nucleus(GO:0005634)               |                             |                                   |
| 4503117 | 03091 | <i>CSTB</i>    | Nucleus(GO:0005634)               | Cytoplasm(GO:0005737)       |                                   |
| 4503131 | 00286 | <i>CTNNB1</i>  | Plasma membrane(GO:0005886)       | Cell junction(GO:0030054)   | Basolateral membrane(GO:0016323)  |
| 4503133 | 00465 | <i>CTPS</i>    | Cytoplasm(GO:0005737)             |                             |                                   |
| 4503141 | 03841 | <i>CTSC</i>    | Lysosome(GO:0005764)              | Mitochondrion(GO:0005739)   |                                   |
| 4503143 | 00291 | <i>CTSD</i>    | Lysosome(GO:0005764)              | Golgi apparatus(GO:0005794) | Endoplasmic reticulum(GO:0005783) |
| 4503165 | 09123 | <i>CUL3</i>    | Nucleus(GO:0005634)               | Golgi apparatus(GO:0005794) |                                   |
| 4503173 | 11804 | <i>CXADR</i>   | Plasma membrane(GO:0005886)       | Mitochondrion(GO:0005739)   | Cytoplasm(GO:0005737)             |
| 4503183 | 08941 | <i>CYB5A</i>   | Mitochondrion(GO:0005739)         |                             |                                   |
| 4503249 | 00503 | <i>DEK</i>     | Nucleus(GO:0005634)               | Cytoplasm(GO:0005737)       |                                   |
| 4503269 | 00507 | <i>DCK</i>     | Cytoplasm(GO:0005737)             | Nucleus(GO:0005634)         |                                   |
| 4503327 | 08942 | <i>CYB5R3</i>  | Cytoplasm(GO:0005737)             | Plasma membrane(GO:0005886) | Endoplasmic reticulum(GO:0005783) |
| 4503337 | 02129 | <i>DKC1</i>    | Nucleus(GO:0005634)               | Nucleolus(GO:0005730)       |                                   |
| 4503351 | 00532 | <i>DNMT1</i>   | Nucleus(GO:0005634)               | Nucleolus(GO:0005730)       | Mitochondrion(GO:0005739)         |
| 4503377 | 03914 | <i>DPYSL2</i>  | Cytoplasm(GO:0005737)             | Microtubule(GO:0005874)     | Nucleus(GO:0005634)               |
| 4503379 | 03104 | <i>DPYSL3</i>  | Cytoplasm(GO:0005737)             | Nucleus(GO:0005634)         |                                   |
| 4503381 | 03284 | <i>DR1</i>     | Nucleus(GO:0005634)               |                             |                                   |
| 4503453 | 09235 | <i>EDF1</i>    | Nucleus(GO:0005634)               | Cytoplasm(GO:0005737)       |                                   |
| 4503471 | 00559 | <i>EEF1A1</i>  | Cytoplasm(GO:0005737)             | Nucleolus(GO:0005730)       | Mitochondrion(GO:0005739)         |
| 4503475 | 04265 | <i>EEF1A2</i>  | Cytoplasm(GO:0005737)             | Nucleolus(GO:0005730)       |                                   |
| 4503481 | 11745 | <i>EEF1G</i>   | Cytoplasm(GO:0005737)             | Mitochondrion(GO:0005739)   | Nucleolus(GO:0005730)             |
| 4503483 | 00561 | <i>EEF2</i>    | Cytoplasm(GO:0005737)             | Nucleus(GO:0005634)         | Cytosol(GO:0005829)               |
| 4503503 | 09458 | <i>EIF2B1</i>  | Cytoplasm(GO:0005737)             | Plasma membrane(GO:0005886) |                                   |
| 4503507 | 02155 | <i>EIF2S3</i>  | Cytoplasm(GO:0005737)             | Nucleolus(GO:0005730)       |                                   |
| 4503509 | 03618 | <i>EIF3A</i>   | Cytoplasm(GO:0005737)             |                             |                                   |
| 4503513 | 04884 | <i>EIF3I</i>   | Ribosome(GO:0005840)              |                             |                                   |
| 4503515 | 04885 | <i>EIF3H</i>   | Cytoplasm(GO:0005737)             | Ribosome(GO:0005840)        | Cytosol(GO:0005829)               |
| 4503521 | 03734 | <i>EIF3E</i>   | Cytoplasm(GO:0005737)             | Nucleus(GO:0005634)         |                                   |
| 4503523 | 04888 | <i>EIF3D</i>   | Cytoplasm(GO:0005737)             |                             |                                   |

|         |       |                  |                                   |                                   |                                |
|---------|-------|------------------|-----------------------------------|-----------------------------------|--------------------------------|
| 4503529 | 04030 | <i>EIF4A1</i>    | Cytoplasm(GO:0005737)             | Nucleus(GO:0005634)               | Ribosome(GO:0005840)           |
| 4503535 | 00591 | <i>EIF4E</i>     | Nucleus(GO:0005634)               | Cytoplasm(GO:0005737)             | Perinuclear region(GO:0048471) |
| 4503539 | 09084 | <i>EIF4G2</i>    | Cytoplasm(GO:0005737)             | Ribosome(GO:0005840)              |                                |
| 4503571 | 01400 | <i>ENO1</i>      | Cytoplasm(GO:0005737)             | Nucleus(GO:0005634)               | Extracellular(GO:0005576)      |
| 4503579 | 09126 | <i>EPB41L2</i>   | Plasma membrane(GO:0005886)       | Cytoplasm(GO:0005737)             | Mitochondrion(GO:0005739)      |
| 4503583 | 00581 | <i>EPHX1</i>     | Endoplasmic reticulum(GO:0005783) | Endosome(GO:0005768)              | Nucleus(GO:0005634)            |
| 4503607 | 01979 | <i>ETFA</i>      | Mitochondrion(GO:0005739)         |                                   |                                |
| 4503613 | 03352 | <i>EVPL</i>      | Plasma membrane(GO:0005886)       | Cytoplasm(GO:0005737)             | Nucleus(GO:0005634)            |
| 4503685 | 00606 | <i>FDPS</i>      | Peroxisome(GO:0005777)            |                                   |                                |
| 4503727 | 01743 | <i>FKBP3</i>     | Nucleus(GO:0005634)               | Cytoplasm(GO:0005737)             |                                |
| 4503729 | 11794 | <i>FKBP4</i>     | Cytoplasm(GO:0005737)             | Nucleus(GO:0005634)               |                                |
| 4503749 | 01297 | <i>FLT1</i>      | Plasma membrane(GO:0005886)       | Extracellular(GO:0005576)         |                                |
| 4503841 | 01071 | <i>XRCC6</i>     | Nucleus(GO:0005634)               | Cytoplasm(GO:0005737)             | Nucleolus(GO:0005730)          |
| 4503915 | 00716 | <i>GART</i>      | Cytosol(GO:0005829)               |                                   |                                |
| 4503971 | 02114 | <i>GDI1</i>      | Cytoplasm(GO:0005737)             |                                   |                                |
| 4503981 | 00702 | <i>GFPT1</i>     | Cytoplasm(GO:0005737)             |                                   |                                |
| 4504001 | 00414 | <i>GJA1</i>      | Cell surface(GO:0009986)          | Perinuclear region(GO:0048471)    |                                |
| 4504035 | 10927 | <i>GMPS</i>      | -                                 |                                   |                                |
| 4504041 | 00764 | <i>GNAI2</i>     | Plasma membrane(GO:0005886)       | Endoplasmic reticulum(GO:0005783) | Cytosol(GO:0005829)            |
| 4504067 | 00687 | <i>GOT1</i>      | Cytoplasm(GO:0005737)             | Mitochondrion(GO:0005739)         |                                |
| 4504111 | 00150 | <i>GRB2</i>      | Cytoplasm(GO:0005737)             | Nucleus(GO:0005634)               | Plasma membrane(GO:0005886)    |
| 4504165 | 00674 | <i>GSN</i>       | Extracellular(GO:0005576)         | Mitochondrion(GO:0005739)         | Cytoskeleton(GO:0005856)       |
| 4504183 | 00614 | <i>GSTP1</i>     | Cytoplasm(GO:0005737)             | Mitochondrion(GO:0005739)         | Nucleus(GO:0005634)            |
| 4504191 | 07202 | <i>MSH6</i>      | Nucleus(GO:0005634)               | Cytoplasm(GO:0005737)             |                                |
| 4504253 | 03465 | <i>H2AFX</i>     | Nucleus(GO:0005634)               | Nucleolus(GO:0005730)             |                                |
| 4504259 | 11898 | <i>HIST1H2BL</i> | Nucleus(GO:0005634)               | Nucleolus(GO:0005730)             |                                |
| 4504261 | 11899 | <i>HIST1H2BN</i> | Nucleus(GO:0005634)               | Nucleolus(GO:0005730)             |                                |
| 4504327 | 00887 | <i>HADHB</i>     | Mitochondrion(GO:0005739)         |                                   |                                |
| 4504391 | 00809 | <i>HK1</i>       | Cytoplasm(GO:0005737)             | Plasma membrane(GO:0005886)       | Mitochondrion(GO:0005739)      |
| 4504425 | 01228 | <i>HMGB1</i>     | Nucleus(GO:0005634)               | Extracellular(GO:0005576)         | Plasma membrane(GO:0005886)    |
| 4504433 | 02829 | <i>HMGA1</i>     | Nucleus(GO:0005634)               | Cytoplasm(GO:0005737)             |                                |
| 4504445 | 01242 | <i>HNRNPA1</i>   | Nucleus(GO:0005634)               | Nucleolus(GO:0005730)             | Mitochondrion(GO:0005739)      |
| 4504447 | 02526 | <i>HNRNPA2B1</i> | Nucleus(GO:0005634)               | Cytoplasm(GO:0005737)             | Mitochondrion(GO:0005739)      |
| 4504483 | 02388 | <i>HPRT1</i>     | Cytoplasm(GO:0005737)             |                                   |                                |
| 4504505 | 03514 | <i>HSD17B4</i>   | Peroxisome(GO:0005777)            | Nucleolus(GO:0005730)             | Mitochondrion(GO:0005739)      |
| 4504511 | 04159 | <i>DNAJA1</i>    | Acrosome(GO:0001669)              | Golgi apparatus(GO:0005794)       | Nucleus(GO:0005634)            |
| 4504517 | 09076 | <i>HSPB1</i>     | Cytoplasm(GO:0005737)             | Plasma membrane(GO:0005886)       | Microtubule(GO:0005874)        |
| 4504523 | 02535 | <i>HSPE1</i>     | Mitochondrion(GO:0005739)         | Nucleolus(GO:0005730)             |                                |
| 4504715 | 04557 | <i>PABPC4</i>    | Cytoplasm(GO:0005737)             |                                   |                                |
| 4504771 | 04221 | <i>EIF6</i>      | Cytoplasm(GO:0005737)             | Nuclear matrix(GO:0016363)        | Desmosome(GO:0030057)          |
| 4504865 | 10350 | <i>KHSRP</i>     | Nucleus(GO:0005634)               | Cytoplasm(GO:0005737)             |                                |

|         |       |                 |                                   |                             |                                 |
|---------|-------|-----------------|-----------------------------------|-----------------------------|---------------------------------|
| 4504897 | 02818 | <i>KPNA2</i>    | Cytoplasm(GO:0005737)             | Plasma membrane(GO:0005886) | Nucleolus(GO:0005730)           |
| 4504901 | 04275 | <i>KPNA4</i>    | Cytoplasm(GO:0005737)             | Nucleolus(GO:0005730)       | Nucleus(GO:0005634)             |
| 4504919 | 01015 | <i>KRT8</i>     | Cytoplasm(GO:0005737)             | Extracellular(GO:0005576)   | Cytoskeleton(GO:0005856)        |
| 4504951 | 01029 | <i>LAMB1</i>    | Extracellular(GO:0005576)         |                             |                                 |
| 4504981 | 01040 | <i>LGALS1</i>   | Extracellular(GO:0005576)         | Plasma membrane(GO:0005886) | Nucleus(GO:0005634)             |
| 4505021 | 00082 | <i>LRPAP1</i>   | Endoplasmic reticulum(GO:0005783) | Endosome(GO:0005768)        | Cytoplasm(GO:0005737)           |
| 4505029 | 01056 | <i>LTA4H</i>    | Cytoplasm(GO:0005737)             | Nucleus(GO:0005634)         |                                 |
| 4505061 | 01106 | <i>M6PR</i>     | Plasma membrane(GO:0005886)       | Endosome(GO:0005768)        | Cytoplasmic vesicle(GO:0016023) |
| 4505183 | 02434 | <i>CD99</i>     | Integral to membrane(GO:0016021)  | Cytoplasm(GO:0005737)       |                                 |
| 4505185 | 01091 | <i>MIF</i>      | Extracellular(GO:0005576)         | Cytoplasm(GO:0005737)       |                                 |
| 4505229 | 03909 | <i>FADD</i>     | Cytoplasm(GO:0005737)             | Early endosome(GO:0005769)  | Plasma membrane(GO:0005886)     |
| 4505257 | 02399 | <i>MSN</i>      | Cytoplasm(GO:0005737)             | Nucleus(GO:0005634)         | Cytoskeleton(GO:0005856)        |
| 4505317 | 03606 | <i>PPP1R12A</i> | Cytoplasm(GO:0005737)             | Plasma membrane(GO:0005886) |                                 |
| 4505343 | 02717 | <i>NCBP1</i>    | Nucleus(GO:0005634)               | Cytoplasm(GO:0005737)       |                                 |
| 4505369 | 04073 | <i>NDUFS4</i>   | Mitochondrion(GO:0005739)         |                             |                                 |
| 4505453 | 04036 | <i>NRD1</i>     | Plasma membrane(GO:0005886)       |                             |                                 |
| 4505541 | 09135 | <i>USO1</i>     | Golgi apparatus(GO:0005794)       | Nucleus(GO:0005634)         | Cytosol(GO:0005829)             |
| 4505581 | 04573 | <i>PRKRA</i>    | Cytoplasm(GO:0005737)             |                             |                                 |
| 4505585 | 03940 | <i>PAFAH1B2</i> | Cytoplasm(GO:0005737)             | Extracellular(GO:0005576)   |                                 |
| 4505587 | 04354 | <i>PAFAH1B3</i> | Cytoplasm(GO:0005737)             |                             |                                 |
| 4505591 | 01458 | <i>PRDX1</i>    | Cytoplasm(GO:0005737)             | Nucleolus(GO:0005730)       | Mitochondrion(GO:0005739)       |
| 4505621 | 06850 | <i>PEBP1</i>    | Cytoplasm(GO:0005737)             | Plasma membrane(GO:0005886) |                                 |
| 4505641 | 01456 | <i>PCNA</i>     | Nucleus(GO:0005634)               | Nucleolus(GO:0005730)       | Cytoplasm(GO:0005737)           |
| 4505685 | 02420 | <i>PDHA1</i>    | Mitochondrion(GO:0005739)         | Nucleus(GO:0005634)         |                                 |
| 4505687 | 01530 | <i>PDHB</i>     | Mitochondrion(GO:0005739)         |                             |                                 |
| 4505701 | 01526 | <i>PDXK</i>     | Cytoplasm(GO:0005737)             |                             |                                 |
| 4505705 | 04579 | <i>PEA15</i>    | Cytoplasm(GO:0005737)             | Nucleus(GO:0005634)         |                                 |
| 4505749 | 01988 | <i>PFKM</i>     | -                                 |                             |                                 |
| 4505751 | 01451 | <i>PFN2</i>     | Cytoplasm(GO:0005737)             |                             |                                 |
| 4505763 | 02412 | <i>PGK1</i>     | Cytoplasm(GO:0005737)             | Nucleus(GO:0005634)         | Mitochondrion(GO:0005739)       |
| 4505773 | 01454 | <i>PHB</i>      | Mitochondrion(GO:0005739)         | Cytoplasm(GO:0005737)       | Nucleus(GO:0005634)             |
| 4505901 | 12680 | <i>TMEM11</i>   | Plasma membrane(GO:0005886)       |                             |                                 |
| 4505941 | 15943 | <i>POLR2B</i>   | Nucleus(GO:0005634)               |                             |                                 |
| 4505999 | 09237 | <i>PPM1G</i>    | Nucleoplasm(GO:0005654)           | Cytoplasm(GO:0005737)       |                                 |
| 4506007 | 08911 | <i>PPP1CC</i>   | Nucleus(GO:0005634)               | Nucleolus(GO:0005730)       | Microtubule(GO:0005874)         |
| 4506017 | 08912 | <i>PPP2CA</i>   | Cytoplasm(GO:0005737)             | Mitochondrion(GO:0005739)   | Chromosome(GO:0005694)          |
| 4506019 | 09223 | <i>PPP2R2A</i>  | Cytoplasm(GO:0005737)             | Chromosome(GO:0005694)      |                                 |
| 4506031 | 07203 | <i>PPT1</i>     | Lysosome(GO:0005764)              |                             |                                 |
| 4506051 | 08899 | <i>PRIM1</i>    | Nucleus(GO:0005634)               |                             |                                 |
| 4506127 | 02413 | <i>PRPS1</i>    | -                                 |                             |                                 |
| 4506133 | 04789 | <i>PRPSAP2</i>  | Nucleus(GO:0005634)               | Cytoplasm(GO:0005737)       |                                 |

|         |       |                |                                   |                             |                           |
|---------|-------|----------------|-----------------------------------|-----------------------------|---------------------------|
| 4506179 | 04170 | <i>PSMA1</i>   | Cytoplasm(GO:0005737)             | Nucleus(GO:0005634)         |                           |
| 4506181 | 08907 | <i>PSMA2</i>   | -                                 |                             |                           |
| 4506183 | 01463 | <i>PSMA3</i>   | Cytoplasm(GO:0005737)             | Nucleus(GO:0005634)         |                           |
| 4506189 | 05967 | <i>PSMA7</i>   | Cytoplasm(GO:0005737)             | Nucleolus(GO:0005730)       | Nucleus(GO:0005634)       |
| 4506193 | 03603 | <i>PSMB1</i>   | -                                 |                             |                           |
| 4506195 | 03708 | <i>PSMB2</i>   | Cytoplasm(GO:0005737)             |                             |                           |
| 4506201 | 02629 | <i>PSMB5</i>   | Cytoplasm(GO:0005737)             | Cytosol(GO:0005829)         | Nucleus(GO:0005634)       |
| 4506203 | 04940 | <i>PSMB7</i>   | Cytoplasm(GO:0005737)             | Nucleus(GO:0005634)         |                           |
| 4506209 | 01105 | <i>PSMC2</i>   | Cytoplasm(GO:0005737)             | Nucleus(GO:0005634)         |                           |
| 4506217 | 04594 | <i>PSMD10</i>  | Cytoplasm(GO:0005737)             | Nucleus(GO:0005634)         |                           |
| 4506221 | 05120 | <i>PSMD12</i>  | Cytoplasm(GO:0005737)             |                             |                           |
| 4506233 | 10171 | <i>PSMD8</i>   | Cytoplasm(GO:0005737)             |                             |                           |
| 4506243 | 02823 | <i>PTBP1</i>   | Nucleus(GO:0005634)               | Nucleolus(GO:0005730)       | Cytoplasm(GO:0005737)     |
| 4506301 | 02864 | <i>PTPN9</i>   | Cytoplasm(GO:0005737)             |                             |                           |
| 4506339 | 02610 | <i>PEX19</i>   | Cytoplasm(GO:0005737)             | Peroxisome(GO:0005777)      |                           |
| 4506341 | 01368 | <i>ABCD3</i>   | Peroxisome(GO:0005777)            | Mitochondrion(GO:0005739)   |                           |
| 4506357 | 05086 | <i>MPZL1</i>   | Integral to membrane(GO:0016021)  | Cytoplasm(GO:0005737)       | Nucleus(GO:0005634)       |
| 4506359 | 02025 | <i>QDPR</i>    | Extracellular(GO:0005576)         |                             |                           |
| 4506363 | 04053 | <i>RAB13</i>   | Cytoplasmic vesicle(GO:0016023)   | Plasma membrane(GO:0005886) |                           |
| 4506365 | 01539 | <i>RAB2A</i>   | Endoplasmic reticulum(GO:0005783) | Cytoplasm(GO:0005737)       | Mitochondrion(GO:0005739) |
| 4506387 | 06772 | <i>RAD23B</i>  | Nucleus(GO:0005634)               | Cytoplasm(GO:0005737)       |                           |
| 4506407 | 03110 | <i>RANBP1</i>  | Cytoplasm(GO:0005737)             | Nucleus(GO:0005634)         | Centrosome(GO:0005813)    |
| 4506411 | 03839 | <i>RANGAP1</i> | Cytoplasm(GO:0005737)             | Kinetochore(GO:0000776)     | Microtubule(GO:0005874)   |
| 4506431 | 00745 | <i>RASA1</i>   | Cytoplasm(GO:0005737)             | Plasma membrane(GO:0005886) |                           |
| 4506439 | 04231 | <i>RBBP7</i>   | Nucleus(GO:0005634)               | Nucleolus(GO:0005730)       |                           |
| 4506455 | 04111 | <i>RCN1</i>    | Endoplasmic reticulum(GO:0005783) |                             |                           |
| 4506457 | 03993 | <i>RCN2</i>    | Endoplasmic reticulum(GO:0005783) |                             |                           |
| 4506467 | 01534 | <i>RDX</i>     | Plasma membrane(GO:0005886)       | Cytoplasm(GO:0005737)       |                           |
| 4506489 | 02676 | <i>RFC3</i>    | Nucleolus(GO:0005730)             | Nucleus(GO:0005634)         |                           |
| 4506583 | 01565 | <i>RPA1</i>    | Nucleus(GO:0005634)               |                             |                           |
| 4506585 | 01566 | <i>RPA2</i>    | Nucleus(GO:0005634)               |                             |                           |
| 4506587 | 01567 | <i>RPA3</i>    | Nucleolus(GO:0005730)             | Cytoplasm(GO:0005737)       |                           |
| 4506597 | 01603 | <i>RPL12</i>   | Nucleus(GO:0005634)               | Mitochondrion(GO:0005739)   | Ribosome(GO:0005840)      |
| 4506605 | 04716 | <i>RPL23</i>   | Ribosome(GO:0005840)              |                             |                           |
| 4506607 | 16046 | <i>RPL18</i>   | Ribosome(GO:0005840)              | Mitochondrion(GO:0005739)   | Nucleolus(GO:0005730)     |
| 4506609 | 01594 | <i>RPL19</i>   | Ribosome(GO:0005840)              |                             |                           |
| 4506613 | 01602 | <i>RPL22</i>   | Ribosome(GO:0005840)              | Nucleolus(GO:0005730)       | Nucleus(GO:0005634)       |
| 4506619 | 10365 | <i>RPL24</i>   | Ribosome(GO:0005840)              |                             |                           |
| 4506621 | 04746 | <i>RPL26</i>   | Ribosome(GO:0005840)              | Nucleolus(GO:0005730)       |                           |
| 4506623 | 09602 | <i>RPL27</i>   | Cytoplasm(GO:0005737)             | Nucleolus(GO:0005730)       |                           |
| 4506625 | 04701 | <i>RPL27A</i>  | Ribosome(GO:0005840)              | Mitochondrion(GO:0005739)   | Nucleolus(GO:0005730)     |

|         |       |                |                                   |                             |                             |
|---------|-------|----------------|-----------------------------------|-----------------------------|-----------------------------|
| 4506631 | 01595 | <i>RPL30</i>   | -                                 |                             |                             |
| 4506633 | 17994 | <i>RPL31</i>   | Ribosome(GO:0005840)              | Nucleolus(GO:0005730)       |                             |
| 4506643 | 17997 | <i>RPL37A</i>  | Ribosome(GO:0005840)              |                             |                             |
| 4506647 | 03546 | <i>RPL39</i>   | Ribosome(GO:0005840)              |                             |                             |
| 4506649 | 16042 | <i>RPL3</i>    | Cytoplasm(GO:0005737)             | Ribosome(GO:0005840)        | Nucleolus(GO:0005730)       |
| 4506651 | 01597 | <i>RPL36AL</i> | Ribosome(GO:0005840)              |                             |                             |
| 4506661 | 01712 | <i>RPL7A</i>   | Cytoplasm(GO:0005737)             | Extracellular(GO:0005576)   | Nucleus(GO:0005634)         |
| 4506663 | 16044 | <i>RPL8</i>    | Nucleolus(GO:0005730)             | Mitochondrion(GO:0005739)   |                             |
| 4506667 | 01610 | <i>RPLP0</i>   | Ribosome(GO:0005840)              | Mitochondrion(GO:0005739)   | Nucleolus(GO:0005730)       |
| 4506669 | 01611 | <i>RPLP1</i>   | Ribosome(GO:0005840)              | Mitochondrion(GO:0005739)   | Nucleus(GO:0005634)         |
| 4506671 | 01612 | <i>RPLP2</i>   | Cytoplasm(GO:0005737)             | Nucleolus(GO:0005730)       |                             |
| 4506675 | 01598 | <i>RPN1</i>    | Endoplasmic reticulum(GO:0005783) | Cytosol(GO:0005829)         | Cytoplasm(GO:0005737)       |
| 4506679 | 04697 | <i>RPS10</i>   | Ribosome(GO:0005840)              | Nucleolus(GO:0005730)       |                             |
| 4506681 | 01599 | <i>RPS11</i>   | Ribosome(GO:0005840)              | Nucleolus(GO:0005730)       |                             |
| 4506685 | 01604 | <i>RPS13</i>   | Ribosome(GO:0005840)              | Nucleolus(GO:0005730)       |                             |
| 4506687 | 01613 | <i>RPS15</i>   | Ribosome(GO:0005840)              |                             |                             |
| 4506691 | 04724 | <i>RPS16</i>   | Ribosome(GO:0005840)              | Nucleolus(GO:0005730)       |                             |
| 4506693 | 01600 | <i>RPS17</i>   | Ribosome(GO:0005840)              | Nucleolus(GO:0005730)       |                             |
| 4506695 | 04591 | <i>RPS19</i>   | Nucleolus(GO:0005730)             | Mitochondrion(GO:0005739)   |                             |
| 4506697 | 04728 | <i>RPS20</i>   | Ribosome(GO:0005840)              |                             |                             |
| 4506699 | 01605 | <i>RPS21</i>   | Ribosome(GO:0005840)              |                             |                             |
| 4506701 | 04729 | <i>RPS23</i>   | Ribosome(GO:0005840)              | Nucleolus(GO:0005730)       |                             |
| 4506703 | 03877 | <i>RPS24</i>   | Ribosome(GO:0005840)              |                             |                             |
| 4506711 | 04744 | <i>RPS27</i>   | Cytoplasm(GO:0005737)             | Extracellular(GO:0005576)   | Nucleolus(GO:0005730)       |
| 4506713 | 01878 | <i>RPS27A</i>  | Ribosome(GO:0005840)              | Cytoplasm(GO:0005737)       |                             |
| 4506723 | 01606 | <i>RPS3A</i>   | Cytoplasm(GO:0005737)             | Cytosol(GO:0005829)         | Ribosome(GO:0005840)        |
| 4506725 | 02427 | <i>RPS4X</i>   | Ribosome(GO:0005840)              | Cytosol(GO:0005829)         | Nucleolus(GO:0005730)       |
| 4506741 | 04712 | <i>RPS7</i>    | Ribosome(GO:0005840)              |                             |                             |
| 4506743 | 15969 | <i>RPS8</i>    | Cytoplasm(GO:0005737)             | Nucleolus(GO:0005730)       |                             |
| 4506753 | 09143 | <i>RUVBL1</i>  | Nucleus(GO:0005634)               | Nucleolus(GO:0005730)       | Chromosome(GO:0005694)      |
| 4506761 | 00232 | <i>S100A10</i> | Plasma membrane(GO:0005886)       | Cytoplasm(GO:0005737)       | Nucleus(GO:0005634)         |
| 4506787 | 04541 | <i>IQGAP1</i>  | Cytoplasm(GO:0005737)             | Mitochondrion(GO:0005739)   | Plasma membrane(GO:0005886) |
| 4506891 | 09023 | <i>SET</i>     | Nucleus(GO:0005634)               | Plasma membrane(GO:0005886) | Cytoplasm(GO:0005737)       |
| 4506901 | 04530 | <i>SFRS3</i>   | Nucleus(GO:0005634)               | Nucleolus(GO:0005730)       | Mitochondrion(GO:0005739)   |
| 4506903 | 09053 | <i>SFRS9</i>   | Nucleus(GO:0005634)               | Nucleolus(GO:0005730)       |                             |
| 4506921 | 04568 | <i>SGTA</i>    | Cytoplasm(GO:0005737)             | Nucleus(GO:0005634)         |                             |
| 4506929 | 03462 | <i>SH3GL1</i>  | Cytoplasm(GO:0005737)             | Cytosol(GO:0005829)         | Nucleus(GO:0005634)         |
| 4507115 | 04068 | <i>FSCN1</i>   | Cytoplasm(GO:0005737)             | Cytosol(GO:0005829)         | Plasma membrane(GO:0005886) |
| 4507125 | 01655 | <i>SNRPB</i>   | Nucleus(GO:0005634)               | Ribosome(GO:0005840)        | Cytoplasm(GO:0005737)       |
| 4507129 | 00548 | <i>SNRPE</i>   | Nucleus(GO:0005634)               | Cytoplasm(GO:0005737)       |                             |
| 4507131 | 04645 | <i>SNRPF</i>   | Nucleus(GO:0005634)               | Cytoplasm(GO:0005737)       |                             |



|          |       |                |                                   |                                   |                             |
|----------|-------|----------------|-----------------------------------|-----------------------------------|-----------------------------|
| 4507133  | 04646 | <i>SNRPG</i>   | Nucleus(GO:0005634)               | Cytoplasm(GO:0005737)             |                             |
| 4507135  | 01653 | <i>SNRPN</i>   | Nucleus(GO:0005634)               |                                   |                             |
| 4507171  | 01631 | <i>SPARC</i>   | Extracellular(GO:0005576)         | Cytoplasm(GO:0005737)             |                             |
| 4507191  | 01684 | <i>SPTAN1</i>  | Cytoplasm(GO:0005737)             | Cytosol(GO:0005829)               | Plasma membrane(GO:0005886) |
| 4507207  | 01680 | <i>SRI</i>     | Cytoplasm(GO:0005737)             | Plasma membrane(GO:0005886)       |                             |
| 4507231  | 02703 | <i>SSBP1</i>   | Mitochondrion(GO:0005739)         | Nucleus(GO:0005634)               |                             |
| 4507241  | 05061 | <i>SSRP1</i>   | Nucleus(GO:0005634)               | Nucleolus(GO:0005730)             | Chromosome(GO:0005694)      |
| 4507353  | 09031 | <i>TAF15</i>   | Nucleus(GO:0005634)               | Nucleolus(GO:0005730)             |                             |
| 4507357  | 06864 | <i>TAGLN2</i>  | -                                 |                                   |                             |
| 4507375  | 05381 | <i>TBCE</i>    | Cytoplasm(GO:0005737)             |                                   |                             |
| 4507457  | 01812 | <i>TFRC</i>    | Plasma membrane(GO:0005886)       | Nucleus(GO:0005634)               | Extracellular(GO:0005576)   |
| 4507491  | 03072 | <i>THOP1</i>   | Cytoplasm(GO:0005737)             | Plasma membrane(GO:0005886)       | Extracellular(GO:0005576)   |
| 4507521  | 06001 | <i>TKT</i>     | Cytoplasm(GO:0005737)             |                                   |                             |
| 4507555  | 01777 | <i>TMPO</i>    | Mitochondrion(GO:0005739)         | Cytoplasm(GO:0005737)             | Nucleus(GO:0005634)         |
| 4507645  | 01833 | <i>TPI1</i>    | Cytoplasm(GO:0005737)             |                                   |                             |
| 4507651  | 11734 | <i>TPM4</i>    | Cytoskeleton(GO:0005856)          |                                   |                             |
| 4507657  | 01834 | <i>TPP2</i>    | Cytoplasm(GO:0005737)             | Plasma membrane(GO:0005886)       |                             |
| 4507669  | 15979 | <i>TPT1</i>    | Nucleus(GO:0005634)               | Plasma membrane(GO:0005886)       | Cytoplasm(GO:0005737)       |
| 4507677  | 01860 | <i>HSP90B1</i> | Endoplasmic reticulum(GO:0005783) | Cytosol(GO:0005829)               | Mitochondrion(GO:0005739)   |
| 4507785  | 09045 | <i>UBE2I</i>   | Nucleus(GO:0005634)               | Nucleolus(GO:0005730)             | Mitochondrion(GO:0005739)   |
| 4507789  | 04762 | <i>UBE2L3</i>  | Cytoplasm(GO:0005737)             | Perinuclear region(GO:0048471)    | Nucleus(GO:0005634)         |
| 4507793  | 04725 | <i>UBE2N</i>   | Nucleus(GO:0005634)               |                                   |                             |
| 4507811  | 04190 | <i>UGCG</i>    | Golgi apparatus(GO:0005794)       | Endoplasmic reticulum(GO:0005783) |                             |
| 4507813  | 04535 | <i>UGDH</i>    | -                                 |                                   |                             |
| 4507835  | 02022 | <i>UMPS</i>    | Nucleus(GO:0005634)               |                                   |                             |
| 4507855  | 03265 | <i>USP5</i>    | Extracellular(GO:0005576)         |                                   |                             |
| 4507857  | 03950 | <i>USP7</i>    | Nucleus(GO:0005634)               | Cytosol(GO:0005829)               |                             |
| 4507873  | 02135 | <i>VBP1</i>    | Cytoplasm(GO:0005737)             | Nucleus(GO:0005634)               |                             |
| 4507879  | 05137 | <i>VDAC1</i>   | Mitochondrion(GO:0005739)         | Endosome(GO:0005768)              | Nucleolus(GO:0005730)       |
| 4507903  | 03701 | <i>VRK1</i>    | Nucleus(GO:0005634)               | Nucleolus(GO:0005730)             |                             |
| 4507943  | 03975 | <i>XPO1</i>    | Nucleus(GO:0005634)               | Nucleolus(GO:0005730)             | Kinetochores(GO:0000776)    |
| 4507947  | 09153 | <i>YARS</i>    | Cytoplasm(GO:0005737)             | Extracellular(GO:0005576)         |                             |
| 4507949  | 03184 | <i>YWHAB</i>   | Cytoplasm(GO:0005737)             | Mitochondrion(GO:0005739)         |                             |
| 4507951  | 00215 | <i>YWHAH</i>   | Cytoplasm(GO:0005737)             | Nucleus(GO:0005634)               |                             |
| 4507953  | 03183 | <i>YWHAZ</i>   | Cytoplasm(GO:0005737)             | Plasma membrane(GO:0005886)       | Cytosol(GO:0005829)         |
| 45267832 | 13825 | <i>FASTKD2</i> | -                                 |                                   |                             |
| 45269149 | 06950 | <i>QPRT</i>    | -                                 |                                   |                             |
| 45359849 | 06570 | <i>G3BP2</i>   | Cytoplasm(GO:0005737)             | Nucleus(GO:0005634)               |                             |
| 45439306 | 04361 | <i>DARS</i>    | Cytoplasm(GO:0005737)             | Cytosol(GO:0005829)               |                             |
| 45446747 | 09909 | <i>DDX42</i>   | Nucleus(GO:0005634)               | Cytoplasm(GO:0005737)             |                             |
| 45545411 | 05353 | <i>NCKAP1</i>  | Cytoplasm(GO:0005737)             | Mitochondrion(GO:0005739)         |                             |

|          |       |                 |                             |                                   |                                   |
|----------|-------|-----------------|-----------------------------|-----------------------------------|-----------------------------------|
| 4557032  | 01026 | <i>LDHB</i>     | Cytoplasm(GO:0005737)       |                                   |                                   |
| 4557231  | 08447 | <i>ACADM</i>    | Mitochondrion(GO:0005739)   |                                   |                                   |
| 4557269  | 00049 | <i>ADSL</i>     | Cytoplasm(GO:0005737)       |                                   |                                   |
| 4557305  | 00070 | <i>ALDOA</i>    | Cytoplasm(GO:0005737)       | Nucleus(GO:0005634)               | Cytosol(GO:0005829)               |
| 4557325  | 00135 | <i>APOE</i>     | Extracellular(GO:0005576)   | Cytoplasm(GO:0005737)             |                                   |
| 4557343  | 00124 | <i>ALDH7A1</i>  | -                           |                                   |                                   |
| 4557415  | 01994 | <i>CBS</i>      | Cytoplasm(GO:0005737)       |                                   |                                   |
| 4557537  | 04286 | <i>DRG2</i>     | -                           |                                   |                                   |
| 4557553  | 02309 | <i>EMD</i>      | Nucleus(GO:0005634)         | Cytoplasm(GO:0005737)             | Endoplasmic reticulum(GO:0005783) |
| 4557581  | 05524 | <i>FABP5</i>    | Cytoplasm(GO:0005737)       | Endoplasmic reticulum(GO:0005783) |                                   |
| 4557719  | 00534 | <i>LIG1</i>     | Nucleus(GO:0005634)         |                                   |                                   |
| 4557753  | 02047 | <i>MID1</i>     | Microtubule(GO:0005874)     | Nucleus(GO:0005634)               | Cytoplasm(GO:0005737)             |
| 4557761  | 00389 | <i>MSH2</i>     | Nucleus(GO:0005634)         |                                   |                                   |
| 4557797  | 01131 | <i>NME1</i>     | Cytoplasm(GO:0005737)       | Extracellular(GO:0005576)         | Mitochondrion(GO:0005739)         |
| 4557801  | 01247 | <i>NP</i>       | Cytoplasm(GO:0005737)       |                                   |                                   |
| 4557809  | 02021 | <i>OAT</i>      | Mitochondrion(GO:0005739)   |                                   |                                   |
| 4557888  | 01020 | <i>KRT18</i>    | Cytoplasm(GO:0005737)       | Nucleolus(GO:0005730)             | Extracellular(GO:0005576)         |
| 45643129 | 06419 | <i>GNL3</i>     | Nucleolus(GO:0005730)       | Nucleus(GO:0005634)               |                                   |
| 45827771 | 06911 | <i>EDC4</i>     | Nucleus(GO:0005634)         | Cytoplasm(GO:0005737)             |                                   |
| 46094014 | 02334 | <i>GSPT2</i>    | Cytoplasm(GO:0005737)       |                                   |                                   |
| 46094058 | 09132 | <i>PAPSS1</i>   | Nucleus(GO:0005634)         |                                   |                                   |
| 46249388 | 01406 | <i>PSPH</i>     | Cytoplasm(GO:0005737)       |                                   |                                   |
| 46276863 | 01344 | <i>PTMS</i>     | Nucleus(GO:0005634)         |                                   |                                   |
| 46367787 | 05247 | <i>PABPC1</i>   | Cytoplasm(GO:0005737)       | Nucleus(GO:0005634)               |                                   |
| 46409270 | 17288 | <i>TUBA3E</i>   | -                           |                                   |                                   |
| 46593007 | 01875 | <i>UQCRC1</i>   | Mitochondrion(GO:0005739)   | Nucleus(GO:0005634)               |                                   |
| 46852166 | 04058 | <i>MARK3</i>    | Cytoplasm(GO:0005737)       |                                   |                                   |
| 46852388 | 10811 | <i>CCAR1</i>    | Cytoplasm(GO:0005737)       |                                   |                                   |
| 46852390 | 09064 | <i>CCDC6</i>    | Cytoplasm(GO:0005737)       | Nucleus(GO:0005634)               |                                   |
| 47078240 | 15991 | <i>GPS1</i>     | Nucleus(GO:0005634)         | Golgi apparatus(GO:0005794)       | Cytoplasm(GO:0005737)             |
| 47132585 | 01486 | <i>PRKAR2B</i>  | Cytoplasm(GO:0005737)       | Golgi apparatus(GO:0005794)       | Nucleus(GO:0005634)               |
| 47132622 | 01134 | <i>MTAP</i>     | Cytoplasm(GO:0005737)       |                                   |                                   |
| 47271356 | 12288 | <i>SLC39A14</i> | Plasma membrane(GO:0005886) |                                   |                                   |
| 47271443 | 02888 | <i>SFRS2</i>    | Nucleus(GO:0005634)         | Nucleolus(GO:0005730)             |                                   |
| 47419911 | 04556 | <i>TRIM24</i>   | Nucleus(GO:0005634)         | Cytoplasm(GO:0005737)             |                                   |
| 47419916 | 01845 | <i>WARS</i>     | Cytoplasm(GO:0005737)       | Mitochondrion(GO:0005739)         |                                   |
| 47519616 | 11768 | <i>TPM2</i>     | Cytoskeleton(GO:0005856)    | Extracellular(GO:0005576)         |                                   |
| 47519639 | 01141 | <i>MAP4</i>     | Nucleus(GO:0005634)         | Cytoplasm(GO:0005737)             | Microtubule(GO:0005874)           |
| 4757714  | 08881 | <i>ACP1</i>     | Cytoplasm(GO:0005737)       |                                   |                                   |
| 4757732  | 02161 | <i>AIFM1</i>    | Mitochondrion(GO:0005739)   | Cytoplasm(GO:0005737)             | Nucleus(GO:0005634)               |
| 4757766  | 04108 | <i>ARHGAP1</i>  | Cytoplasm(GO:0005737)       | Extracellular(GO:0005576)         |                                   |

|         |       |                |                                   |                                    |                                 |
|---------|-------|----------------|-----------------------------------|------------------------------------|---------------------------------|
| 4757768 | 03565 | <i>ARHGDI2</i> | Cytoplasm(GO:0005737)             |                                    |                                 |
| 4757774 | 05260 | <i>ARL3</i>    | Cytoplasm(GO:0005737)             | Nucleus(GO:0005634)                |                                 |
| 4757804 | 03779 | <i>ATOX1</i>   | Cytoplasm(GO:0005737)             | Nucleus(GO:0005634)                |                                 |
| 4757900 | 00169 | <i>CALR</i>    | Endoplasmic reticulum(GO:0005783) | Sarcoplasmic reticulum(GO:0016529) | Extracellular(GO:0005576)       |
| 4757926 | 09201 | <i>RBM39</i>   | Nucleus(GO:0005634)               | Nucleolus(GO:0005730)              |                                 |
| 4758012 | 00350 | <i>CLTC</i>    | Cytoplasm(GO:0005737)             | Mitochondrion(GO:0005739)          | Golgi apparatus(GO:0005794)     |
| 4758018 | 03847 | <i>CNN2</i>    | Cytoplasm(GO:0005737)             | Mitochondrion(GO:0005739)          | Nucleus(GO:0005634)             |
| 4758030 | 03564 | <i>COPA</i>    | Cytoplasm(GO:0005737)             | Endoplasmic reticulum(GO:0005783)  | Mitochondrion(GO:0005739)       |
| 4758032 | 06103 | <i>COPB2</i>   | Cytoplasm(GO:0005737)             | Cytosol(GO:0005829)                | Cytoplasmic vesicle(GO:0016023) |
| 4758038 | 04799 | <i>COX5A</i>   | Mitochondrion(GO:0005739)         |                                    |                                 |
| 4758052 | 07520 | <i>CRABP1</i>  | Cytoplasm(GO:0005737)             |                                    |                                 |
| 4758112 | 00805 | <i>BAT1</i>    | Nucleus(GO:0005634)               | Nucleolus(GO:0005730)              |                                 |
| 4758116 | 00546 | <i>DAG1</i>    | Plasma membrane(GO:0005886)       | Extracellular(GO:0005576)          |                                 |
| 4758118 | 03646 | <i>DAP3</i>    | Mitochondrion(GO:0005739)         | Nucleus(GO:0005634)                | Cytoplasm(GO:0005737)           |
| 4758138 | 01615 | <i>DDX5</i>    | Nucleus(GO:0005634)               | Nucleolus(GO:0005730)              |                                 |
| 4758140 | 02638 | <i>DDX6</i>    | Cytoplasm(GO:0005737)             | Nucleus(GO:0005634)                |                                 |
| 4758148 | 03531 | <i>DFFA</i>    | Cytoplasm(GO:0005737)             | Nucleus(GO:0005634)                |                                 |
| 4758256 | 04881 | <i>EIF2S1</i>  | Cytoplasm(GO:0005737)             | Nucleolus(GO:0005730)              | Mitochondrion(GO:0005739)       |
| 4758272 | 11927 | <i>ENSA</i>    | Nucleus(GO:0005634)               |                                    |                                 |
| 4758304 | 06501 | <i>PDIA4</i>   | Endoplasmic reticulum(GO:0005783) | Mitochondrion(GO:0005739)          | Plasma membrane(GO:0005886)     |
| 4758328 | 00613 | <i>FABP3</i>   | Cytoplasm(GO:0005737)             |                                    |                                 |
| 4758332 | 02152 | <i>ACSL4</i>   | Microsome(GO:0005792)             | Mitochondrion(GO:0005739)          |                                 |
| 4758334 | 05854 | <i>FADS2</i>   | Endoplasmic reticulum(GO:0005783) |                                    |                                 |
| 4758340 | 04227 | <i>FARSA</i>   | Cytoplasm(GO:0005737)             |                                    |                                 |
| 4758356 | 02670 | <i>FEN1</i>    | Nucleus(GO:0005634)               | Nucleolus(GO:0005730)              |                                 |
| 4758384 | 04019 | <i>FKBP5</i>   | Cytoplasm(GO:0005737)             |                                    |                                 |
| 4758412 | 03782 | <i>GALNT2</i>  | Golgi apparatus(GO:0005794)       |                                    |                                 |
| 4758442 | 03420 | <i>GMFB</i>    | Cytoplasm(GO:0005737)             | Plasma membrane(GO:0005886)        |                                 |
| 4758484 | 10401 | <i>GSTO1</i>   | Nucleus(GO:0005634)               | Cytoplasm(GO:0005737)              | Plasma membrane(GO:0005886)     |
| 4758516 | 02079 | <i>HDGF</i>    | Nucleus(GO:0005634)               | Cytoplasm(GO:0005737)              | Extracellular(GO:0005576)       |
| 4758638 | 03817 | <i>PRDX6</i>   | Lysosome(GO:0005764)              | Cytoplasm(GO:0005737)              |                                 |
| 4758756 | 01248 | <i>NAP1L1</i>  | Nucleus(GO:0005634)               | Mitochondrion(GO:0005739)          |                                 |
| 4758762 | 00154 | <i>NARS</i>    | Cytoplasm(GO:0005737)             |                                    |                                 |
| 4758774 | 11958 | <i>NDUFB10</i> | Mitochondrion(GO:0005739)         |                                    |                                 |
| 4758786 | 04285 | <i>NDUFS2</i>  | Mitochondrion(GO:0005739)         |                                    |                                 |
| 4758788 | 10355 | <i>NDUFS3</i>  | Mitochondrion(GO:0005739)         |                                    |                                 |
| 4758796 | 16034 | <i>DRG1</i>    | Cytoplasm(GO:0005737)             |                                    |                                 |
| 4758844 | 05984 | <i>NUP155</i>  | Nucleus(GO:0005634)               | Mitochondrion(GO:0005739)          | Nuclear membrane(GO:0005635)    |
| 4758860 | 03864 | <i>NOLC1</i>   | Nucleolus(GO:0005730)             | Cytoplasm(GO:0005737)              |                                 |
| 4758862 | 10931 | <i>EEF1E1</i>  | Cytoplasm(GO:0005737)             |                                    |                                 |
| 4758874 | 09198 | <i>TM9SF2</i>  | Endosome(GO:0005768)              | Mitochondrion(GO:0005739)          |                                 |

|          |       |                 |                                   |                                   |                               |
|----------|-------|-----------------|-----------------------------------|-----------------------------------|-------------------------------|
| 4758896  | 03477 | <i>PEX14</i>    | Peroxisome(GO:0005777)            | Nucleus(GO:0005634)               |                               |
| 4758906  | 03480 | <i>SERPIN9</i>  | Cytoplasm(GO:0005737)             | Nucleus(GO:0005634)               |                               |
| 4758950  | 00458 | <i>PIIB</i>     | Endoplasmic reticulum(GO:0005783) | Nucleolus(GO:0005730)             | Plasma membrane(GO:0005886)   |
| 4758986  | 05009 | <i>RAB11B</i>   | Nucleus(GO:0005634)               | Plasma membrane(GO:0005886)       | Golgi apparatus(GO:0005794)   |
| 4758988  | 01538 | <i>RAB1A</i>    | Golgi apparatus(GO:0005794)       | Endoplasmic reticulum(GO:0005783) |                               |
| 4759034  | 02616 | <i>ETF1</i>     | Ribosome(GO:0005840)              | Nucleolus(GO:0005730)             | Cytoplasm(GO:0005737)         |
| 4759046  | 09661 | <i>POLR1C</i>   | Nucleolus(GO:0005730)             |                                   |                               |
| 4759048  | 14753 | <i>MRPL33</i>   | Mitochondrion(GO:0005739)         |                                   |                               |
| 4759068  | 04705 | <i>SCO1</i>     | Mitochondrion(GO:0005739)         |                                   |                               |
| 4759080  | 02914 | <i>SDHA</i>     | Mitochondrion(GO:0005739)         | Cytosol(GO:0005829)               |                               |
| 4759100  | 03599 | <i>SFRS11</i>   | Nucleus(GO:0005634)               | Cytoplasm(GO:0005737)             |                               |
| 4759140  | 05406 | <i>SLC9A3R1</i> | Cytoplasm(GO:0005737)             | Membrane fraction(GO:0005624)     |                               |
| 4759156  | 01658 | <i>SNRPA</i>    | Nucleus(GO:0005634)               | Nucleolus(GO:0005730)             |                               |
| 4759158  | 03038 | <i>SNRPD2</i>   | Nucleus(GO:0005634)               |                                   |                               |
| 4759160  | 03039 | <i>SNRPD3</i>   | Nucleus(GO:0005634)               | Nucleolus(GO:0005730)             |                               |
| 4759202  | 04891 | <i>SYNGR2</i>   | Plasma membrane(GO:0005886)       |                                   |                               |
| 4759212  | 18166 | <i>TBCA</i>     | Cytoskeleton(GO:0005856)          |                                   |                               |
| 4759224  | 06843 | <i>PDCD5</i>    | Cytoplasm(GO:0005737)             | Nucleus(GO:0005634)               |                               |
| 4759264  | 05146 | <i>COPS2</i>    | Nucleus(GO:0005634)               | Cytoplasm(GO:0005737)             |                               |
| 4759270  | 08993 | <i>TSN</i>      | Nucleus(GO:0005634)               | Cytoplasm(GO:0005737)             |                               |
| 4759274  | 04335 | <i>TXNL1</i>    | Cytoplasm(GO:0005737)             |                                   |                               |
| 4759302  | 09300 | <i>VAPB</i>     | Plasma membrane(GO:0005886)       | Mitochondrion(GO:0005739)         | Membrane fraction(GO:0005624) |
| 47607492 | 03180 | <i>PLEC1</i>    | Cytoskeleton(GO:0005856)          | Mitochondrion(GO:0005739)         | Nucleolus(GO:0005730)         |
| 48255885 | 02105 | <i>PRKCI</i>    | Cytoplasm(GO:0005737)             | Plasma membrane(GO:0005886)       | Microsome(GO:0005792)         |
| 48255891 | 03518 | <i>PRKCSH</i>   | Endoplasmic reticulum(GO:0005783) |                                   |                               |
| 48255907 | 02891 | <i>TAGLN</i>    | Cytoplasm(GO:0005737)             |                                   |                               |
| 48255966 | 08934 | <i>UGP2</i>     | -                                 |                                   |                               |
| 48255968 | 08934 | <i>UGP2</i>     | -                                 |                                   |                               |
| 4826657  | 00251 | <i>CALD1</i>    | Nucleus(GO:0005634)               | Cytoplasm(GO:0005737)             | Plasma membrane(GO:0005886)   |
| 4826686  | 03158 | <i>DDX1</i>     | Nucleus(GO:0005634)               | Nucleolus(GO:0005730)             |                               |
| 4826716  | 03724 | <i>SLC29A1</i>  | Plasma membrane(GO:0005886)       |                                   |                               |
| 4826734  | 00660 | <i>FUS</i>      | Nucleus(GO:0005634)               | Nucleolus(GO:0005730)             | Mitochondrion(GO:0005739)     |
| 4826760  | 03023 | <i>HNRNPF</i>   | Nucleus(GO:0005634)               | Nucleolus(GO:0005730)             | Cytoplasm(GO:0005737)         |
| 4826770  | 00894 | <i>IDE</i>      | Cytoplasm(GO:0005737)             | Extracellular(GO:0005576)         | Peroxisome(GO:0005777)        |
| 4826774  | 00958 | <i>ISG15</i>    | Extracellular(GO:0005576)         | Cytoplasm(GO:0005737)             |                               |
| 4826848  | 03398 | <i>NDUFA5</i>   | Mitochondrion(GO:0005739)         |                                   |                               |
| 4826852  | 11951 | <i>NDUFAB1</i>  | Mitochondrion(GO:0005739)         |                                   |                               |
| 4826862  | 03489 | <i>NME4</i>     | Mitochondrion(GO:0005739)         |                                   |                               |
| 4826878  | 06809 | <i>OXSRL1</i>   | Cytoplasm(GO:0005737)             | Integral to membrane(GO:0016021)  | Nucleus(GO:0005634)           |
| 4826898  | 01452 | <i>PFN1</i>     | Cytoplasm(GO:0005737)             | Extracellular(GO:0005576)         |                               |
| 4826952  | 05121 | <i>PSMD5</i>    | Cytoplasm(GO:0005737)             |                                   |                               |

|          |       |                 |                                   |                              |                             |
|----------|-------|-----------------|-----------------------------------|------------------------------|-----------------------------|
| 4826960  | 07223 | <i>QARS</i>     | Cytoplasm(GO:0005737)             | Cytosol(GO:0005829)          |                             |
| 4826972  | 05609 | <i>RBM8A</i>    | Nucleus(GO:0005634)               | Nucleolus(GO:0005730)        | Cytoplasm(GO:0005737)       |
| 4826998  | 07284 | <i>SFPQ</i>     | Nucleus(GO:0005634)               | Nucleolus(GO:0005730)        | Cytoplasm(GO:0005737)       |
| 4827040  | 07543 | <i>THRAP3</i>   | Nucleus(GO:0005634)               | Cytoplasm(GO:0005737)        |                             |
| 4827067  | 02088 | <i>ZMYM3</i>    | Nucleus(GO:0005634)               | Cytoplasm(GO:0005737)        |                             |
| 48375173 | 15989 | <i>MAP6</i>     | Cytoskeleton(GO:0005856)          | Synaptic vesicle(GO:0008021) | Axon(GO:0030424)            |
| 48526509 | 12118 | <i>TIMM50</i>   | Mitochondrion(GO:0005739)         |                              |                             |
| 48675813 | 04301 | <i>TNPO2</i>    | Nucleoplasm(GO:0005654)           | Cytoplasm(GO:0005737)        |                             |
| 48762932 | 10816 | <i>CCT8</i>     | Cytoplasm(GO:0005737)             | Mitochondrion(GO:0005739)    | Microtubule(GO:0005874)     |
| 4885049  | 00015 | <i>ACTC1</i>    | Cytoplasm(GO:0005737)             | Nucleus(GO:0005634)          |                             |
| 4885153  | 03596 | <i>CRKL</i>     | Cytoplasm(GO:0005737)             | Nucleus(GO:0005634)          |                             |
| 4885193  | 10343 | <i>ARID3A</i>   | Nucleus(GO:0005634)               | Cytoplasm(GO:0005737)        | Nucleoplasm(GO:0005654)     |
| 4885281  | 11748 | <i>GLUD1</i>    | Mitochondrion(GO:0005739)         | Cytosol(GO:0005829)          |                             |
| 4885371  | 00819 | <i>H1FO</i>     | Nucleus(GO:0005634)               | Cytoplasm(GO:0005737)        |                             |
| 4885375  | 07514 | <i>HIST1H1C</i> | Nucleus(GO:0005634)               | Mitochondrion(GO:0005739)    | Nucleolus(GO:0005730)       |
| 4885377  | 06764 | <i>HIST1H1D</i> | Nucleus(GO:0005634)               | Nucleolus(GO:0005730)        |                             |
| 4885379  | 07513 | <i>HIST1H1E</i> | Nucleus(GO:0005634)               | Nucleolus(GO:0005730)        |                             |
| 4885381  | 00821 | <i>HIST1H1B</i> | Nucleus(GO:0005634)               | Mitochondrion(GO:0005739)    | Nucleolus(GO:0005730)       |
| 4885399  | 05829 | <i>SMC3</i>     | Nucleus(GO:0005634)               | Chromosome(GO:0005694)       | Mitochondrion(GO:0005739)   |
| 4885409  | 00813 | <i>HDLBP</i>    | Cytoplasm(GO:0005737)             | Nucleolus(GO:0005730)        | Extracellular(GO:0005576)   |
| 4885413  | 03204 | <i>HINT1</i>    | Cytoplasm(GO:0005737)             | Nucleus(GO:0005634)          |                             |
| 4885417  | 04165 | <i>UBE2K</i>    | Cytoplasm(GO:0005737)             |                              |                             |
| 4885539  | 08908 | <i>PCMT1</i>    | Cytoplasm(GO:0005737)             |                              |                             |
| 4885585  | 18010 | <i>SAE1</i>     | Nucleus(GO:0005634)               |                              |                             |
| 4885649  | 11658 | <i>UBA2</i>     | -                                 |                              |                             |
| 49355721 | 06422 | <i>FAM162A</i>  | -                                 |                              |                             |
| 49472822 | 04886 | <i>EIF3G</i>    | Cytoplasm(GO:0005737)             |                              |                             |
| 49533617 | 00033 | <i>SOAT1</i>    | Endoplasmic reticulum(GO:0005783) | Nucleus(GO:0005634)          | Cytoplasm(GO:0005737)       |
| 49574508 | 08441 | <i>NAGK</i>     | -                                 |                              |                             |
| 50053795 | 04892 | <i>EIF4B</i>    | Cytoplasm(GO:0005737)             | Ribosome(GO:0005840)         |                             |
| 50053872 | 18000 | <i>RPL7L1</i>   | -                                 |                              |                             |
| 50301238 | 00704 | <i>GSR</i>      | Mitochondrion(GO:0005739)         | Cytoplasm(GO:0005737)        |                             |
| 5031573  | 05024 | <i>ACTR3</i>    | Cytoplasm(GO:0005737)             | Nucleolus(GO:0005730)        |                             |
| 5031595  | 10368 | <i>ARPC4</i>    | Cytoskeleton(GO:0005856)          | Nucleolus(GO:0005730)        |                             |
| 5031597  | 09175 | <i>ARPC3</i>    | Cytoplasm(GO:0005737)             | Nucleolus(GO:0005730)        |                             |
| 5031599  | 10367 | <i>ARPC2</i>    | Actin cytoskeleton(GO:0015629)    | Nucleolus(GO:0005730)        |                             |
| 5031611  | 16107 | <i>BET1</i>     | Golgi apparatus(GO:0005794)       | Cytoplasm(GO:0005737)        | Nucleus(GO:0005634)         |
| 5031635  | 03261 | <i>CFL1</i>     | Cytoplasm(GO:0005737)             | Cytosol(GO:0005829)          | Plasma membrane(GO:0005886) |
| 5031653  | 05777 | <i>BCAS2</i>    | Nucleus(GO:0005634)               |                              |                             |
| 5031691  | 09044 | <i>C21orf33</i> | Mitochondrion(GO:0005739)         |                              |                             |
| 5031699  | 06105 | <i>FLOT1</i>    | Plasma membrane(GO:0005886)       | Kinetochore(GO:0000776)      |                             |

|          |       |                |                                            |                             |                                         |
|----------|-------|----------------|--------------------------------------------|-----------------------------|-----------------------------------------|
| 5031703  | 06569 | <i>G3BP1</i>   | Cytosol(GO:0005829)                        | Plasma membrane(GO:0005886) | Cytoplasm(GO:0005737)                   |
| 5031741  | 07105 | <i>DNAJA2</i>  | Cytoplasm(GO:0005737)                      | Mitochondrion(GO:0005739)   | Microsome(GO:0005792)                   |
| 5031753  | 03021 | <i>HNRNPH1</i> | Nucleus(GO:0005634)                        | Cytoplasm(GO:0005737)       | Nucleolus(GO:0005730)                   |
| 5031755  | 06228 | <i>HNRNPR</i>  | Nucleus(GO:0005634)                        | Mitochondrion(GO:0005739)   | Nucleolus(GO:0005730)                   |
| 5031777  | 03094 | <i>IDH3A</i>   | Mitochondrion(GO:0005739)                  | Extracellular(GO:0005576)   |                                         |
| 5031789  | 03641 | <i>IMPA1</i>   | Cytoplasm(GO:0005737)                      |                             |                                         |
| 5031815  | 03249 | <i>KARS</i>    | Cytoplasm(GO:0005737)                      | Nucleus(GO:0005634)         | Plasma membrane(GO:0005886)             |
| 5031851  | 01047 | <i>STMN1</i>   | Cytoplasm(GO:0005737)                      |                             |                                         |
| 5031857  | 01025 | <i>LDHA</i>    | Cytoplasm(GO:0005737)                      | Cytosol(GO:0005829)         | Nucleolus(GO:0005730)                   |
| 5031875  | 01035 | <i>LMNA</i>    | Nucleus(GO:0005634)                        | Nucleolus(GO:0005730)       | Cytoplasm(GO:0005737)                   |
| 5031877  | 01036 | <i>LMNB1</i>   | Nucleus(GO:0005634)                        | Mitochondrion(GO:0005739)   | Cytoplasm(GO:0005737)                   |
| 5031887  | 02828 | <i>LPP</i>     | Cytoplasm(GO:0005737)                      | Plasma membrane(GO:0005886) | Nucleus(GO:0005634)                     |
| 5031931  | 03137 | <i>NACA</i>    | Nucleus(GO:0005634)                        | Ribosome(GO:0005840)        | Cytoplasm(GO:0005737)                   |
| 5031953  | 03067 | <i>ALG3</i>    | Endoplasmic reticulum membrane(GO:0005789) |                             |                                         |
| 5031973  | 07504 | <i>PDIA6</i>   | Endoplasmic reticulum(GO:0005783)          | Mitochondrion(GO:0005739)   | Endoplasmic reticulum lumen(GO:0005788) |
| 5031977  | 09938 | <i>NAMPT</i>   | Extracellular(GO:0005576)                  | Cytoplasm(GO:0005737)       | Nucleus(GO:0005634)                     |
| 5031981  | 06208 | <i>PSMD14</i>  | Cytoplasm(GO:0005737)                      | Nucleus(GO:0005634)         |                                         |
| 5031985  | 12050 | <i>NUTF2</i>   | Cytoplasm(GO:0005737)                      | Nucleus(GO:0005634)         |                                         |
| 5032027  | 04232 | <i>RBBP4</i>   | Nucleus(GO:0005634)                        | Mitochondrion(GO:0005739)   | Nucleolus(GO:0005730)                   |
| 5032057  | 04385 | <i>S100A11</i> | Cytoplasm(GO:0005737)                      | Endosome(GO:0005768)        | Nucleus(GO:0005634)                     |
| 5032087  | 06903 | <i>SF3A1</i>   | Nucleus(GO:0005634)                        |                             |                                         |
| 5032093  | 00173 | <i>SLC1A5</i>  | Plasma membrane(GO:0005886)                |                             |                                         |
| 5032161  | 02875 | <i>TCEB1</i>   | Nucleus(GO:0005634)                        |                             |                                         |
| 5032179  | 03445 | <i>TRIM28</i>  | Nucleus(GO:0005634)                        | Mitochondrion(GO:0005739)   | Nucleolus(GO:0005730)                   |
| 5032189  | 05569 | <i>TP53BP1</i> | Nucleus(GO:0005634)                        | Cytoplasm(GO:0005737)       |                                         |
| 50345984 | 01258 | <i>ATP5A1</i>  | Mitochondrion(GO:0005739)                  | Extracellular(GO:0005576)   | Zymogen granule(GO:0042588)             |
| 50345988 | 00156 | <i>ATP5C1</i>  | Mitochondrion(GO:0005739)                  |                             |                                         |
| 50346005 | 01385 | <i>PFKL</i>    | Cytoplasm(GO:0005737)                      |                             |                                         |
| 50348626 | 11376 | <i>MTUS1</i>   | Nucleus(GO:0005634)                        | Cytoplasm(GO:0005737)       | Plasma membrane(GO:0005886)             |
| 50428925 | 03196 | <i>TBCB</i>    | Cytoplasm(GO:0005737)                      |                             |                                         |
| 50428935 | 10461 | <i>MAP1S</i>   | Microtubule(GO:0005874)                    |                             |                                         |
| 50428938 | 03555 | <i>ASNA1</i>   | Cytoplasm(GO:0005737)                      | Nucleolus(GO:0005730)       | Nucleus(GO:0005634)                     |
| 50592988 | 01876 | <i>UQCRC2</i>  | Mitochondrion(GO:0005739)                  |                             |                                         |
| 50592994 | 01761 | <i>TXN</i>     | Cytoplasm(GO:0005737)                      | Nucleus(GO:0005634)         | Extracellular(GO:0005576)               |
| 50592996 | 04044 | <i>TUBB3</i>   | Cytoplasm(GO:0005737)                      |                             |                                         |
| 50593002 | 04629 | <i>SNRPA1</i>  | Nucleus(GO:0005634)                        | Nucleolus(GO:0005730)       |                                         |
| 50659095 | 05895 | <i>DDX21</i>   | Nucleolus(GO:0005730)                      | Nucleus(GO:0005634)         |                                         |
| 50727002 | 07914 | <i>PUS7</i>    | -                                          |                             |                                         |
| 50838795 | 12359 | <i>MTA3</i>    | Nucleus(GO:0005634)                        |                             |                                         |
| 50845388 | 01061 | <i>ANXA2</i>   | Nucleus(GO:0005634)                        | Nucleolus(GO:0005730)       | Plasma membrane(GO:0005886)             |
| 51093863 | 10804 | <i>FAM129B</i> | Nucleus(GO:0005634)                        |                             |                                         |

|          |       |                 |                                   |                                   |                                  |
|----------|-------|-----------------|-----------------------------------|-----------------------------------|----------------------------------|
| 51094101 | 13129 | <i>DDX54</i>    | Nucleolus(GO:0005730)             | Cytoplasm(GO:0005737)             | Nucleus(GO:0005634)              |
| 5123454  | 00774 | <i>HSPA1A</i>   | Cytoplasm(GO:0005737)             | Cytosol(GO:0005829)               | Nucleus(GO:0005634)              |
| 51242137 | 13188 | <i>TMEM200B</i> | Integral to membrane(GO:0016021)  |                                   |                                  |
| 51242945 | 18124 | <i>STRN</i>     | Cytoplasm(GO:0005737)             | Plasma membrane(GO:0005886)       |                                  |
| 51317370 | 11884 | <i>NDUFA6</i>   | Mitochondrion(GO:0005739)         |                                   |                                  |
| 51317376 | 03197 | <i>NHP2L1</i>   | Nucleolus(GO:0005730)             |                                   |                                  |
| 51317384 | 04536 | <i>GLE1</i>     | Nuclear membrane(GO:0005635)      | Cytoplasm(GO:0005737)             | Nucleoplasm(GO:0005654)          |
| 51477708 | 03206 | <i>HNRNPD</i>   | Nucleus(GO:0005634)               | Mitochondrion(GO:0005739)         | Cytoplasm(GO:0005737)            |
| 51479143 | 04399 | <i>ATP5J</i>    | Mitochondrion(GO:0005739)         | Extracellular(GO:0005576)         |                                  |
| 51479145 | 09163 | <i>ARFGEF1</i>  | Golgi apparatus(GO:0005794)       |                                   |                                  |
| 51479156 | 09815 | <i>ATP5L</i>    | Mitochondrion(GO:0005739)         |                                   |                                  |
| 51479160 | 03307 | <i>ATXN2</i>    | Cytoplasm(GO:0005737)             | Nucleus(GO:0005634)               |                                  |
| 51479173 | 09134 | <i>DNAH11</i>   | -                                 |                                   |                                  |
| 51599151 | 00240 | <i>CAPNS1</i>   | Cytoplasm(GO:0005737)             | Nucleus(GO:0005634)               | Plasma membrane(GO:0005886)      |
| 51599156 | 04472 | <i>CHD4</i>     | Cytoplasm(GO:0005737)             | Nucleus(GO:0005634)               | Nucleolus(GO:0005730)            |
| 5174389  | 00006 | <i>ACAT2</i>    | Cytoplasm(GO:0005737)             | Endoplasmic reticulum(GO:0005783) |                                  |
| 5174391  | 00069 | <i>AKR1A1</i>   | Cytoplasm(GO:0005737)             | Mitochondrion(GO:0005739)         | Plasma membrane(GO:0005886)      |
| 5174429  | 10380 | <i>ACAA2</i>    | Mitochondrion(GO:0005739)         |                                   |                                  |
| 5174431  | 02421 | <i>RPL10</i>    | Ribosome(GO:0005840)              | Nucleolus(GO:0005730)             | Cytoplasm(GO:0005737)            |
| 5174447  | 01503 | <i>GNB2L1</i>   | Cytoplasm(GO:0005737)             | Cytoskeleton(GO:0005856)          | Nucleus(GO:0005634)              |
| 5174449  | 04151 | <i>H1FX</i>     | Nucleus(GO:0005634)               | Nucleolus(GO:0005730)             | Mitochondrion(GO:0005739)        |
| 5174525  | 01139 | <i>MAP1B</i>    | Cytoplasm(GO:0005737)             | Nucleus(GO:0005634)               | Plasma membrane(GO:0005886)      |
| 5174529  | 03275 | <i>MAT2A</i>    | Cytoplasm(GO:0005737)             |                                   |                                  |
| 5174539  | 01100 | <i>MDH1</i>     | Cytoplasm(GO:0005737)             | Mitochondrion(GO:0005739)         | Cytosol(GO:0005829)              |
| 5174557  | 03789 | <i>MFGE8</i>    | Plasma membrane(GO:0005886)       | Extracellular(GO:0005576)         |                                  |
| 5174613  | 11873 | <i>NAP1L4</i>   | Nucleus(GO:0005634)               | Cytoplasm(GO:0005737)             |                                  |
| 5174731  | 04270 | <i>TSNAX</i>    | Cytoplasm(GO:0005737)             | Nucleus(GO:0005634)               |                                  |
| 5174735  | 04043 | <i>TUBB2C</i>   | Cytoplasm(GO:0005737)             | Nucleolus(GO:0005730)             | Microtubule(GO:0005874)          |
| 5174764  | 08863 | <i>MT2A</i>     | Nucleus(GO:0005634)               | Cytoplasm(GO:0005737)             |                                  |
| 51873031 | 07126 | <i>NCLN</i>     | Plasma membrane(GO:0005886)       |                                   |                                  |
| 51889724 | 11265 | <i>ALG11</i>    | -                                 |                                   |                                  |
| 51944969 | 12376 | <i>NOMO3</i>    | Integral to membrane(GO:0016021)  |                                   |                                  |
| 51944971 | 12375 | <i>NOMO2</i>    | -                                 |                                   |                                  |
| 52353966 | 16836 | <i>DPPA4</i>    | Nucleus(GO:0005634)               |                                   |                                  |
| 52426743 | 16759 | <i>LUC7L3</i>   | Nucleus(GO:0005634)               |                                   |                                  |
| 52487191 | 10290 | <i>ERP44</i>    | Endoplasmic reticulum(GO:0005783) |                                   |                                  |
| 52630432 | 04177 | <i>PKP2</i>     | Nucleus(GO:0005634)               | Desmosome(GO:0030057)             | Integral to membrane(GO:0016021) |
| 52630440 | 05327 | <i>FKBP8</i>    | Mitochondrion(GO:0005739)         | Nucleus(GO:0005634)               | Cytoplasm(GO:0005737)            |
| 52632383 | 04360 | <i>HNRNPL</i>   | Nucleus(GO:0005634)               | Cytoplasm(GO:0005737)             | Mitochondrion(GO:0005739)        |
| 52856421 | 14662 | <i>C17orf49</i> | Nucleus(GO:0005634)               |                                   |                                  |
| 5292161  | 03386 | <i>PSMD4</i>    | Cytoplasm(GO:0005737)             |                                   |                                  |

|          |       |                 |                                   |                                   |                             |
|----------|-------|-----------------|-----------------------------------|-----------------------------------|-----------------------------|
| 53692187 | 05023 | <i>ACTR2</i>    | Actin cytoskeleton(GO:0015629)    | Cytoplasm(GO:0005737)             |                             |
| 53759145 | 07276 | <i>GRSF1</i>    | Cytoplasm(GO:0005737)             | Nucleolus(GO:0005730)             | Mitochondrion(GO:0005739)   |
| 53793660 | 07887 | <i>FLJ20254</i> | -                                 |                                   |                             |
| 54020720 | 07515 | <i>HMGCS1</i>   | Cytoplasm(GO:0005737)             |                                   |                             |
| 54112117 | 09281 | <i>SF3B1</i>    | Nucleus(GO:0005634)               |                                   |                             |
| 54112121 | 12027 | <i>SF3B3</i>    | Nucleus(GO:0005634)               | Cytoplasm(GO:0005737)             |                             |
| 5453539  | 01401 | <i>PAICS</i>    | Nucleus(GO:0005634)               |                                   |                             |
| 5453549  | 05935 | <i>PRDX4</i>    | Cytoplasm(GO:0005737)             | Golgi apparatus(GO:0005794)       | Nucleus(GO:0005634)         |
| 5453555  | 03109 | <i>RAN</i>      | Nucleus(GO:0005634)               | Mitochondrion(GO:0005739)         | Cytoplasm(GO:0005737)       |
| 5453595  | 09869 | <i>CAP1</i>     | Cytoplasm(GO:0005737)             | Nucleus(GO:0005634)               |                             |
| 5453597  | 03347 | <i>CAPZA1</i>   | Cytoplasm(GO:0005737)             |                                   |                             |
| 5453599  | 11871 | <i>CAPZA2</i>   | Cytoskeleton(GO:0005856)          |                                   |                             |
| 5453601  | 16110 | <i>CRTAP</i>    | Cytoplasm(GO:0005737)             | Plasma membrane(GO:0005886)       |                             |
| 5453603  | 06895 | <i>CCT2</i>     | Cytoplasm(GO:0005737)             | Microtubule(GO:0005874)           | Mitochondrion(GO:0005739)   |
| 5453607  | 06896 | <i>CCT7</i>     | Cytoplasm(GO:0005737)             | Mitochondrion(GO:0005739)         | Microtubule(GO:0005874)     |
| 5453662  | 03214 | <i>GCS1</i>     | Endoplasmic reticulum(GO:0005783) | Mitochondrion(GO:0005739)         | Cytoplasm(GO:0005737)       |
| 5453690  | 05198 | <i>DNAJB1</i>   | Cytoplasm(GO:0005737)             | Endoplasmic reticulum(GO:0005783) | Cytosol(GO:0005829)         |
| 5453710  | 04229 | <i>LASP1</i>    | Focal adhesion(GO:0005925)        | Cytosol(GO:0005829)               | Cytoskeleton(GO:0005856)    |
| 5453740  | 14735 | <i>MYL12A</i>   | Cytoskeleton(GO:0005856)          |                                   |                             |
| 5453760  | 04412 | <i>NEDD8</i>    | Nucleus(GO:0005634)               | Cytoplasm(GO:0005737)             |                             |
| 5453832  | 03448 | <i>HYOU1</i>    | Endoplasmic reticulum(GO:0005783) | Mitochondrion(GO:0005739)         | Cytoplasm(GO:0005737)       |
| 5453854  | 03128 | <i>PCBP1</i>    | Nucleus(GO:0005634)               | Nucleolus(GO:0005730)             | Mitochondrion(GO:0005739)   |
| 5453880  | 09014 | <i>ANP32A</i>   | Nucleus(GO:0005634)               | Plasma membrane(GO:0005886)       | Cytoplasm(GO:0005737)       |
| 5453898  | 03031 | <i>PIN1</i>     | Nucleus(GO:0005634)               | Cytoplasm(GO:0005737)             |                             |
| 5453918  | 08425 | <i>SLC25A17</i> | Peroxisome(GO:0005777)            |                                   |                             |
| 5453954  | 09039 | <i>PPP2R5D</i>  | Nucleus(GO:0005634)               | Cytoplasm(GO:0005737)             | Microtubule(GO:0005874)     |
| 5453958  | 02805 | <i>PPP5C</i>    | Nucleus(GO:0005634)               | Plasma membrane(GO:0005886)       | Cytoplasm(GO:0005737)       |
| 5453990  | 02803 | <i>PSME1</i>    | Nucleus(GO:0005634)               | Cytoplasm(GO:0005737)             |                             |
| 5453998  | 09280 | <i>IPO7</i>     | Nucleus(GO:0005634)               |                                   |                             |
| 5454002  | 06707 | <i>C6orf108</i> | Nucleus(GO:0005634)               | Cytoplasm(GO:0005737)             |                             |
| 5454064  | 11485 | <i>RBM14</i>    | Nucleus(GO:0005634)               | Cytoplasm(GO:0005737)             | Nucleolus(GO:0005730)       |
| 5454088  | 09803 | <i>ANP32B</i>   | Nucleus(GO:0005634)               | Cytoplasm(GO:0005737)             | Nucleolus(GO:0005730)       |
| 5454090  | 02101 | <i>SSR4</i>     | Endoplasmic reticulum(GO:0005783) | Mitochondrion(GO:0005739)         | Microsome(GO:0005792)       |
| 5454154  | 12084 | <i>PIIH</i>     | Nucleus(GO:0005634)               | Nucleolus(GO:0005730)             | Cytoplasm(GO:0005737)       |
| 5454158  | 10362 | <i>VAR5</i>     | -                                 |                                   |                             |
| 54607035 | 00946 | <i>ITGB4</i>    | Integral to membrane(GO:0016021)  | Nucleus(GO:0005634)               |                             |
| 54607053 | 16127 | <i>GCN1L1</i>   | Nucleolus(GO:0005730)             | Nucleus(GO:0005634)               |                             |
| 54607074 | 10754 | <i>C21orf57</i> | -                                 |                                   |                             |
| 54607135 | 16194 | <i>TOMM70A</i>  | Mitochondrion(GO:0005739)         |                                   |                             |
| 54633312 | 02855 | <i>GLG1</i>     | Golgi apparatus(GO:0005794)       | Mitochondrion(GO:0005739)         | Plasma membrane(GO:0005886) |
| 54792065 | 03554 | <i>SUMO1</i>    | Cytoplasm(GO:0005737)             | Microtubule(GO:0005874)           | Nucleus(GO:0005634)         |



|          |       |                 |                                  |                               |                             |
|----------|-------|-----------------|----------------------------------|-------------------------------|-----------------------------|
| 54792071 | 04332 | <i>SUMO2</i>    | Nucleus(GO:0005634)              | Nuclear membrane(GO:0005635)  | Cytoplasm(GO:0005737)       |
| 54859722 | 16254 | <i>NUP160</i>   | Nucleus(GO:0005634)              | Nuclear membrane(GO:0005635)  |                             |
| 54873600 | 03558 | <i>MANF</i>     | Cytoplasm(GO:0005737)            | Nucleolus(GO:0005730)         | Nucleus(GO:0005634)         |
| 54873624 | 11739 | <i>EIF2A</i>    | Cytoplasm(GO:0005737)            |                               |                             |
| 55741709 | 15229 | <i>RBM25</i>    | Nucleus(GO:0005634)              |                               |                             |
| 55743075 | 04600 | <i>AAMP</i>     | Extracellular(GO:0005576)        |                               |                             |
| 55743130 | 17995 | <i>RPL32</i>    | Ribosome(GO:0005840)             |                               |                             |
| 55743134 | 03402 | <i>RPS6KA1</i>  | Cytosol(GO:0005829)              | Membrane fraction(GO:0005624) | Nucleus(GO:0005634)         |
| 55749531 | 10410 | <i>SF3B2</i>    | Nucleus(GO:0005634)              | Cytoplasm(GO:0005737)         | Nucleolus(GO:0005730)       |
| 55749689 | 17207 | <i>SAPS1</i>    | Cytoplasm(GO:0005737)            |                               |                             |
| 55770844 | 00285 | <i>CTNNA1</i>   | Cytoplasm(GO:0005737)            | Cell junction(GO:0030054)     | Plasma membrane(GO:0005886) |
| 55770858 | 04936 | <i>GOSR1</i>    | Golgi apparatus(GO:0005794)      | Nucleus(GO:0005634)           |                             |
| 55770864 | 09168 | <i>THOC4</i>    | Nucleus(GO:0005634)              | Mitochondrion(GO:0005739)     | Nucleolus(GO:0005730)       |
| 55770900 | 16563 | <i>BRX1</i>     | Nucleolus(GO:0005730)            | Ribosome(GO:0005840)          | Nucleus(GO:0005634)         |
| 55770904 | 17942 | <i>QSCN6L1</i>  | Plasma membrane(GO:0005886)      | Cytoplasm(GO:0005737)         | Nucleus(GO:0005634)         |
| 55925576 | 00898 | <i>IGFBP2</i>   | Extracellular(GO:0005576)        |                               |                             |
| 55953087 | 09976 | <i>GTPBP4</i>   | Nucleus(GO:0005634)              | Ribosome(GO:0005840)          | Nucleolus(GO:0005730)       |
| 55956788 | 01245 | <i>NCL</i>      | Nucleolus(GO:0005730)            | Cytoplasm(GO:0005737)         | Plasma membrane(GO:0005886) |
| 55956921 | 04067 | <i>HNRNPAB</i>  | Nucleolus(GO:0005730)            | Nucleus(GO:0005634)           |                             |
| 56117838 | 09165 | <i>SFRP1</i>    | Extracellular(GO:0005576)        |                               |                             |
| 56117852 | 15949 | <i>CSDE1</i>    | Cytoplasm(GO:0005737)            |                               |                             |
| 56119207 | 01554 | <i>EPHA1</i>    | Plasma membrane(GO:0005886)      | Extracellular(GO:0005576)     |                             |
| 56237027 | 09752 | <i>IGF2BP1</i>  | Cytoplasm(GO:0005737)            | Nucleus(GO:0005634)           |                             |
| 56549125 | 03852 | <i>DNM2</i>     | Cytoskeleton(GO:0005856)         | Cell surface(GO:0009986)      | Mitochondrion(GO:0005739)   |
| 56549640 | 03297 | <i>SEPT2</i>    | Cytoplasm(GO:0005737)            | Nucleus(GO:0005634)           | Nucleolus(GO:0005730)       |
| 56549656 | 12690 | <i>C18orf25</i> | Nucleus(GO:0005634)              | Cytoplasm(GO:0005737)         |                             |
| 56549694 | 12360 | <i>ENAH</i>     | Nucleus(GO:0005634)              | Cytoplasm(GO:0005737)         | Plasma membrane(GO:0005886) |
| 56605983 | 10424 | <i>NIF3L1</i>   | Nucleus(GO:0005634)              | Cytoplasm(GO:0005737)         |                             |
| 56606000 | 17416 | <i>GPX8</i>     | Integral to membrane(GO:0016021) |                               |                             |
| 56676335 | 10603 | <i>RIF1</i>     | Nucleus(GO:0005634)              |                               |                             |
| 56676371 | 05823 | <i>CPSF1</i>    | Nucleus(GO:0005634)              |                               |                             |
| 56682959 | 00615 | <i>FTH1</i>     | Cytoplasm(GO:0005737)            |                               |                             |
| 56687498 | 17202 | <i>DNAJC16</i>  | -                                |                               |                             |
| 56699409 | 02186 | <i>RBMX</i>     | Nucleus(GO:0005634)              | Nucleolus(GO:0005730)         |                             |
| 56699482 | 16808 | <i>FAM98A</i>   | -                                |                               |                             |
| 56711308 | 17054 | <i>GPR107</i>   | Plasma membrane(GO:0005886)      |                               |                             |
| 56713254 | 13752 | <i>CCBL2</i>    | -                                |                               |                             |
| 56713256 | 13752 | <i>CCBL2</i>    | -                                |                               |                             |
| 56790945 | 15942 | <i>PPP1CA</i>   | Cytoskeleton(GO:0005856)         | Microtubule(GO:0005874)       | Mitochondrion(GO:0005739)   |
| 56847620 | 17521 | <i>BTF3L4</i>   | -                                |                               |                             |
| 56961676 | 15952 | <i>ZNF121</i>   | Nucleus(GO:0005634)              |                               |                             |

|          |       |                 |                                   |                               |                             |
|----------|-------|-----------------|-----------------------------------|-------------------------------|-----------------------------|
| 57013276 | 03960 | <i>TUBA1B</i>   | Plasma membrane(GO:0005886)       | Cytoplasm(GO:0005737)         | Mitochondrion(GO:0005739)   |
| 57164971 | 11870 | <i>RBPMS</i>    | -                                 |                               |                             |
| 57164977 | 06026 | <i>TCOF1</i>    | Nucleolus(GO:0005730)             | Cytoplasm(GO:0005737)         | Nucleus(GO:0005634)         |
| 57165424 | 07218 | <i>CUL4A</i>    | Cytoplasm(GO:0005737)             | Nucleus(GO:0005634)           |                             |
| 57222563 | 10830 | <i>CKAP5</i>    | Centrosome(GO:0005813)            | Microtubule(GO:0005874)       | Mitochondrion(GO:0005739)   |
| 57242800 | 15405 | <i>SMPDL3B</i>  | -                                 |                               |                             |
| 5729730  | 16500 | <i>API5</i>     | Nucleus(GO:0005634)               | Cytoplasm(GO:0005737)         | Nucleolus(GO:0005730)       |
| 5729770  | 06415 | <i>TPP1</i>     | Lysosome(GO:0005764)              | Nucleus(GO:0005634)           |                             |
| 5729779  | 16737 | <i>COPS8</i>    | Cytoplasm(GO:0005737)             |                               |                             |
| 5729812  | 02615 | <i>ELL</i>      | Nucleus(GO:0005634)               |                               |                             |
| 5729850  | 00765 | <i>GNAI3</i>    | Plasma membrane(GO:0005886)       | Cytoplasm(GO:0005737)         |                             |
| 5729875  | 02338 | <i>PGRMC1</i>   | Plasma membrane(GO:0005886)       |                               |                             |
| 5729877  | 07205 | <i>HSPA8</i>    | Nucleolus(GO:0005730)             | Mitochondrion(GO:0005739)     | Cytoplasm(GO:0005737)       |
| 5729953  | 10122 | <i>NUDC</i>     | Cytoplasm(GO:0005737)             | Nucleus(GO:0005634)           |                             |
| 5730023  | 16070 | <i>RUVBL2</i>   | Nucleus(GO:0005634)               | Nucleolus(GO:0005730)         | Chromosome(GO:0005694)      |
| 5730027  | 03926 | <i>KHDRBS1</i>  | Nucleus(GO:0005634)               | Nucleolus(GO:0005730)         | Cytoplasm(GO:0005737)       |
| 5730031  | 06073 | <i>SCAMP2</i>   | Plasma membrane(GO:0005886)       | Secretory granule(GO:0030141) | Cytoplasm(GO:0005737)       |
| 5730041  | 09160 | <i>SUGT1</i>    | Nucleus(GO:0005634)               |                               |                             |
| 5730045  | 02106 | <i>SLC16A2</i>  | Plasma membrane(GO:0005886)       |                               |                             |
| 5730051  | 00683 | <i>SLC2A1</i>   | Plasma membrane(GO:0005886)       | Golgi apparatus(GO:0005794)   | Cytoplasm(GO:0005737)       |
| 5730079  | 05562 | <i>SFRS13A</i>  | Nucleolus(GO:0005730)             | Cytoplasm(GO:0005737)         | Nucleoplasm(GO:0005654)     |
| 5730120  | 16205 | <i>YKT6</i>     | Endoplasmic reticulum(GO:0005783) | Golgi apparatus(GO:0005794)   |                             |
| 57634534 | 17653 | <i>NUP205</i>   | Nucleus(GO:0005634)               | Nuclear membrane(GO:0005635)  |                             |
| 57863257 | 01748 | <i>TCP1</i>     | Cytoplasm(GO:0005737)             | Cytosol(GO:0005829)           | Microtubule(GO:0005874)     |
| 57863269 | 10009 | <i>RRP1B</i>    | Nucleolus(GO:0005730)             | Nucleus(GO:0005634)           |                             |
| 57863271 | 17194 | <i>KIAA0564</i> | -                                 |                               |                             |
| 5802974  | 05305 | <i>PRDX3</i>    | Mitochondrion(GO:0005739)         |                               |                             |
| 5803011  | 00573 | <i>ENO2</i>     | Cytoplasm(GO:0005737)             |                               |                             |
| 5803013  | 03794 | <i>ERP29</i>    | Endoplasmic reticulum(GO:0005783) | Mitochondrion(GO:0005739)     |                             |
| 5803023  | 17285 | <i>LMAN2</i>    | Golgi apparatus(GO:0005794)       | Mitochondrion(GO:0005739)     | Cytoplasm(GO:0005737)       |
| 5803036  | 17112 | <i>HNRNPA0</i>  | Nucleus(GO:0005634)               | Mitochondrion(GO:0005739)     | Nucleolus(GO:0005730)       |
| 5803076  | 05149 | <i>CBX1</i>     | Nucleus(GO:0005634)               | Cytoplasm(GO:0005737)         | Nucleolus(GO:0005730)       |
| 5803082  | 05172 | <i>KIF2C</i>    | Cytoplasm(GO:0005737)             | Nucleolus(GO:0005730)         | Kinetochores(GO:0000776)    |
| 5803092  | 03522 | <i>METAP2</i>   | -                                 |                               |                             |
| 5803111  | 16849 | <i>EBNA1BP2</i> | Nucleolus(GO:0005730)             | Nucleus(GO:0005634)           |                             |
| 5803115  | 02658 | <i>IMMT</i>     | Mitochondrion(GO:0005739)         |                               |                             |
| 5803141  | 11870 | <i>RBPMS</i>    | -                                 |                               |                             |
| 5803167  | 10411 | <i>SF3A3</i>    | Nucleus(GO:0005634)               | Nucleolus(GO:0005730)         |                             |
| 5803181  | 05454 | <i>STIP1</i>    | Nucleus(GO:0005634)               | Cytoplasm(GO:0005737)         | Golgi apparatus(GO:0005794) |
| 5803187  | 03640 | <i>TALDO1</i>   | Nucleus(GO:0005634)               |                               |                             |
| 5803191  | 03252 | <i>TCEA1</i>    | Nucleus(GO:0005634)               | Cytoplasm(GO:0005737)         | Nucleolus(GO:0005730)       |

|          |       |         |                                    |                                   |                                |
|----------|-------|---------|------------------------------------|-----------------------------------|--------------------------------|
| 5803221  | 16066 | WDR3    | Nucleus(GO:0005634)                | Nucleolus(GO:0005730)             |                                |
| 5803225  | 05457 | YWHAE   | Cytoplasm(GO:0005737)              | Golgi apparatus(GO:0005794)       | Nucleolus(GO:0005730)          |
| 5803227  | 00886 | YWHAQ   | Cytoplasm(GO:0005737)              | Cytosol(GO:0005829)               | Nucleus(GO:0005634)            |
| 58037537 | 11174 | EARS2   | -                                  |                                   |                                |
| 58331218 | 10665 | SRRT    | Nucleus(GO:0005634)                |                                   |                                |
| 58530845 | 03592 | ZYX     | Plasma membrane(GO:0005886)        | Cytoplasm(GO:0005737)             | Nucleus(GO:0005634)            |
| 58530871 | 02167 | MAGEA4  | Cytoplasm(GO:0005737)              | Nucleus(GO:0005634)               |                                |
| 58535461 | 04398 | SEPT7   | Cytoskeleton(GO:0005856)           | Mitochondrion(GO:0005739)         | Nucleus(GO:0005634)            |
| 58615666 | 02470 | COX2    | Mitochondrion(GO:0005739)          |                                   |                                |
| 58761500 | 15194 | OLA1    | Nucleolus(GO:0005730)              |                                   |                                |
| 58761546 | 09800 | KDM1A   | Nucleus(GO:0005634)                | Cytoplasm(GO:0005737)             |                                |
| 5901892  | 10483 | WDHD1   | Nucleus(GO:0005634)                | Cytoplasm(GO:0005737)             |                                |
| 5901912  | 00241 | CALM1   | Cytoplasm(GO:0005737)              | Nucleus(GO:0005634)               | Plasma membrane(GO:0005886)    |
| 5901922  | 05456 | CDC37   | Cytoplasm(GO:0005737)              |                                   |                                |
| 5901926  | 05400 | NUDT21  | Nucleus(GO:0005634)                | Nucleolus(GO:0005730)             |                                |
| 5901928  | 05401 | CPSF6   | Nucleus(GO:0005634)                |                                   |                                |
| 5901940  | 04209 | DNMT3B  | Nucleus(GO:0005634)                |                                   |                                |
| 5902034  | 11464 | PWP1    | Nucleus(GO:0005634)                | Endoplasmic reticulum(GO:0005783) | Nucleolus(GO:0005730)          |
| 5902076  | 02887 | SFRS1   | Nucleus(GO:0005634)                | Nucleolus(GO:0005730)             | Cytoplasm(GO:0005737)          |
| 5902090  | 00686 | SLC2A3  | Plasma membrane(GO:0005886)        |                                   |                                |
| 5902102  | 03040 | SNRPD1  | Nucleus(GO:0005634)                | Cytoplasm(GO:0005737)             |                                |
| 5902146  | 05717 | UBE2C   | Nucleus(GO:0005634)                |                                   |                                |
| 6005721  | 15437 | ERLIN2  | -                                  |                                   |                                |
| 6005757  | 16088 | SUPT16H | Nucleus(GO:0005634)                | Cytoplasm(GO:0005737)             |                                |
| 6005842  | 16060 | PROSC   | Cytoplasm(GO:0005737)              |                                   |                                |
| 6005854  | 17843 | PHB2    | Nucleus(GO:0005634)                | Cytosol(GO:0005829)               | Mitochondrion(GO:0005739)      |
| 6005872  | 09783 | SEC63   | Endoplasmic reticulum(GO:0005783)  | Mitochondrion(GO:0005739)         |                                |
| 6005942  | 03013 | VCP     | Perinuclear region(GO:0048471)     | Nucleus(GO:0005634)               | Nucleolus(GO:0005730)          |
| 6005993  | 00351 | CLTA    | Cytoplasm(GO:0005737)              | Cell surface(GO:0009986)          | Perinuclear region(GO:0048471) |
| 60279268 | 01872 | U2AF2   | Nucleus(GO:0005634)                | Nucleolus(GO:0005730)             | Cytoplasm(GO:0005737)          |
| 6031192  | 02654 | SLC25A3 | Mitochondrial membrane(GO:0005740) |                                   |                                |
| 60498992 | 10600 | FOXP4   | Nucleus(GO:0005634)                |                                   |                                |
| 60499001 | 17853 | PIPOX   | Peroxisome(GO:0005777)             |                                   |                                |
| 61676188 | 06608 | HUWE1   | Nucleus(GO:0005634)                | Cytoplasm(GO:0005737)             |                                |
| 61743954 | 14684 | AHNAK   | Nucleus(GO:0005634)                | Cytoskeleton(GO:0005856)          | Plasma membrane(GO:0005886)    |
| 61743971 | 15319 | SEH1L   | Kinetochores(GO:0000776)           | Nuclear membrane(GO:0005635)      |                                |
| 61835148 | 02892 | FXR1    | Nucleolus(GO:0005730)              | Cytoplasm(GO:0005737)             | Nucleus(GO:0005634)            |
| 61835172 | 02892 | FXR1    | Nucleolus(GO:0005730)              | Cytoplasm(GO:0005737)             | Nucleus(GO:0005634)            |
| 62240992 | 00464 | CARS    | Cytoplasm(GO:0005737)              |                                   |                                |
| 62241042 | 00703 | EPRS    | Cytoplasm(GO:0005737)              | Nucleus(GO:0005634)               |                                |
| 62244044 | 14873 | OCIAD2  | -                                  |                                   |                                |

|          |       |                  |                                            |                                   |                                   |
|----------|-------|------------------|--------------------------------------------|-----------------------------------|-----------------------------------|
| 62414289 | 01899 | <i>VIM</i>       | Intermediate filament(GO:0005882)          | Endoplasmic reticulum(GO:0005783) | Extracellular(GO:0005576)         |
| 62420875 | 03842 | <i>ILK</i>       | Cytoplasm(GO:0005737)                      | Microsome(GO:0005792)             | Nucleus(GO:0005634)               |
| 62460637 | 07022 | <i>IPO4</i>      | Cytoplasm(GO:0005737)                      | Nucleus(GO:0005634)               |                                   |
| 62530384 | 02628 | <i>DCI</i>       | Mitochondrion(GO:0005739)                  |                                   |                                   |
| 6274552  | 02777 | <i>STAT1</i>     | Cytoplasm(GO:0005737)                      | Nucleus(GO:0005634)               |                                   |
| 62750354 | 05270 | <i>MATR3</i>     | Nucleus(GO:0005634)                        | Cytoplasm(GO:0005737)             | Mitochondrion(GO:0005739)         |
| 62859987 | 10469 | <i>SFRS14</i>    | Nucleus(GO:0005634)                        |                                   |                                   |
| 62865635 | 11802 | <i>SQLE</i>      | Endoplasmic reticulum(GO:0005783)          |                                   |                                   |
| 62865890 | 04349 | <i>DUSP5</i>     | Nucleus(GO:0005634)                        |                                   |                                   |
| 62912457 | 00696 | <i>ALDH18A1</i>  | Mitochondrion(GO:0005739)                  |                                   |                                   |
| 62955042 | 18703 | <i>PARD6B</i>    | Plasma membrane(GO:0005886)                |                                   |                                   |
| 62988276 | 18711 | <i>KIAA0391</i>  | Mitochondrion(GO:0005739)                  |                                   |                                   |
| 63029937 | 00777 | <i>HSP90AA1</i>  | Cytoplasm(GO:0005737)                      | Extracellular space(GO:0005615)   | Microtubule(GO:0005874)           |
| 63055043 | 18605 | <i>TMEM205</i>   | Integral to membrane(GO:0016021)           |                                   |                                   |
| 63162572 | 08969 | <i>CCT3</i>      | Cytoplasm(GO:0005737)                      | Nucleolus(GO:0005730)             | Microtubule(GO:0005874)           |
| 63252886 | 08901 | <i>P4HA1</i>     | Endoplasmic reticulum(GO:0005783)          |                                   |                                   |
| 63252888 | 08901 | <i>P4HA1</i>     | Endoplasmic reticulum(GO:0005783)          |                                   |                                   |
| 63252896 | 01839 | <i>TPM1</i>      | Actin cytoskeleton(GO:0015629)             | Perinuclear region(GO:0048471)    | Cytoplasm(GO:0005737)             |
| 63252900 | 01839 | <i>TPM1</i>      | Actin cytoskeleton(GO:0015629)             | Perinuclear region(GO:0048471)    | Cytoplasm(GO:0005737)             |
| 63253298 | 01692 | <i>SRM</i>       | Cytoplasm(GO:0005737)                      |                                   |                                   |
| 6382079  | 03111 | <i>RANBP2</i>    | Nucleus(GO:0005634)                        | Kinetochore(GO:0000776)           | Cytoplasm(GO:0005737)             |
| 64085377 | 10507 | <i>IGF2BP2</i>   | Cytoplasm(GO:0005737)                      | Cytoskeleton(GO:0005856)          |                                   |
| 64762484 | 06465 | <i>BRCC3</i>     | -                                          |                                   |                                   |
| 65506891 | 01148 | <i>SLC3A2</i>    | Nucleus(GO:0005634)                        | Plasma membrane(GO:0005886)       | Cytoplasm(GO:0005737)             |
| 6552328  | 08942 | <i>CYB5R3</i>    | Cytoplasm(GO:0005737)                      | Plasma membrane(GO:0005886)       | Endoplasmic reticulum(GO:0005783) |
| 65787364 | 16743 | <i>CORO1B</i>    | -                                          |                                   |                                   |
| 6598323  | 02863 | <i>GDI2</i>      | Cytoplasm(GO:0005737)                      | Endoplasmic reticulum(GO:0005783) | Centrosome(GO:0005813)            |
| 66277202 | 04025 | <i>PODXL</i>     | Integral to membrane(GO:0016021)           |                                   |                                   |
| 6631095  | 04072 | <i>MCM3</i>      | Nucleus(GO:0005634)                        | Chromosome(GO:0005694)            | Mitochondrion(GO:0005739)         |
| 66346683 | 09570 | <i>SERBP1</i>    | Cytoplasm(GO:0005737)                      | Nucleus(GO:0005634)               |                                   |
| 66346685 | 09570 | <i>SERBP1</i>    | Cytoplasm(GO:0005737)                      | Nucleus(GO:0005634)               |                                   |
| 66363688 | 04545 | <i>NAE1</i>      | Cytoplasm(GO:0005737)                      |                                   |                                   |
| 66528888 | 01968 | <i>FANCD2</i>    | Nucleus(GO:0005634)                        | Mitochondrion(GO:0005739)         |                                   |
| 66529396 | 03903 | <i>PON2</i>      | Plasma membrane(GO:0005886)                |                                   |                                   |
| 66737374 | 03586 | <i>S100A13</i>   | Nucleus(GO:0005634)                        | Nucleolus(GO:0005730)             | Perinuclear region(GO:0048471)    |
| 6678271  | 05466 | <i>TARDBP</i>    | Nucleus(GO:0005634)                        |                                   |                                   |
| 6681764  | 04832 | <i>NDUFA9</i>    | Mitochondrion(GO:0005739)                  |                                   |                                   |
| 66879664 | 00054 | <i>ARF1</i>      | Golgi apparatus(GO:0005794)                | Plasma membrane(GO:0005886)       | Endosome(GO:0005768)              |
| 66912162 | 18639 | <i>HIST2H2BF</i> | Nucleus(GO:0005634)                        |                                   |                                   |
| 66932916 | 01496 | <i>MAPK1</i>     | Cytoplasm(GO:0005737)                      | Nucleus(GO:0005634)               |                                   |
| 66933005 | 00252 | <i>CANX</i>      | Endoplasmic reticulum membrane(GO:0005783) | Lysosome(GO:0005764)              | Mitochondrion(GO:0005739)         |

|          |       |                   |                                   |                                   |                                    |
|----------|-------|-------------------|-----------------------------------|-----------------------------------|------------------------------------|
| 66933016 | 00895 | <i>IMPDH2</i>     | Cytosol(GO:0005829)               | Cytoplasm(GO:0005737)             |                                    |
| 67089147 | 01694 | <i>FDFT1</i>      | Endoplasmic reticulum(GO:0005783) | Extracellular(GO:0005576)         |                                    |
| 67189747 | 04745 | <i>RPL6</i>       | Nucleolus(GO:0005730)             | Ribosome(GO:0005840)              | Mitochondrion(GO:0005739)          |
| 6754472  | 05455 | <i>KIF23</i>      | Nucleus(GO:0005634)               | Microtubule(GO:0005874)           | Cytoplasm(GO:0005737)              |
| 67944630 | 04732 | <i>RPL9</i>       | Ribosome(GO:0005840)              | Nucleolus(GO:0005730)             | Mitochondrion(GO:0005739)          |
| 68051721 | 07489 | <i>NCEH1</i>      | -                                 |                                   |                                    |
| 68160922 | 00562 | <i>RPS14</i>      | Ribosome(GO:0005840)              | Cytoplasm(GO:0005737)             | Nucleolus(GO:0005730)              |
| 68226422 | 18071 | <i>YIPF5</i>      | Golgi apparatus(GO:0005794)       |                                   |                                    |
| 68299795 | 03668 | <i>CHD1</i>       | Nucleus(GO:0005634)               | Cytoplasm(GO:0005737)             |                                    |
| 68509926 | 04553 | <i>DHX15</i>      | Nucleus(GO:0005634)               | Nucleolus(GO:0005730)             |                                    |
| 68799814 | 03014 | <i>AP2M1</i>      | Plasma membrane(GO:0005886)       |                                   |                                    |
| 68800128 | 01871 | <i>U2AF1</i>      | Nucleus(GO:0005634)               | Cytoplasm(GO:0005737)             | Nucleoplasm(GO:0005654)            |
| 6912238  | 05958 | <i>PRDX5</i>      | Mitochondrion(GO:0005739)         | Cytoplasm(GO:0005737)             | Lysosome(GO:0005764)               |
| 6912240  | 16496 | <i>AP3M1</i>      | Golgi apparatus(GO:0005794)       | Lysosome(GO:0005764)              | Cytoplasm(GO:0005737)              |
| 6912280  | 09768 | <i>AHSA1</i>      | Cytoplasm(GO:0005737)             | Endoplasmic reticulum(GO:0005783) |                                    |
| 6912292  | 05131 | <i>CBX5</i>       | Nucleus(GO:0005634)               | Chromosome(GO:0005694)            | Cytoplasm(GO:0005737)              |
| 6912328  | 09203 | <i>DDAH1</i>      | Cytoplasm(GO:0005737)             | Integral to membrane(GO:0016021)  |                                    |
| 6912388  | 06122 | <i>GCA</i>        | Cytoplasm(GO:0005737)             | Plasma membrane(GO:0005886)       |                                    |
| 6912398  | 11997 | <i>GTF3C3</i>     | Nucleus(GO:0005634)               |                                   |                                    |
| 6912400  | 11998 | <i>GTF3C4</i>     | Nucleus(GO:0005634)               |                                   |                                    |
| 6912464  | 06116 | <i>LPHN2</i>      | Plasma membrane(GO:0005886)       |                                   |                                    |
| 6912494  | 04379 | <i>MAPRE1</i>     | Centrosome(GO:0005813)            | Cytoplasm(GO:0005737)             |                                    |
| 6912586  | 12001 | <i>PGLS</i>       | -                                 |                                   |                                    |
| 6912598  | 02686 | <i>NT5C2</i>      | Cytoplasm(GO:0005737)             |                                   |                                    |
| 6912616  | 13623 | <i>H2AFV</i>      | Nucleus(GO:0005634)               |                                   |                                    |
| 6912734  | 18209 | <i>TNPO3</i>      | Nucleus(GO:0005634)               |                                   |                                    |
| 69354671 | 09139 | <i>ABCF1</i>      | Ribosome(GO:0005840)              | Nucleus(GO:0005634)               | Cytoplasm(GO:0005737)              |
| 6996005  | 04833 | <i>DNM1L</i>      | Cytoplasm(GO:0005737)             | Endoplasmic reticulum(GO:0005783) | Golgi apparatus(GO:0005794)        |
| 70166852 | 07528 | <i>ADAR</i>       | Nucleus(GO:0005634)               | Cytoplasm(GO:0005737)             | Nucleolus(GO:0005730)              |
| 7019333  | 05819 | <i>NRBP1</i>      | Nucleus(GO:0005634)               | Plasma membrane(GO:0005886)       | Cytoplasm(GO:0005737)              |
| 7019415  | 15316 | <i>SEC61A1</i>    | Endoplasmic reticulum(GO:0005783) | Integral to membrane(GO:0016021)  | Golgi apparatus(GO:0005794)        |
| 7019419  | 11006 | <i>GNL2</i>       | Nucleolus(GO:0005730)             | Nucleus(GO:0005634)               | Ribosome(GO:0005840)               |
| 7019485  | 03035 | <i>PDCD6</i>      | Cytoplasm(GO:0005737)             | Nucleolus(GO:0005730)             | Nucleoplasm(GO:0005654)            |
| 7019569  | 11676 | <i>VPS4A</i>      | Cytoplasm(GO:0005737)             | Perinuclear region(GO:0048471)    |                                    |
| 70608086 | 18825 | <i>HIST2H3PS2</i> | -                                 |                                   |                                    |
| 70780359 | 01693 | <i>ANK1</i>       | Plasma membrane(GO:0005886)       | Integral to membrane(GO:0016021)  | Sarcoplasmic reticulum(GO:0016529) |
| 70906441 | 03165 | <i>DUT</i>        | Mitochondrion(GO:0005739)         | Cytoplasm(GO:0005737)             | Nucleus(GO:0005634)                |
| 70980549 | 18752 | <i>PDCD11</i>     | Nucleus(GO:0005634)               | Cytoplasm(GO:0005737)             |                                    |
| 70995422 | 00518 | <i>NQO1</i>       | Mitochondrion(GO:0005739)         | Plasma membrane(GO:0005886)       | Cytoplasm(GO:0005737)              |
| 71037379 | 01987 | <i>PYGL</i>       | -                                 |                                   |                                    |
| 71043876 | 11964 | <i>UTF1</i>       | Nucleus(GO:0005634)               |                                   |                                    |

|          |       |                 |                                    |                                  |                             |
|----------|-------|-----------------|------------------------------------|----------------------------------|-----------------------------|
| 71051616 | 01441 | <i>UROD</i>     | Cytoplasm(GO:0005737)              |                                  |                             |
| 71143137 | 02181 | <i>HMGB3</i>    | Nucleus(GO:0005634)                |                                  |                             |
| 71164871 | 03046 | <i>CUGBP1</i>   | Nucleus(GO:0005634)                | Cytoplasm(GO:0005737)            |                             |
| 71274107 | 01120 | <i>MCAM</i>     | Plasma membrane(GO:0005886)        | Cytoplasm(GO:0005737)            | Nucleus(GO:0005634)         |
| 71361682 | 01236 | <i>NUMA1</i>    | Nucleus(GO:0005634)                | Cytoplasm(GO:0005737)            | Cytosol(GO:0005829)         |
| 71565154 | 00064 | <i>ADH5</i>     | Cytoplasm(GO:0005737)              | Nucleus(GO:0005634)              |                             |
| 71772415 | 04723 | <i>RPS15A</i>   | Ribosome(GO:0005840)               |                                  |                             |
| 71772583 | 04698 | <i>RPS29</i>    | Ribosome(GO:0005840)               |                                  |                             |
| 71773010 | 04637 | <i>AP1G1</i>    | Golgi apparatus(GO:0005794)        | Cytosol(GO:0005829)              | Plasma membrane(GO:0005886) |
| 71773106 | 03015 | <i>AP2B1</i>    | Plasma membrane(GO:0005886)        | Mitochondrion(GO:0005739)        |                             |
| 71773329 | 00231 | <i>ANXA6</i>    | Endoplasmic reticulum(GO:0005783)  | Mitochondrion(GO:0005739)        | Plasma membrane(GO:0005886) |
| 71773415 | 00231 | <i>ANXA6</i>    | Endoplasmic reticulum(GO:0005783)  | Mitochondrion(GO:0005739)        | Plasma membrane(GO:0005886) |
| 71979932 | 02552 | <i>SLC7A5</i>   | Plasma membrane(GO:0005886)        | Mitochondrion(GO:0005739)        |                             |
| 7242140  | 07478 | <i>CLPX</i>     | Mitochondrion(GO:0005739)          |                                  |                             |
| 72534660 | 08991 | <i>SFRS7</i>    | Nucleus(GO:0005634)                | Cytoplasm(GO:0005737)            |                             |
| 72534670 | 04850 | <i>PLAA</i>     | Cytoplasm(GO:0005737)              |                                  |                             |
| 72534780 | 12863 | <i>C6orf165</i> | -                                  |                                  |                             |
| 7305303  | 05353 | <i>NCKAP1</i>   | Cytoplasm(GO:0005737)              | Mitochondrion(GO:0005739)        |                             |
| 7305503  | 16310 | <i>STOML2</i>   | Plasma membrane(GO:0005886)        | Integral to membrane(GO:0016021) | Mitochondrion(GO:0005739)   |
| 7330335  | 05943 | <i>CLIC4</i>    | Cytoplasm(GO:0005737)              | Plasma membrane(GO:0005886)      |                             |
| 73466520 | 07188 | <i>ALDH3A2</i>  | Endoplasmic reticulum(GO:0005783)  | Microsome(GO:0005792)            |                             |
| 73486658 | 00684 | <i>GOT2</i>     | Mitochondrion(GO:0005739)          | Nucleolus(GO:0005730)            |                             |
| 73623030 | 02755 | <i>CPT1A</i>    | Mitochondrial membrane(GO:0005739) | Mitochondrion(GO:0005739)        |                             |
| 73695475 | 10962 | <i>HEATR1</i>   | -                                  |                                  |                             |
| 73747840 | 06708 | <i>LONRF3</i>   | -                                  |                                  |                             |
| 73760405 | 01777 | <i>TMPO</i>     | Mitochondrion(GO:0005739)          | Cytoplasm(GO:0005737)            | Nucleus(GO:0005634)         |
| 73808090 | 04576 | <i>ZNF207</i>   | Nucleus(GO:0005634)                | Nucleolus(GO:0005730)            |                             |
| 74136552 | 12129 | <i>MESDC2</i>   | Endoplasmic reticulum(GO:0005783)  |                                  |                             |
| 74136883 | 04185 | <i>HNRNPU</i>   | Nucleus(GO:0005634)                | Cytoplasm(GO:0005737)            | Mitochondrion(GO:0005739)   |
| 74271837 | 00701 | <i>GLUL</i>     | Cytosol(GO:0005829)                |                                  |                             |
| 7427519  | 03485 | <i>MCM6</i>     | Nucleus(GO:0005634)                | Chromosome(GO:0005694)           | Nucleolus(GO:0005730)       |
| 7549809  | 02133 | <i>PLS3</i>     | Cytoplasm(GO:0005737)              |                                  |                             |
| 75677353 | 10679 | <i>ATAD3B</i>   | Mitochondrion(GO:0005739)          |                                  |                             |
| 75709220 | 02653 | <i>CSTF1</i>    | Nucleus(GO:0005634)                | Nucleolus(GO:0005730)            |                             |
| 76096366 | 15141 | <i>PLB1</i>     | Extracellular(GO:0005576)          |                                  |                             |
| 76150625 | 01244 | <i>NOP2</i>     | Nucleolus(GO:0005730)              | Nucleus(GO:0005634)              | Cytoplasm(GO:0005737)       |
| 7656926  | 11644 | <i>TRAPPC3</i>  | Golgi apparatus(GO:0005794)        |                                  |                             |
| 7656952  | 07316 | <i>CACYBP</i>   | Cytoplasm(GO:0005737)              | Nucleus(GO:0005634)              |                             |
| 7656991  | 09244 | <i>CORO1C</i>   | Cytoplasm(GO:0005737)              |                                  |                             |
| 7657015  | 13695 | <i>C22orf28</i> | -                                  |                                  |                             |
| 7657130  | 16142 | <i>GLTSCR2</i>  | Nucleus(GO:0005634)                | Cytoplasm(GO:0005737)            | Nucleolus(GO:0005730)       |

|         |       |                 |                                   |                                   |                                    |
|---------|-------|-----------------|-----------------------------------|-----------------------------------|------------------------------------|
| 7657162 | 16135 | <i>PFDN6</i>    | -                                 |                                   |                                    |
| 7657176 | 12056 | <i>CNPY2</i>    | Integral to membrane(GO:0016021)  | Cytoplasm(GO:0005737)             |                                    |
| 7657234 | 18069 | <i>C11orf58</i> | -                                 |                                   |                                    |
| 7657265 | 16889 | <i>FEM1B</i>    | -                                 |                                   |                                    |
| 7657269 | 05624 | <i>PDS5B</i>    | Nucleus(GO:0005634)               |                                   |                                    |
| 7657315 | 06283 | <i>LSM3</i>     | Cytoplasm(GO:0005737)             | Nucleus(GO:0005634)               |                                    |
| 7657345 | 14787 | <i>MTCH1</i>    | Mitochondrion(GO:0005739)         |                                   |                                    |
| 7657347 | 14788 | <i>MTCH2</i>    | Mitochondrion(GO:0005739)         |                                   |                                    |
| 7657351 | 05349 | <i>MYBBP1A</i>  | Nucleolus(GO:0005730)             | Nucleus(GO:0005634)               |                                    |
| 7657369 | 04525 | <i>NDUFA8</i>   | Mitochondrion(GO:0005739)         |                                   |                                    |
| 7657381 | 12214 | <i>PRPF19</i>   | Nucleus(GO:0005634)               | Nucleolus(GO:0005730)             |                                    |
| 7657548 | 02189 | <i>TRAPPC2</i>  | Endoplasmic reticulum(GO:0005783) | Perinuclear region(GO:0048471)    | Golgi apparatus(GO:0005794)        |
| 7657581 | 04837 | <i>SLC25A13</i> | Mitochondrion(GO:0005739)         |                                   |                                    |
| 7657609 | 07503 | <i>SEC11A</i>   | -                                 |                                   |                                    |
| 7657649 | 10389 | <i>TMOD3</i>    | Cytoplasm(GO:0005737)             |                                   |                                    |
| 7657671 | 02814 | <i>UBTF</i>     | Nucleolus(GO:0005730)             | Nucleus(GO:0005634)               |                                    |
| 7657683 | 09720 | <i>SLC7A11</i>  | Plasma membrane(GO:0005886)       |                                   |                                    |
| 7661568 | 01390 | <i>PGM3</i>     | Cytoplasm(GO:0005737)             |                                   |                                    |
| 7661606 | 13166 | <i>NOC2L</i>    | Nucleolus(GO:0005730)             | Cytoplasm(GO:0005737)             | Nucleus(GO:0005634)                |
| 7661672 | 17874 | <i>POLDIP2</i>  | Nucleus(GO:0005634)               |                                   |                                    |
| 7661786 | 10795 | <i>NDUFAF4</i>  | -                                 |                                   |                                    |
| 7661808 | 13704 | <i>UBE2T</i>    | -                                 |                                   |                                    |
| 7661914 | 18370 | <i>PSMD6</i>    | Peroxisome(GO:0005777)            |                                   |                                    |
| 7661920 | 06482 | <i>EIF4A3</i>   | Nucleus(GO:0005634)               | Nucleolus(GO:0005730)             |                                    |
| 7661936 | 06424 | <i>SAFB2</i>    | Cytoplasm(GO:0005737)             | Nucleus(GO:0005634)               |                                    |
| 7661948 | 13781 | <i>MLEC</i>     | Integral to membrane(GO:0016021)  |                                   |                                    |
| 7661952 | 11532 | <i>SART3</i>    | Nucleus(GO:0005634)               | Cytoplasm(GO:0005737)             |                                    |
| 7661958 | 16544 | <i>BCLAF1</i>   | Nucleus(GO:0005634)               | Cytoplasm(GO:0005737)             |                                    |
| 7661968 | 06273 | <i>CLINT1</i>   | Golgi apparatus(GO:0005794)       | Nucleus(GO:0005634)               | Cytoplasm(GO:0005737)              |
| 7662004 | 08495 | <i>MFN2</i>     | Mitochondrion(GO:0005739)         | Cytoplasm(GO:0005737)             | Mitochondrial membrane(GO:0005740) |
| 7662238 | 05191 | <i>ACIN1</i>    | Nucleus(GO:0005634)               | Cytoplasm(GO:0005737)             |                                    |
| 7662502 | 06634 | <i>MCTS1</i>    | Cytoplasm(GO:0005737)             |                                   |                                    |
| 7662659 | 06218 | <i>SEC24D</i>   | Endoplasmic reticulum(GO:0005783) | Cytoplasm(GO:0005737)             |                                    |
| 7669492 | 00713 | <i>GAPDH</i>    | Cytoplasm(GO:0005737)             | Nucleolus(GO:0005730)             | Extracellular(GO:0005576)          |
| 7669550 | 01900 | <i>VCL</i>      | Cytoplasm(GO:0005737)             | Nucleus(GO:0005634)               | Plasma membrane(GO:0005886)        |
| 7705369 | 02981 | <i>COPB1</i>    | Cytoplasm(GO:0005737)             | Endoplasmic reticulum(GO:0005783) | Endosome(GO:0005768)               |
| 7705373 | 09755 | <i>LIMA1</i>    | Cytoplasm(GO:0005737)             | Nucleus(GO:0005634)               | Cytoskeleton(GO:0005856)           |
| 7705433 | 10932 | <i>EIF3L</i>    | Cytoplasm(GO:0005737)             |                                   |                                    |
| 7705477 | 13705 | <i>TRMT112</i>  | -                                 |                                   |                                    |
| 7705481 | 15643 | <i>UFC1</i>     | -                                 |                                   |                                    |
| 7705501 | 15524 | <i>TMEM14C</i>  | Integral to membrane(GO:0016021)  |                                   |                                    |

|          |       |                  |                                   |                             |                           |
|----------|-------|------------------|-----------------------------------|-----------------------------|---------------------------|
| 7705558  | 17163 | <i>ISYNA1</i>    | -                                 |                             |                           |
| 7705636  | 13035 | <i>GOLT1B</i>    | -                                 |                             |                           |
| 7705696  | 11633 | <i>TXNDC12</i>   | Endoplasmic reticulum(GO:0005783) | Golgi apparatus(GO:0005794) | Mitochondrion(GO:0005739) |
| 7705704  | 13613 | <i>GSTK1</i>     | Peroxisome(GO:0005777)            | Mitochondrion(GO:0005739)   |                           |
| 7705706  | 18003 | <i>RPS27L</i>    | Ribosome(GO:0005840)              |                             |                           |
| 7705726  | 07159 | <i>TMX2</i>      | -                                 |                             |                           |
| 7705738  | 17601 | <i>MRPS7</i>     | Mitochondrion(GO:0005739)         |                             |                           |
| 7705785  | 09515 | <i>TFB1M</i>     | Mitochondrion(GO:0005739)         |                             |                           |
| 7705809  | 16711 | <i>UTP11L</i>    | Nucleolus(GO:0005730)             | Nucleus(GO:0005634)         | Extracellular(GO:0005576) |
| 7705823  | 07136 | <i>NAT5</i>      | Cytoplasm(GO:0005737)             |                             |                           |
| 7705855  | 09989 | <i>HSD17B12</i>  | Endoplasmic reticulum(GO:0005783) | Mitochondrion(GO:0005739)   |                           |
| 7705877  | 13665 | <i>HN1</i>       | Nucleus(GO:0005634)               | Cytoplasm(GO:0005737)       |                           |
| 7706254  | 11036 | <i>NOP58</i>     | Nucleolus(GO:0005730)             | Ribosome(GO:0005840)        |                           |
| 7706322  | 16615 | <i>C14orf166</i> | Nucleus(GO:0005634)               | Cytosol(GO:0005829)         | Nucleolus(GO:0005730)     |
| 7706326  | 09702 | <i>SF3B14</i>    | Nucleus(GO:0005634)               | Nucleolus(GO:0005730)       |                           |
| 7706333  | 14767 | <i>MRPL48</i>    | Mitochondrion(GO:0005739)         |                             |                           |
| 7706339  | 03194 | <i>PPIL1</i>     | Cytoplasm(GO:0005737)             |                             |                           |
| 7706351  | 12273 | <i>PTRH2</i>     | Mitochondrion(GO:0005739)         | Cytoplasm(GO:0005737)       |                           |
| 7706423  | 06287 | <i>LSM7</i>      | Cytoplasm(GO:0005737)             | Nucleus(GO:0005634)         |                           |
| 7706425  | 06288 | <i>LSM8</i>      | Cytoplasm(GO:0005737)             | Nucleus(GO:0005634)         |                           |
| 7706427  | 05825 | <i>CPSF3</i>     | Nucleus(GO:0005634)               |                             |                           |
| 7706437  | 05068 | <i>MAN1B1</i>    | Endoplasmic reticulum(GO:0005783) |                             |                           |
| 7706441  | 09499 | <i>VPS29</i>     | Endosome(GO:0005768)              | Golgi apparatus(GO:0005794) |                           |
| 7706481  | 10091 | <i>CAB39</i>     | -                                 |                             |                           |
| 7706485  | 05868 | <i>TRAP1</i>     | Mitochondrion(GO:0005739)         |                             |                           |
| 7706497  | 18258 | <i>CMPK1</i>     | Cytoplasm(GO:0005737)             | Nucleus(GO:0005634)         |                           |
| 7706501  | 18293 | <i>WBP11</i>     | Nucleus(GO:0005634)               | Nucleolus(GO:0005730)       | Cytoplasm(GO:0005737)     |
| 7706581  | 16542 | <i>BCCIP</i>     | Nucleus(GO:0005634)               |                             |                           |
| 7706708  | 15492 | <i>TEX264</i>    | Extracellular(GO:0005576)         |                             |                           |
| 7706757  | 16524 | <i>ATP6V1D</i>   | Integral to membrane(GO:0016021)  | Cytosol(GO:0005829)         |                           |
| 77404397 | 03714 | <i>SND1</i>      | Nucleus(GO:0005634)               |                             |                           |
| 77539758 | 18843 | <i>HIST2H4B</i>  | -                                 |                             |                           |
| 78000183 | 10617 | <i>RPL14</i>     | Ribosome(GO:0005840)              | Nucleolus(GO:0005730)       |                           |
| 78214522 | 16048 | <i>RPL38</i>     | Ribosome(GO:0005840)              |                             |                           |
| 8051608  | 00783 | <i>HMOX2</i>     | Endoplasmic reticulum(GO:0005783) | Mitochondrion(GO:0005739)   |                           |
| 8051631  | 11480 | <i>RALY</i>      | Cytoplasm(GO:0005737)             | Mitochondrion(GO:0005739)   | Nucleus(GO:0005634)       |
| 8051636  | 04418 | <i>XPOT</i>      | Nucleus(GO:0005634)               | Cytoplasm(GO:0005737)       |                           |
| 81295407 | 06438 | <i>ACOT9</i>     | Mitochondrion(GO:0005739)         |                             |                           |
| 81295809 | 05804 | <i>PCNT</i>      | Centrosome(GO:0005813)            |                             |                           |
| 82546879 | 03765 | <i>GTPBP1</i>    | Cytoplasm(GO:0005737)             |                             |                           |
| 82617634 | 07556 | <i>CYFIP2</i>    | Cytoplasm(GO:0005737)             | Synapse(GO:0045202)         |                           |



|          |       |                  |                                   |                                |                             |
|----------|-------|------------------|-----------------------------------|--------------------------------|-----------------------------|
| 82659109 | 10184 | <i>UBR4</i>      | Cytoplasm(GO:0005737)             | Nucleus(GO:0005634)            |                             |
| 82775373 | 17605 | <i>SLC25A37</i>  | Mitochondrion(GO:0005739)         |                                |                             |
| 82880645 | 06279 | <i>USP14</i>     | Cytosol(GO:0005829)               |                                |                             |
| 83267868 | 03334 | <i>DYNLL1</i>    | Cytoplasm(GO:0005737)             | Perinuclear region(GO:0048471) | Microtubule(GO:0005874)     |
| 83267877 | 04128 | <i>RGPD5</i>     | Nucleus(GO:0005634)               |                                |                             |
| 83367072 | 06795 | <i>EIF3B</i>     | Ribosome(GO:0005840)              | Cytoplasm(GO:0005737)          | Nucleus(GO:0005634)         |
| 83376130 | 02804 | <i>EEF1B2</i>    | Cytoplasm(GO:0005737)             |                                |                             |
| 83627705 | 15629 | <i>UQCRH</i>     | Mitochondrion(GO:0005739)         |                                |                             |
| 83700233 | 04889 | <i>EIF3C</i>     | Cytoplasm(GO:0005737)             | Ribosome(GO:0005840)           |                             |
| 83700235 | 03062 | <i>EIF4A2</i>    | Cytoplasm(GO:0005737)             |                                |                             |
| 83921602 | 17506 | <i>SLC38A10</i>  | Integral to membrane(GO:0016021)  |                                |                             |
| 83921614 | 13106 | <i>CYB5B</i>     | Mitochondrion(GO:0005739)         |                                |                             |
| 8393516  | 02229 | <i>NSDHL</i>     | Endoplasmic reticulum(GO:0005783) | Mitochondrion(GO:0005739)      | Golgi apparatus(GO:0005794) |
| 84043963 | 07304 | <i>EIF5B</i>     | Cytoplasm(GO:0005737)             | Nucleus(GO:0005634)            | Nucleolus(GO:0005730)       |
| 84993742 | 19029 | <i>TRIM71</i>    | -                                 |                                |                             |
| 85362737 | 16648 | <i>C20orf27</i>  | -                                 |                                |                             |
| 85794908 | 16520 | <i>ATP5J2</i>    | Mitochondrion(GO:0005739)         |                                |                             |
| 85797673 | 19050 | <i>BOLA2B</i>    | -                                 |                                |                             |
| 86604706 | 08217 | <i>C8orf79</i>   | -                                 |                                |                             |
| 86792661 | 06012 | <i>DPP3</i>      | Cytoplasm(GO:0005737)             |                                |                             |
| 86990441 | 02753 | <i>MARK2</i>     | Plasma membrane(GO:0005886)       | Cytoskeleton(GO:0005856)       | Nucleus(GO:0005634)         |
| 87159816 | 00163 | <i>ATP6V1E1</i>  | Lysosome(GO:0005764)              | Cytoplasm(GO:0005737)          | Golgi apparatus(GO:0005794) |
| 87159824 | 03763 | <i>CD151</i>     | Plasma membrane(GO:0005886)       | Early endosome(GO:0005769)     | Late endosome(GO:0005770)   |
| 87162455 | 10014 | <i>KIAA0664</i>  | Cytoplasm(GO:0005737)             |                                |                             |
| 87196343 | 10142 | <i>PDZD2</i>     | Endoplasmic reticulum(GO:0005783) | Extracellular(GO:0005576)      | Cytoplasm(GO:0005737)       |
| 87196351 | 02154 | <i>DDX3X</i>     | Nucleus(GO:0005634)               | Nucleolus(GO:0005730)          | Cytoplasm(GO:0005737)       |
| 88501738 | 11028 | <i>TRIOBP</i>    | -                                 |                                |                             |
| 88703041 | 12086 | <i>SNX6</i>      | Cytoplasm(GO:0005737)             | Golgi apparatus(GO:0005794)    | Plasma membrane(GO:0005886) |
| 88758611 | 02819 | <i>KPNA1</i>     | Cytoplasm(GO:0005737)             | Nucleus(GO:0005634)            |                             |
| 88853069 | 01902 | <i>VTN</i>       | Extracellular(GO:0005576)         |                                |                             |
| 88900491 | 03516 | <i>GANAB</i>     | Endoplasmic reticulum(GO:0005783) | Centrosome(GO:0005813)         |                             |
| 88947627 | 19015 | <i>LOC653566</i> | Integral to membrane(GO:0016021)  |                                |                             |
| 88947792 | 19232 | <i>LOC645441</i> | -                                 |                                |                             |
| 88952764 | 18918 | <i>MIA3</i>      | -                                 |                                |                             |
| 88967349 | 19396 | <i>UBXD7</i>     | -                                 |                                |                             |
| 88979543 | 19228 | <i>LOC643751</i> | -                                 |                                |                             |
| 88981231 | 13346 | <i>NBLA00301</i> | -                                 |                                |                             |
| 88983788 | 19223 | <i>LOC643752</i> | -                                 |                                |                             |
| 88988836 | 19327 | <i>LOC401206</i> | -                                 |                                |                             |
| 88999401 | 18934 | <i>KIAA1553</i>  | Nucleus(GO:0005634)               |                                |                             |
| 88999528 | 19292 | <i>LOC389435</i> | -                                 |                                |                             |

|          |       |                  |                                   |                                  |                                  |
|----------|-------|------------------|-----------------------------------|----------------------------------|----------------------------------|
| 88999583 | 17618 | <i>MYL6</i>      | Cytoplasm(GO:0005737)             | Cytoskeleton(GO:0005856)         |                                  |
| 89026818 | 04700 | <i>RPL21</i>     | Ribosome(GO:0005840)              | Nucleolus(GO:0005730)            |                                  |
| 89034466 | 19215 | <i>LOC653147</i> | -                                 |                                  |                                  |
| 89035055 | 18543 | <i>FAT3</i>      | Integral to membrane(GO:0016021)  |                                  |                                  |
| 89036292 | 19229 | <i>LOC643576</i> | -                                 |                                  |                                  |
| 89037727 | 11688 | <i>YLPM1</i>     | Nucleus(GO:0005634)               |                                  |                                  |
| 89060593 | 19235 | <i>LOC644820</i> | -                                 |                                  |                                  |
| 8922297  | 08476 | <i>LUC7L</i>     | Nucleus(GO:0005634)               |                                  |                                  |
| 8922331  | 08544 | <i>MAGOHB</i>    | Nucleus(GO:0005634)               |                                  |                                  |
| 8922467  | 10214 | <i>SDAD1</i>     | Nucleolus(GO:0005730)             | Cytoplasm(GO:0005737)            | Nucleus(GO:0005634)              |
| 8922491  | 07680 | <i>TMEM33</i>    | Membrane fraction(GO:0005624)     | Integral to membrane(GO:0016021) |                                  |
| 8922557  | 04038 | <i>SLC4A1AP</i>  | Nucleus(GO:0005634)               | Mitochondrion(GO:0005739)        |                                  |
| 8922629  | 07112 | <i>DNAJC11</i>   | -                                 |                                  |                                  |
| 8922665  | 07313 | <i>PANK4</i>     | -                                 |                                  |                                  |
| 8922686  | 16593 | <i>C14orf115</i> | Nucleus(GO:0005634)               |                                  |                                  |
| 8922699  | 09893 | <i>CNDP2</i>     | Cytoplasm(GO:0005737)             |                                  |                                  |
| 8922701  | 08554 | <i>AGK</i>       | Integral to membrane(GO:0016021)  |                                  |                                  |
| 8922712  | 08555 | <i>SEPT11</i>    | Perinuclear region(GO:0048471)    | Microtubule(GO:0005874)          | Cytoplasm(GO:0005737)            |
| 8922762  | 17607 | <i>ADI1</i>      | Plasma membrane(GO:0005886)       | Nucleus(GO:0005634)              | Cytoplasm(GO:0005737)            |
| 8922886  | 07732 | <i>DDX19A</i>    | -                                 |                                  |                                  |
| 8922964  | 15455 | <i>SYNJ2BP</i>   | Mitochondrion(GO:0005739)         | Cytoplasm(GO:0005737)            |                                  |
| 8923053  | 17476 | <i>MED18</i>     | -                                 |                                  |                                  |
| 8923269  | 15489 | <i>TEX10</i>     | -                                 |                                  |                                  |
| 8923398  | 10064 | <i>LYAR</i>      | Nucleolus(GO:0005730)             |                                  |                                  |
| 8923448  | 14743 | <i>MRPL16</i>    | Mitochondrion(GO:0005739)         |                                  |                                  |
| 8923503  | 07924 | <i>C4orf27</i>   | -                                 |                                  |                                  |
| 8923557  | 12738 | <i>C20orf11</i>  | -                                 |                                  |                                  |
| 8923579  | 07933 | <i>C11orf59</i>  | -                                 |                                  |                                  |
| 8923710  | 13627 | <i>CDV3</i>      | Nucleus(GO:0005634)               |                                  |                                  |
| 8923900  | 04501 | <i>CMAS</i>      | Nucleus(GO:0005634)               | Cytoplasm(GO:0005737)            |                                  |
| 8923920  | 13625 | <i>H2AFY2</i>    | Nucleus(GO:0005634)               |                                  |                                  |
| 89274169 | 12338 | <i>CIAPIN1</i>   | Cytoplasm(GO:0005737)             |                                  |                                  |
| 89903012 | 00309 | <i>CDC42</i>     | Cytoplasm(GO:0005737)             | Apical membrane(GO:0016327)      | Plasma membrane(GO:0005886)      |
| 90819237 | 01164 | <i>MLLT4</i>     | Cytoplasm(GO:0005737)             | Plasma membrane(GO:0005886)      | Basolateral membrane(GO:0016323) |
| 90903231 | 00883 | <i>HTT</i>       | Cytoplasm(GO:0005737)             | Perinuclear region(GO:0048471)   | Plasma membrane(GO:0005886)      |
| 91199540 | 02006 | <i>DLD</i>       | Mitochondrion(GO:0005739)         |                                  |                                  |
| 91208418 | 10393 | <i>TCERG1</i>    | Nucleus(GO:0005634)               | Nucleolus(GO:0005730)            |                                  |
| 91208423 | 04242 | <i>TRIP6</i>     | Nucleus(GO:0005634)               | Cytoplasm(GO:0005737)            | Plasma membrane(GO:0005886)      |
| 91208426 | 06295 | <i>PRPF8</i>     | Nucleus(GO:0005634)               | Nucleolus(GO:0005730)            | Cytoplasm(GO:0005737)            |
| 91807125 | 12270 | <i>FAM3C</i>     | Extracellular(GO:0005576)         |                                  |                                  |
| 91984773 | 16397 | <i>APOA1BP</i>   | Endoplasmic reticulum(GO:0005783) | Extracellular(GO:0005576)        |                                  |

|          |       |                |                                   |                                            |                                   |
|----------|-------|----------------|-----------------------------------|--------------------------------------------|-----------------------------------|
| 9257257  | 09199 | <i>WDR1</i>    | Cytoplasm(GO:0005737)             |                                            |                                   |
| 92859701 | 02985 | <i>MYO6</i>    | Golgi apparatus(GO:0005794)       | Cytoplasm(GO:0005737)                      |                                   |
| 93277122 | 03982 | <i>RBM4</i>    | Nucleus(GO:0005634)               | Nucleolus(GO:0005730)                      |                                   |
| 94421475 | 15117 | <i>PEG10</i>   | Nucleus(GO:0005634)               | Cytoplasm(GO:0005737)                      |                                   |
| 94536784 | 08571 | <i>CCDC51</i>  | -                                 |                                            |                                   |
| 94538322 | 00731 | <i>HAGH</i>    | Cytoplasm(GO:0005737)             | Mitochondrion(GO:0005739)                  |                                   |
| 94538354 | 07539 | <i>PMPCB</i>   | Mitochondrion(GO:0005739)         |                                            |                                   |
| 94538362 | 00580 | <i>FLOT2</i>   | Plasma membrane(GO:0005886)       |                                            |                                   |
| 94557305 | 11370 | <i>MRPL19</i>  | Mitochondrion(GO:0005739)         |                                            |                                   |
| 94557308 | 08372 | <i>HADH</i>    | Mitochondrion(GO:0005739)         | Nucleolus(GO:0005730)                      | Endoplasmic reticulum(GO:0005783) |
| 94681057 | 13025 | <i>YARS2</i>   | -                                 |                                            |                                   |
| 94721241 | 02832 | <i>IARS</i>    | Cytoplasm(GO:0005737)             | Mitochondrion(GO:0005739)                  | Ribosome(GO:0005840)              |
| 94721250 | 09299 | <i>VAPA</i>    | Golgi membrane(GO:0000139)        | Endoplasmic reticulum membrane(GO:0005789) | Mitochondrion(GO:0005739)         |
| 94721354 | 05351 | <i>MTHFD2</i>  | Mitochondrion(GO:0005739)         |                                            |                                   |
| 9506689  | 16221 | <i>EXOSC4</i>  | Nucleolus(GO:0005730)             | Cytoplasm(GO:0005737)                      | Nucleus(GO:0005634)               |
| 9506931  | 12154 | <i>DDX56</i>   | Nucleolus(GO:0005730)             | Cytoplasm(GO:0005737)                      | Nucleus(GO:0005634)               |
| 95113651 | 10153 | <i>GLRX3</i>   | Cytoplasm(GO:0005737)             |                                            |                                   |
| 95147538 | 04089 | <i>APBB3</i>   | Nucleus(GO:0005634)               | Cytoplasm(GO:0005737)                      |                                   |
| 9845297  | 05560 | <i>DIABLO</i>  | Mitochondrion(GO:0005739)         | Cytoplasm(GO:0005737)                      |                                   |
| 9845502  | 01038 | <i>RPSA</i>    | Cytoplasm(GO:0005737)             | Nucleolus(GO:0005730)                      | Cytosol(GO:0005829)               |
| 9845509  | 03627 | <i>RAC1</i>    | Cytoplasm(GO:0005737)             | Plasma membrane(GO:0005886)                | Membrane fraction(GO:0005624)     |
| 9845516  | 15914 | <i>S100A4</i>  | Cytoplasm(GO:0005737)             | Nucleolus(GO:0005730)                      | Nucleus(GO:0005634)               |
| 98985810 | 00375 | <i>COL11A1</i> | Extracellular(GO:0005576)         |                                            |                                   |
| 98986464 | 12013 | <i>TMED10</i>  | Integral to membrane(GO:0016021)  | Zymogen granule(GO:0042588)                | Golgi apparatus(GO:0005794)       |
| 9910186  | 13121 | <i>ENY2</i>    | Nucleus(GO:0005634)               |                                            |                                   |
| 9910242  | 17041 | <i>CCDC47</i>  | Mitochondrion(GO:0005739)         |                                            |                                   |
| 9910262  | 17917 | <i>PRTFDC1</i> | -                                 |                                            |                                   |
| 9910352  | 15334 | <i>SH3GLB2</i> | Cytoplasm(GO:0005737)             |                                            |                                   |
| 9910382  | 06130 | <i>TOMM22</i>  | Mitochondrion(GO:0005739)         |                                            |                                   |
| 9910542  | 07608 | <i>SAR1A</i>   | Endoplasmic reticulum(GO:0005783) |                                            |                                   |
| 9945306  | 00705 | <i>MGST1</i>   | Microsome(GO:0005792)             | Nuclear membrane(GO:0005635)               | Endoplasmic reticulum(GO:0005783) |
| 9951915  | 01621 | <i>AHCY</i>    | Cytoplasm(GO:0005737)             |                                            |                                   |
| 9955960  | 01153 | <i>ABCC1</i>   | Plasma membrane(GO:0005886)       | Cytoplasm(GO:0005737)                      | Lysosome(GO:0005764)              |
| 9966877  | 06024 | <i>GOPC</i>    | Golgi apparatus(GO:0005794)       | Plasma membrane(GO:0005886)                | Cytoplasm(GO:0005737)             |
| 9966897  | 12501 | <i>ATP13A1</i> | Integral to membrane(GO:0016021)  | Nucleus(GO:0005634)                        |                                   |
