# Supplementary material
Source: PubMed Central journal article supplement (PMC3086450)
Supplement: NIHMS283894-supplement-Supplementary_Table_3.pdf [file NIHMS283894-supplement-Supplementary_Table_3.pdf]

Supplementary Table 3. List of proteins ~481 proteins classified as cancer gene clusters using Ingenuity pathway analysis. (p value ranged 1.95E-10 to 2.81E-02)Chaerkady et al. - Comparative proteomics of human embryonic stem cells and embryonal carcinoma cells

| <b>Gene Symbol</b> | <b>Protein Name</b>                                                         | <b>Ratio ESC/ECC</b> |
|--------------------|-----------------------------------------------------------------------------|----------------------|
| ABCB7              | ATP-binding cassette, sub-family B, member 7                                | 0.96                 |
| ABCC1              | ATP-binding cassette, sub-family C, member 1 isoform 7                      | 1.09                 |
| ABCE1              | ATP-binding cassette, sub-family E, member 1                                | 1.09                 |
| ABCF2              | ATP-binding cassette, sub-family F, member 2 isoform a                      | 1.03                 |
| ACACA              | acetyl-Coenzyme A carboxylase alpha isoform 1                               | 7.73                 |
| ACLY               | ATP citrate lyase isoform 2                                                 | 1.29                 |
| ACOT9              | acyl-Coenzyme A thioesterase 2, mitochondrial isoform a                     | 1.14                 |
| ACTC1              | cardiac muscle alpha actin 1 proprotein                                     | 9.20                 |
| ACTG1              | actin, gamma 1 propeptide                                                   | 0.43                 |
| ACY1               | aminoacylase 1                                                              | 2.51                 |
| ADI1               | membrane-type 1 matrix metalloproteinase cytoplasmic tail binding protein-1 | 1.36                 |
| ADSL               | adenylosuccinate lyase                                                      | 1.26                 |
| AHCY               | S-adenosylhomocysteine hydrolase                                            | 0.13                 |
| AHCYL1             | S-adenosylhomocysteine hydrolase-like 1                                     | 1.22                 |
| AHSA1              | AHA1, activator of heat shock 90kDa protein ATPase homolog 1                | 0.89                 |
| AIFM1              | programmed cell death 8 isoform 1                                           | 1.08                 |
| AKAP12             | A-kinase anchor protein 12 isoform 2                                        | 3.02                 |
| ALDH1B1            | aldehyde dehydrogenase 1B1                                                  | 0.47                 |
| ALDOA              | aldolase A                                                                  | 0.49                 |
| ALPL               | tissue non-specific alkaline phosphatase                                    | 1.17                 |
| ANP32A             | acidic (leucine-rich) nuclear phosphoprotein 32 family, member A            | 0.59                 |
| ANXA1              | annexin I                                                                   | 10.86                |
| ANXA2              | annexin A2 isoform 1                                                        | 0.58                 |
| ANXA5              | annexin 5                                                                   | 1.92                 |
| AP2A2              | adaptor-related protein complex 2, alpha 2 subunit                          | 1.01                 |
| APOE               | apolipoprotein E                                                            | 2.09                 |
| APP                | amyloid beta A4 protein , isoform a                                         | 0.63                 |
| ARF4               | ADP-ribosylation factor 4                                                   | 1.03                 |
| ARHGDI1            | Rho GDP dissociation inhibitor (GDI) alpha                                  | 3.47                 |
| ARID3A             | AT rich interactive domain 3A (BRIGHT- like) protein                        | 0.99                 |
| ARPC4              | actin related protein 2/3 complex subunit 4 isoform a                       | 0.42                 |

|          |                                                                                           |       |
|----------|-------------------------------------------------------------------------------------------|-------|
| ARRB1    | arrestin beta 1 isoform A                                                                 | 1.39  |
| ASNS     | asparagine synthetase                                                                     | 2.51  |
| ATIC     | 5-aminoimidazole-4-carboxamide ribonucleotide formyltransferase/IMP cyclohydrolase        | 0.84  |
| ATP1A1   | Na <sup>+</sup> /K <sup>+</sup> -ATPase alpha 1 subunit isoform a proprotein              | 0.87  |
| ATP2A2   | ATPase, Ca <sup>++</sup> transporting, cardiac muscle, slow twitch 2 isoform 1            | 0.88  |
| ATP5J    | ATP synthase, H <sup>+</sup> transporting, mitochondrial F0 complex, subunit F6 isoform a | 2.09  |
| ATP6V1E1 | vacuolar H <sup>+</sup> ATPase E1 isoform b                                               | 1.00  |
| ATXN2L   | ataxin 2 related protein isoform C                                                        | 0.95  |
| BAT1     | HLA-B associated transcript 1                                                             | 0.08  |
| BAT2D1   | HBxAg transactivated protein 2                                                            | 0.88  |
| BAT3     | HLA-B associated transcript-3 isoform a                                                   | 1.91  |
| BCAR1    | breast cancer anti-estrogen resistance 1                                                  | 1.24  |
| BCCIP    | BRCA2 and CDKN1A-interacting protein isoform BCCIPbeta                                    | 1.08  |
| BCLAF1   | BCL2-associated transcription factor 1 isoform 1                                          | 0.87  |
| BGN      | biglycan preproprotein                                                                    | 10.38 |
| BSG      | basigin isoform 2                                                                         | 0.98  |
| BZW1     | PREDICTED: similar to basic leucine zipper and W2 domains 1                               | 0.49  |
| C1QBP    | complement component 1, q subcomponent binding protein                                    | 1.02  |
| C2orf27  | hypothetical protein LOC54976                                                             | 0.81  |
| CACYBP   | calcyclin binding protein isoform 1                                                       | 0.50  |
| CALD1    | caldesmon 1 isoform 2                                                                     | 4.33  |
| CALR     | calreticulin precursor                                                                    | 1.47  |
| CANX     | calnexin                                                                                  | 3.77  |
| CAPN5    | calpain 5                                                                                 | 1.27  |
| CAPRIN1  | membrane component chromosome 11 surface marker 1 isoform 1                               | 0.82  |
| CARS     | cysteinyl-tRNA synthetase isoform c                                                       | 2.70  |
| CASP3    | caspase 3 preproprotein                                                                   | 5.40  |
| CAV1     | caveolin 1                                                                                | 1.34  |
| CBR1     | carbonyl reductase 1                                                                      | 8.47  |
| CBX5     | chromobox homolog 5 (HP1 alpha homolog, Drosophila)                                       | 0.51  |
| CCAR1    | cell-cycle and apoptosis regulatory protein 1                                             | 1.42  |
| CCDC6    | coiled-coil domain containing 6                                                           | 1.53  |
| CCT2     | chaperonin containing TCP1, subunit 2                                                     | 0.95  |
| CCT3     | chaperonin containing TCP1, subunit 3 isoform a                                           | 0.63  |
| CCT4     | chaperonin containing TCP1, subunit 4 (delta)                                             | 0.79  |
| CCT5     | chaperonin containing TCP1, subunit 5 (epsilon)                                           | 1.57  |
| CCT6A    | chaperonin containing TCP1, subunit 6A isoform a                                          | 1.11  |

|         |                                                        |      |
|---------|--------------------------------------------------------|------|
| CCT7    | chaperonin containing TCP1, subunit 7 isoform a        | 0.43 |
| CCT8    | chaperonin containing TCP1, subunit 8 (theta)          | 0.96 |
| CD151   | CD151 antigen                                          | 1.34 |
| CD2AP   | CD2-associated protein                                 | 1.61 |
| CD9     | CD9 antigen                                            | 0.62 |
| CDC2    | cell division cycle 2 protein isoform 1                | 1.05 |
| CDC37   | cell division cycle 37 protein                         | 2.51 |
| CDC42   | cell division cycle 42 isoform 2                       | 0.94 |
| CDH3    | cadherin 3, type 1 preproprotein                       | 2.31 |
| CDV3    | PREDICTED: similar to CDV3 homolog                     | 1.13 |
| CHEK1   | CHK1 checkpoint homolog                                | 0.95 |
| CNN2    | calponin 2 isoform a                                   | 0.65 |
| COPE    | epsilon subunit of coatamer protein complex isoform a  | 1.12 |
| COPS2   | COP9 constitutive photomorphogenic homolog subunit 2   | 1.14 |
| COX5A   | cytochrome c oxidase subunit Va                        | 0.86 |
| CRABP1  | cellular retinoic acid binding protein 1               | 1.32 |
| CRABP2  | cellular retinoic acid binding protein 2               | 0.23 |
| CRKL    | v-crk sarcoma virus CT10 oncogene homolog (avian)-like | 0.54 |
| CSE1L   | CSE1 chromosome segregation 1-like protein             | 0.26 |
| CSNK2A1 | casein kinase II alpha 1 subunit isoform a             | 4.13 |
| CSNK2B  | casein kinase 2, beta polypeptide                      | 1.36 |
| CSRP2   | cysteine and glycine-rich protein 2                    | 0.60 |
| CTBP2   | C-terminal binding protein 2 isoform 2                 | 1.13 |
| CTNNB1  | catenin (cadherin-associated protein), beta 1, 88kDa   | 2.61 |
| CTNND1  | catenin (cadherin-associated protein), delta 1         | 1.61 |
| CTSC    | cathepsin C isoform a preproprotein                    | 0.57 |
| CTSD    | cathepsin D preproprotein                              | 0.89 |
| CTTN    | cortactin isoform b                                    | 2.56 |
| CXADR   | coxsackie virus and adenovirus receptor                | 0.74 |
| CYB5A   | cytochrome b-5 isoform 2                               | 1.06 |
| CYFIP1  | cytoplasmic FMR1 interacting protein 1 isoform a       | 1.25 |
| DARS    | aspartyl-tRNA synthetase                               | 0.81 |
| DBI     | diazepam binding inhibitor isoform 2                   | 0.34 |
| DBN1    | drebrin 1 isoform a                                    | 9.12 |
| DCK     | deoxycytidine kinase                                   | 1.10 |
| DDB1    | damage-specific DNA binding protein 1                  | 0.33 |
| DDX1    | DEAD (Asp-Glu-Ala-Asp) box polypeptide 1               | 1.38 |

|        |                                                                    |      |
|--------|--------------------------------------------------------------------|------|
| DDX17  | DEAD box polypeptide 17 isoform p82                                | 0.08 |
| DDX39  | DEAD (Asp-Glu-Ala-Asp) box polypeptide 39                          | 0.97 |
| DDX47  | DEAD (Asp-Glu-Ala-Asp) box polypeptide 47 isoform 1                | 0.62 |
| DDX5   | DEAD (Asp-Glu-Ala-Asp) box polypeptide 5                           | 0.95 |
| DDX6   | DEAD (Asp-Glu-Ala-Asp) box polypeptide 6                           | 5.50 |
| DFFA   | DNA fragmentation factor, 45kDa, alpha polypeptide isoform 1       | 1.39 |
| DHCR24 | 24-dehydrocholesterol reductase                                    | 0.80 |
| DIABLO | diablo isoform 1 precursor                                         | 0.70 |
| DIAPH1 | diaphanous 1 isoform 2                                             | 0.87 |
| DNAJA1 | DnaJ (Hsp40) homolog, subfamily A, member 1                        | 0.26 |
| DNAJB1 | DnaJ (Hsp40) homolog, subfamily B, member 1                        | 0.83 |
| DNM1L  | dynammin 1-like protein isoform 1                                  | 0.67 |
| DNMT1  | DNA (cytosine-5-)-methyltransferase 1                              | 0.61 |
| DNMT3B | DNA cytosine-5 methyltransferase 3 beta isoform 1                  | 5.65 |
| DPYSL2 | dihydropyrimidinase-like 2                                         | 0.65 |
| DR1    | down-regulator of transcription 1                                  | 0.59 |
| DRG1   | developmentally regulated GTP binding protein 1                    | 1.01 |
| DUSP5  | dual specificity phosphatase 5                                     | 0.57 |
| DYNLL1 | dynein light chain 1                                               | 1.32 |
| EEF1A1 | eukaryotic translation elongation factor 1 alpha 1                 | 1.72 |
| EEF1E1 | eukaryotic translation elongation factor 1 epsilon 1               | 0.94 |
| EIF2S3 | eukaryotic translation initiation factor 2, subunit 3 gamma, 52kDa | 0.44 |
| EIF3E  | eukaryotic translation initiation factor 3, subunit 6 48kDa        | 0.84 |
| EIF4A1 | eukaryotic translation initiation factor 4A isoform 1              | 1.80 |
| EIF4A2 | eukaryotic translation initiation factor 4A2                       | 0.42 |
| EIF4B  | eukaryotic translation initiation factor 4B                        | 1.51 |
| EIF4E  | eukaryotic translation initiation factor 4E                        | 4.17 |
| ELAC2  | elaC homolog 2                                                     | 1.77 |
| ELAVL1 | ELAV-like 1                                                        | 0.43 |
| ELL    | elongation factor RNA polymerase II                                | 0.55 |
| ENO1   | enolase 1                                                          | 1.67 |
| EPHA2  | ephrin receptor EphA2                                              | 1.37 |
| EPHX1  | epoxide hydrolase 1, microsomal (xenobiotic)                       | 1.03 |
| EPPK1  | epiplakin 1                                                        | 1.11 |
| ETFA   | electron transfer flavoprotein, alpha polypeptide                  | 0.90 |
| EZR    | villin 2                                                           | 3.63 |
| FABP3  | fatty acid binding protein 3                                       | 0.60 |

|         |                                                                                         |      |
|---------|-----------------------------------------------------------------------------------------|------|
| FABP5   | fatty acid binding protein 5 (psoriasis-associated)                                     | 2.81 |
| FADD    | Fas-associated via death domain                                                         | 1.20 |
| FANCD2  | Fanconi anemia complementation group D2 isoform b                                       | 0.61 |
| FASN    | fatty acid synthase                                                                     | 0.55 |
| FDFT1   | farnesyl-diphosphate farnesyltransferase 1                                              | 0.69 |
| FDPS    | farnesyl diphosphate synthase                                                           | 0.70 |
| FEN1    | flap structure-specific endonuclease 1                                                  | 0.99 |
| FH      | fumarate hydratase                                                                      | 0.95 |
| FKBP5   | FK506 binding protein 5                                                                 | 0.74 |
| FKBP8   | FK506-binding protein 8                                                                 | 0.74 |
| FLNA    | filamin A, alpha                                                                        | 3.63 |
| FLT1    | fms-related tyrosine kinase 1                                                           | 0.91 |
| FSCN1   | fascin 1                                                                                | 0.36 |
| FTH1    | ferritin, heavy polypeptide 1                                                           | 3.70 |
| FUBP1   | far upstream element-binding protein                                                    | 1.94 |
| FUS     | fusion (involved in t(12;16) in malignant liposarcoma) isoform a                        | 1.12 |
| FXN     | frataxin isoform 2 preproprotein                                                        | 1.07 |
| FXR1    | fragile X mental retardation-related protein 1 isoform c                                | 0.90 |
| G6PD    | glucose-6-phosphate dehydrogenase isoform a                                             | 1.61 |
| GANAB   | alpha glucosidase II alpha subunit isoform 3                                            | 0.91 |
| GART    | phosphoribosylglycinamide formyltransferase,                                            | 0.97 |
| GEMIN4  | gemin 4                                                                                 | 1.49 |
| GJA1    | connexin 43                                                                             | 2.73 |
| GLG1    | golgi apparatus protein 1                                                               | 0.94 |
| GLO1    | glyoxalase I                                                                            | 1.24 |
| GLRX3   | thioredoxin-like                                                                        | 1.17 |
| GLUD1   | glutamate dehydrogenase 1                                                               | 1.08 |
| GLUL    | glutamine synthetase                                                                    | 1.05 |
| GMPS    | guanine monophosphate synthetase                                                        | 0.44 |
| GNAI2   | guanine nucleotide binding protein (G protein), alpha inhibiting activity polypeptide 2 | 0.95 |
| GNAI3   | guanine nucleotide binding protein (G protein), alpha inhibiting activity polypeptide 3 | 0.47 |
| GNAS    | GNAS complex locus isoform c                                                            | 1.28 |
| GNB1    | guanine nucleotide-binding protein, beta-1 subunit                                      | 2.05 |
| GNB2L1  | guanine nucleotide binding protein (G protein), beta polypeptide 2-like 1               | 2.01 |
| GNL3    | guanine nucleotide binding protein-like 3 isoform 2                                     | 0.69 |
| GORASP2 | golgi reassembly stacking protein 2                                                     | 0.99 |
| GOT1    | aspartate aminotransferase 1                                                            | 1.25 |

|           |                                                                        |      |
|-----------|------------------------------------------------------------------------|------|
| GPI       | glucose phosphate isomerase                                            | 1.13 |
| GPX1      | glutathione peroxidase 1 isoform 1                                     | 0.82 |
| GRB2      | growth factor receptor-bound protein 2 isoform 1                       | 1.29 |
| GSN       | gelsolin isoform a                                                     | 1.13 |
| GSTO1     | glutathione-S-transferase omega 1                                      | 0.49 |
| GSTP1     | glutathione transferase                                                | 1.29 |
| GTF2I     | general transcription factor II, i isoform 4                           | 0.73 |
| H2AFX     | H2A histone family, member X                                           | 2.49 |
| HAGH      | hydroxyacyl glutathione hydrolase isoform 1                            | 0.73 |
| HDAC1     | histone deacetylase 1                                                  | 0.89 |
| HDAC2     | histone deacetylase 2                                                  | 1.08 |
| HK1       | hexokinase 1 isoform HKI-td                                            | 0.98 |
| HMGA1     | high mobility group AT-hook 1 isoform b                                | 1.63 |
| HMGB2     | high-mobility group box 2                                              | 0.72 |
| HN1       | hematological and neurological expressed 1 isoform 1                   | 4.21 |
| HNRNPA1   | heterogeneous nuclear ribonucleoprotein A1 isoform a                   | 1.09 |
| HNRNPA2B1 | heterogeneous nuclear ribonucleoprotein A2/B1 isoform B1               | 1.12 |
| HNRNPC    | heterogeneous nuclear ribonucleoprotein C isoform b                    | 0.55 |
| HNRNPD    | heterogeneous nuclear ribonucleoprotein D isoform d                    | 0.98 |
| HNRNPH1   | heterogeneous nuclear ribonucleoprotein H1                             | 0.42 |
| HNRNPK    | heterogeneous nuclear ribonucleoprotein K isoform a                    | 0.55 |
| HNRPDL    | heterogeneous nuclear ribonucleoprotein D-like                         | 2.11 |
| HPRT1     | hypoxanthine phosphoribosyltransferase 1                               | 1.57 |
| HSP90AA1  | heat shock protein 90kDa alpha (cytosolic), class A member 1 isoform 2 | 0.95 |
| HSP90AB1  | heat shock 90kDa protein 1, beta                                       | 1.77 |
| HSP90B1   | tumor rejection antigen (gp96) 1                                       | 1.46 |
| HSPA1A    | heat shock 70kDa protein 1A                                            | 2.21 |
| HSPA4     | heat shock 70kDa protein 4 isoform a                                   | 1.69 |
| HSPA5     | heat shock 70kDa protein 5                                             | 1.41 |
| HSPA8     | heat shock 70kDa protein 8 isoform 1                                   | 1.96 |
| HSPB1     | heat shock 27kDa protein 1                                             | 0.06 |
| HSPD1     | chaperonin                                                             | 0.66 |
| HSPE1     | heat shock 10kDa protein 1 (chaperonin 10)                             | 0.39 |
| HTT       | huntingtin                                                             | 1.14 |
| HUWE1     | HECT, UBA and WWE domain containing 1                                  | 0.90 |
| HYOU1     | oxygen regulated protein precursor                                     | 1.21 |
| IDI1      | isopentenyl-diphosphate delta isomerase                                | 1.18 |

|          |                                                                 |      |
|----------|-----------------------------------------------------------------|------|
| IFITM1   | interferon induced transmembrane protein 1 (9-27)               | 2.68 |
| IGF2BP1  | insulin-like growth factor 2 mRNA binding protein 1             | 0.67 |
| IGF2BP3  | insulin-like growth factor 2 mRNA binding protein 3             | 0.92 |
| IGF2R    | insulin-like growth factor 2 receptor                           | 0.97 |
| IGFBP2   | insulin-like growth factor binding protein 2, 36kDa             | 0.71 |
| ILK      | integrin-linked kinase                                          | 1.34 |
| IMMT     | inner membrane protein, mitochondrial                           | 1.06 |
| IMPDH2   | inosine monophosphate dehydrogenase 2                           | 0.67 |
| IQGAP1   | IQ motif containing GTPase activating protein 1                 | 1.60 |
| ITGA6    | integrin alpha chain, alpha 6 isoform a                         | 0.91 |
| ITGB1    | integrin beta 1 isoform 1C-2                                    | 1.08 |
| ITGB4    | integrin beta 4 isoform 1                                       | 1.19 |
| KIAA0664 | hypothetical protein LOC23277                                   | 1.01 |
| KIF23    | kinesin family member 23 isoform 2                              | 0.95 |
| KIFC1    | kinesin family member C1                                        | 1.38 |
| KPNA2    | karyopherin alpha 2                                             | 2.83 |
| KRT18    | keratin 18                                                      | 0.38 |
| KRT19    | keratin 19                                                      | 0.88 |
| KTN1     | kinectin 1 isoform b                                            | 0.92 |
| LASP1    | LIM and SH3 protein 1                                           | 1.58 |
| LDHA     | lactate dehydrogenase A                                         | 7.45 |
| LEFTY2   | endometrial bleeding associated factor preproprotein            | 2.40 |
| LGALS1   | beta-galactoside-binding lectin                                 | 2.27 |
| LIG1     | DNA ligase I                                                    | 2.05 |
| LMNB1    | lamin B1                                                        | 0.92 |
| LPP      | LIM domain containing preferred translocation partner in lipoma | 3.66 |
| LRP1     | low density lipoprotein-related protein 1                       | 1.18 |
| LSM3     | Lsm3 protein                                                    | 0.95 |
| LSM7     | U6 snRNA-associated Sm-like protein LSm7                        | 0.60 |
| LYAR     | hypothetical protein FLJ20425                                   | 0.59 |
| M6PRBP1  | mannose 6 phosphate receptor binding protein 1                  | 0.71 |
| MACF1    | microfilament and actin filament cross-linker protein isoform b | 7.18 |
| MAP1B    | microtubule-associated protein 1B isoform 1                     | 0.92 |
| MAP2K2   | mitogen-activated protein kinase kinase 2                       | 0.95 |
| MAPK1    | mitogen-activated protein kinase 1                              | 0.54 |
| MAPRE1   | microtubule-associated protein, RP/EB family, member 1          | 1.20 |
| MAT2A    | methionine adenosyltransferase II, alpha                        | 0.82 |

|         |                                                                       |      |
|---------|-----------------------------------------------------------------------|------|
| MCAM    | melanoma cell adhesion molecule                                       | 1.89 |
| MCM2    | minichromosome maintenance protein 2                                  | 1.05 |
| MCM3    | minichromosome maintenance protein 3                                  | 0.70 |
| MCM4    | minichromosome maintenance protein 4                                  | 1.01 |
| MCM5    | minichromosome maintenance deficient protein 5                        | 0.95 |
| MDH1    | cytosolic malate dehydrogenase                                        | 1.41 |
| MFGE8   | milk fat globule-EGF factor 8 protein                                 | 0.39 |
| MGST1   | microsomal glutathione S-transferase 1                                | 0.29 |
| MIF     | macrophage migration inhibitory factor                                | 0.54 |
| MKI67   | antigen identified by monoclonal antibody Ki-67                       | 0.80 |
| MLL2    | myeloid/lymphoid or mixed-lineage leukemia 2                          | 0.61 |
| MRPL43  | mitochondrial ribosomal protein L43 isoform c                         | 0.93 |
| MRPS23  | mitochondrial ribosomal protein S23                                   | 1.36 |
| MSH2    | mutS homolog 2                                                        | 1.25 |
| MSH6    | mutS homolog 6                                                        | 0.84 |
| MSN     | moesin                                                                | 0.53 |
| MT2A    | metallothionein 2A                                                    | 2.44 |
| MTA1    | metastasis associated protein                                         | 0.76 |
| MTA2    | metastasis-associated protein 2                                       | 1.07 |
| MTHFD1L | methylenetetrahydrofolate dehydrogenase (NADP+ dependent) 1-like      | 3.16 |
| MYH10   | myosin, heavy polypeptide 10, non-muscle                              | 2.31 |
| MYL6    | myosin, light chain 6, alkali, smooth muscle and non-muscle isoform 2 | 1.18 |
| MYO6    | myosin VI                                                             | 0.95 |
| NAMPT   | visfatin precursor                                                    | 0.76 |
| NASP    | nuclear autoantigenic sperm protein isoform 1                         | 0.60 |
| NCAPD2  | chromosome condensation-related SMC-associated protein 1              | 0.62 |
| NCL     | nucleolin                                                             | 0.54 |
| NDUFA13 | cell death-regulatory protein GRIM19                                  | 0.42 |
| NES     | nestin                                                                | 3.94 |
| NME1    | non-metastatic cells 1, protein (NM23A) expressed in isoform b        | 1.45 |
| NME4    | nucleoside-diphosphate kinase 4                                       | 0.44 |
| NOC2L   | nucleolar complex associated 2 homolog                                | 0.52 |
| NP      | purine nucleoside phosphorylase                                       | 1.58 |
| NPEPPS  | aminopeptidase puromycin sensitive                                    | 0.79 |
| NQO1    | NAD(P)H menadione oxidoreductase 1, dioxin-inducible isoform c        | 3.44 |
| NSFL1C  | p47 protein isoform b                                                 | 1.09 |
| NUDT5   | nudix-type motif 5                                                    | 1.07 |



|         |                                                                    |      |
|---------|--------------------------------------------------------------------|------|
| NUP214  | nucleoporin 214kDa                                                 | 1.33 |
| NUP37   | nucleoporin 37kDa                                                  | 1.20 |
| NUP50   | nucleoporin 50kDa isoform b                                        | 0.83 |
| OPA1    | optic atrophy 1 isoform 8                                          | 0.82 |
| P4HA1   | prolyl 4-hydroxylase, alpha I subunit isoform 2                    | 0.80 |
| P4HB    | prolyl 4-hydroxylase, beta subunit precursor                       | 2.33 |
| PA2G4   | ErbB3-binding protein 1                                            | 0.34 |
| PAICS   | phosphoribosylaminoimidazole carboxylase, 2                        | 1.57 |
| PAK1    | p21-activated kinase 1                                             | 2.36 |
| PAK2    | p21-activated kinase 2                                             | 1.24 |
| PARK7   | DJ-1 protein                                                       | 1.82 |
| PARP1   | poly (ADP-ribose) polymerase family, member 1                      | 0.30 |
| PCNA    | proliferating cell nuclear antigen                                 | 0.25 |
| PDCD6IP | programmed cell death 6 interacting protein                        | 0.80 |
| PDIA6   | protein disulfide isomerase-associated 6                           | 2.17 |
| PDS5B   | androgen-induced prostate proliferative shutoff associated protein | 0.76 |
| PDXDC1  | hypothetical protein LOC23042                                      | 1.26 |
| PEA15   | phosphoprotein enriched in astrocytes 15                           | 0.55 |
| PEBP1   | prostatic binding protein                                          | 0.82 |
| PELP1   | proline-, glutamic acid-, leucine-rich protein 1                   | 1.79 |
| PFKP    | phosphofructokinase, platelet                                      | 3.40 |
| PFN1    | profilin 1                                                         | 1.96 |
| PGK1    | phosphoglycerate kinase 1                                          | 0.55 |
| PHGDH   | phosphoglycerate dehydrogenase                                     | 0.06 |
| PIGT    | phosphatidylinositol glycan anchor biosynthesis, class T           | 1.03 |
| PIN1    | protein (peptidyl-prolyl cis/trans isomerase) NIMA-interacting 1   | 1.18 |
| PKM2    | pyruvate kinase 3 isoform 1                                        | 0.95 |
| PKM2    | Pyruvate kinase 3 isoform 1                                        | 1.16 |
| PLCG1   | phospholipase C gamma 1 isoform a                                  | 0.33 |
| PLEC1   | plectin 1 isoform 1                                                | 1.10 |
| PODXL   | podocalyxin-like isoform 1                                         | 0.34 |
| POLR1C  | RNA polymerase I subunit isoform 2                                 | 1.46 |
| PPAT    | phosphoribosyl pyrophosphate amidotransferase proprotein           | 0.96 |
| PPIH    | peptidylprolyl isomerase H                                         | 0.39 |
| PPP1CA  | protein phosphatase 1, catalytic subunit, alpha isoform 3          | 0.95 |
| PPP1CA  | Protein phosphatase 1, catalytic subunit, alpha isoform 1          | 0.99 |
| PPP1CC  | protein phosphatase 1, catalytic subunit, gamma isoform            | 1.12 |

|         |                                                                              |       |
|---------|------------------------------------------------------------------------------|-------|
| PPP2CA  | protein phosphatase 2, catalytic subunit, alpha isoform                      | 1.49  |
| PPP2R1A | alpha isoform of regulatory subunit A, protein phosphatase 2                 | 3.10  |
| PPP2R2A | alpha isoform of regulatory subunit B55, protein phosphatase 2               | 0.96  |
| PPP5C   | protein phosphatase 5, catalytic subunit                                     | 1.05  |
| PPT1    | palmitoyl-protein thioesterase 1                                             | 0.66  |
| PRDX2   | peroxiredoxin 2 isoform a                                                    | 0.39  |
| PRDX6   | peroxiredoxin 6                                                              | 2.21  |
| PRIM1   | DNA primase small subunit, 49kDa                                             | 0.99  |
| PRKAR2B | cAMP-dependent protein kinase, regulatory subunit beta 2                     | 1.16  |
| PRKCI   | protein kinase C, iota                                                       | 1.32  |
| PRKCSH  | protein kinase C substrate 80K-H isoform 2                                   | 0.70  |
| PRKDC   | protein kinase, DNA-activated, catalytic polypeptide isoform 2               | 0.52  |
| PRKDC   | Protein kinase, DNA-activated, catalytic polypeptide isoform 1               | 0.81  |
| PRKRA   | protein kinase, interferon-inducible double stranded RNA dependent activator | 1.41  |
| PRMT1   | HMT1 hnRNP methyltransferase-like 2 isoform 1                                | 0.95  |
| PRPF19  | PRP19/PSO4 pre-mRNA processing factor 19 homolog                             | 0.77  |
| PRPF8   | U5 snRNP-specific protein                                                    | 0.86  |
| PSAP    | prosaposin isoform a preproprotein                                           | 1.11  |
| PSAT1   | phosphoserine aminotransferase isoform 1                                     | 0.58  |
| PSIP1   | PC4 and SFRS1 interacting protein 1 isoform 2                                | 18.20 |
| PSMA2   | proteasome alpha 2 subunit                                                   | 1.04  |
| PSMA6   | proteasome alpha 6 subunit                                                   | 0.05  |
| PSMA7   | proteasome alpha 7 subunit                                                   | 0.96  |
| PSMB5   | proteasome beta 5 subunit                                                    | 1.17  |
| PSMD10  | proteasome 26S non-ATPase subunit 10 isoform 1                               | 0.82  |
| PSMD14  | 26S proteasome-associated pad1 homolog                                       | 1.08  |
| PSME4   | proteasome (prosome, macropain) activator subunit 4                          | 0.99  |
| PTMA    | prothymosin, alpha (gene sequence 28)                                        | 2.99  |
| PTPN11  | protein tyrosine phosphatase, non-receptor type 11                           | 0.37  |
| PTRH2   | Bcl-2 inhibitor of transcription isoform b                                   | 1.19  |
| RAC1    | ras-related C3 botulinum toxin substrate 1 isoform Rac1b                     | 0.87  |
| RAC1    | Ras-related C3 botulinum toxin substrate 1 isoform Rac1b                     | 1.64  |
| RACGAP1 | Rac GTPase activating protein 1                                              | 1.39  |
| RAD23B  | UV excision repair protein RAD23 homolog B                                   | 1.09  |
| RAN     | ras-related nuclear protein                                                  | 0.15  |
| RANBP2  | RAN binding protein 2                                                        | 0.87  |
| RBBP4   | retinoblastoma binding protein 4                                             | 3.16  |

|          |                                                                          |      |
|----------|--------------------------------------------------------------------------|------|
| RBM17    | RNA binding motif protein 17                                             | 1.53 |
| RDX      | radixin                                                                  | 1.41 |
| RET      | ret proto-oncogene isoform a                                             | 2.07 |
| RHOA     | ras homolog gene family, member A                                        | 0.36 |
| RHOC     | ras homolog gene family, member C                                        | 0.89 |
| RPA1     | replication protein A1, 70kDa                                            | 2.38 |
| RPE      | ribulose-5-phosphate-3-epimerase isoform 1                               | 2.00 |
| RPL11    | ribosomal protein L11                                                    | 1.22 |
| RPL19    | ribosomal protein L19                                                    | 1.02 |
| RPL21    | ribosomal protein L21                                                    | 1.04 |
| RPL22    | ribosomal protein L22 proprotein                                         | 1.38 |
| RPL23    | ribosomal protein L23                                                    | 0.55 |
| RPL27    | ribosomal protein L27                                                    | 1.03 |
| RPL4     | ribosomal protein L4                                                     | 1.38 |
| RPL5     | ribosomal protein L5                                                     | 2.00 |
| RPL7     | ribosomal protein L7                                                     | 1.85 |
| RPS11    | ribosomal protein S11                                                    | 1.25 |
| RPS15    | ribosomal protein S15                                                    | 1.85 |
| RPS16    | ribosomal protein S16                                                    | 1.64 |
| RPS19    | ribosomal protein S19                                                    | 1.08 |
| RPS27A   | ubiquitin and ribosomal protein S27a                                     | 1.14 |
| RPS6     | ribosomal protein S6                                                     | 1.12 |
| RPS6KA1  | ribosomal protein S6 kinase, 90kDa, polypeptide 1 isoform b              | 1.12 |
| RTN4     | reticulon 4 isoform A                                                    | 2.13 |
| RUVBL1   | RuvB-like 1                                                              | 4.70 |
| S100A4   | S100 calcium-binding protein A4                                          | 0.75 |
| SACM1L   | suppressor of actin 1                                                    | 1.05 |
| SCP2     | sterol carrier protein 2 isoform 1 proprotein                            | 0.95 |
| SEC31A   | SEC31 homolog A isoform 1                                                | 1.75 |
| SEC63    | SEC63-like protein                                                       | 1.33 |
| SERBP1   | SERPINE1 mRNA binding protein 1 isoform 4                                | 0.98 |
| SERBP1   | SERPINE1 mRNA binding protein 1 isoform 1                                | 1.69 |
| SERPINB9 | serine (or cysteine) proteinase inhibitor, clade B (ovalbumin), member 9 | 5.40 |
| SET      | SET translocation (myeloid leukemia-associated)                          | 4.37 |
| SF1      | splicing factor 1 isoform 3                                              | 0.99 |
| SF3A1    | splicing factor 3a, subunit 1, 120kDa isoform 1                          | 0.77 |
| SH3GL1   | SH3-domain GRB2-like 1                                                   | 0.94 |

|          |                                                                                 |      |
|----------|---------------------------------------------------------------------------------|------|
| SLC25A1  | solute carrier family 25 (mitochondrial carrier; citrate transporter), member 1 | 1.03 |
| SLC25A5  | solute carrier family 25, member 5                                              | 0.15 |
| SLC2A1   | solute carrier family 2 (facilitated glucose transporter), member 1             | 2.94 |
| SLC2A3   | solute carrier family 2 (facilitated glucose transporter), member 3             | 0.18 |
| SLC7A11  | solute carrier family 7, (cationic amino acid transporter, y+ system) member 11 | 3.31 |
| SLC7A3   | solute carrier family 7 (cationic amino acid transporter, y+ system), member 3  | 1.07 |
| SLC7A5   | solute carrier family 7, member 5                                               | 1.56 |
| SLC9A3R1 | solute carrier family 9 (sodium/hydrogen exchanger), isoform 3 regulator 1      | 1.00 |
| SMARCA4  | SWI/SNF-related matrix-associated actin-dependent regulator of chromatin a4     | 0.56 |
| SMARCC1  | SWI/SNF-related matrix-associated actin-dependent regulator of chromatin c1     | 0.80 |
| SMARCE1  | SWI/SNF-related matrix-associated actin-dependent regulator of chromatin e1     | 0.86 |
| SMS      | spermine synthase                                                               | 0.70 |
| SNRPD3   | small nuclear ribonucleoprotein polypeptide D3                                  | 0.26 |
| SNRPF    | small nuclear ribonucleoprotein polypeptide F                                   | 0.38 |
| SPARC    | secreted protein, acidic, cysteine-rich (osteonectin)                           | 0.39 |
| SPTBN1   | spectrin, beta, non-erythrocytic 1 isoform 1                                    | 0.74 |
| SQLE     | squalene monooxygenase                                                          | 0.95 |
| SRM      | spermidine synthase                                                             | 0.24 |
| SSRP1    | structure specific recognition protein 1                                        | 0.04 |
| STAT1    | signal transducer and activator of transcription 1 isoform alpha                | 1.26 |
| STIP1    | stress-induced-phosphoprotein 1 (Hsp70/Hsp90-organizing protein)                | 0.73 |
| STMN1    | stathmin 1                                                                      | 0.50 |
| SUMO1    | SMT3 suppressor of mif two 3 homolog 1 isoform a precursor                      | 0.93 |
| SUPT5H   | suppressor of Ty 5 homolog                                                      | 1.14 |
| TCEA1    | transcription elongation factor A 1 isoform 1                                   | 0.50 |
| TCOF1    | Treacher Collins-Franceschetti syndrome 1 isoform a                             | 0.47 |
| TCOF1    | Treacher Collins-Franceschetti syndrome 1 isoform a                             | 1.61 |
| TCP1     | T-complex protein 1 isoform a                                                   | 0.47 |
| TFRC     | transferrin receptor                                                            | 1.17 |
| TJP1     | tight junction protein 1 isoform a                                              | 4.37 |
| TMPO     | thymopoietin isoform alpha                                                      | 1.38 |
| TNPO3    | transportin 3                                                                   | 0.75 |
| TOP1     | DNA topoisomerase I                                                             | 0.88 |
| TOP2A    | DNA topoisomerase II, alpha isozyme                                             | 1.04 |
| TOP2B    | DNA topoisomerase II, beta isozyme                                              | 4.45 |
| TP53BP1  | tumor protein p53 binding protein, 1                                            | 0.98 |
| TPI1     | triosephosphate isomerase 1                                                     | 0.33 |

|        |                                                                    |      |
|--------|--------------------------------------------------------------------|------|
| TPM1   | tropomyosin 1 alpha chain isoform 3                                | 3.02 |
| TPM3   | tropomyosin 3 isoform 2                                            | 0.60 |
| TPP2   | tripeptidyl peptidase II                                           | 0.64 |
| TPR    | nuclear pore complex-associated protein TPR                        | 1.06 |
| TRAP1  | TNF receptor-associated protein 1                                  | 0.93 |
| TRIM24 | transcriptional intermediary factor 1 alpha isoform a              | 1.53 |
| TRIM28 | tripartite motif-containing 28 protein                             | 2.99 |
| TRIP13 | thyroid hormone receptor interactor 13                             | 1.32 |
| TUBA1C | tubulin alpha 6                                                    | 0.11 |
| TUBB   | tubulin, beta polypeptide                                          | 0.98 |
| TUBB2A | tubulin, beta 2                                                    | 1.80 |
| TUBB2C | tubulin, beta, 2                                                   | 0.32 |
| TUBB3  | tubulin, beta, 4                                                   | 0.86 |
| TXN    | thioredoxin                                                        | 3.40 |
| TXNDC5 | thioredoxin domain containing 5 isoform 1                          | 0.97 |
| U2AF1  | U2 small nuclear RNA auxillary factor 1 isoform b                  | 0.64 |
| U2AF2  | U2 (RNU2) small nuclear RNA auxiliary factor 2 isoform b           | 1.05 |
| UBA1   | ubiquitin-activating enzyme E1                                     | 0.67 |
| UBC    | PREDICTED: similar to Ubiquitin-63E CG11624-PA, isoform A          | 1.77 |
| UBE2C  | ubiquitin-conjugating enzyme E2C isoform 1                         | 0.88 |
| UBE2I  | ubiquitin-conjugating enzyme E2I                                   | 0.92 |
| UBE2N  | ubiquitin-conjugating enzyme E2N                                   | 0.97 |
| UBE3A  | ubiquitin protein ligase E3A isoform 2                             | 0.56 |
| UBTF   | upstream binding transcription factor, RNA polymerase I isoform a  | 0.74 |
| UGCG   | ceramide glucosyltransferase                                       | 1.20 |
| UQCRH  | ubiquinol-cytochrome c reductase hinge protein                     | 1.02 |
| USP14  | ubiquitin specific protease 14 isoform b                           | 1.22 |
| USP7   | ubiquitin specific protease 7 (herpes virus-associated)            | 2.07 |
| VAPA   | vesicle-associated membrane protein-associated protein A isoform 1 | 2.17 |
| VCP    | valosin-containing protein                                         | 1.28 |
| VDAC1  | voltage-dependent anion channel 1                                  | 0.52 |
| VIM    | vimentin                                                           | 0.61 |
| VRK1   | vaccinia related kinase 1                                          | 1.09 |
| VTN    | vitronectin                                                        | 0.44 |
| WARS   | tryptophanyl-tRNA synthetase isoform a                             | 2.99 |
| XPO5   | exportin 5                                                         | 1.11 |
| XRCC5  | ATP-dependent DNA helicase II                                      | 1.15 |

|        |                                                                                |       |
|--------|--------------------------------------------------------------------------------|-------|
| XRCC6  | ATP-dependent DNA helicase II, 70 kDa subunit                                  | 1.45  |
| YBX1   | nuclease sensitive element binding protein 1                                   | 16.00 |
| YWHAE  | tyrosine 3/tryptophan 5 -monooxygenase activation protein, epsilon polypeptide | 1.11  |
| YWHAG  | 14-3-3, gamma                                                                  | 1.03  |
| ZC3H15 | erythropoietin 4 immediate early response                                      | 0.96  |
| ZYX    | zyxin                                                                          | 5.35  |
