# Supplementary material
Source: PubMed Central journal article supplement (PMC3086450)
Supplement: NIHMS283894-supplement-Supplementary_Table_4.pdf [file NIHMS283894-supplement-Supplementary_Table_4.pdf]

**Supplementary Table 4. The common proteins found in meta-analysis across 38 studies of hESC transcriptomes between undifferentiated versus differentiated cells.(Assou et al. 2007[33])**

**Chaerkady et al. - Comparative proteomics of human embryonic stem cells and embryonal carcinoma cells**

| Gene Symbol | Accession | Protein name                                                                       | Sample        | ESC/<br>ECC<br>iTRAQ<br>ratio | p value |
|-------------|-----------|------------------------------------------------------------------------------------|---------------|-------------------------------|---------|
| AARS        | 109148542 | alanyl-tRNA synthetase                                                             | Whole cell    | 2.47                          | 0.20    |
| AASS        | 13027640  | aminoadipate-semialdehyde synthase                                                 | Non-cytosolic | 5.55                          | 0.00    |
| ABCE1       | 108773784 | ATP-binding cassette, sub-family E, member 1                                       | Non-cytosolic | 1.09                          | 0.85    |
| ADNP        | 31563503  | activity-dependent neuroprotector                                                  | Cytosolic     | 0.99                          | 1.00    |
| ADSL        | 4557269   | adenylosuccinate lyase                                                             | Cytosolic     | 1.26                          | 0.65    |
| AGPS        | 4501993   | alkyldihydroxyacetone phosphate synthase                                           | Non-cytosolic | 0.95                          | 0.97    |
| ALDH7A1     | 4557343   | antiquitin                                                                         | Whole cell    | 0.73                          | 0.58    |
| ALPL        | 116734717 | tissue non-specific alkaline phosphatase                                           | Non-cytosolic | 1.17                          | 0.61    |
| APEX1       | 18375505  | APEX nuclease                                                                      | Cytosolic     | 1.71                          | 0.49    |
| API5        | 5729730   | apoptosis inhibitor 5                                                              | Cytosolic     | 0.84                          | 0.56    |
| ARF3        | 4502203   | ADP-ribosylation factor 3                                                          | Cytosolic     | 0.91                          | 0.86    |
| ARFGEF1     | 51479145  | brefeldin A-inhibited guanine nucleotide-exchange protein 1                        | Cytosolic     | 1.17                          | 0.67    |
| ATIC        | 20127454  | 5-aminoimidazole-4-carboxamide ribonucleotide formyltransferase/IMP cyclohydrolase | Cytosolic     | 0.84                          | 0.50    |
| ATP1B3      | 4502281   | Na <sup>+</sup> /K <sup>+</sup> -ATPase beta 3 subunit                             | Whole cell    | 0.29                          | 0.19    |
| BAT1        | 4758112   | HLA-B associated transcript 1                                                      | Whole cell    | 0.08                          | 0.22    |
| BCAT1       | 38176287  | branched chain aminotransferase 1, cytosolic                                       | Cytosolic     | 0.26                          | 0.03    |
| BCCIP       | 7706581   | BRCA2 and CDKN1A-interacting protein isoform BCCIPalpha                            | Whole cell    | 2.00                          | 0.24    |
| BZW1        | 113414197 | PREDICTED: similar to basic leucine zipper and W2 domains 1                        | Non-cytosolic | 0.49                          | 0.35    |
| C14orf115   | 8922686   | hypothetical protein LOC55237                                                      | Non-cytosolic | 0.94                          | 0.84    |
| C1QBP       | 4502491   | complement component 1, q subcomponent binding protein precursor                   | Cytosolic     | 0.91                          | 0.82    |
| C6orf115    | 113418321 | PREDICTED: similar to Protein C6orf115                                             | Cytosolic     | 2.99                          | 0.23    |
| CALU        | 4502551   | calumenin                                                                          | Non-cytosolic | 0.21                          | 0.08    |
| CARHSP1     | 109715858 | calcium-regulated heat-stable protein 1                                            | Whole cell    | 5.50                          | 0.30    |
| CASP3       | 14790119  | caspase 3 preproprotein                                                            | Cytosolic     | 5.40                          | 0.03    |
| CBS         | 4557415   | cystathionine-beta-synthase                                                        | Cytosolic     | 1.45                          | 0.21    |
| CBX5        | 6912292   | chromobox homolog 5 (HP1 alpha homolog, Drosophila)                                | Whole cell    | 0.51                          | 0.33    |
| CCAR1       | 46852388  | cell-cycle and apoptosis regulatory protein 1                                      | Non-cytosolic | 1.42                          | 0.54    |
| CCT5        | 24307939  | chaperonin containing TCP1, subunit 5 (epsilon)                                    | Whole cell    | 1.57                          | 0.35    |
| CCT8        | 48762932  | chaperonin containing TCP1, subunit 8 (theta)                                      | Whole cell    | 0.96                          | 0.03    |

|        |           |                                                                    |               |      |      |
|--------|-----------|--------------------------------------------------------------------|---------------|------|------|
| CD2AP  | 11321634  | CD2-associated protein                                             | Cytosolic     | 1.61 | 0.43 |
| CD9    | 4502693   | CD9 antigen                                                        | Whole cell    | 0.62 | 0.44 |
| CDC2   | 4502709   | cell division cycle 2 protein isoform 1                            | Whole cell    | 1.05 | 0.63 |
| CEBPZ  | 42542392  | CCAAT/enhancer binding protein zeta                                | Non-cytosolic | 0.71 | 0.55 |
| CHD1   | 68299795  | chromodomain helicase DNA binding protein 1                        | Non-cytosolic | 0.86 | 0.62 |
| CHEK1  | 4502803   | CHK1 checkpoint homolog                                            | Non-cytosolic | 0.95 | 0.94 |
| CKAP5  | 57222563  | colonic and hepatic tumor over-expressed protein isoform b         | Whole cell    | 0.94 | 0.90 |
| CLDN6  | 11141863  | claudin 6                                                          | Whole cell    | 0.95 | 0.16 |
| CLIC4  | 7330335   | chloride intracellular channel 4                                   | Whole cell    | 2.03 | 0.36 |
| CRABP1 | 4758052   | cellular retinoic acid binding protein 1                           | Whole cell    | 1.32 | 0.44 |
| CRABP2 | 4503029   | cellular retinoic acid binding protein 2                           | Whole cell    | 0.23 | 0.13 |
| CRKL   | 4885153   | v-crk sarcoma virus CT10 oncogene homolog (avian)-like             | Whole cell    | 0.54 | 0.37 |
| CSE1L  | 29029559  | CSE1 chromosome segregation 1-like protein                         | Whole cell    | 0.26 | 0.10 |
| CSRP2  | 4503101   | cysteine and glycine-rich protein 2                                | Non-cytosolic | 0.60 | 0.43 |
| CTBP2  | 12746590  | C-terminal binding protein 2 isoform 2                             | Cytosolic     | 1.13 | 0.74 |
| CTPS2  | 28559085  | cytidine triphosphate synthase II                                  | Cytosolic     | 0.74 | 0.59 |
| CTSC   | 4503141   | cathepsin C isoform a preproprotein                                | Non-cytosolic | 0.57 | 0.25 |
| CXADR  | 4503173   | coxsackie virus and adenovirus receptor                            | Non-cytosolic | 0.74 | 0.59 |
| CYP2S1 | 13449277  | cytochrome P450, family 2, subfamily S, polypeptide 1              | Non-cytosolic | 1.54 | 0.43 |
| DDX18  | 38327634  | DEAD (Asp-Glu-Ala-Asp) box polypeptide 18                          | Non-cytosolic | 0.76 | 0.78 |
| DDX21  | 50659095  | DEAD (Asp-Glu-Ala-Asp) box polypeptide 21                          | Cytosolic     | 1.10 | 0.46 |
| DEK    | 4503249   | DEK oncogene                                                       | Whole cell    | 0.06 | 0.02 |
| DHX9   | 100913206 | DEAH (Asp-Glu-Ala-His) box polypeptide 9                           | Cytosolic     | 0.45 | 0.00 |
| DKC1   | 4503337   | dyskerin                                                           | Cytosolic     | 0.61 | 0.32 |
| DLAT   | 31711992  | dihydrolipoamide S-acetyltransferase                               | Whole cell    | 1.63 | 0.39 |
| DNMT3A | 28559069  | DNA cytosine methyltransferase 3 alpha isoform a                   | Whole cell    | 0.78 | 0.65 |
| DNMT3B | 5901940   | DNA cytosine-5 methyltransferase 3 beta isoform 1                  | Non-cytosolic | 5.65 | 0.01 |
| DPP3   | 86792661  | dipeptidyl peptidase III                                           | Whole cell    | 3.28 | 0.32 |
| DPPA4  | 52353966  | developmental pluripotency associated 4                            | Whole cell    | 1.89 | 0.00 |
| DPYSL3 | 4503379   | dihydropyrimidinase-like 3                                         | Cytosolic     | 1.14 | 0.51 |
| DUT    | 70906441  | dUTP pyrophosphatase isoform 1 precursor                           | Cytosolic     | 1.13 | 0.65 |
| EEF1A1 | 4503471   | eukaryotic translation elongation factor 1 alpha 1                 | Cytosolic     | 1.72 | 0.05 |
| EEF1E1 | 4758862   | eukaryotic translation elongation factor 1 epsilon 1               | Cytosolic     | 0.94 | 0.96 |
| EIF2S1 | 4758256   | eukaryotic translation initiation factor 2, subunit 1 alpha, 35kDa | Whole cell    | 0.83 | 0.32 |
| EIF4A1 | 4503529   | eukaryotic translation initiation factor 4A isoform 1              | Cytosolic     | 1.80 | 0.18 |
| EIF4E  | 4503535   | eukaryotic translation initiation factor 4E                        | Whole cell    | 4.17 | 0.17 |
| EIF5B  | 84043963  | eukaryotic translation initiation factor 5B                        | Cytosolic     | 0.83 | 0.60 |

|         |           |                                                                      |               |       |      |
|---------|-----------|----------------------------------------------------------------------|---------------|-------|------|
| ENAH    | 56549694  | enabled homolog isoform a                                            | Whole cell    | 0.06  | 0.27 |
| ENO2    | 5803011   | enolase 2                                                            | Cytosolic     | 0.35  | 0.11 |
| EPHA1   | 56119207  | ephrin receptor EphA1                                                | Non-cytosolic | 1.13  | 0.79 |
| EPRS    | 62241042  | glutamyl-prolyl tRNA synthetase                                      | Cytosolic     | 0.89  | 0.34 |
| ETV1    | 31742534  | ets variant gene 1                                                   | Non-cytosolic | 14.19 | 0.15 |
| FABP5   | 4557581   | fatty acid binding protein 5 (psoriasis-associated)                  | Cytosolic     | 2.81  | 0.03 |
| FEN1    | 4758356   | flap structure-specific endonuclease 1                               | Whole cell    | 0.99  | 0.20 |
| FKBP3   | 4503727   | FK506-binding protein 3                                              | Non-cytosolic | 1.87  | 0.19 |
| FKBP5   | 4758384   | FK506 binding protein 5                                              | Cytosolic     | 0.74  | 0.60 |
| FUBP1   | 17402900  | far upstream element-binding protein                                 | Non-cytosolic | 1.94  | 0.25 |
| FXR1    | 61835148  | fragile X mental retardation-related protein 1 isoform a             | Whole cell    | 0.74  | 0.30 |
| G3BP2   | 45359849  | Ras-GTPase activating protein SH3 domain-binding protein 2 isoform a | Cytosolic     | 1.16  | 0.76 |
| GART    | 4503915   | phosphoribosylglycinamide formyltransferase                          | Whole cell    | 0.77  | 0.15 |
| GDF3    | 10190670  | growth differentiation factor 3                                      | Non-cytosolic | 0.33  | 0.23 |
| GEMIN4  | 122939157 | gemin 4                                                              | Non-cytosolic | 1.49  | 0.37 |
| GJA1    | 4504001   | connexin 43                                                          | Whole cell    | 2.73  | 0.24 |
| GLDC    | 108773801 | glycine dehydrogenase (decarboxylating)                              | Non-cytosolic | 2.38  | 0.04 |
| GMFB    | 4758442   | glia maturation factor, beta                                         | Whole cell    | 2.44  | 0.26 |
| GNL2    | 7019419   | guanine nucleotide binding protein-like 2 (nucleolar)                | Whole cell    | 1.28  | 0.62 |
| GNL3    | 45643129  | guanine nucleotide binding protein-like 3 isoform 2                  | Cytosolic     | 0.69  | 0.43 |
| GPC4    | 21614525  | glypican 4                                                           | Non-cytosolic | 0.99  | 1.00 |
| H2AFX   | 4504253   | H2A histone family, member X                                         | Whole cell    | 2.49  | 0.10 |
| HDAC2   | 116284376 | histone deacetylase 2                                                | Whole cell    | 1.08  | 0.87 |
| HELLS   | 21914927  | helicase, lymphoid-specific                                          | Whole cell    | 0.13  | 0.12 |
| HMGA1   | 22208977  | high mobility group AT-hook 1 isoform a                              | Whole cell    | 4.97  | 0.05 |
| HMGB2   | 11321591  | high-mobility group box 2                                            | Whole cell    | 0.72  | 0.30 |
| HMGB3   | 71143137  | high-mobility group box 3                                            | Non-cytosolic | 1.51  | 0.48 |
| HSD17B4 | 4504505   | hydroxysteroid (17-beta) dehydrogenase 4                             | Whole cell    | 0.69  | 0.46 |
| HSPA4   | 38327039  | heat shock 70kDa protein 4 isoform a                                 | Cytosolic     | 1.69  | 0.11 |
| HSPA8   | 5729877   | heat shock 70kDa protein 8 isoform 1                                 | Cytosolic     | 1.96  | 0.00 |
| HSPD1   | 41399285  | chaperonin                                                           | Cytosolic     | 0.66  | 0.13 |
| HSPE1   | 4504523   | heat shock 10kDa protein 1 (chaperonin 10)                           | Non-cytosolic | 0.39  | 0.34 |
| IDH1    | 28178825  | isocitrate dehydrogenase 1 (NADP+), soluble                          | Cytosolic     | 1.38  | 0.18 |
| IFITM1  | 40254450  | interferon induced transmembrane protein 1 (9-27)                    | Whole cell    | 2.68  | 0.24 |
| IGFBP2  | 55925576  | insulin-like growth factor binding protein 2, 36kDa                  | Non-cytosolic | 0.71  | 0.57 |
| ILF3    | 24234756  | interleukin enhancer binding factor 3 isoform c                      | Cytosolic     | 0.66  | 0.08 |
| IMPA1   | 5031789   | inositol(myo)-1(or 4)-monophosphatase 1                              | Cytosolic     | 1.57  | 0.37 |

|          |           |                                                      |               |      |      |
|----------|-----------|------------------------------------------------------|---------------|------|------|
| IMPDH2   | 66933016  | inosine monophosphate dehydrogenase 2                | Cytosolic     | 0.67 | 0.42 |
| IPO7     | 5453998   | importin 7                                           | Cytosolic     | 0.67 | 0.34 |
| IPO9     | 21361659  | importin 9                                           | Cytosolic     | 0.67 | 0.49 |
| ITGA6    | 119395740 | integrin alpha chain, alpha 6 isoform a              | Non-cytosolic | 0.91 | 0.69 |
| KIAA0020 | 109948283 | KIAA0020 protein                                     | Non-cytosolic | 0.80 | 0.68 |
| KIAA1553 | 88999401  | PREDICTED: hypothetical protein LOC57673             | Non-cytosolic | 1.19 | 0.72 |
| KIF23    | 6754472   | kinesin family member 23 isoform 2                   | Non-cytosolic | 0.95 | 0.98 |
| KIF2C    | 5803082   | kinesin family member 2C                             | Non-cytosolic | 1.28 | 0.63 |
| KPNA2    | 4504897   | karyopherin alpha 2                                  | Whole cell    | 2.83 | 0.01 |
| KRT18    | 4557888   | keratin 18                                           | Cytosolic     | 0.38 | 0.03 |
| KRT8     | 4504919   | keratin 8                                            | Whole cell    | 0.16 | 0.00 |
| LARS     | 108773810 | leucyl-tRNA synthetase                               | Cytosolic     | 1.06 | 0.45 |
| LEFTY1   | 10337603  | left-right determination, factor B preproprotein     | Non-cytosolic | 2.01 | 0.11 |
| LEFTY2   | 27436881  | endometrial bleeding associated factor preproprotein | Whole cell    | 2.40 | 0.24 |
| LGALS1   | 4504981   | beta-galactoside-binding lectin                      | Whole cell    | 2.27 | 0.29 |
| LIG1     | 4557719   | DNA ligase I                                         | Whole cell    | 2.05 | 0.32 |
| LIN28    | 13375938  | lin-28 homolog                                       | Cytosolic     | 0.58 | 0.17 |
| LMNB1    | 5031877   | lamin B1                                             | Whole cell    | 0.92 | 0.21 |
| LMNB2    | 27436951  | lamin B2                                             | Whole cell    | 0.90 | 0.66 |
| LPHN2    | 6912464   | latrophilin 2                                        | Non-cytosolic | 0.86 | 0.74 |
| LSM7     | 7706423   | U6 snRNA-associated Sm-like protein LSM7             | Cytosolic     | 0.60 | 0.43 |
| LUC7L    | 8922297   | LUC7-like isoform a                                  | Non-cytosolic | 0.85 | 0.50 |
| LYAR     | 8923398   | hypothetical protein FLJ20425                        | Non-cytosolic | 0.59 | 0.31 |
| M6PR     | 4505061   | cation-dependent mannose-6-phosphate receptor        | Whole cell    | 0.97 | 0.57 |
| MARS     | 14043022  | methionine-tRNA synthetase                           | Cytosolic     | 1.04 | 0.86 |
| MAT2A    | 5174529   | methionine adenosyltransferase II, alpha             | Whole cell    | 0.82 | 0.60 |
| MAT2B    | 11034825  | methionine adenosyltransferase II, beta isoform 1    | Whole cell    | 1.28 | 0.63 |
| MATR3    | 62750354  | matrin 3                                             | Cytosolic     | 0.65 | 0.20 |
| MCM2     | 33356547  | minichromosome maintenance protein 2                 | Cytosolic     | 1.05 | 0.39 |
| MCM3     | 6631095   | minichromosome maintenance protein 3                 | Whole cell    | 0.70 | 0.52 |
| MCM4     | 33469919  | minichromosome maintenance protein 4                 | Cytosolic     | 1.01 | 0.91 |
| MCM5     | 23510448  | minichromosome maintenance deficient protein 5       | Cytosolic     | 0.95 | 0.78 |
| MCM6     | 7427519   | minichromosome maintenance deficient 6               | Whole cell    | 0.44 | 0.33 |
| MCM7     | 33469968  | minichromosome maintenance protein 7 isoform 1       | Whole cell    | 0.58 | 0.04 |
| MDN1     | 24415404  | MDN1, midasin homolog                                | Non-cytosolic | 1.94 | 0.08 |
| METAP1   | 24308009  | methionyl aminopeptidase 1                           | Non-cytosolic | 0.88 | 0.78 |
| MFGE8    | 5174557   | milk fat globule-EGF factor 8 protein                | Whole cell    | 0.39 | 0.13 |

|         |          |                                                                |               |      |      |
|---------|----------|----------------------------------------------------------------|---------------|------|------|
| MGEA5   | 11024698 | meningioma expressed antigen 5 (hyaluronidase)                 | Cytosolic     | 1.03 | 0.92 |
| MGST1   | 9945306  | microsomal glutathione S-transferase 1                         | Non-cytosolic | 0.29 | 0.13 |
| MKI67IP | 21314753 | MKI67 (FHA domain) interacting nucleolar phosphoprotein        | Whole cell    | 2.23 | 0.28 |
| MRPS9   | 33188463 | mitochondrial ribosomal protein S9                             | Non-cytosolic | 0.92 | 0.89 |
| MSH2    | 4557761  | mutS homolog 2                                                 | Non-cytosolic | 1.25 | 0.25 |
| MSH6    | 4504191  | mutS homolog 6                                                 | Whole cell    | 0.84 | 0.30 |
| MTA3    | 50838795 | metastasis associated 1 family, member 3                       | Non-cytosolic | 0.77 | 0.60 |
| MTHFD1  | 13699868 | methylenetetrahydrofolate dehydrogenase 1                      | Cytosolic     | 2.25 | 0.04 |
| MTHFD2  | 94721354 | methylene tetrahydrofolate dehydrogenase 2 isoform A           | Whole cell    | 3.94 | 0.18 |
| NAP1L1  | 4758756  | nucleosome assembly protein 1-like 1                           | Cytosolic     | 0.59 | 0.18 |
| NARG1   | 17149828 | NMDA receptor regulated 1                                      | Cytosolic     | 1.00 | 0.86 |
| NASP    | 27262628 | nuclear autoantigenic sperm protein isoform 2                  | Whole cell    | 2.44 | 0.00 |
| NCL     | 55956788 | nucleolin                                                      | Whole cell    | 0.54 | 0.27 |
| NLN     | 14149738 | neurolysin                                                     | Whole cell    | 0.93 | 0.89 |
| NME1    | 4557797  | non-metastatic cells 1, protein (NM23A) expressed in isoform b | Whole cell    | 1.45 | 0.46 |
| NOLC1   | 4758860  | nucleolar and coiled-body phosphoprotein 1                     | Non-cytosolic | 1.15 | 0.77 |
| NP      | 4557801  | purine nucleoside phosphorylase                                | Cytosolic     | 1.58 | 0.43 |
| NPM1    | 40353734 | nucleophosmin 1 isoform 2                                      | Non-cytosolic | 1.80 | 0.23 |
| NUDT5   | 37594464 | nudix-type motif 5                                             | Cytosolic     | 1.07 | 0.86 |
| NUP160  | 54859722 | nucleoporin 160kDa                                             | Whole cell    | 0.68 | 0.51 |
| NUP205  | 57634534 | nucleoporin 205kDa                                             | Non-cytosolic | 1.12 | 0.63 |
| NUP35   | 31982904 | nucleoporin 35kDa isoform a                                    | Non-cytosolic | 0.91 | 0.87 |
| NUP37   | 34222121 | nucleoporin 37kDa                                              | Whole cell    | 1.20 | 0.38 |
| NUP54   | 26051237 | nucleoporin 54kDa                                              | Whole cell    | 0.22 | 0.16 |
| PAICS   | 5453539  | phosphoribosylaminoimidazole carboxylase, 2                    | Cytosolic     | 1.57 | 0.55 |
| PAK1    | 42794769 | p21-activated kinase 1                                         | Whole cell    | 2.36 | 0.27 |
| PARP1   | 4501955  | poly (ADP-ribose) polymerase family, member 1                  | Non-cytosolic | 0.30 | 0.00 |
| PCNA    | 4505641  | proliferating cell nuclear antigen                             | Whole cell    | 0.25 | 0.03 |
| PFAS    | 31657129 | phosphoribosylformylglycinamide synthase                       | Cytosolic     | 2.21 | 0.06 |
| PFN1    | 4826898  | profilin 1                                                     | Cytosolic     | 1.96 | 0.02 |
| PGK1    | 4505763  | phosphoglycerate kinase 1                                      | Cytosolic     | 0.55 | 0.03 |
| PGM1    | 21361621 | phosphoglucomutase 1                                           | Cytosolic     | 0.53 | 0.09 |
| PIPOX   | 60499001 | L-pipecolic acid oxidase                                       | Non-cytosolic | 0.50 | 0.45 |
| PLS3    | 7549809  | plastin 3                                                      | Cytosolic     | 1.46 | 0.25 |
| PNN     | 33356174 | pinin, desmosome associated protein                            | Non-cytosolic | 1.21 | 0.70 |
| PODXL   | 66277202 | podocalyxin-like isoform 1                                     | Non-cytosolic | 0.34 | 0.20 |
| POLR1B  | 33469941 | RNA polymerase I polypeptide B                                 | Cytosolic     | 0.74 | 0.59 |

|          |           |                                                                          |               |       |      |
|----------|-----------|--------------------------------------------------------------------------|---------------|-------|------|
| PPAT     | 29570798  | phosphoribosyl pyrophosphate amidotransferase proprotein                 | Whole cell    | 0.96  | 0.71 |
| PPP1CC   | 4506007   | protein phosphatase 1, catalytic subunit, gamma isoform                  | Whole cell    | 1.12  | 0.86 |
| PRDX1    | 4505591   | peroxiredoxin 1                                                          | Cytosolic     | 0.64  | 0.08 |
| PRDX2    | 32189392  | peroxiredoxin 2 isoform a                                                | Cytosolic     | 0.39  | 0.03 |
| PRIM1    | 4506051   | DNA primase small subunit, 49kDa                                         | Cytosolic     | 0.99  | 0.99 |
| PRKCI    | 48255885  | protein kinase C, iota                                                   | Cytosolic     | 1.32  | 0.57 |
| PRKDC    | 126032350 | protein kinase, DNA-activated, catalytic polypeptide isoform 2           | Non-cytosolic | 0.52  | 0.00 |
| PRPS1    | 4506127   | phosphoribosyl pyrophosphate synthetase 1                                | Whole cell    | 0.17  | 0.07 |
| PSIP1    | 19923653  | PC4 and SFRS1 interacting protein 1 isoform 2                            | Whole cell    | 18.20 | 0.01 |
| PSMA2    | 4506181   | proteasome alpha 2 subunit                                               | Cytosolic     | 1.04  | 0.67 |
| PSMA3    | 4506183   | proteasome alpha 3 subunit isoform 1                                     | Whole cell    | 0.36  | 0.10 |
| PSME3    | 30410796  | proteasome activator subunit 3 isoform 2                                 | Whole cell    | 0.67  | 0.61 |
| PTBP1    | 4506243   | polypyrimidine tract-binding protein 1 isoform a                         | Whole cell    | 0.88  | 0.13 |
| PYCR2    | 21361454  | pyrroline-5-carboxylate reductase family, member 2                       | Non-cytosolic | 1.11  | 0.82 |
| RBM14    | 5454064   | RNA binding motif protein 14                                             | Whole cell    | 0.82  | 0.71 |
| RBPM2    | 34915990  | RNA binding protein with multiple splicing 2                             | Non-cytosolic | 1.66  | 0.41 |
| RECQL    | 14591904  | RecQ protein-like isoform 1                                              | Non-cytosolic | 0.80  | 0.56 |
| RET      | 10862703  | ret proto-oncogene isoform a                                             | Whole cell    | 2.07  | 0.31 |
| RFC3     | 4506489   | replication factor C 3 isoform 1                                         | Non-cytosolic | 0.99  | 0.99 |
| RIF1     | 56676335  | RAP1 interacting factor 1                                                | Non-cytosolic | 0.88  | 0.74 |
| RPA3     | 4506587   | replication protein A3, 14kDa                                            | Whole cell    | 1.56  | 0.45 |
| RPL12    | 4506597   | ribosomal protein L12                                                    | Whole cell    | 1.09  | 0.16 |
| RPL24    | 4506619   | ribosomal protein L24                                                    | Non-cytosolic | 1.38  | 0.43 |
| RPL4     | 16579885  | ribosomal protein L4                                                     | Cytosolic     | 1.38  | 0.11 |
| RPL6     | 67189747  | ribosomal protein L6                                                     | Whole cell    | 0.94  | 0.33 |
| RPL7     | 15431301  | ribosomal protein L7                                                     | Cytosolic     | 1.85  | 0.08 |
| RPLP0    | 4506667   | ribosomal protein P0                                                     | Whole cell    | 1.63  | 0.28 |
| RPS19    | 4506695   | ribosomal protein S19                                                    | Non-cytosolic | 1.08  | 0.29 |
| RPS2     | 15055539  | ribosomal protein S2                                                     | Non-cytosolic | 1.42  | 0.21 |
| RPS24    | 4506703   | ribosomal protein S24 isoform c                                          | Cytosolic     | 1.04  | 0.74 |
| RRAS2    | 21361416  | related RAS viral (r-ras) oncogene homolog 2                             | Non-cytosolic | 1.12  | 0.77 |
| RUVBL1   | 4506753   | RuvB-like 1                                                              | Whole cell    | 4.70  | 0.06 |
| SEPHS1   | 24797148  | selenophosphate synthetase                                               | Whole cell    | 2.15  | 0.24 |
| SERPINB9 | 4758906   | serine (or cysteine) proteinase inhibitor, clade B (ovalbumin), member 9 | Cytosolic     | 5.40  | 0.01 |
| SERPINH1 | 32454741  | serine (or cysteine) proteinase inhibitor, clade H, member 1             | Non-cytosolic | 1.09  | 0.10 |
| SET      | 4506891   | SET translocation (myeloid leukemia-associated)                          | Whole cell    | 4.37  | 0.21 |
| SF3A1    | 5032087   | splicing factor 3a, subunit 1, 120kDa isoform 1                          | Non-cytosolic | 0.77  | 0.64 |

|         |           |                                                                                |               |      |      |
|---------|-----------|--------------------------------------------------------------------------------|---------------|------|------|
| SFRP1   | 56117838  | secreted frizzled-related protein 1                                            | Whole cell    | 0.64 | 0.47 |
| SFRS1   | 5902076   | splicing factor, arginine/serine-rich 1 isoform 1                              | Cytosolic     | 0.56 | 0.18 |
| SFRS11  | 4759100   | splicing factor, arginine/serine-rich 11                                       | Whole cell    | 0.19 | 0.15 |
| SFRS7   | 72534660  | splicing factor, arginine/serine-rich 7                                        | Whole cell    | 0.32 | 0.21 |
| SLC16A1 | 115583685 | solute carrier family 16, member 1                                             | Whole cell    | 1.51 | 0.54 |
| SLC1A5  | 5032093   | solute carrier family 1 (neutral amino acid transporter), member 5             | Whole cell    | 1.17 | 0.69 |
| SLC29A1 | 4826716   | equilibrative nucleoside transporter 1                                         | Non-cytosolic | 0.93 | 0.97 |
| SLC2A3  | 5902090   | solute carrier family 2 (facilitated glucose transporter), member 3            | Whole cell    | 0.18 | 0.15 |
| SLC3A2  | 65506891  | solute carrier family 3 member 2 isoform c                                     | Non-cytosolic | 3.28 | 0.00 |
| SLC7A3  | 114326550 | solute carrier family 7 (cationic amino acid transporter, y+ system), member 3 | Non-cytosolic | 1.07 | 0.69 |
| SMARCA5 | 21071058  | SWI/SNF-related matrix-associated actin-dependent regulator of chromatin a5    | Whole cell    | 0.04 | 0.02 |
| SMS     | 21264341  | spermine synthase                                                              | Whole cell    | 0.70 | 0.54 |
| SNRPA   | 4759156   | small nuclear ribonucleoprotein polypeptide A                                  | Whole cell    | 0.95 | 0.96 |
| SNRPA1  | 50593002  | small nuclear ribonucleoprotein polypeptide A'                                 | Cytosolic     | 0.83 | 0.73 |
| SNRPD2  | 4759158   | small nuclear ribonucleoprotein polypeptide D2                                 | Whole cell    | 0.96 | 0.94 |
| SNRPD3  | 4759160   | small nuclear ribonucleoprotein polypeptide D3                                 | Whole cell    | 0.26 | 0.26 |
| SNRPF   | 4507131   | small nuclear ribonucleoprotein polypeptide F                                  | Whole cell    | 0.38 | 0.25 |
| SNRPN   | 4507135   | small nuclear ribonucleoprotein polypeptide N                                  | Non-cytosolic | 1.07 | 0.46 |
| SRP72   | 109638749 | signal recognition particle 72kDa                                              | Whole cell    | 2.61 | 0.25 |
| SRRM1   | 42542379  | serine/arginine repetitive matrix 1                                            | Cytosolic     | 0.71 | 0.46 |
| SSB     | 10835067  | autoantigen La                                                                 | Whole cell    | 1.39 | 0.71 |
| SSBP1   | 4507231   | single-stranded DNA binding protein 1                                          | Whole cell    | 1.06 | 0.43 |
| STRBP   | 21361745  | spermatid perinuclear RNA-binding protein                                      | Non-cytosolic | 0.90 | 0.84 |
| SUPT16H | 6005757   | chromatin-specific transcription elongation factor large subunit               | Whole cell    | 1.01 | 0.93 |
| TARS    | 38202255  | threonyl-tRNA synthetase                                                       | Cytosolic     | 2.47 | 0.00 |
| TCEA1   | 5803191   | transcription elongation factor A 1 isoform 1                                  | Whole cell    | 0.50 | 0.33 |
| TFRC    | 4507457   | transferrin receptor                                                           | Whole cell    | 1.17 | 0.30 |
| THY1    | 19923362  | Thy-1 cell surface antigen                                                     | Whole cell    | 0.38 | 0.25 |
| TKT     | 4507521   | transketolase                                                                  | Cytosolic     | 1.92 | 0.02 |
| TMPO    | 73760405  | thymopoietin isoform beta                                                      | Non-cytosolic | 0.72 | 0.19 |
| TNPO1   | 23510381  | transportin 1                                                                  | Whole cell    | 1.39 | 0.31 |
| TNPO3   | 6912734   | transportin 3                                                                  | Cytosolic     | 0.75 | 0.57 |
| TOP2A   | 19913406  | DNA topoisomerase II, alpha isozyme                                            | Non-cytosolic | 1.04 | 0.91 |
| TPM1    | 63252900  | tropomyosin 1 alpha chain isoform 4                                            | Cytosolic     | 0.52 | 0.07 |
| TPM3    | 114155144 | tropomyosin 3 isoform 4                                                        | Whole cell    | 1.15 | 0.35 |
| TUBB    | 29788785  | tubulin, beta polypeptide                                                      | Whole cell    | 0.98 | 0.42 |
| TUBB6   | 14210536  | tubulin, beta 6                                                                | Cytosolic     | 1.03 | 0.88 |

|       |          |                                                                   |               |       |      |
|-------|----------|-------------------------------------------------------------------|---------------|-------|------|
| UBA2  | 4885649  | SUMO-1 activating enzyme subunit 2                                | Whole cell    | 2.88  | 0.22 |
| UBE2C | 32967285 | ubiquitin-conjugating enzyme E2C isoform 3                        | Whole cell    | 1.64  | 0.42 |
| UCHL1 | 21361091 | ubiquitin carboxyl-terminal esterase L1 (ubiquitin thiolesterase) | Cytosolic     | 2.78  | 0.01 |
| UGP2  | 48255966 | UDP-glucose pyrophosphorylase 2 isoform a                         | Whole cell    | 5.35  | 0.01 |
| UQCRH | 83627705 | ubiquinol-cytochrome c reductase hinge protein                    | Non-cytosolic | 1.02  | 0.95 |
| UTF1  | 71043876 | undifferentiated embryonic cell transcription factor 1            | Whole cell    | 14.72 | 0.02 |
| VBP1  | 4507873  | von Hippel-Lindau binding protein 1                               | Whole cell    | 0.59  | 0.41 |
| VRK1  | 4507903  | vaccinia related kinase 1                                         | Non-cytosolic | 1.09  | 0.59 |
| VSNL1 | 21361559 | visinin-like 1                                                    | Whole cell    | 1.82  | 0.35 |
| WDHD1 | 5901892  | WD repeat and HMG-box DNA binding protein 1 isoform 1             | Whole cell    | 0.70  | 0.54 |
| WDR12 | 16445424 | WD repeat domain 12 protein                                       | Whole cell    | 2.11  | 0.40 |
| WDR3  | 5803221  | WD repeat-containing protein 3                                    | Whole cell    | 18.37 | 0.04 |
| XPO1  | 4507943  | exportin 1                                                        | Non-cytosolic | 1.04  | 0.82 |
| XRCC5 | 10863945 | ATP-dependent DNA helicase II                                     | Non-cytosolic | 1.15  | 0.17 |
