# Supplementary material
Source: PubMed Central journal article supplement (PMC3086450)
Supplement: NIHMS283894-supplement-Supplementary_Table_5.pdf [file NIHMS283894-supplement-Supplementary_Table_5.pdf]

Supplementary Table 5. The comparison of iTRAQ ratios of common proteins found in three experiments (Whole cell, cytosolic and non-cytosolic). Chaerkady et al. - Comparative proteomics of human embryonic stem cells and embryonal carcinoma cells

| Gene Symbol | Whole Cell<br>iTRAQ Ratio<br>ESC/ECC | Cytosolic<br>iTRAQ Ratio<br>ESC/ECC |
|-------------|--------------------------------------|-------------------------------------|
| SMARCC1     | 1.18                                 | 0.89                                |
| HSPA5       | 2.38                                 | 1.45                                |
| HSPA4       | 1.73                                 | 1.91                                |
| SUMO1       | 0.66                                 | 0.85                                |
| HSPA9       | 2.34                                 | 1.02                                |
| HSPA8       | 3.39                                 | 1.95                                |
| FKBP4       | 0.13                                 | 0.35                                |
| ANP32E      | 1.14                                 | 0.6                                 |
| ANP32B      | 0.43                                 | 0.57                                |
| ANP32A      | 0.54                                 | 0.76                                |
| DBN1        | 8.96                                 | 0.98                                |
| ADD1        | 3.57                                 | 1.04                                |
| C21orf70    | 1.51                                 | 1.13                                |
| ATP6V1B2    | 1.33                                 | 0.68                                |
| NDUFAB1     | 0.81                                 | 0.28                                |
| RUVBL2      | 1.26                                 | 1.2                                 |
| PPP2R4      | 0.33                                 | 0.7                                 |
| DHX9        | 0.87                                 | 0.42                                |
| PLEC1       | 1.93                                 | 1.11                                |
| DIAPH1      | 0.68                                 | 0.85                                |
| WDR1        | 1.00                                 | 1.19                                |
| CTNBL1      | 0.27                                 | 0.73                                |
| PPP2R2A     | 0.99                                 | 0.96                                |
| BCAT1       | 1.46                                 | 0.23                                |
| FXR1        | 0.77                                 | 0.85                                |
| CNDP2       | 3.83                                 | 1.68                                |
| AHSA1       | 0.97                                 | 0.95                                |
| MYL6        | 1.15                                 | 1.55                                |
| HNRPDL      | 0.76                                 | 0.79                                |
| PPIL1       | 0.85                                 | 1.14                                |
| WHSC2       | 0.26                                 | 0.82                                |

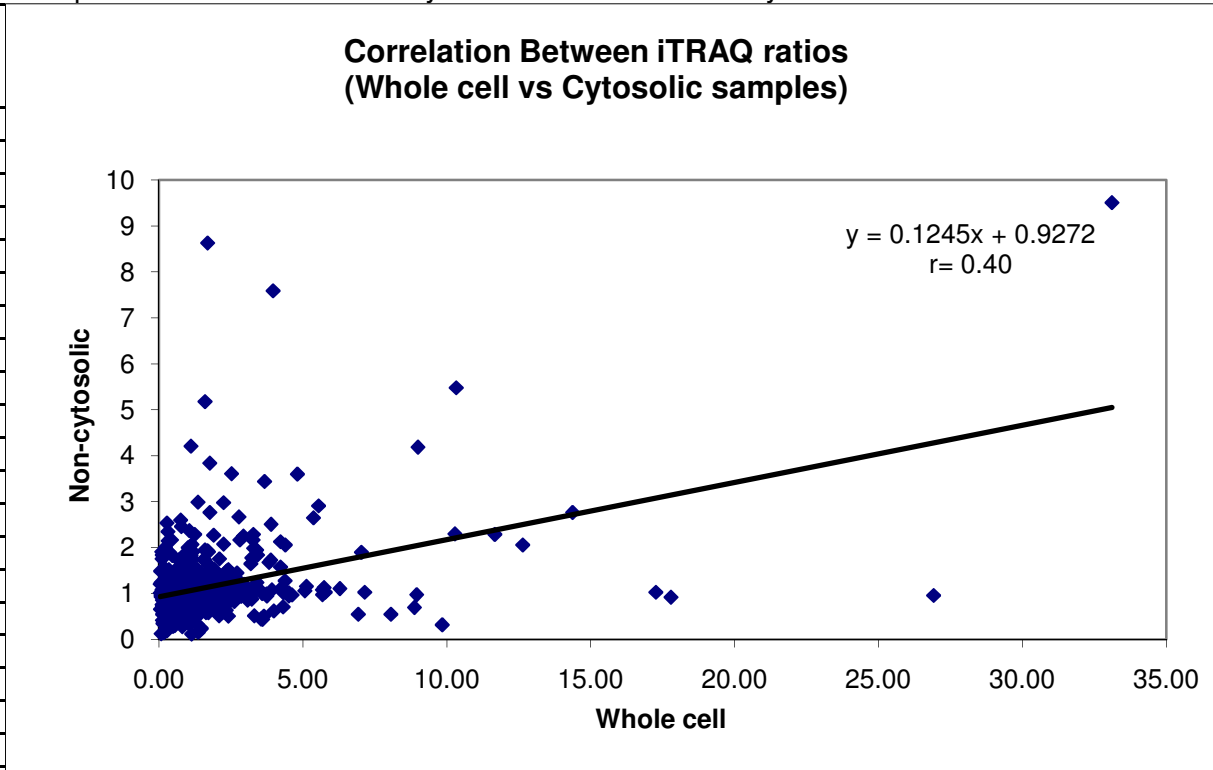

|           |       |      |
|-----------|-------|------|
| PSMB6     | 1.25  | 1.32 |
| ACLY      | 1.76  | 1.32 |
| YBX1      | 17.27 | 1.03 |
| TSN       | 1.12  | 0.69 |
| ATP6V1A   | 1.12  | 1.16 |
| ELAVL1    | 0.67  | 1.11 |
| ATP6V1E1  | 1.50  | 0.97 |
| HSP90B1   | 2.71  | 1.45 |
| GTF3C3    | 0.41  | 0.87 |
| UROD      | 1.87  | 1.48 |
| STIP1     | 0.85  | 0.75 |
| CBR1      | 1.69  | 8.63 |
| TPT1      | 1.06  | 1.11 |
| XPO1      | 0.95  | 1    |
| CCT8      | 0.98  | 0.69 |
| RPL7A     | 0.42  | 1.07 |
| CSDE1     | 0.59  | 0.9  |
| FARSB     | 0.29  | 0.94 |
| CCT2      | 1.26  | 0.99 |
| CCT3      | 1.00  | 0.67 |
| CCT7      | 3.60  | 0.44 |
| CCT4      | 4.33  | 1.02 |
| CCT5      | 1.82  | 0.88 |
| EFTUD2    | 0.44  | 0.92 |
| PAICS     | 1.03  | 1.43 |
| TTN       | 0.96  | 1.21 |
| GTF2I     | 0.98  | 1.14 |
| LOC727761 | 1.46  | 1.06 |
| GPS1      | 0.63  | 0.94 |
| GDI2      | 1.16  | 1.75 |
| GART      | 0.77  | 0.97 |
| ARPC4     | 0.42  | 1.12 |
| GARS      | 0.88  | 1    |
| PSMD11    | 0.61  | 1    |
| PSMD13    | 0.64  | 0.96 |
| PSMD12    | 1.77  | 2.77 |
| C22orf28  | 0.98  | 0.99 |

|           |      |      |
|-----------|------|------|
| CBS       | 1.47 | 1.46 |
| GFPT1     | 0.41 | 1.23 |
| FLNB      | 2.81 | 2.17 |
| FLNC      | 1.33 | 0.33 |
| EIF4A1    | 0.68 | 1.73 |
| EIF4A3    | 1.07 | 0.97 |
| KRT18     | 0.22 | 0.42 |
| MYH10     | 3.23 | 1.07 |
| RPL24     | 1.01 | 1.04 |
| GANAB     | 0.90 | 0.6  |
| MSH6      | 0.84 | 1.15 |
| SMS       | 0.78 | 1.04 |
| PRKCSH    | 0.46 | 0.82 |
| AKAP12    | 1.96 | 1.15 |
| FH        | 1.02 | 0.6  |
| CDC2      | 1.10 | 0.98 |
| GLS       | 1.57 | 0.79 |
| HINT1     | 5.78 | 1.03 |
| MDN1      | 1.33 | 1    |
| TRIM71    | 0.81 | 1.07 |
| CDC37     | 2.43 | 1    |
| ST13      | 1.72 | 1.35 |
| PSMD5     | 1.01 | 0.94 |
| ACAT2     | 1.02 | 0.78 |
| C1QBP     | 1.14 | 0.92 |
| ENOPH1    | 0.74 | 0.95 |
| COX4I1    | 2.62 | 0.83 |
| CAPZA2    | 0.96 | 0.73 |
| LOC644166 | 0.19 | 0.98 |
| PGLS      | 1.13 | 0.8  |
| TBCA      | 2.06 | 1.4  |
| HSPE1     | 0.07 | 0.93 |
| MARS      | 0.93 | 1.04 |
| ARF4      | 0.04 | 1.01 |
| MDH2      | 2.41 | 0.51 |
| RBM4      | 1.45 | 0.88 |
| MAP4      | 1.69 | 1.29 |

|          |       |      |
|----------|-------|------|
| RPL23A   | 1.33  | 1.53 |
| EEF1A1   | 1.59  | 1.72 |
| HMGB1    | 1.77  | 3.84 |
| PSMD6    | 1.77  | 0.97 |
| PSMD1    | 0.98  | 1    |
| PSMD3    | 2.99  | 0.96 |
| PSMD2    | 1.03  | 0.57 |
| PLCG1    | 0.51  | 0.81 |
| PSMD7    | 1.03  | 0.88 |
| CPSF6    | 0.47  | 0.78 |
| HIST2H4B | 0.89  | 1.52 |
| EIF2S3   | 0.49  | 0.96 |
| CAD      | 0.92  | 0.95 |
| DDX17    | 0.12  | 0.55 |
| PGD      | 3.27  | 2.17 |
| NMT1     | 0.95  | 1.16 |
| PMPCB    | 1.19  | 0.8  |
| AASS     | 14.37 | 2.77 |
| VPS29    | 0.57  | 1.51 |
| NUDC     | 0.70  | 0.64 |
| IMPDH2   | 1.14  | 0.65 |
| PEA15    | 1.23  | 0.55 |
| RBM25    | 1.01  | 0.78 |
| PSMC1    | 0.47  | 0.98 |
| PSMC2    | 1.85  | 0.95 |
| PSMC3    | 0.70  | 0.64 |
| PSMC5    | 0.07  | 0.96 |
| PSMC6    | 0.97  | 1.01 |
| CTSC     | 0.48  | 1.02 |
| BAT1     | 0.11  | 1.07 |
| RTN4     | 2.06  | 1.05 |
| NOLC1    | 1.13  | 0.89 |
| KPNB1    | 0.92  | 1.01 |
| SEPHS1   | 2.24  | 2.08 |
| RTN3     | 1.07  | 0.86 |
| CALR     | 0.91  | 1.69 |
| CALU     | 0.43  | 0.77 |

|           |       |      |
|-----------|-------|------|
| NUP37     | 1.40  | 1.33 |
| ACTR2     | 0.68  | 1    |
| LOC646195 | 1.17  | 1.01 |
| NCL       | 0.62  | 0.59 |
| BZW1      | 0.61  | 1.02 |
| EEF2      | 12.64 | 2.06 |
| CHERP     | 0.39  | 0.76 |
| HUWE1     | 0.85  | 0.91 |
| UFC1      | 0.70  | 0.6  |
| MIF       | 0.05  | 1.49 |
| PRPF8     | 0.75  | 0.85 |
| LRRC47    | 1.05  | 1.09 |
| NUDT21    | 0.27  | 0.77 |
| RPL22     | 1.13  | 1.34 |
| GNL3      | 1.30  | 0.67 |
| PEBP1     | 0.57  | 1.19 |
| EIF3K     | 0.46  | 1.83 |
| EIF3L     | 0.49  | 1.07 |
| HYOU1     | 2.07  | 1.21 |
| RAN       | 0.12  | 0.86 |
| EIF3A     | 0.80  | 1.04 |
| EIF3B     | 0.59  | 0.93 |
| EIF3C     | 1.07  | 1.11 |
| EIF3D     | 1.13  | 1.17 |
| EIF3E     | 0.77  | 0.99 |
| STRAP     | 1.06  | 0.34 |
| RARS      | 0.98  | 1.04 |
| FADD      | 1.14  | 1.09 |
| CRKL      | 0.56  | 1.13 |
| HDGF      | 1.09  | 0.52 |
| LOC401206 | 0.21  | 0.99 |
| DNAJA1    | 0.32  | 0.92 |
| TPR       | 1.03  | 0.94 |
| PHGDH     | 0.06  | 0.66 |
| PAFAH1B3  | 0.28  | 0.93 |
| PAFAH1B2  | 1.56  | 1.75 |
| DBI       | 0.31  | 0.76 |

|           |       |      |
|-----------|-------|------|
| SYNCRIP   | 3.27  | 1.01 |
| CNN3      | 0.90  | 0.92 |
| CNN2      | 1.35  | 1.34 |
| VIM       | 1.13  | 0.6  |
| RCN1      | 0.99  | 0.68 |
| PTPN12    | 2.02  | 1    |
| FKBP3     | 1.28  | 1.39 |
| C14orf166 | 0.68  | 1.05 |
| DDAH1     | 4.23  | 1.58 |
| PAK2      | 1.18  | 1.03 |
| ANXA1     | 11.67 | 2.29 |
| CTPS      | 0.52  | 0.68 |
| PDXK      | 1.19  | 0.9  |
| FUS       | 0.99  | 0.54 |
| COPS2     | 1.12  | 1.17 |
| SPTAN1    | 1.02  | 1.13 |
| FUBP1     | 0.52  | 0.99 |
| KHDRBS1   | 9.84  | 0.32 |
| EIF2A     | 0.62  | 1.07 |
| LAMB1     | 1.38  | 1.39 |
| EXOSC4    | 0.99  | 0.74 |
| RUVBL1    | 5.12  | 1.16 |
| SUB1      | 1.23  | 1.52 |
| ADAR      | 0.69  | 0.84 |
| KHSRP     | 0.19  | 0.74 |
| TKT       | 1.06  | 1.84 |
| SF3A3     | 0.39  | 0.7  |
| L1TD1     | 4.39  | 2.06 |
| WDR3      | 17.79 | 0.92 |
| DPYSL2    | 0.24  | 0.64 |
| DPYSL3    | 0.94  | 1.14 |
| POLR1C    | 1.34  | 0.8  |
| TNPO1     | 1.38  | 0.89 |
| NHP2L1    | 0.15  | 0.91 |
| ABCF2     | 1.08  | 0.98 |
| EIF4E     | 3.59  | 1    |
| TUBB2A    | 1.91  | 1.53 |

|         |      |      |
|---------|------|------|
| TUBB2C  | 0.26 | 0.72 |
| EIF4B   | 1.34 | 0.82 |
| LARS    | 0.67 | 1.02 |
| NASP    | 2.20 | 0.59 |
| MTHFD1  | 1.90 | 2.27 |
| SPARC   | 2.09 | 0.52 |
| TUBB    | 1.01 | 0.7  |
| PFN1    | 1.69 | 1.93 |
| AKR1A1  | 2.01 | 0.96 |
| SSB     | 1.62 | 1.02 |
| TPM4    | 1.38 | 1.25 |
| ADSS    | 1.56 | 1.01 |
| RPLP2   | 3.93 | 1.08 |
| RPLP1   | 0.75 | 1.73 |
| RPLP0   | 1.67 | 1.08 |
| TPM2    | 1.68 | 0.93 |
| FABP5   | 5.55 | 2.91 |
| GCN1L1  | 1.03 | 1.16 |
| PPA1    | 2.96 | 1.2  |
| CBX5    | 0.55 | 0.96 |
| WDHD1   | 0.78 | 1.04 |
| QPRT    | 0.60 | 0.6  |
| SET     | 4.51 | 1.02 |
| SFRS13A | 1.08 | 0.83 |
| ATP5A1  | 1.01 | 1.39 |
| TPM3    | 1.19 | 0.92 |
| SNRPA1  | 0.75 | 0.73 |
| TPM1    | 3.31 | 0.52 |
| HNRNPAB | 1.86 | 1    |
| HNRNPL  | 0.87 | 0.84 |
| SRP72   | 2.17 | 0.96 |
| ETFA    | 0.92 | 0.92 |
| CLIC4   | 2.01 | 0.81 |
| LIN28   | 1.06 | 0.6  |
| CLIC1   | 0.92 | 1.03 |
| CSTB    | 0.16 | 0.88 |
| HNRNPA3 | 4.31 | 0.71 |

|         |      |      |
|---------|------|------|
| HNRNPA0 | 3.22 | 0.88 |
| HNRNPA1 | 8.06 | 0.55 |
| ENO1    | 0.98 | 1.65 |
| ENO2    | 0.55 | 0.3  |
| SND1    | 1.45 | 1.08 |
| IGF2BP1 | 0.99 | 0.69 |
| IGF2BP3 | 0.97 | 0.86 |
| NAT13   | 1.00 | 1.09 |
| API5    | 1.04 | 0.83 |
| TCP1    | 0.34 | 0.95 |
| PPAT    | 0.92 | 0.92 |
| RPL10A  | 1.96 | 1.49 |
| HNRNPF  | 1.05 | 1.22 |
| PRDX6   | 0.43 | 2.17 |
| PRDX5   | 0.62 | 0.98 |
| PRDX4   | 0.18 | 0.99 |
| PRDX3   | 0.45 | 0.65 |
| PRDX2   | 0.48 | 0.41 |
| SF3B3   | 0.81 | 0.85 |
| SF3B2   | 2.86 | 0.94 |
| SRM     | 0.25 | 1.09 |
| RPA3    | 1.64 | 0.75 |
| SF3B5   | 1.04 | 0.79 |
| RBMX    | 0.86 | 0.92 |
| IQGAP1  | 1.74 | 1.62 |
| YWHAZ   | 3.42 | 1.84 |
| DRG1    | 1.01 | 1.02 |
| EIF5B   | 1.02 | 0.84 |
| M6PRBP1 | 1.06 | 0.75 |
| PFKP    | 3.67 | 3.44 |
| HSPD1   | 1.61 | 0.62 |
| YWHAH   | 1.60 | 1.95 |
| YWHAB   | 2.34 | 1.09 |
| EPRS    | 0.80 | 0.9  |
| CCT6A   | 0.77 | 0.75 |
| YWHAG   | 3.14 | 1.02 |
| YWHAE   | 0.96 | 0.95 |



|           |       |      |
|-----------|-------|------|
| COPA      | 0.52  | 0.38 |
| MAT2A     | 0.91  | 1.1  |
| ANXA6     | 2.36  | 1.49 |
| COPE      | 1.22  | 0.55 |
| VCL       | 10.33 | 5.48 |
| WARS      | 1.36  | 2.99 |
| VCP       | 2.07  | 1.37 |
| LOC643576 | 1.00  | 1.75 |
| DYNC1H1   | 1.15  | 2.07 |
| CALD1     | 9.00  | 4.19 |
| DDX21     | 0.83  | 1.13 |
| AHCY      | 0.11  | 1.84 |
| HN1L      | 1.29  | 1.4  |
| NSUN2     | 0.84  | 1.04 |
| GSTP1     | 2.55  | 1.19 |
| PDCD6     | 0.66  | 0.85 |
| ILF3      | 1.00  | 0.67 |
| TARS      | 0.28  | 2.54 |
| TUFM      | 1.09  | 0.54 |
| FKBP10    | 1.19  | 1.03 |
| CKB       | 1.24  | 2.29 |
| RPS4X     | 0.30  | 0.97 |
| TPI1      | 0.49  | 0.29 |
| TXNDC5    | 1.57  | 1.01 |
| SNRNP200  | 0.40  | 0.52 |
| SUGT1     | 0.95  | 0.81 |
| CALM1     | 7.15  | 1.03 |
| UBE2I     | 0.87  | 0.92 |
| PARK7     | 1.09  | 1.85 |
| DNMT1     | 0.59  | 1.13 |
| MARCKS    | 1.36  | 0.16 |
| HNRNPUL1  | 1.11  | 1.31 |
| GLRX5     | 1.15  | 0.66 |
| GLO1      | 2.03  | 1.28 |
| TAGLN2    | 0.99  | 0.66 |
| MAPRE1    | 0.72  | 1.21 |
| LUC7L2    | 0.47  | 0.66 |

|           |       |      |
|-----------|-------|------|
| IARS      | 1.16  | 1    |
| TRIM28    | 2.24  | 2.98 |
| GPI       | 1.03  | 1.21 |
| IDH2      | 0.17  | 0.33 |
| IDH1      | 1.55  | 1.37 |
| PRMT1     | 1.03  | 1.05 |
| PRMT5     | 1.35  | 1.11 |
| RPL10     | 2.10  | 1.76 |
| RPL11     | 4.38  | 1.28 |
| RPL13     | 0.28  | 1.36 |
| RPL18     | 0.90  | 1.15 |
| SHMT2     | 1.01  | 0.89 |
| GMPS      | 0.36  | 0.46 |
| DNAJA2    | 0.53  | 1.09 |
| GOT1      | 1.76  | 1.21 |
| ATIC      | 1.02  | 0.79 |
| SNRPD1    | 1.16  | 0.82 |
| FUBP3     | 0.88  | 1.03 |
| PTPN11    | 0.31  | 0.99 |
| RBBP7     | 3.55  | 0.45 |
| ARCN1     | 1.35  | 0.87 |
| OXSRI     | 0.60  | 0.77 |
| KPNA4     | 2.57  | 0.97 |
| KPNA2     | 2.68  | 1.34 |
| COPB1     | 1.04  | 0.79 |
| COPB2     | 0.56  | 0.81 |
| LOC652826 | 0.84  | 1.05 |
| ENAH      | 0.12  | 0.73 |
| GAPDH     | 0.31  | 0.48 |
| SMU1      | 0.41  | 0.47 |
| MATR3     | 2.03  | 0.63 |
| XRCC5     | 1.01  | 0.98 |
| XRCC6     | 1.01  | 0.99 |
| LOC645619 | 1.11  | 1.55 |
| HSPH1     | 1.00  | 0.56 |
| ABCF1     | 26.92 | 0.96 |
| NONO      | 0.34  | 1    |

|          |       |      |
|----------|-------|------|
| AHNAK    | 1.06  | 0.51 |
| BASP1    | 10.28 | 2.3  |
| NARS     | 0.88  | 1.71 |
| YARS     | 0.62  | 0.92 |
| LSM3     | 0.82  | 0.94 |
| UGP2     | 5.37  | 2.65 |
| RPS3A    | 0.23  | 1.02 |
| PGK1     | 0.54  | 0.57 |
| UMPS     | 0.83  | 0.9  |
| EIF3I    | 0.32  | 0.8  |
| ERP29    | 1.03  | 0.98 |
| MTAP     | 1.25  | 1.16 |
| PARP1    | 0.35  | 0.96 |
| ENY2     | 1.85  | 1.11 |
| TUBB3    | 0.80  | 0.64 |
| SFPQ     | 1.15  | 0.96 |
| RSL1D1   | 0.55  | 0.68 |
| UBA3     | 0.38  | 0.96 |
| UBA1     | 0.93  | 0.7  |
| SH3BGRL3 | 0.98  | 0.52 |
| UBE2N    | 1.01  | 0.94 |
| SLC3A2   | 3.19  | 1.65 |
| UBE2C    | 1.54  | 0.85 |
| BCCIP    | 1.92  | 1.08 |
| PRPF19   | 2.01  | 0.78 |
| AGFG1    | 1.10  | 1.24 |
| ASNA1    | 0.68  | 0.93 |
| ACTC1    | 33.11 | 9.51 |
| RPL18A   | 0.36  | 1.9  |
| RPS15A   | 0.65  | 1.36 |
| RPS7     | 2.52  | 1.39 |
| RPS6     | 2.89  | 1.09 |
| RPS5     | 3.75  | 0.95 |
| RPS3     | 0.30  | 1.11 |
| RPS2     | 0.99  | 1.04 |
| KRT8     | 0.12  | 0.42 |
| BCAS2    | 0.88  | 0.84 |

|          |      |      |
|----------|------|------|
| RPS9     | 0.05 | 1.21 |
| RPS8     | 0.88 | 1.02 |
| GNB2L1   | 0.23 | 2.01 |
| RBM8A    | 0.24 | 0.58 |
| TALDO1   | 1.18 | 1.91 |
| GMFB     | 2.52 | 1.39 |
| PSMA3    | 0.28 | 0.99 |
| PSMA1    | 0.76 | 1.12 |
| PSMA6    | 0.07 | 1.24 |
| PSMA5    | 1.03 | 1.09 |
| MSH2     | 0.94 | 1.62 |
| MARCKSL1 | 1.13 | 0.12 |
| RPS27    | 4.27 | 1.13 |
| RPS24    | 1.06 | 1.01 |
| RPS23    | 0.60 | 1.09 |
| RPS20    | 2.25 | 0.99 |
| RPS21    | 0.44 | 1.4  |
| SF3B1    | 1.72 | 0.59 |
| CARHSP1  | 5.73 | 1.13 |
| WBP11    | 1.03 | 1.46 |
| USP5     | 0.83 | 0.82 |
| GSTO1    | 0.63 | 0.89 |
| PRDX1    | 2.33 | 0.64 |
| AKR1B1   | 0.52 | 0.62 |
| USP7     | 1.96 | 1.05 |
| UCHL1    | 2.78 | 2.67 |
| FSCN1    | 0.21 | 1.54 |
| ASNS     | 0.77 | 2.46 |
| WDR12    | 2.21 | 0.75 |
| PPIB     | 0.31 | 1.02 |
| EIF2S2   | 0.51 | 1.02 |
| PPP2R1A  | 3.73 | 0.99 |
| VARS     | 1.81 | 0.92 |
| MAGOHB   | 1.47 | 0.25 |
| AIMP2    | 0.23 | 0.96 |
| DDX19A   | 1.51 | 0.91 |
| CYCS     | 0.90 | 1    |

|           |      |      |
|-----------|------|------|
| AIMP1     | 1.11 | 1.01 |
| CORO1B    | 0.78 | 1.4  |
| MDH1      | 0.87 | 1.33 |
| LTA4H     | 0.70 | 1.27 |
| NAP1L1    | 1.17 | 0.59 |
| RPL27     | 0.23 | 1.49 |
| RPL26     | 1.03 | 1    |
| TLN1      | 2.20 | 0.81 |
| APEX1     | 1.01 | 2    |
| CCBL2     | 0.81 | 0.67 |
| HNRNPA2B1 | 1.14 | 0.46 |
| HMGCS1    | 1.24 | 1.04 |
| ZYX       | 5.07 | 1.06 |
| DPP3      | 3.41 | 1.24 |
| PCNA      | 0.22 | 0.81 |
| ANXA2     | 0.96 | 0.59 |
| ANXA5     | 3.29 | 1.99 |
| HSPB1     | 0.08 | 0.13 |
| MYBBP1A   | 0.55 | 1.21 |
| MCM7      | 0.61 | 0.74 |
| MCM6      | 0.40 | 0.75 |
| MCM5      | 1.08 | 0.94 |
| MCM4      | 0.98 | 0.98 |
| MCM3      | 0.85 | 0.98 |
| MCM2      | 0.74 | 1.01 |
| FLNA      | 4.81 | 3.6  |
| ALDOA     | 0.41 | 1.07 |
| TAGLN     | 2.52 | 3.61 |
| PSAT1     | 0.53 | 1.25 |
| SFRS7     | 0.38 | 0.73 |
| KRT19     | 0.88 | 1.85 |
| EIF4A2    | 0.31 | 0.36 |
| ILF2      | 0.82 | 0.57 |
| YWHAQ     | 6.93 | 0.55 |
| LRPPRC    | 0.51 | 0.92 |
| DARS      | 0.80 | 0.96 |
| NME1-NME2 | 0.10 | 1.76 |

|             |      |      |
|-------------|------|------|
| OAT         | 0.34 | 1.4  |
| DHX15       | 0.49 | 0.86 |
| HIBADH      | 0.98 | 0.78 |
| S100A10     | 2.23 | 1.24 |
| S100A13     | 1.08 | 0.53 |
| RPL22L1     | 0.72 | 0.76 |
| XPOT        | 0.24 | 0.82 |
| DDX39       | 0.87 | 0.96 |
| PFKM        | 1.38 | 0.53 |
| HSP90AB1    | 3.22 | 1.78 |
| CRABP2      | 0.29 | 0.2  |
| GOT2        | 1.25 | 1.13 |
| LOC654188   | 0.32 | 0.83 |
| PTBP1       | 0.88 | 1.01 |
| THOC4       | 0.59 | 0.55 |
| PFAS        | 2.94 | 2.25 |
| NME1        | 1.66 | 0.9  |
| DDX3X       | 1.27 | 0.98 |
| C20orf27    | 1.06 | 1.04 |
| P4HB        | 3.90 | 2.51 |
| HK1         | 0.56 | 1.02 |
| NAE1        | 1.12 | 0.91 |
| SERPINB9    | 1.60 | 5.18 |
| PELP1       | 1.87 | 1    |
| PA2G4       | 0.21 | 0.96 |
| CSNK2A1     | 3.65 | 0.51 |
| FDPS        | 0.68 | 0.45 |
| H2AFV       | 0.95 | 0.8  |
| PTMA        | 3.18 | 0.92 |
| PPP2CA      | 1.46 | 1.01 |
| EEF1G       | 0.31 | 2.15 |
| EIF4G1      | 0.41 | 0.97 |
| H2AFX       | 2.52 | 0.93 |
| DDX5        | 0.91 | 0.85 |
| DDX6        | 5.68 | 1.08 |
| TMEM189-UBE | 0.85 | 0.88 |
| DDX1        | 2.68 | 1.15 |

|          |      |      |
|----------|------|------|
| EIF4G2   | 0.12 | 1.05 |
| EEF1D    | 1.06 | 2.37 |
| PRKCI    | 1.26 | 1.21 |
| STMN1    | 1.05 | 0.51 |
| RPL8     | 2.52 | 1.3  |
| RPL9     | 0.45 | 1.12 |
| RPL6     | 0.94 | 1.38 |
| PABPC1   | 0.21 | 1.03 |
| RPL4     | 0.30 | 1.25 |
| RPL5     | 1.66 | 1.03 |
| PCMT1    | 0.11 | 1.09 |
| RPL3     | 1.44 | 1.27 |
| FEN1     | 1.02 | 0.75 |
| UBE2L3   | 1.17 | 1.18 |
| CLTC     | 0.46 | 0.7  |
| LSM8     | 3.08 | 0.86 |
| CSDA     | 2.50 | 0.85 |
| CDV3     | 1.09 | 1.13 |
| TUBA1B   | 0.21 | 0.92 |
| CAP1     | 2.00 | 0.9  |
| PCBP2    | 0.92 | 0.97 |
| PPP1R12A | 1.04 | 0.87 |
| PCBP1    | 0.57 | 1.46 |
| NPEPPS   | 0.87 | 1    |
| NACA     | 0.61 | 1.45 |
| CAB39    | 0.37 | 0.96 |
| KIAA0368 | 0.34 | 1.52 |
| ARPC2    | 1.00 | 1.32 |
| PGM1     | 1.24 | 0.5  |
| PSME3    | 0.72 | 0.98 |
| DAG1     | 1.69 | 1.46 |
| RHOA     | 0.28 | 1    |
| HADH     | 1.55 | 0.88 |
| STAT1    | 1.23 | 0.97 |
| CARS     | 0.75 | 2.6  |
| PAK1     | 2.24 | 1.07 |
| OLA1     | 1.08 | 0.96 |

|           |      |      |
|-----------|------|------|
| BAT3      | 1.02 | 0.79 |
| IPO9      | 1.41 | 0.7  |
| IPO7      | 3.99 | 0.62 |
| IPO5      | 1.79 | 1.33 |
| CSNK2B    | 1.27 | 1.09 |
| PKM2      | 1.89 | 0.72 |
| RAD23B    | 1.03 | 0.99 |
| USP14     | 0.82 | 1.17 |
| SNX2      | 0.23 | 0.92 |
| SNRPB     | 0.30 | 0.74 |
| HNRNPH1   | 0.30 | 0.62 |
| DIABLO    | 0.98 | 0.7  |
| HNRNPH3   | 0.10 | 0.76 |
| NES       | 4.62 | 0.97 |
| TNPO3     | 0.96 | 0.71 |
| RBM12     | 0.27 | 0.92 |
| SNRPF     | 0.39 | 0.89 |
| HNRNPR    | 0.44 | 0.84 |
| HNRNPU    | 1.02 | 0.57 |
| HSP90AA1  | 0.30 | 0.89 |
| HNRNPK    | 0.39 | 0.74 |
| FASN      | 0.66 | 0.72 |
| HNRNPM    | 0.81 | 0.91 |
| RPL7      | 1.11 | 1.83 |
| NP        | 1.00 | 1.53 |
| HNRNPC    | 0.34 | 0.59 |
| HNRNPD    | 0.36 | 0.72 |
| BOLA2B    | 1.37 | 1.02 |
| HELLS     | 0.35 | 1.1  |
| HDLBP     | 1.38 | 1.04 |
| LOC441246 | 0.87 | 1.06 |
| RCC2      | 3.28 | 2.29 |
| ERP44     | 0.72 | 1.04 |
| USO1      | 0.74 | 1.28 |
| DDB1      | 0.30 | 0.59 |
| ADH5      | 2.54 | 1.43 |
| PSPH      | 0.92 | 1.05 |



|           |      |      |
|-----------|------|------|
| OTUB1     | 0.58 | 1.08 |
| CARM1     | 4.51 | 0.95 |
| PSMB7     | 1.69 | 1.01 |
| CSE1L     | 0.34 | 1.02 |
| PSMB5     | 1.35 | 1.14 |
| PSMB2     | 0.18 | 1.18 |
| PSMB1     | 2.55 | 1.04 |
| FBL       | 0.93 | 0.46 |
| RPS13     | 2.28 | 1.05 |
| KARS      | 1.13 | 1.05 |
| RPS11     | 0.88 | 1.26 |
| RPS10     | 5.68 | 0.98 |
| RPS17     | 0.89 | 1.07 |
| RPS16     | 0.90 | 1.03 |
| RPS14     | 0.51 | 1.02 |
| SSRP1     | 0.10 | 1.91 |
| RPS19     | 1.03 | 1.02 |
| RPS18     | 1.00 | 0.96 |
| MSN       | 0.49 | 0.77 |
| HSPA1A    | 0.31 | 2.35 |
| RPL30     | 1.63 | 1.09 |
| CACYBP    | 0.56 | 0.47 |
| U2AF2     | 1.03 | 0.9  |
| LOC653888 | 0.79 | 1.02 |
| TXN       | 3.88 | 1.73 |
| MACF1     | 6.29 | 1.11 |
| CRABP1    | 1.48 | 0.95 |
| CAND1     | 1.06 | 0.71 |
| PRPS1     | 0.27 | 0.34 |
| SFRS3     | 0.74 | 1.06 |
| SFRS1     | 1.63 | 0.59 |
| C21orf33  | 1.03 | 0.8  |
| APOA1BP   | 1.10 | 0.71 |
| LDHA      | 3.96 | 7.59 |
| LDHB      | 0.17 | 0.15 |
| PLS3      | 1.00 | 1.57 |
| PDIA6     | 2.35 | 0.97 |

|           |      |      |
|-----------|------|------|
| PDIA4     | 0.99 | 0.56 |
| PDIA3     | 2.41 | 1.52 |
| CFL1      | 2.20 | 0.63 |
| LOC143244 | 0.19 | 1.25 |
| NPM1      | 8.88 | 0.7  |
| DAZAP1    | 0.97 | 0.72 |
| ACTN1     | 4.23 | 2.13 |
| RPL38     | 0.99 | 0.86 |
| ACTN4     | 7.03 | 1.9  |
| AARS      | 2.37 | 1.49 |
| PDCD6IP   | 0.73 | 0.95 |
| EZR       | 1.11 | 4.21 |
| RPL31     | 0.98 | 1.14 |
| G3BP1     | 0.71 | 1.25 |
| SFRS11    | 0.18 | 0.69 |
| G3BP2     | 0.94 | 1.17 |
| DNM1L     | 1.01 | 0.59 |
| SERPINH1  | 1.60 | 0.99 |
| ALDH9A1   | 1.23 | 0.88 |

| Gene Symbol | Whole Cell<br>iTRAQ Ratio<br>ESC/ECC | Non-cytosolic<br>iTRAQ Ratio<br>ESC/ECC |
|-------------|--------------------------------------|-----------------------------------------|
| UTF1        | 15.36                                | 11.91                                   |
| ACTC1       | 33.11                                | 10.84                                   |
| COL11A1     | 4.25                                 | 6.58                                    |
| AASS        | 14.37                                | 5.65                                    |
| DNMT3B      | 3.39                                 | 5.55                                    |
| TRIM28      | 2.24                                 | 3.87                                    |
| EZR         | 1.11                                 | 3.75                                    |
| SLC3A2      | 3.19                                 | 3.54                                    |
| COPA        | 0.52                                 | 3.46                                    |
| L1TD1       | 4.39                                 | 3.38                                    |
| NMT1        | 0.95                                 | 3.24                                    |
| AKAP12      | 1.96                                 | 3.11                                    |
| SLC2A1      | 3.80                                 | 2.91                                    |
| COPB1       | 1.04                                 | 2.74                                    |
| LAMB1       | 1.38                                 | 2.61                                    |
| GJA1        | 2.87                                 | 2.41                                    |
| SRP72       | 2.17                                 | 2.38                                    |
| COPB2       | 0.56                                 | 2.35                                    |
| MYH10       | 3.23                                 | 2.31                                    |
| UGP2        | 5.37                                 | 2.21                                    |
| FUBP1       | 0.52                                 | 2.16                                    |
| RCC2        | 3.28                                 | 2.16                                    |
| HNRPDL      | 0.76                                 | 2.11                                    |
| CPSF6       | 0.47                                 | 2.11                                    |
| PTBP1       | 0.88                                 | 2.06                                    |
| KRT19       | 0.88                                 | 2.06                                    |
| IDH1        | 1.55                                 | 2.05                                    |
| SR140       | 3.22                                 | 2.03                                    |
| RPS3        | 0.30                                 | 2.00                                    |
| RPL38       | 0.99                                 | 1.95                                    |
| CANX        | 3.86                                 | 1.95                                    |
| LOC645619   | 1.11                                 | 1.93                                    |
| RPS15A      | 0.65                                 | 1.92                                    |
| OAT         | 0.34                                 | 1.92                                    |

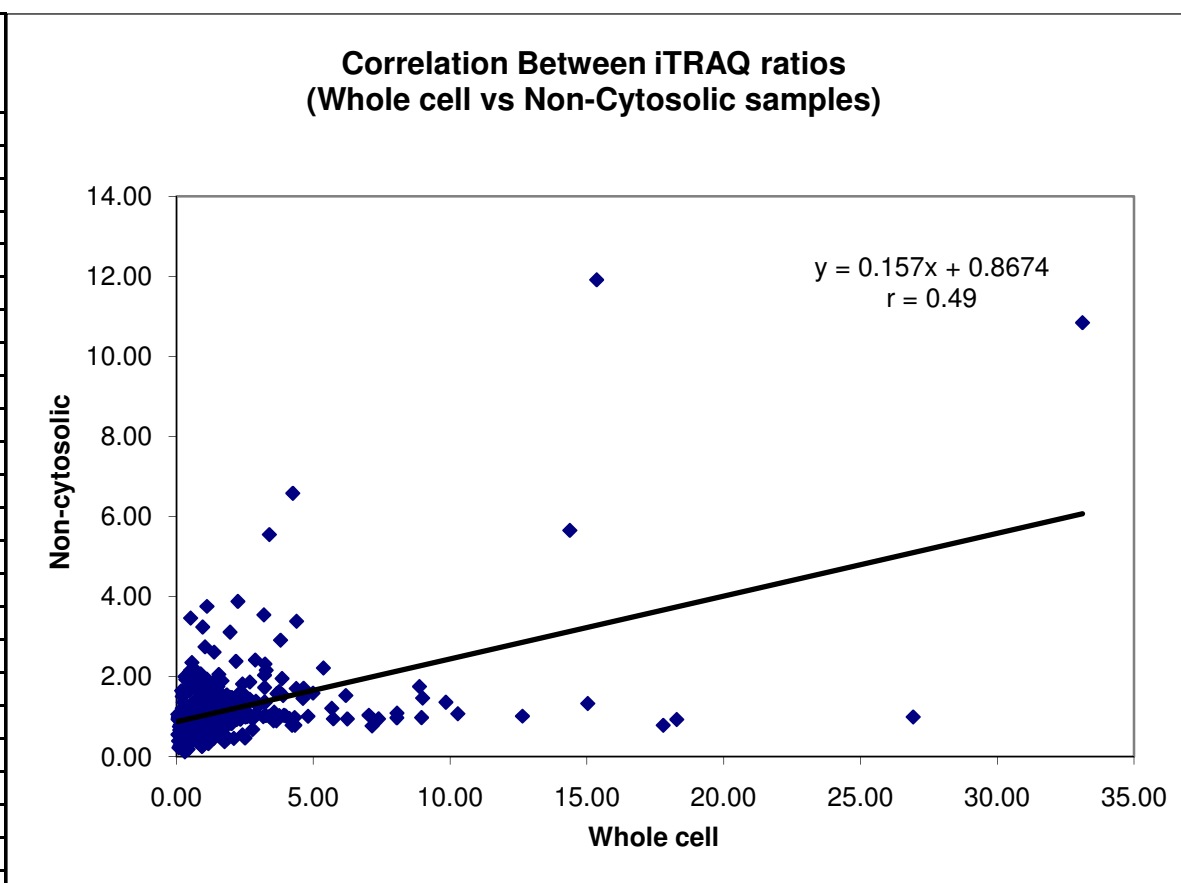

|          |      |      |
|----------|------|------|
| HNRNPM   | 0.81 | 1.90 |
| RPL5     | 1.66 | 1.89 |
| KPNA2    | 2.68 | 1.86 |
| NCKAP1   | 0.59 | 1.86 |
| HK1      | 0.56 | 1.86 |
| MDN1     | 1.33 | 1.85 |
| BAT3     | 1.02 | 1.84 |
| FKBP3    | 1.28 | 1.82 |
| PDIA3    | 2.41 | 1.81 |
| RBMX     | 0.86 | 1.80 |
| LMAN2    | 1.27 | 1.80 |
| LASP1    | 1.52 | 1.75 |
| NPM1     | 8.88 | 1.75 |
| LRRC47   | 1.05 | 1.74 |
| HSP90AB1 | 3.22 | 1.72 |
| EEF1D    | 1.06 | 1.71 |
| TJP1     | 4.64 | 1.71 |
| EIF4A1   | 0.68 | 1.71 |
| RPL11    | 4.38 | 1.70 |
| G3BP1    | 0.71 | 1.69 |
| DDX3X    | 1.27 | 1.67 |
| TMED10   | 0.18 | 1.65 |
| RPL9     | 0.45 | 1.64 |
| RPS5     | 3.75 | 1.62 |
| COPG     | 0.95 | 1.60 |
| EEF1A1   | 1.59 | 1.59 |
| HMGA1    | 4.99 | 1.59 |
| CTNND1   | 1.01 | 1.59 |
| PFKP     | 3.67 | 1.57 |
| RPS20    | 2.25 | 1.55 |
| RPS16    | 0.90 | 1.54 |
| HSPA5    | 2.38 | 1.54 |
| BANF1    | 1.83 | 1.53 |
| ENY2     | 1.85 | 1.53 |
| COPE     | 1.22 | 1.53 |
| SLC7A5   | 6.18 | 1.53 |
| P4HB     | 3.90 | 1.52 |

|           |       |      |
|-----------|-------|------|
| RPS7      | 2.52  | 1.51 |
| HMGB3     | 1.70  | 1.51 |
| PABPC1    | 0.21  | 1.50 |
| RPS13     | 2.28  | 1.49 |
| HSPA9     | 2.34  | 1.49 |
| RPL10A    | 1.96  | 1.48 |
| MATR3     | 2.03  | 1.47 |
| CALD1     | 9.00  | 1.46 |
| SFPQ      | 1.15  | 1.46 |
| XRCC6     | 1.01  | 1.46 |
| NES       | 4.62  | 1.45 |
| DDX1      | 2.68  | 1.43 |
| HYOU1     | 2.07  | 1.41 |
| ADSS      | 1.56  | 1.40 |
| RTN4      | 2.06  | 1.39 |
| CD151     | 1.11  | 1.39 |
| RRBP1     | 2.90  | 1.38 |
| RPS2      | 0.99  | 1.37 |
| HNRNPA0   | 3.22  | 1.36 |
| MCM7      | 0.61  | 1.36 |
| RPL7      | 1.11  | 1.36 |
| PDHA1     | 0.24  | 1.36 |
| KHDRBS1   | 9.84  | 1.36 |
| CAPZA1    | 3.24  | 1.35 |
| HNRNPUL1  | 1.11  | 1.34 |
| RPS8      | 0.88  | 1.34 |
| WARS      | 1.36  | 1.34 |
| CD9       | 0.64  | 1.34 |
| GOT2      | 1.25  | 1.33 |
| LOC645441 | 15.03 | 1.33 |
| PLEC1     | 1.93  | 1.32 |
| MKI67     | 0.79  | 1.32 |
| RPL24     | 1.01  | 1.32 |
| DARS      | 0.80  | 1.32 |
| PSMD2     | 1.03  | 1.30 |
| TMPO      | 1.36  | 1.30 |
| PSMB1     | 2.55  | 1.29 |

|           |      |      |
|-----------|------|------|
| HDLBP     | 1.38 | 1.28 |
| GOLT1B    | 0.54 | 1.27 |
| CRKL      | 0.56 | 1.27 |
| PSMD3     | 2.99 | 1.27 |
| S100A10   | 2.23 | 1.26 |
| HUWE1     | 0.85 | 1.25 |
| KIAA0368  | 0.34 | 1.25 |
| RPS18     | 1.00 | 1.25 |
| NUP214    | 1.07 | 1.24 |
| HNRNPF    | 1.05 | 1.24 |
| EPRS      | 0.80 | 1.24 |
| MSH2      | 0.94 | 1.24 |
| MAT2A     | 0.91 | 1.24 |
| RPL6      | 0.94 | 1.23 |
| DYNC1H1   | 1.15 | 1.23 |
| RPL3      | 1.44 | 1.23 |
| MARS      | 0.93 | 1.22 |
| RPS10     | 5.68 | 1.20 |
| LOC401206 | 0.21 | 1.20 |
| AP2A1     | 1.54 | 1.19 |
| ZNF207    | 1.19 | 1.19 |
| MAP4      | 1.69 | 1.19 |
| PSMD6     | 1.77 | 1.19 |
| RPLP1     | 0.75 | 1.19 |
| RPL18     | 0.90 | 1.19 |
| CNOT1     | 0.97 | 1.18 |
| NACA      | 0.61 | 1.17 |
| IQGAP1    | 1.74 | 1.17 |
| C14orf166 | 0.68 | 1.17 |
| XRCC5     | 1.01 | 1.16 |
| RPS14     | 0.51 | 1.16 |
| EIF3B     | 0.59 | 1.15 |
| LMNB1     | 0.82 | 1.15 |
| PSMB5     | 1.35 | 1.15 |
| PNN       | 1.03 | 1.15 |
| TUFM      | 1.09 | 1.15 |
| NOLC1     | 1.13 | 1.14 |

|           |      |      |
|-----------|------|------|
| GFPT1     | 0.41 | 1.14 |
| RPL28     | 0.67 | 1.13 |
| CYC1      | 0.67 | 1.13 |
| RAVER1    | 2.56 | 1.13 |
| RPL31     | 0.98 | 1.13 |
| PRDX6     | 0.43 | 1.12 |
| ACLY      | 1.76 | 1.12 |
| FKBP10    | 1.19 | 1.12 |
| TARS      | 0.28 | 1.12 |
| PSMC1     | 0.47 | 1.11 |
| TEX10     | 1.18 | 1.11 |
| TUBA1C    | 0.14 | 1.11 |
| CYB5A     | 1.15 | 1.11 |
| KPNB1     | 0.92 | 1.11 |
| HELLS     | 0.35 | 1.11 |
| ADD1      | 3.57 | 1.11 |
| LOC441246 | 0.87 | 1.10 |
| PACSIN3   | 1.02 | 1.10 |
| GCN1L1    | 1.03 | 1.10 |
| ATP5B     | 1.13 | 1.10 |
| SCAMP2    | 1.09 | 1.10 |
| THY1      | 0.54 | 1.10 |
| PSMD13    | 0.64 | 1.09 |
| RPL23A    | 1.33 | 1.09 |
| EIF3I     | 0.32 | 1.09 |
| C22orf28  | 0.98 | 1.09 |
| RPS17     | 0.89 | 1.09 |
| EIF2S3    | 0.49 | 1.09 |
| HNRNPA1   | 8.06 | 1.09 |
| UMPS      | 0.83 | 1.08 |
| CCT6A     | 0.77 | 1.08 |
| SND1      | 1.45 | 1.08 |
| CDC2      | 1.10 | 1.08 |
| RPL30     | 1.63 | 1.08 |
| ABCF2     | 1.08 | 1.07 |
| SERPINH1  | 1.60 | 1.07 |
| PRMT1     | 1.03 | 1.07 |

|           |       |      |
|-----------|-------|------|
| BASP1     | 10.28 | 1.07 |
| NCL       | 0.62  | 1.07 |
| DNMT3A    | 0.81  | 1.07 |
| ATP6V1A   | 1.12  | 1.06 |
| HSPA1A    | 0.31  | 1.06 |
| RPS11     | 0.88  | 1.06 |
| PDIA6     | 2.35  | 1.06 |
| IARS      | 1.16  | 1.06 |
| NME1-NME2 | 0.10  | 1.06 |
| RPL21     | 2.91  | 1.06 |
| ALDH18A1  | 1.10  | 1.06 |
| RPS4X     | 0.30  | 1.06 |
| TOP1      | 0.86  | 1.05 |
| DDX21     | 0.83  | 1.05 |
| RBM4      | 1.45  | 1.05 |
| LOC644166 | 0.19  | 1.05 |
| EIF4G1    | 0.41  | 1.05 |
| RPS9      | 0.05  | 1.05 |
| HNRNPAB   | 1.86  | 1.05 |
| RPS19     | 1.03  | 1.05 |
| RPS6      | 2.89  | 1.05 |
| APEX1     | 1.01  | 1.05 |
| TOP2A     | 1.08  | 1.05 |
| IGF2BP3   | 0.97  | 1.05 |
| PSMD11    | 0.61  | 1.04 |
| CAD       | 0.92  | 1.04 |
| UQCRC1    | 1.35  | 1.04 |
| NUP160    | 0.74  | 1.04 |
| TTN       | 0.96  | 1.04 |
| NUDC      | 0.70  | 1.04 |
| TXNDC5    | 1.57  | 1.04 |
| RPL7A     | 0.42  | 1.04 |
| EFTUD2    | 0.44  | 1.04 |
| LOC652826 | 0.84  | 1.04 |
| PSMC3     | 0.70  | 1.04 |
| SMU1      | 0.41  | 1.04 |
| EIF3E     | 0.77  | 1.03 |



|         |      |      |
|---------|------|------|
| TRIM71  | 0.81 | 1.03 |
| DDX5    | 0.91 | 1.03 |
| ACTN4   | 7.03 | 1.03 |
| RPL19   | 0.97 | 1.03 |
| KHSRP   | 0.19 | 1.03 |
| LARS    | 0.67 | 1.03 |
| GDI2    | 1.16 | 1.03 |
| AP2B1   | 1.17 | 1.03 |
| RPLP2   | 3.93 | 1.03 |
| RBPMS   | 1.85 | 1.03 |
| CCT7    | 3.60 | 1.03 |
| VIM     | 1.13 | 1.03 |
| VAPA    | 1.95 | 1.03 |
| SYNCRIP | 3.27 | 1.02 |
| VCP     | 2.07 | 1.02 |
| LRRC59  | 0.52 | 1.02 |
| CHERP   | 0.39 | 1.02 |
| ARPC4   | 0.42 | 1.02 |
| SF3B2   | 2.86 | 1.02 |
| SNRPD1  | 1.16 | 1.02 |
| HNRNPK  | 0.39 | 1.02 |
| KARS    | 1.13 | 1.02 |
| MAP1S   | 3.76 | 1.02 |
| COX2    | 0.24 | 1.02 |
| PSMC2   | 1.85 | 1.02 |
| MPZL1   | 0.82 | 1.02 |
| TMED9   | 0.72 | 1.02 |
| RPL27   | 0.23 | 1.02 |
| COX4I1  | 2.62 | 1.01 |
| SF3B1   | 1.72 | 1.01 |
| C1QBP   | 1.14 | 1.01 |
| PELP1   | 1.87 | 1.01 |
| HNRNPU  | 1.02 | 1.01 |
| IPO7    | 3.99 | 1.01 |
| XPO1    | 0.95 | 1.01 |
| TKT     | 1.06 | 1.01 |
| MAGOHB  | 1.47 | 1.01 |

|           |       |      |
|-----------|-------|------|
| EEF2      | 12.64 | 1.01 |
| PRPF8     | 0.75  | 1.01 |
| MCM3      | 0.85  | 1.01 |
| CALR      | 0.91  | 1.01 |
| CLTC      | 0.46  | 1.01 |
| ARCN1     | 1.35  | 1.00 |
| HSPA8     | 3.39  | 1.00 |
| BAT1      | 0.11  | 1.00 |
| PSMA1     | 0.76  | 1.00 |
| TLN1      | 2.20  | 1.00 |
| FLNA      | 4.81  | 1.00 |
| RPLP0     | 1.67  | 1.00 |
| CKAP5     | 0.96  | 1.00 |
| HNRNPC    | 0.34  | 1.00 |
| TUBB      | 1.01  | 1.00 |
| EIF2A     | 0.62  | 1.00 |
| KPNA4     | 2.57  | 1.00 |
| RPL18A    | 0.36  | 1.00 |
| FASN      | 0.66  | 1.00 |
| PRDX3     | 0.45  | 1.00 |
| RPS24     | 1.06  | 1.00 |
| BCAP31    | 0.44  | 1.00 |
| TPT1      | 1.06  | 1.00 |
| U2AF2     | 1.03  | 1.00 |
| LOC643752 | 3.17  | 1.00 |
| ATP5A1    | 1.01  | 1.00 |
| HDAC2     | 1.09  | 0.99 |
| CSE1L     | 0.34  | 0.99 |
| C21orf70  | 1.51  | 0.99 |
| SFRS13A   | 1.08  | 0.99 |
| CS        | 0.92  | 0.99 |
| RPL8      | 2.52  | 0.99 |
| PMPCB     | 1.19  | 0.99 |
| YWHAE     | 0.96  | 0.99 |
| RPS3A     | 0.23  | 0.99 |
| DAZAP1    | 0.97  | 0.99 |
| TMEM33    | 0.26  | 0.99 |

|          |       |      |
|----------|-------|------|
| SEC63    | 1.34  | 0.99 |
| ABCF1    | 26.92 | 0.99 |
| PPP2R1A  | 3.73  | 0.99 |
| NUDT21   | 0.27  | 0.99 |
| KTN1     | 0.95  | 0.99 |
| RPS23    | 0.60  | 0.99 |
| HNRNPH3  | 0.10  | 0.99 |
| HSP90B1  | 2.71  | 0.99 |
| PSMC5    | 0.07  | 0.99 |
| RPL4     | 0.30  | 0.99 |
| RPL32    | 0.11  | 0.98 |
| TNPO3    | 0.96  | 0.98 |
| IMPDH2   | 1.14  | 0.98 |
| PHB2     | 0.95  | 0.98 |
| MCM6     | 0.40  | 0.98 |
| METAP2   | 0.43  | 0.98 |
| HNRNPA3  | 4.31  | 0.98 |
| TCP1     | 0.34  | 0.98 |
| ATP5F1   | 0.35  | 0.98 |
| BSG      | 0.83  | 0.98 |
| HNRNPL   | 0.87  | 0.98 |
| DBN1     | 8.96  | 0.97 |
| PKM2     | 1.89  | 0.97 |
| ATP6V1B2 | 1.33  | 0.97 |
| PA2G4    | 0.21  | 0.97 |
| ATP1A1   | 0.87  | 0.97 |
| SERBP1   | 8.05  | 0.97 |
| SF3B3    | 0.81  | 0.97 |
| HNRNPR   | 0.44  | 0.96 |
| CYB5B    | 1.55  | 0.96 |
| SF3B5    | 1.04  | 0.96 |
| HADHA    | 1.20  | 0.96 |
| ARPC2    | 1.00  | 0.96 |
| HNRNPD   | 0.36  | 0.96 |
| SMARCA5  | 0.06  | 0.96 |
| IMMT     | 1.01  | 0.96 |
| FLOT2    | 1.13  | 0.96 |

|           |      |      |
|-----------|------|------|
| ERP29     | 1.03 | 0.96 |
| NDUFB10   | 0.47 | 0.96 |
| DPPA4     | 1.80 | 0.96 |
| FLNB      | 2.81 | 0.96 |
| DNAJC10   | 0.86 | 0.96 |
| EIF4G2    | 0.12 | 0.96 |
| LOC649821 | 0.22 | 0.96 |
| GPS1      | 0.63 | 0.95 |
| RAC1      | 1.03 | 0.95 |
| TOP2B     | 4.12 | 0.95 |
| LUC7L2    | 0.47 | 0.95 |
| HSD17B4   | 0.70 | 0.95 |
| ETFA      | 0.92 | 0.95 |
| SHMT2     | 1.01 | 0.95 |
| FAM162A   | 1.69 | 0.95 |
| HSP90AA1  | 0.30 | 0.95 |
| NUP155    | 1.52 | 0.95 |
| THRAP3    | 0.77 | 0.95 |
| FLOT1     | 1.81 | 0.95 |
| LOC143244 | 0.19 | 0.95 |
| EIF4A3    | 1.07 | 0.95 |
| NOP56     | 1.02 | 0.95 |
| GLUD1     | 1.14 | 0.95 |
| ACACA     | 7.39 | 0.94 |
| RRP1B     | 1.27 | 0.94 |
| MAP1B     | 0.98 | 0.94 |
| CDC42     | 6.24 | 0.94 |
| PSMA6     | 0.07 | 0.94 |
| DDOST     | 0.37 | 0.94 |
| HNRNPA2B1 | 1.14 | 0.94 |
| CARHSP1   | 5.73 | 0.94 |
| CCT2      | 1.26 | 0.94 |
| MTHFD1    | 1.90 | 0.94 |
| VDAC1     | 0.50 | 0.94 |
| ANXA2     | 0.96 | 0.93 |
| PSAT1     | 0.53 | 0.93 |
| SMARCC1   | 1.18 | 0.93 |

|          |       |      |
|----------|-------|------|
| RPL13    | 0.28  | 0.93 |
| GRPEL1   | 2.06  | 0.93 |
| PRDX1    | 2.33  | 0.93 |
| PRDX5    | 0.62  | 0.93 |
| STAT1    | 1.23  | 0.93 |
| ATP5L    | 0.95  | 0.92 |
| PSIP1    | 18.28 | 0.92 |
| PHGDH    | 0.06  | 0.92 |
| EPB41L2  | 1.10  | 0.92 |
| CFL1     | 2.20  | 0.92 |
| TIMM44   | 1.06  | 0.92 |
| NDUFS3   | 0.67  | 0.92 |
| GLG1     | 0.68  | 0.92 |
| FXR1     | 0.77  | 0.92 |
| GLS      | 1.57  | 0.92 |
| PPP1R12A | 1.04  | 0.92 |
| RPS12    | 0.38  | 0.91 |
| NOC2L    | 0.49  | 0.91 |
| MLEC     | 0.85  | 0.91 |
| SRPRB    | 0.98  | 0.91 |
| FARSB    | 0.29  | 0.91 |
| ILF2     | 0.82  | 0.91 |
| PSPC1    | 0.96  | 0.90 |
| RBM8A    | 0.24  | 0.90 |
| C21orf33 | 1.03  | 0.90 |
| ENO1     | 0.98  | 0.90 |
| FDFT1    | 0.69  | 0.90 |
| WBP11    | 1.03  | 0.90 |
| EMD      | 0.75  | 0.90 |
| LRPPRC   | 0.51  | 0.90 |
| UQCRC2   | 0.63  | 0.90 |
| DLD      | 0.12  | 0.90 |
| CSNK2A1  | 3.65  | 0.89 |
| FADS2    | 1.21  | 0.89 |
| RBBP7    | 3.55  | 0.89 |
| PGRMC1   | 0.78  | 0.89 |
| FUBP3    | 0.88  | 0.89 |

|         |      |      |
|---------|------|------|
| CCT5    | 1.82 | 0.88 |
| CHD4    | 0.91 | 0.88 |
| GNB1    | 1.92 | 0.88 |
| PFKM    | 1.38 | 0.88 |
| CORO1C  | 0.45 | 0.88 |
| CKAP4   | 0.94 | 0.88 |
| GNB2L1  | 0.23 | 0.88 |
| CYB5R3  | 2.01 | 0.88 |
| TBL3    | 1.33 | 0.87 |
| UBE2I   | 0.87 | 0.87 |
| NONO    | 0.34 | 0.87 |
| CSDE1   | 0.59 | 0.87 |
| LRPAP1  | 0.75 | 0.87 |
| RPN2    | 1.14 | 0.87 |
| WHSC2   | 0.26 | 0.87 |
| SF3A3   | 0.39 | 0.86 |
| MYBBP1A | 0.55 | 0.86 |
| RBM25   | 1.01 | 0.86 |
| API5    | 1.04 | 0.86 |
| VAPB    | 0.77 | 0.86 |
| LRP1    | 1.33 | 0.86 |
| THOC4   | 0.59 | 0.86 |
| PDHB    | 1.00 | 0.86 |
| DHX15   | 0.49 | 0.86 |
| PEX14   | 1.00 | 0.86 |
| BCAS2   | 0.88 | 0.86 |
| HIBADH  | 0.98 | 0.86 |
| NOP58   | 0.97 | 0.86 |
| NAP1L1  | 1.17 | 0.86 |
| RTN3    | 1.07 | 0.85 |
| TUBA1B  | 0.21 | 0.85 |
| POLR1C  | 1.34 | 0.85 |
| TMEM205 | 1.31 | 0.84 |
| CCT3    | 1.00 | 0.83 |
| TPR     | 1.03 | 0.83 |
| DNM1L   | 1.01 | 0.83 |
| SNRPA1  | 0.75 | 0.83 |

|         |       |      |
|---------|-------|------|
| RANBP2  | 0.89  | 0.83 |
| OPA1    | 0.91  | 0.83 |
| ERP44   | 0.72  | 0.83 |
| DDX39   | 0.87  | 0.82 |
| ALDH9A1 | 1.23  | 0.82 |
| P4HA1   | 0.35  | 0.82 |
| LPCAT1  | 0.80  | 0.82 |
| PRPF19  | 2.01  | 0.82 |
| RCN1    | 0.99  | 0.82 |
| ATP1B3  | 0.27  | 0.81 |
| CNPY3   | 0.43  | 0.81 |
| HSPD1   | 1.61  | 0.81 |
| HN1L    | 1.29  | 0.81 |
| DHCR24  | 0.84  | 0.80 |
| GART    | 0.77  | 0.80 |
| DAG1    | 1.69  | 0.80 |
| NHP2L1  | 0.15  | 0.79 |
| EIF4A2  | 0.31  | 0.79 |
| RECQL   | 0.76  | 0.78 |
| ACTN1   | 4.23  | 0.78 |
| CCT4    | 4.33  | 0.78 |
| WDR3    | 17.79 | 0.78 |
| MAPRE1  | 0.72  | 0.78 |
| TPP2    | 1.08  | 0.78 |
| LONP1   | 0.85  | 0.78 |
| GCS1    | 0.73  | 0.78 |
| RALY    | 0.86  | 0.78 |
| GTF2I   | 0.98  | 0.77 |
| MYL6    | 1.15  | 0.77 |
| SMC3    | 0.79  | 0.77 |
| NCAPD2  | 0.60  | 0.77 |
| TXNDC12 | 1.82  | 0.77 |
| CALM1   | 7.15  | 0.77 |
| PCBP2   | 0.92  | 0.77 |
| DNAJA1  | 0.32  | 0.77 |
| EXOSC4  | 0.99  | 0.77 |
| SMARCA4 | 0.49  | 0.76 |

|           |      |      |
|-----------|------|------|
| VPS29     | 0.57 | 0.76 |
| ACIN1     | 1.05 | 0.76 |
| DDB1      | 0.30 | 0.76 |
| SLC25A13  | 0.86 | 0.75 |
| SPTAN1    | 1.02 | 0.75 |
| DEK       | 0.10 | 0.75 |
| KRT8      | 0.12 | 0.75 |
| SNRNP200  | 0.40 | 0.75 |
| GTF3C3    | 0.41 | 0.74 |
| PRKCSH    | 0.46 | 0.73 |
| SPTBN1    | 0.97 | 0.73 |
| C14orf156 | 1.34 | 0.72 |
| NOP2      | 0.48 | 0.72 |
| FEN1      | 1.02 | 0.72 |
| PHB       | 1.04 | 0.72 |
| MFGE8     | 0.42 | 0.72 |
| ERLIN2    | 1.27 | 0.71 |
| PPIB      | 0.31 | 0.71 |
| ASNA1     | 0.68 | 0.71 |
| CACYBP    | 0.56 | 0.70 |
| DHX9      | 0.87 | 0.69 |
| EEF1G     | 0.31 | 0.69 |
| IGF2BP1   | 0.99 | 0.69 |
| GLT25D1   | 1.54 | 0.69 |
| SLC16A1   | 2.78 | 0.68 |
| CAND1     | 1.06 | 0.68 |
| DIABLO    | 0.98 | 0.68 |
| PLS3      | 1.00 | 0.67 |
| EPB41     | 1.69 | 0.67 |
| ILF3      | 1.00 | 0.67 |
| HNRNPH1   | 0.30 | 0.66 |
| SLC25A5   | 0.25 | 0.66 |
| LOC653604 | 0.11 | 0.66 |
| RSL1D1    | 0.55 | 0.66 |
| LMNA      | 0.87 | 0.66 |
| CYCS      | 0.90 | 0.66 |
| LOC653888 | 0.79 | 0.65 |



|          |      |      |
|----------|------|------|
| ADAR     | 0.69 | 0.65 |
| AIMP2    | 0.23 | 0.64 |
| CORO1B   | 0.78 | 0.64 |
| 40058    | 0.93 | 0.63 |
| DDX47    | 0.63 | 0.63 |
| CNN2     | 1.35 | 0.61 |
| PDIA4    | 0.99 | 0.61 |
| TPM3     | 1.19 | 0.61 |
| LIN28    | 1.06 | 0.61 |
| RPN1     | 0.92 | 0.61 |
| DPYSL2   | 0.24 | 0.60 |
| KRT18    | 0.22 | 0.60 |
| CTSC     | 0.48 | 0.59 |
| MARCKSL1 | 1.13 | 0.58 |
| PRPS1    | 0.27 | 0.57 |
| ESYT1    | 0.61 | 0.56 |
| RPL22L1  | 0.72 | 0.56 |
| MIF      | 0.05 | 0.55 |
| MTCH2    | 0.92 | 0.55 |
| LMNB2    | 0.81 | 0.55 |
| FBL      | 0.93 | 0.55 |
| ALDOA    | 0.41 | 0.55 |
| SSRP1    | 0.10 | 0.55 |
| DDX17    | 0.12 | 0.55 |
| MDH2     | 2.41 | 0.54 |
| HMGB1    | 1.77 | 0.54 |
| MSN      | 0.49 | 0.53 |
| HIST1H1B | 0.96 | 0.53 |
| RAN      | 0.12 | 0.53 |
| PRKDC    | 0.34 | 0.53 |
| ATP2A2   | 0.93 | 0.52 |
| GANAB    | 0.90 | 0.51 |
| CSTB     | 0.16 | 0.50 |
| DNMT1    | 0.59 | 0.47 |
| HMGB2    | 1.02 | 0.47 |
| CSDA     | 2.50 | 0.46 |
| SPARC    | 2.09 | 0.46 |

|           |      |      |
|-----------|------|------|
| MARCKS    | 1.36 | 0.45 |
| BZW1      | 0.61 | 0.44 |
| ELAVL1    | 0.67 | 0.44 |
| LDHB      | 0.17 | 0.44 |
| H2AFV     | 0.95 | 0.43 |
| TFRC      | 1.12 | 0.43 |
| ATP5O     | 0.59 | 0.43 |
| NDUFAB1   | 0.81 | 0.42 |
| HIST2H4B  | 0.89 | 0.42 |
| AHNAK     | 1.06 | 0.41 |
| SFRS3     | 0.74 | 0.40 |
| PTPLAD1   | 0.91 | 0.39 |
| HSPE1     | 0.07 | 0.39 |
| TMEM43    | 0.30 | 0.38 |
| HADHB     | 0.54 | 0.38 |
| FSCN1     | 0.21 | 0.38 |
| PGK1      | 0.54 | 0.37 |
| TP53I11   | 1.76 | 0.37 |
| RAB10     | 0.82 | 0.35 |
| H2AFY2    | 0.40 | 0.33 |
| PODXL     | 1.16 | 0.32 |
| MGST1     | 0.44 | 0.29 |
| PARP1     | 0.35 | 0.28 |
| FKBP4     | 0.13 | 0.27 |
| IDH2      | 0.17 | 0.27 |
| MYH9      | 0.94 | 0.26 |
| TECR      | 0.92 | 0.25 |
| SLC2A3    | 0.13 | 0.25 |
| LOC654188 | 0.32 | 0.23 |
| HSPB1     | 0.08 | 0.22 |
| PRDX4     | 0.18 | 0.21 |
| CALU      | 0.43 | 0.18 |
| GAPDH     | 0.31 | 0.12 |

| Gene Symbol | Cytosolic iTRAQ Ratio ESC/ECC | Non-cytosolic iTRAQ Ratio ESC/ECC |
|-------------|-------------------------------|-----------------------------------|
| U2AF2       | 0.90                          | 1.00                              |
| HSPA5       | 1.45                          | 1.54                              |
| HSPA9       | 1.02                          | 1.49                              |
| HSPA8       | 1.95                          | 1.00                              |
| FKBP4       | 0.35                          | 0.27                              |
| FKBP3       | 1.39                          | 1.82                              |
| DBN1        | 0.98                          | 0.97                              |
| ADD1        | 1.04                          | 1.11                              |
| BASP1       | 2.30                          | 1.07                              |
| NDUFAB1     | 0.28                          | 0.42                              |
| CRKL        | 1.13                          | 1.27                              |
| ZC3H18      | 0.51                          | 0.99                              |
| DHX9        | 0.42                          | 0.69                              |
| TCOF1       | 0.80                          | 1.23                              |
| SFRS13A     | 0.83                          | 0.99                              |
| HNRPDL      | 0.79                          | 2.11                              |
| WHSC2       | 0.82                          | 0.87                              |
| EIF2A       | 1.07                          | 1.00                              |
| MRPS23      | 0.88                          | 1.44                              |
| ACLY        | 1.32                          | 1.12                              |
| CSRP2       | 0.90                          | 0.65                              |
| YBX1        | 1.03                          | 1.01                              |
| ATP6V1A     | 1.16                          | 1.06                              |
| ELAVL1      | 1.11                          | 0.44                              |
| HSP90B1     | 1.45                          | 0.99                              |
| GTF3C3      | 0.87                          | 0.74                              |
| POLR1A      | 0.57                          | 0.77                              |
| NHP2L1      | 0.91                          | 0.79                              |
| GEMIN4      | 0.88                          | 1.53                              |
| EDC4        | 0.81                          | 1.04                              |
| TPT1        | 1.11                          | 1.00                              |
| XPO1        | 1.00                          | 1.01                              |
| RPL7A       | 1.07                          | 1.04                              |
| XPO5        | 1.14                          | 1.07                              |

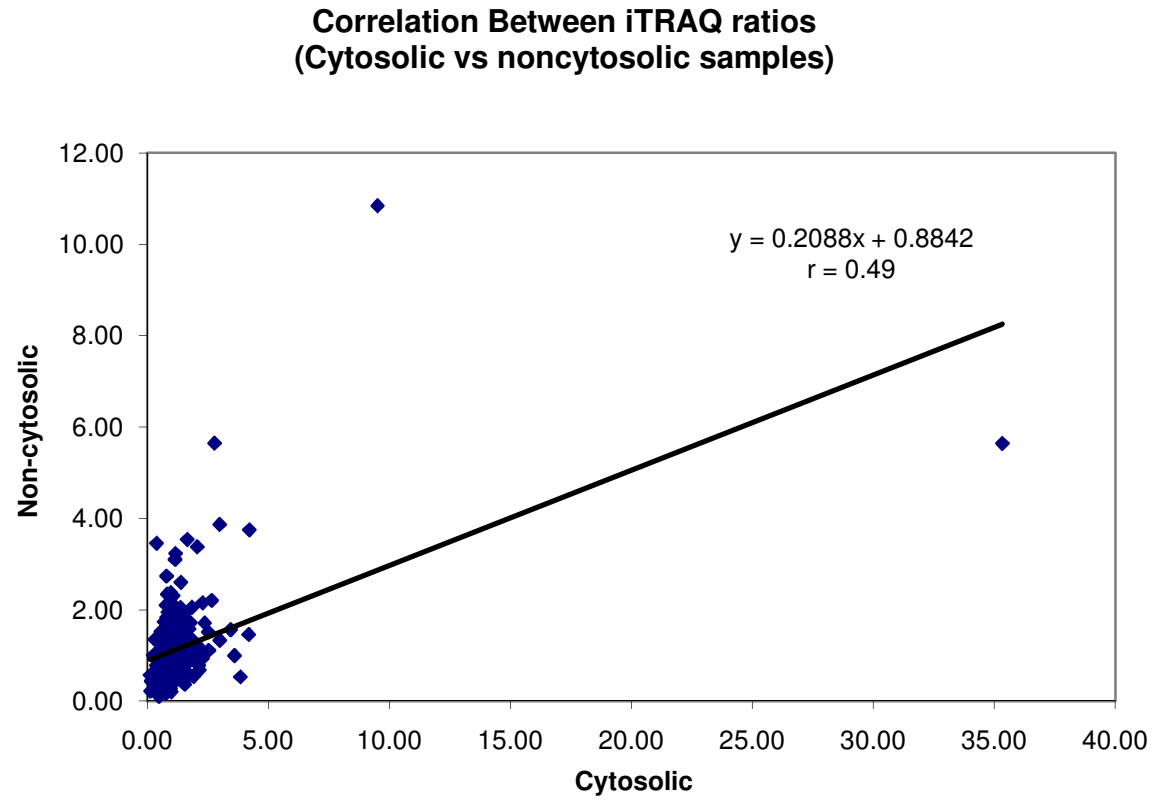

|           |      |      |
|-----------|------|------|
| CSDE1     | 0.90 | 0.87 |
| CCT2      | 0.99 | 0.94 |
| CCT3      | 0.67 | 0.83 |
| CCT7      | 0.44 | 1.03 |
| CCT4      | 1.02 | 0.78 |
| CCT5      | 0.88 | 0.88 |
| EFTUD2    | 0.92 | 1.04 |
| LOC389435 | 1.20 | 1.00 |
| DDX18     | 0.71 | 0.75 |
| GTF2I     | 1.14 | 0.77 |
| ETF1      | 1.47 | 1.46 |
| GPS1      | 0.94 | 0.95 |
| GDI2      | 1.75 | 1.03 |
| GART      | 0.97 | 0.80 |
| PSMD11    | 1.00 | 1.04 |
| PSMD13    | 0.96 | 1.09 |
| GPX1      | 0.95 | 0.81 |
| WDR36     | 0.95 | 0.89 |
| MYBBP1A   | 1.21 | 0.86 |
| GFPT1     | 1.23 | 1.14 |
| FLNB      | 2.17 | 0.96 |
| EIF4A1    | 1.73 | 1.71 |
| KRT19     | 1.85 | 2.06 |
| KRT18     | 0.42 | 0.60 |
| MYH10     | 1.07 | 2.31 |
| GANAB     | 0.60 | 0.51 |
| PELP1     | 1.00 | 1.01 |
| PRKCSH    | 0.82 | 0.73 |
| AKAP12    | 1.15 | 3.11 |
| CDC2      | 0.98 | 1.08 |
| GLS       | 0.79 | 0.92 |
| BRIX1     | 0.75 | 0.82 |
| DDB1      | 0.59 | 0.76 |
| COX4I1    | 0.83 | 1.01 |
| LOC644166 | 0.98 | 1.05 |
| HSPE1     | 0.93 | 0.39 |
| MARS      | 1.04 | 1.22 |

|          |       |      |
|----------|-------|------|
| RBM4     | 0.88  | 1.05 |
| RPL23A   | 1.53  | 1.09 |
| EIF4G2   | 1.05  | 0.96 |
| EEF1A1   | 1.72  | 1.59 |
| HMGB1    | 3.84  | 0.54 |
| PSMD6    | 0.97  | 1.19 |
| PSMD3    | 0.96  | 1.27 |
| PSMD2    | 0.57  | 1.30 |
| CPSF6    | 0.78  | 2.11 |
| PLEC1    | 1.11  | 1.32 |
| HIST2H4B | 1.52  | 0.42 |
| EIF2S3   | 0.96  | 1.09 |
| CAD      | 0.95  | 1.04 |
| SMARCC1  | 0.89  | 0.93 |
| DDX17    | 0.55  | 0.55 |
| NMT1     | 1.16  | 3.24 |
| PMPCB    | 0.80  | 0.99 |
| AASS     | 2.77  | 5.65 |
| VPS29    | 1.51  | 0.76 |
| NUDC     | 0.64  | 1.04 |
| IMPDH2   | 0.65  | 0.98 |
| CSE1L    | 1.02  | 0.99 |
| PSMC1    | 0.98  | 1.11 |
| PSMC2    | 0.95  | 1.02 |
| MAGEA4   | 35.32 | 5.64 |
| PSMC5    | 0.96  | 0.99 |
| EEF1A2   | 0.75  | 0.90 |
| CTSC     | 1.02  | 0.59 |
| HEATR2   | 0.96  | 1.04 |
| RTN4     | 1.05  | 1.39 |
| NOLC1    | 0.89  | 1.14 |
| KPNB1    | 1.01  | 1.11 |
| RTN3     | 0.86  | 0.85 |
| FXR1     | 0.85  | 0.92 |
| CALR     | 1.69  | 1.01 |
| CALU     | 0.77  | 0.18 |
| RBMX     | 0.92  | 1.80 |

|           |      |      |
|-----------|------|------|
| NCL       | 0.59 | 1.07 |
| NAP1L1    | 0.59 | 0.86 |
| BZW1      | 1.02 | 0.44 |
| EEF2      | 2.06 | 1.01 |
| CHERP     | 0.76 | 1.02 |
| TRMT112   | 0.92 | 1.12 |
| HUWE1     | 0.91 | 1.25 |
| MIF       | 1.49 | 0.55 |
| PRPF8     | 0.85 | 1.01 |
| LRRC47    | 1.09 | 1.74 |
| EIF3I     | 0.80 | 1.09 |
| EIF3M     | 1.31 | 1.97 |
| HYOU1     | 1.21 | 1.41 |
| RAN       | 0.86 | 0.53 |
| EIF3B     | 0.93 | 1.15 |
| ARHGEF2   | 0.74 | 0.65 |
| EIF3E     | 0.99 | 1.03 |
| CARHSP1   | 1.13 | 0.94 |
| LOC401206 | 0.99 | 1.20 |
| DPY30     | 1.05 | 1.16 |
| DNAJA1    | 0.92 | 0.77 |
| TPR       | 0.94 | 0.83 |
| PHGDH     | 0.66 | 0.92 |
| ATP6V1B2  | 0.68 | 0.97 |
| SYNCRIP   | 1.01 | 1.02 |
| VAT1      | 0.96 | 1.66 |
| PSMC3     | 0.64 | 1.04 |
| SNRPD1    | 0.82 | 1.02 |
| VIM       | 0.60 | 1.03 |
| C14orf166 | 1.05 | 1.17 |
| SPTAN1    | 1.13 | 0.75 |
| FUBP1     | 0.99 | 2.16 |
| KHDRBS1   | 0.32 | 1.36 |
| LAMB1     | 1.39 | 2.61 |
| CCAR1     | 0.72 | 1.43 |
| U2AF1     | 0.65 | 0.99 |
| ADAR      | 0.84 | 0.65 |

|          |      |      |
|----------|------|------|
| KHSRP    | 0.74 | 1.03 |
| MTA1     | 0.73 | 0.73 |
| DDX54    | 0.97 | 0.97 |
| EIF4A2   | 0.36 | 0.79 |
| TKT      | 1.84 | 1.01 |
| MSH2     | 1.62 | 1.24 |
| L1TD1    | 2.06 | 3.38 |
| WDR3     | 0.92 | 0.78 |
| DPYSL2   | 0.64 | 0.60 |
| POLR1C   | 0.80 | 0.85 |
| IGFBP2   | 1.24 | 0.71 |
| ABCF2    | 0.98 | 1.07 |
| LARS     | 1.02 | 1.03 |
| MTHFD1   | 2.27 | 0.94 |
| GTPBP4   | 0.70 | 0.53 |
| SPARC    | 0.52 | 0.46 |
| TUBB     | 0.70 | 1.00 |
| GTPBP1   | 1.06 | 1.19 |
| MDN1     | 1.00 | 1.85 |
| RBM8A    | 0.58 | 0.90 |
| ADSS     | 1.01 | 1.40 |
| RPLP2    | 1.08 | 1.03 |
| RPLP1    | 1.73 | 1.19 |
| RPLP0    | 1.08 | 1.00 |
| TCERG1   | 0.99 | 0.83 |
| C1QBP    | 0.92 | 1.01 |
| RACGAP1  | 1.36 | 1.22 |
| ATP5A1   | 1.39 | 1.00 |
| TPM3     | 0.92 | 0.61 |
| SNRPA1   | 0.73 | 0.83 |
| HNRNPAB  | 1.00 | 1.05 |
| HNRNPL   | 0.84 | 0.98 |
| SRP72    | 0.96 | 2.38 |
| PPP1R12A | 0.87 | 0.92 |
| ETFA     | 0.92 | 0.95 |
| LIN28    | 0.60 | 0.61 |
| CSTB     | 0.88 | 0.50 |

|         |      |      |
|---------|------|------|
| HNRNPA3 | 0.71 | 0.98 |
| HNRNPA1 | 0.55 | 1.09 |
| ENO1    | 1.65 | 0.90 |
| CORO1B  | 1.40 | 0.64 |
| SND1    | 1.08 | 1.08 |
| RPS4X   | 0.97 | 1.06 |
| IGF2BP3 | 0.86 | 1.05 |
| NAT10   | 0.93 | 1.08 |
| ATXN2L  | 0.94 | 0.93 |
| SKIV2L2 | 1.01 | 1.02 |
| TCP1    | 0.95 | 0.98 |
| RPL10A  | 1.49 | 1.48 |
| SF3B5   | 0.79 | 0.96 |
| PRDX6   | 2.17 | 1.12 |
| PRDX5   | 0.98 | 0.93 |
| PRDX4   | 0.99 | 0.21 |
| SF3B1   | 0.59 | 1.01 |
| SF3B3   | 0.85 | 0.97 |
| IQGAP1  | 1.62 | 1.17 |
| PFKP    | 3.44 | 1.57 |
| HSPD1   | 0.62 | 0.81 |
| PFKM    | 0.53 | 0.88 |
| EPRS    | 0.90 | 1.24 |
| CCT6A   | 0.75 | 1.08 |
| YWHAE   | 0.95 | 0.99 |
| COPA    | 0.38 | 3.46 |
| MAT2A   | 1.10 | 1.24 |
| COPE    | 0.55 | 1.53 |
| WARS    | 2.99 | 1.34 |
| VCP     | 1.37 | 1.02 |
| DYNC1H1 | 2.07 | 1.23 |
| CALD1   | 4.19 | 1.46 |
| DDX21   | 1.13 | 1.05 |
| HN1L    | 1.40 | 0.81 |
| TARS    | 2.54 | 1.12 |
| SART1   | 0.59 | 0.81 |
| TUFM    | 0.54 | 1.15 |



|           |      |      |
|-----------|------|------|
| ACTG1     | 0.95 | 0.43 |
| FKBP10    | 1.03 | 1.12 |
| HNRNPA0   | 0.88 | 1.36 |
| MYL6      | 1.55 | 0.77 |
| IGF2BP1   | 0.69 | 0.69 |
| CAPRIN1   | 0.91 | 0.94 |
| TXNDC5    | 1.01 | 1.04 |
| SNRNP200  | 0.52 | 0.75 |
| CALM1     | 1.03 | 0.77 |
| DNMT1     | 1.13 | 0.47 |
| MARCKS    | 0.16 | 0.45 |
| WDR61     | 1.04 | 0.71 |
| MAPRE1    | 1.21 | 0.78 |
| LUC7L2    | 0.66 | 0.95 |
| TTN       | 1.21 | 1.04 |
| IARS      | 1.00 | 1.06 |
| TRIM28    | 2.98 | 3.87 |
| PRPSAP2   | 0.90 | 1.16 |
| IDH2      | 0.33 | 0.27 |
| IDH1      | 1.37 | 2.05 |
| PRMT1     | 1.05 | 1.07 |
| SH3GLB2   | 1.02 | 1.44 |
| RPL11     | 1.28 | 1.70 |
| RPL13     | 1.36 | 0.93 |
| RPL18     | 1.15 | 1.19 |
| C21orf33  | 0.80 | 0.90 |
| NME4      | 0.62 | 0.39 |
| CNN2      | 1.34 | 0.61 |
| FUBP3     | 1.03 | 0.89 |
| RBBP7     | 0.45 | 0.89 |
| ARCN1     | 0.87 | 1.00 |
| KPNA4     | 0.97 | 1.00 |
| LYAR      | 0.56 | 0.63 |
| KPNA2     | 1.34 | 1.86 |
| COPB1     | 0.79 | 2.74 |
| COPB2     | 0.81 | 2.35 |
| LOC652826 | 1.05 | 1.04 |

|           |      |       |
|-----------|------|-------|
| GAPDH     | 0.48 | 0.12  |
| HIBADH    | 0.78 | 0.86  |
| MATR3     | 0.63 | 1.47  |
| SF3B2     | 0.94 | 1.02  |
| XRCC5     | 0.98 | 1.16  |
| XRCC6     | 0.99 | 1.46  |
| LOC645619 | 1.55 | 1.93  |
| ABCF1     | 0.96 | 0.99  |
| NONO      | 1.00 | 0.87  |
| AHNAK     | 0.51 | 0.41  |
| RPS3A     | 1.02 | 0.99  |
| RBM39     | 0.98 | 0.95  |
| PGK1      | 0.57 | 0.37  |
| GSPT2     | 1.05 | 0.86  |
| FAM98A    | 1.28 | 1.53  |
| UMPS      | 0.90 | 1.08  |
| ERP29     | 0.98 | 0.96  |
| PARP1     | 0.96 | 0.28  |
| SFPQ      | 0.96 | 1.46  |
| RSL1D1    | 0.68 | 0.66  |
| PWP1      | 0.90 | 1.08  |
| UBE2I     | 0.92 | 0.87  |
| SLC3A2    | 1.65 | 3.54  |
| SAFB2     | 0.87 | 0.84  |
| ASNA1     | 0.93 | 0.71  |
| ACTC1     | 9.51 | 10.84 |
| RPL18A    | 1.90 | 1.00  |
| RPS15A    | 1.36 | 1.92  |
| RPS7      | 1.39 | 1.51  |
| RPS6      | 1.09 | 1.05  |
| RPS3      | 1.11 | 2.00  |
| RPS2      | 1.04 | 1.37  |
| KRT8      | 0.42 | 0.75  |
| BCAS2     | 0.84 | 0.86  |
| RPS9      | 1.21 | 1.05  |
| RPS8      | 1.02 | 1.34  |
| GNB2L1    | 2.01 | 0.88  |

|           |      |      |
|-----------|------|------|
| LOC732337 | 1.01 | 0.94 |
| SEC23A    | 1.20 | 1.31 |
| STAT1     | 0.97 | 0.93 |
| RPS14     | 1.02 | 1.16 |
| PSMA1     | 1.12 | 1.00 |
| PSMA6     | 1.24 | 0.94 |
| THOC4     | 0.55 | 0.86 |
| MARCKSL1  | 0.12 | 0.58 |
| RPS24     | 1.01 | 1.00 |
| RPS18     | 0.96 | 1.25 |
| LOC653888 | 1.02 | 0.65 |
| RPS20     | 0.99 | 1.55 |
| PRDX3     | 0.65 | 1.00 |
| C21orf70  | 1.13 | 0.99 |
| WBP11     | 1.46 | 0.90 |
| PRDX1     | 0.64 | 0.93 |
| ARPC4     | 1.12 | 1.02 |
| FSCN1     | 1.54 | 0.38 |
| KIAA1967  | 0.51 | 1.02 |
| FARSB     | 0.94 | 0.91 |
| RPRD1B    | 0.83 | 0.72 |
| PPIB      | 1.02 | 0.71 |
| API5      | 0.83 | 0.86 |
| PPP2R1A   | 0.99 | 0.99 |
| TRIM71    | 1.07 | 1.03 |
| CYFIP2    | 1.22 | 1.15 |
| MAGOHB    | 0.25 | 1.01 |
| AIMP2     | 0.96 | 0.64 |
| CYCS      | 1.00 | 0.66 |
| MDH2      | 0.51 | 0.54 |
| MAP4      | 1.29 | 1.19 |
| C22orf28  | 0.99 | 1.09 |
| RPL24     | 1.04 | 1.32 |
| RPL27     | 1.49 | 1.02 |
| PAR6B     | 0.85 | 0.87 |
| TLN1      | 0.81 | 1.00 |
| APEX1     | 2.00 | 1.05 |

|           |      |      |
|-----------|------|------|
| HNRNPA2B1 | 0.46 | 0.94 |
| ANXA2     | 0.59 | 0.93 |
| HSPB1     | 0.13 | 0.22 |
| MCM7      | 0.74 | 1.36 |
| MCM6      | 0.75 | 0.98 |
| MCM3      | 0.98 | 1.01 |
| FLNA      | 3.60 | 1.00 |
| ALDOA     | 1.07 | 0.55 |
| NUDT21    | 0.77 | 0.99 |
| SAMHD1    | 0.91 | 0.97 |
| PPP1CA    | 0.95 | 0.91 |
| SFRS8     | 0.89 | 0.94 |
| ENY2      | 1.11 | 1.53 |
| PSAT1     | 1.25 | 0.93 |
| BAT2D1    | 1.00 | 1.03 |
| SHMT2     | 0.89 | 0.95 |
| EIF4A3    | 0.97 | 0.95 |
| ILF3      | 0.67 | 0.67 |
| ILF2      | 0.57 | 0.91 |
| LRPPRC    | 0.92 | 0.90 |
| DARS      | 0.96 | 1.32 |
| NME1-NME2 | 1.76 | 1.06 |
| IK        | 0.76 | 0.84 |
| OAT       | 1.40 | 1.92 |
| DHX15     | 0.86 | 0.86 |
| S100A10   | 1.24 | 1.26 |
| UGP2      | 2.65 | 2.21 |
| RPL22L1   | 0.76 | 0.56 |
| DDX39     | 0.96 | 0.82 |
| AHCYL2    | 0.92 | 1.21 |
| HSP90AB1  | 1.78 | 1.72 |
| GOT2      | 1.13 | 1.33 |
| LOC654188 | 0.83 | 0.23 |
| PTBP1     | 1.01 | 2.06 |
| DDX3X     | 0.98 | 1.67 |
| P4HB      | 2.51 | 1.52 |
| HK1       | 1.02 | 1.86 |

|           |      |      |
|-----------|------|------|
| RANGAP1   | 1.02 | 1.10 |
| ILK       | 1.11 | 1.10 |
| PA2G4     | 0.96 | 0.97 |
| CSNK2A1   | 0.51 | 0.89 |
| H2AFV     | 0.80 | 0.43 |
| CIRH1A    | 0.83 | 1.21 |
| EEF1G     | 2.15 | 0.69 |
| EIF4G1    | 0.97 | 1.05 |
| RPS5      | 0.95 | 1.62 |
| CD2AP     | 1.56 | 1.45 |
| DDX5      | 0.85 | 1.03 |
| DDX1      | 1.15 | 1.43 |
| MTA3      | 0.94 | 0.75 |
| EEF1D     | 2.37 | 1.71 |
| RPL8      | 1.30 | 0.99 |
| RPL9      | 1.12 | 1.64 |
| RPL6      | 1.38 | 1.23 |
| PABPC1    | 1.03 | 1.50 |
| RPL4      | 1.25 | 0.99 |
| RPL5      | 1.03 | 1.89 |
| PABPC4    | 1.03 | 1.07 |
| RPL3      | 1.27 | 1.23 |
| FEN1      | 0.75 | 0.72 |
| CLTC      | 0.70 | 1.01 |
| CSDA      | 0.85 | 0.46 |
| LUC7L     | 0.88 | 0.86 |
| SNRPE     | 0.86 | 0.80 |
| LOC650283 | 1.11 | 1.31 |
| TRAP1     | 0.92 | 1.05 |
| TUBA1B    | 0.92 | 0.85 |
| PCBP2     | 0.97 | 0.77 |
| NACA      | 1.45 | 1.17 |
| RCN1      | 0.68 | 0.82 |
| KIAA0368  | 1.52 | 1.25 |
| ARPC2     | 1.32 | 0.96 |
| DAG1      | 1.46 | 0.80 |
| POLR2B    | 0.88 | 0.94 |

|           |      |      |
|-----------|------|------|
| RBM25     | 0.78 | 0.86 |
| BAT3      | 0.79 | 1.84 |
| BAT1      | 1.07 | 1.00 |
| LOC653232 | 1.42 | 1.37 |
| IPO7      | 0.62 | 1.01 |
| PKM2      | 0.72 | 0.97 |
| SF3A3     | 0.70 | 0.86 |
| HNRNPH1   | 0.62 | 0.66 |
| DIABLO    | 0.70 | 0.68 |
| HNRNPH3   | 0.76 | 0.99 |
| NES       | 0.97 | 1.45 |
| TNPO3     | 0.71 | 0.98 |
| HNRNPR    | 0.84 | 0.96 |
| HNRNPU    | 0.57 | 1.01 |
| GCN1L1    | 1.16 | 1.10 |
| METAP1    | 1.12 | 0.88 |
| HNRNPK    | 0.74 | 1.02 |
| FASN      | 0.72 | 1.00 |
| HNRNPM    | 0.91 | 1.90 |
| RPL7      | 1.83 | 1.36 |
| HNRNPC    | 0.59 | 1.00 |
| HNRNPD    | 0.72 | 0.96 |
| HNRNPF    | 1.22 | 1.24 |
| HELLS     | 1.10 | 1.11 |
| HDLBP     | 1.04 | 1.28 |
| LOC441246 | 1.06 | 1.10 |
| RCC2      | 2.29 | 2.16 |
| ARL6IP1   | 0.90 | 1.01 |
| ERP44     | 1.04 | 0.83 |
| HNRNPUL1  | 1.31 | 1.34 |
| RPL39     | 1.08 | 1.29 |
| SMU1      | 0.47 | 1.04 |
| RPL36     | 1.45 | 0.97 |
| HSP90AA1  | 0.89 | 0.95 |
| PSMB5     | 1.14 | 1.15 |
| PSMB1     | 1.04 | 1.29 |
| FBL       | 0.46 | 0.55 |

|           |      |      |
|-----------|------|------|
| RPS13     | 1.05 | 1.49 |
| KARS      | 1.05 | 1.02 |
| RPS11     | 1.26 | 1.06 |
| RPS10     | 0.98 | 1.20 |
| RPS17     | 1.07 | 1.09 |
| RPS16     | 1.03 | 1.54 |
| SSRP1     | 1.91 | 0.55 |
| RPS19     | 1.02 | 1.05 |
| SCP2      | 0.77 | 0.96 |
| MSN       | 0.77 | 0.53 |
| HSPA1A    | 2.35 | 1.06 |
| RPL30     | 1.09 | 1.08 |
| CACYBP    | 0.47 | 0.70 |
| RPS23     | 1.09 | 0.99 |
| CAND1     | 0.71 | 0.68 |
| PRPS1     | 0.34 | 0.57 |
| PRPF19    | 0.78 | 0.82 |
| SFRS3     | 1.06 | 0.40 |
| EXOSC4    | 0.74 | 0.77 |
| LDHB      | 0.15 | 0.44 |
| SIN3A     | 0.65 | 0.96 |
| PLS3      | 1.57 | 0.67 |
| ALDH9A1   | 0.88 | 0.82 |
| PDIA6     | 0.97 | 1.06 |
| PDIA4     | 0.56 | 0.61 |
| PDIA3     | 1.52 | 1.81 |
| USP10     | 1.08 | 1.33 |
| CFL1      | 0.63 | 0.92 |
| EIF3G     | 1.01 | 1.21 |
| LOC143244 | 1.25 | 0.95 |
| NPM1      | 0.70 | 1.75 |
| LOC644820 | 1.09 | 1.75 |
| DAZAP1    | 0.72 | 0.99 |
| ACTN1     | 2.13 | 0.78 |
| RPL38     | 0.86 | 1.95 |
| ACTN4     | 1.90 | 1.03 |
| EZR       | 4.21 | 3.75 |

|          |      |      |
|----------|------|------|
| RPL31    | 1.14 | 1.13 |
| G3BP1    | 1.25 | 1.69 |
| DKC1     | 0.61 | 0.92 |
| PTRF     | 1.04 | 1.31 |
| DNM1L    | 0.59 | 0.83 |
| SERPINH1 | 0.99 | 1.07 |
