# Supplementary material
Source: PubMed Central journal article supplement (PMC3086450)

**ECCs**

**ESC**s

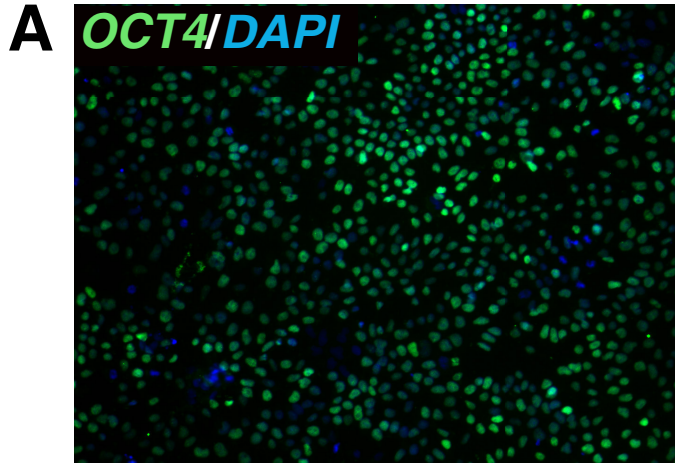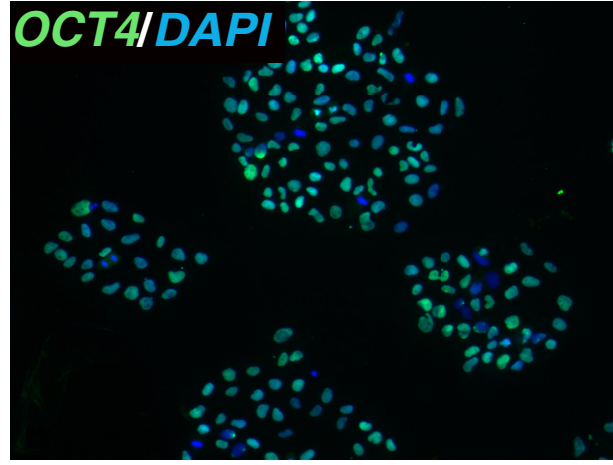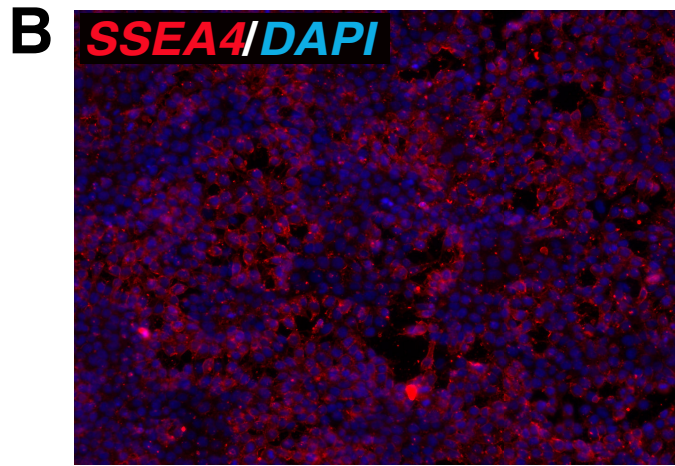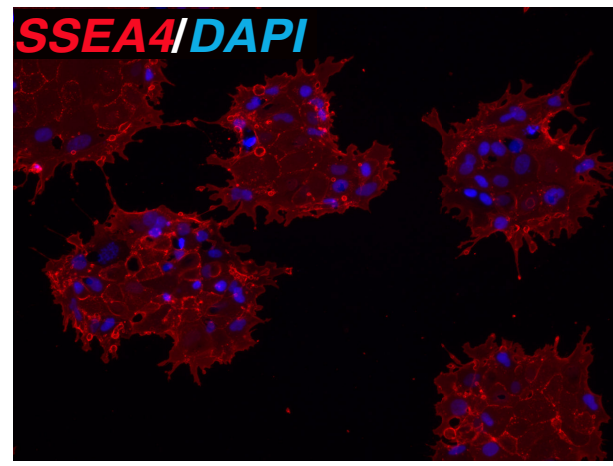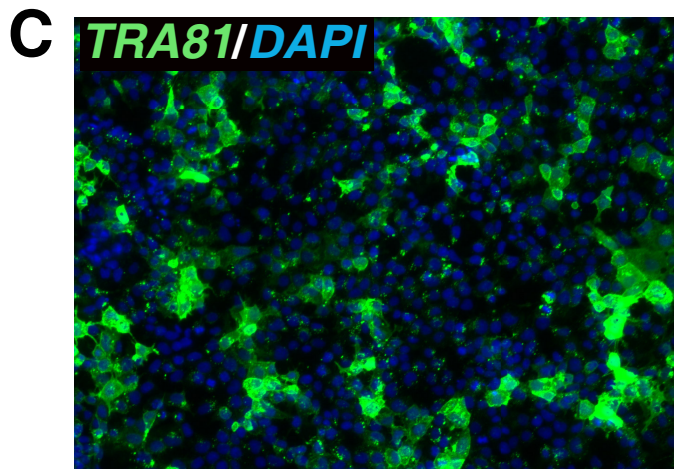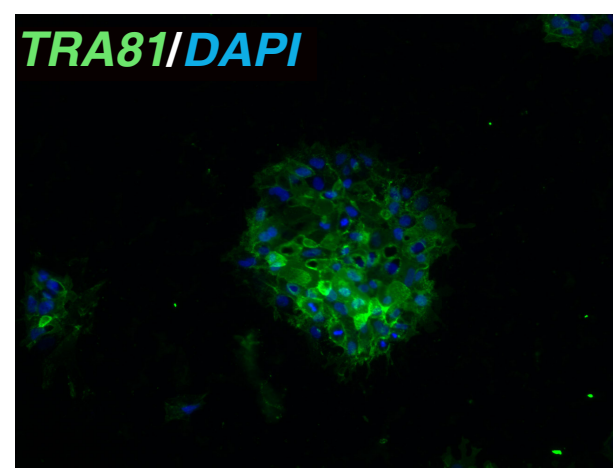

Supplementary Figure 1

Supplement: NIHMS283894-supplement-Supplementary_Figure_1.pdf [file NIHMS283894-supplement-Supplementary_Figure_1.pdf]

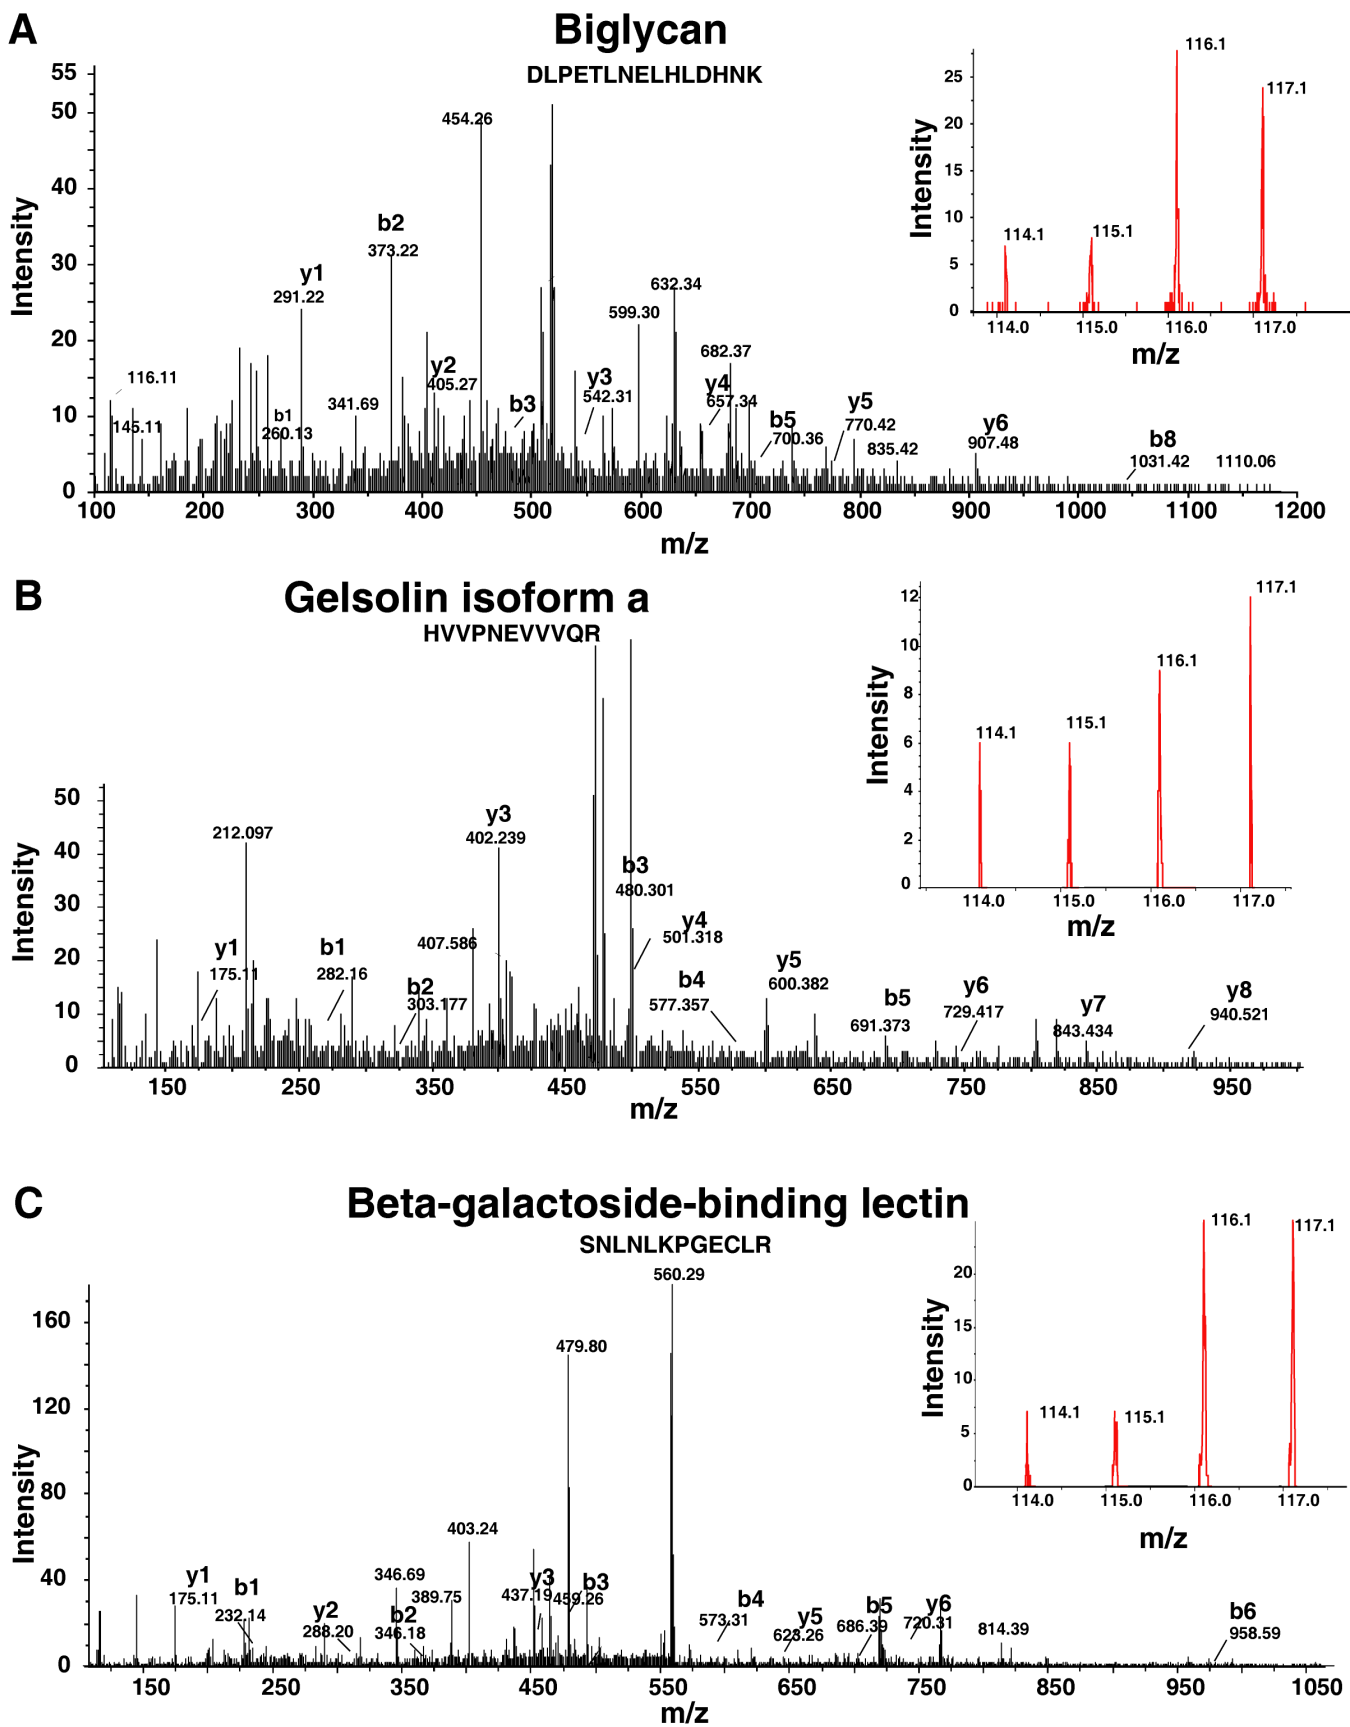

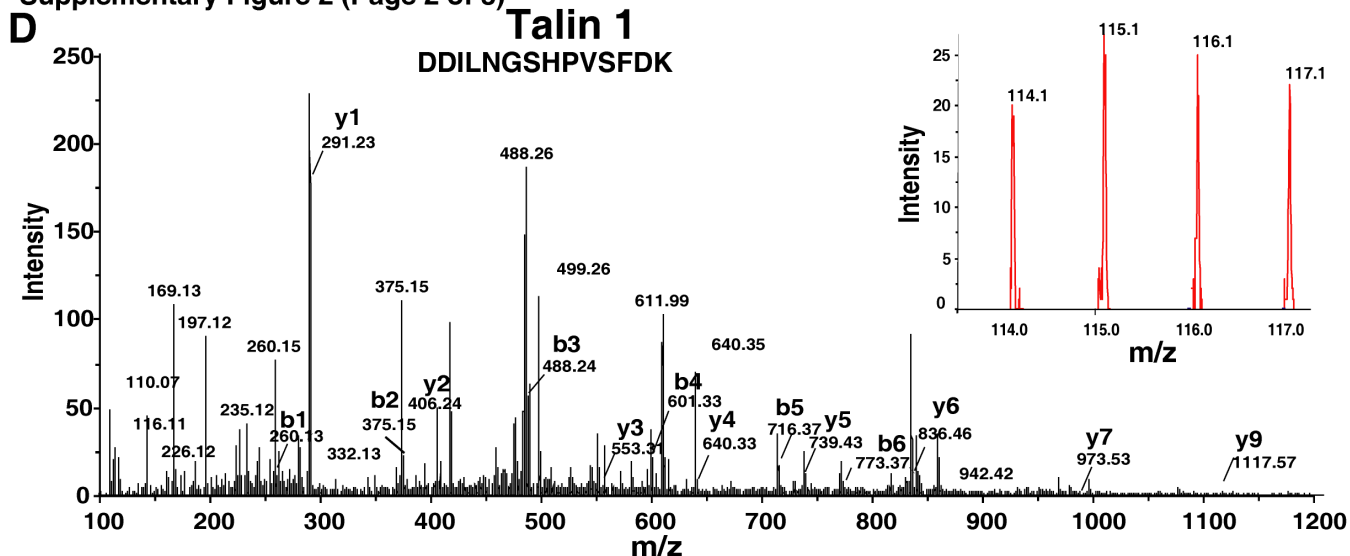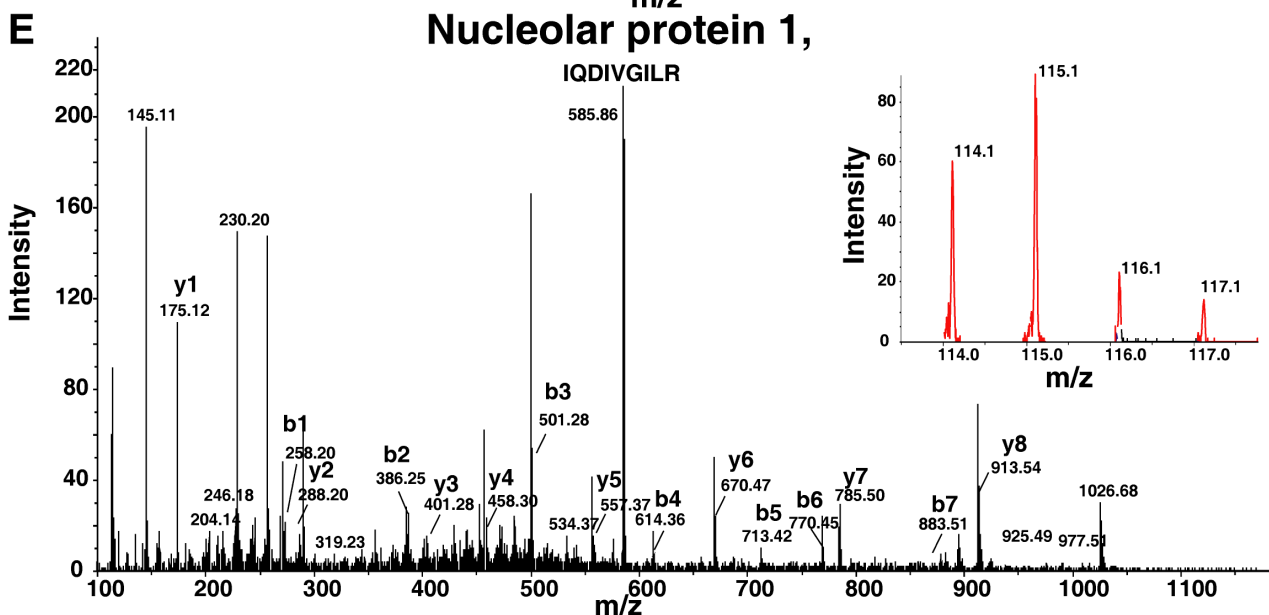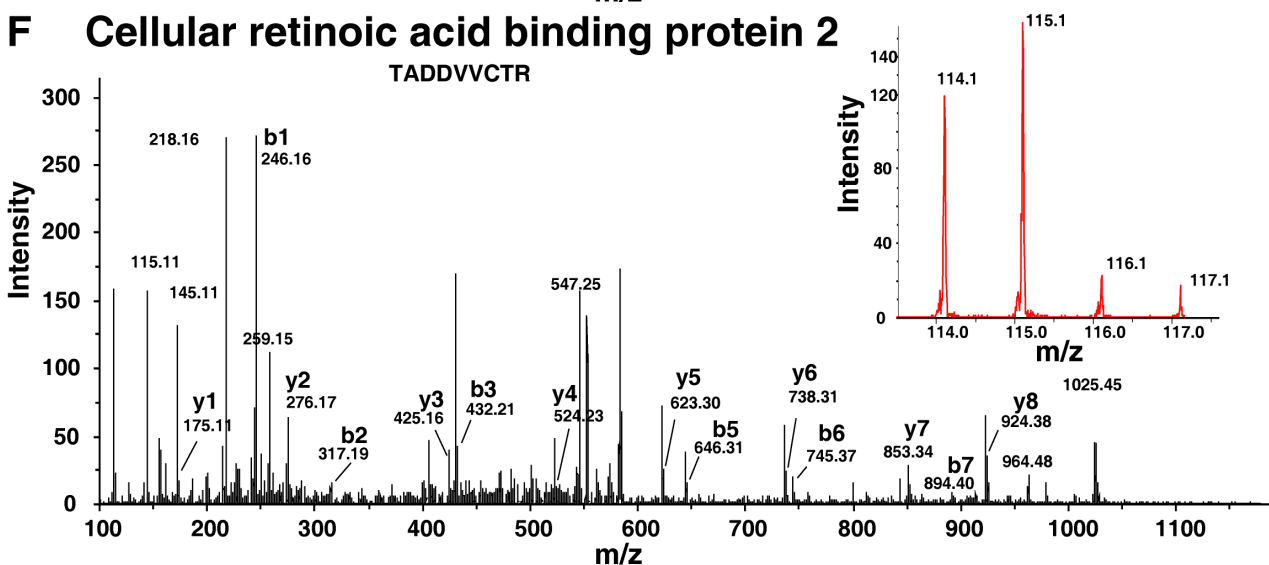

### G Developmental pluripotency associated 4

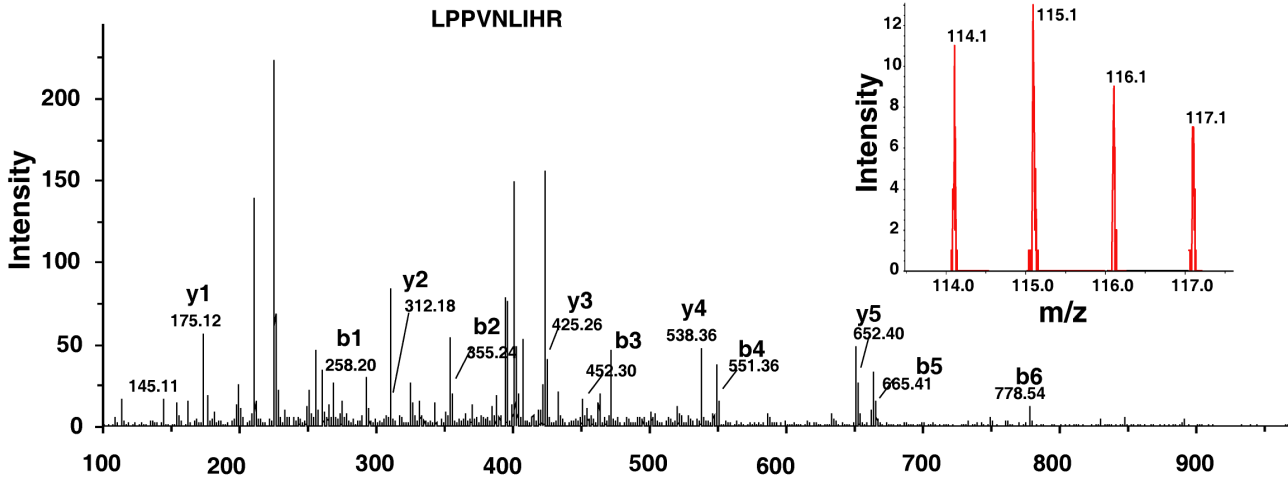

### H

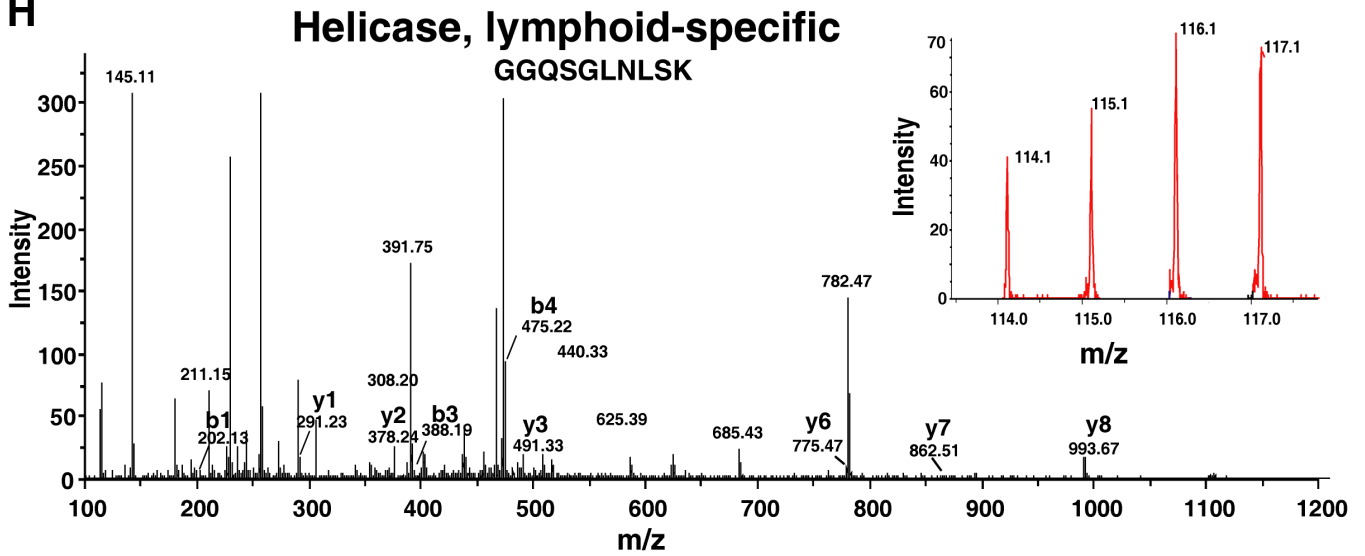

Supplement: NIHMS283894-supplement-Supplementary_Figure_2.pdf [file NIHMS283894-supplement-Supplementary_Figure_2.pdf]
